# Supplementary material
Source: PubMed Central journal article supplement (PMC4223482)

Relative Intensity(%)

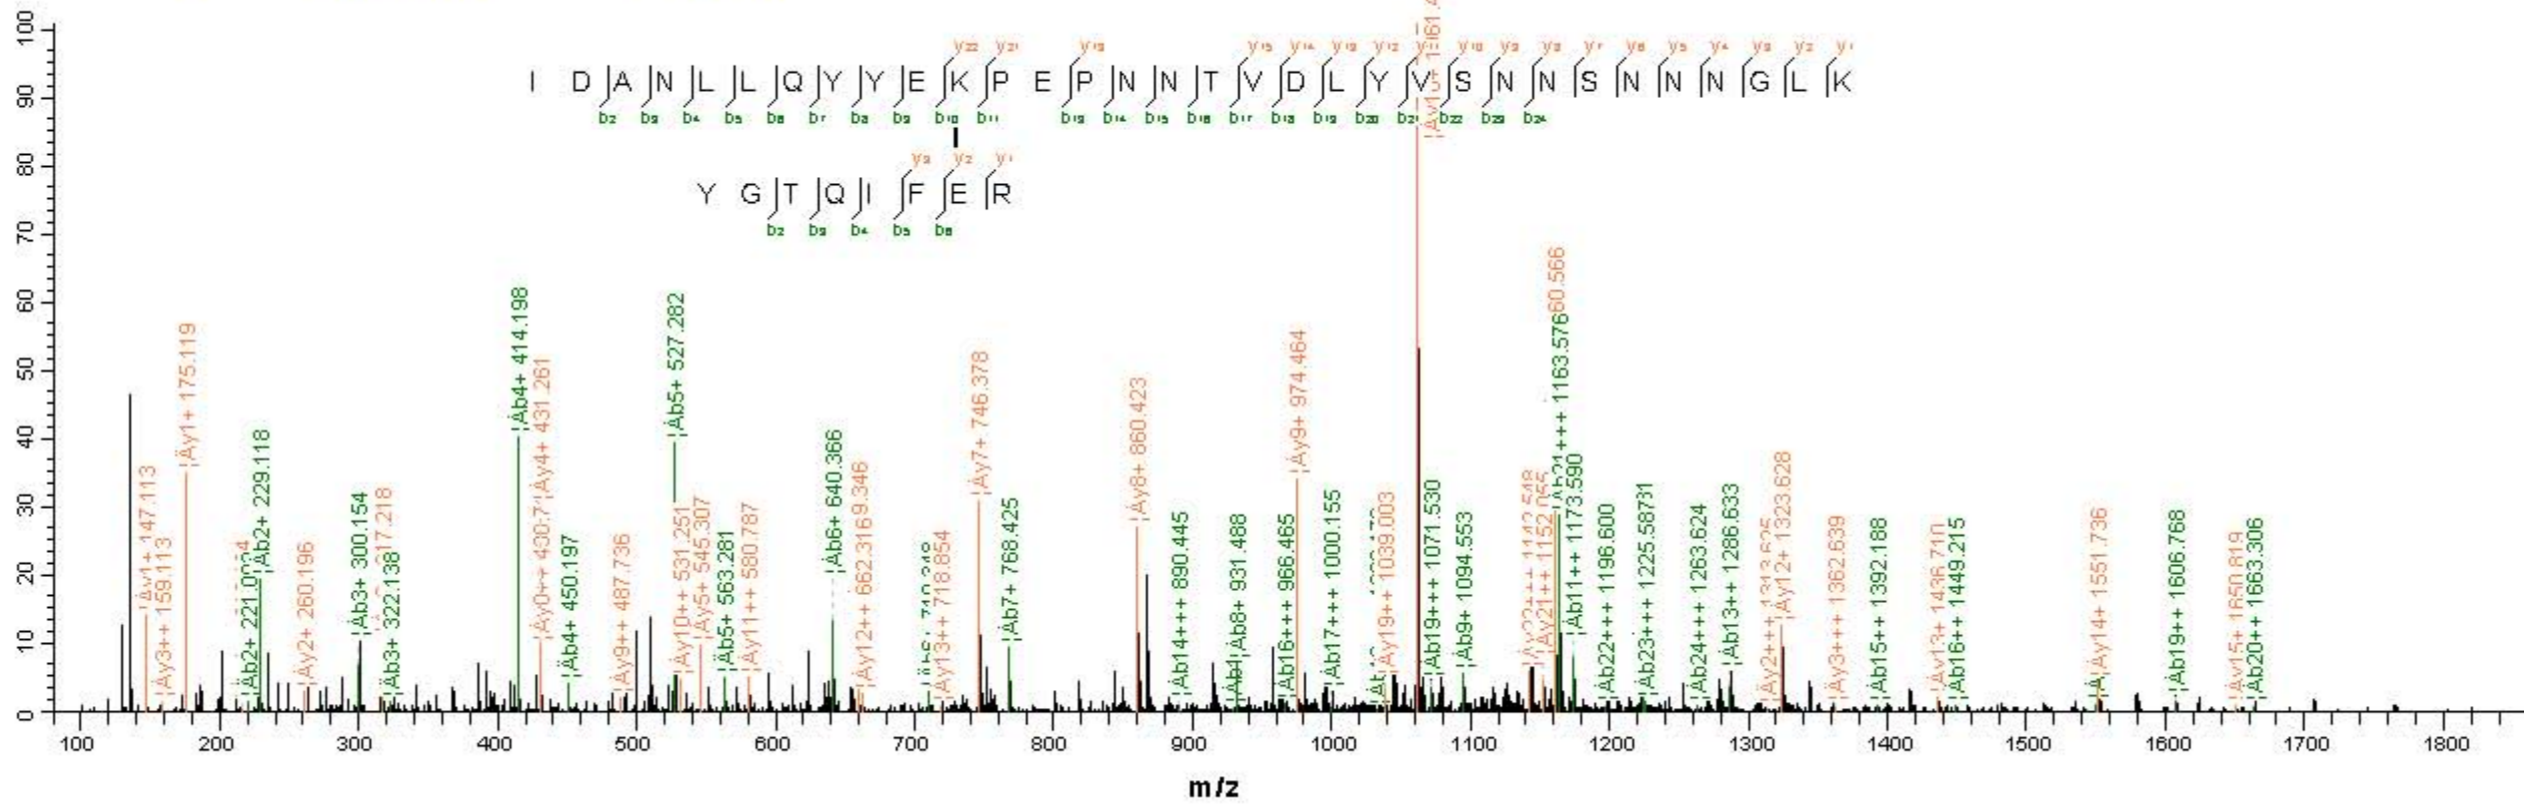

I D A N L L Q Y Y E K P E P N N T V D L Y V S N N S N N N G L K  
 b2 b3 b4 b5 b6 b7 b8 b9 b10 b11 b12 b13 b14 b15 b16 b17 b18 b19 b20 b21 b22 b23 b24 b25 b26 b27 b28 b29 b30 b31 b32 b33 b34 b35 b36 b37 b38 b39 b40 b41 b42 b43 b44 b45 b46 b47 b48 b49 b50 b51 b52 b53 b54 b55 b56 b57 b58 b59 b60 b61 b62 b63 b64 b65 b66 b67 b68 b69 b70 b71 b72 b73 b74 b75 b76 b77 b78 b79 b80 b81 b82 b83 b84 b85 b86 b87 b88 b89 b90 b91 b92 b93 b94 b95 b96 b97 b98 b99

Y G T Q I F E R  
 b2 b3 b4 b5 b6 b7 b8 b9 b10 b11 b12 b13 b14 b15 b16 b17 b18 b19 b20 b21 b22 b23 b24 b25 b26 b27 b28 b29 b30 b31 b32 b33 b34 b35 b36 b37 b38 b39 b40 b41 b42 b43 b44 b45 b46 b47 b48 b49 b50 b51 b52 b53 b54 b55 b56 b57 b58 b59 b60 b61 b62 b63 b64 b65 b66 b67 b68 b69 b70 b71 b72 b73 b74 b75 b76 b77 b78 b79 b80 b81 b82 b83 b84 b85 b86 b87 b88 b89 b90 b91 b92 b93 b94 b95 b96 b97 b98 b99

Charge: 4 MH+: 2227.1952 Score: 1.68e-006

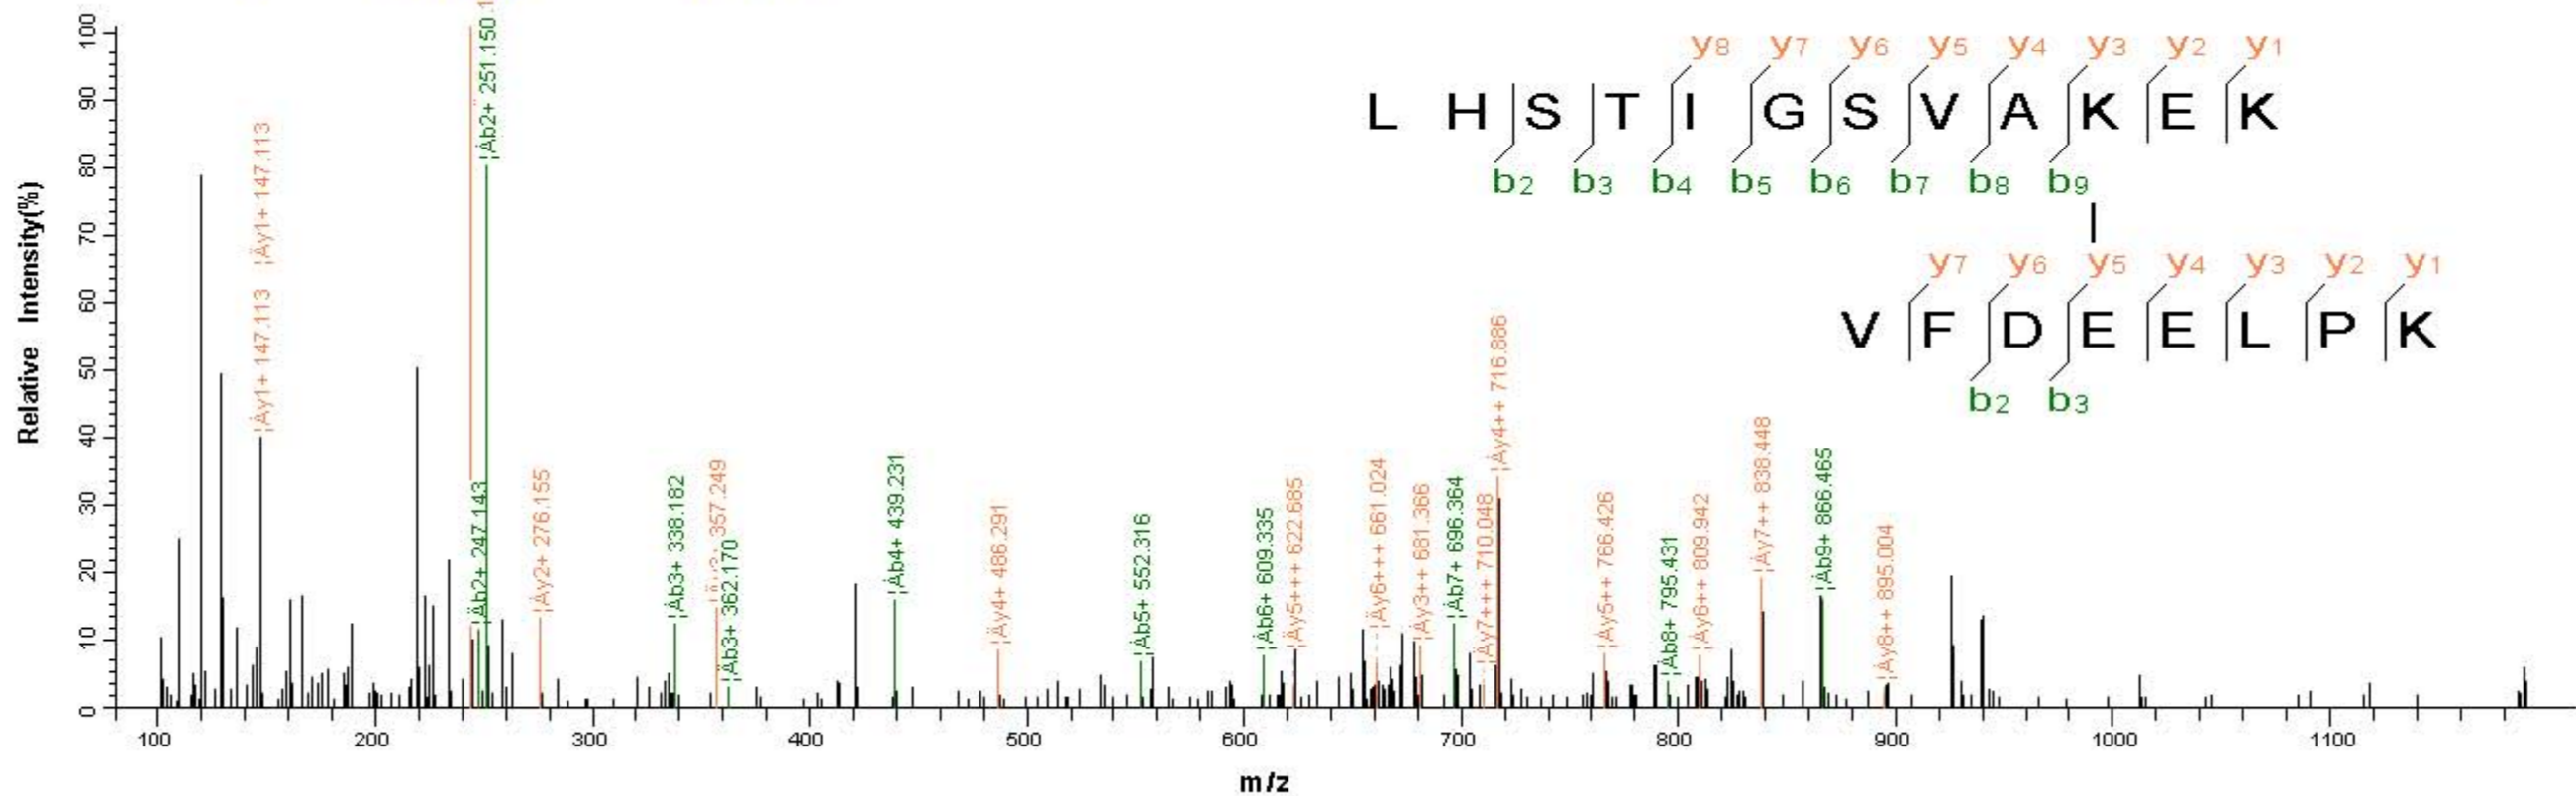

Charge: 4 MH+: 2994.4320 Score: 2.79e-005

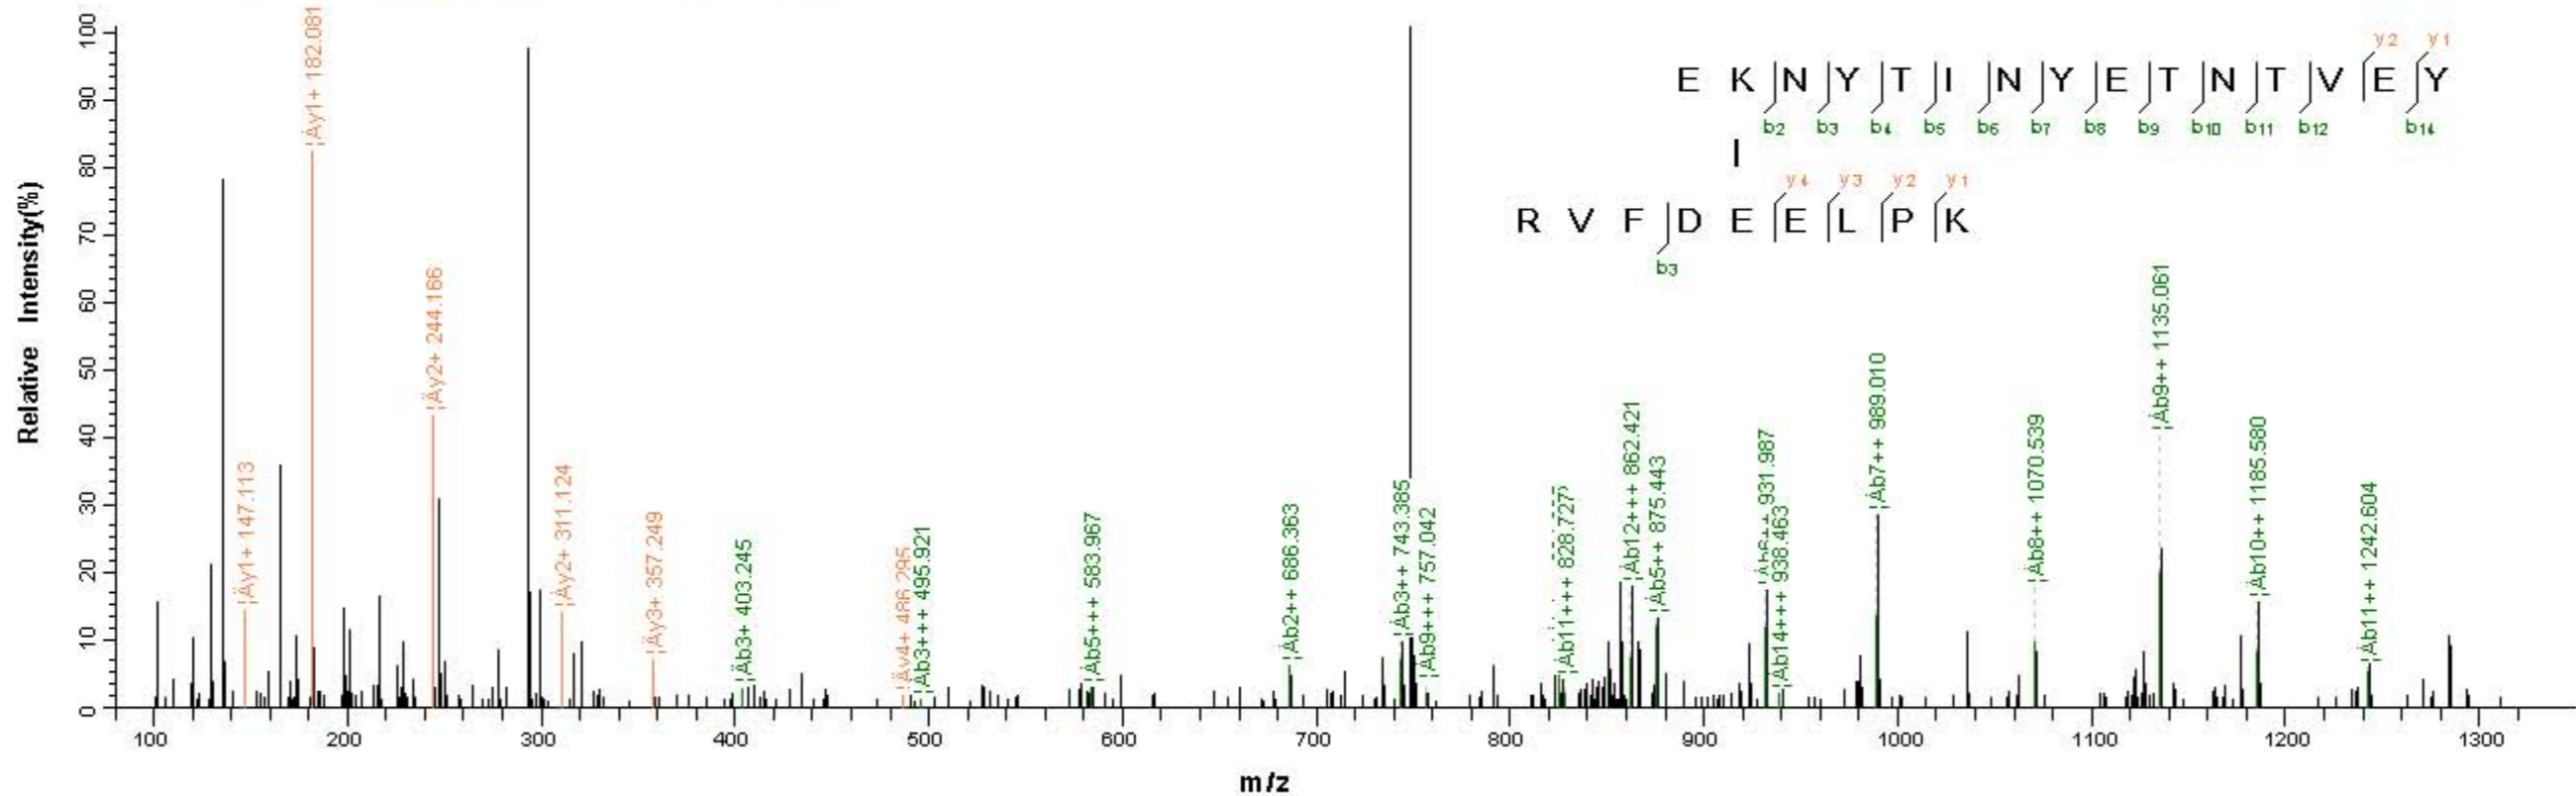

Charge: 5 MH+: 2766.4613 Score: 3.46e-014

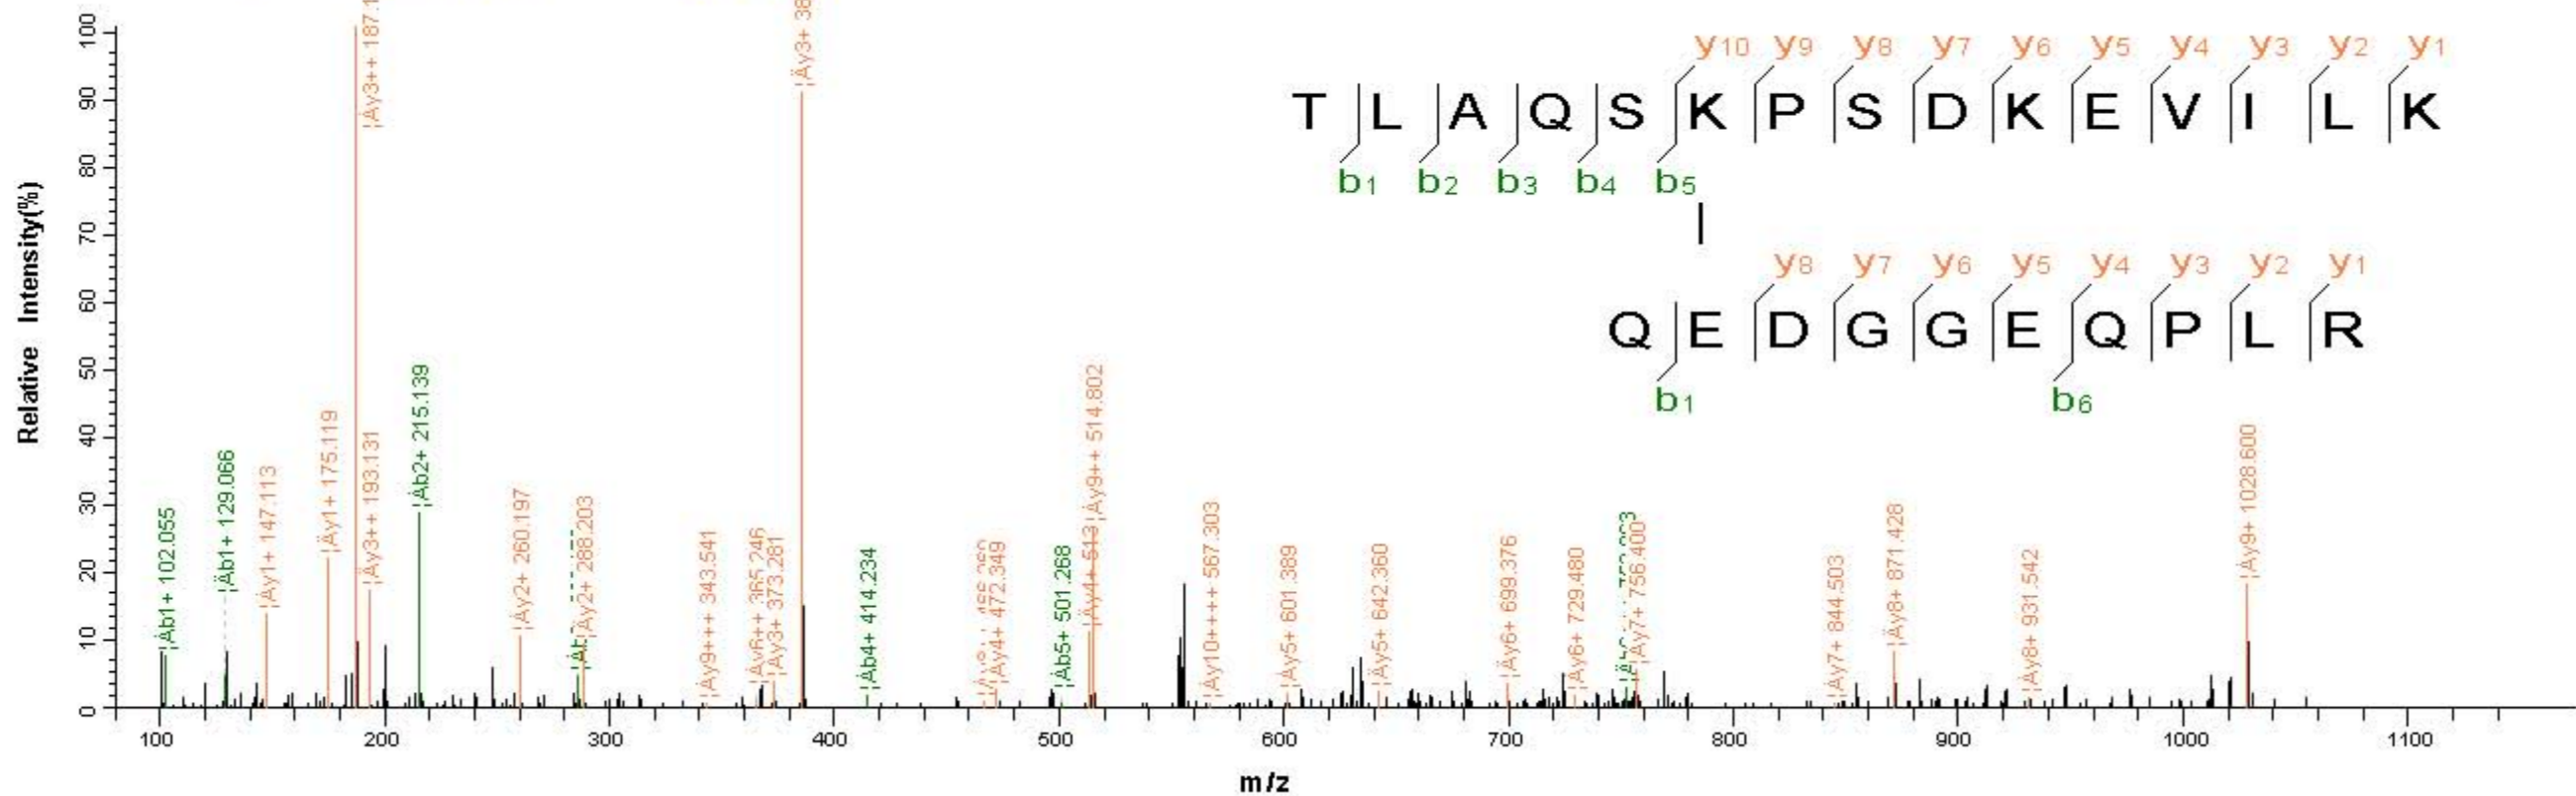

Charge: 4 MH+: 2635.4879 Score: 3.73e-005

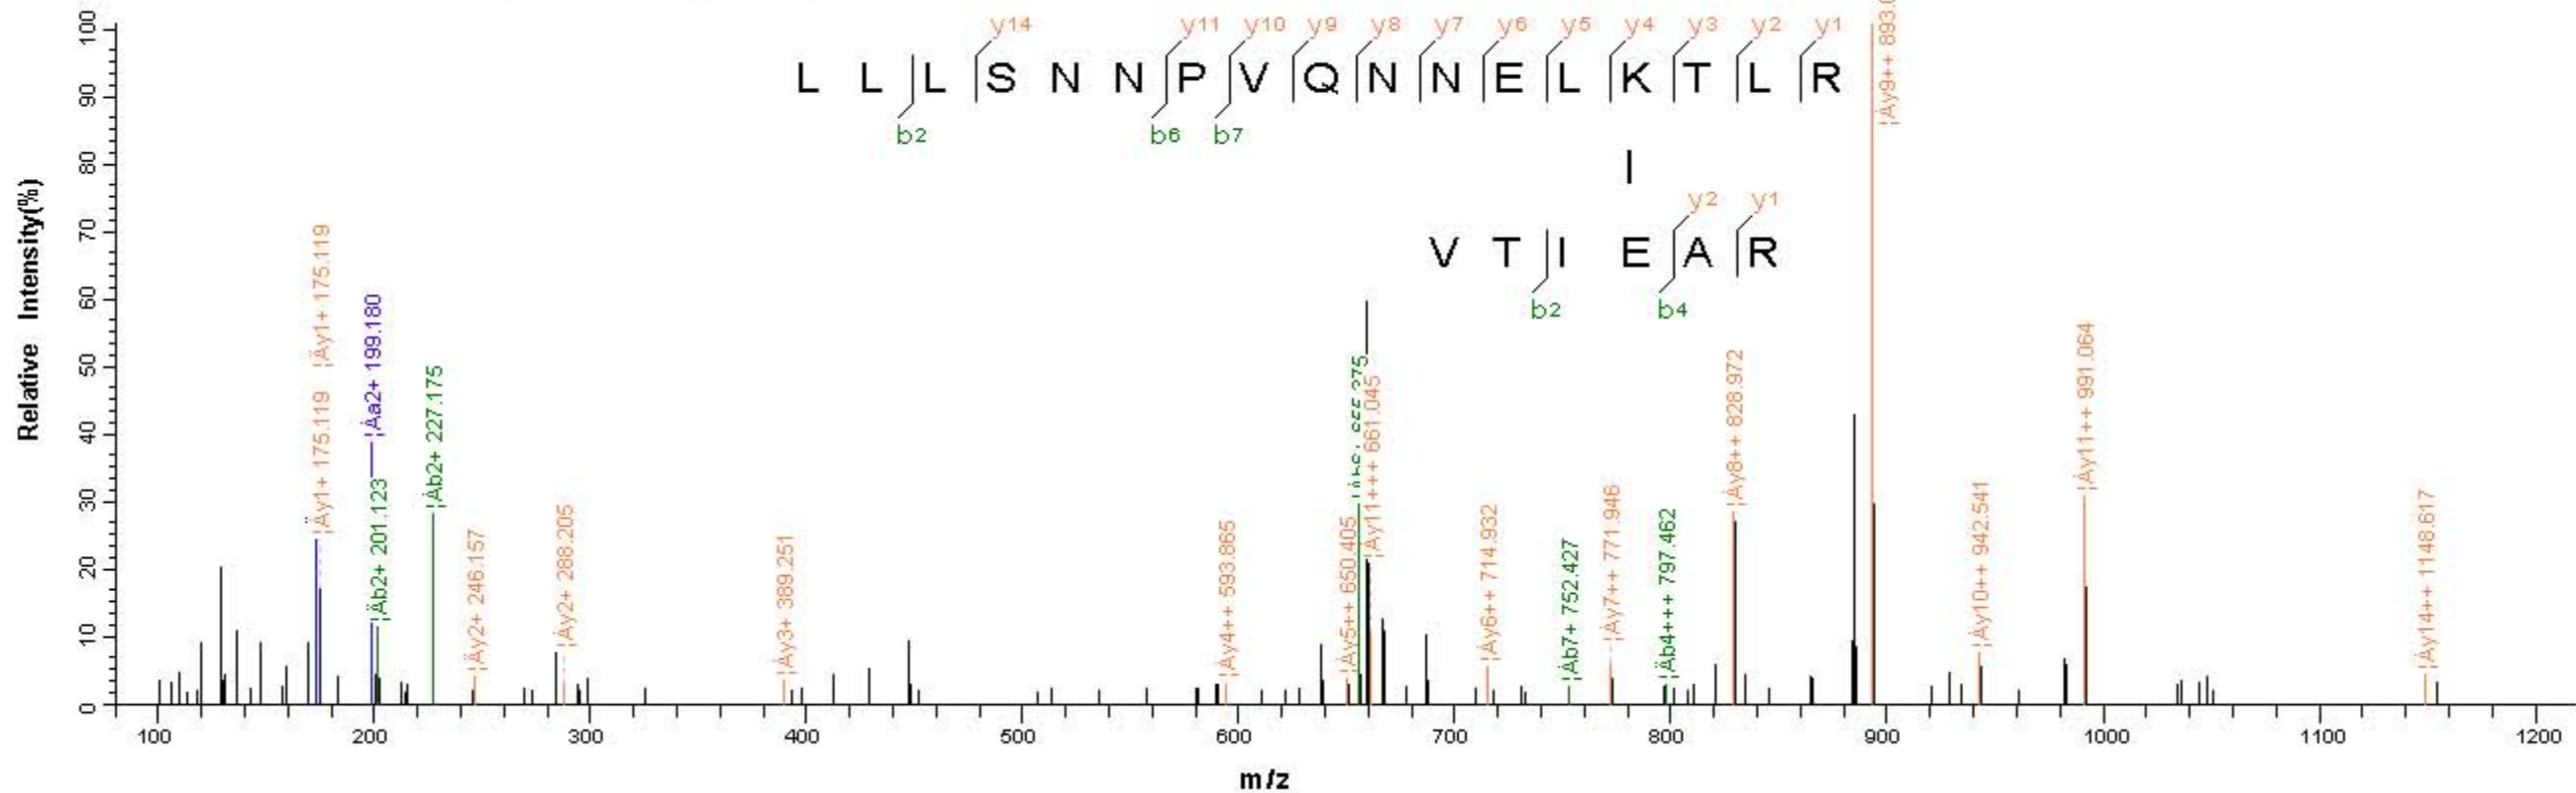

Charge: 4 MH+: 2434.2265 Score: 3.28e-010

Relative Intensity(%)

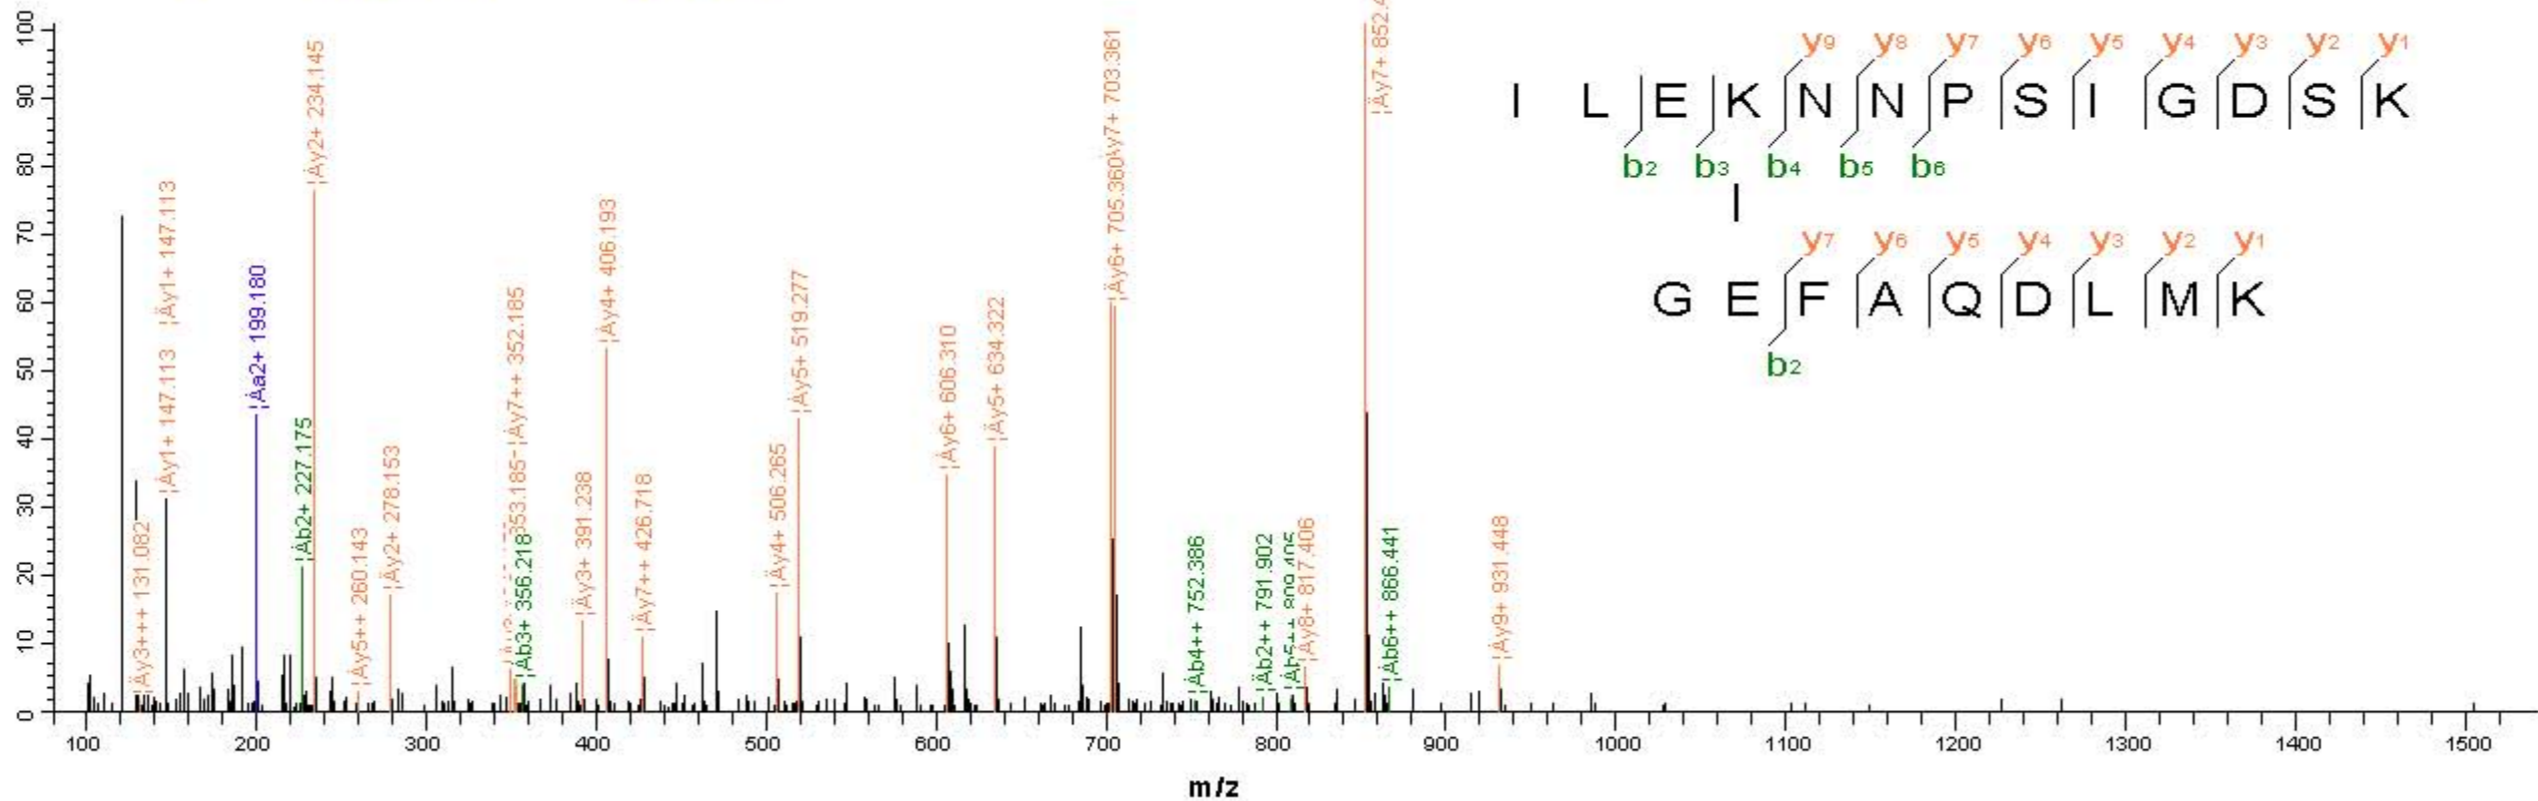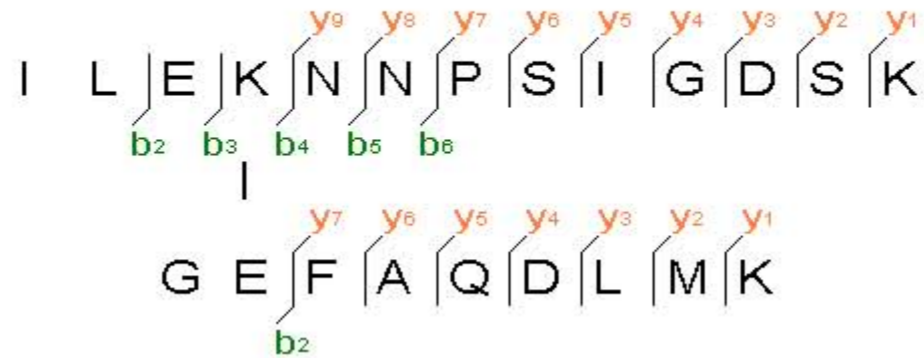

Charge: 4 MH+: 2814.4992 Score: 8.59e-006

N V P T S K W L N S I T S G G L K  
b<sub>1</sub> b<sub>2</sub> b<sub>3</sub> b<sub>6</sub> b<sub>13</sub>

E N T N V L D V K  
b<sub>1</sub> b<sub>3</sub> b<sub>4</sub> b<sub>5</sub> b<sub>6</sub> b<sub>7</sub>

Relative Intensity(%)

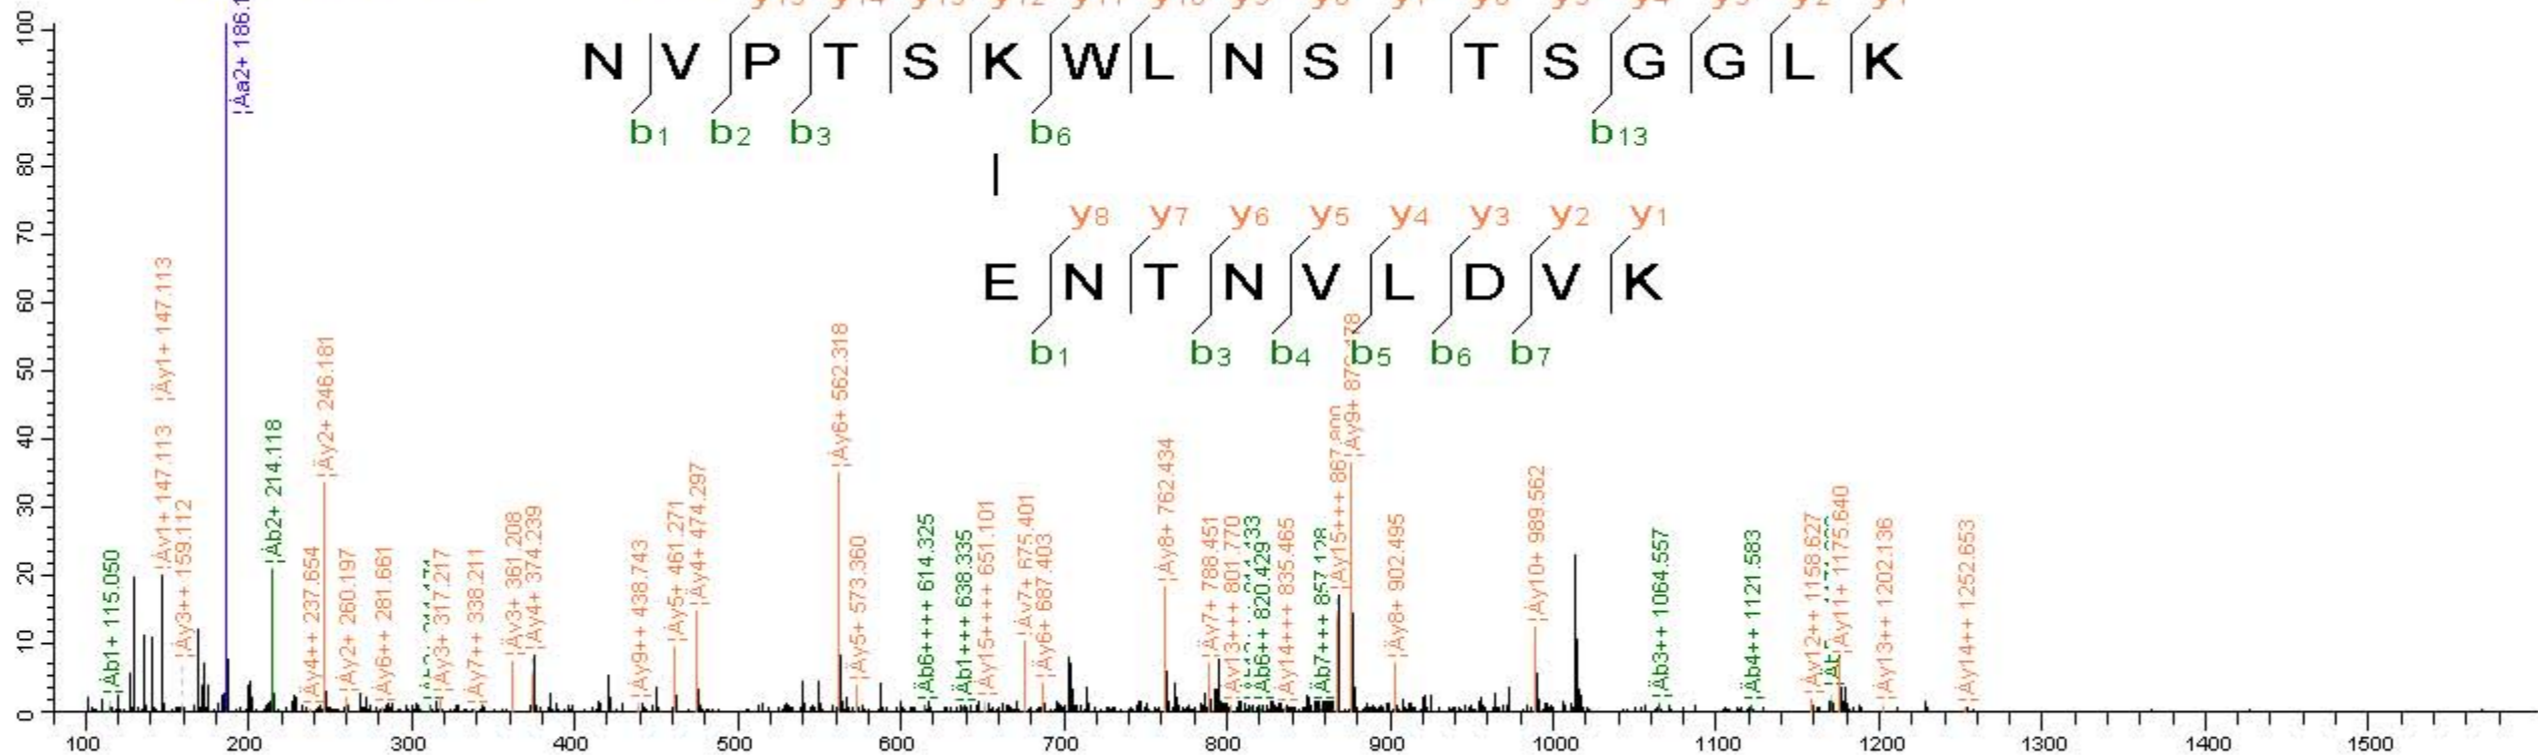

m/z

Charge: 4    MH+: 3680.8935    Score: 4.43e-010

y21 y20 y19 y18 y17 y16 y15 y14 y13 y12 y11 y10 y9 y8 y7 y6 y5 y4 y3 y2 y1  
b2 b3 b4 b5 b6 b7 b8 b9 b10 b11 b12 b13 b14 b15 b16 b17

y9 y7 y6 y5 y4 y3 y2 y1  
b2 b6 b9

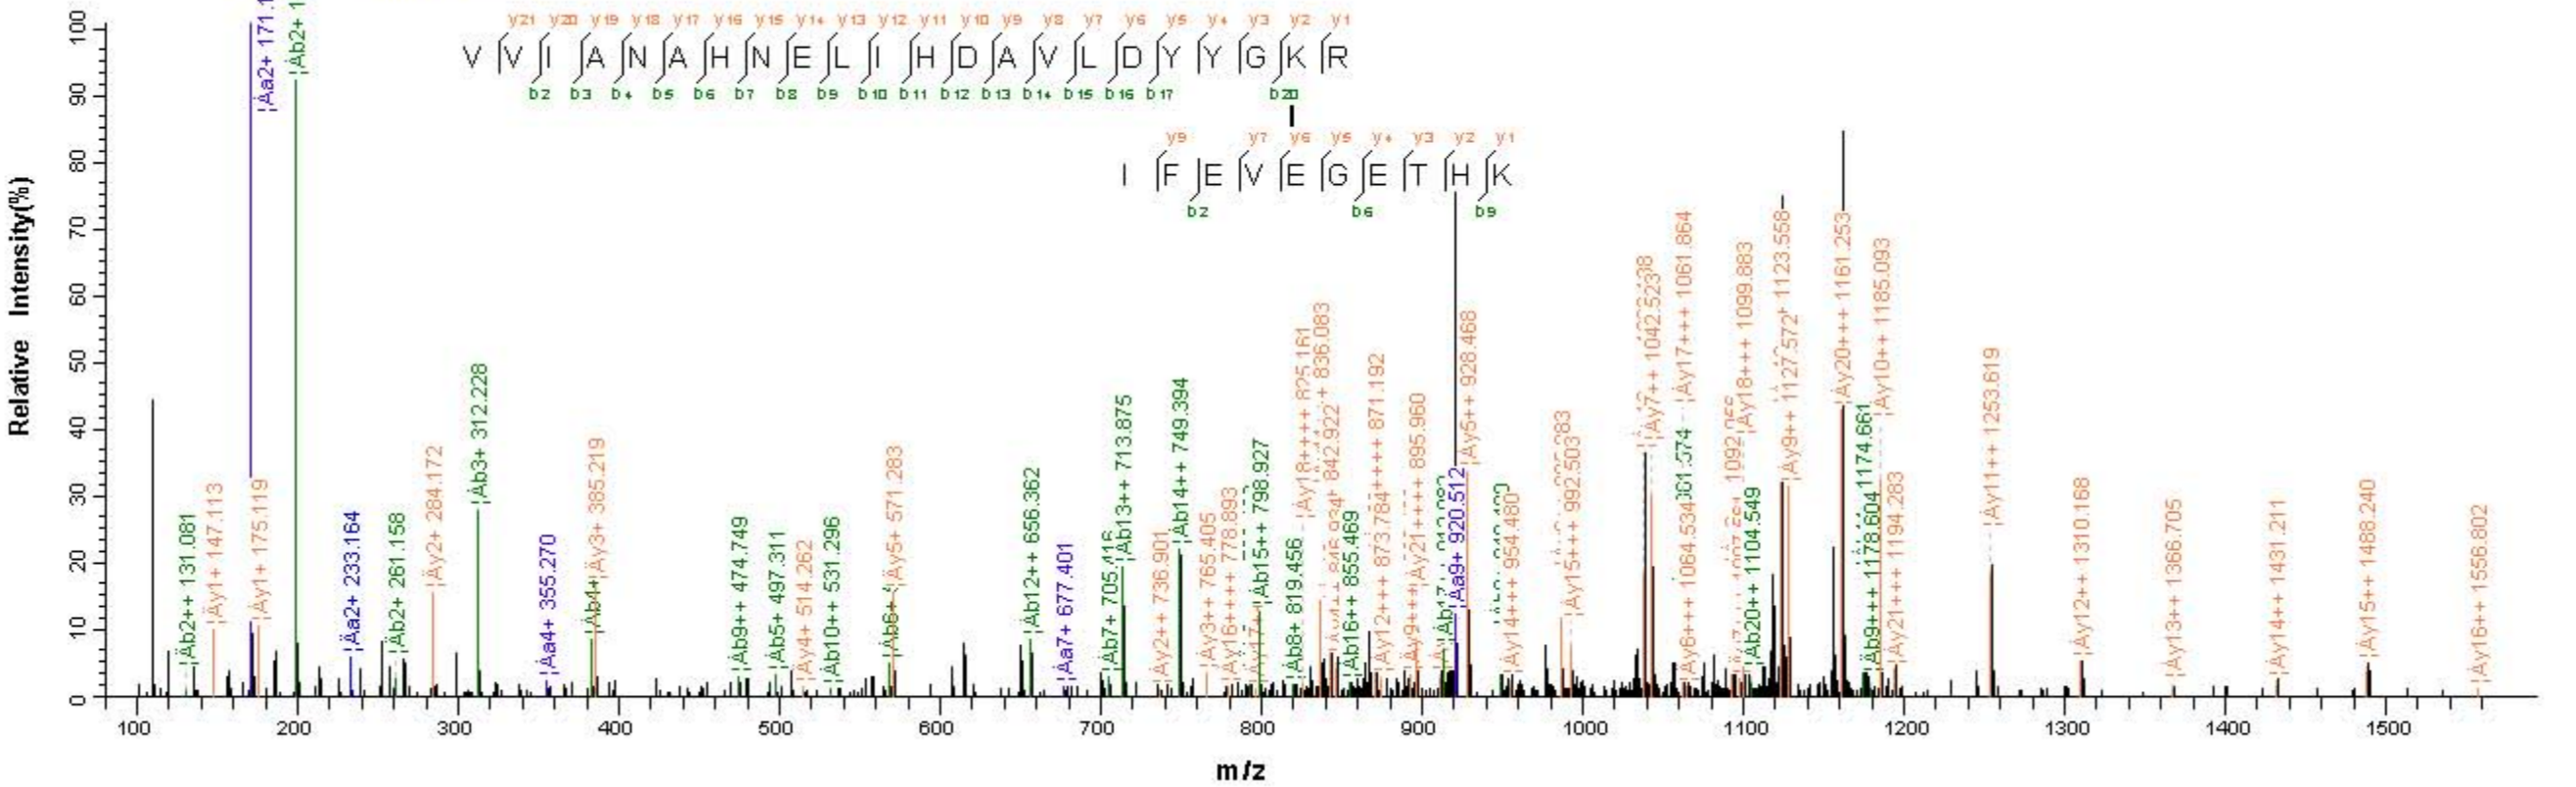



Charge: 4 MH+: 3436.7240 Score: 3.74e-005

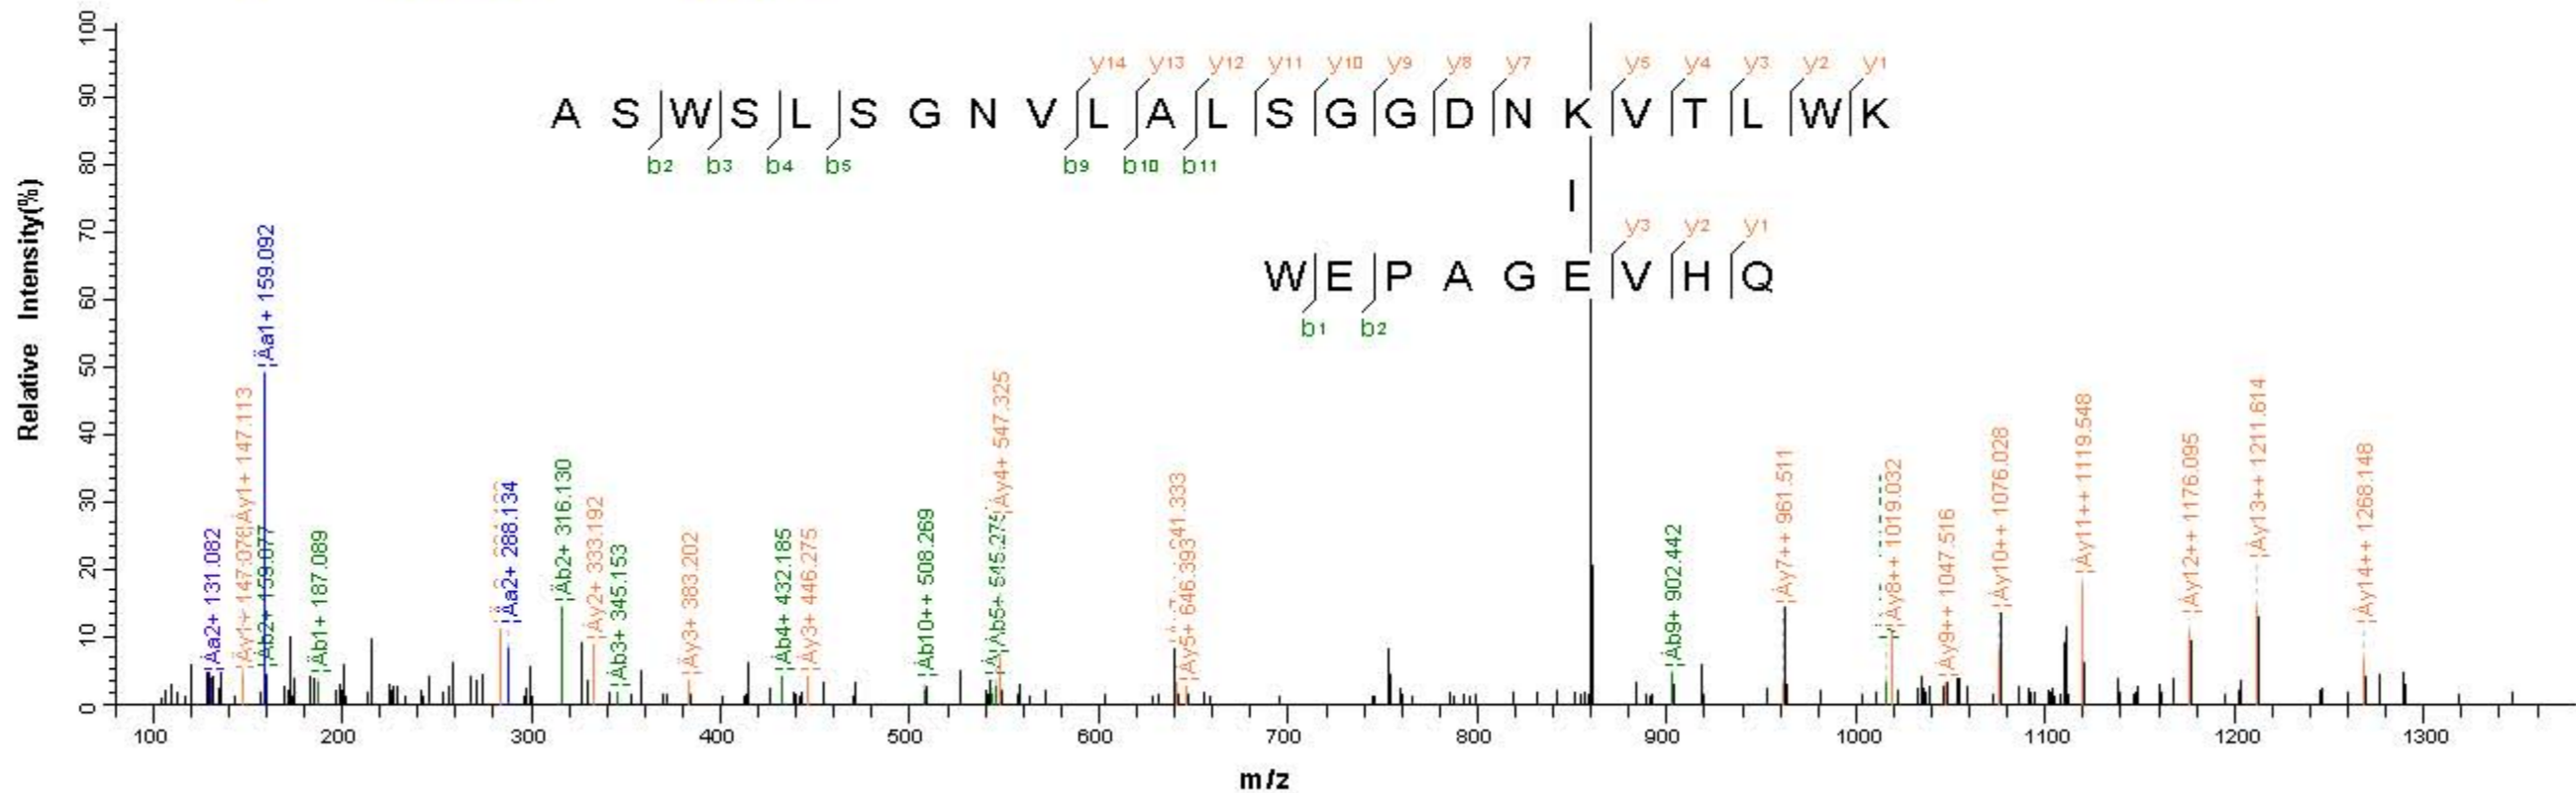

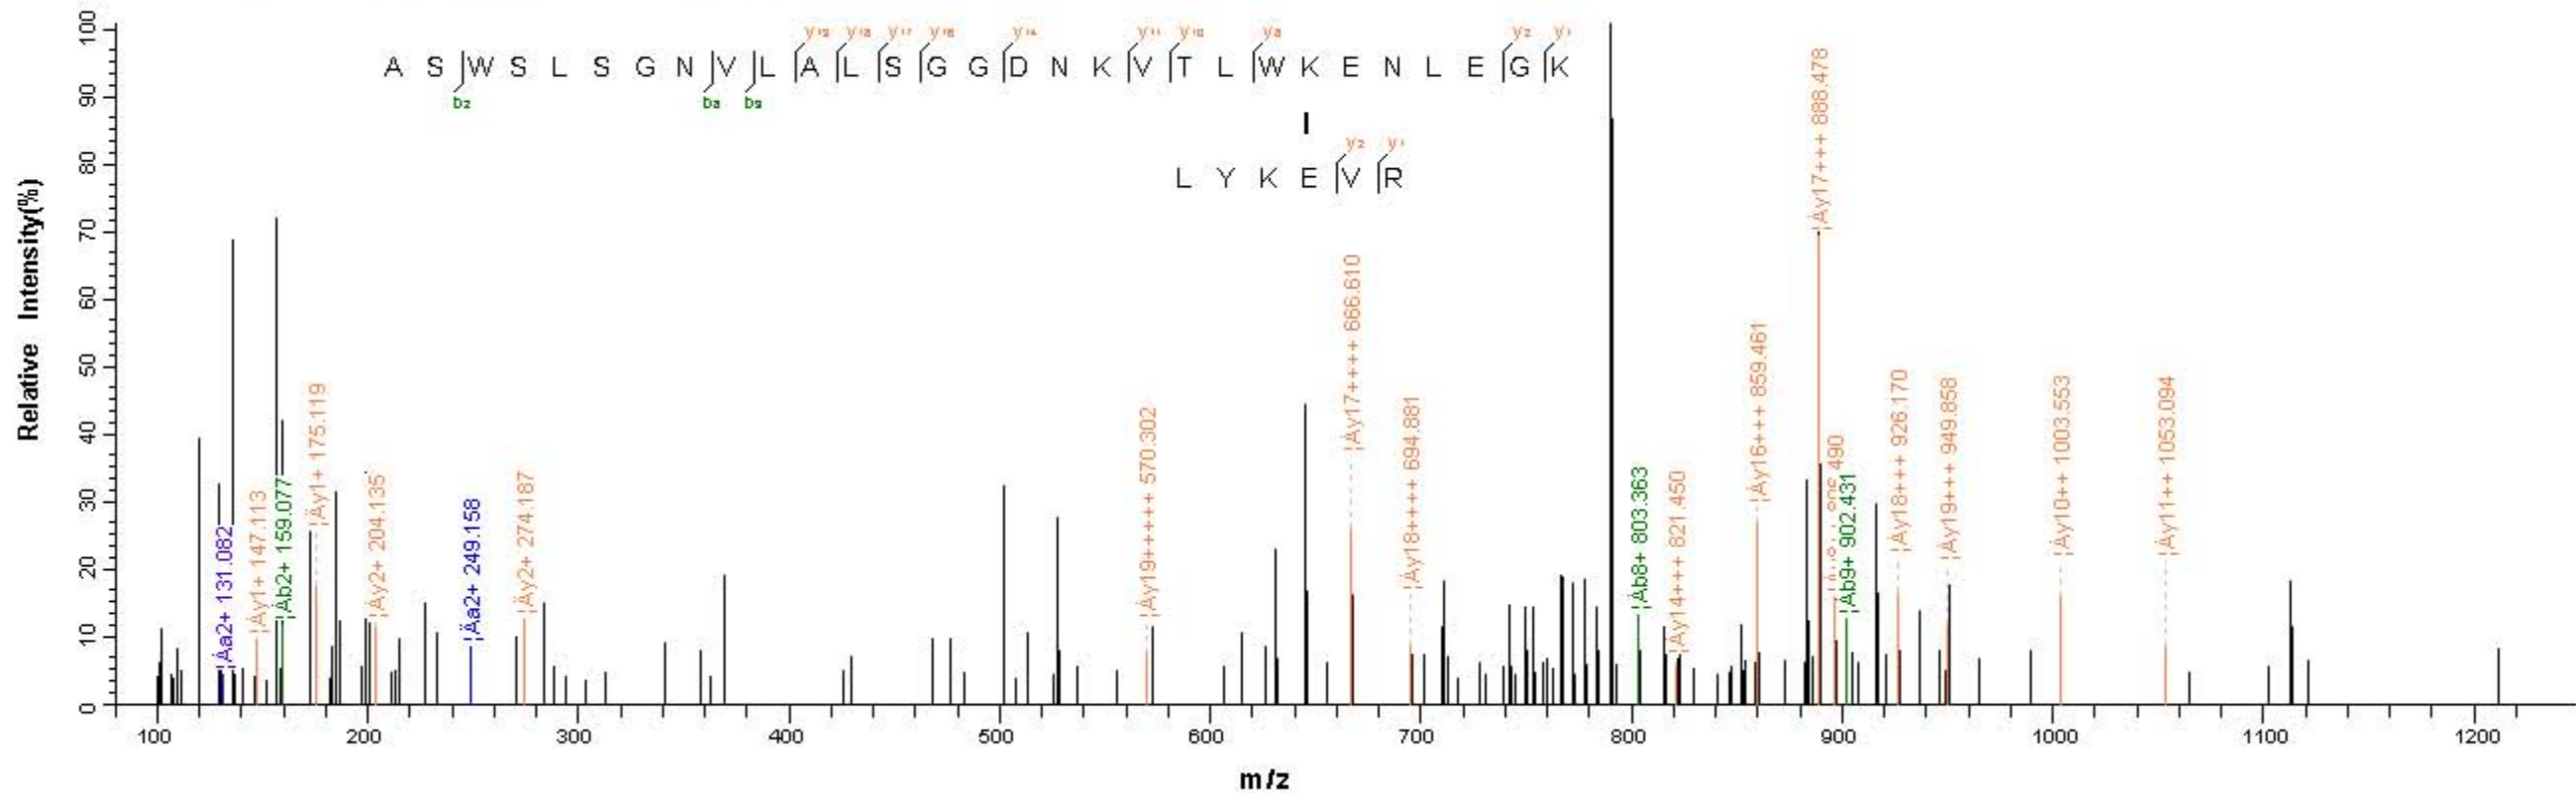

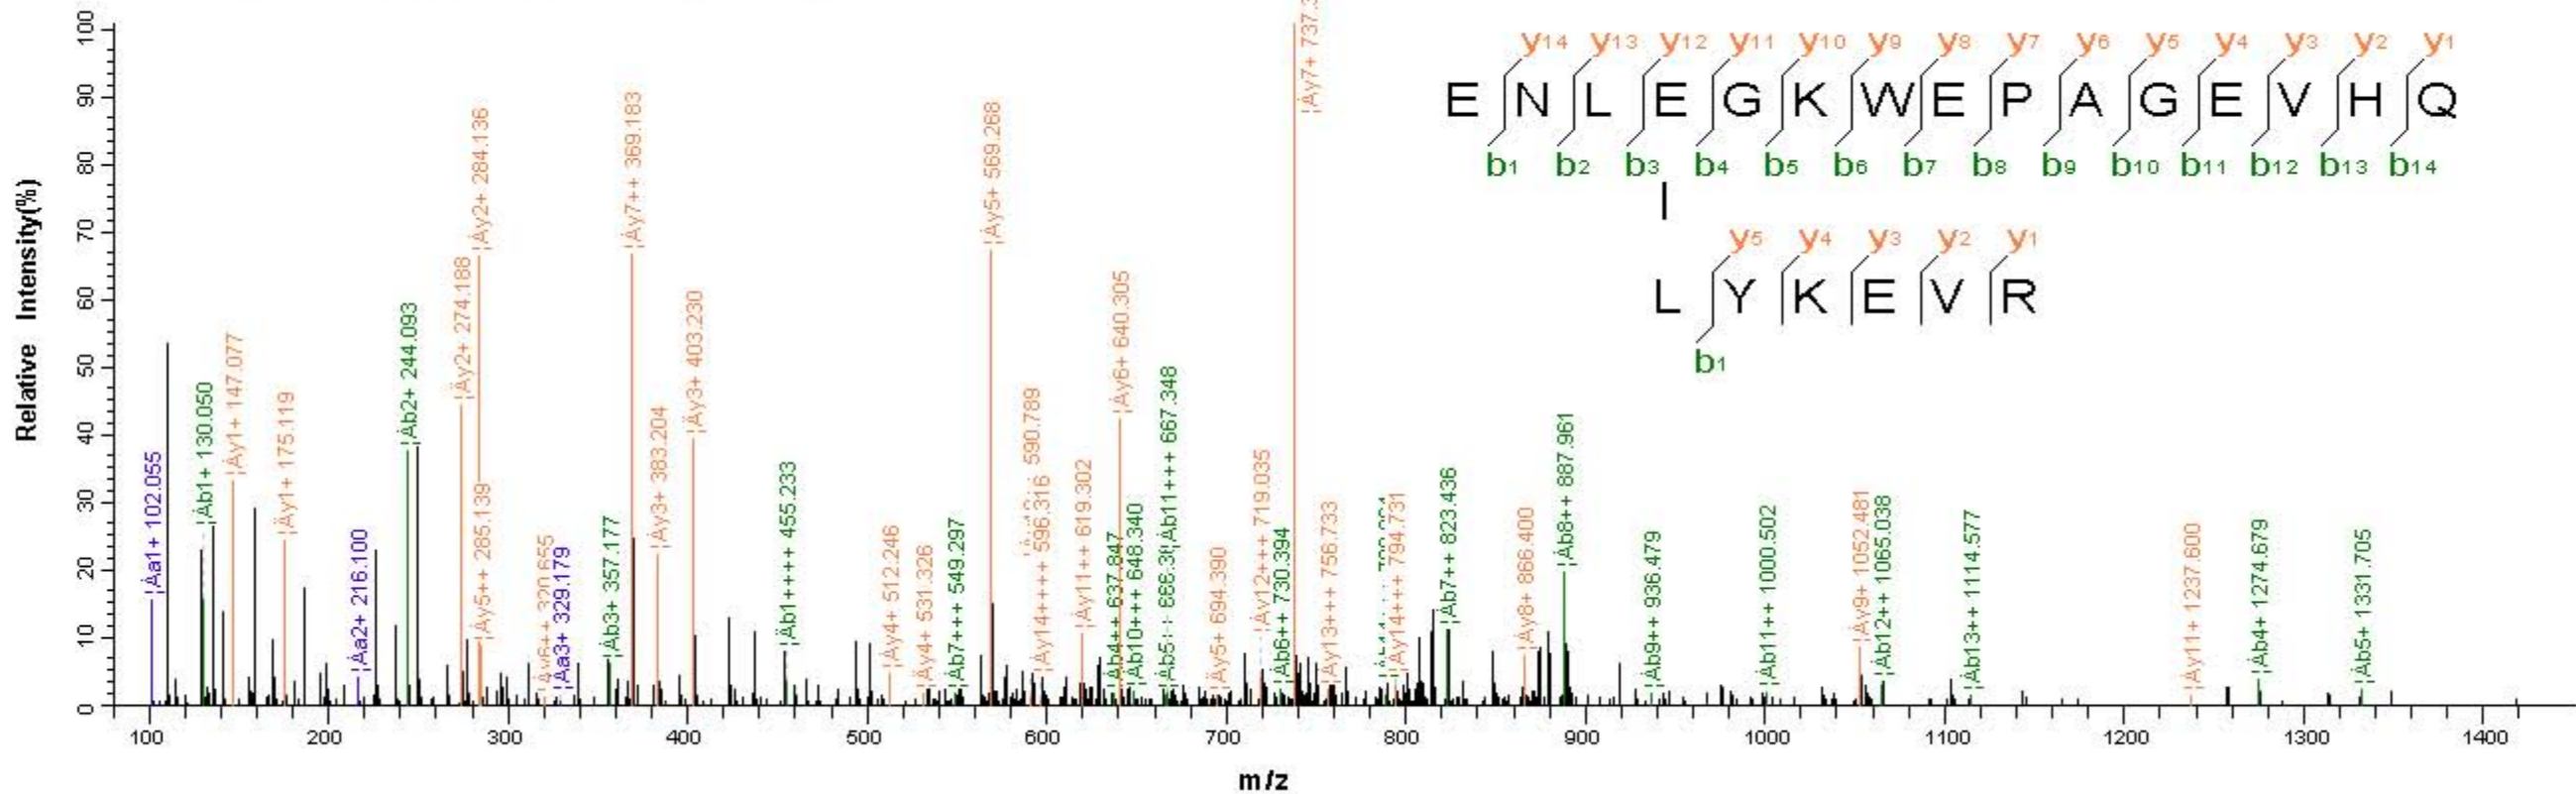

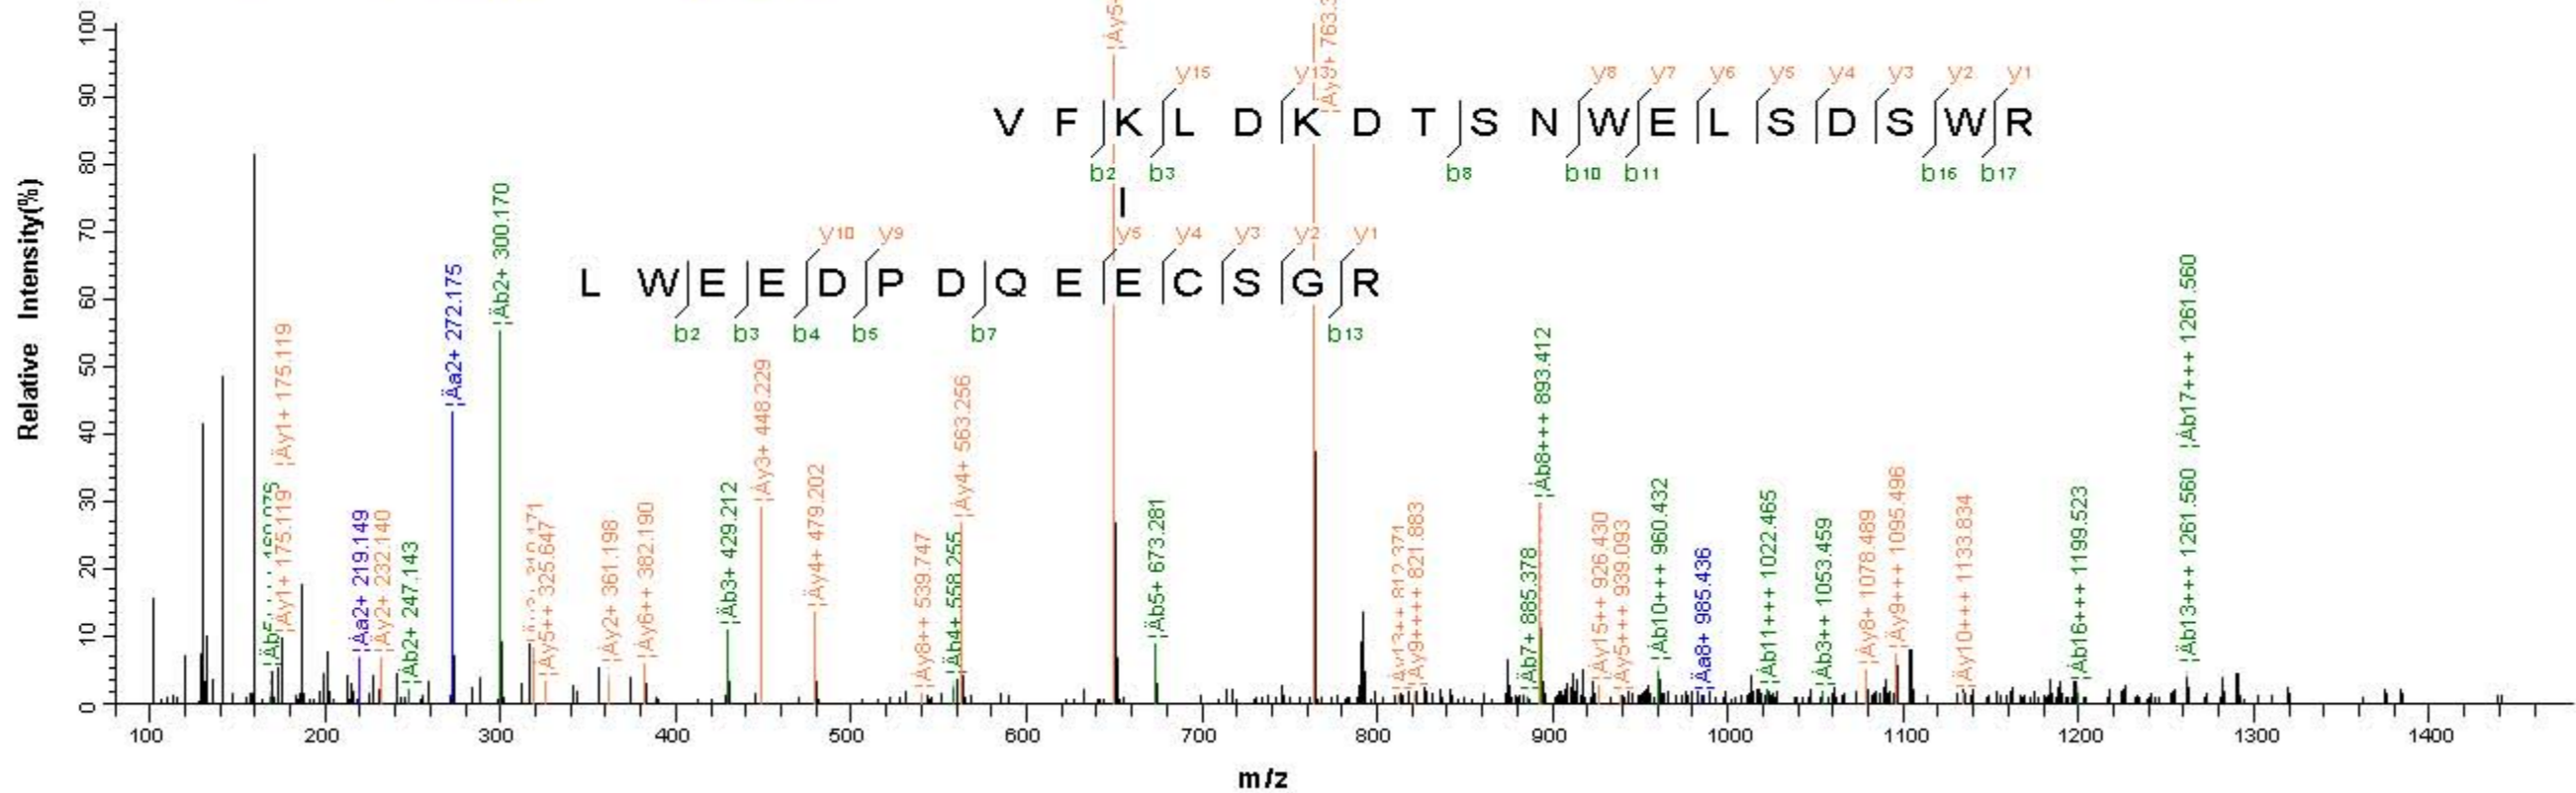

Charge: 5 MH+: 3489.7853 Score: 3.98e-012

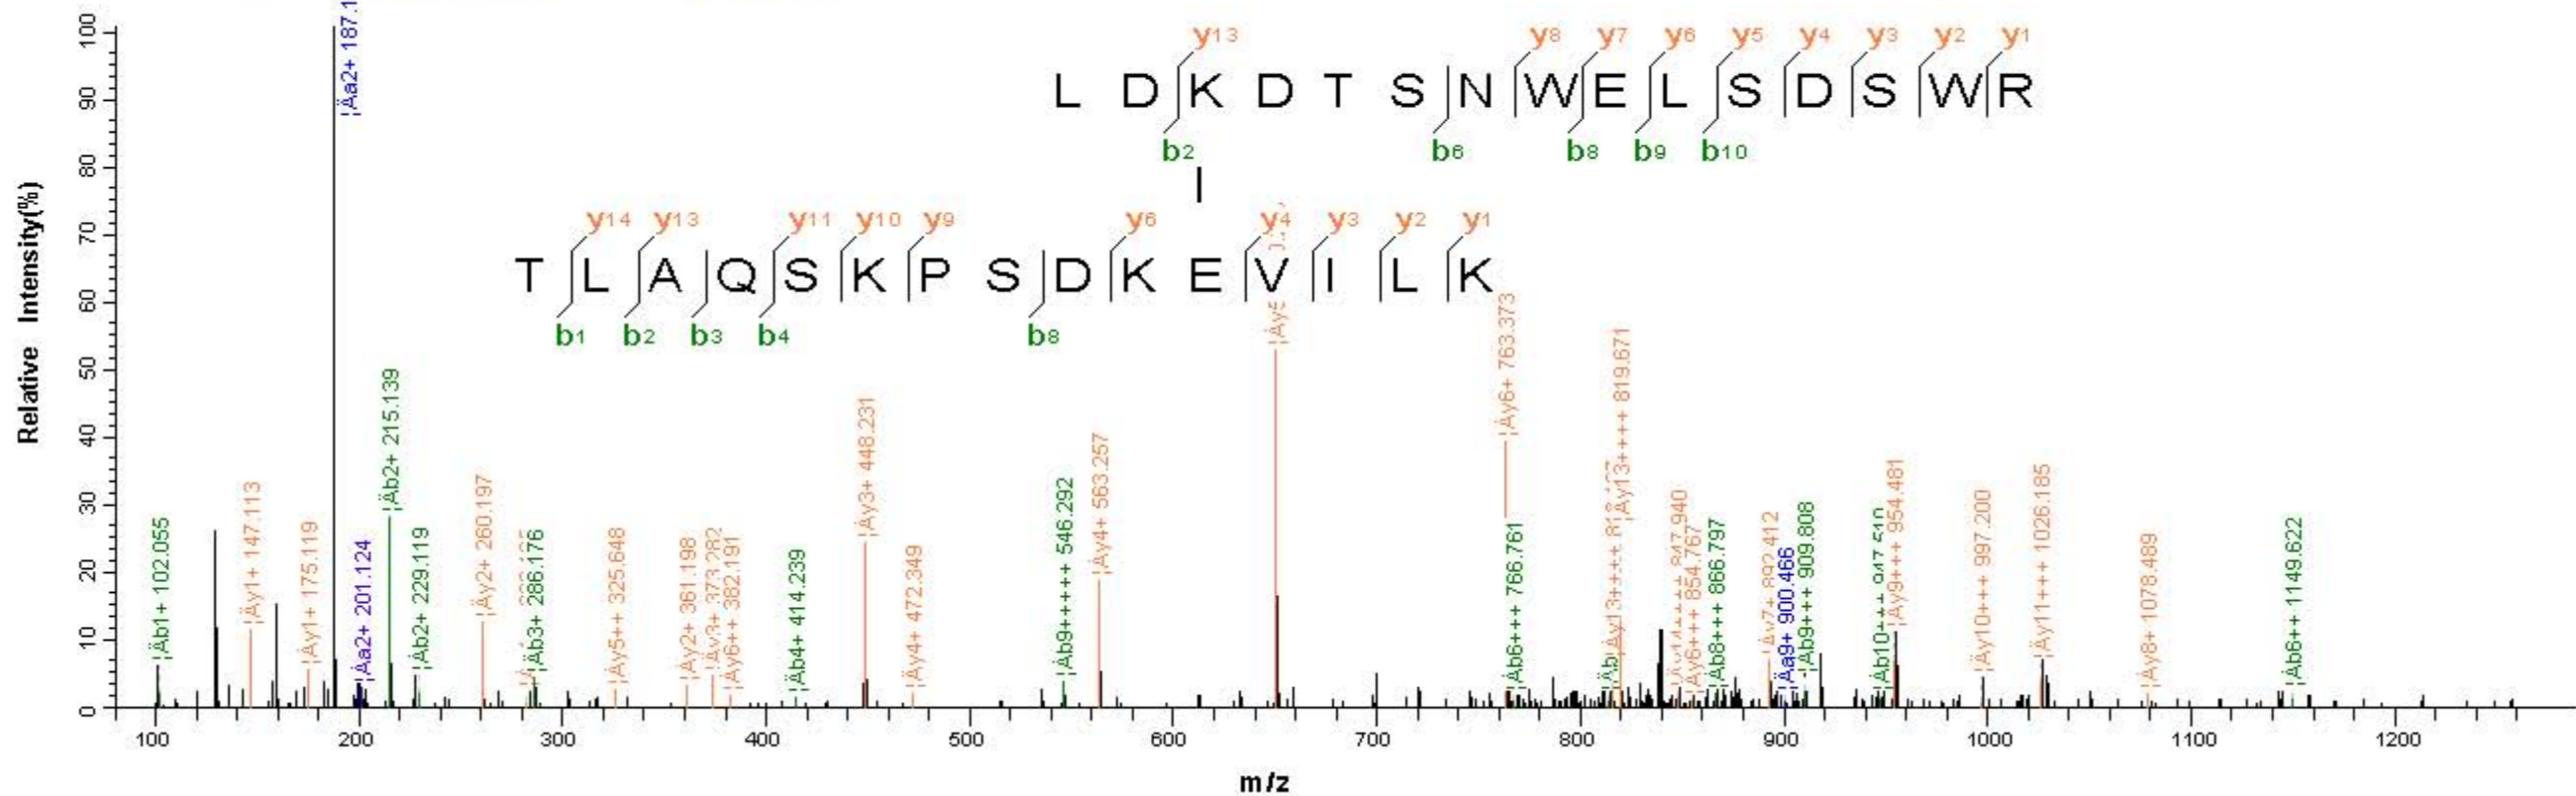

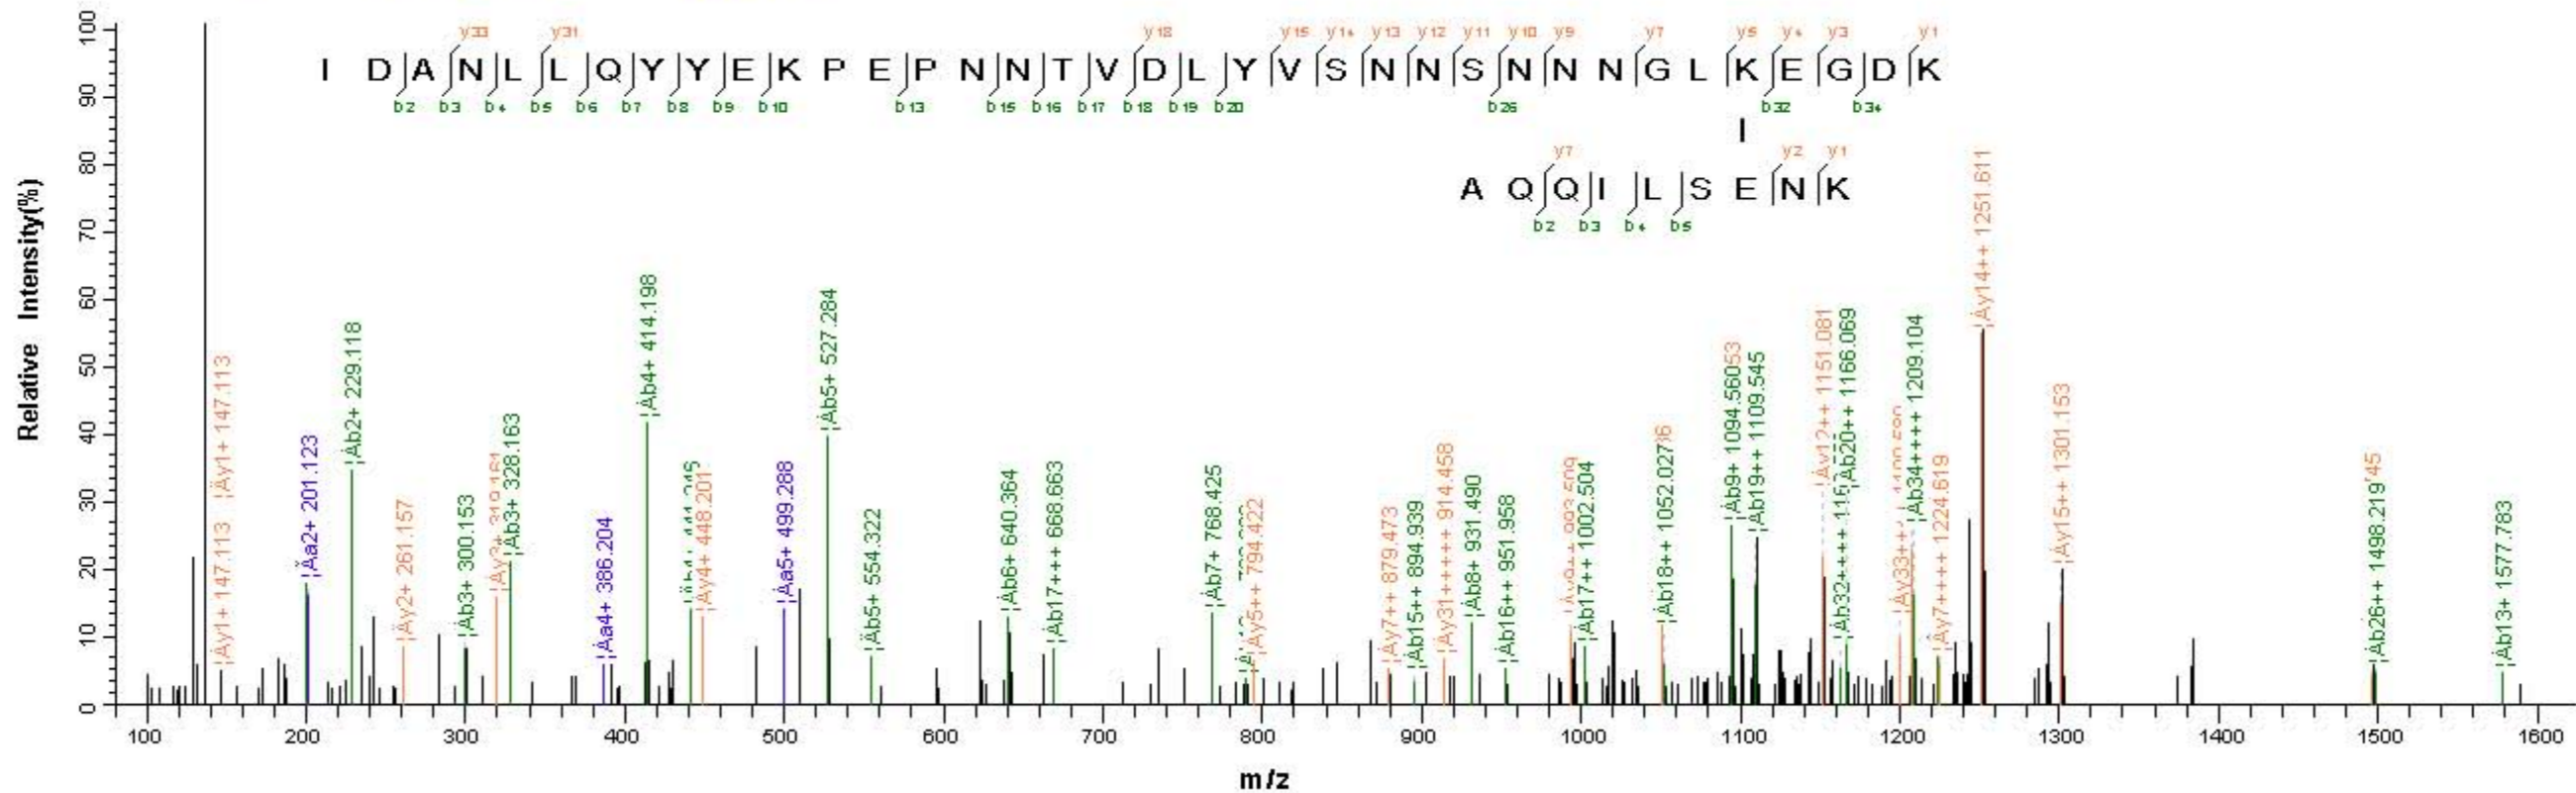

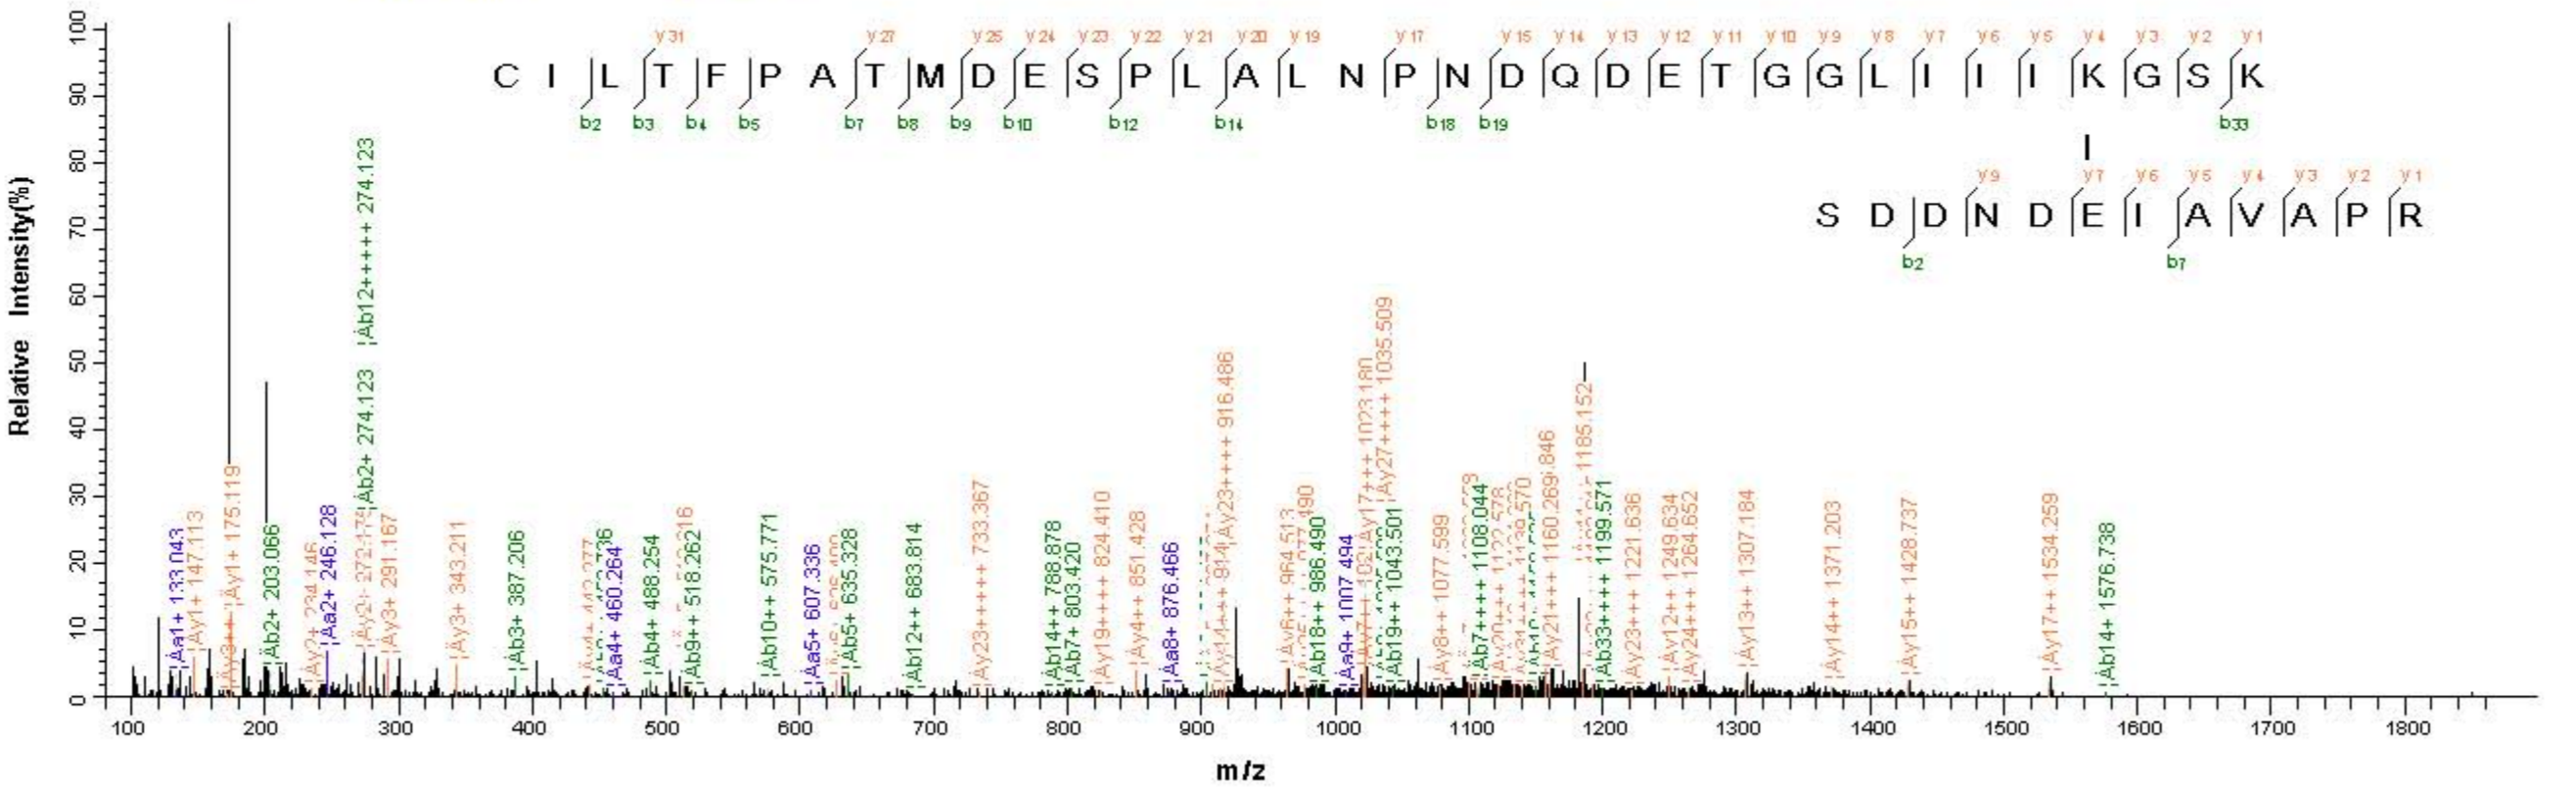

Charge: 5 MH+: 3745.8714 Score: 1.35e-002

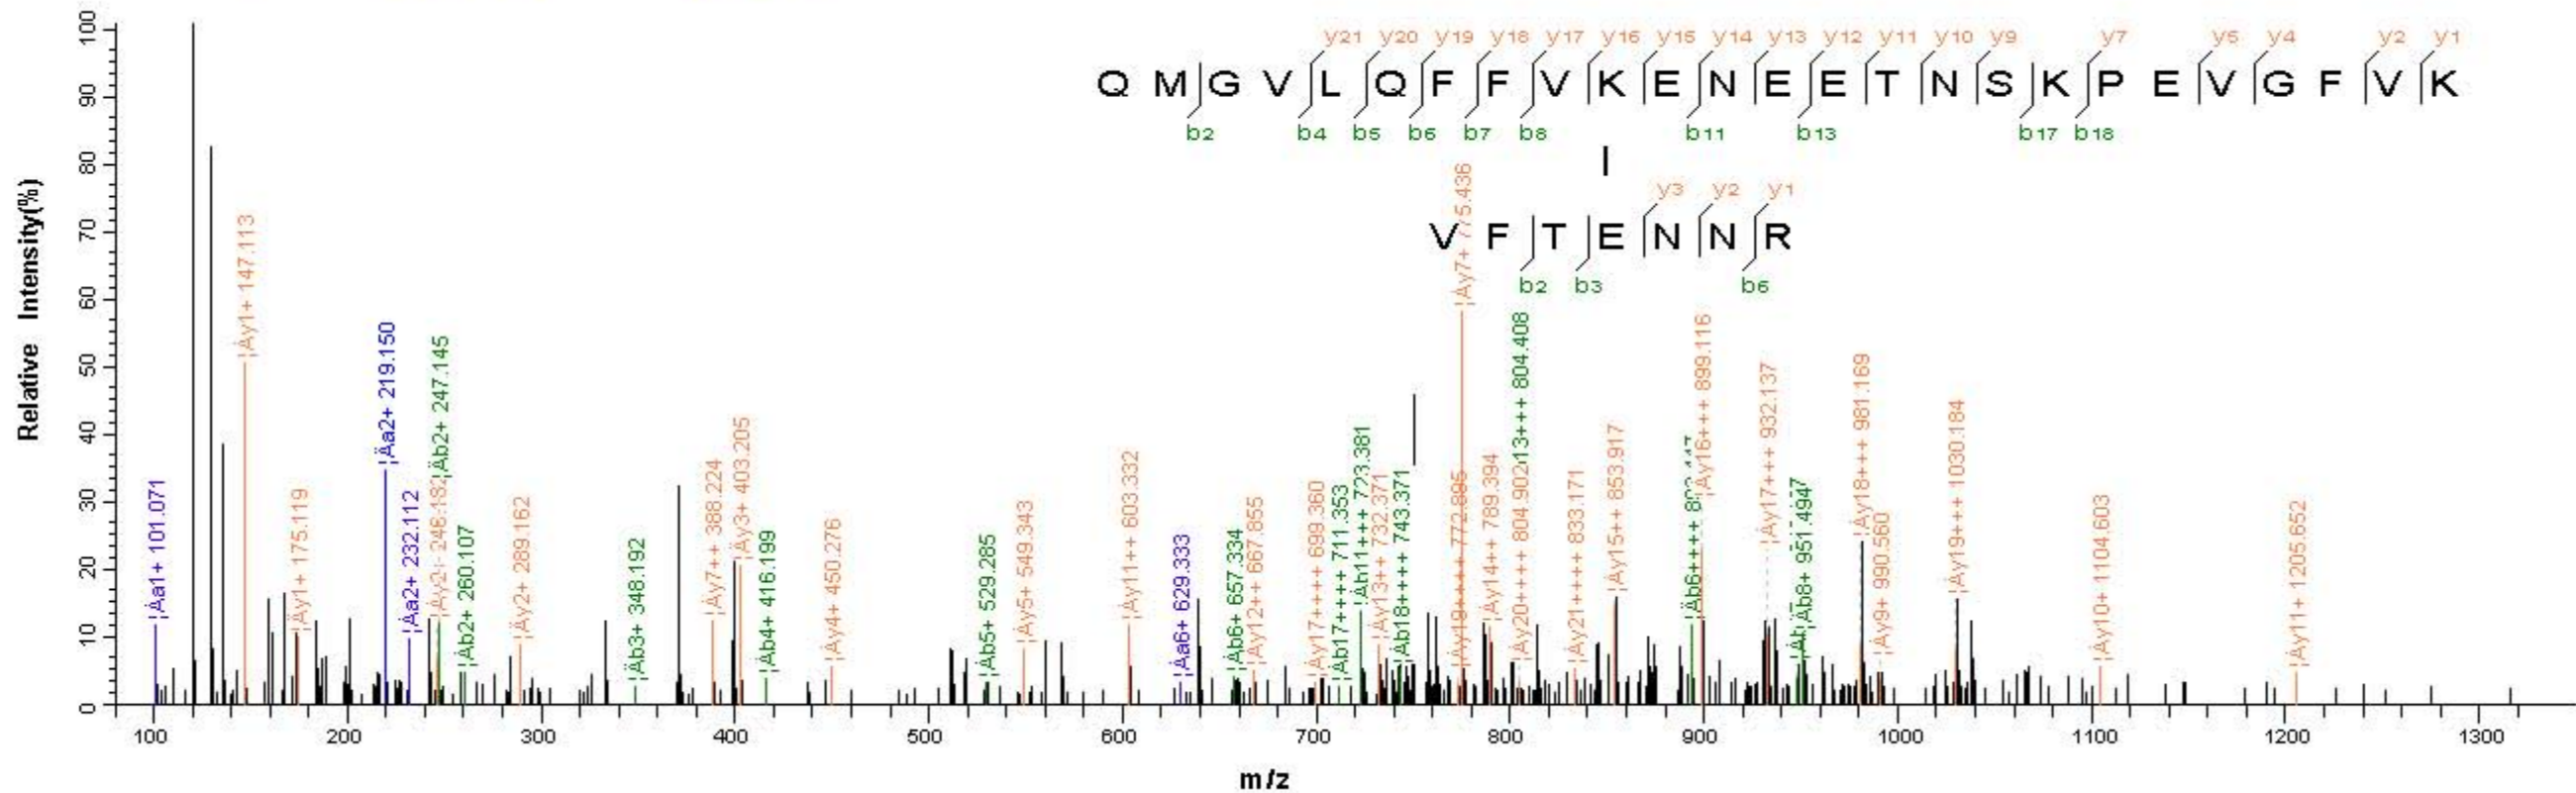



Charge: 5 MH+: 4216.1638 Score: 1.19e-002

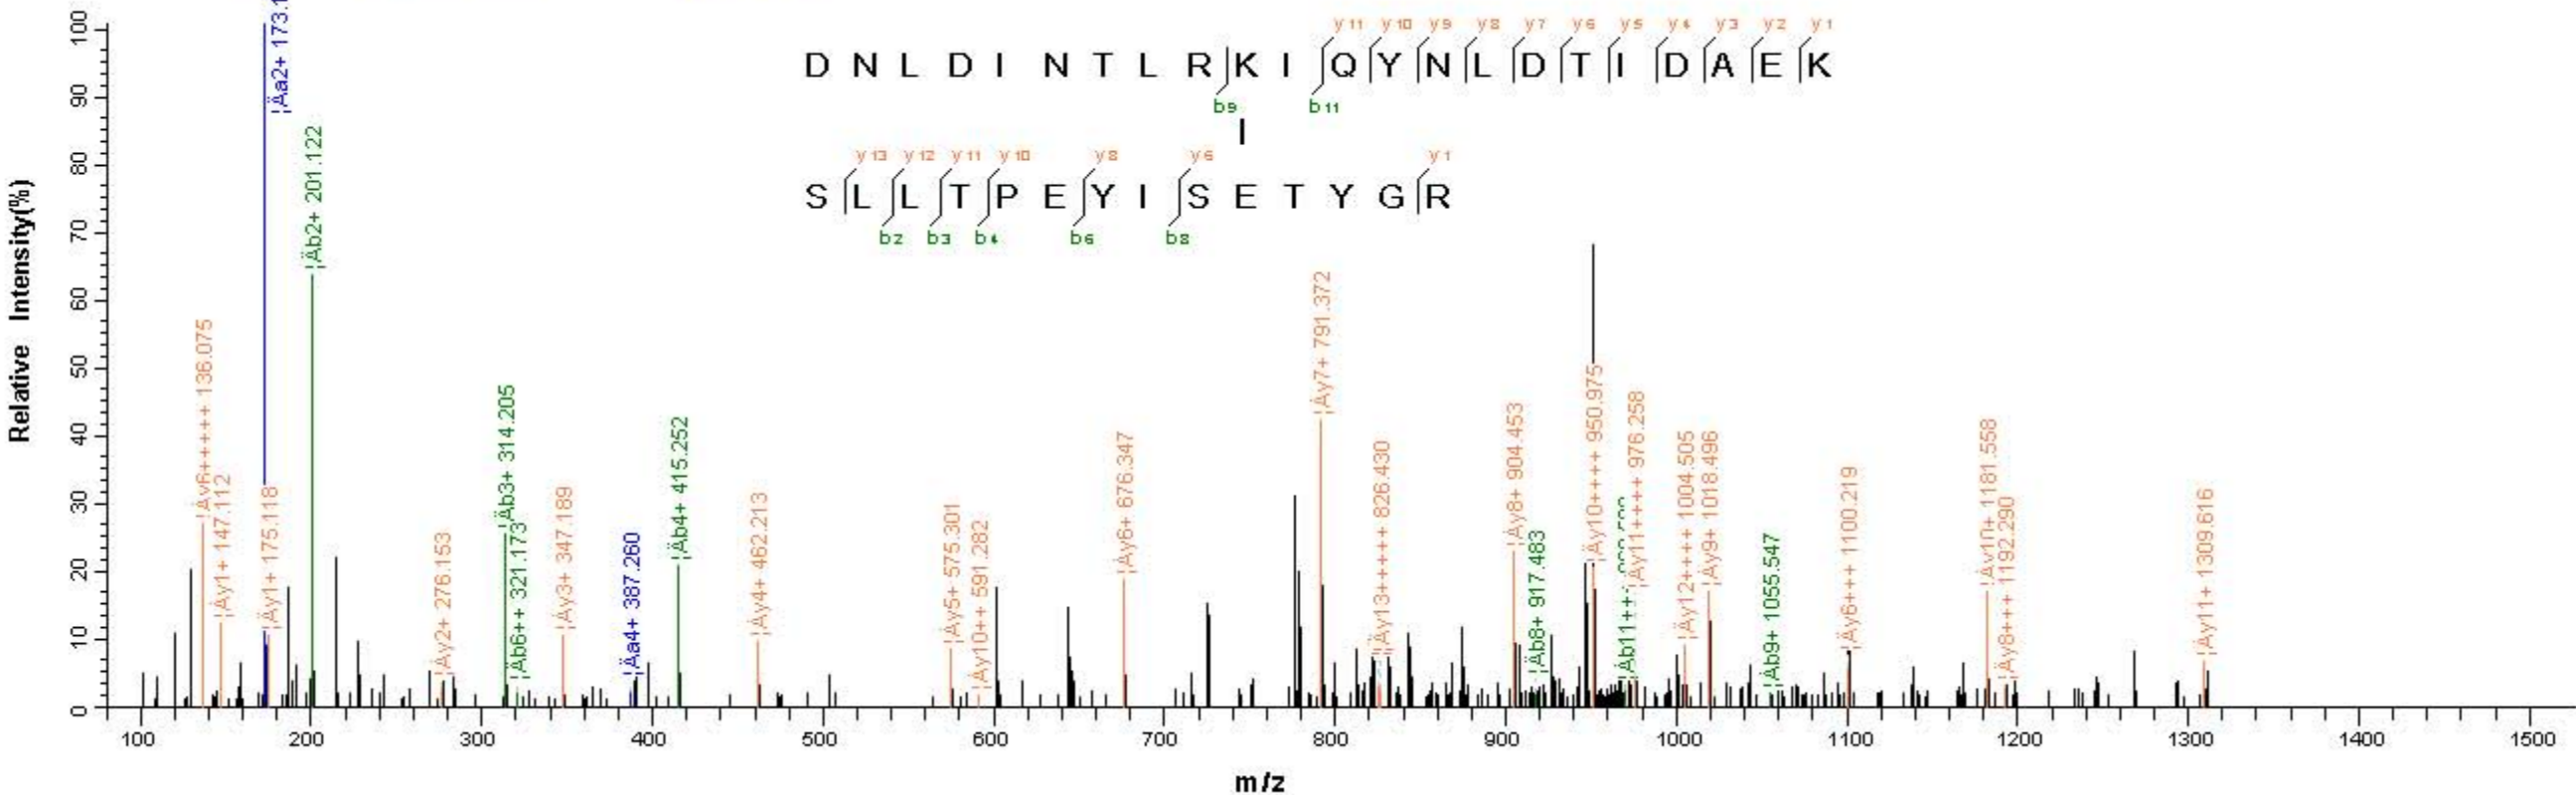

Charge: 5 MH+: 2929.5826 Score: 6.86e-007

Relative Intensity(%)

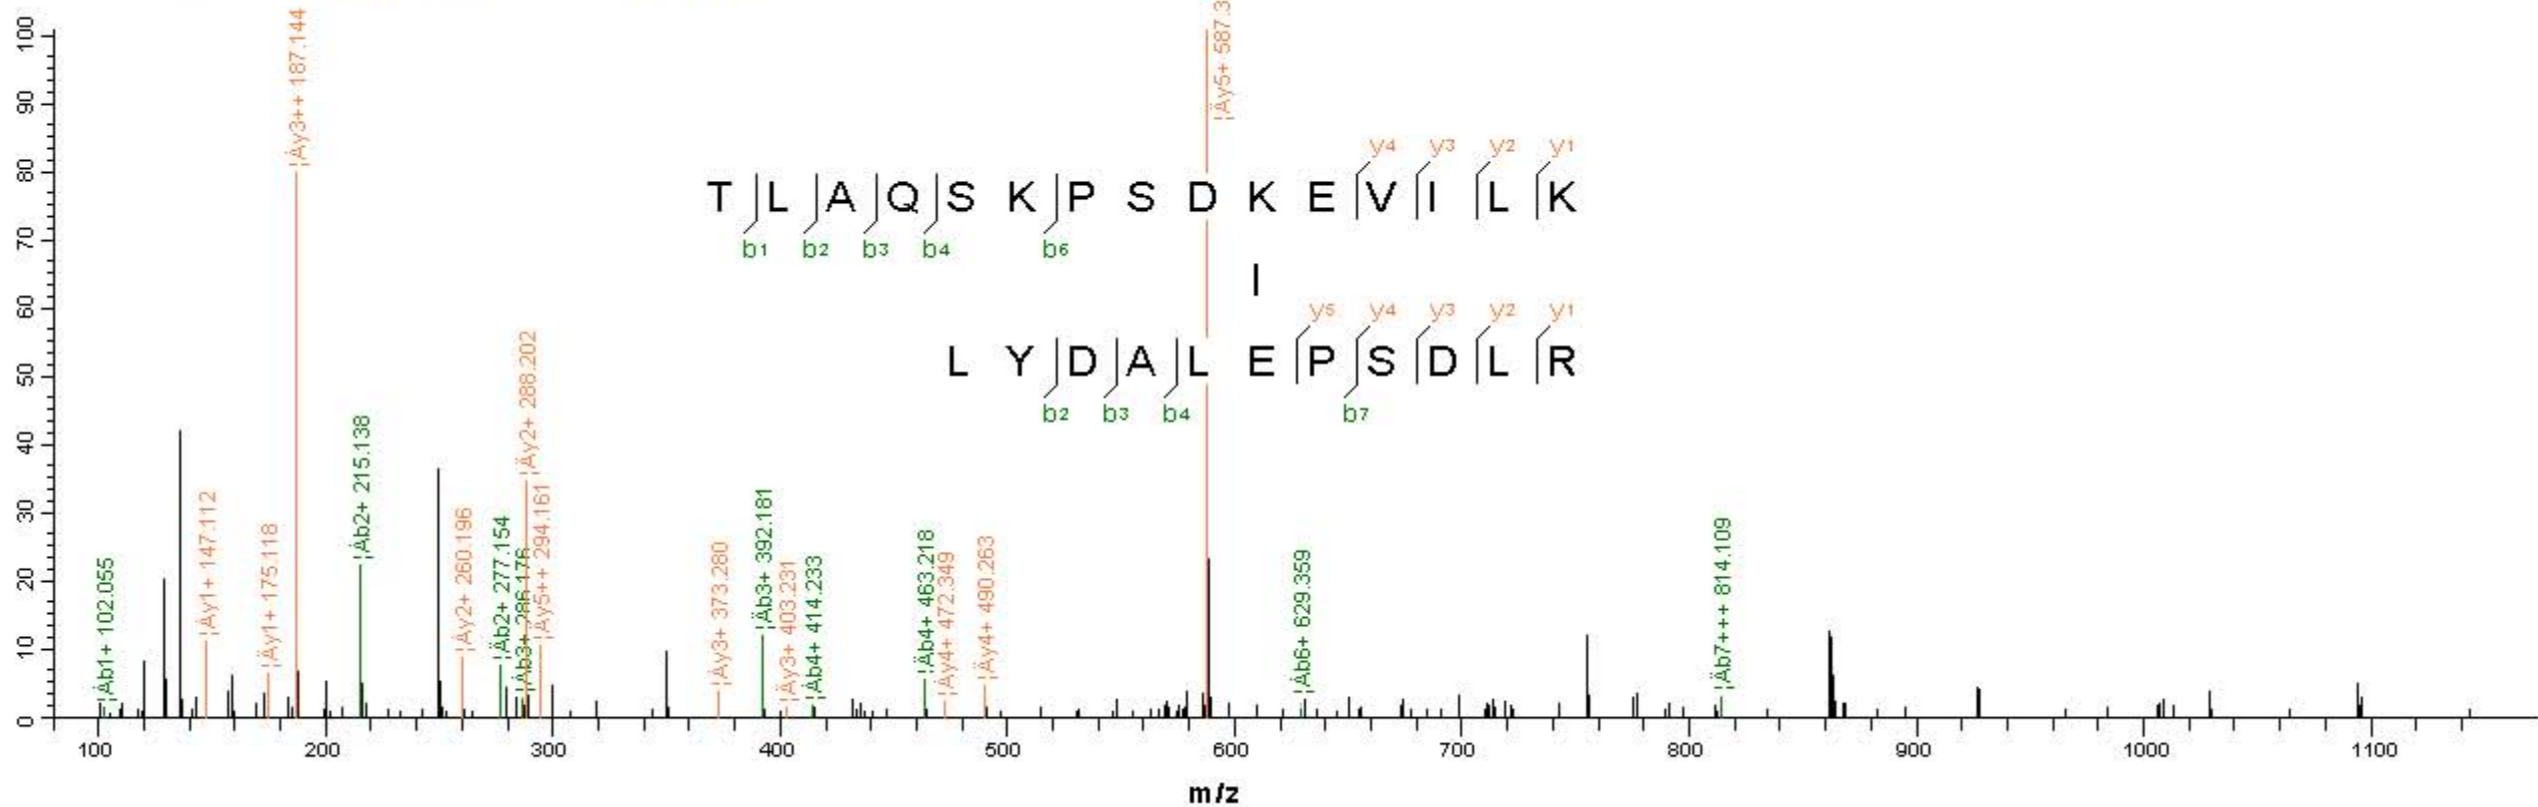

Charge: 4 MH+: 4167.0900 Score: 2.01e-014

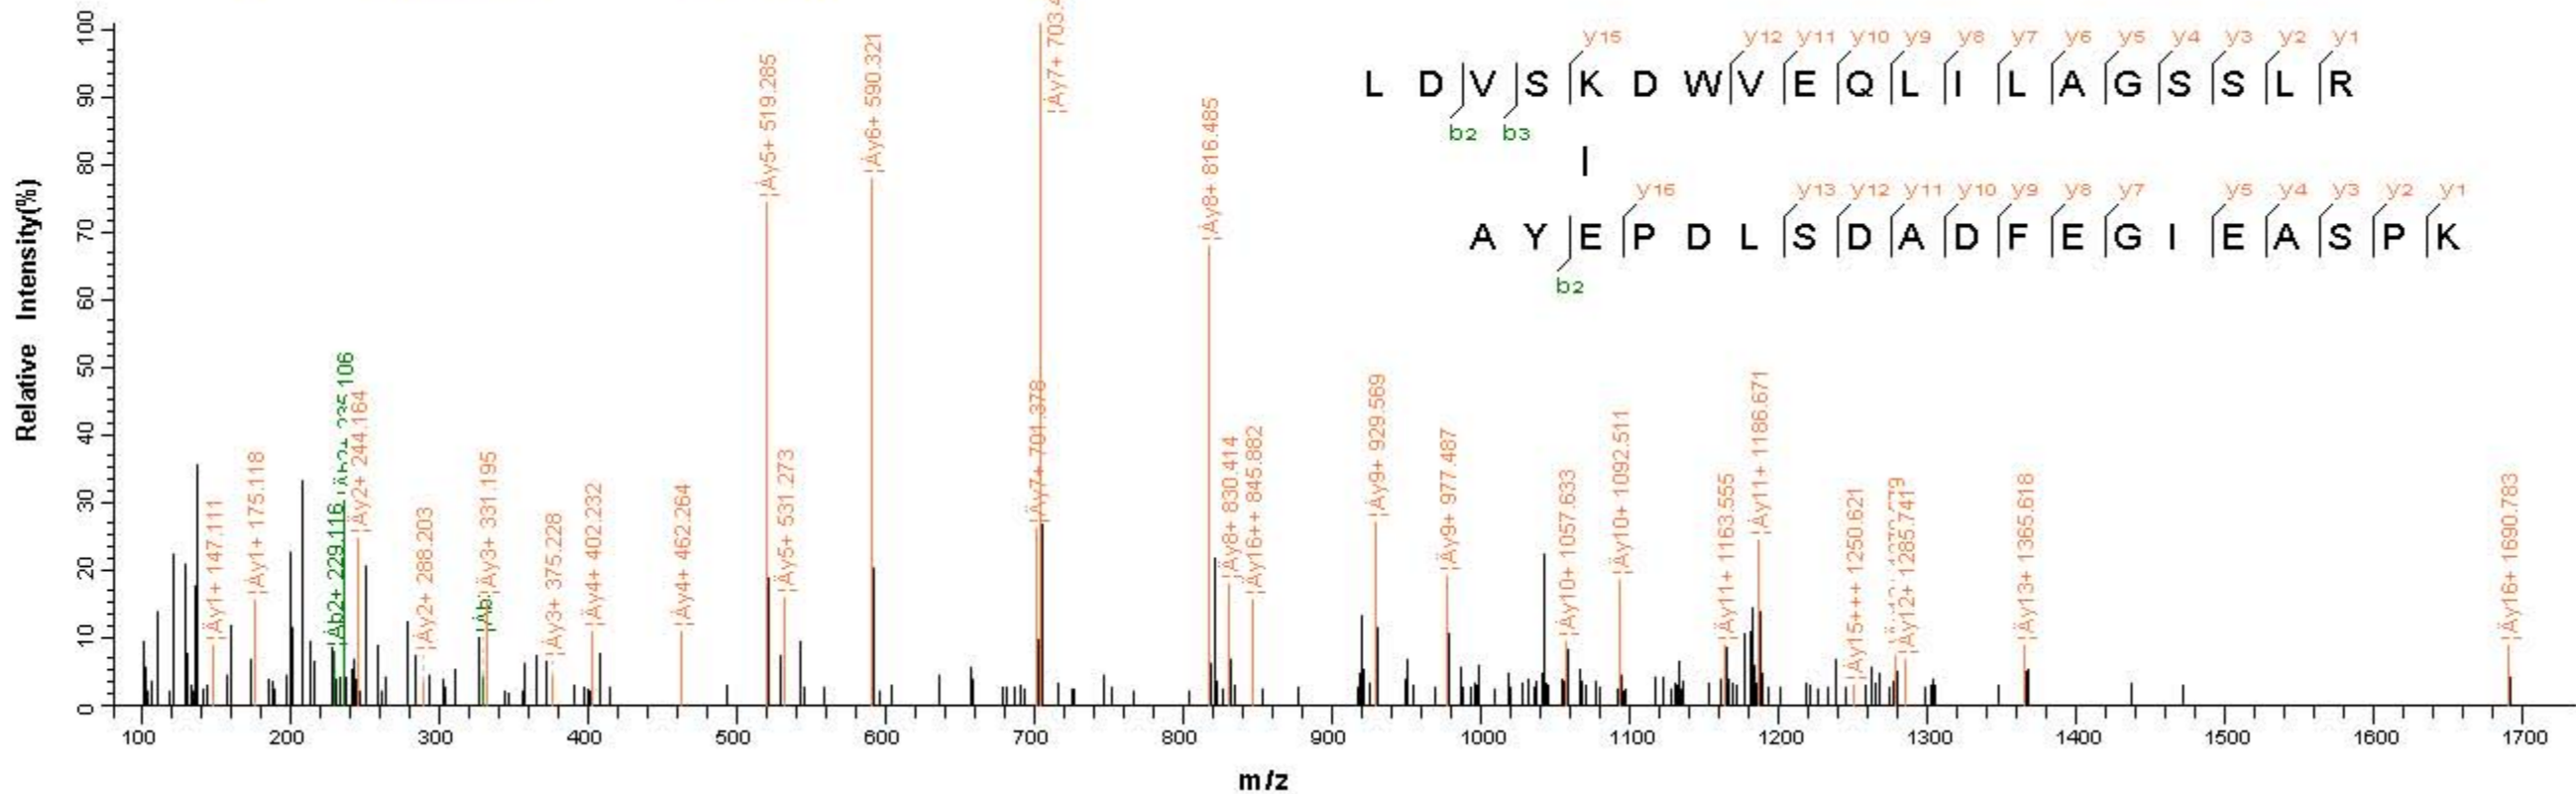

Charge: 5 MH+: 4294.2506 Score: 1.36e-006

Relative Intensity(%)

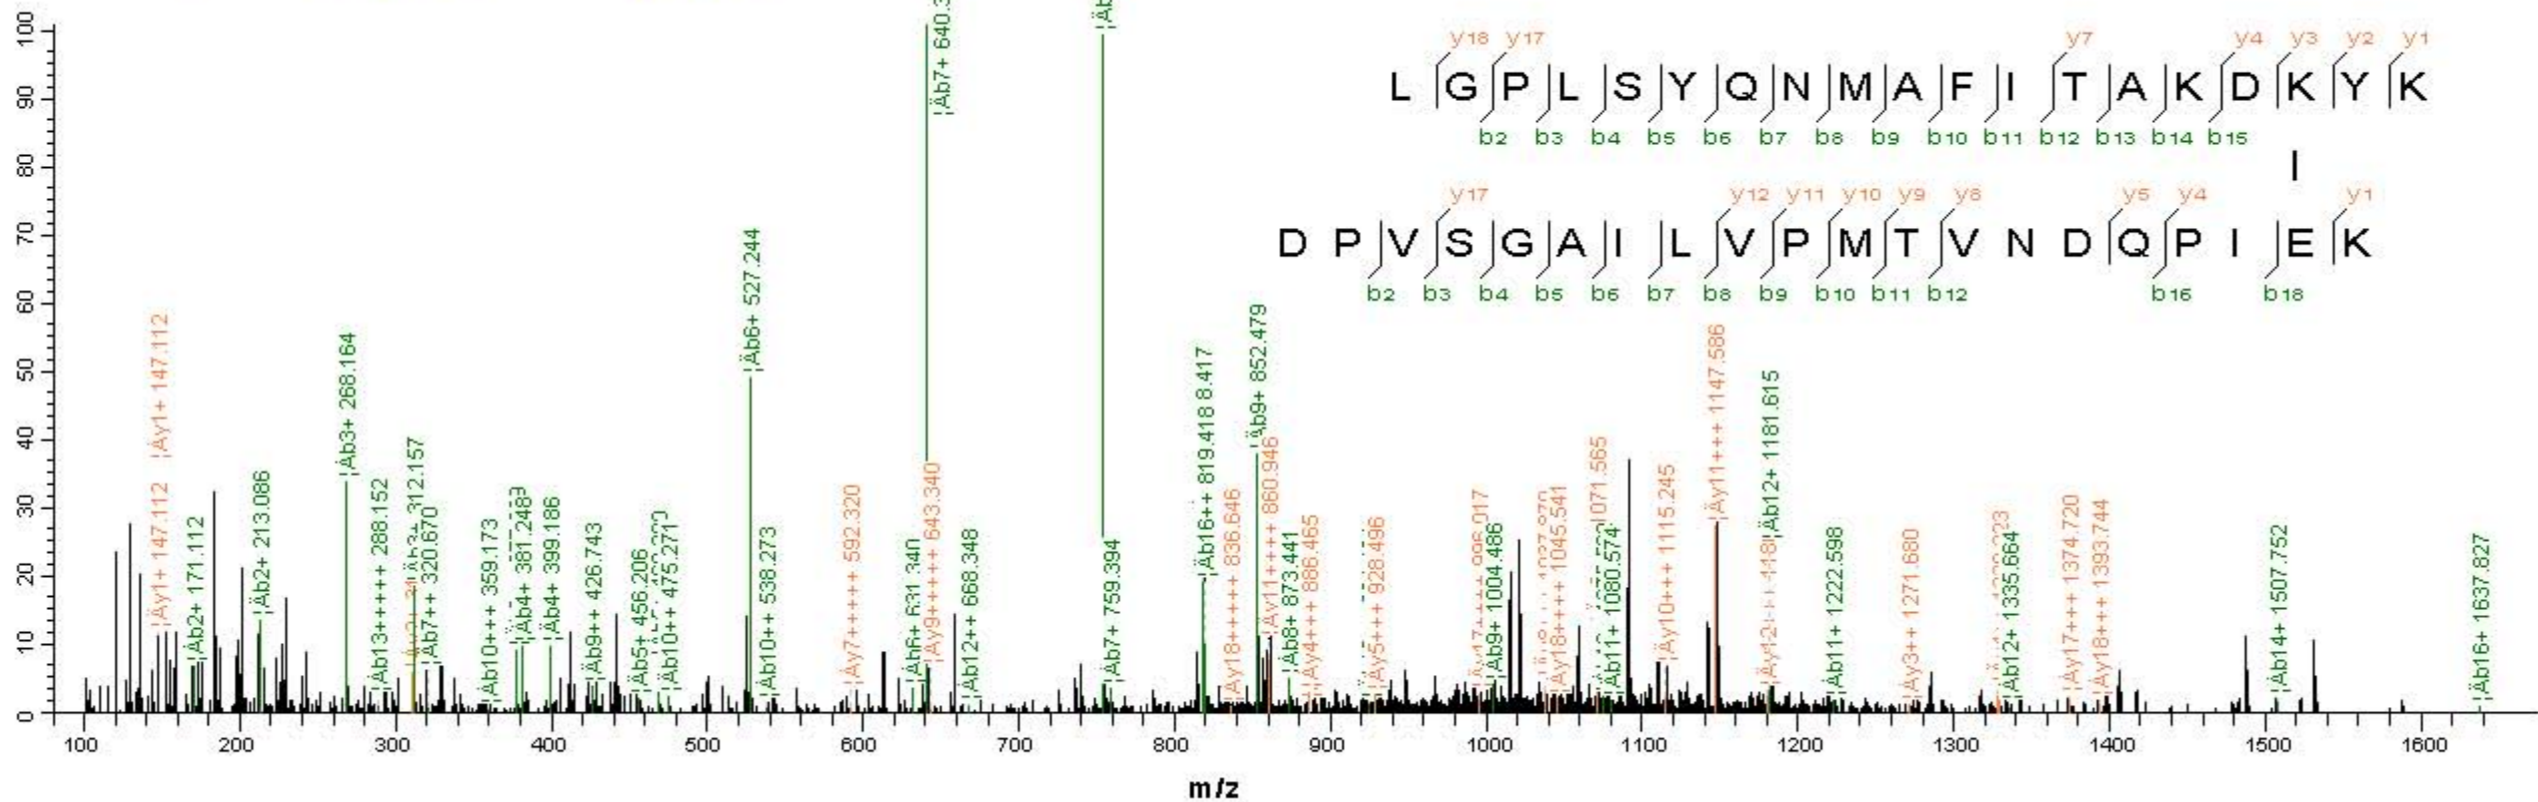

Charge: 5 MH+: 3463.7208 Score: 2.78e-008

Relative Intensity(%)

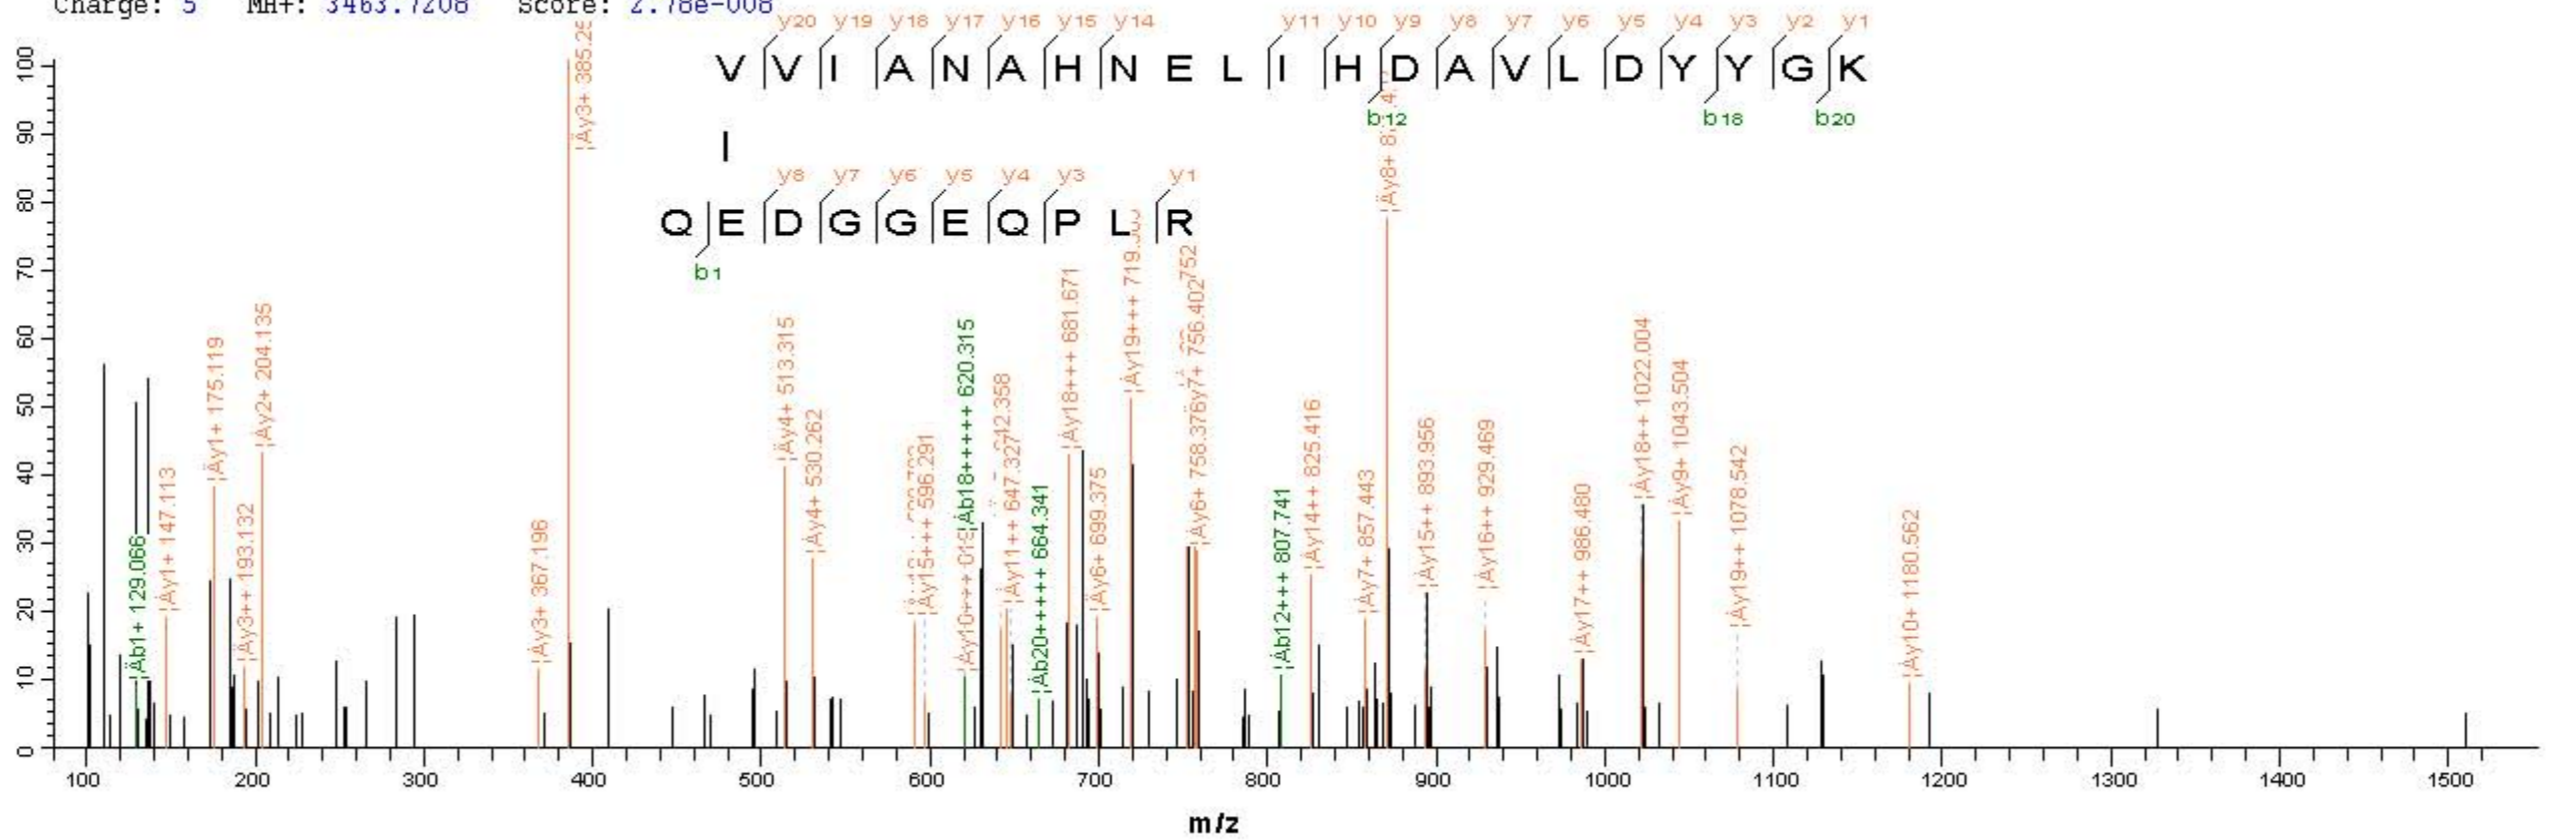

Charge: 5 MH+: 4165.1942 Score: 2.50e-006

V V I A N A H N E L I H D A V L D Y Y G K  
b5 b11 b13

L T S W I V S Q I G P E I E E K  
b2 b3 b4 b5 b6 b7 b8 b12 b13 b14

Relative Intensity(%)

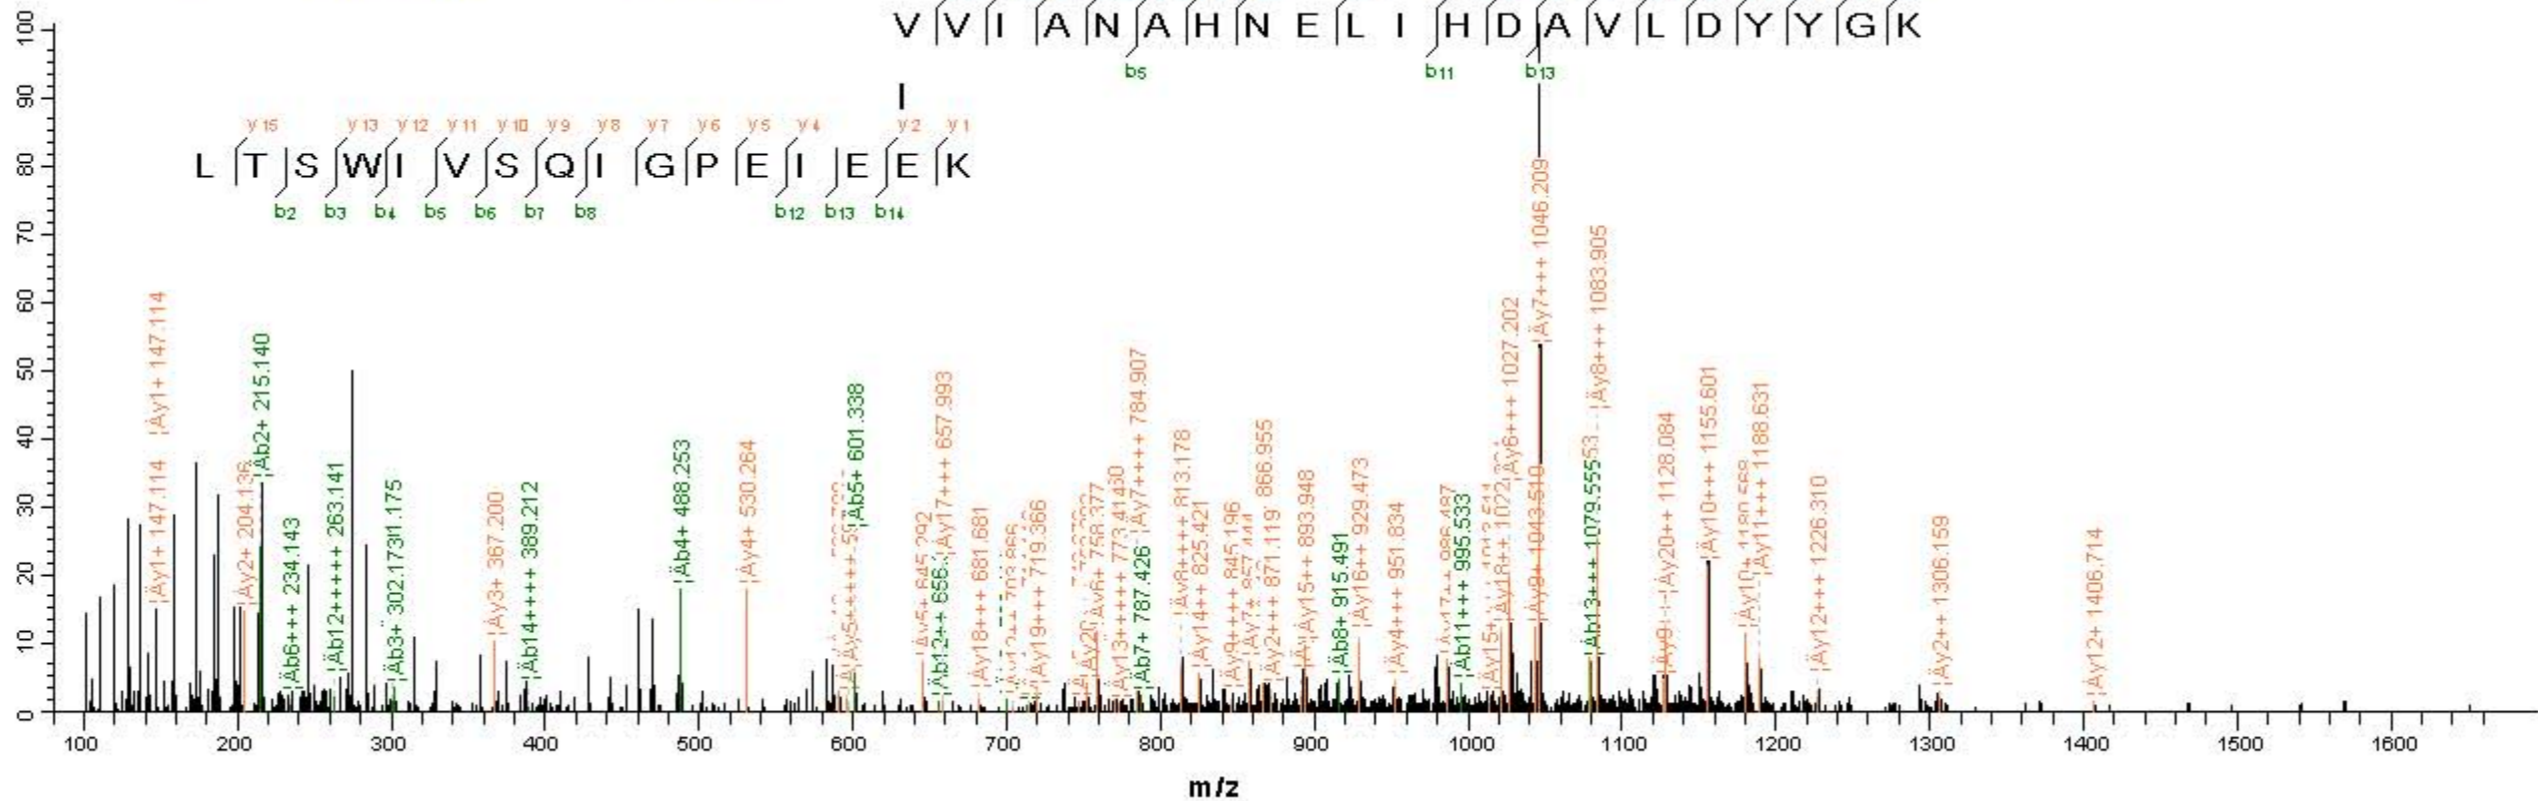

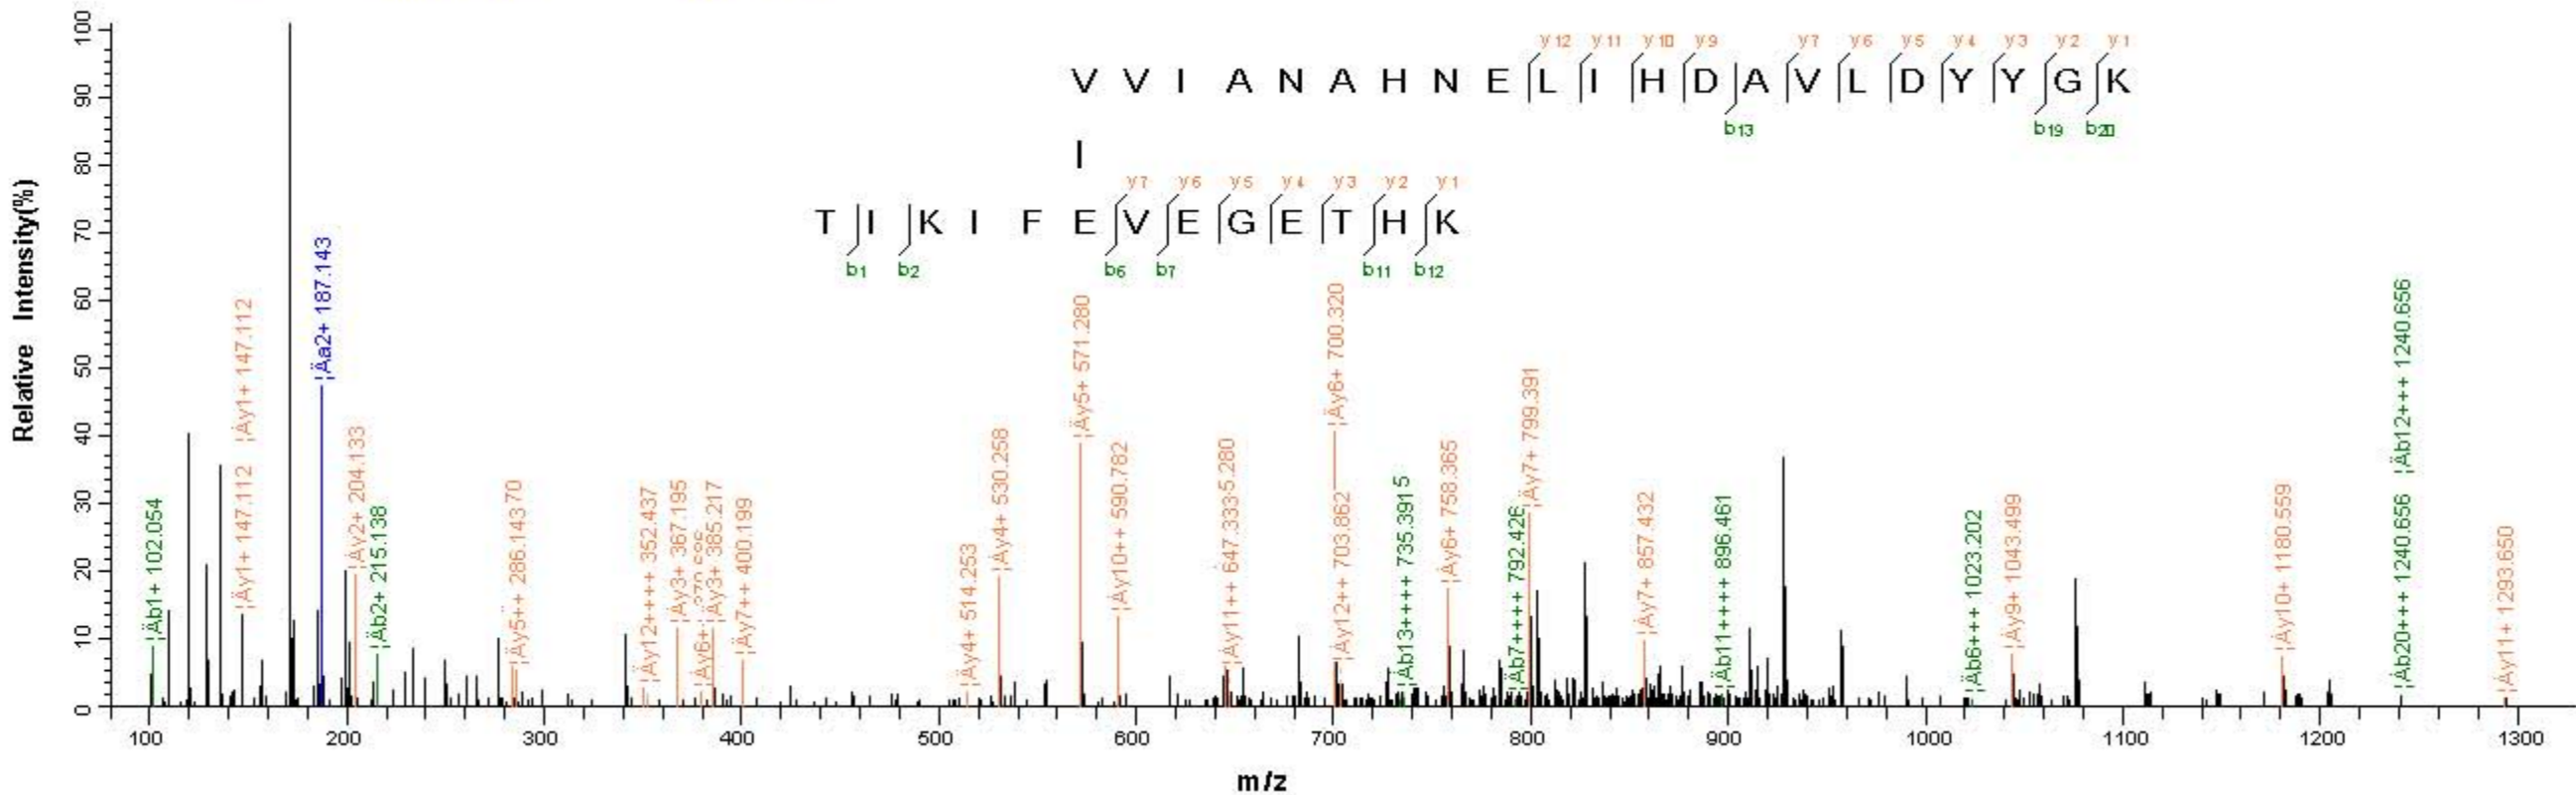

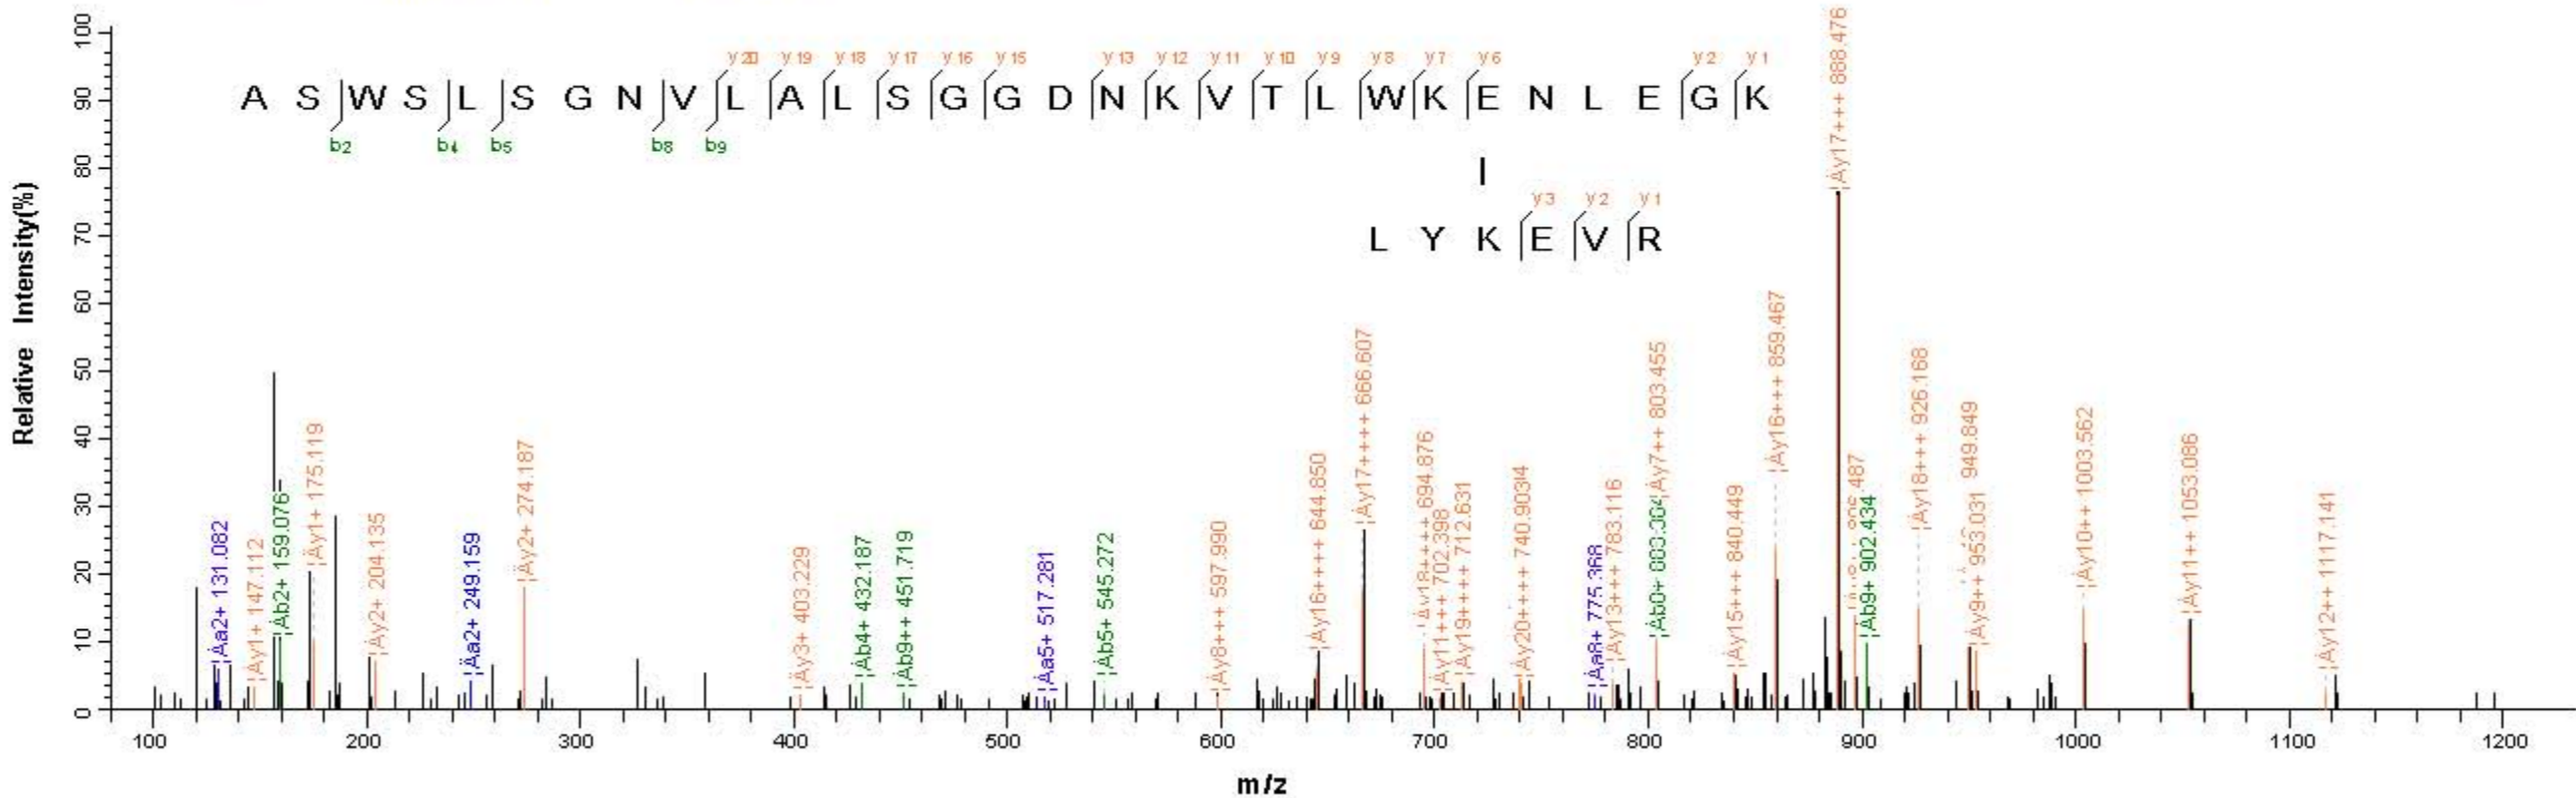



Charge: 4 MH+: 2027.0249 Score: 1.52e-004

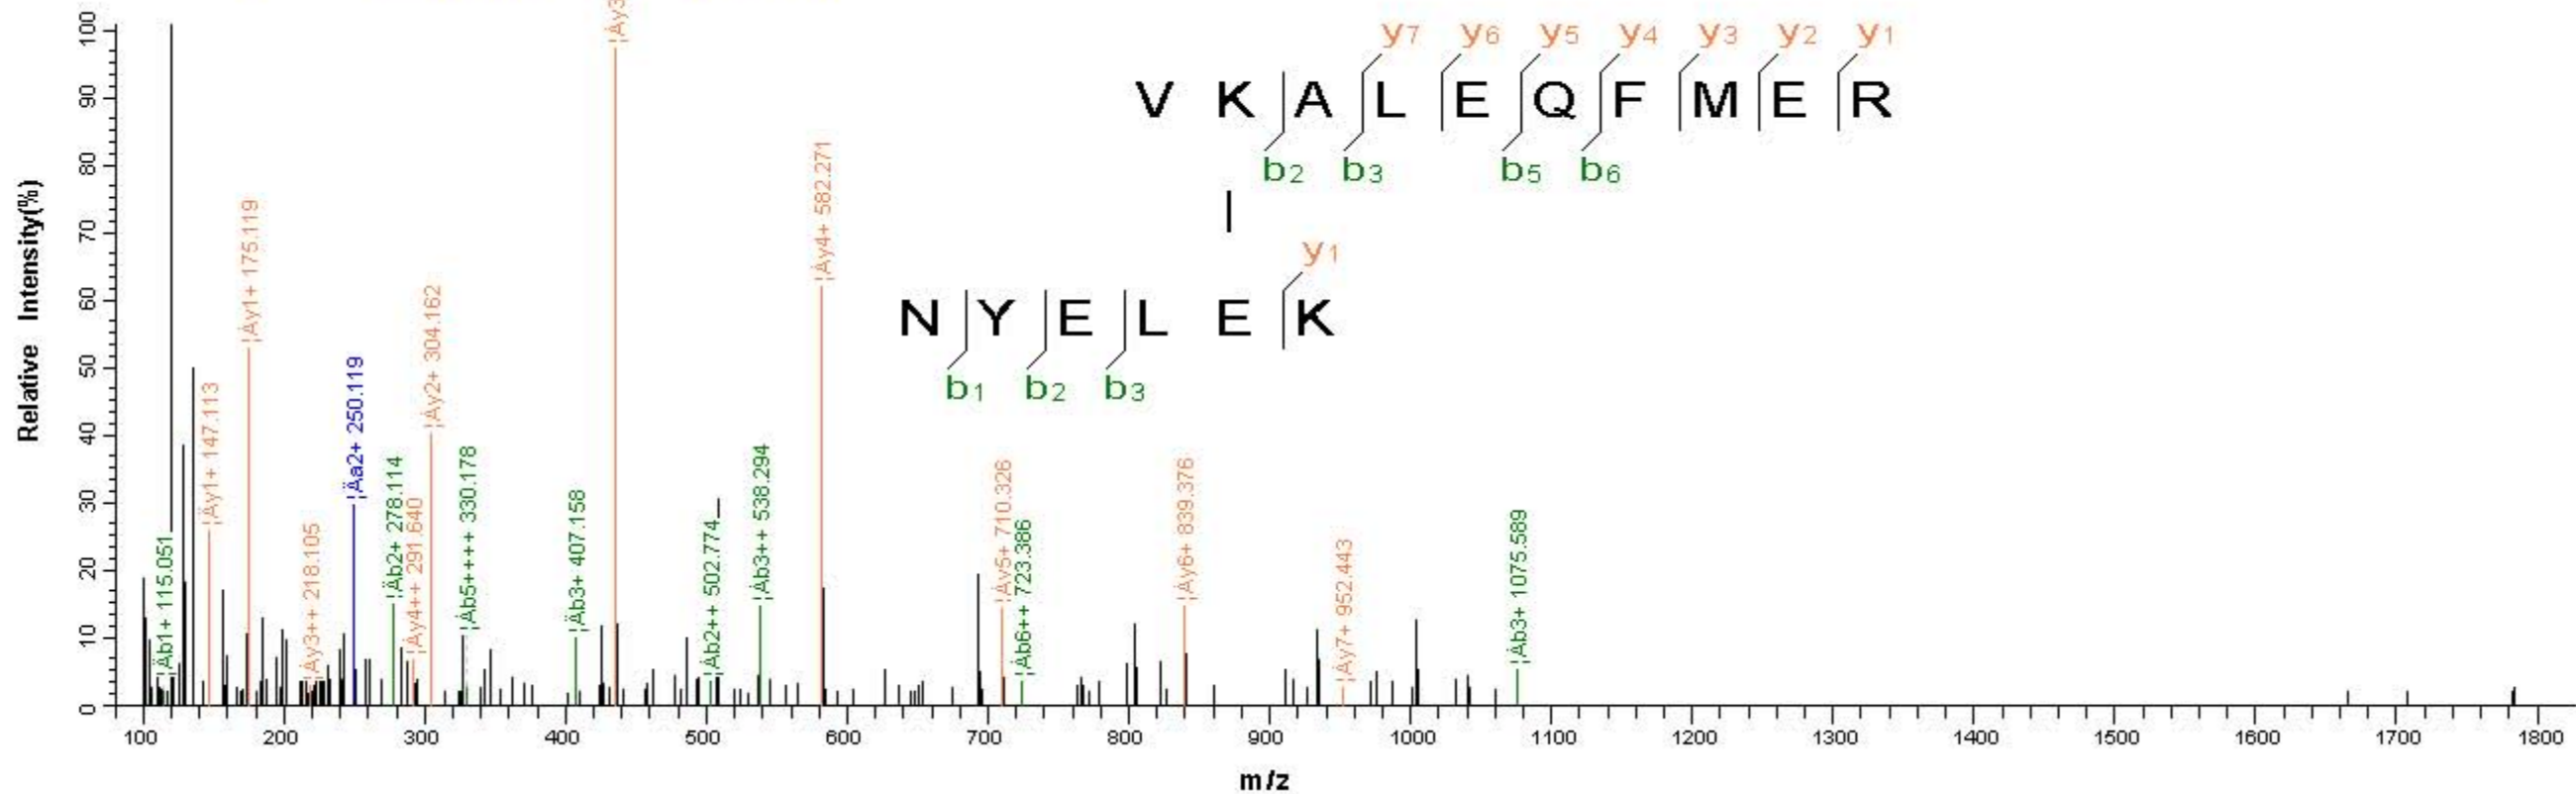

Charge: 4 MH+: 2243.0844 Score: 1.26e-006

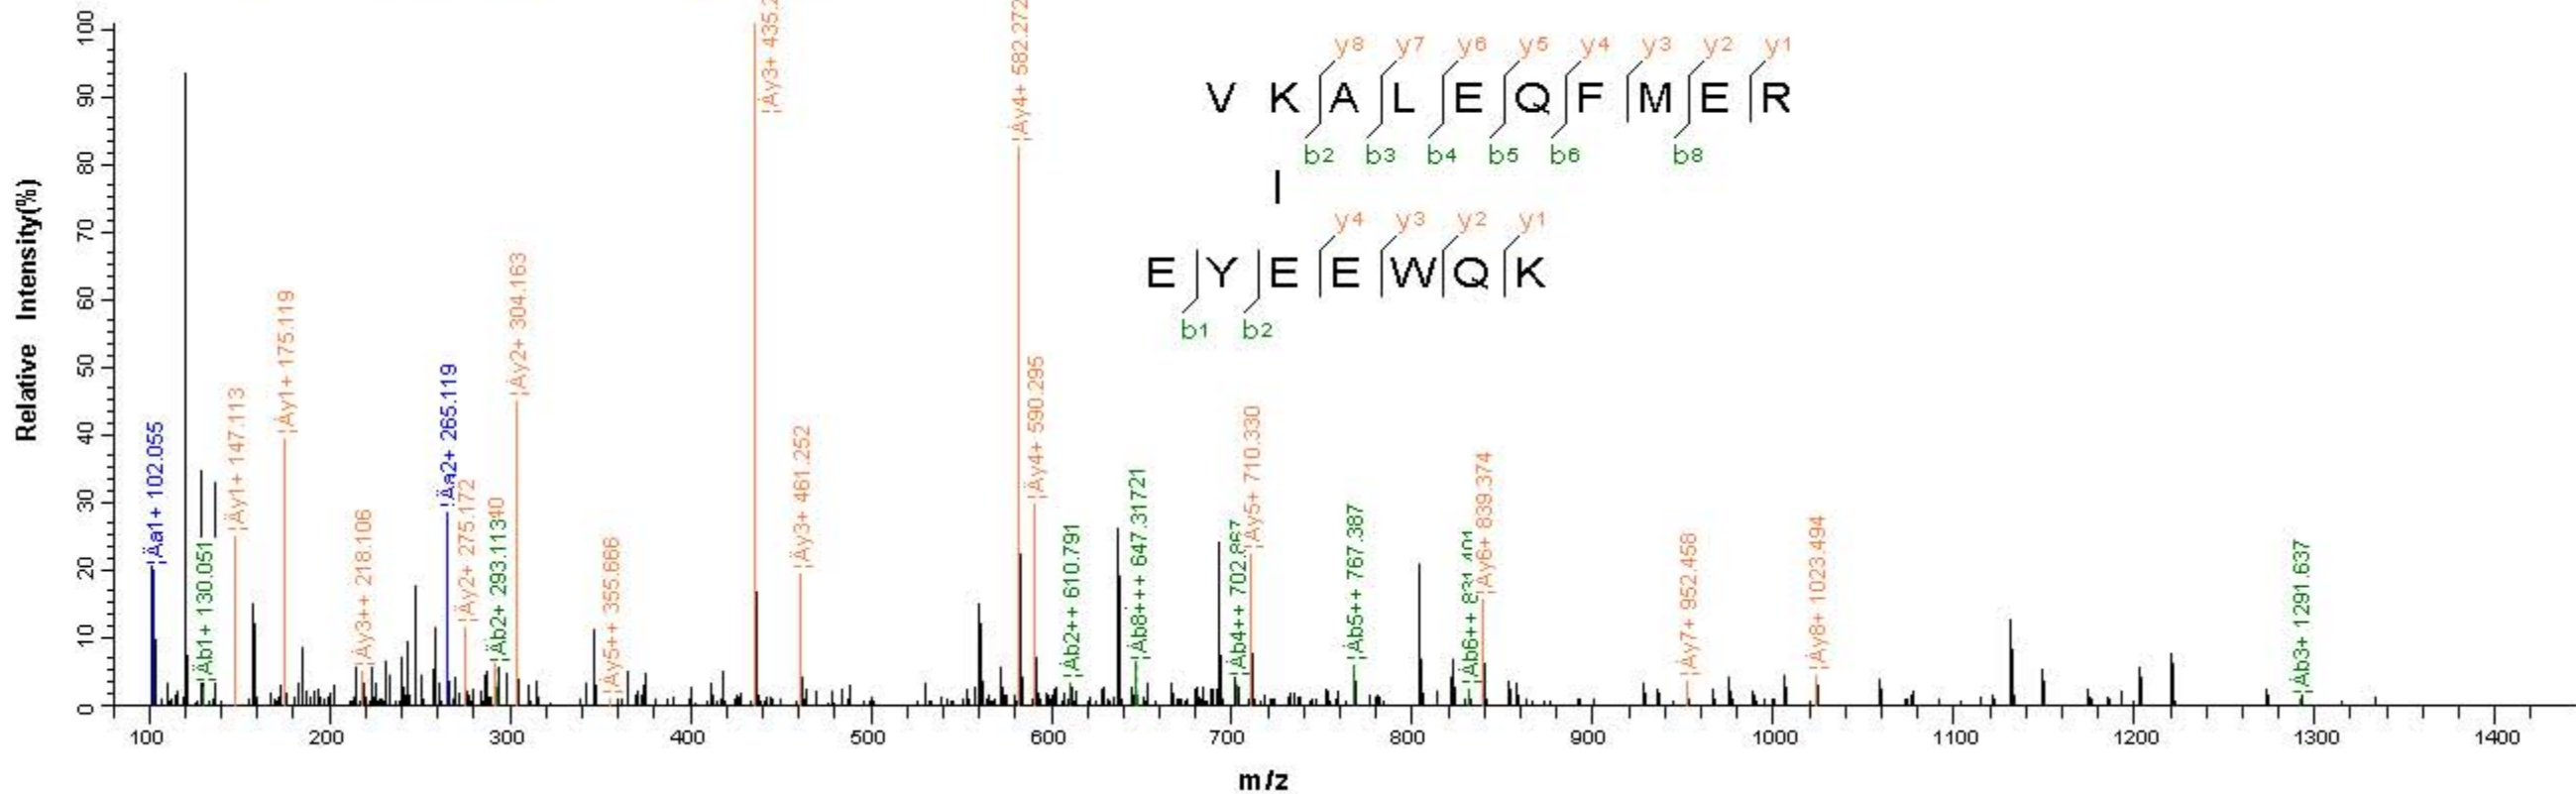

Relative Intensity(%)

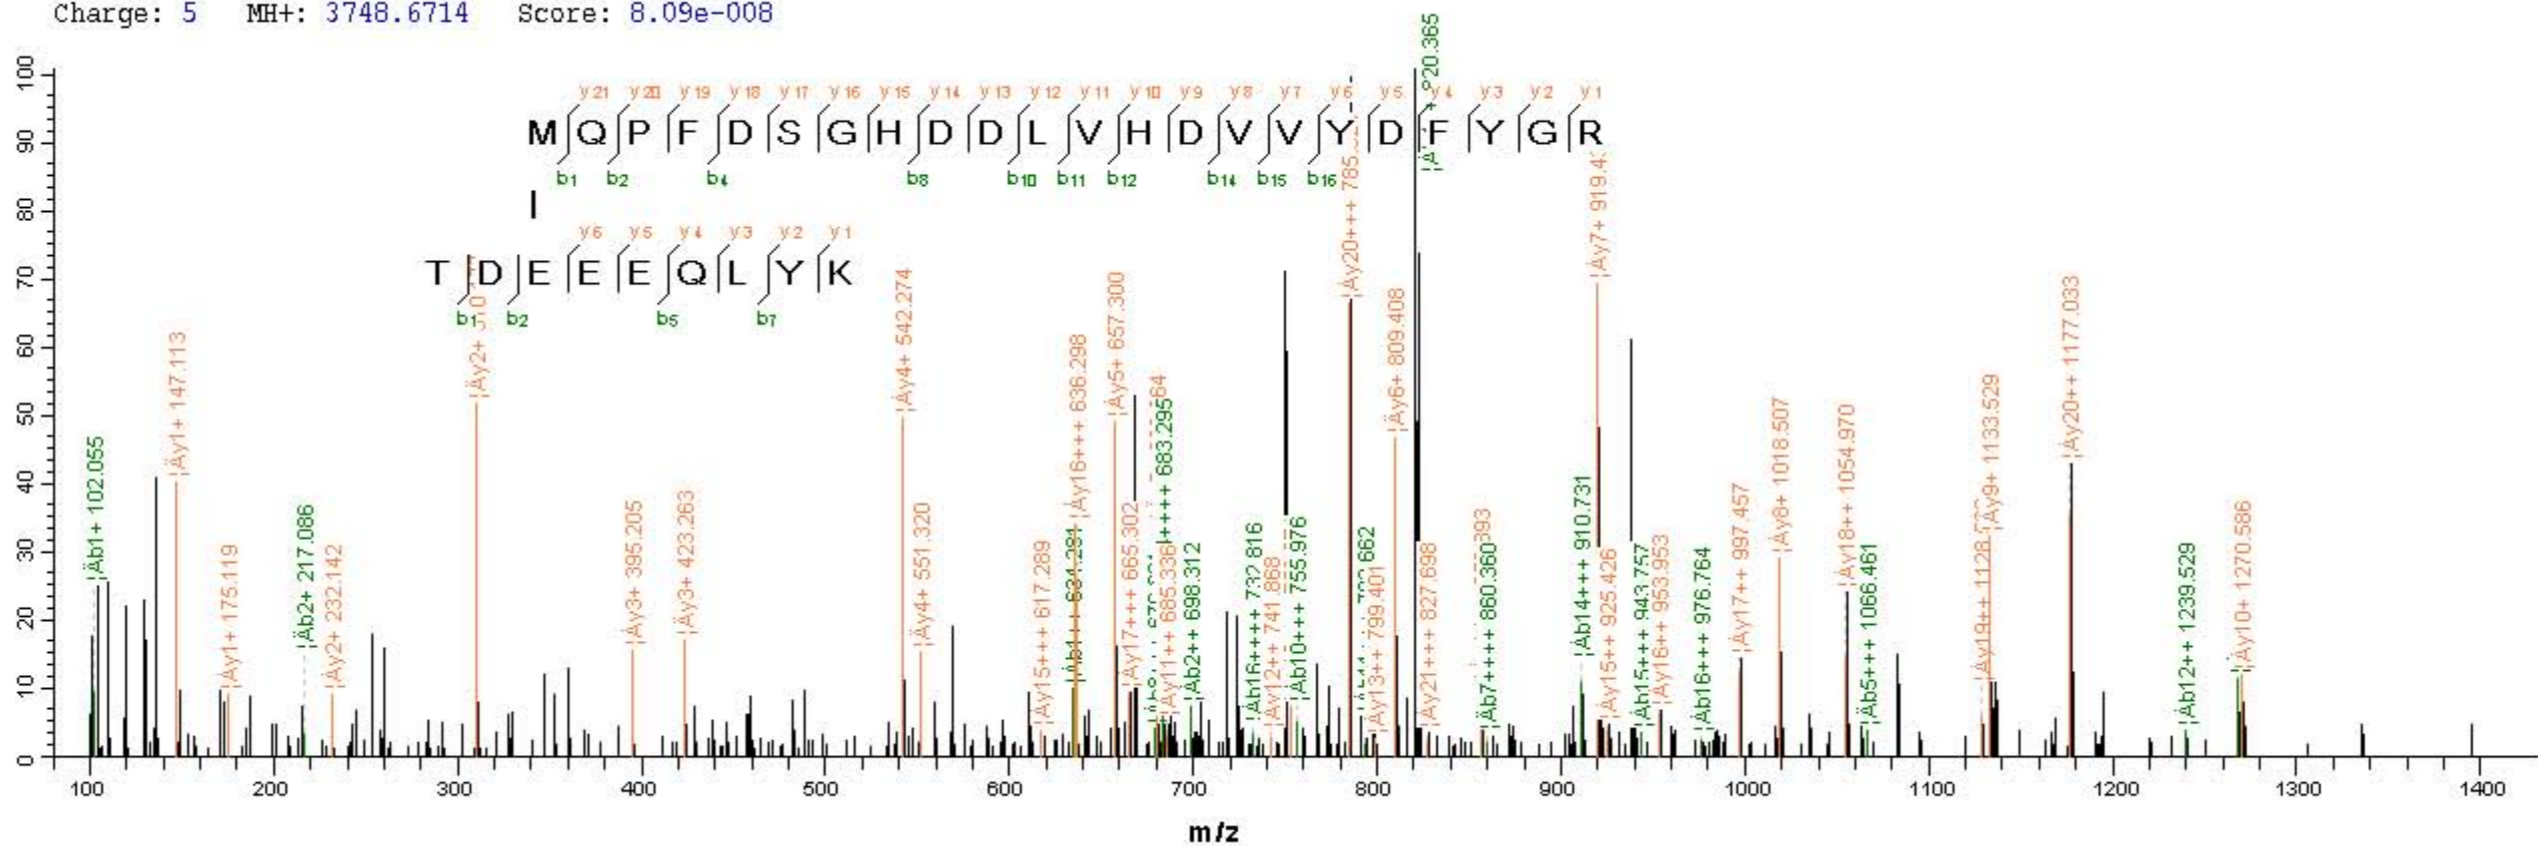

m/z

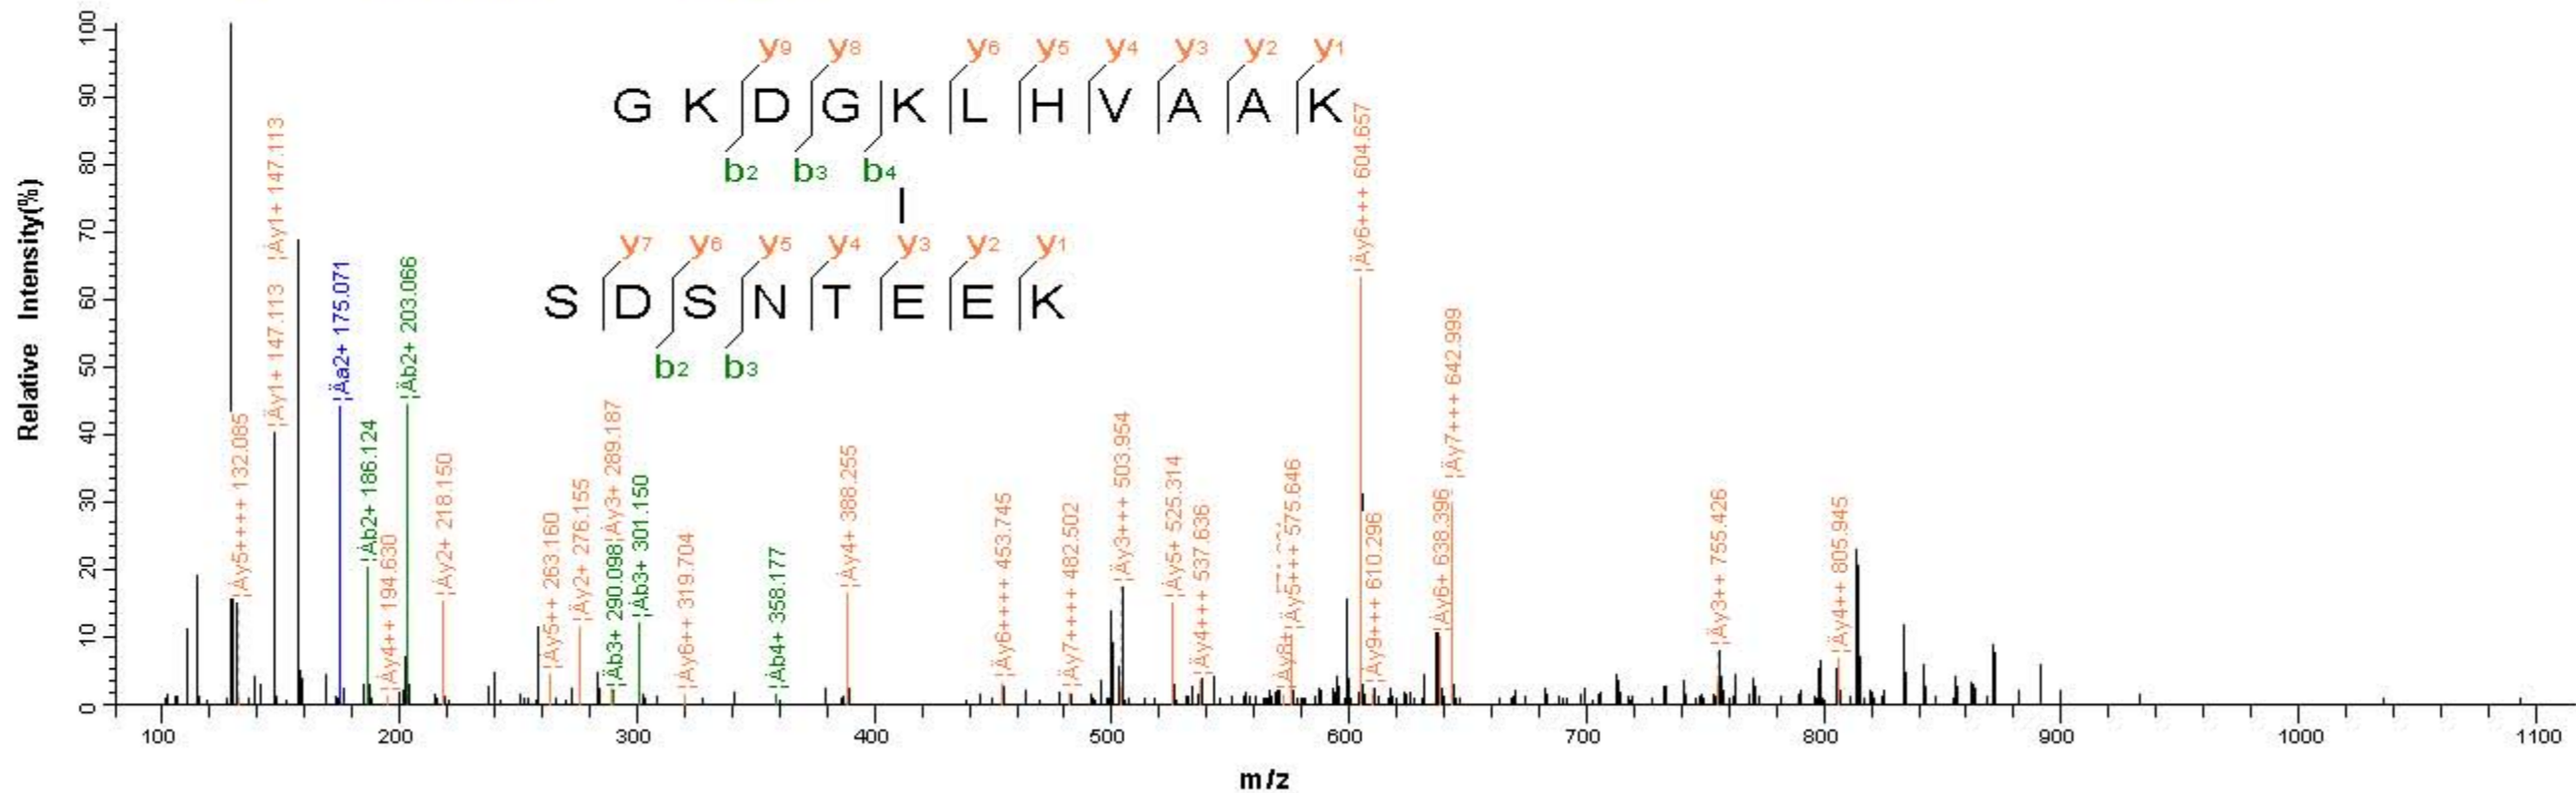

Charge: 4 MH+: 2097.0800 Score: 2.02e-007

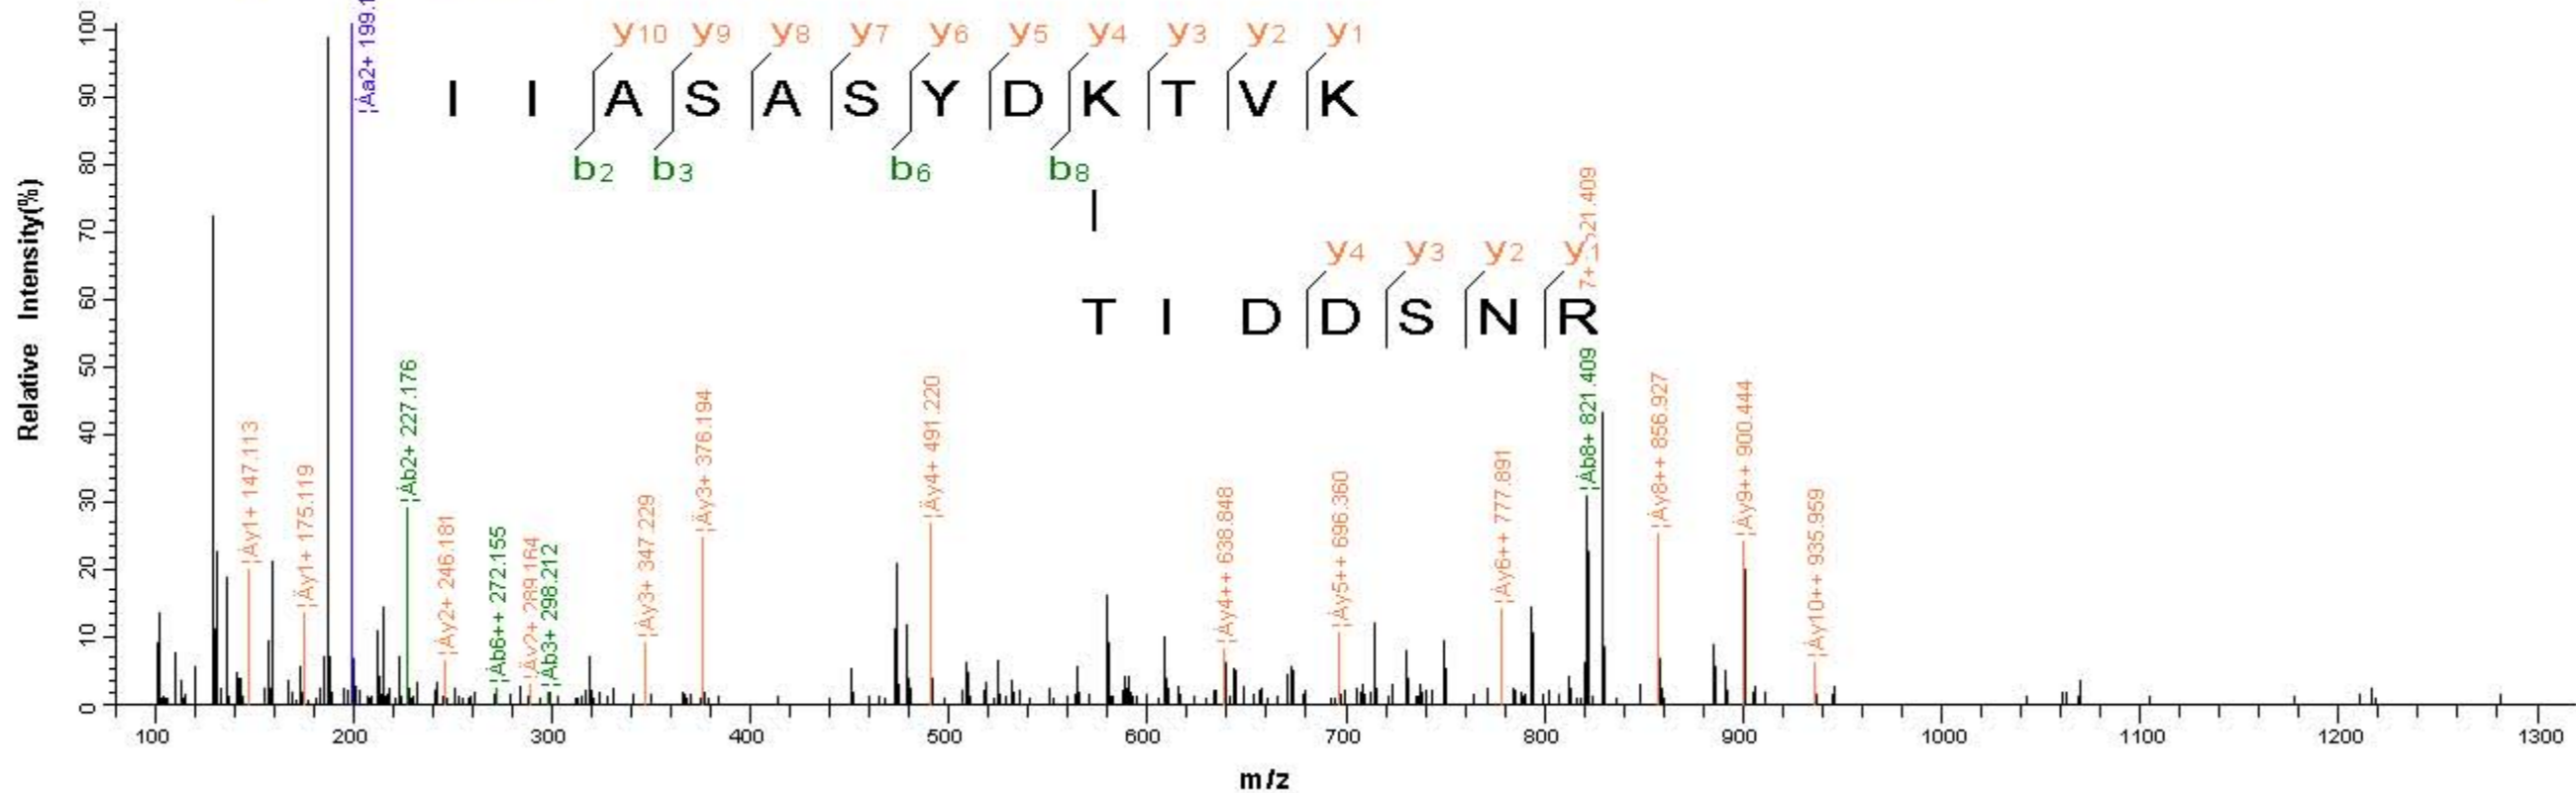

Charge: 4 MH+: 3486.6811 Score: 1.29e-022

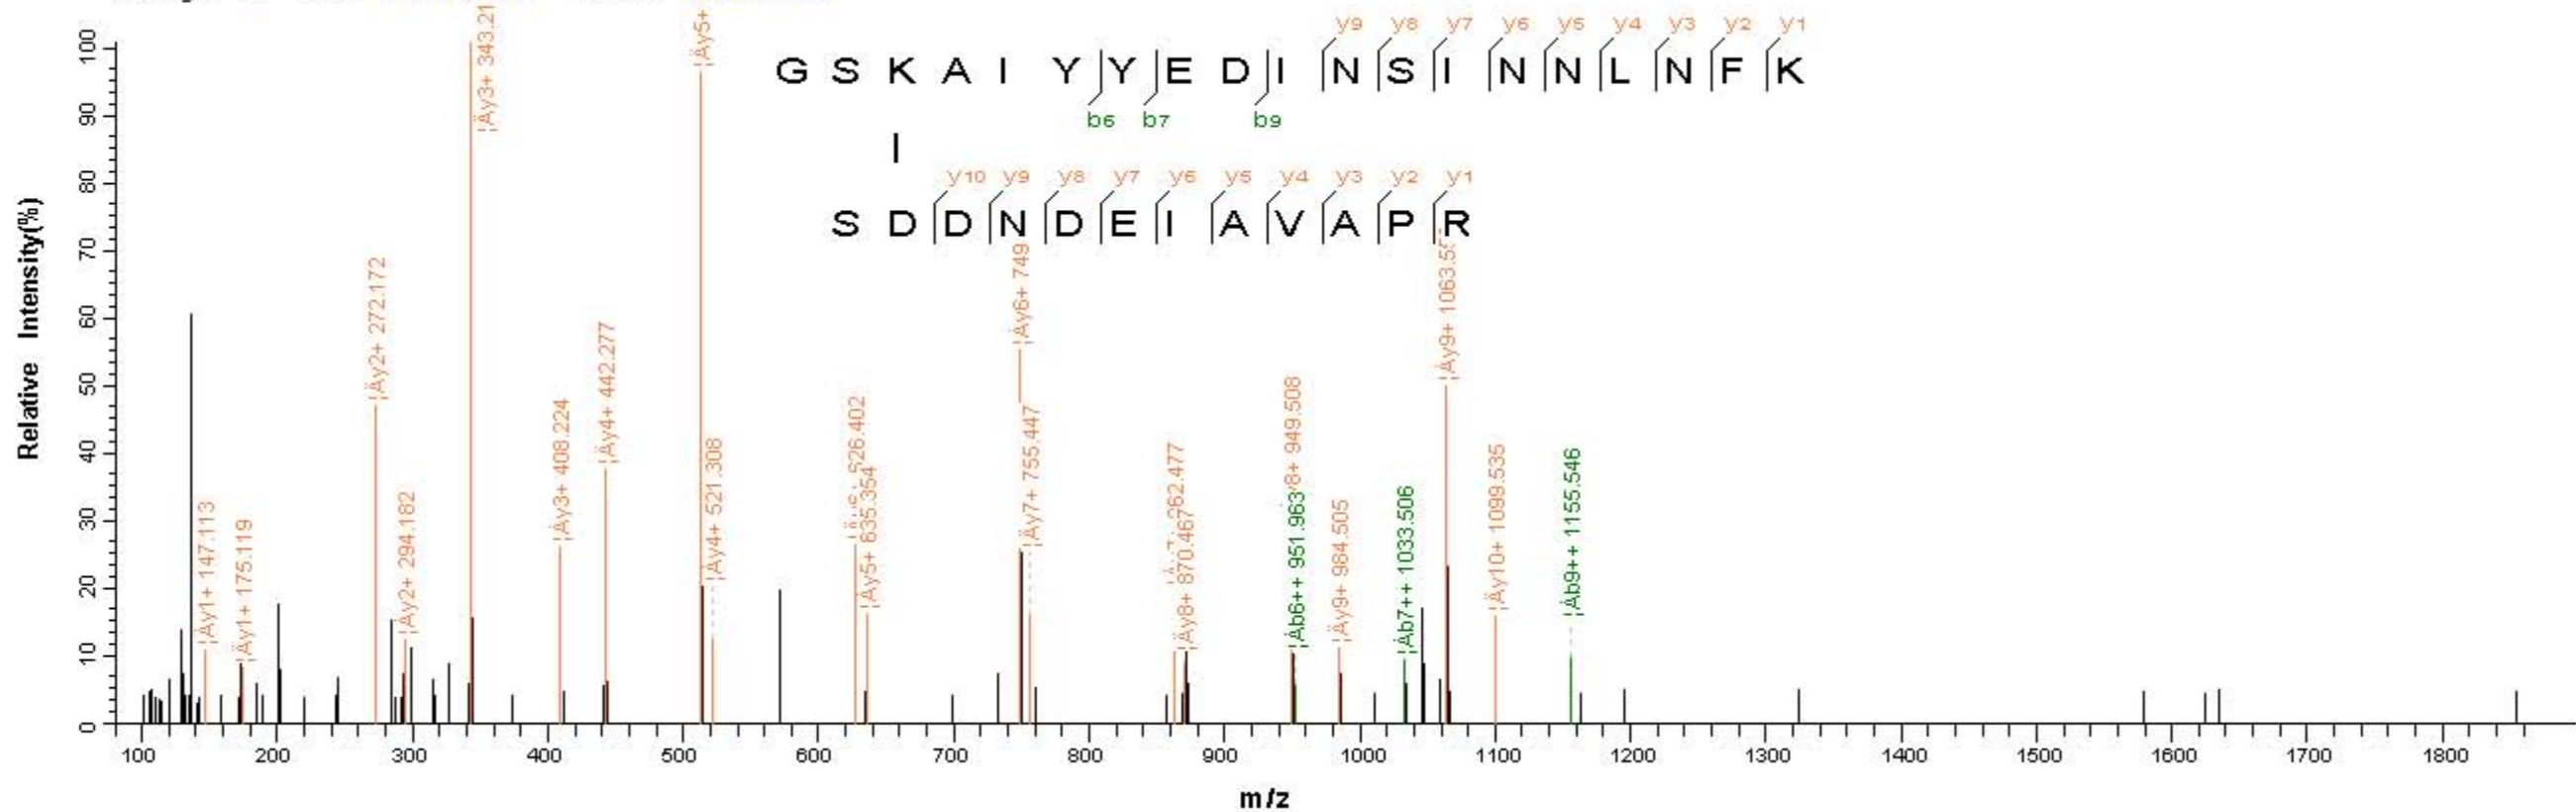

Charge: 4 MH+: 3671.7721 Score: 5.27e-008

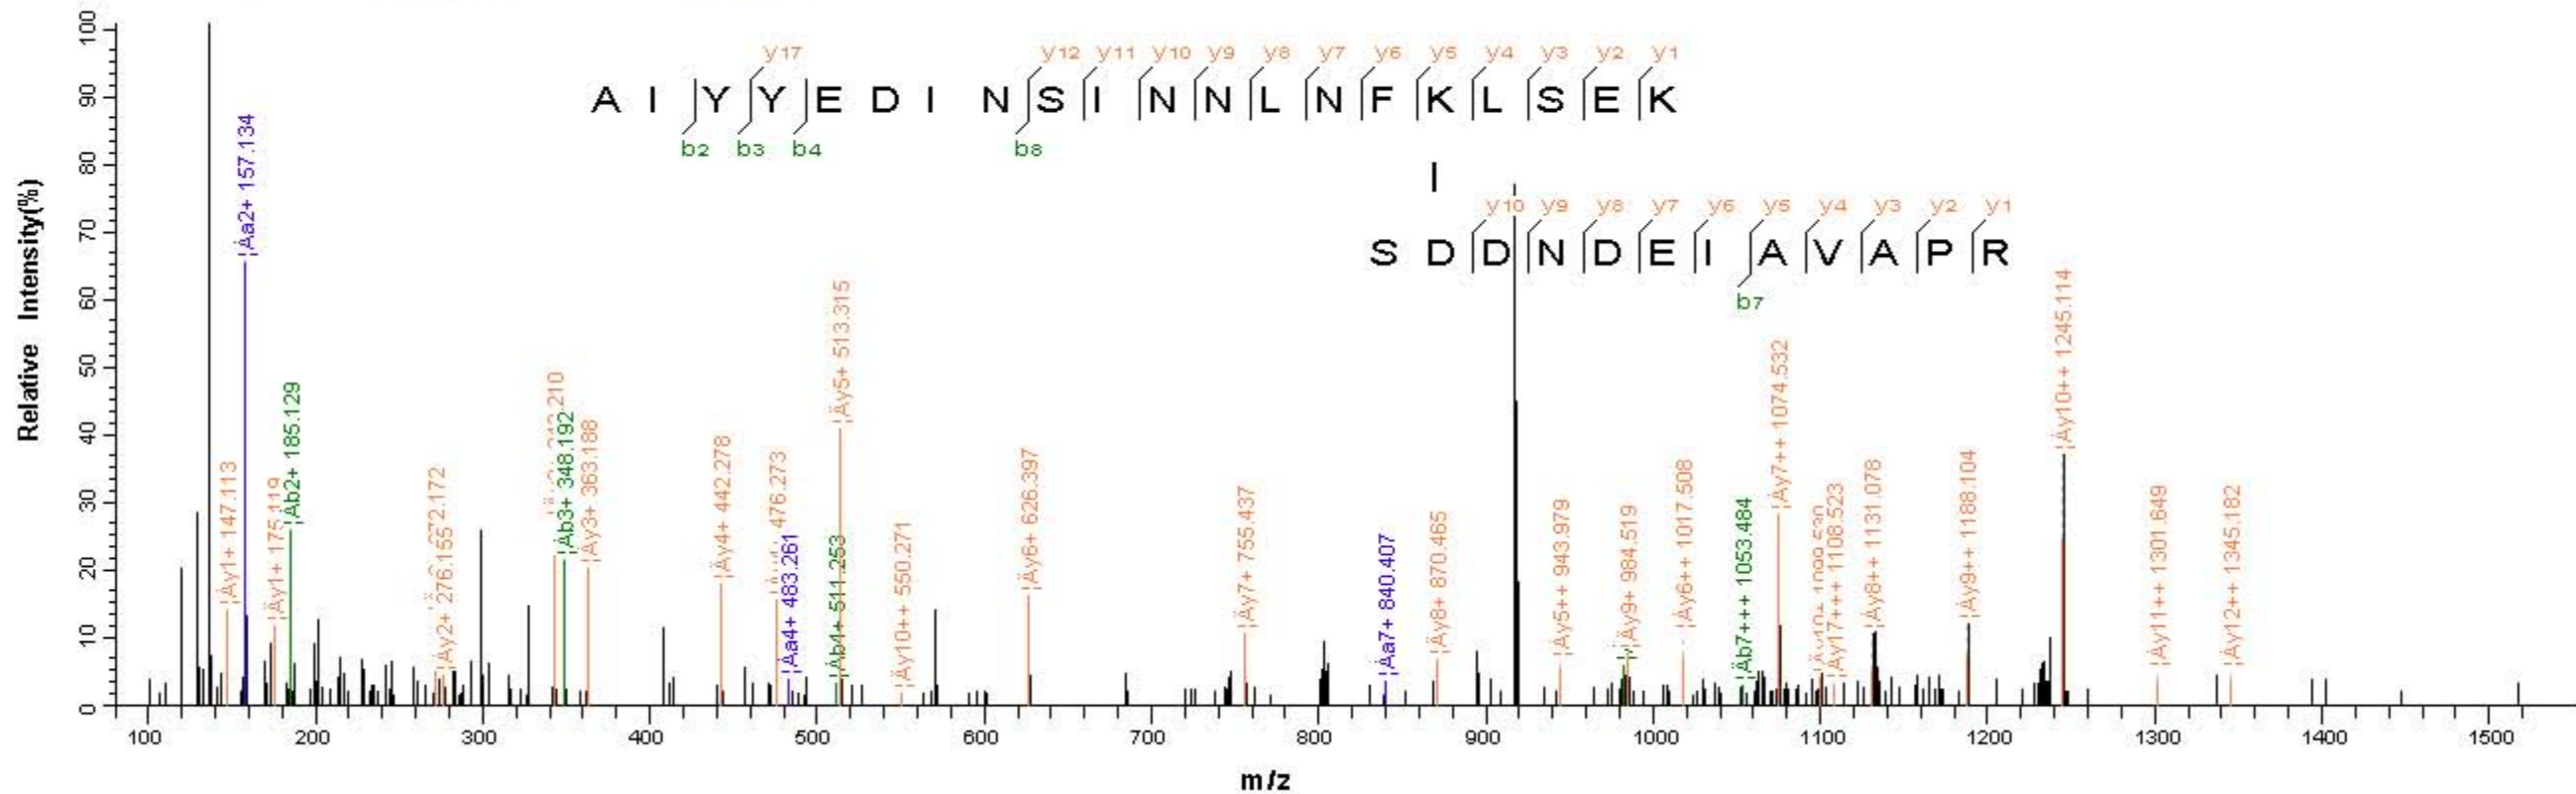

Relative Intensity(%)

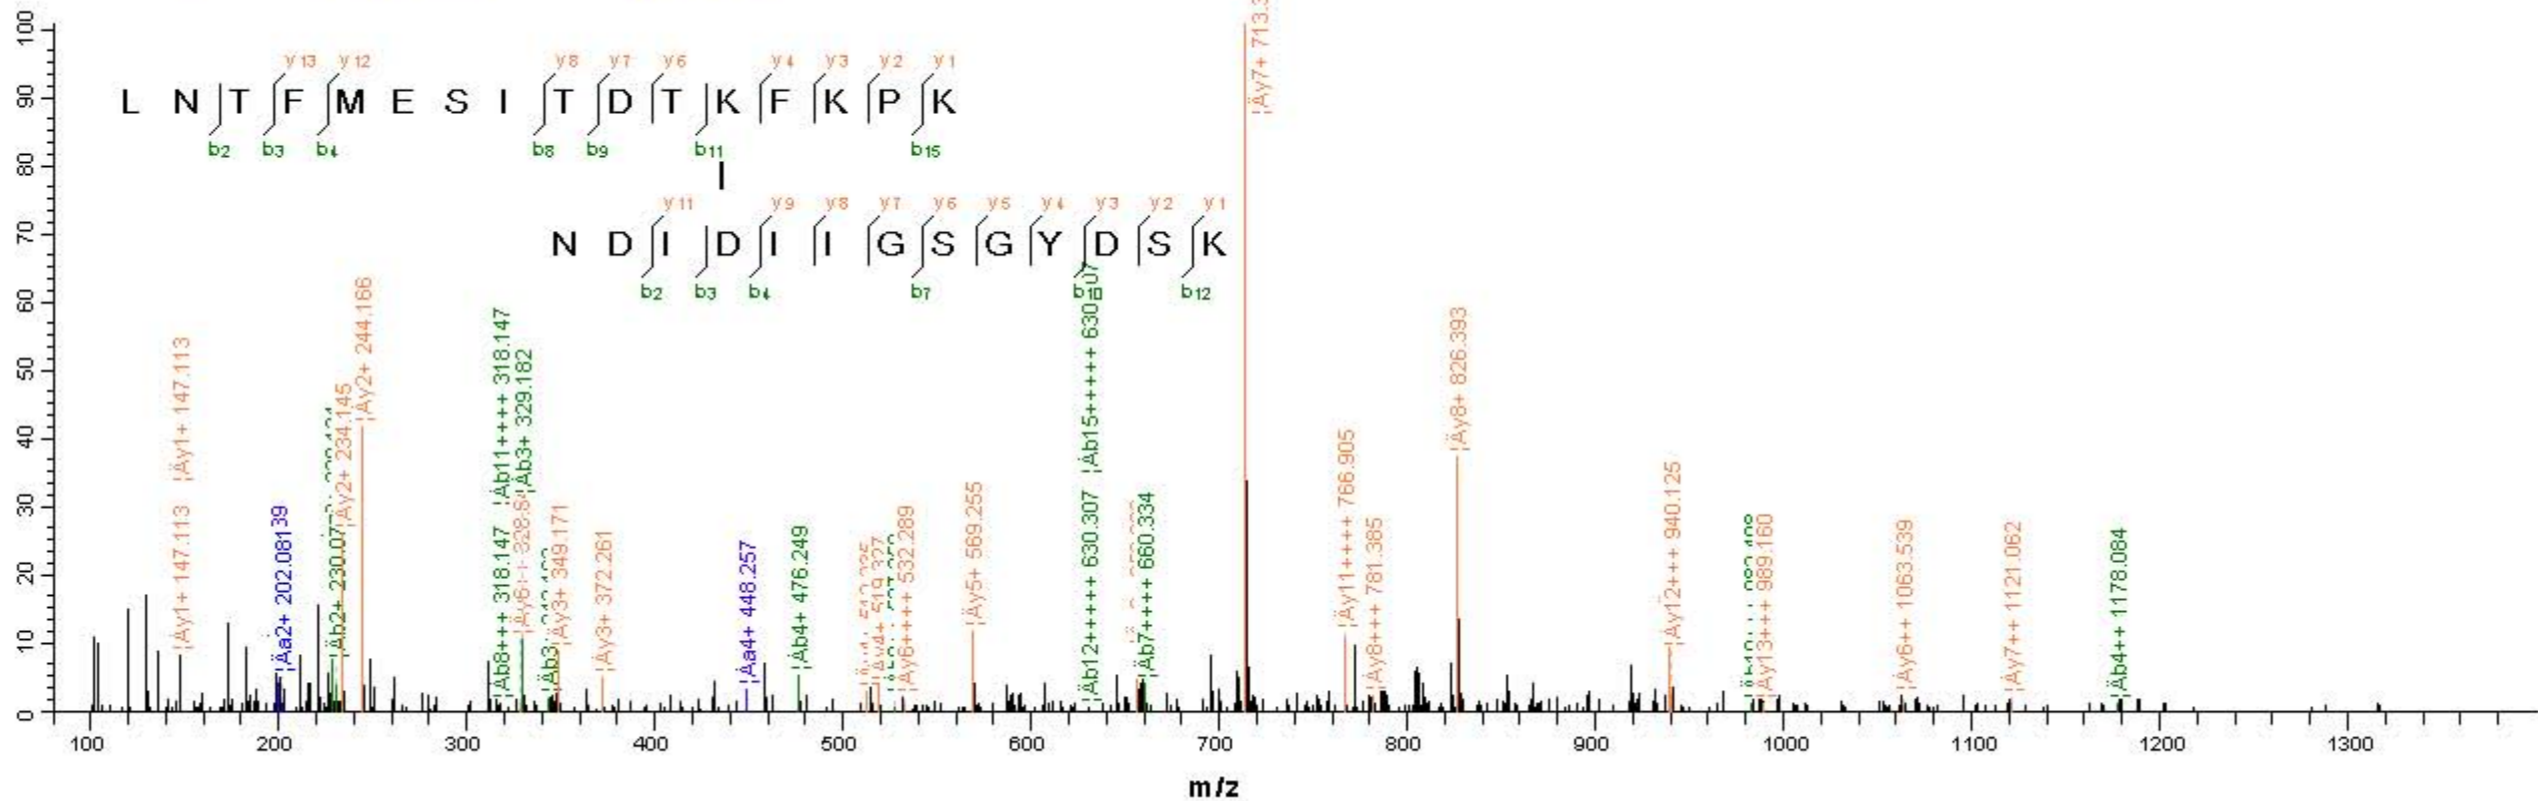



Charge: 5 MH+: 2833.4349 Score: 3.25e-006

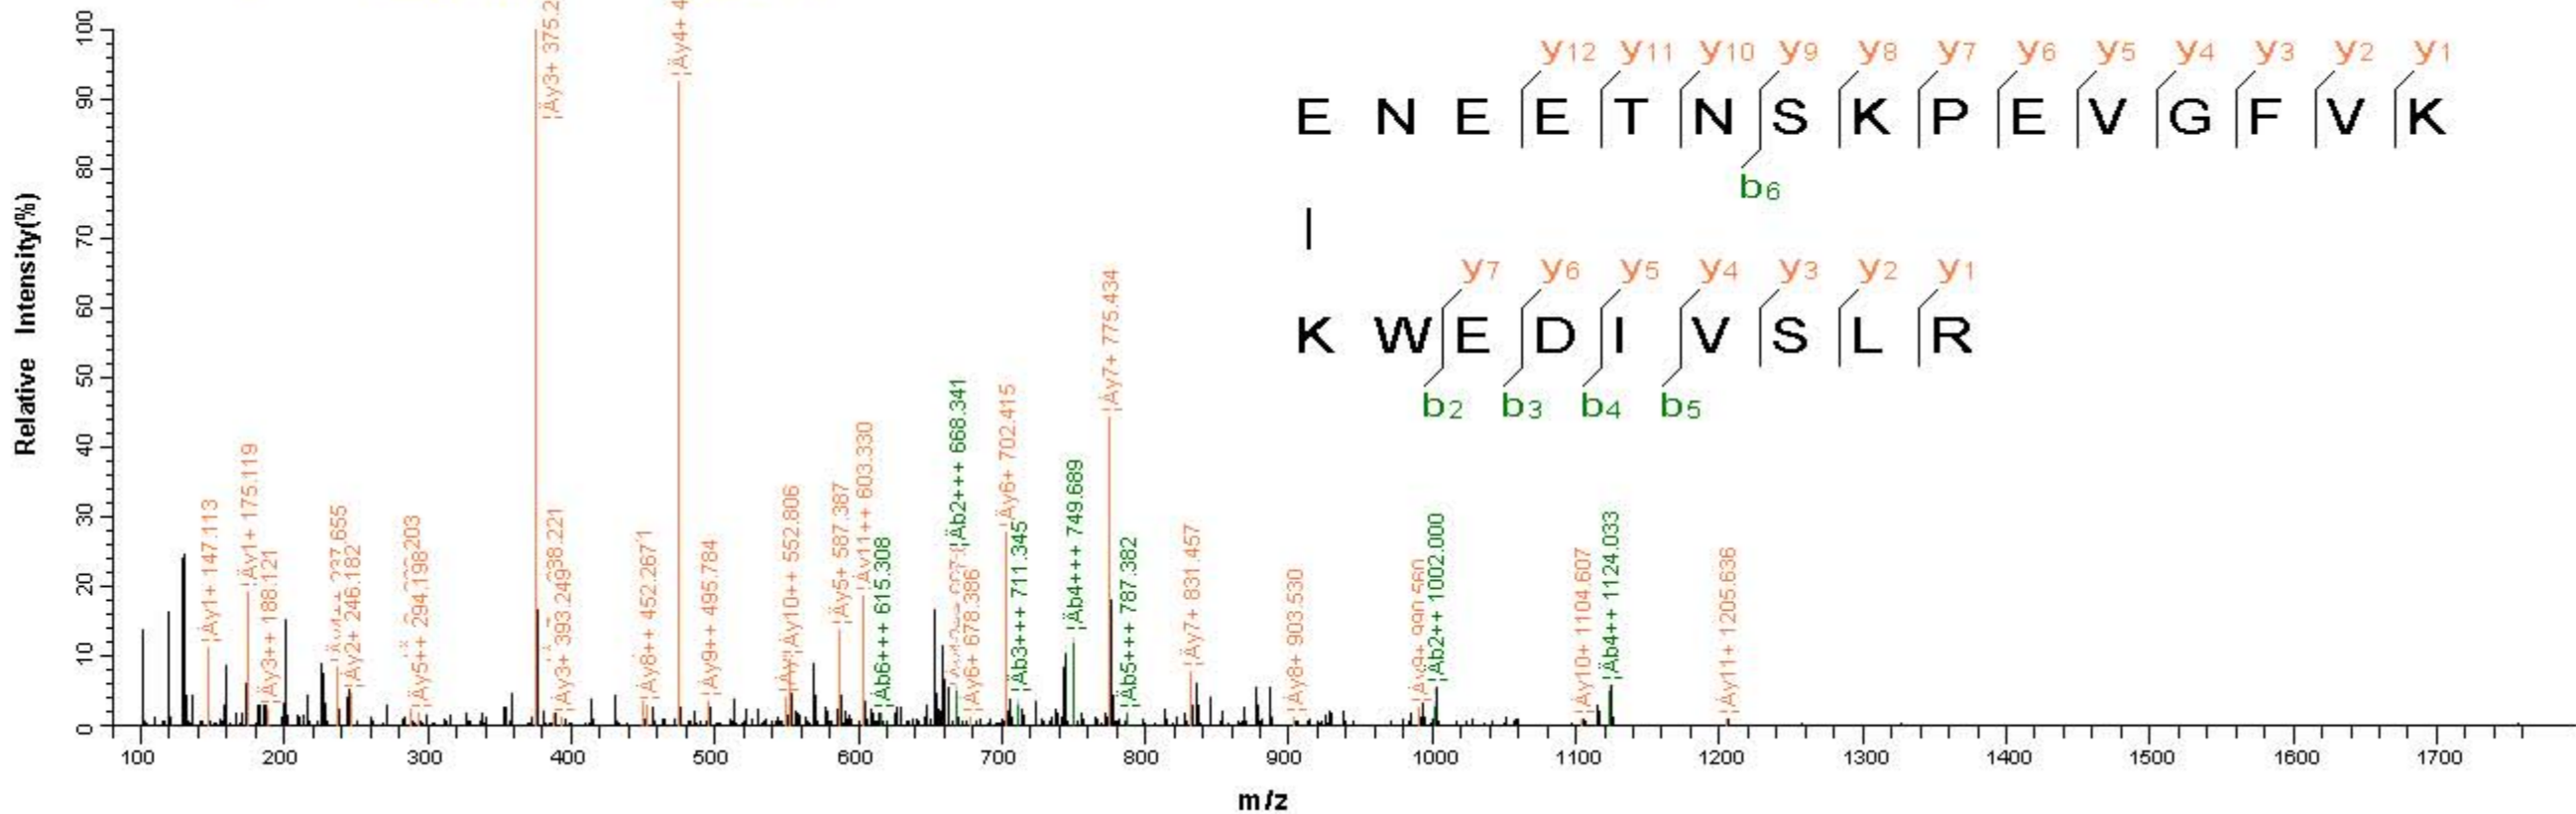

Charge: 4 MH+: 3324.7460 Score: 2.22e-003

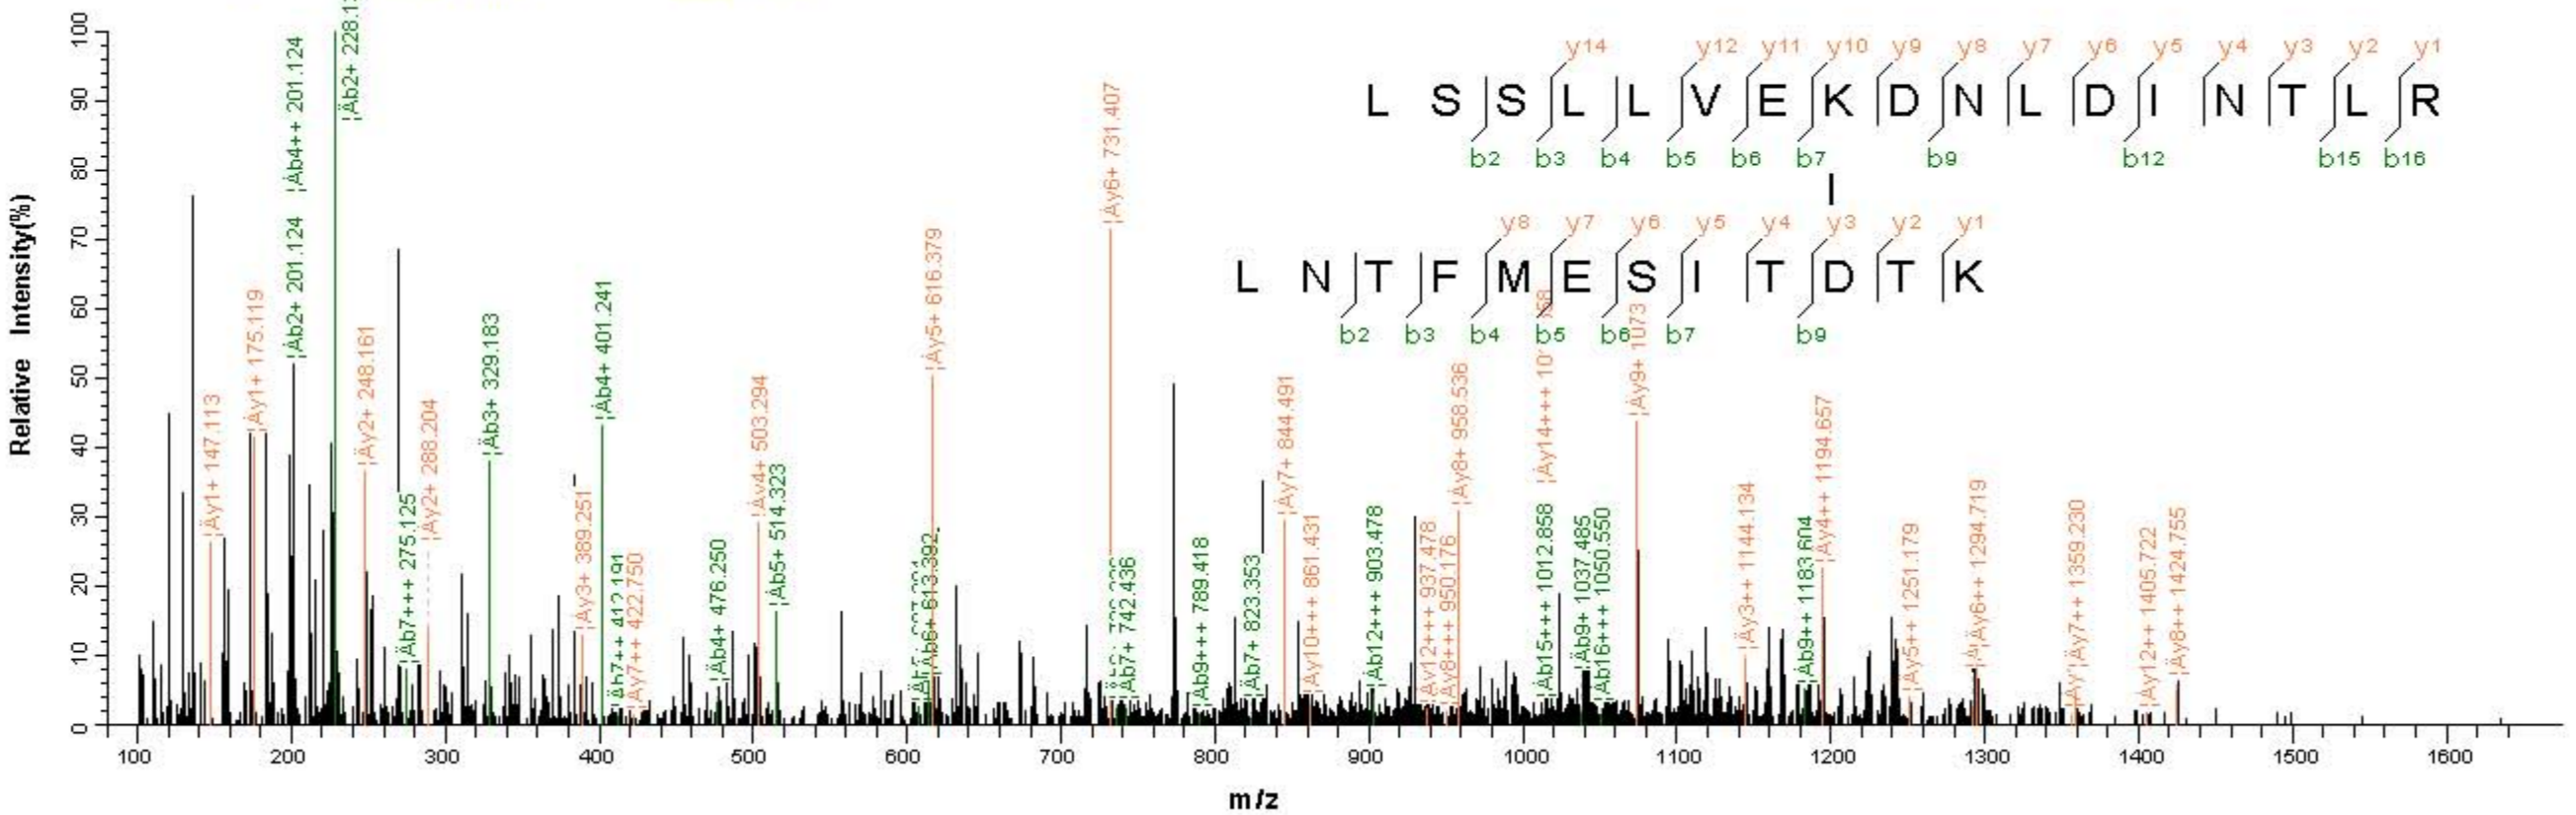

Charge: 4 MH+: 2997.4943 Score: 6.18e-009

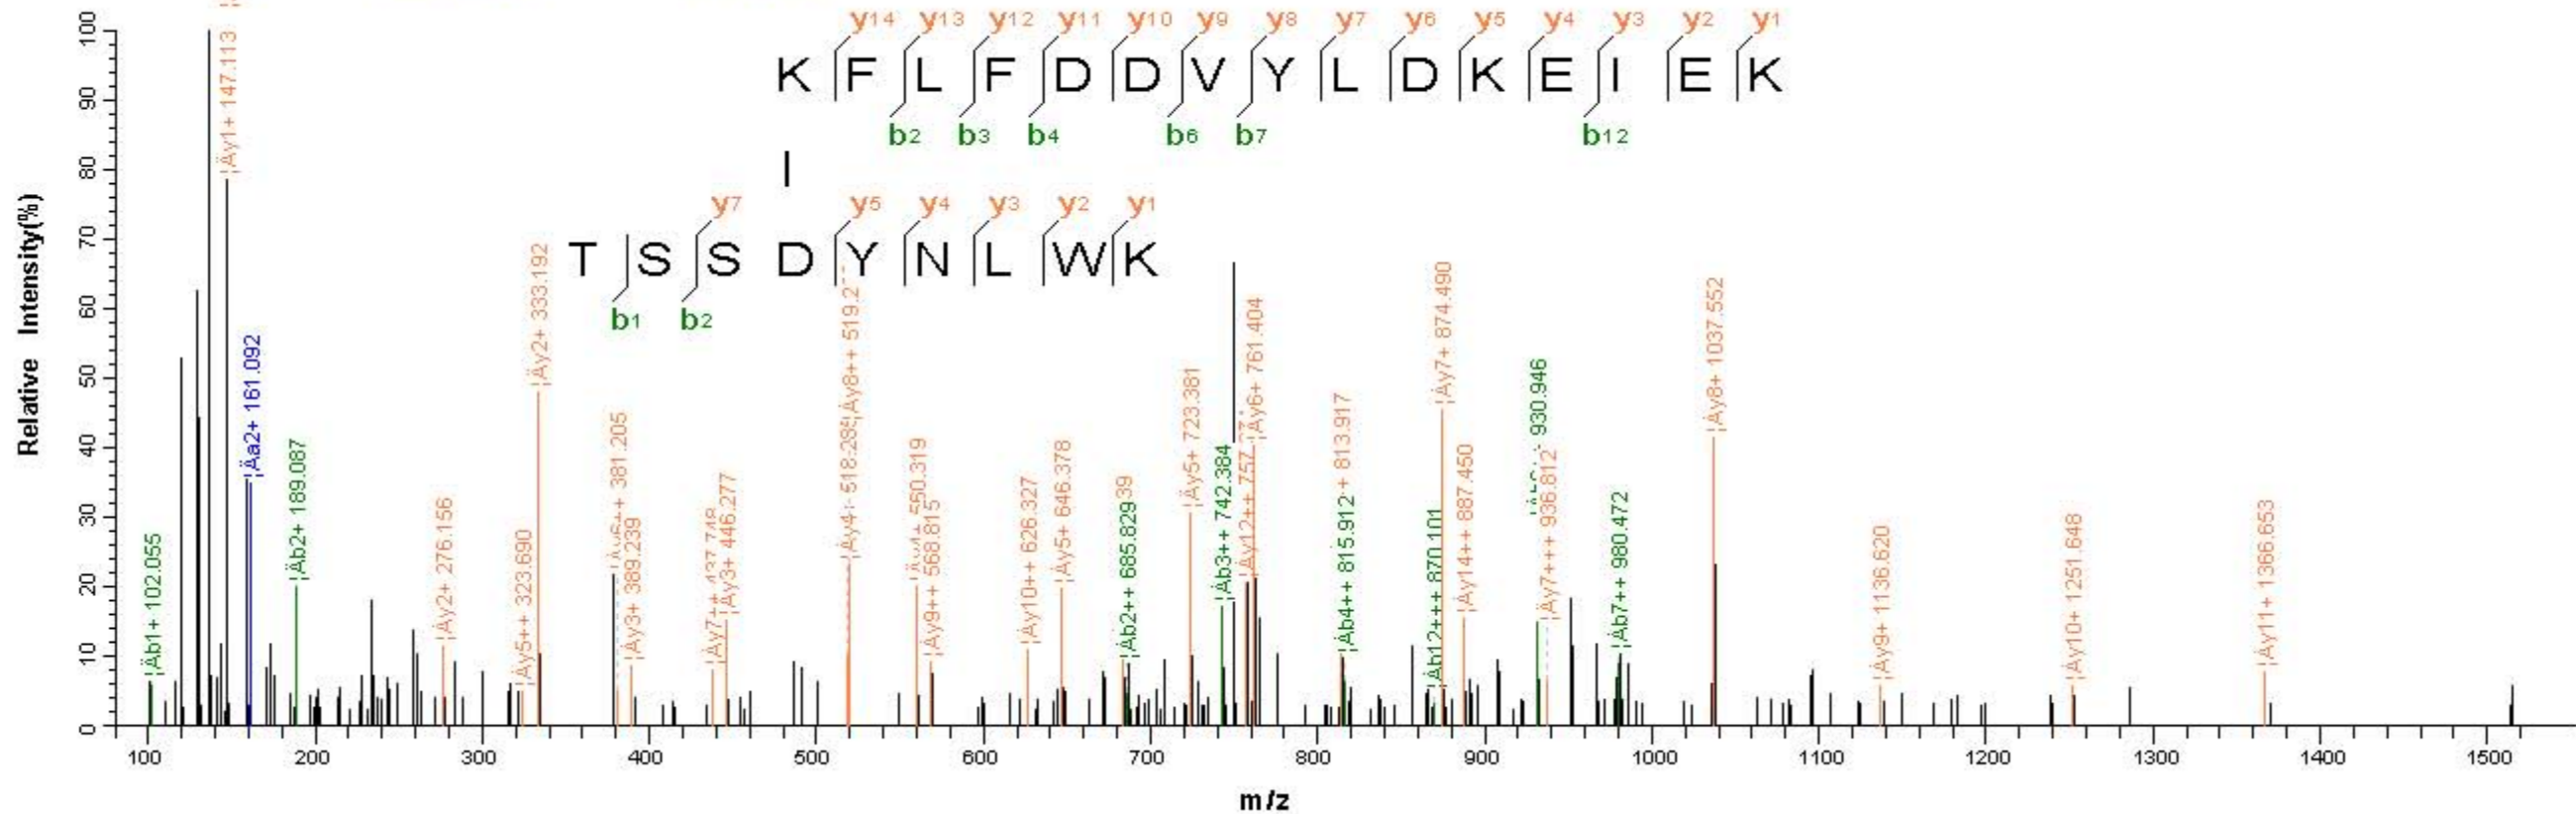

Charge: 4 MH+: 2572.3693 Score: 1.71e-012

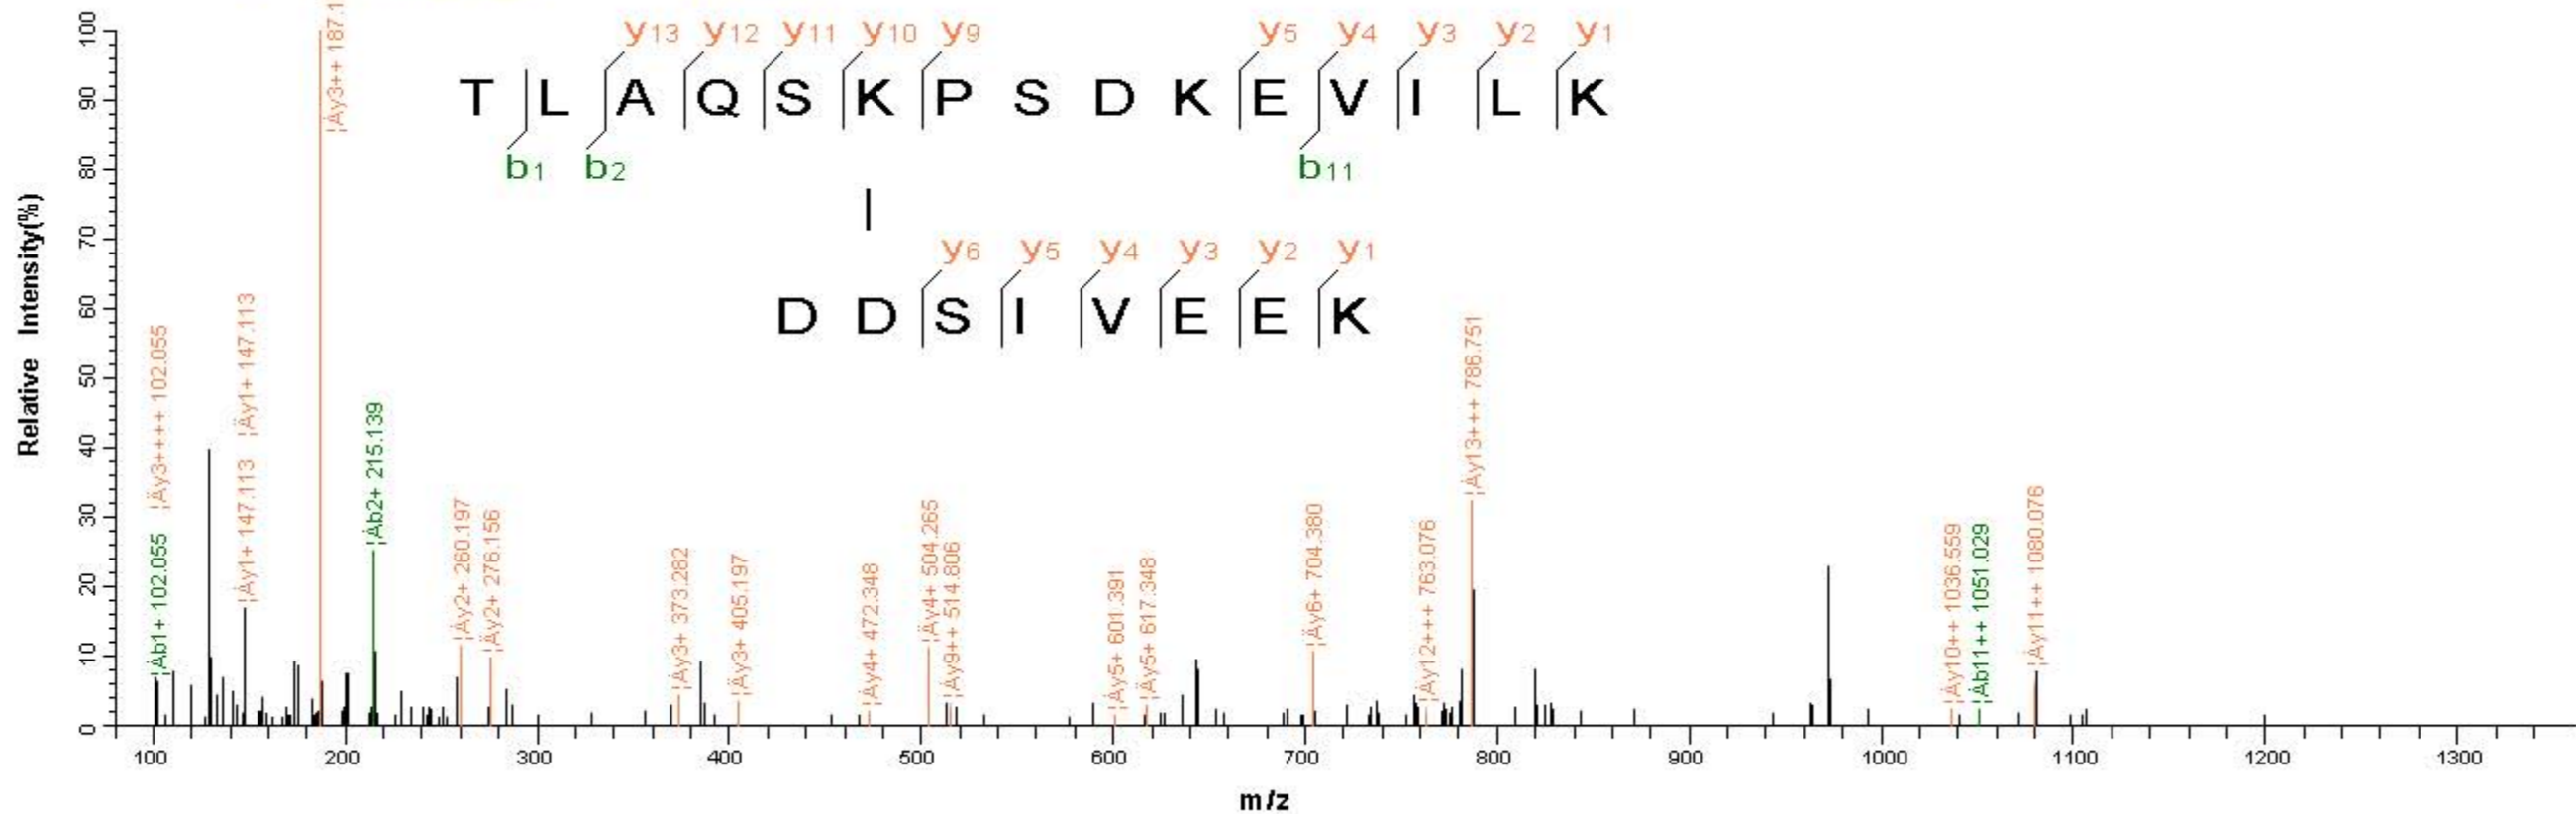

Charge: 4 MH+: 2348.2821 Score: 2.93e-003

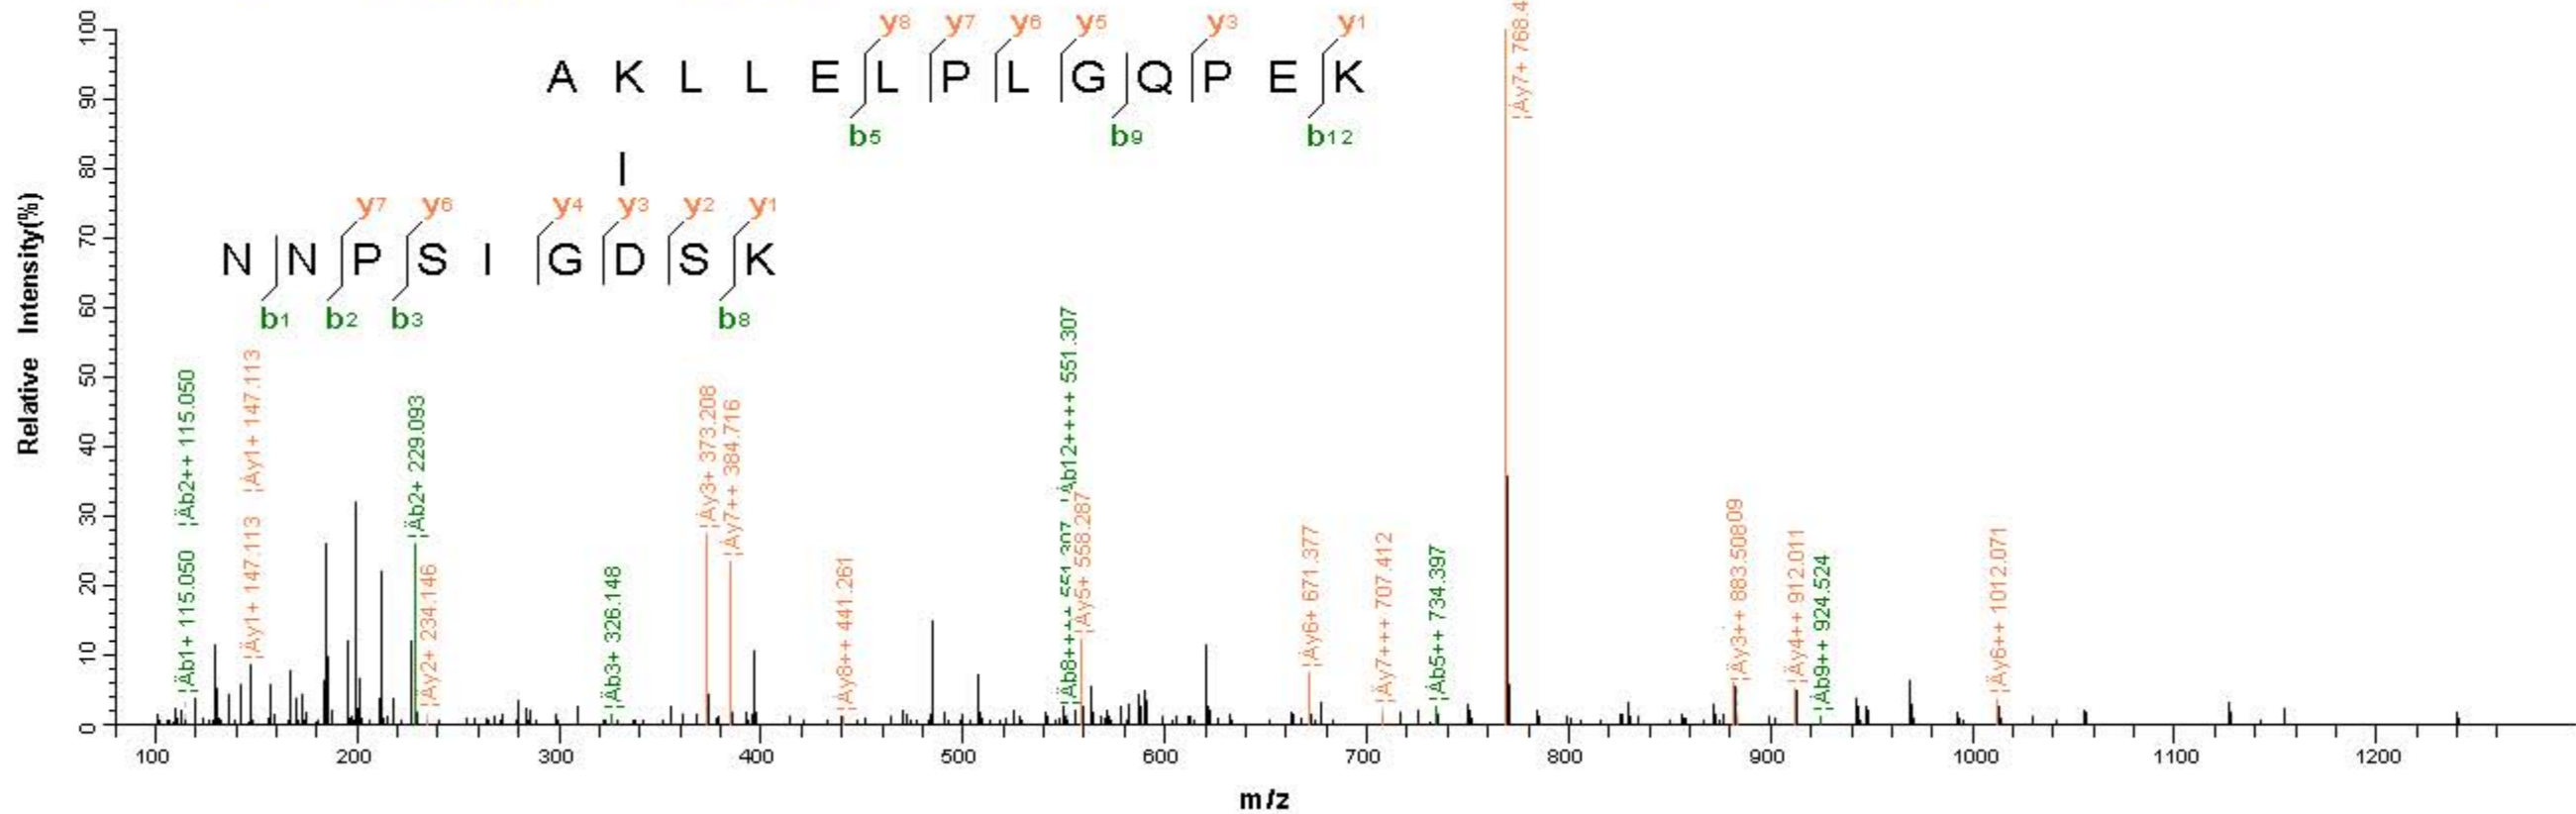

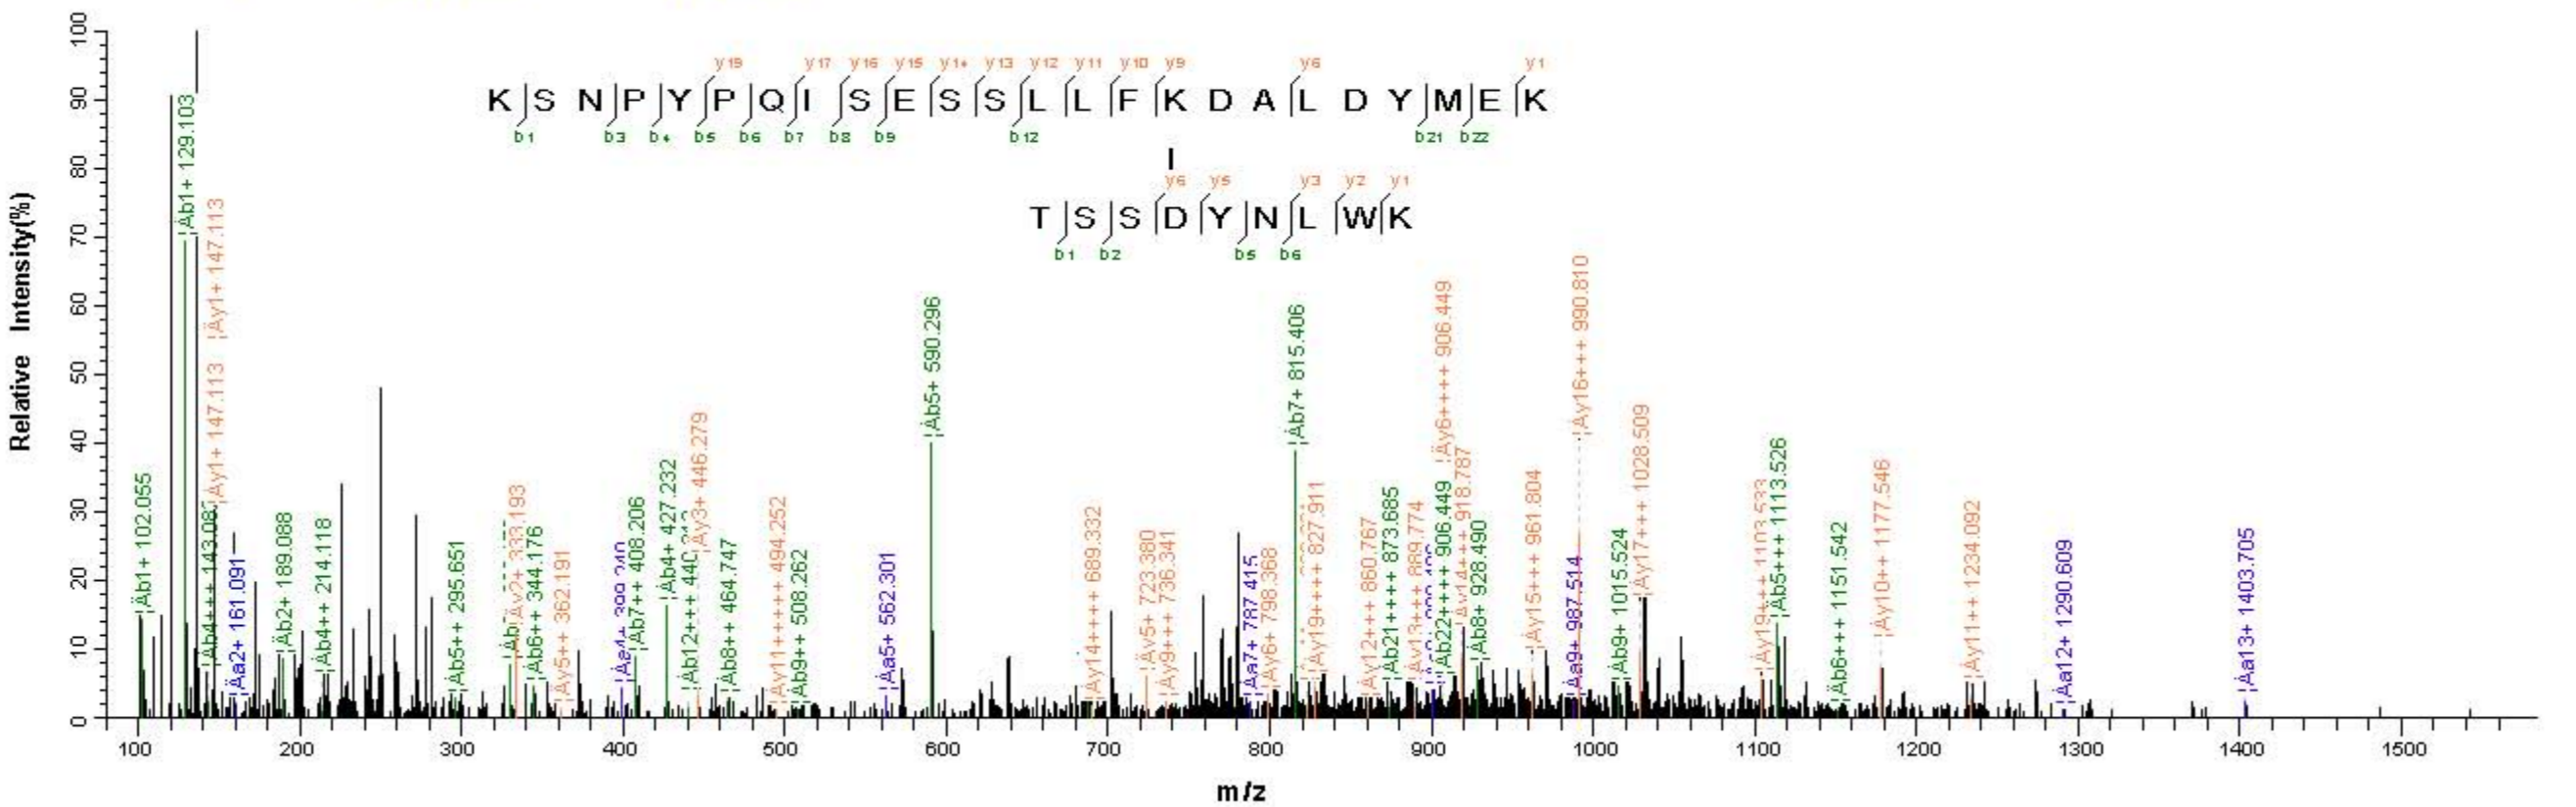

Charge: 6 MH+: 7031.1633 Score: 8.27e-009

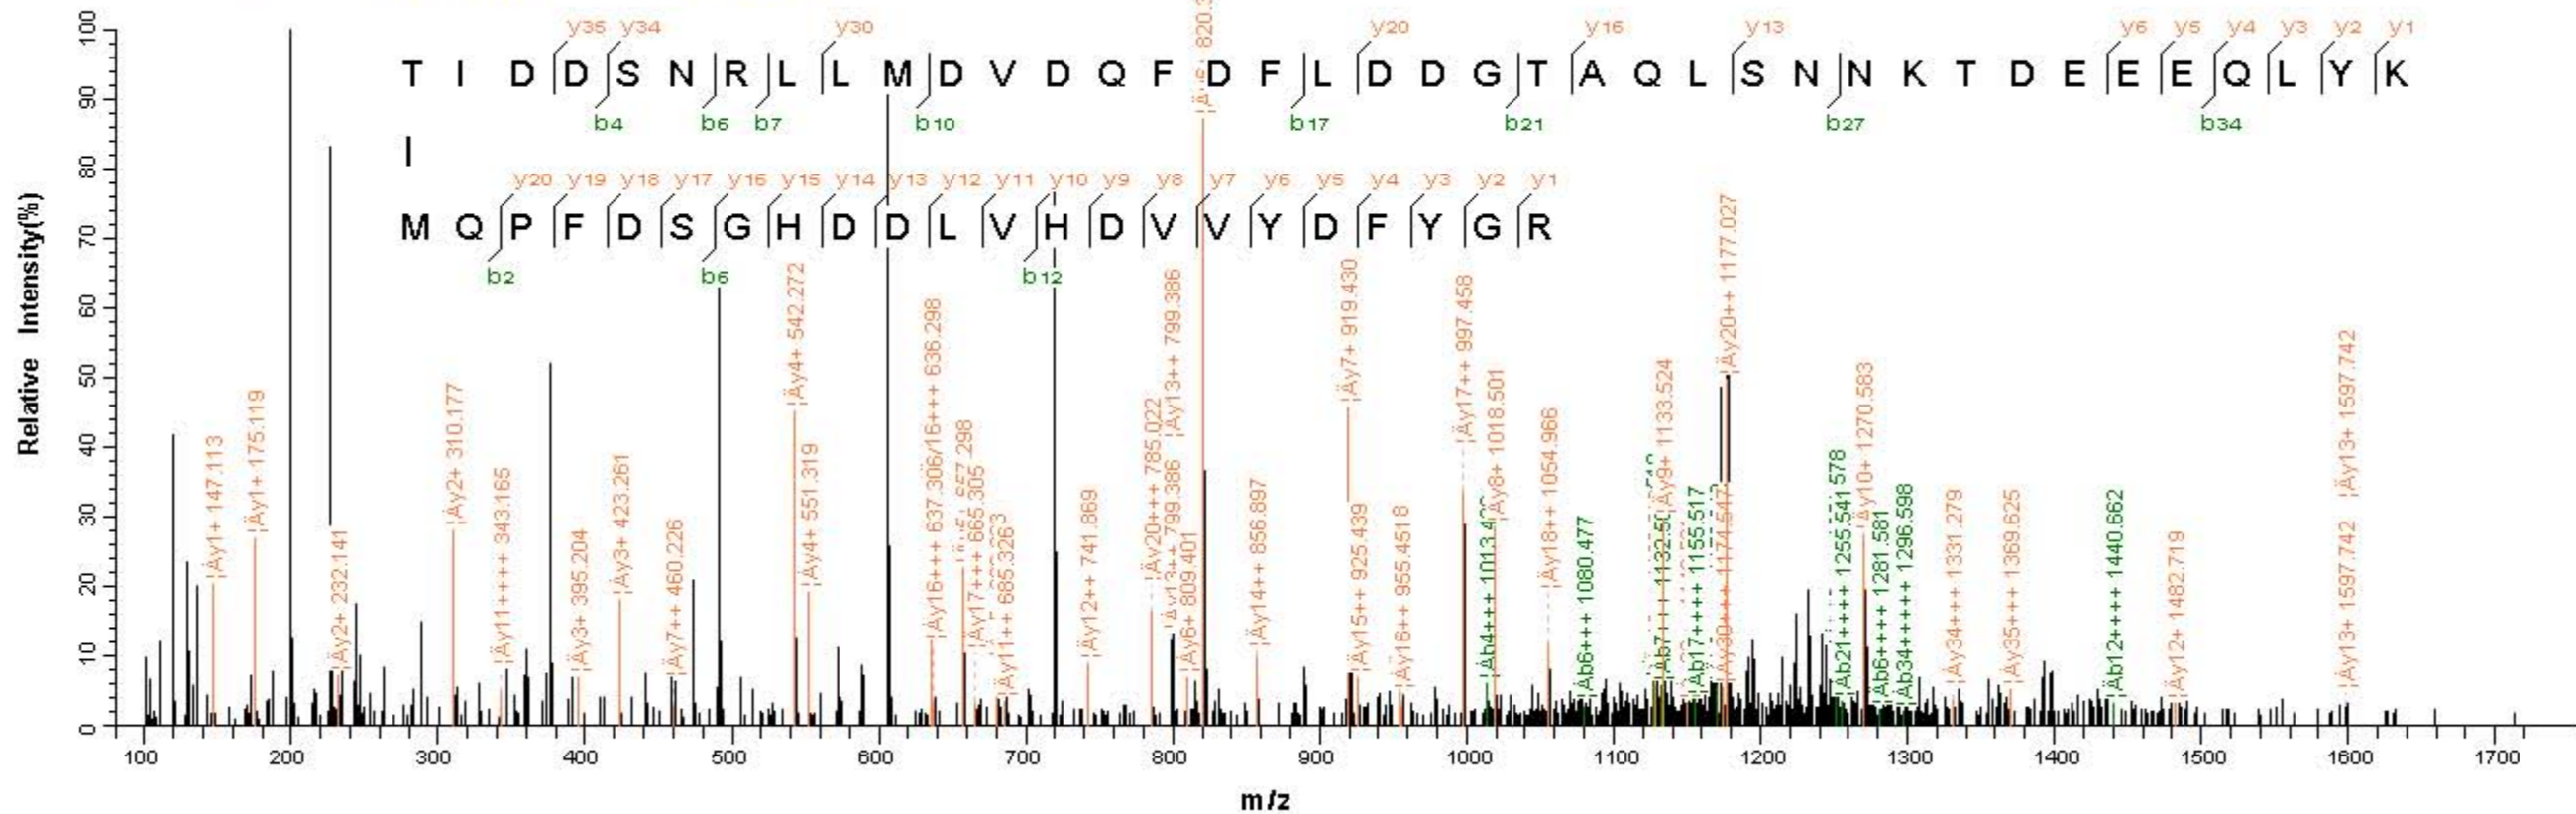

Charge: 5 MH+: 3072.6024 Score: 4.08e-010

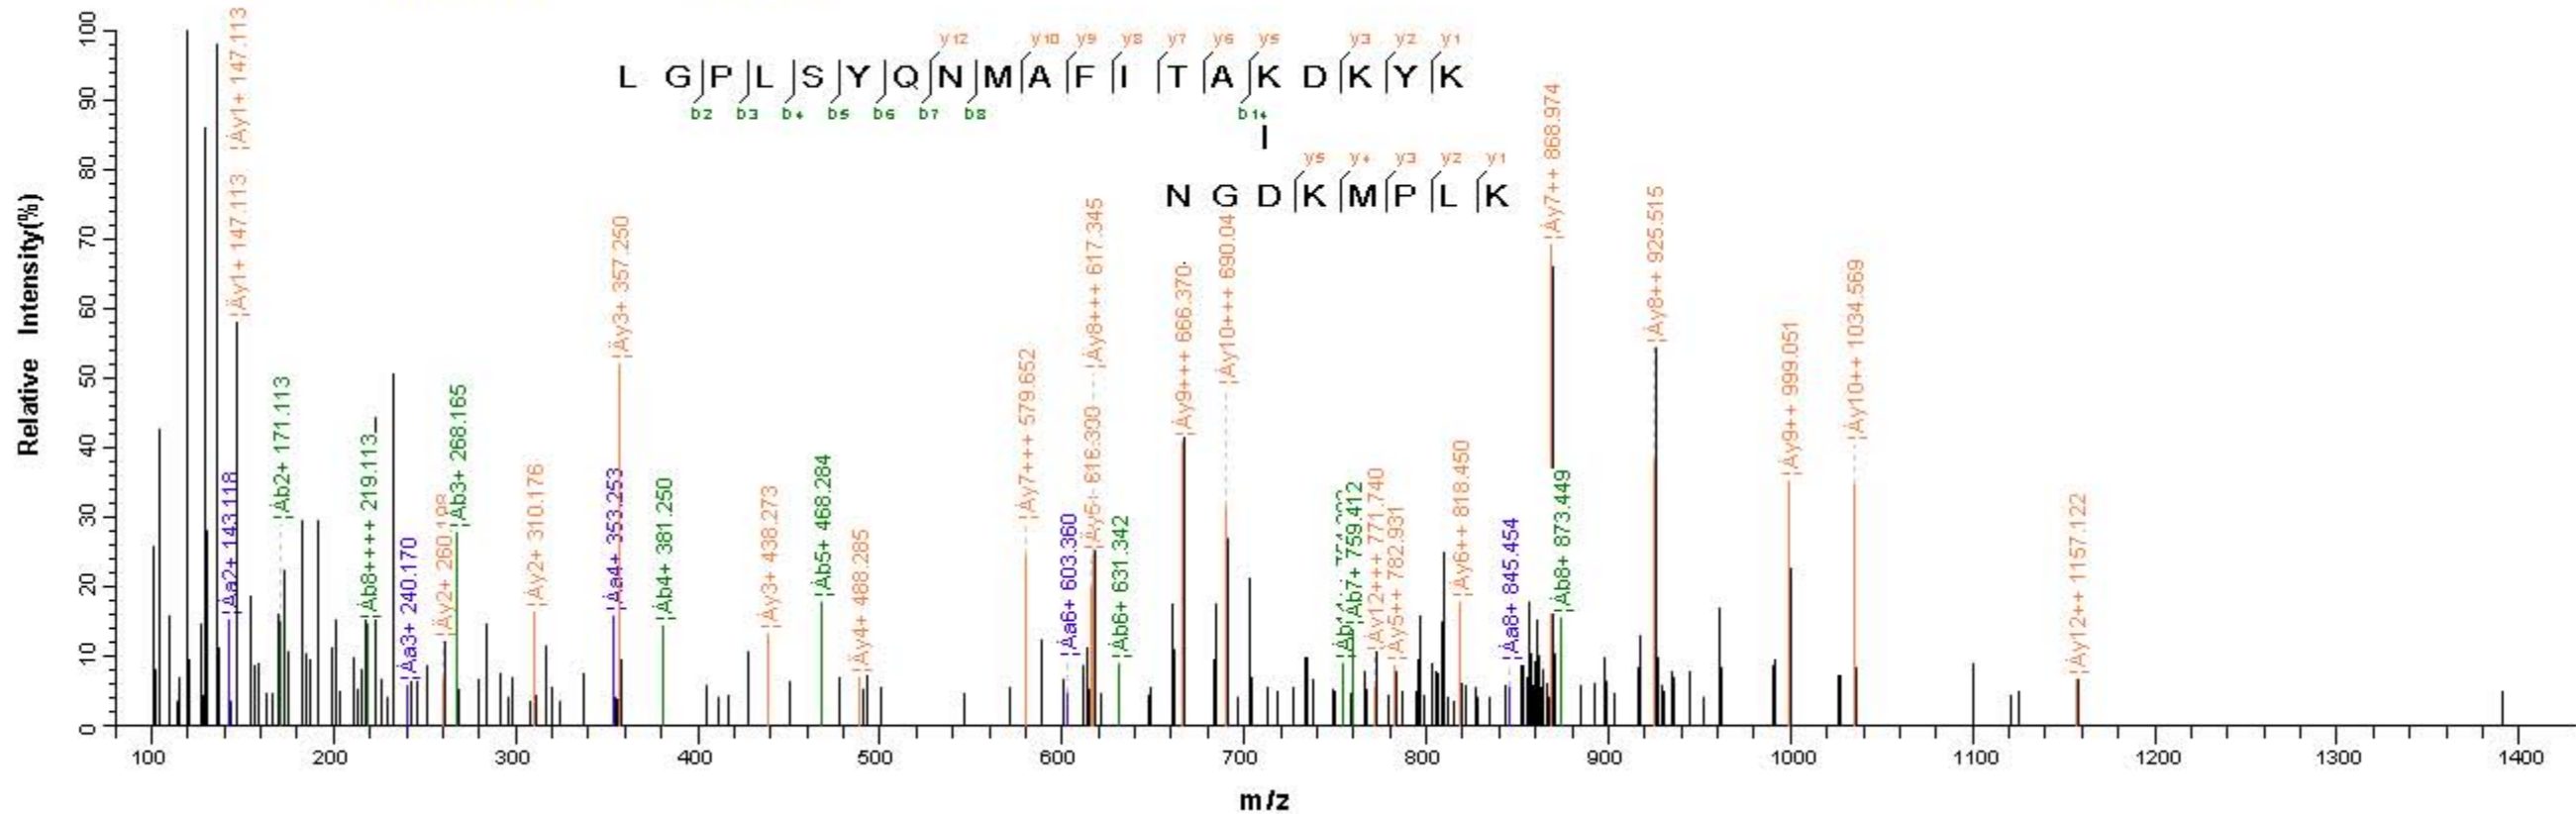



Charge: 6 MH+: 4787.5050 Score: 1.16e-011

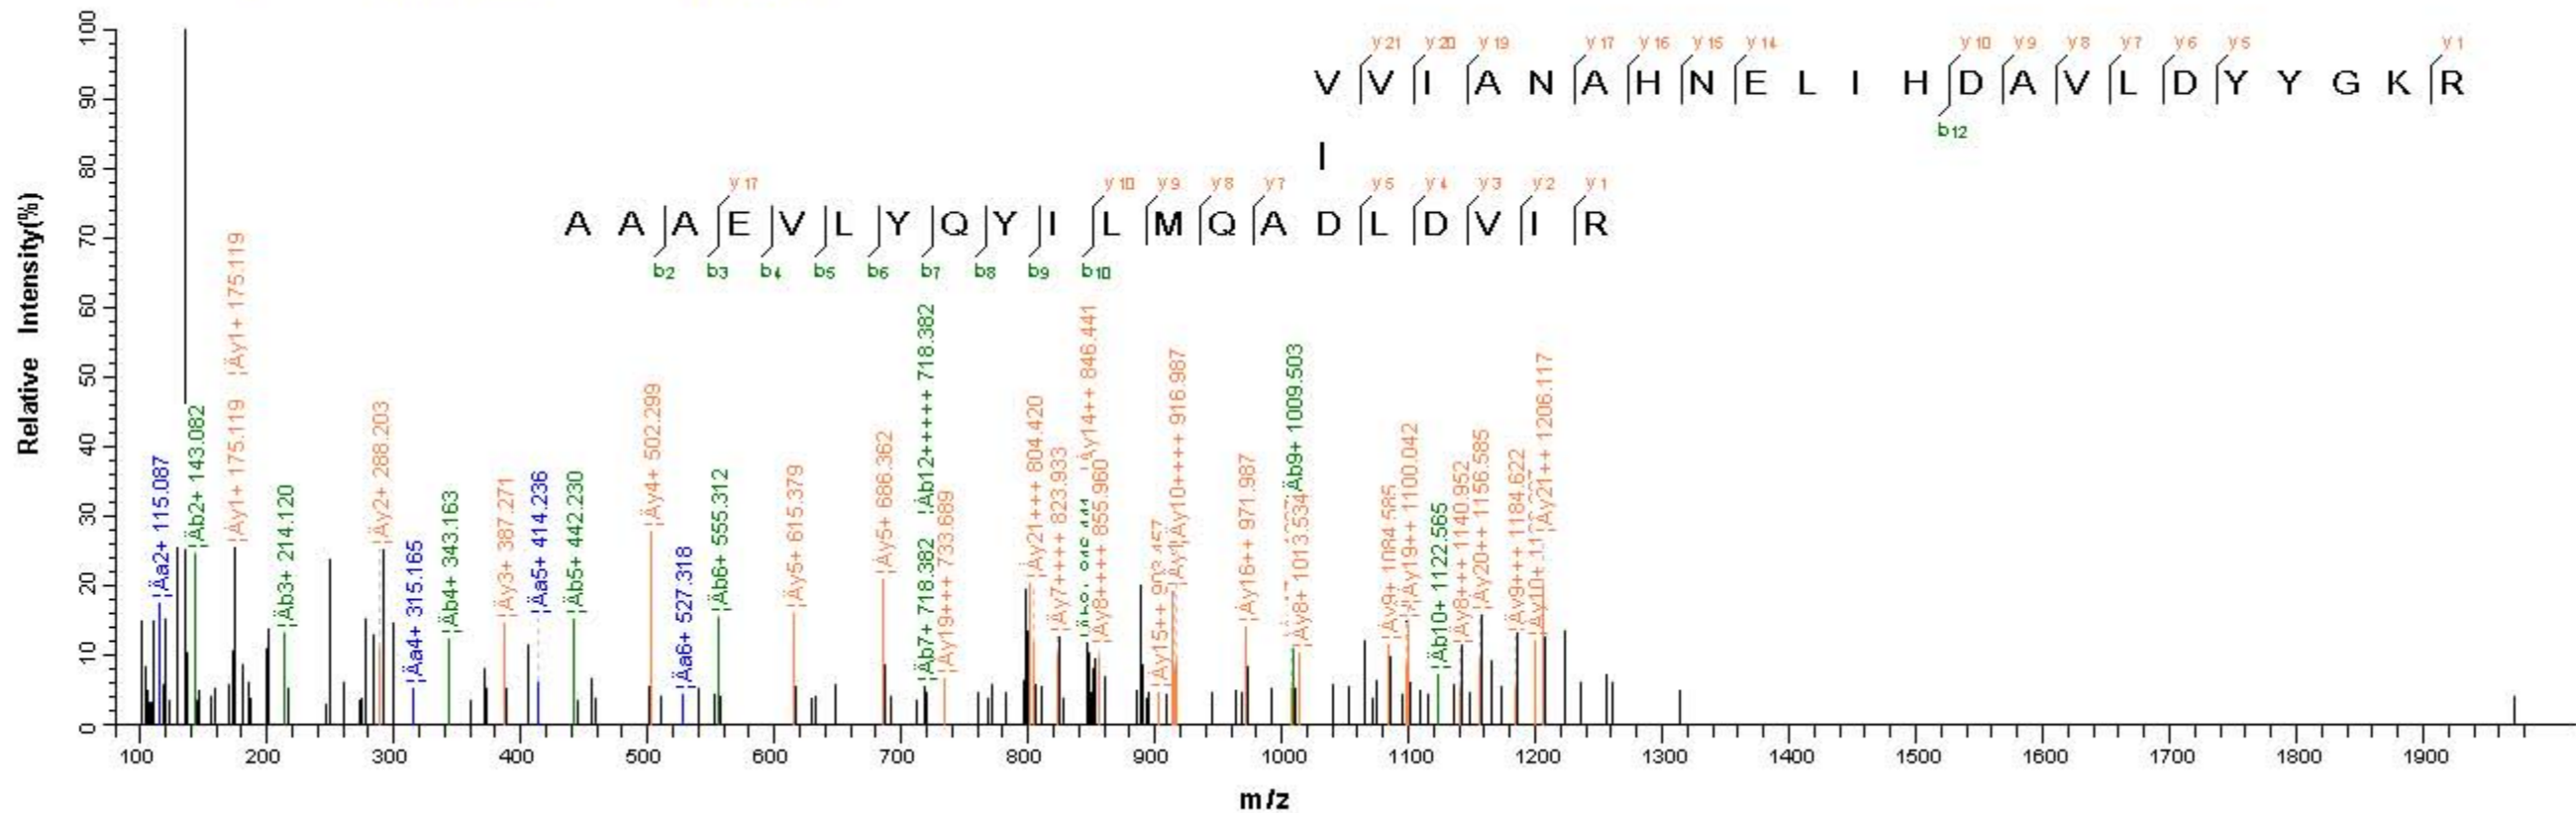

Charge: 5 MH+: 3628.8438 Score: 3.33e-006

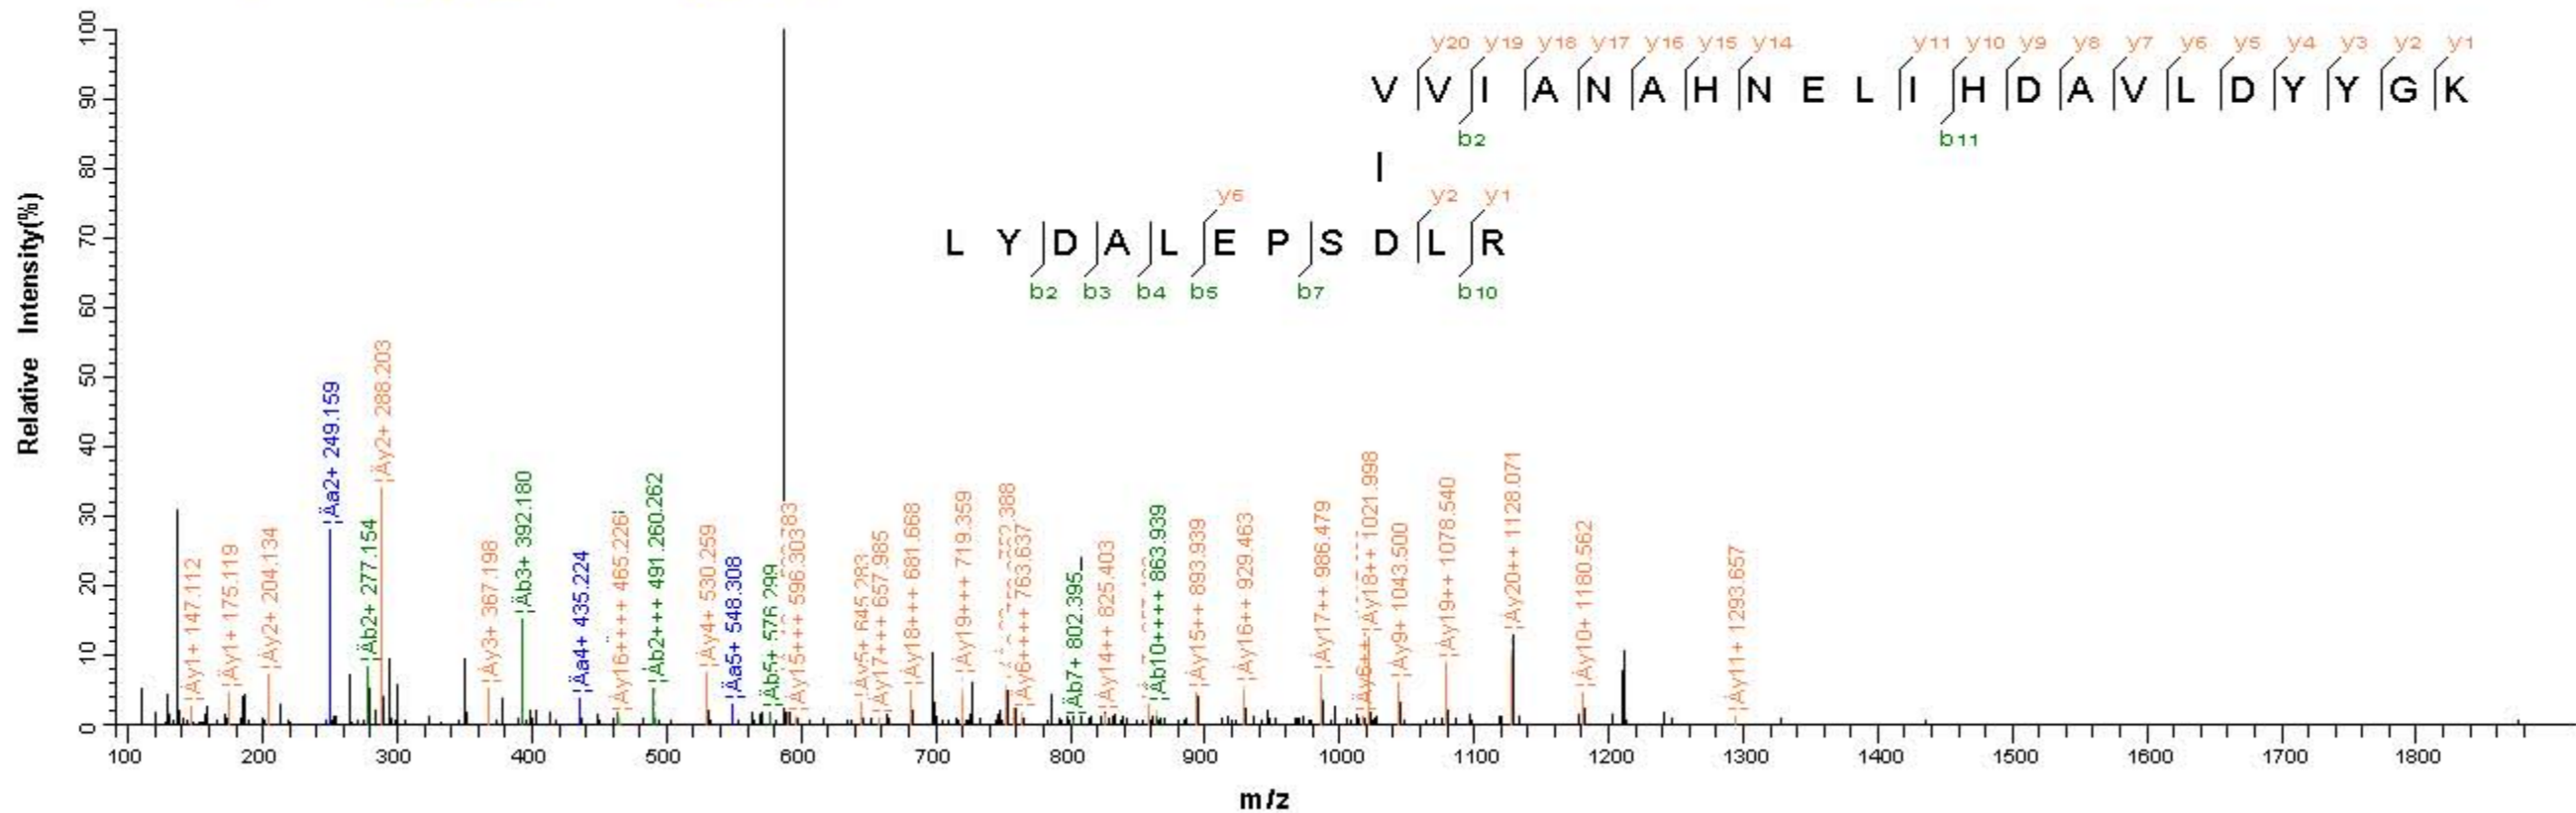

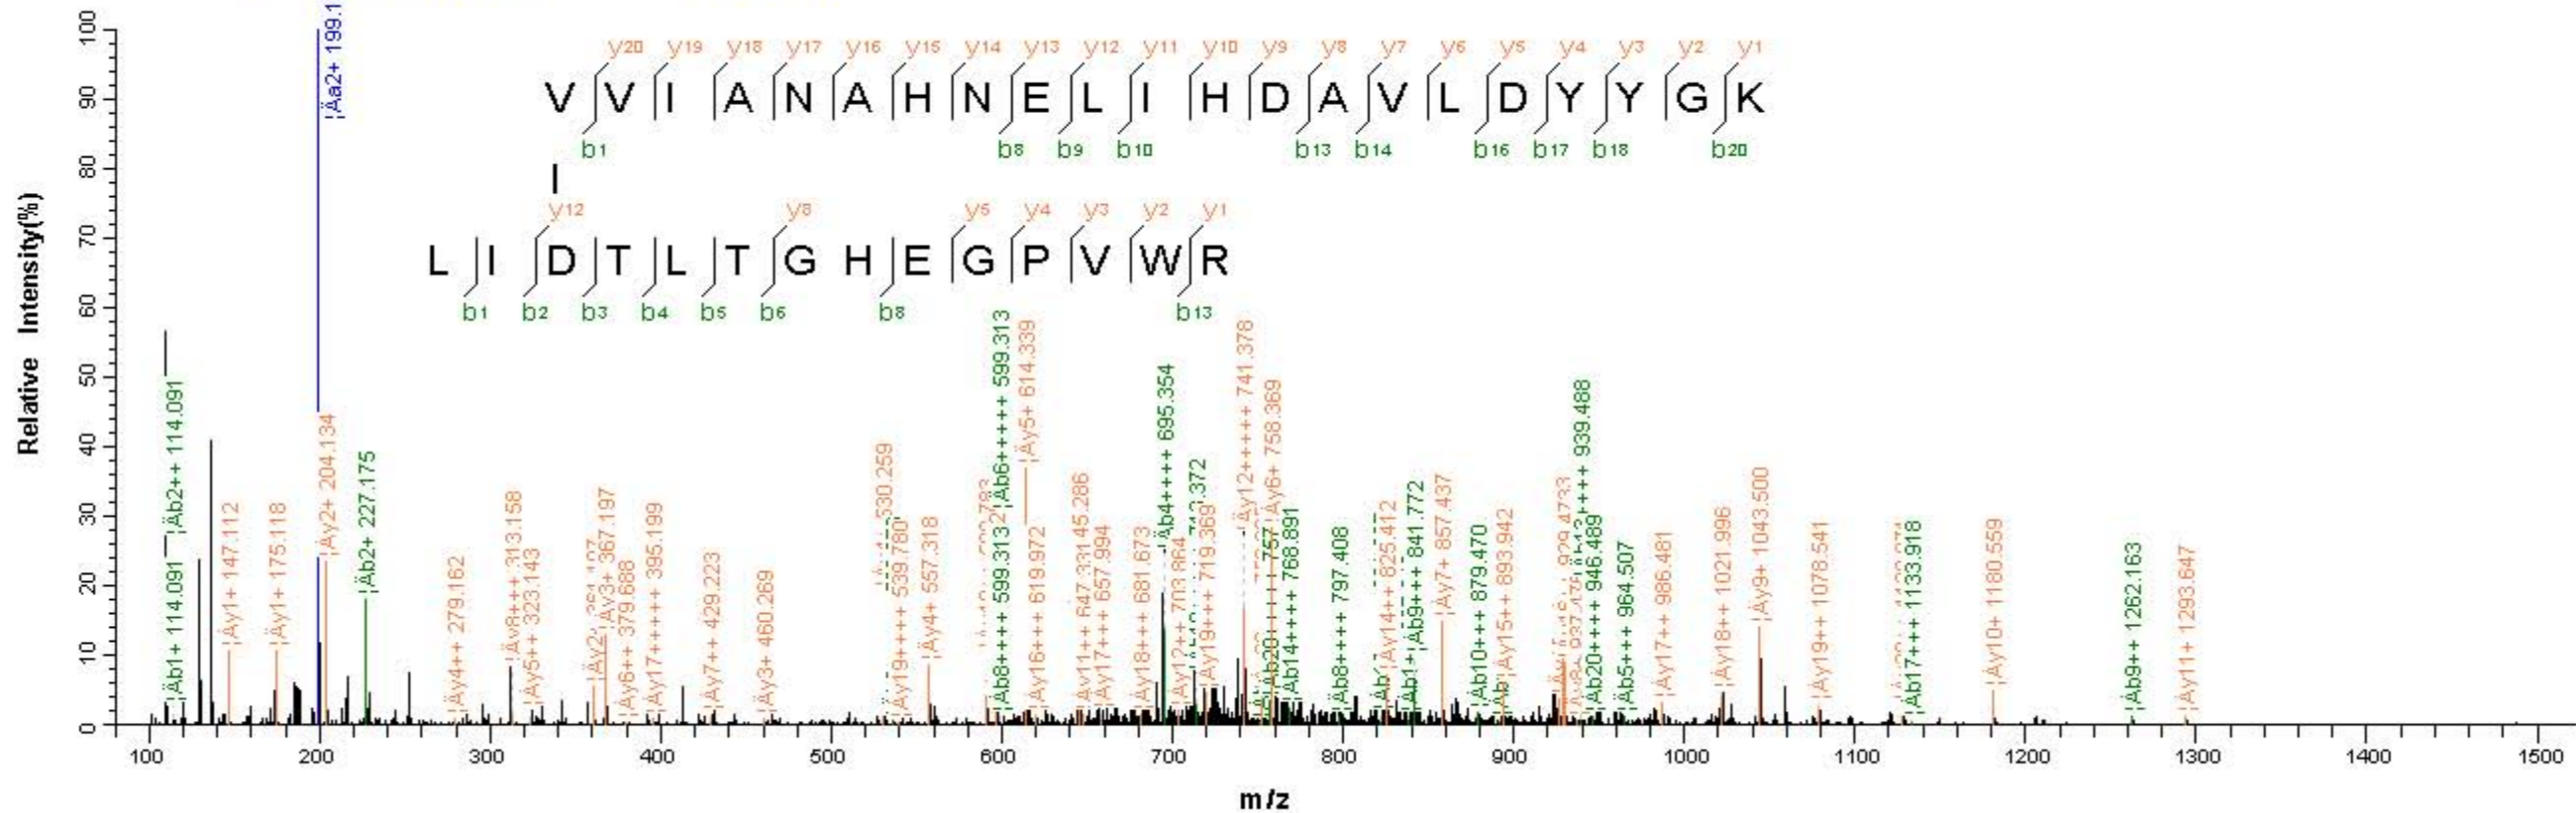

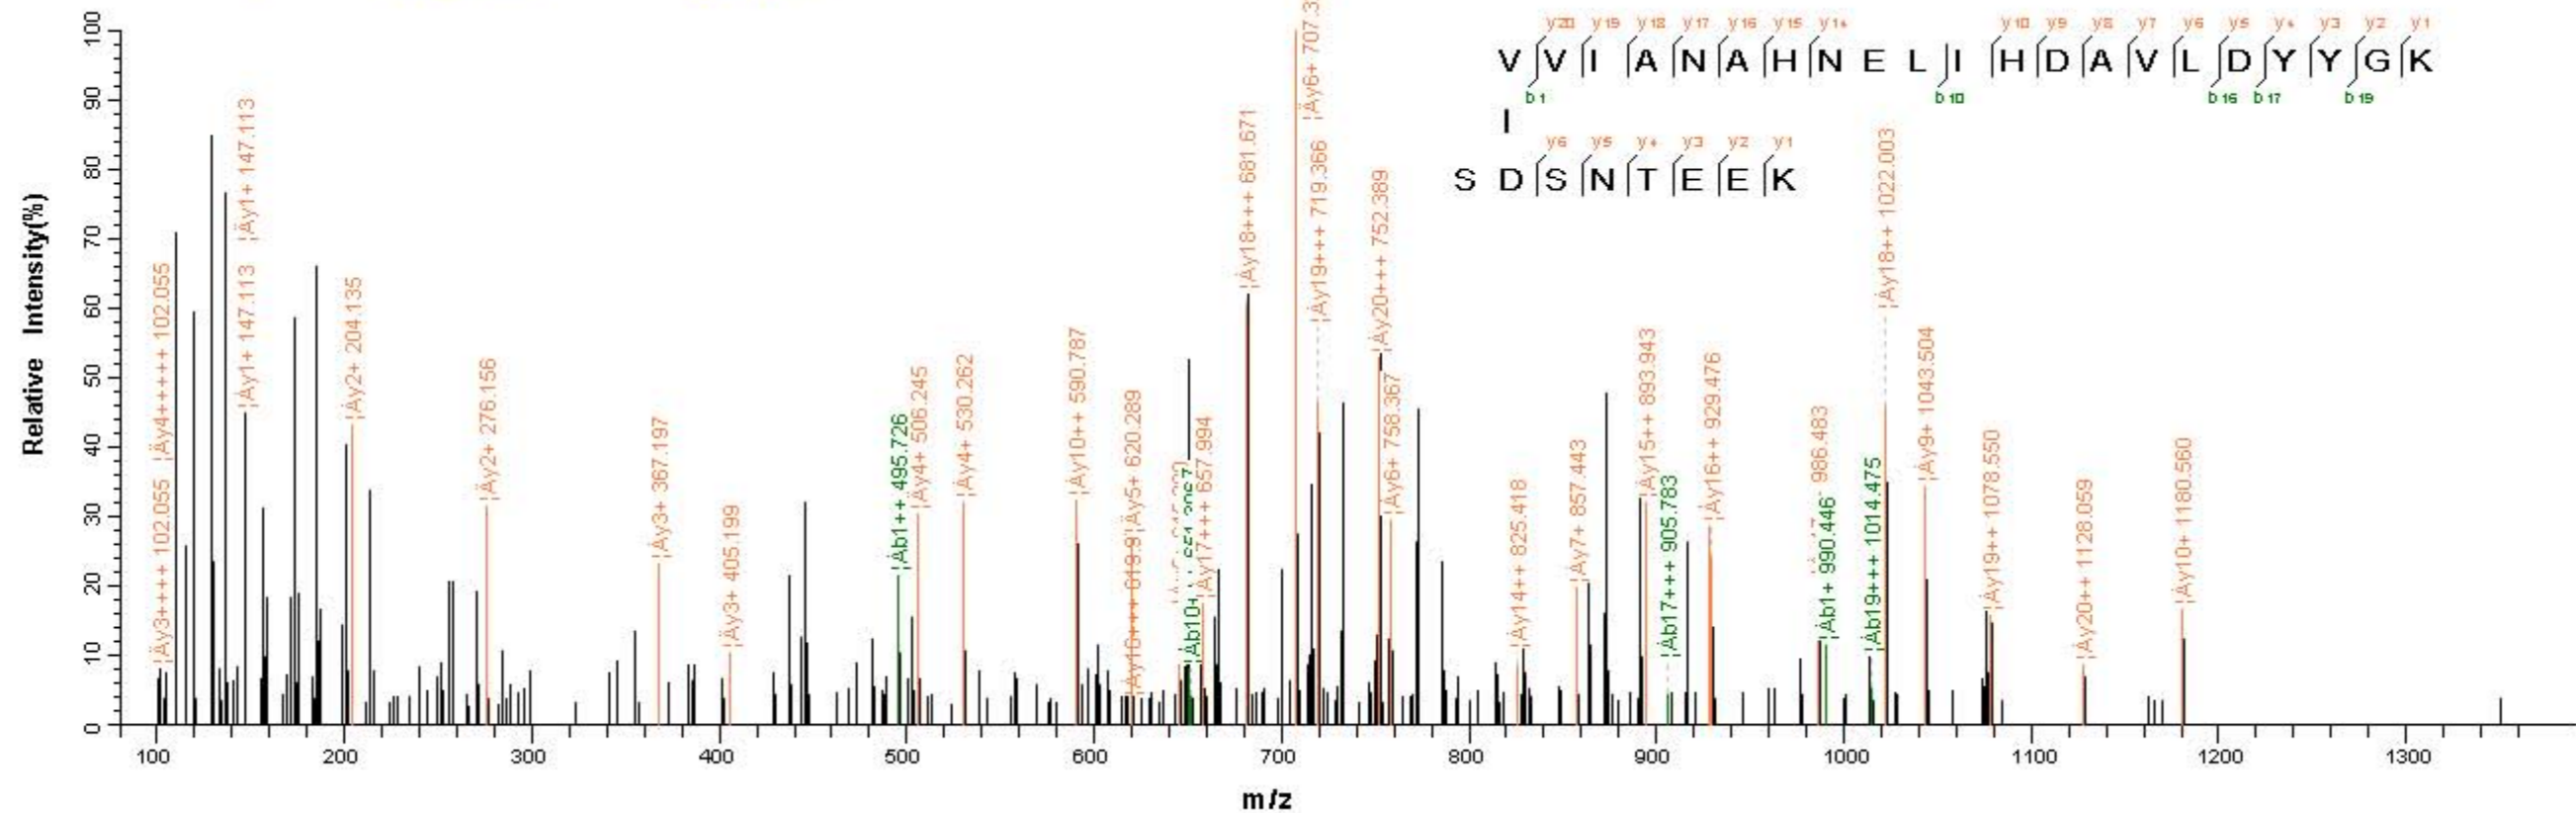

Charge: 5 MH+: 3414.5146 Score: 7.61e-004

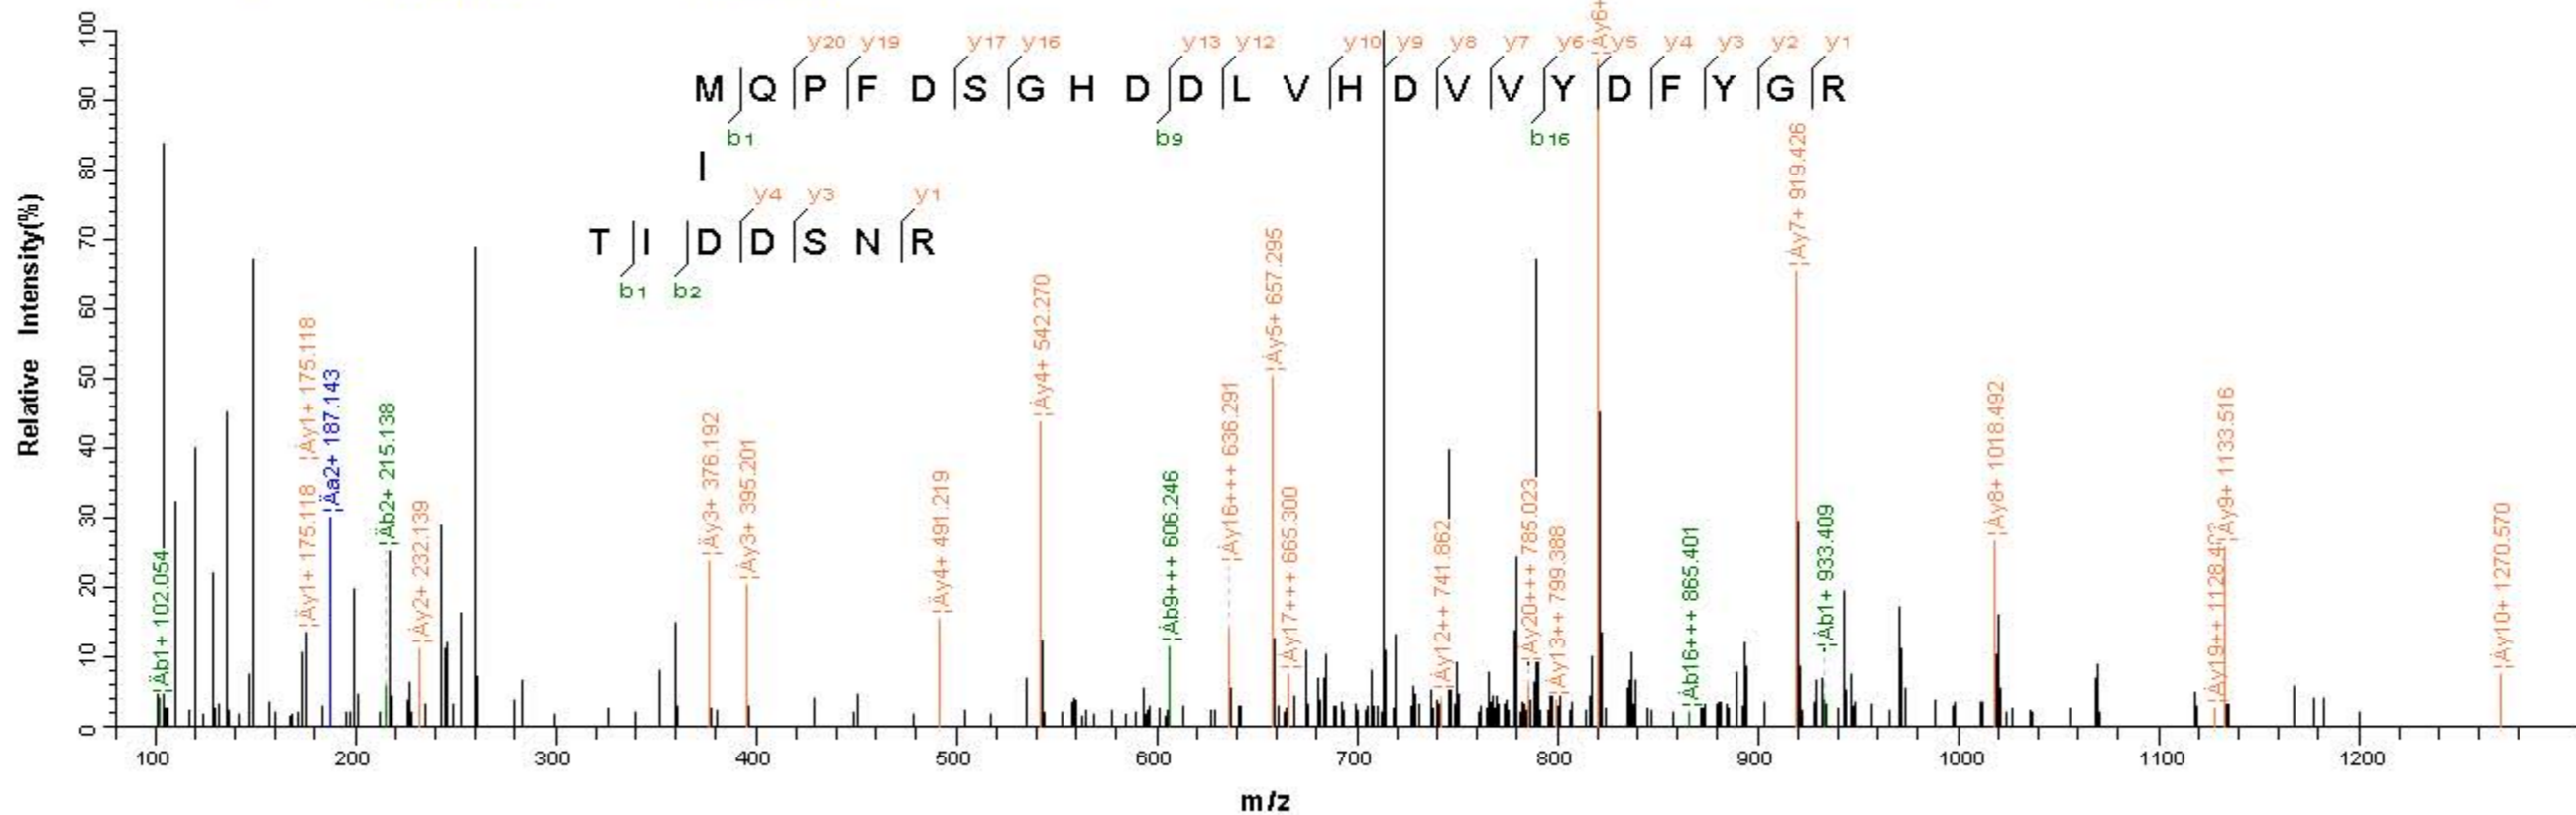

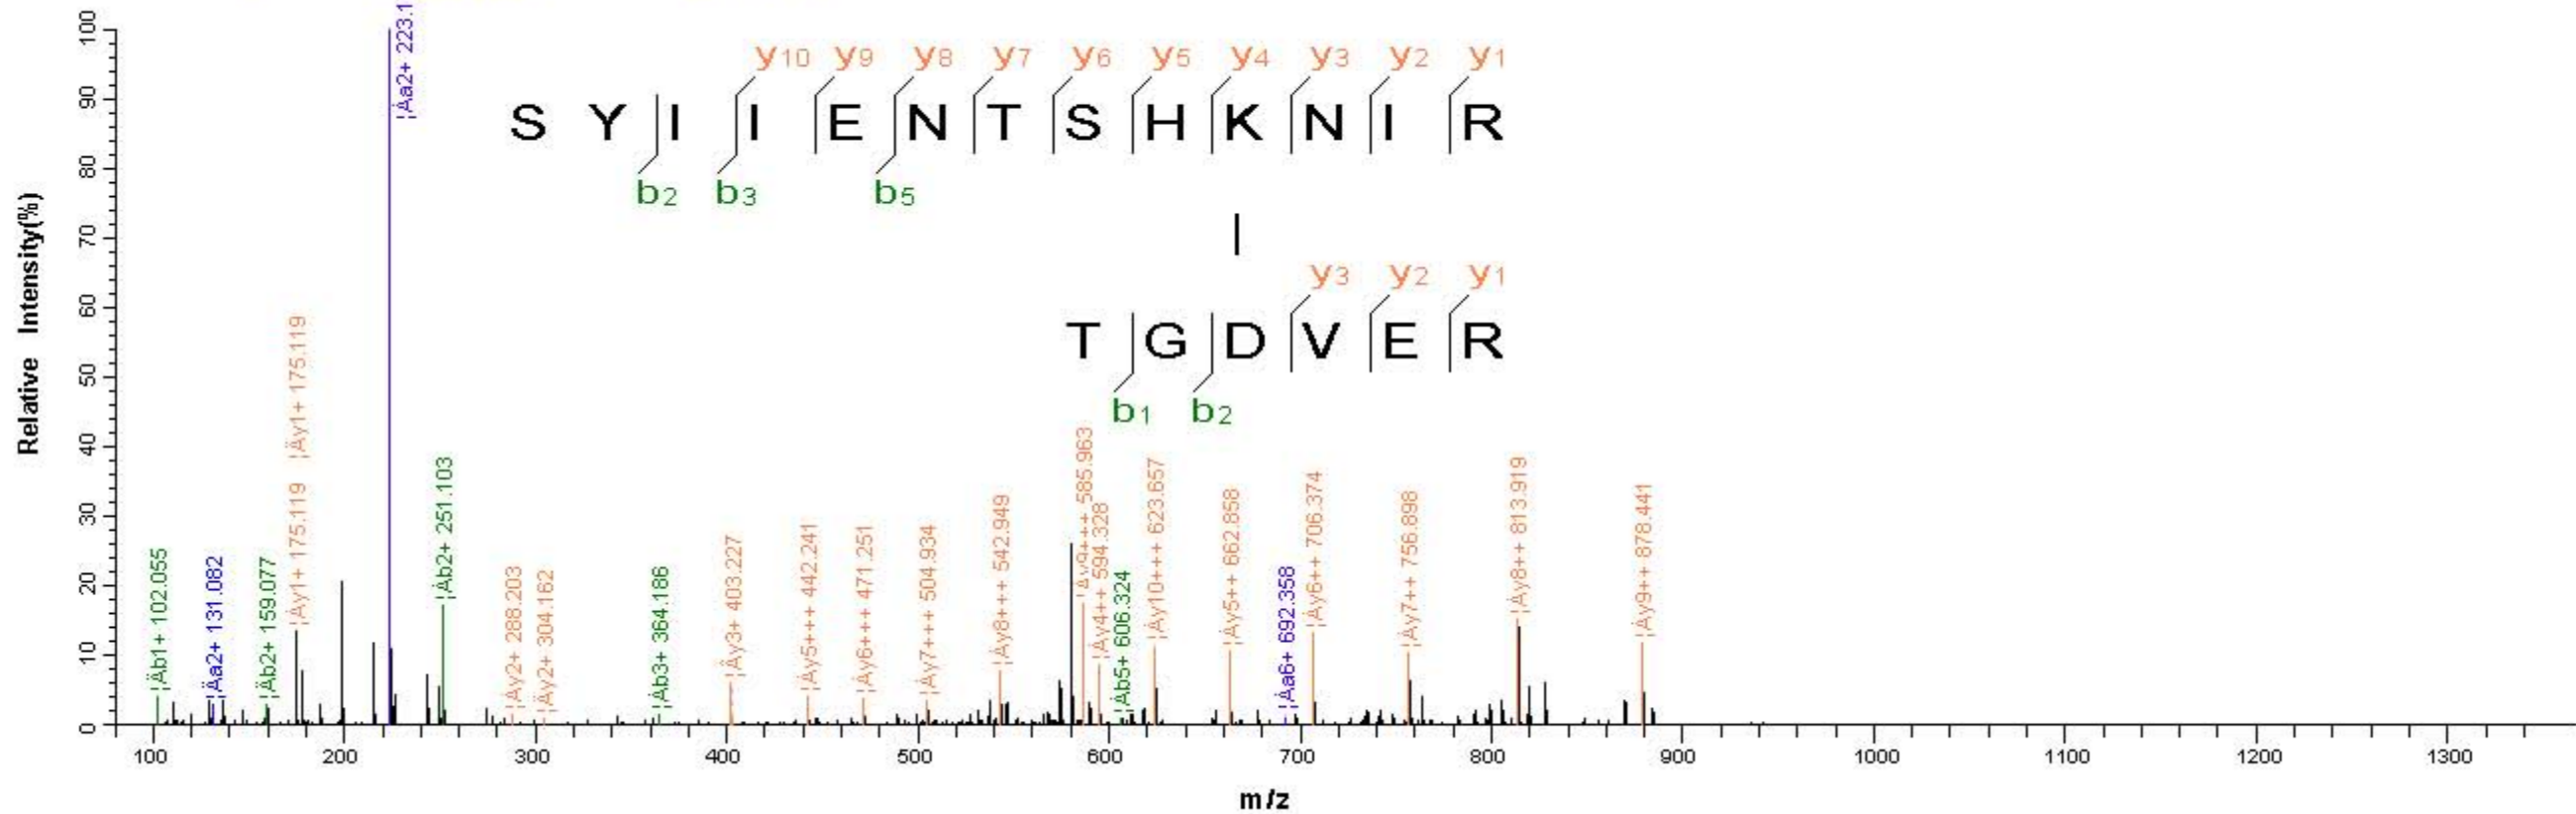

Charge: 6 MH+: 3933.0741 Score: 3.12e-004

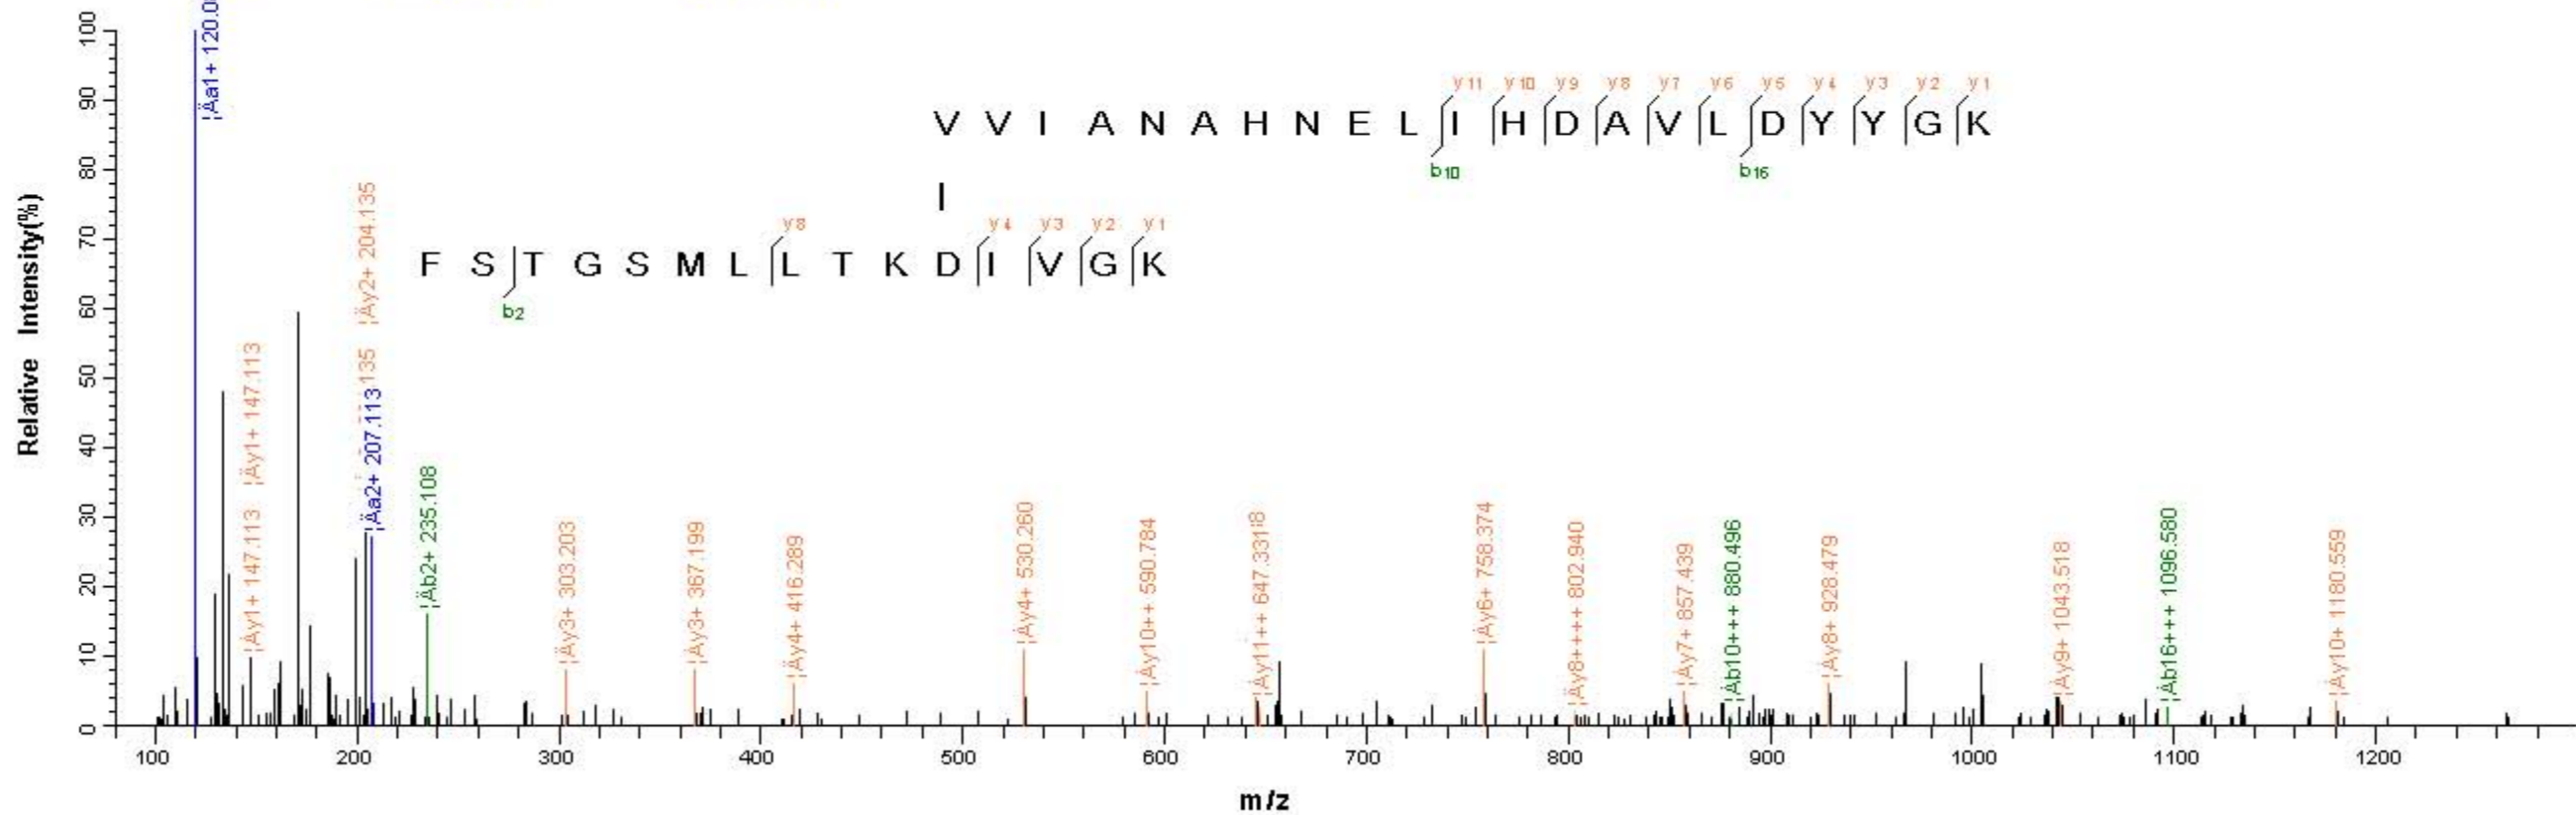

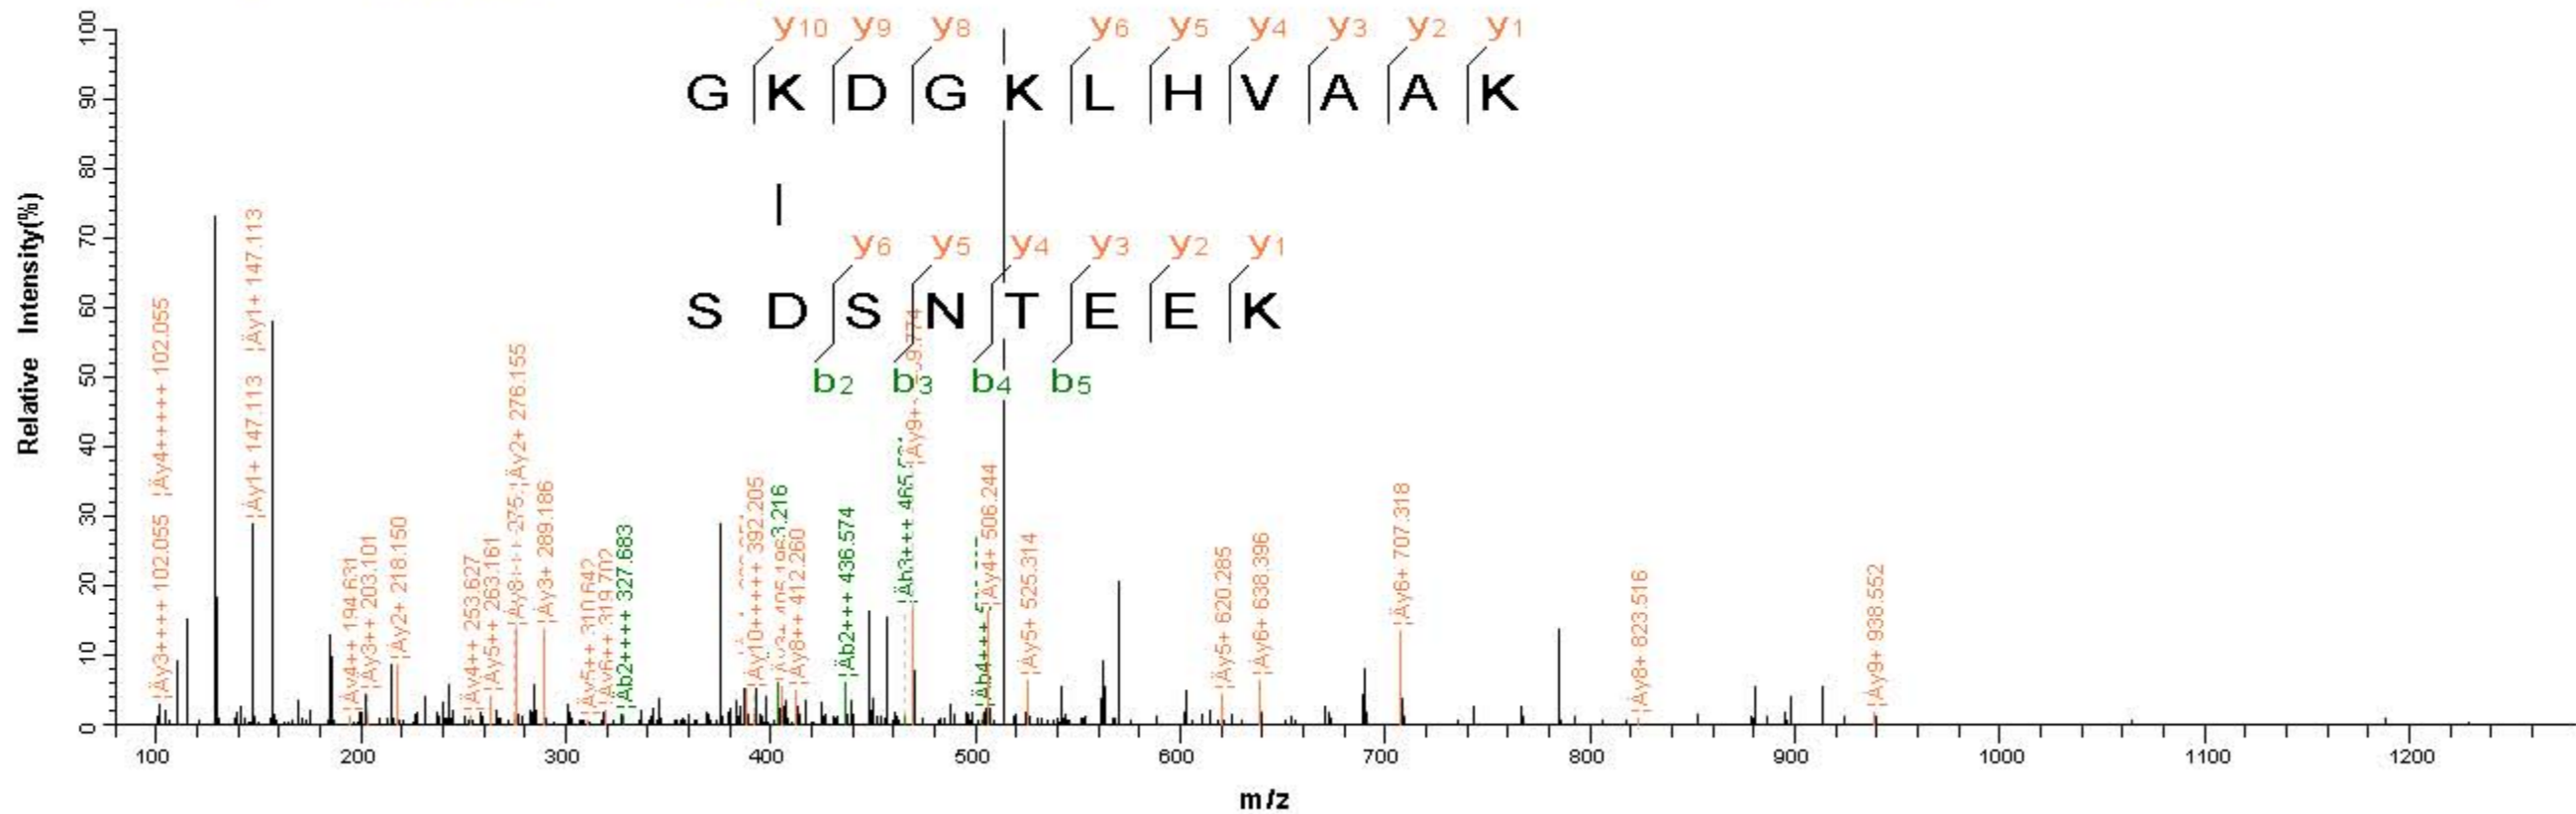



Charge: 4 MH+: 1828.9037 Score: 1.23e-006

Relative Intensity(%)

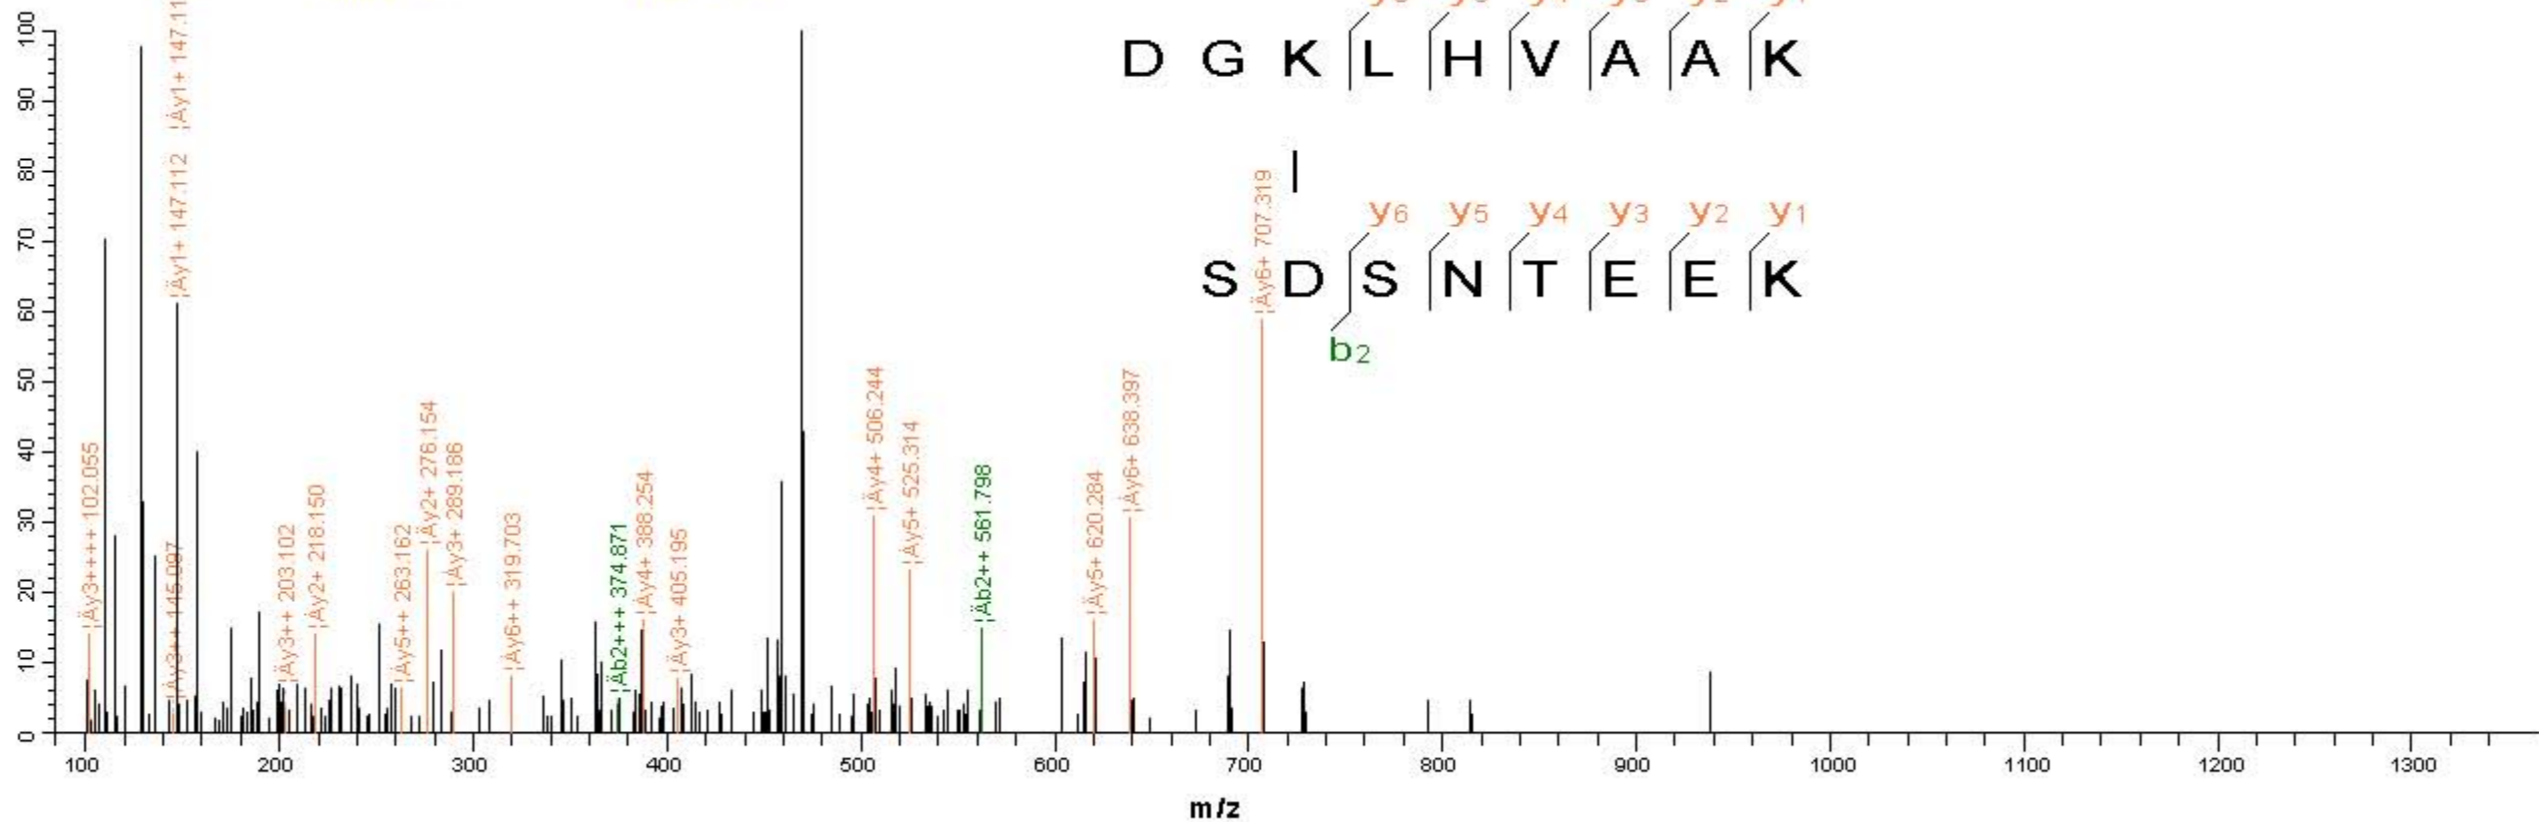

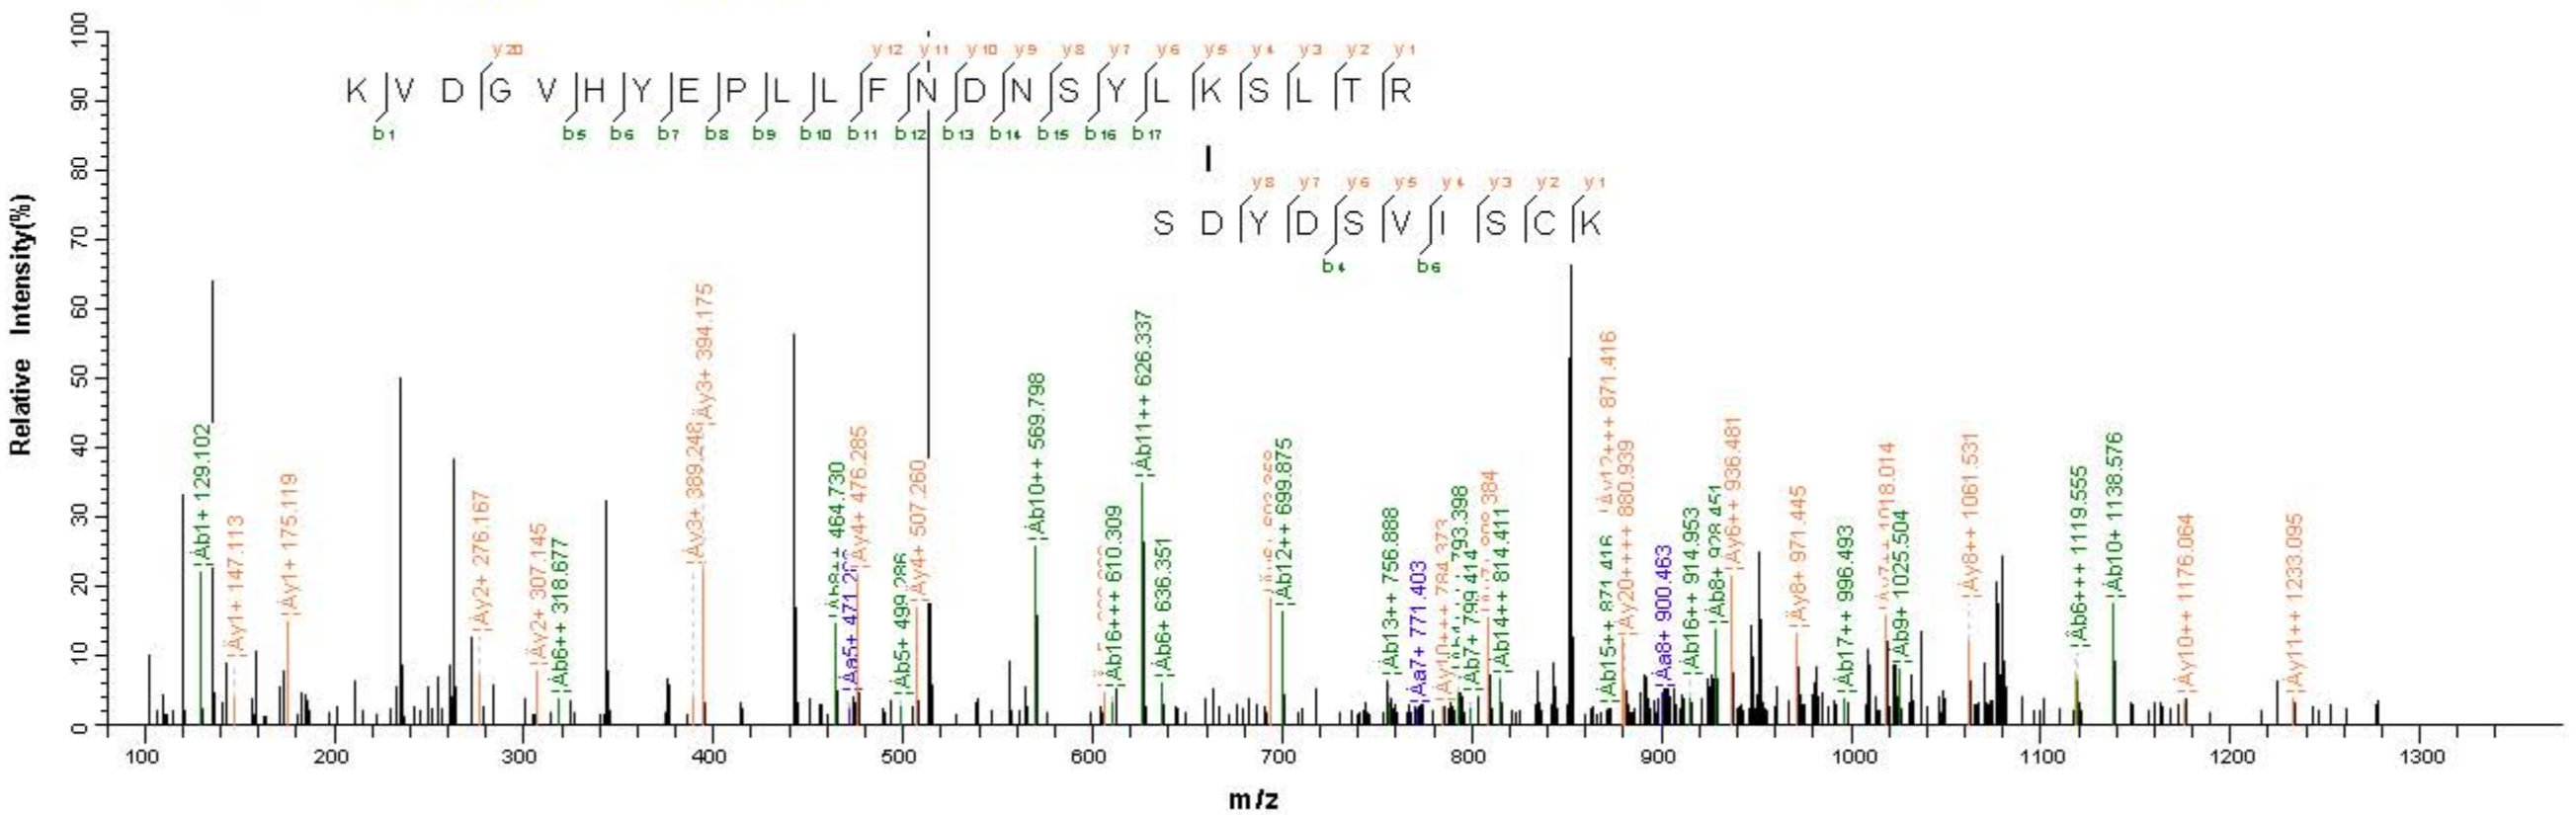

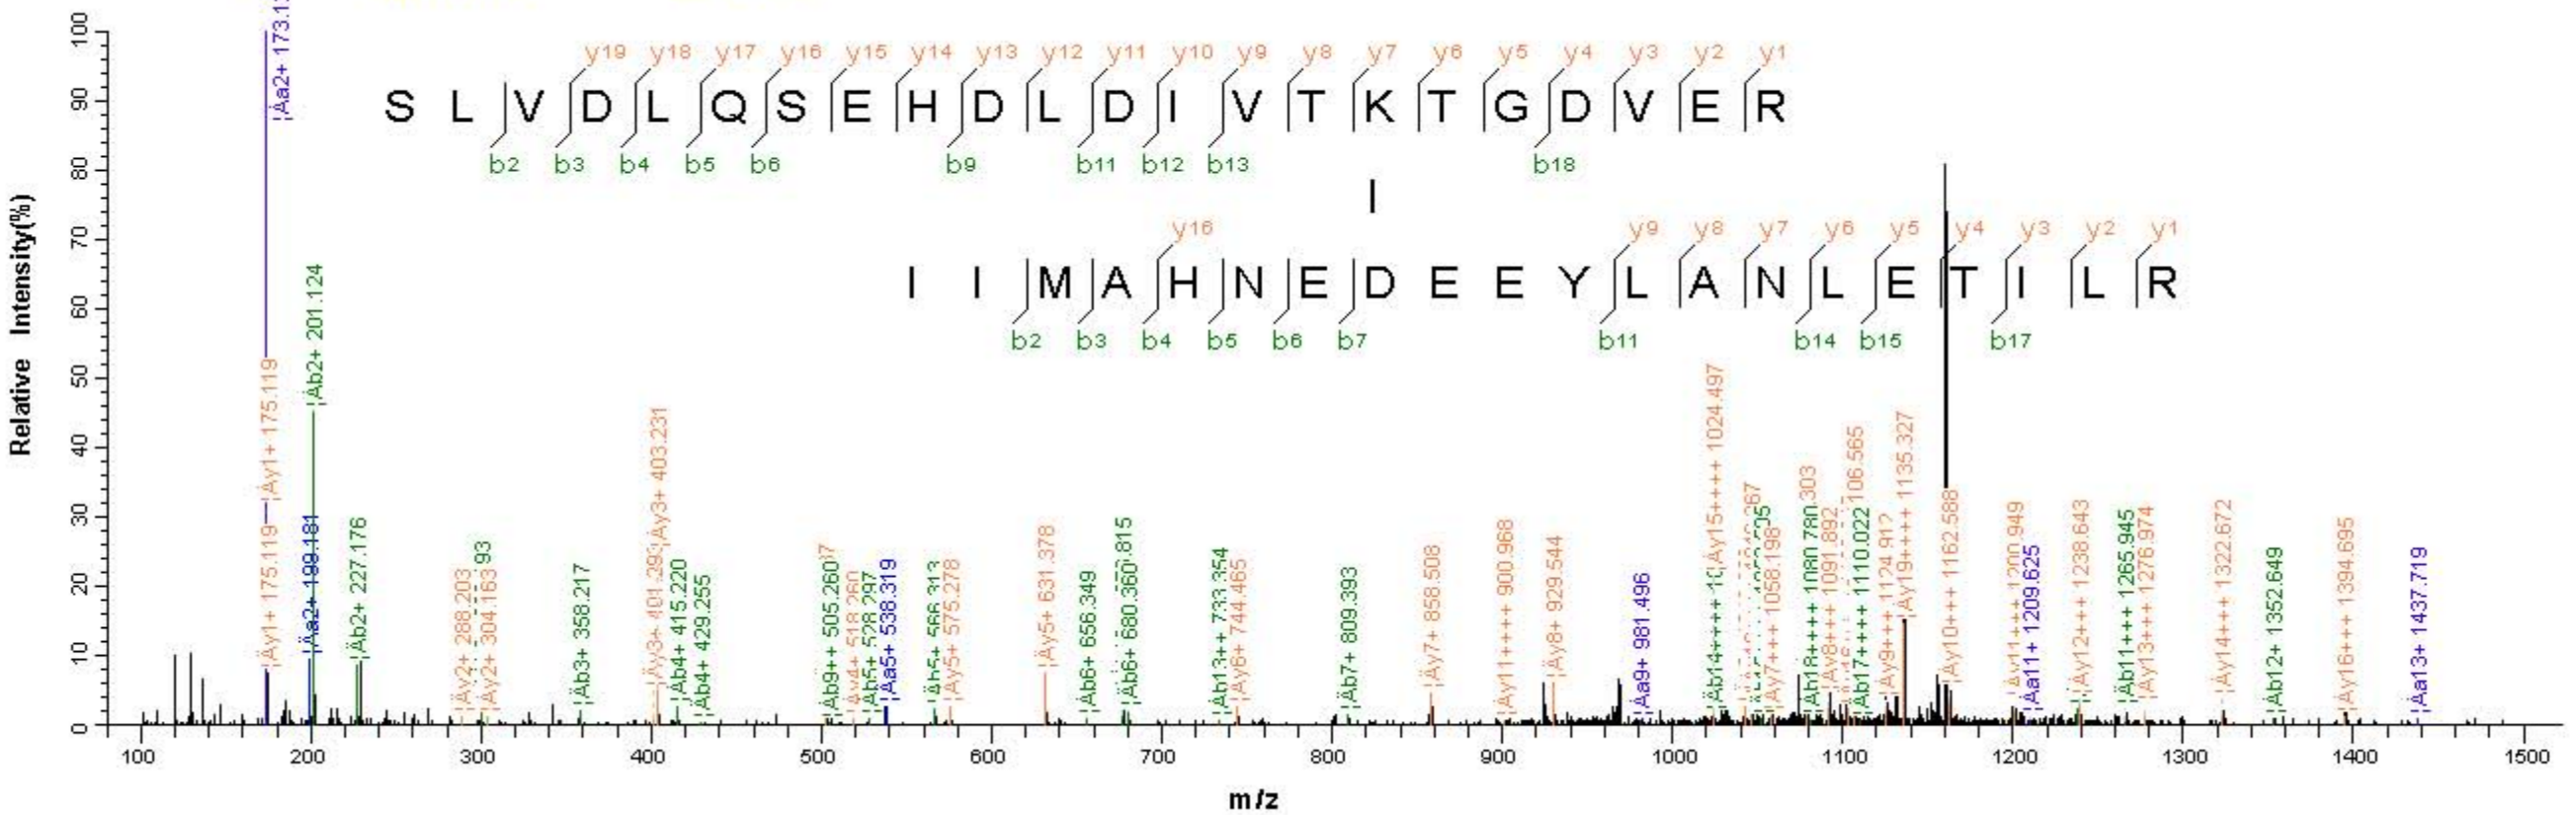

Charge: 5 MH+: 4060.0673 Score: 7.20e-004

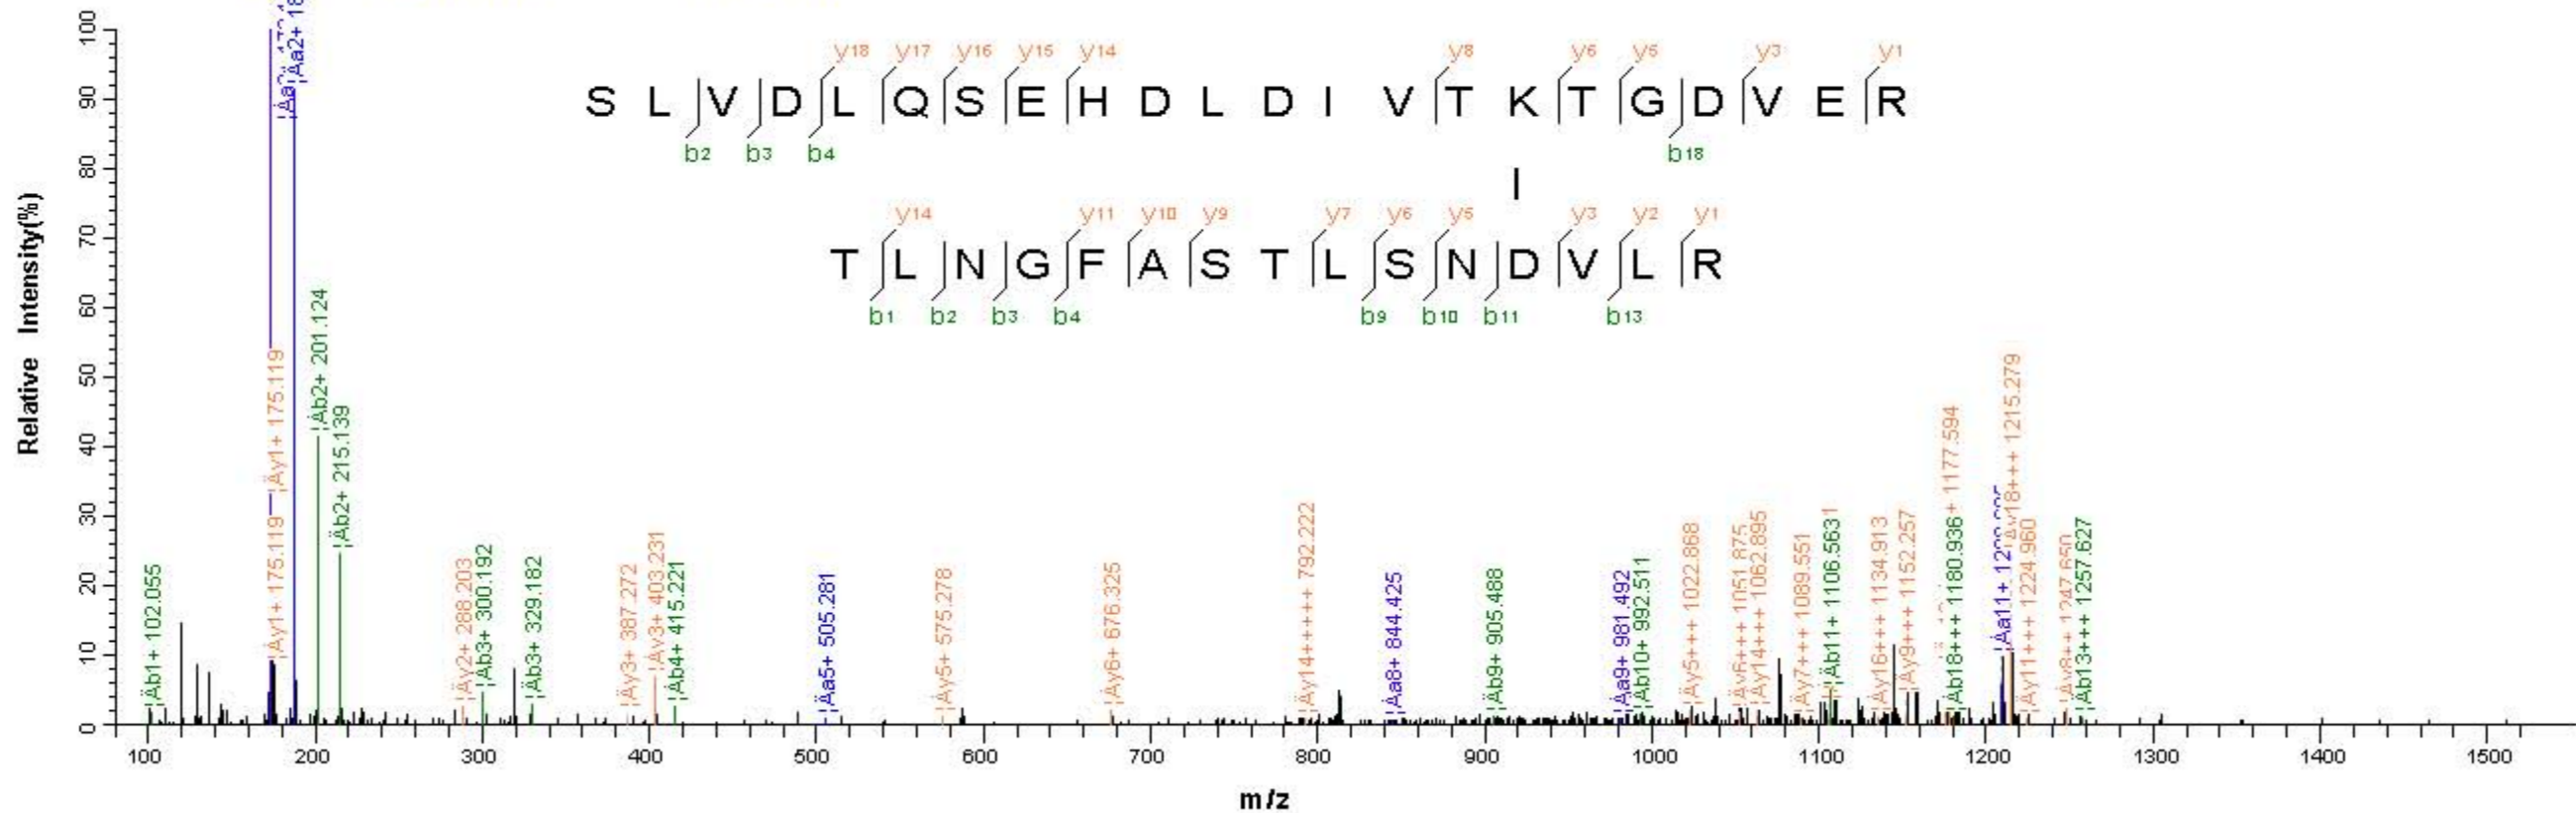

Charge: 4 MH+: 2923.6588 Score: 1.90e-013

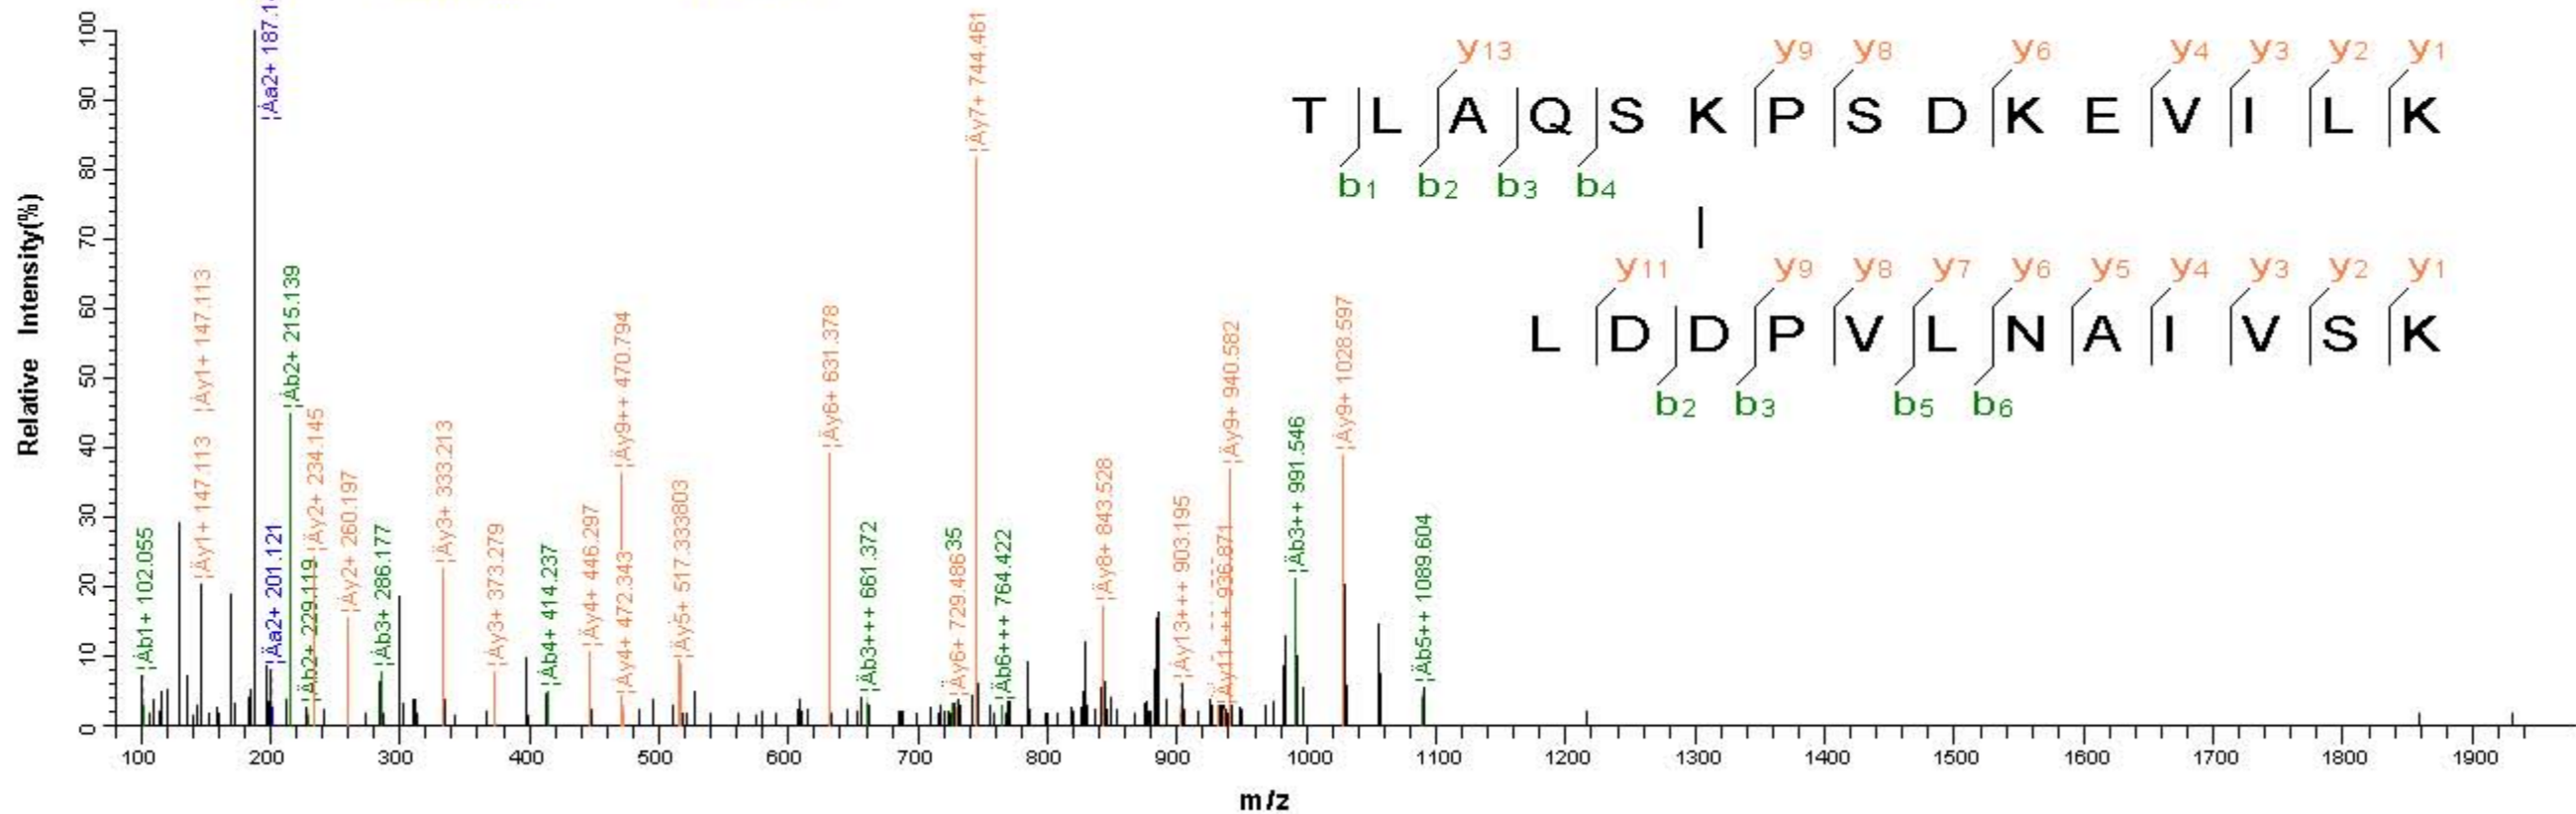

Charge: 5 MH+: 3636.8831 Score: 1.65e-006

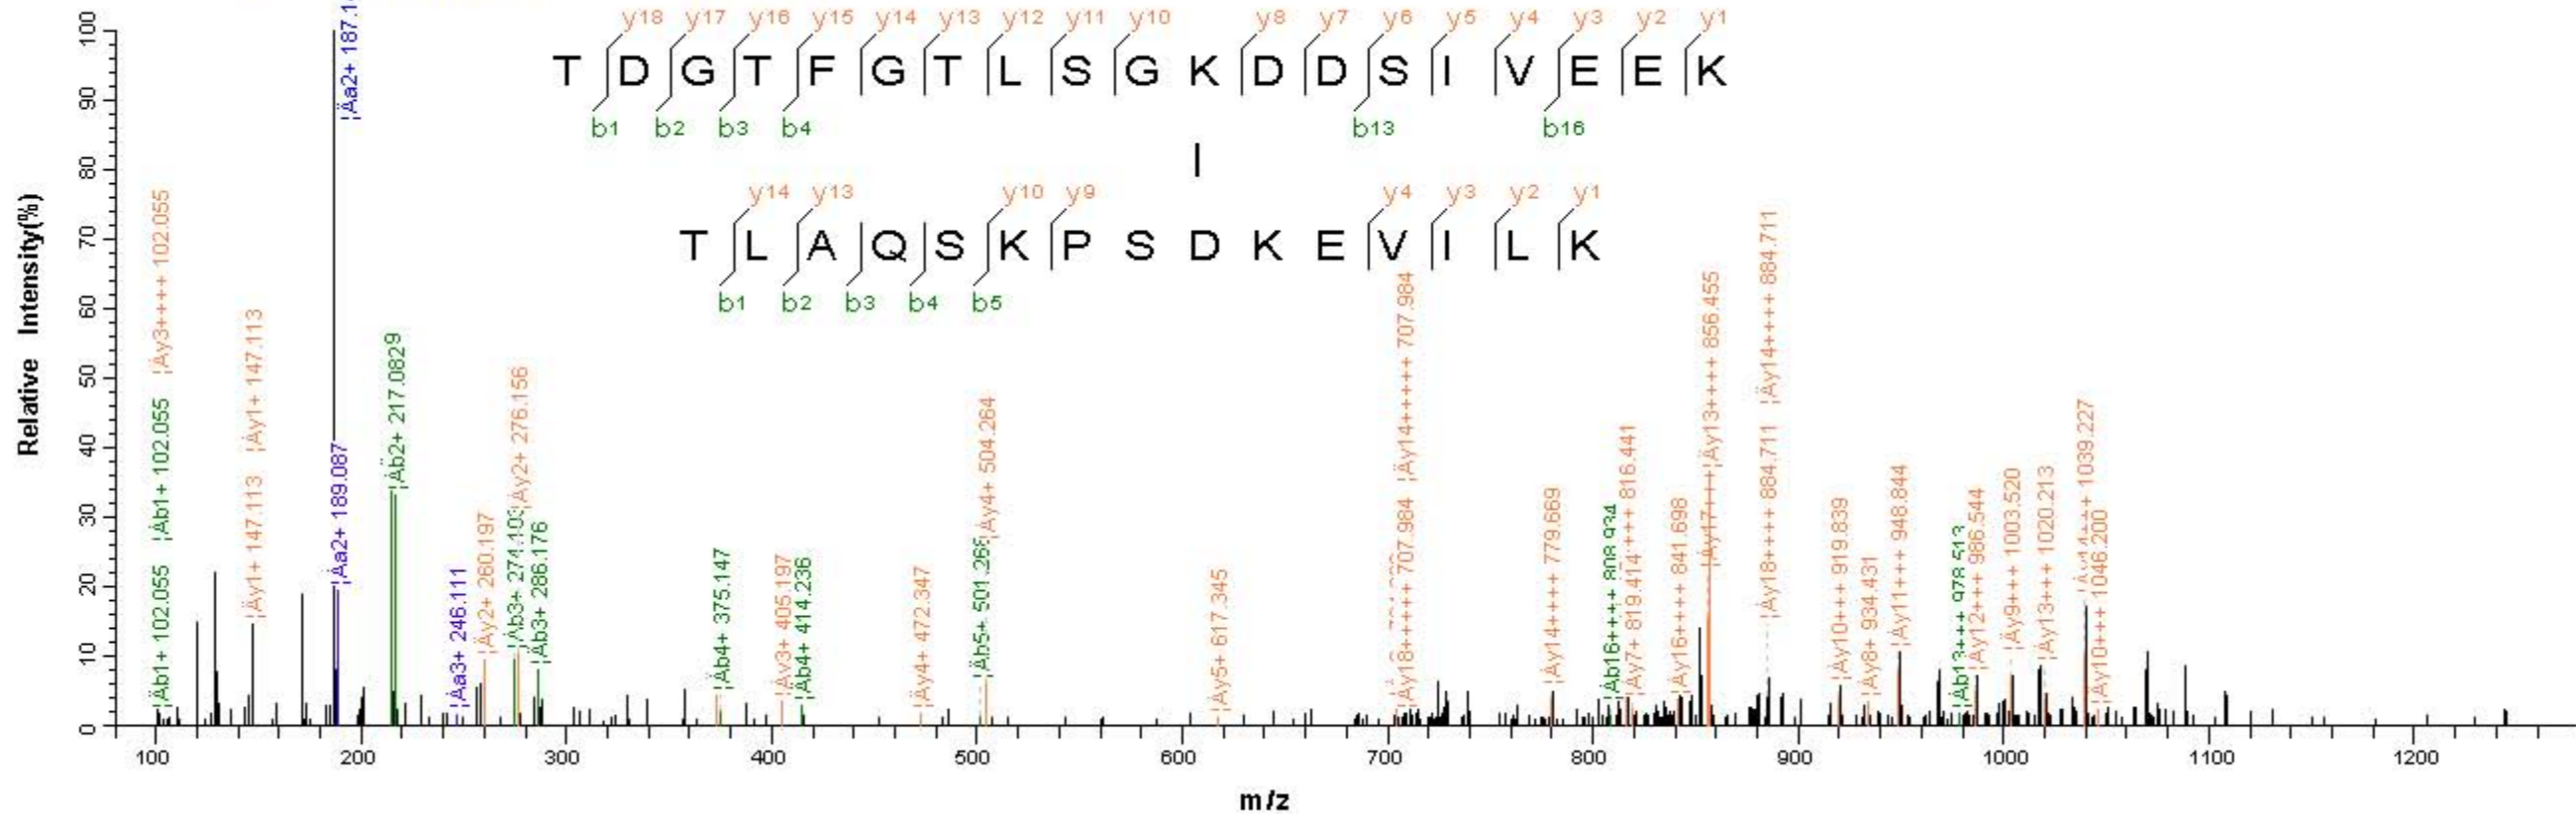

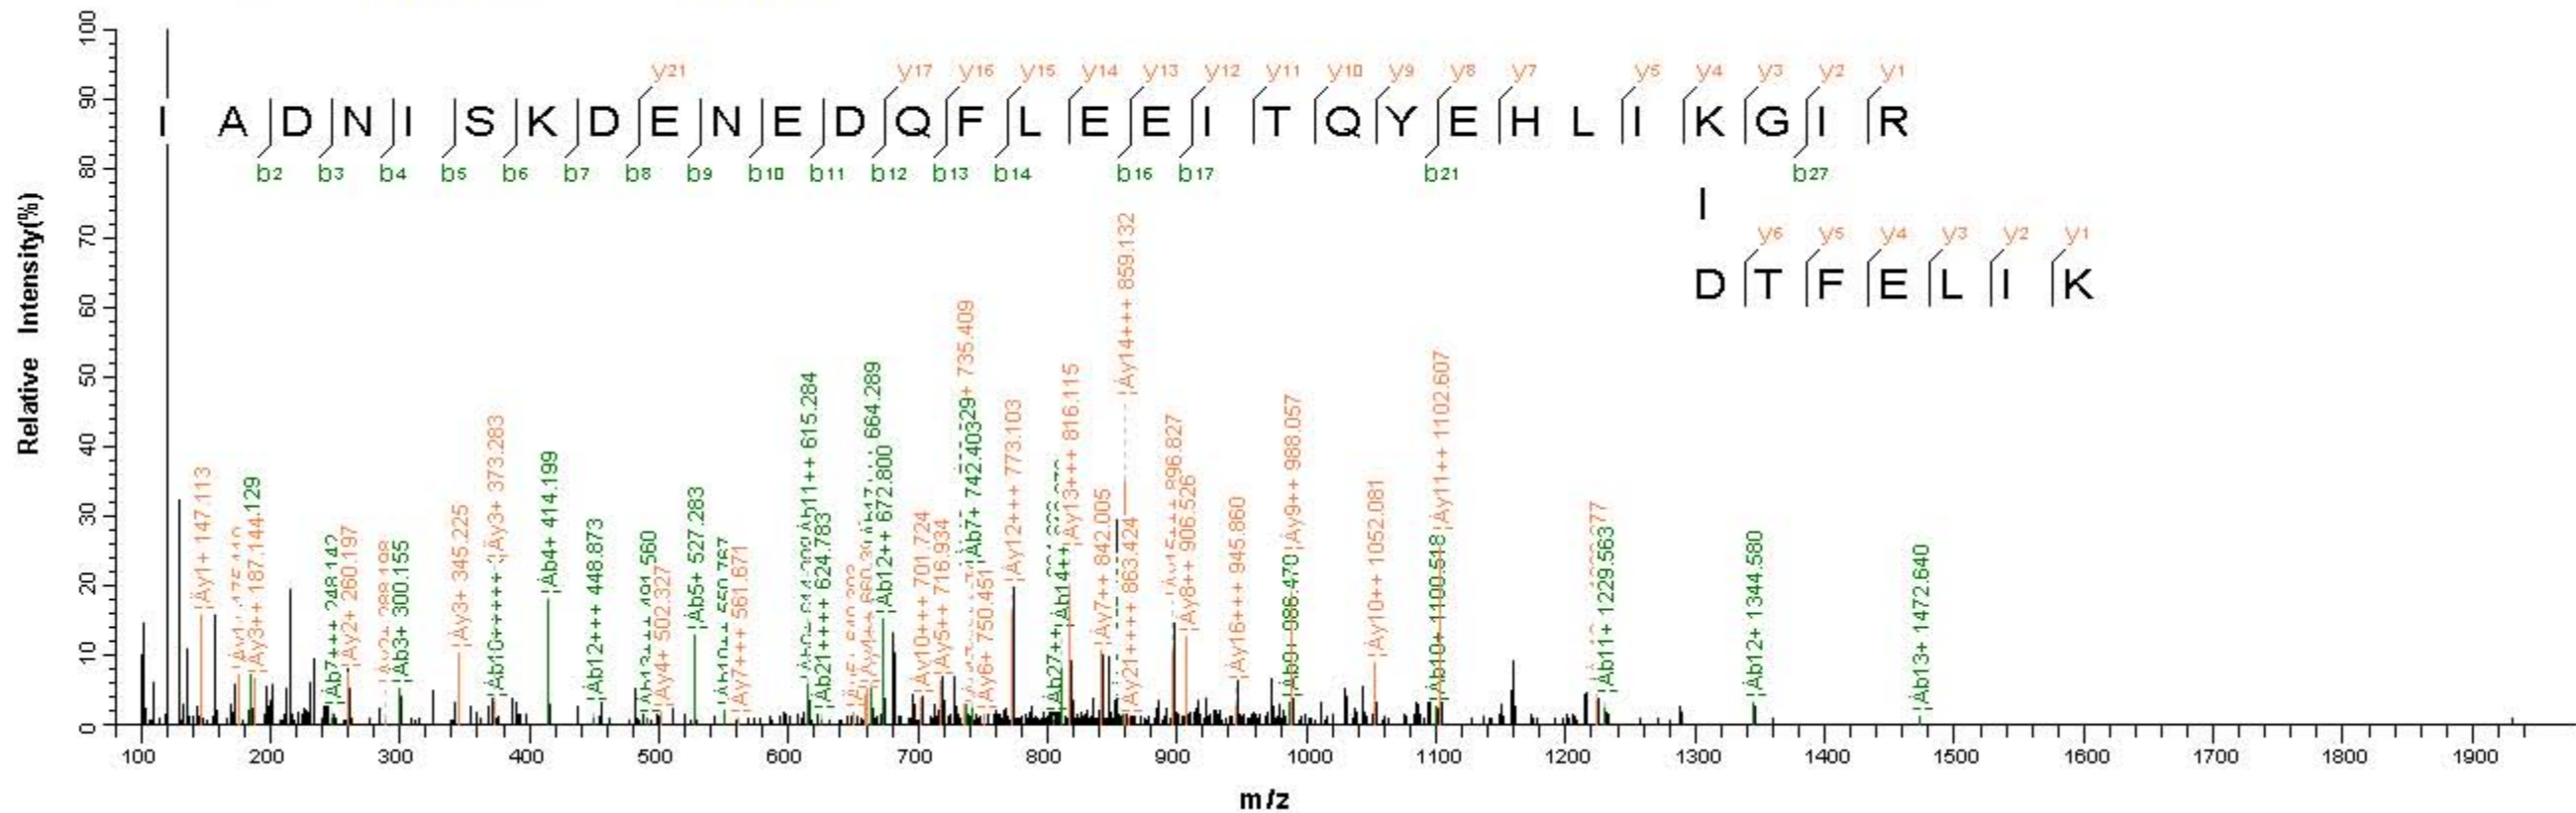

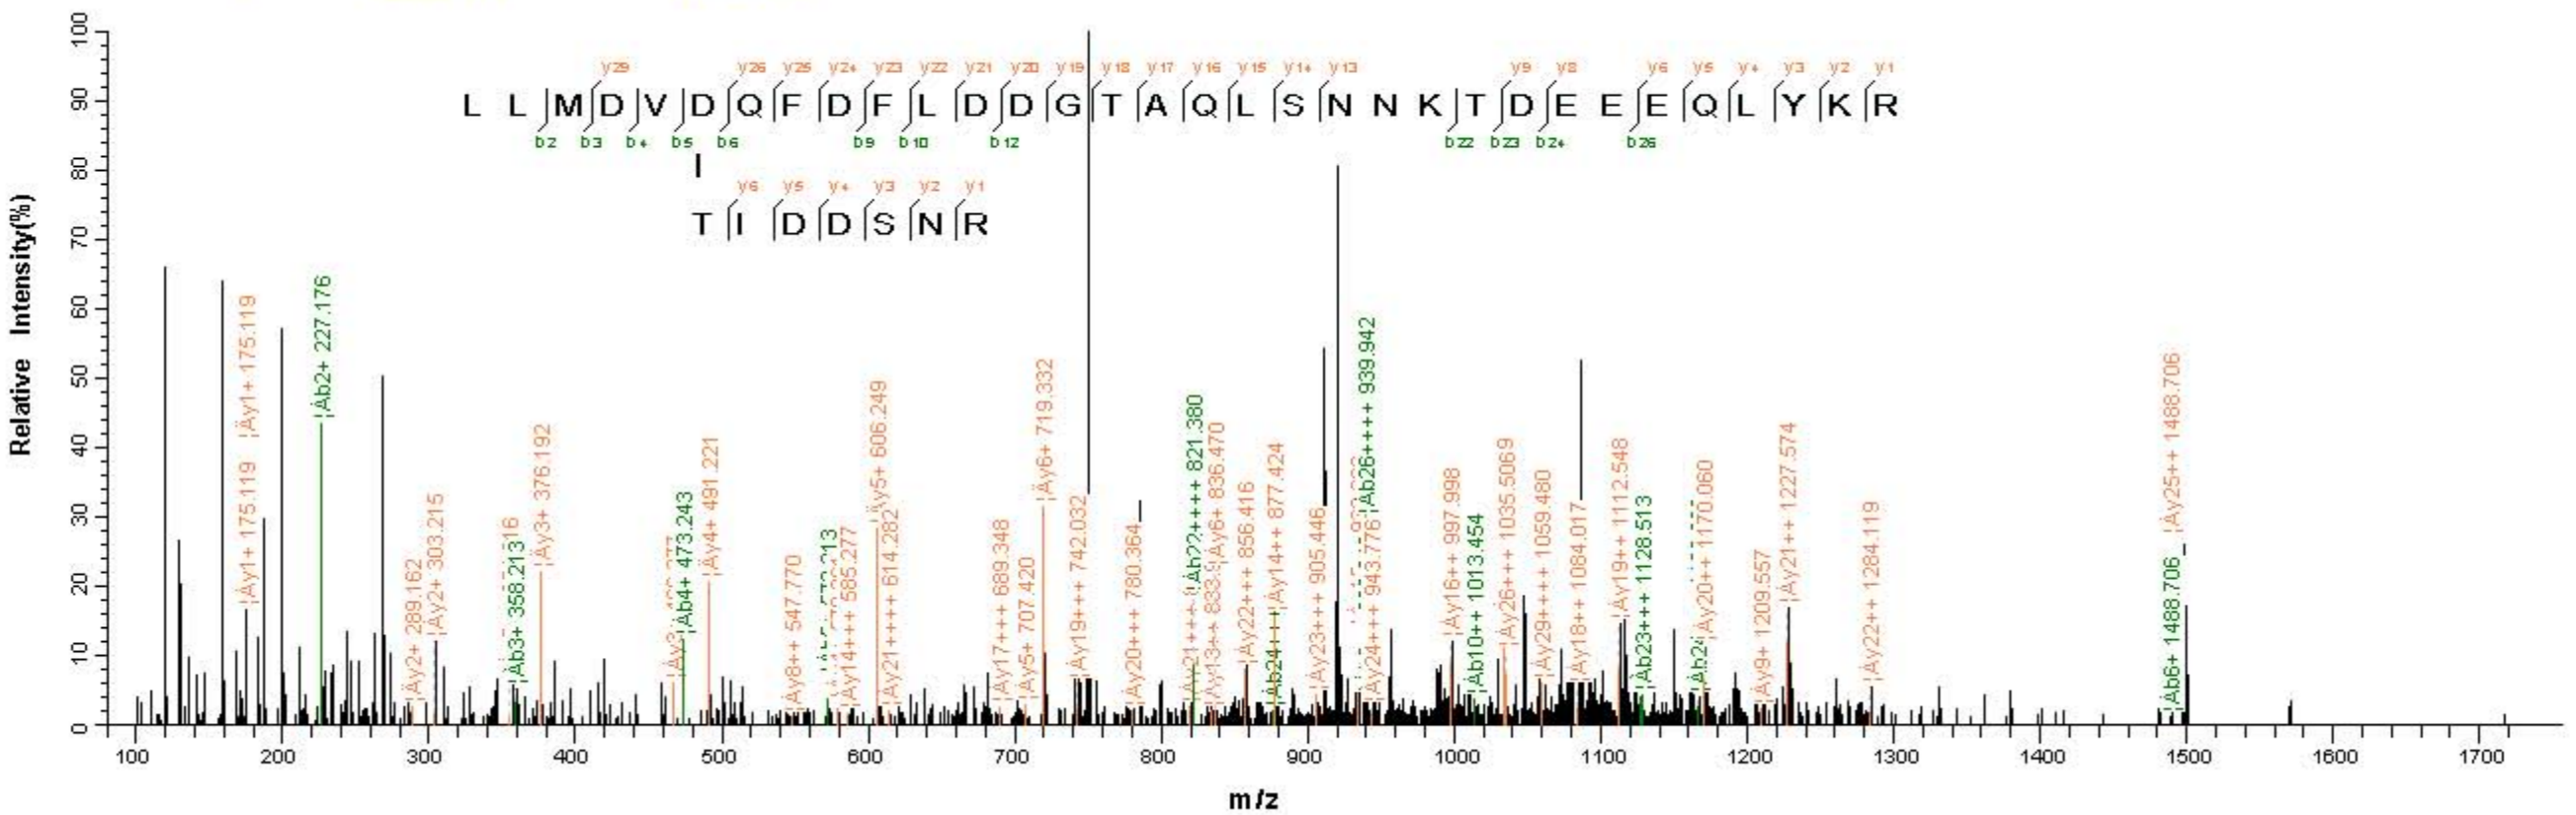



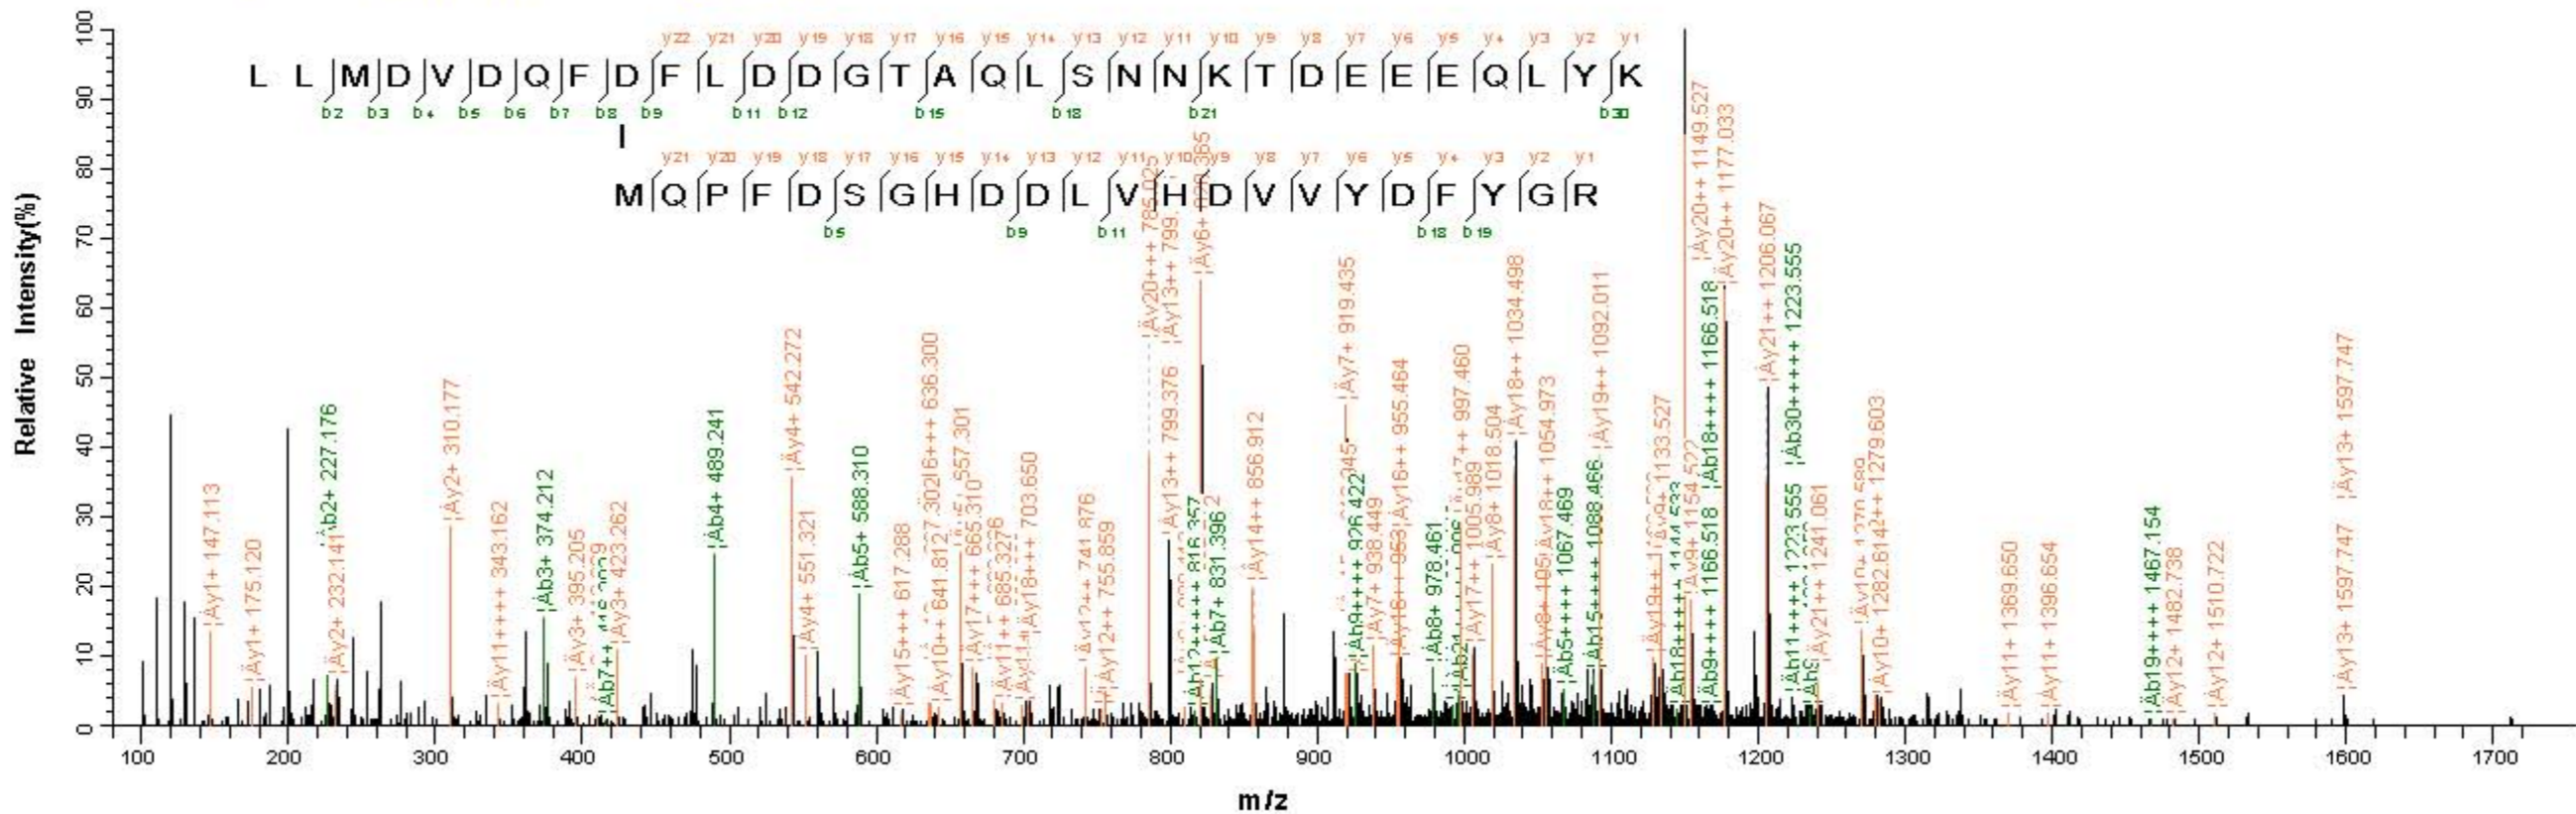

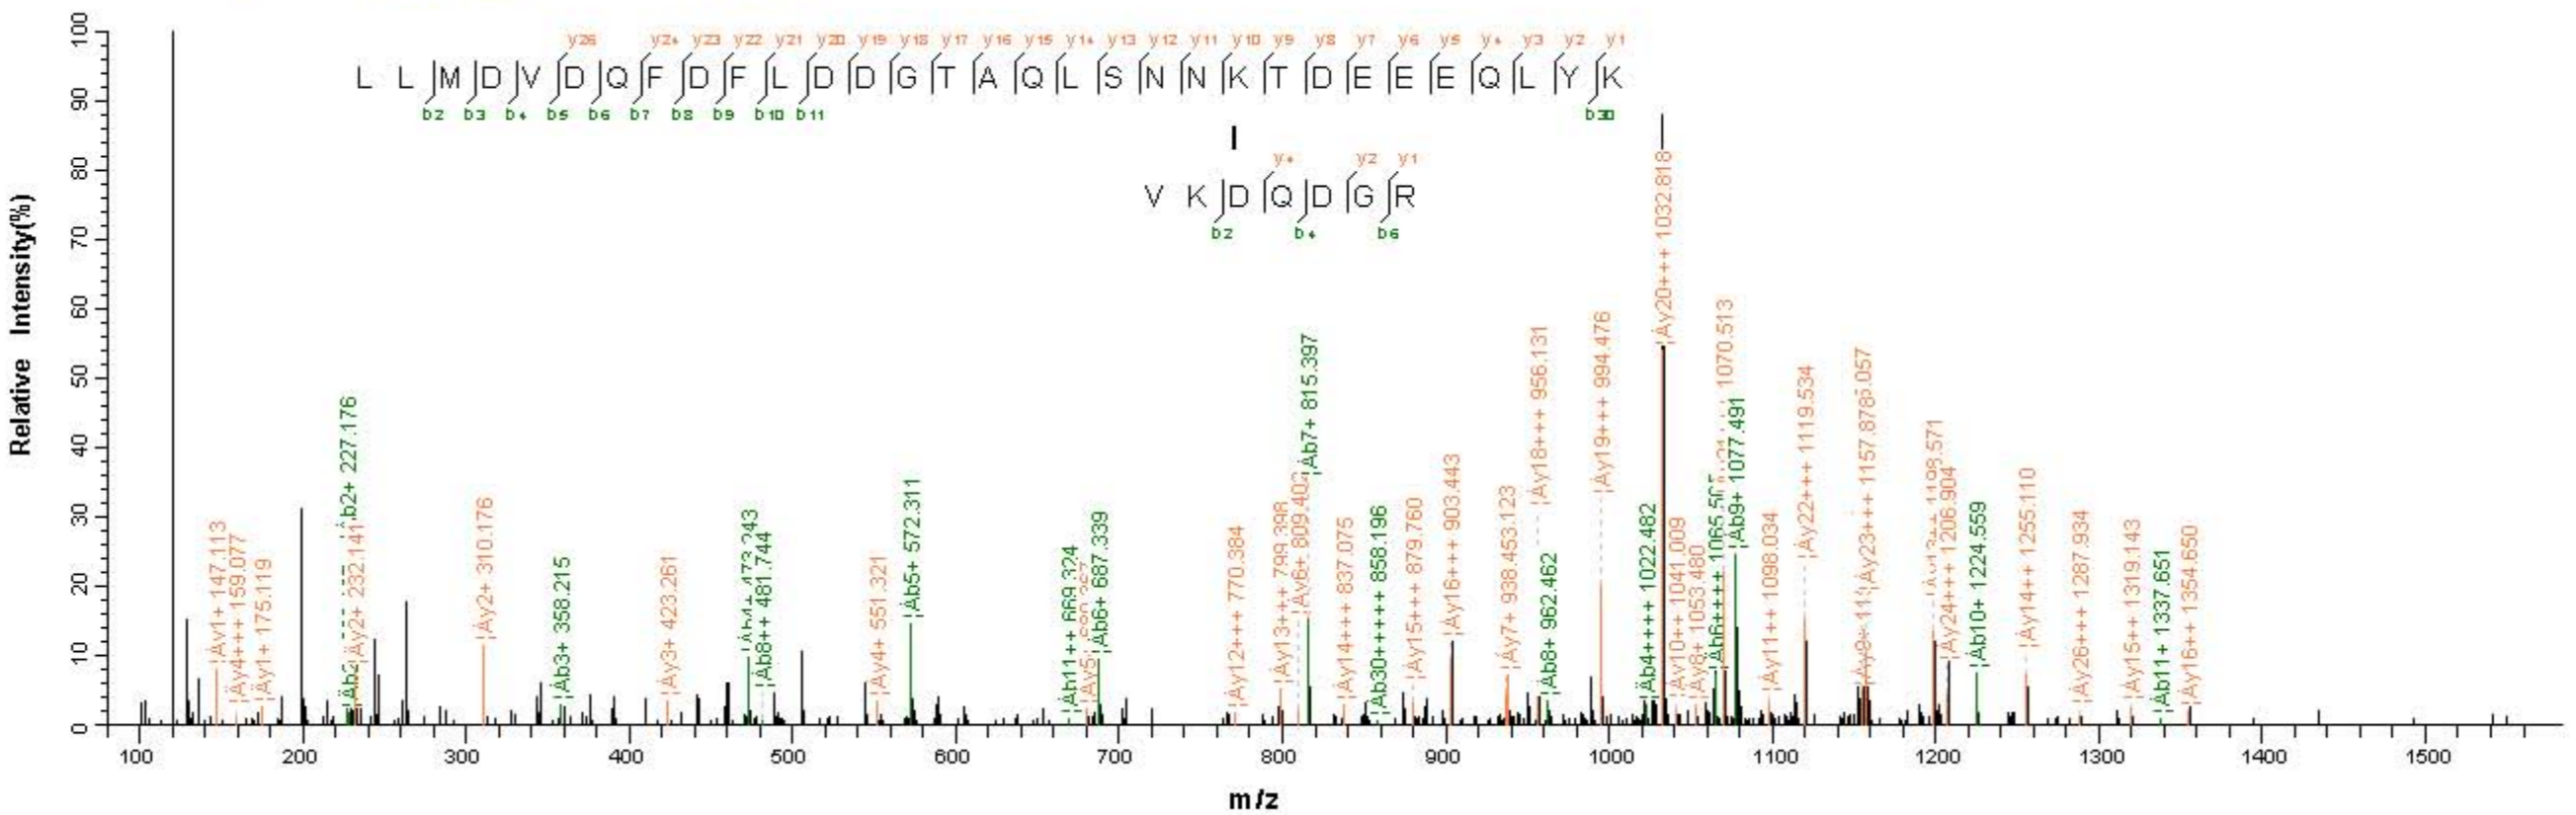

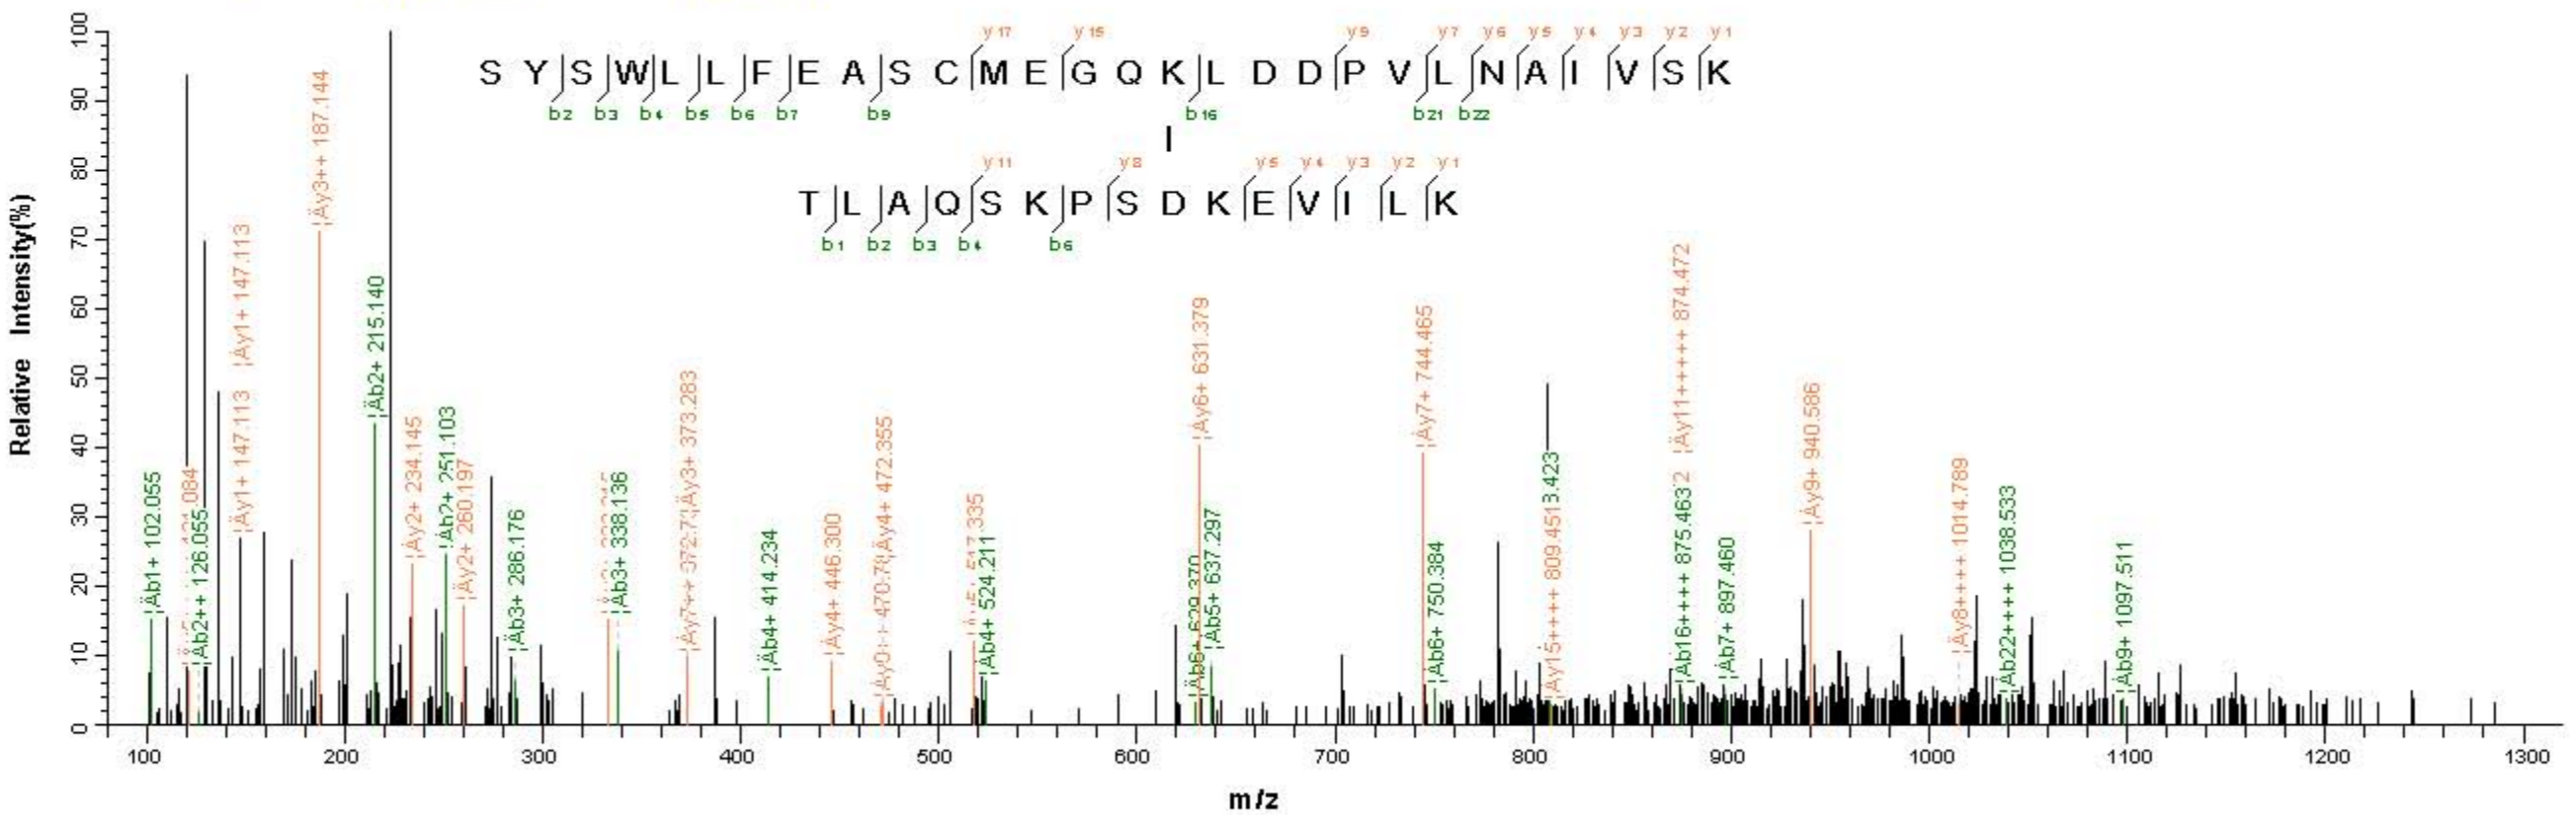

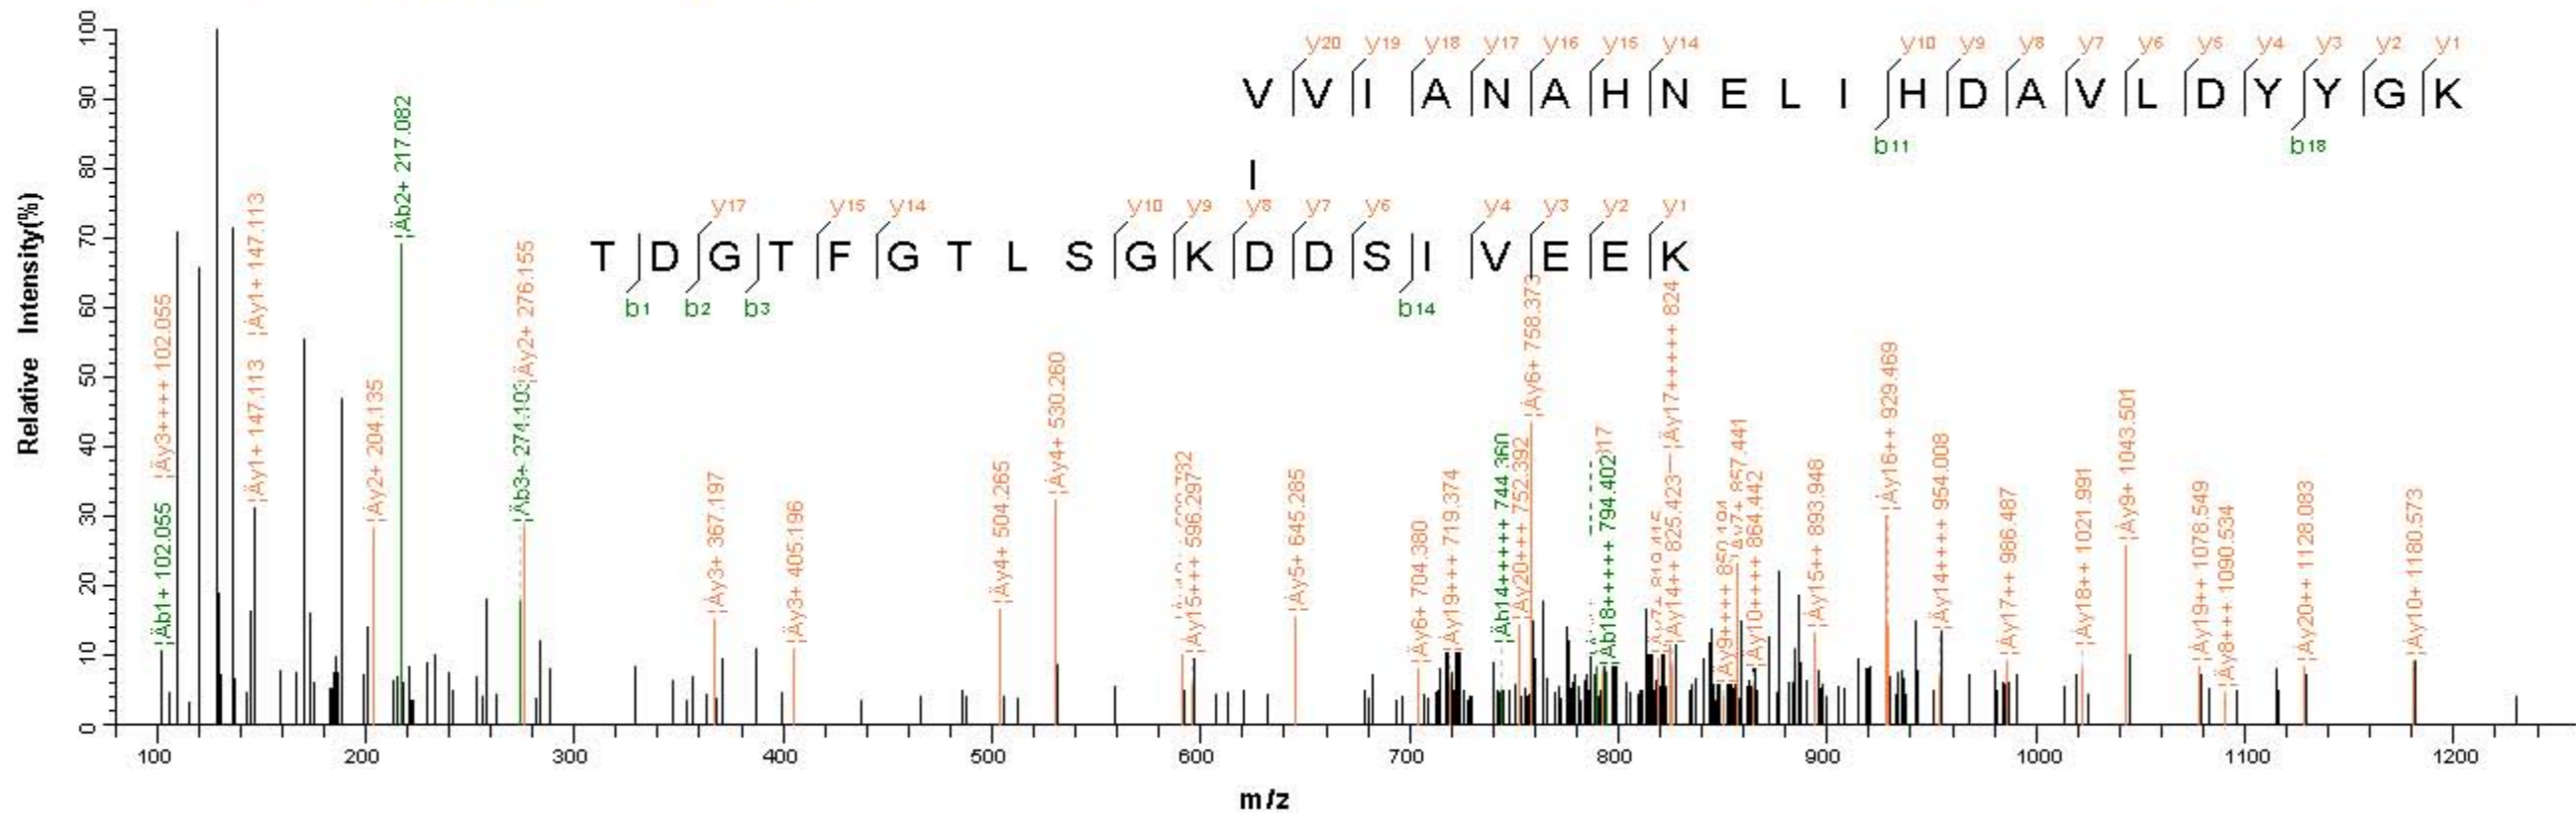

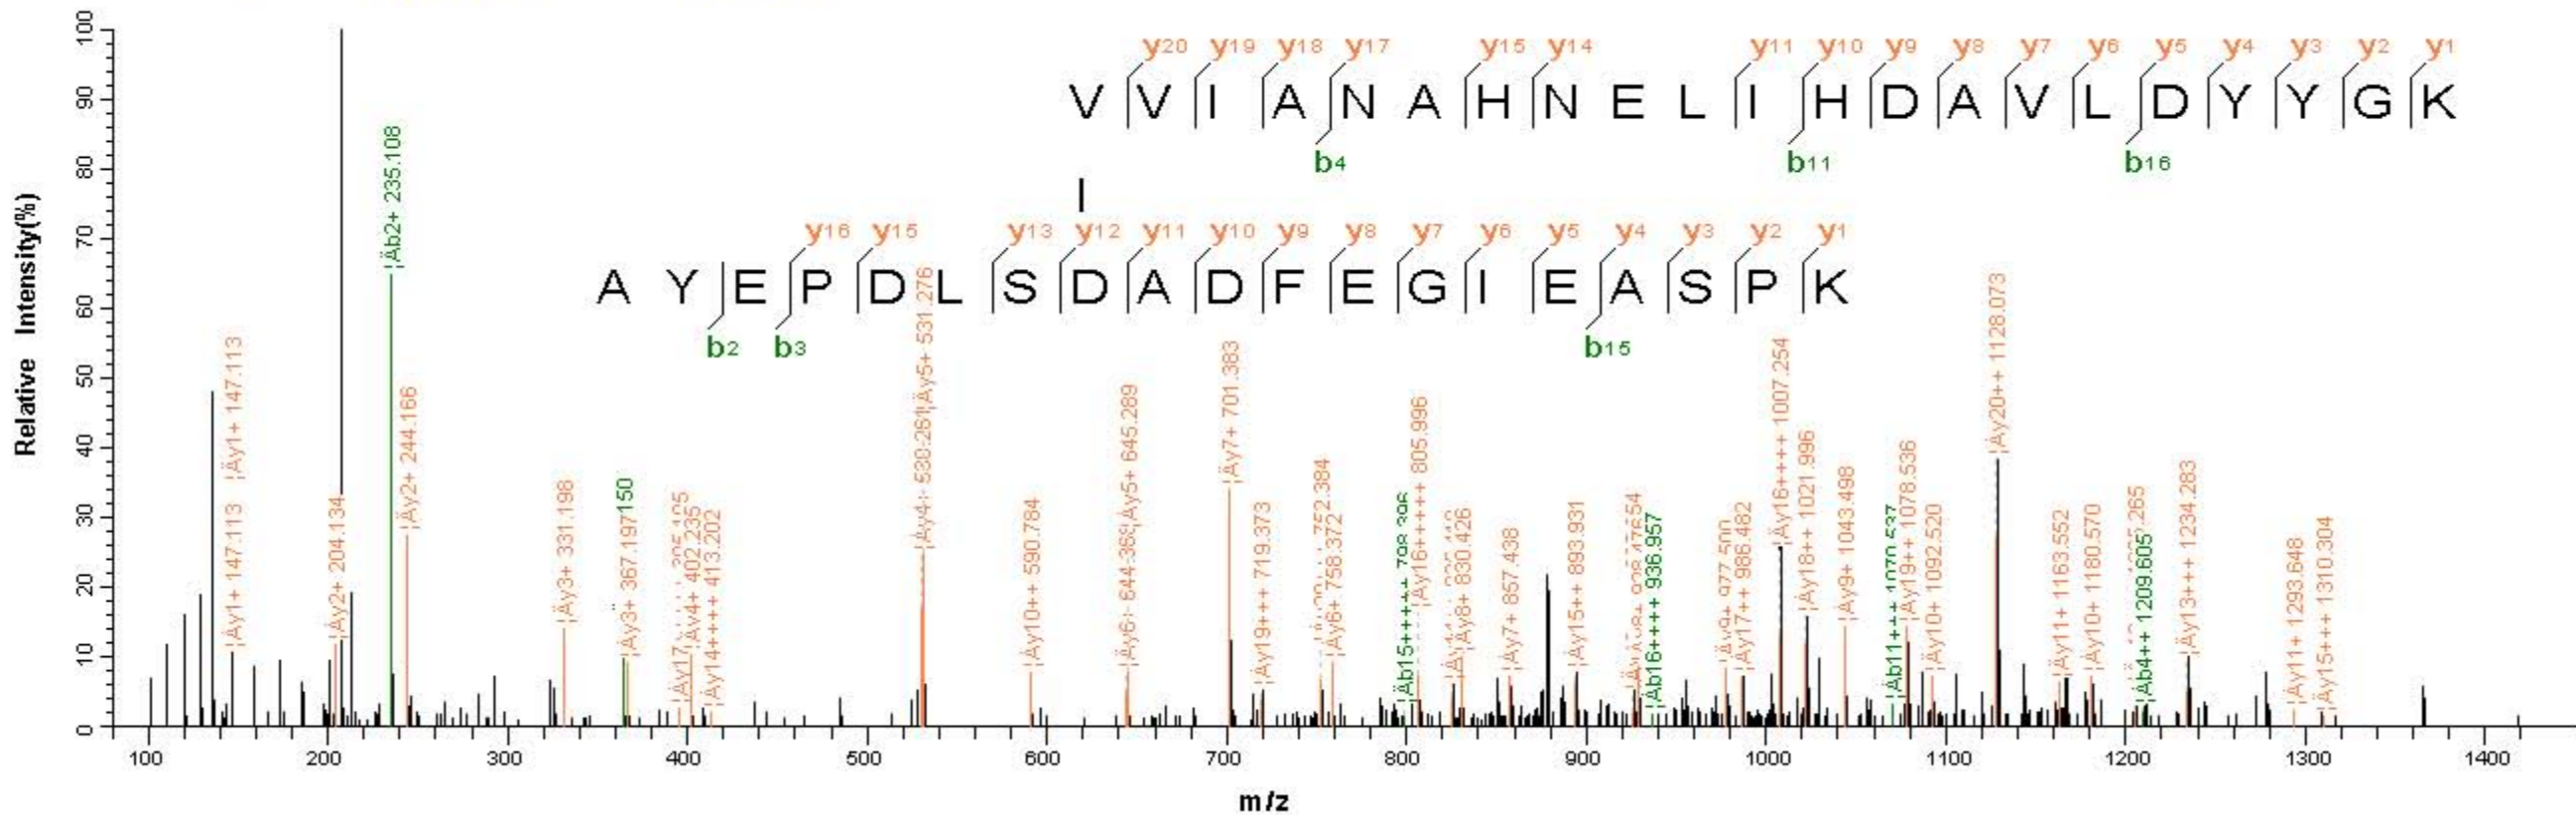

y21 y20 y19 y18 y17 y16 y15 y14 y13 y12 y10 y9 y8 y7 y6 y5 y4 y3 y2 y1  
 M | Q | P | F | D | S | G | H | D | D | L | V | H | D | V | V | Y | D | F | Y | G | R  
 |  
 y7 y6 y5 y4 y3 y2 y1  
 T | D | E | E | E | Q | L | Y | K  
 b1 b4 b14 b19

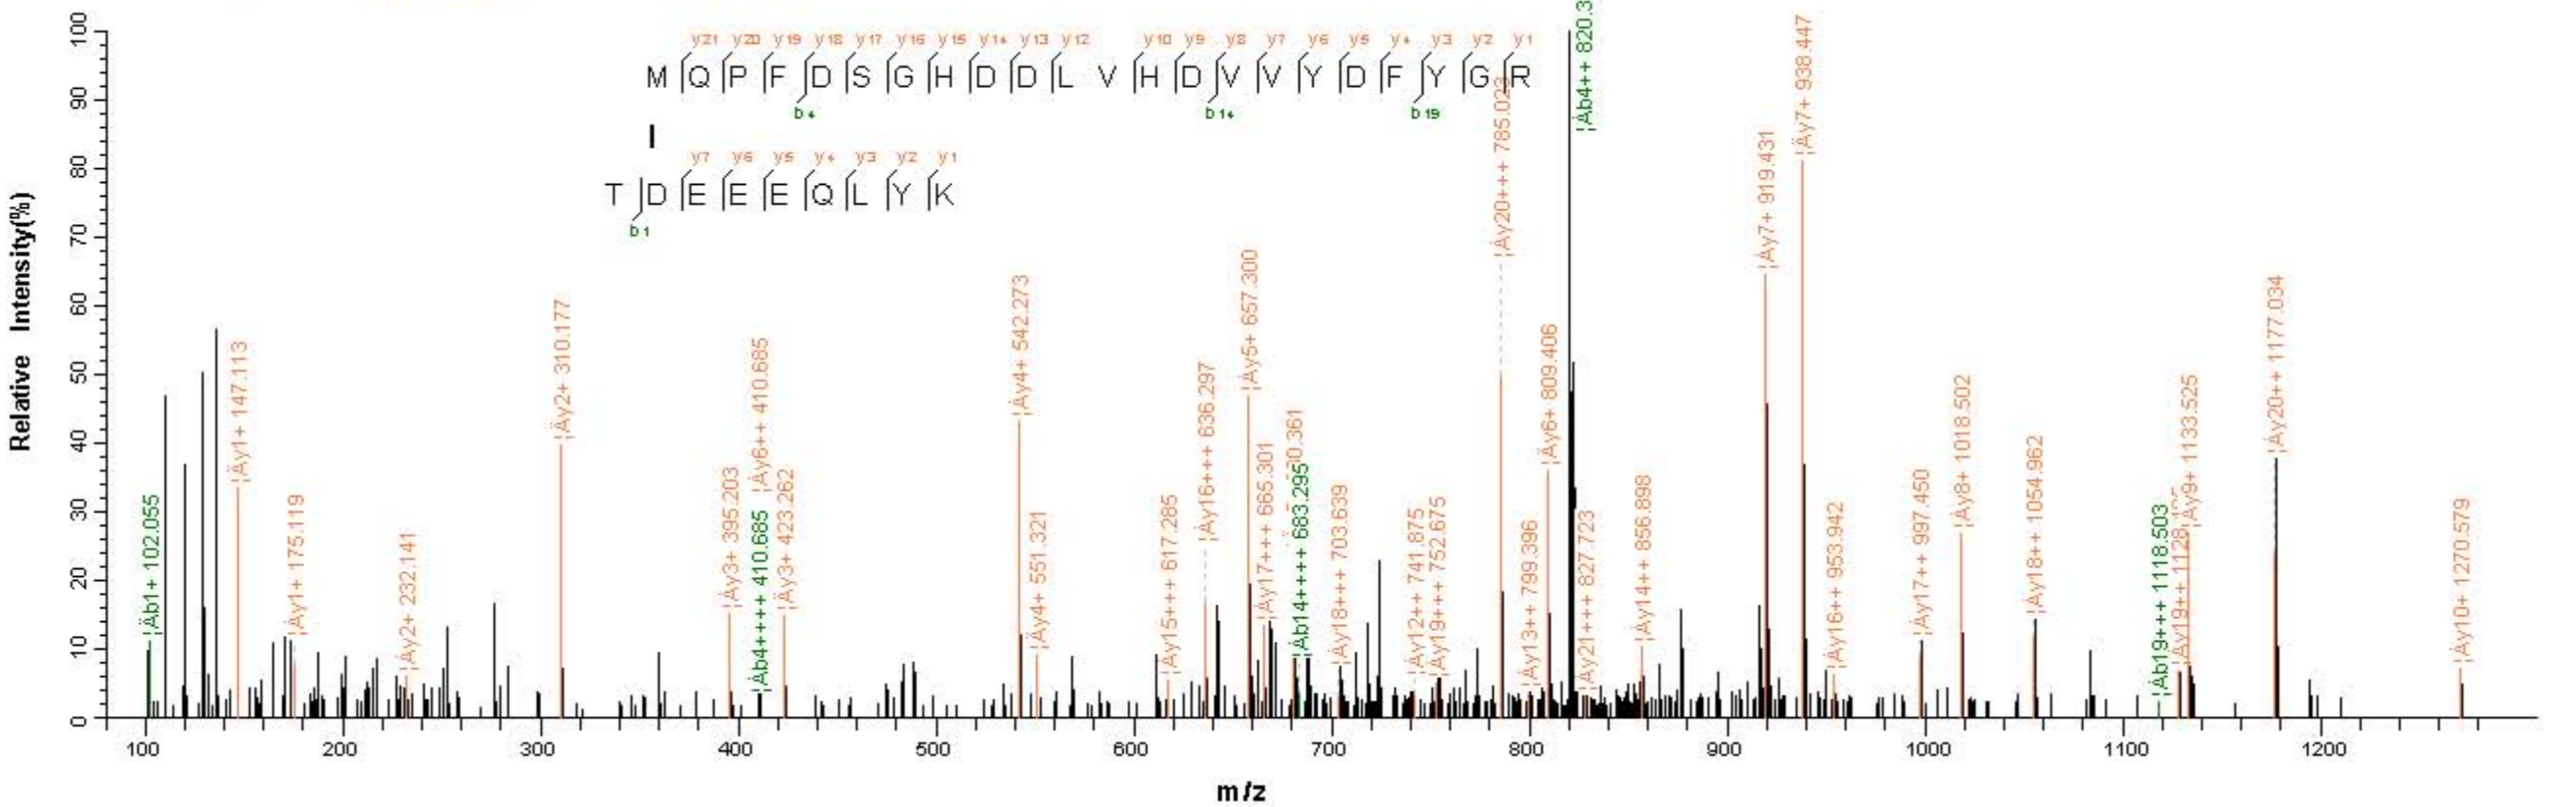

Q P F D S G H D D L V H D V V Y D F Y G R  
 |  
 M T I D D S N R

Fragmentation sites: y16, y15, y14, y13, y12, y11, y10, y9, y8, y7, y6, y5, y4, y3, y2, y1, b8, y6, y5, y4, y3, y1

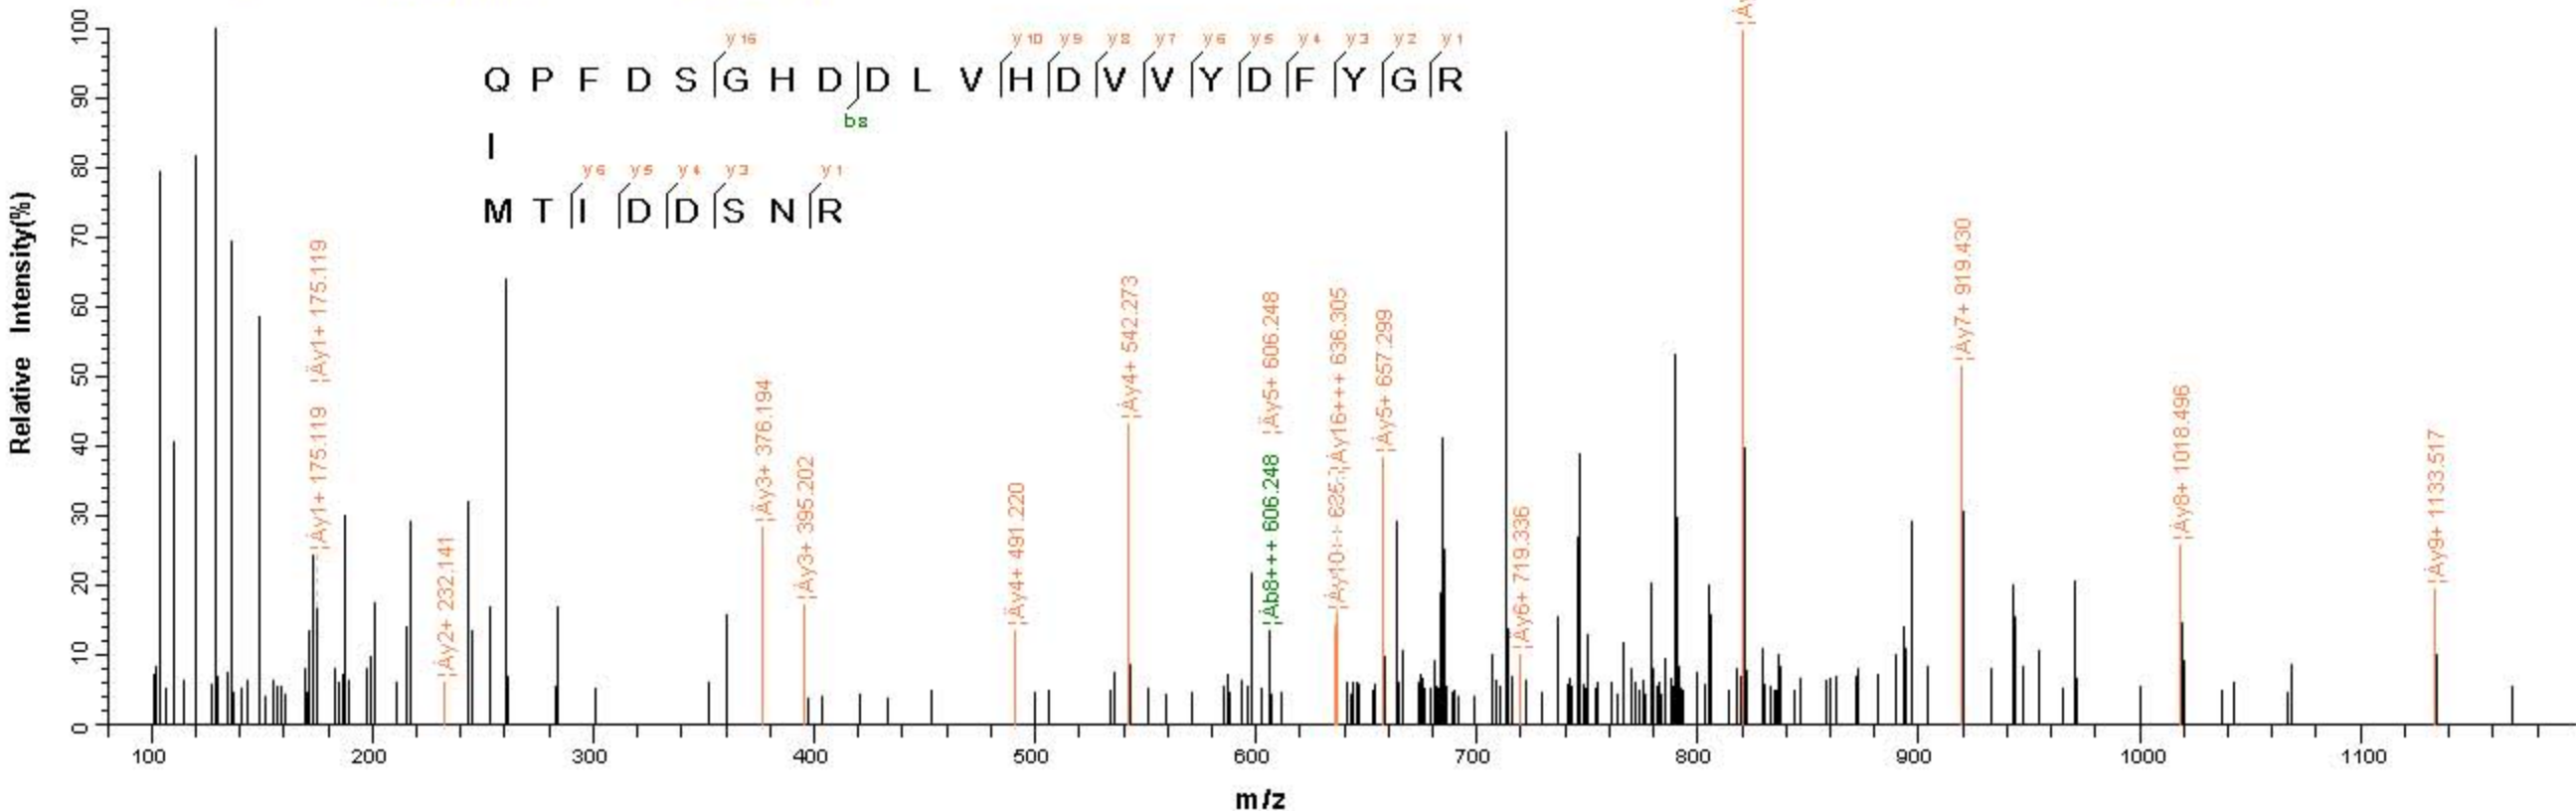

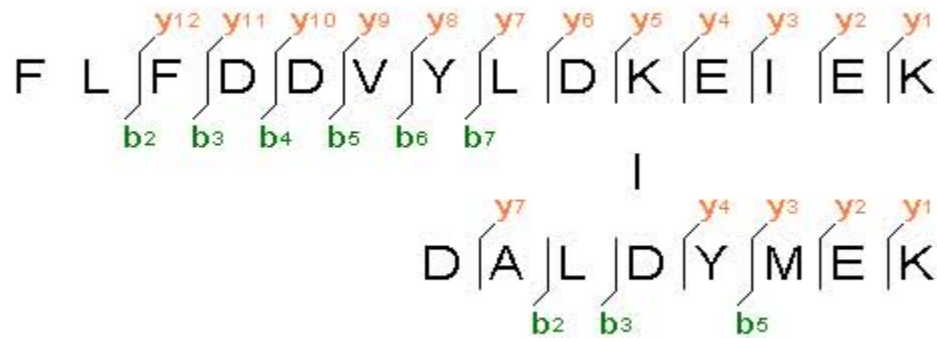

Relative Intensity(%)

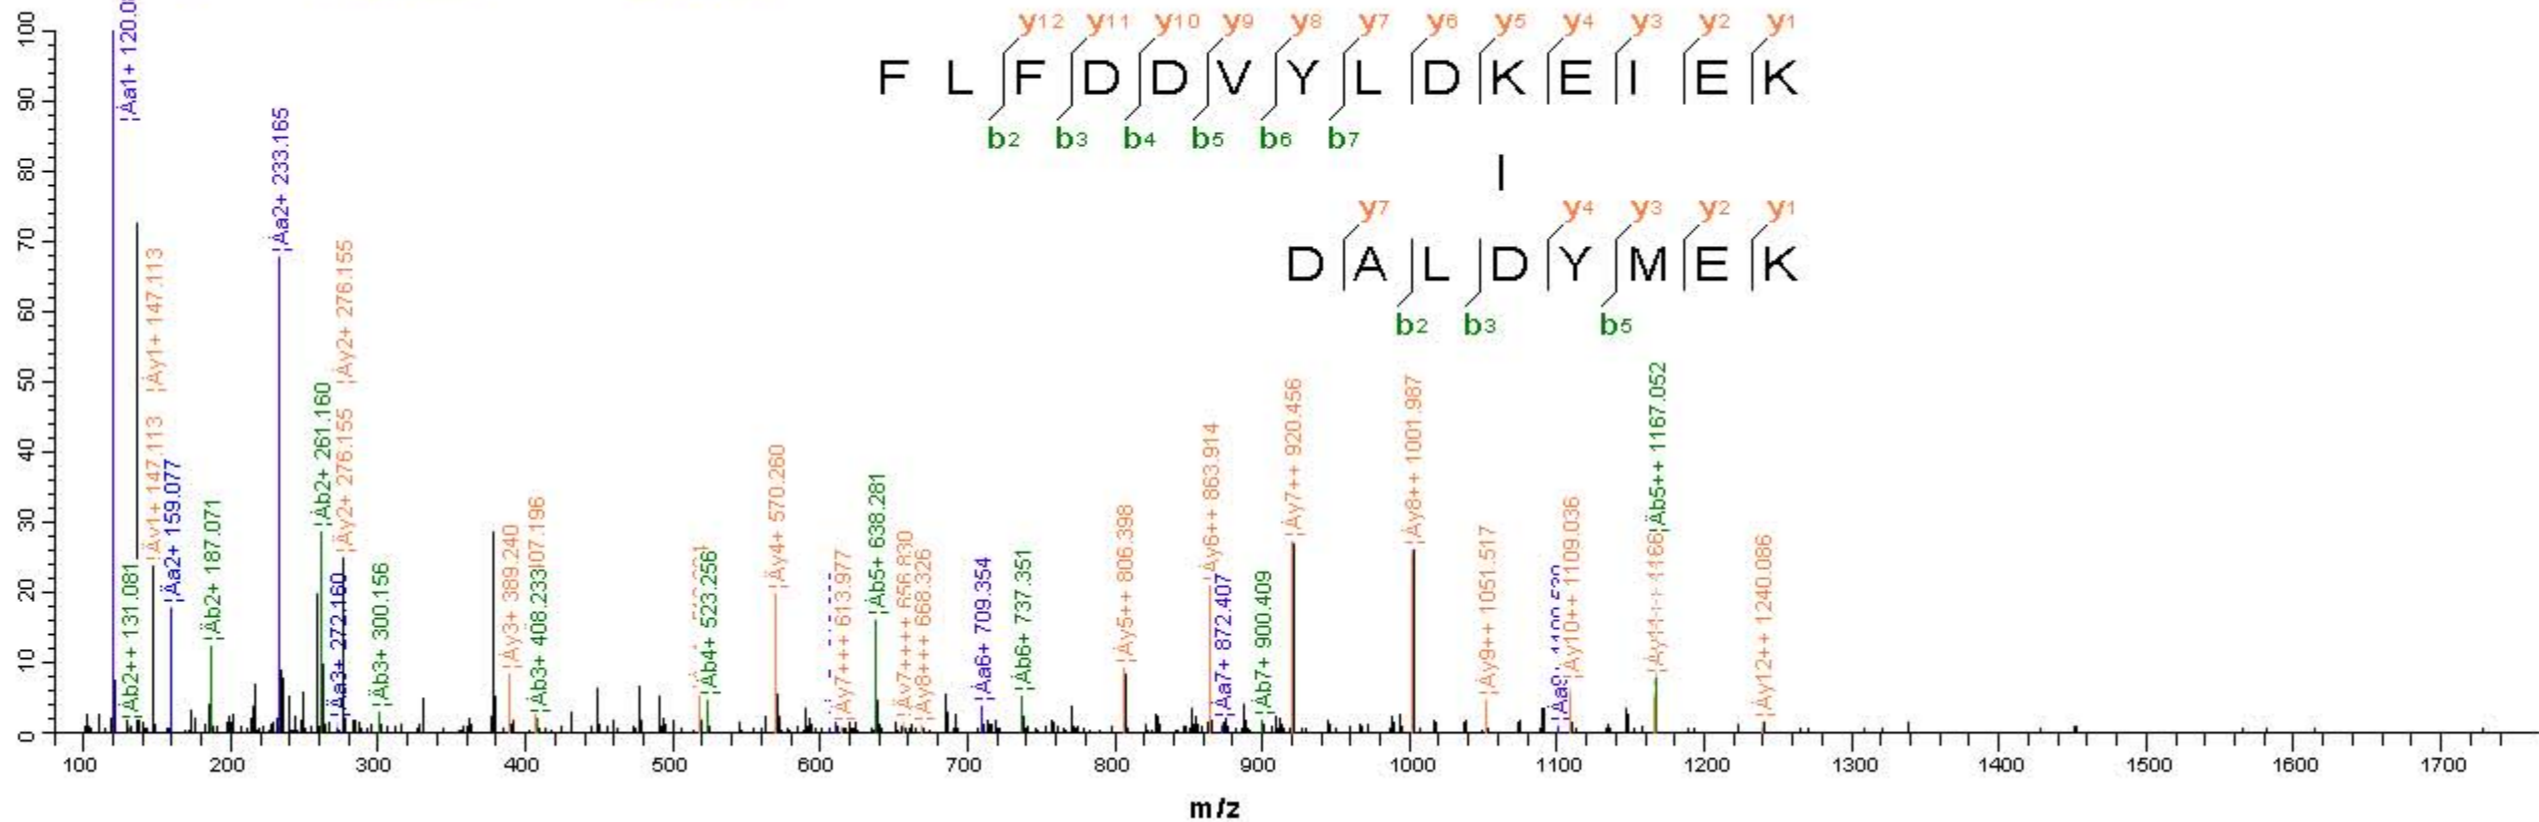



Charge: 4 MH+: 2800.3078 Score: 1.71e-004

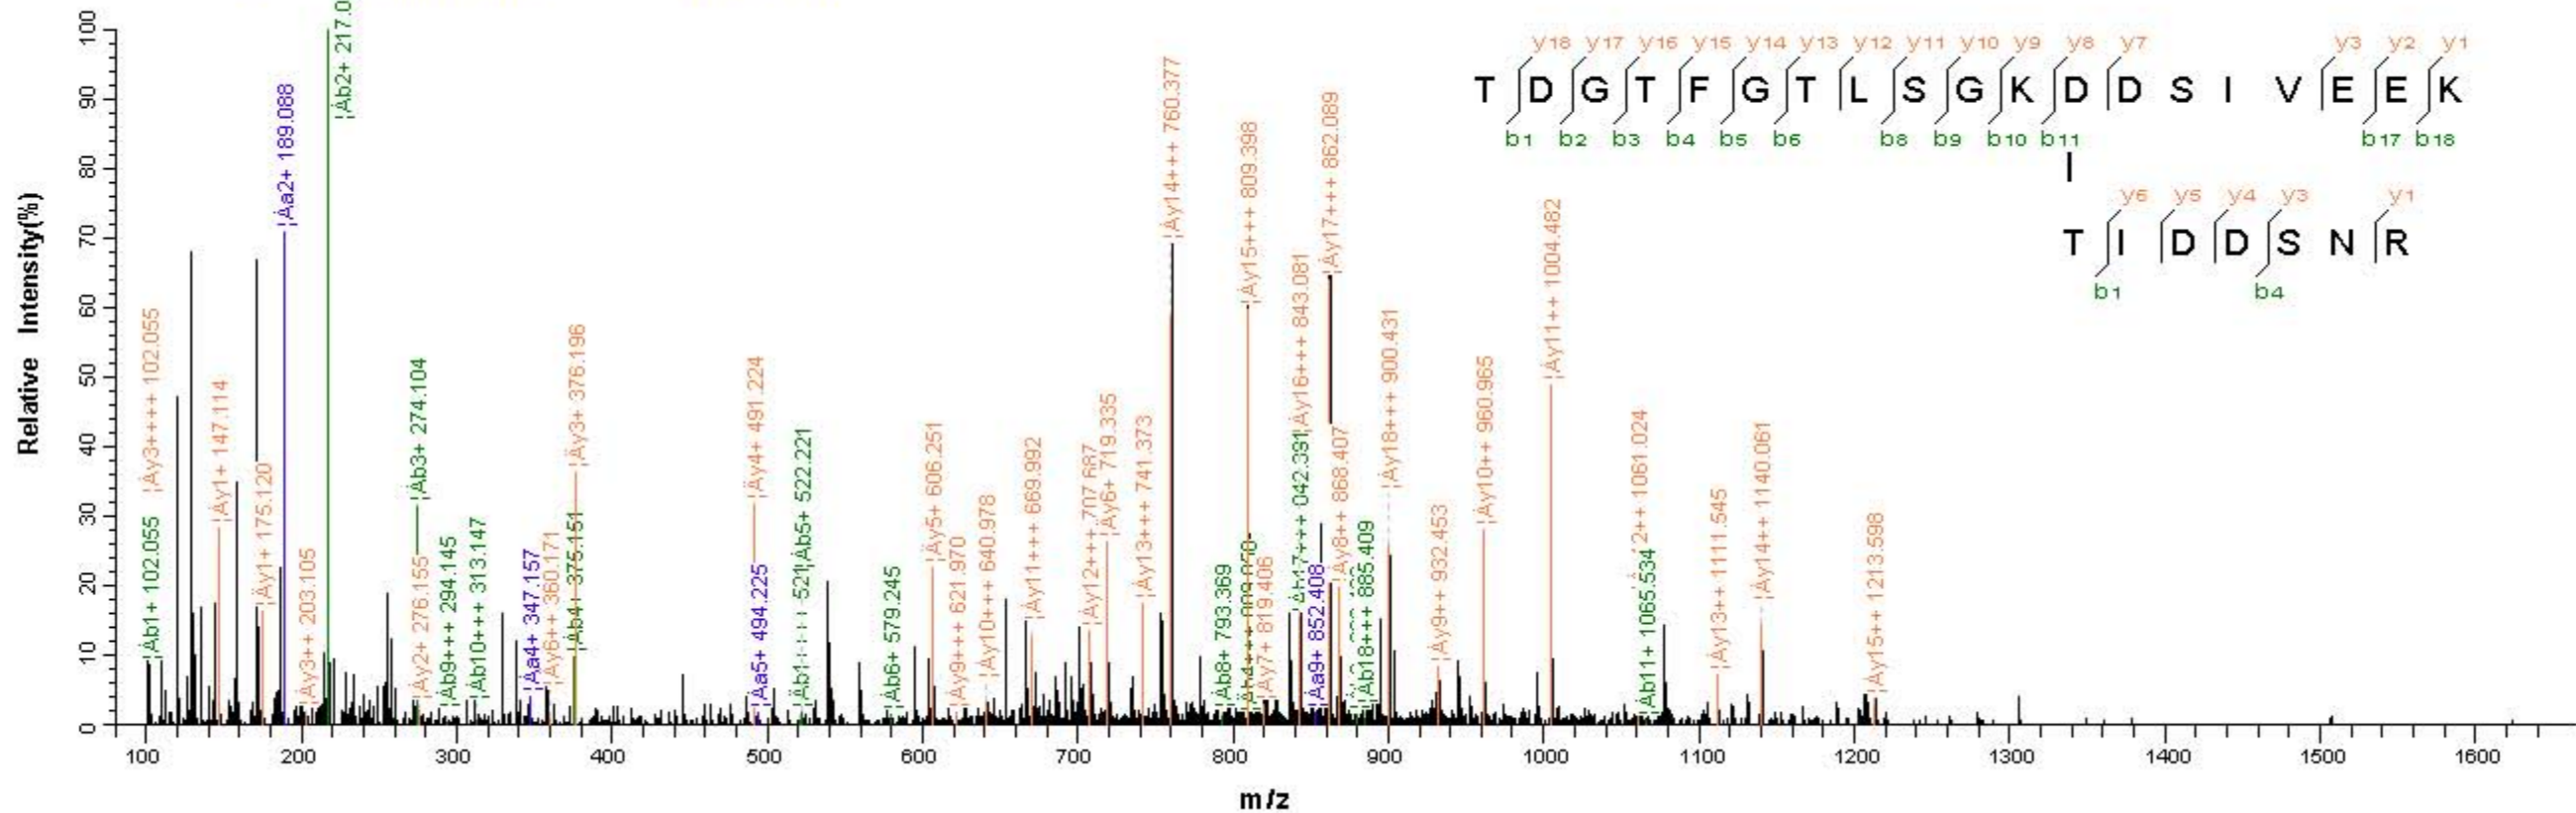

Charge: 4 MH+: 2229.1903 Score: 1.37e-07

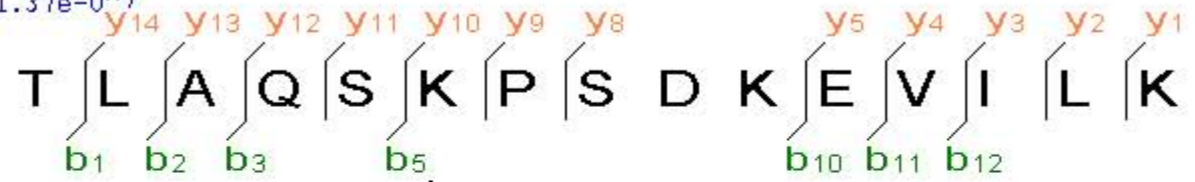

Relative Intensity(%)

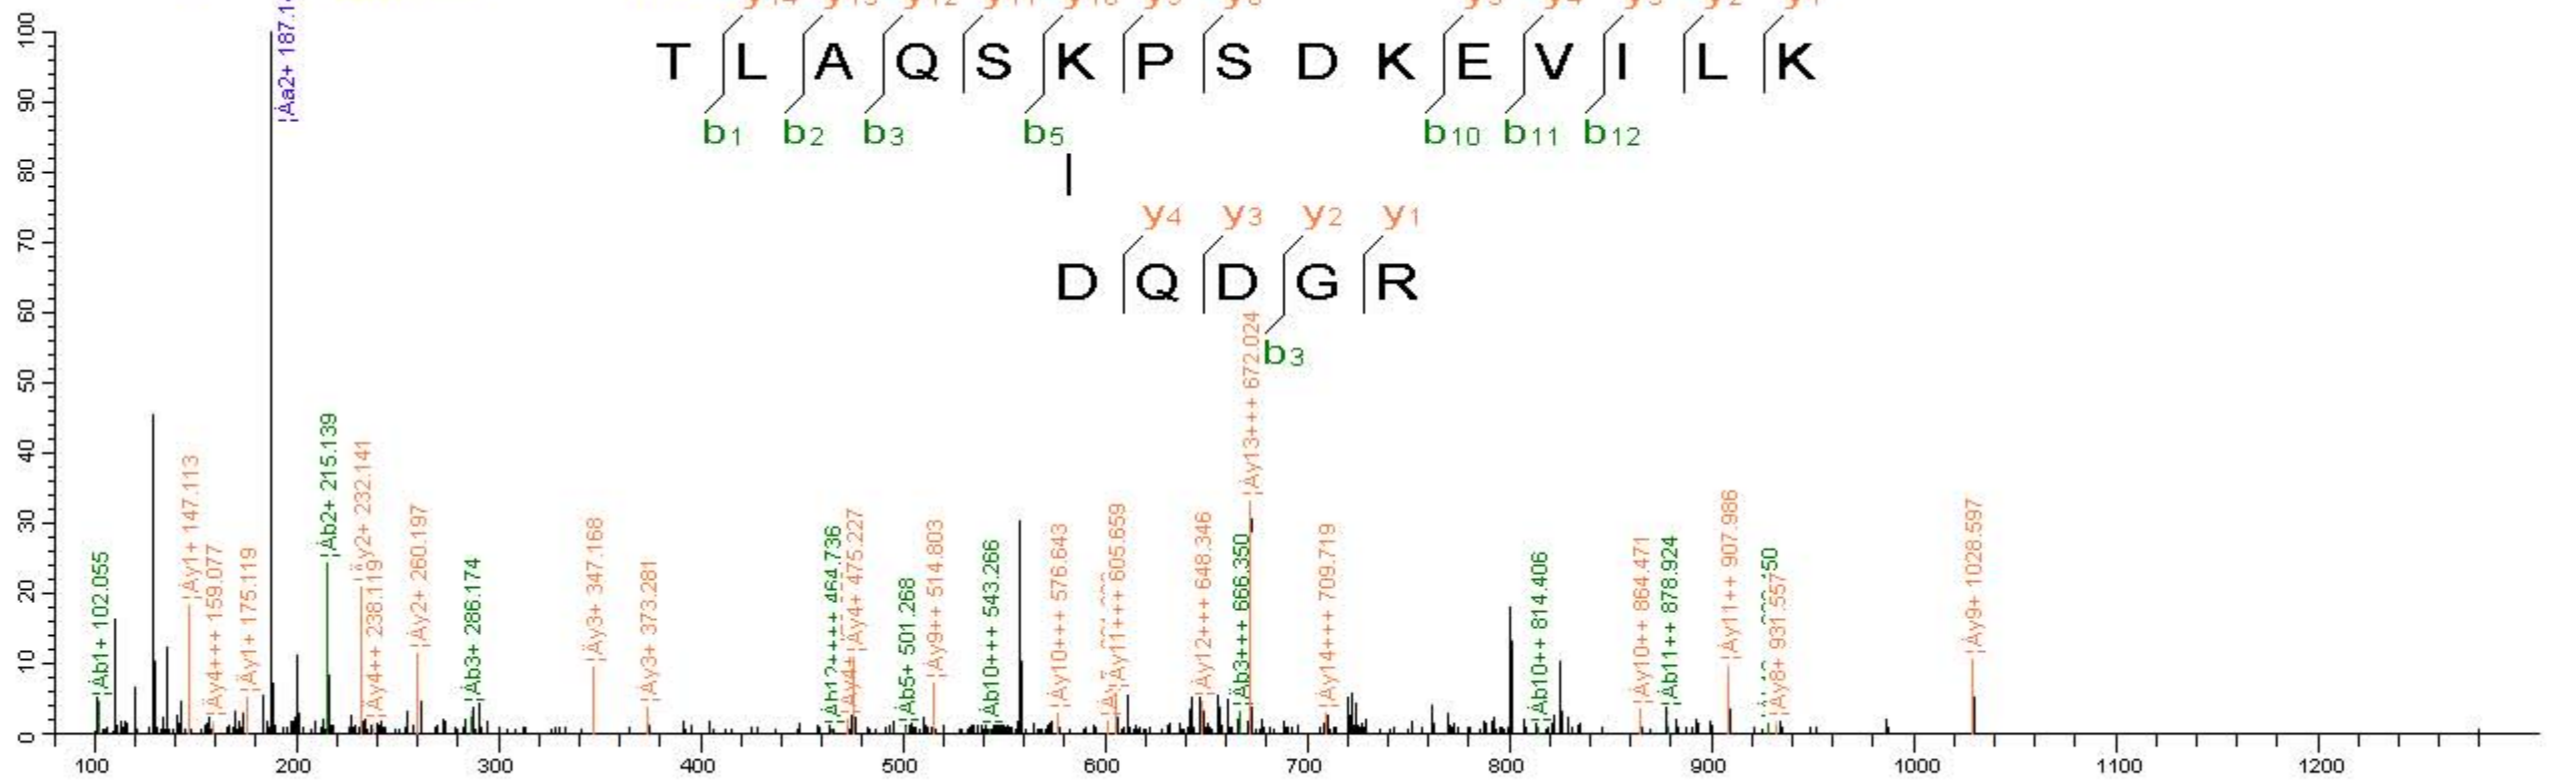

m/z

Charge: 4 MH+: 2840.5502 Score: 2.17e-006

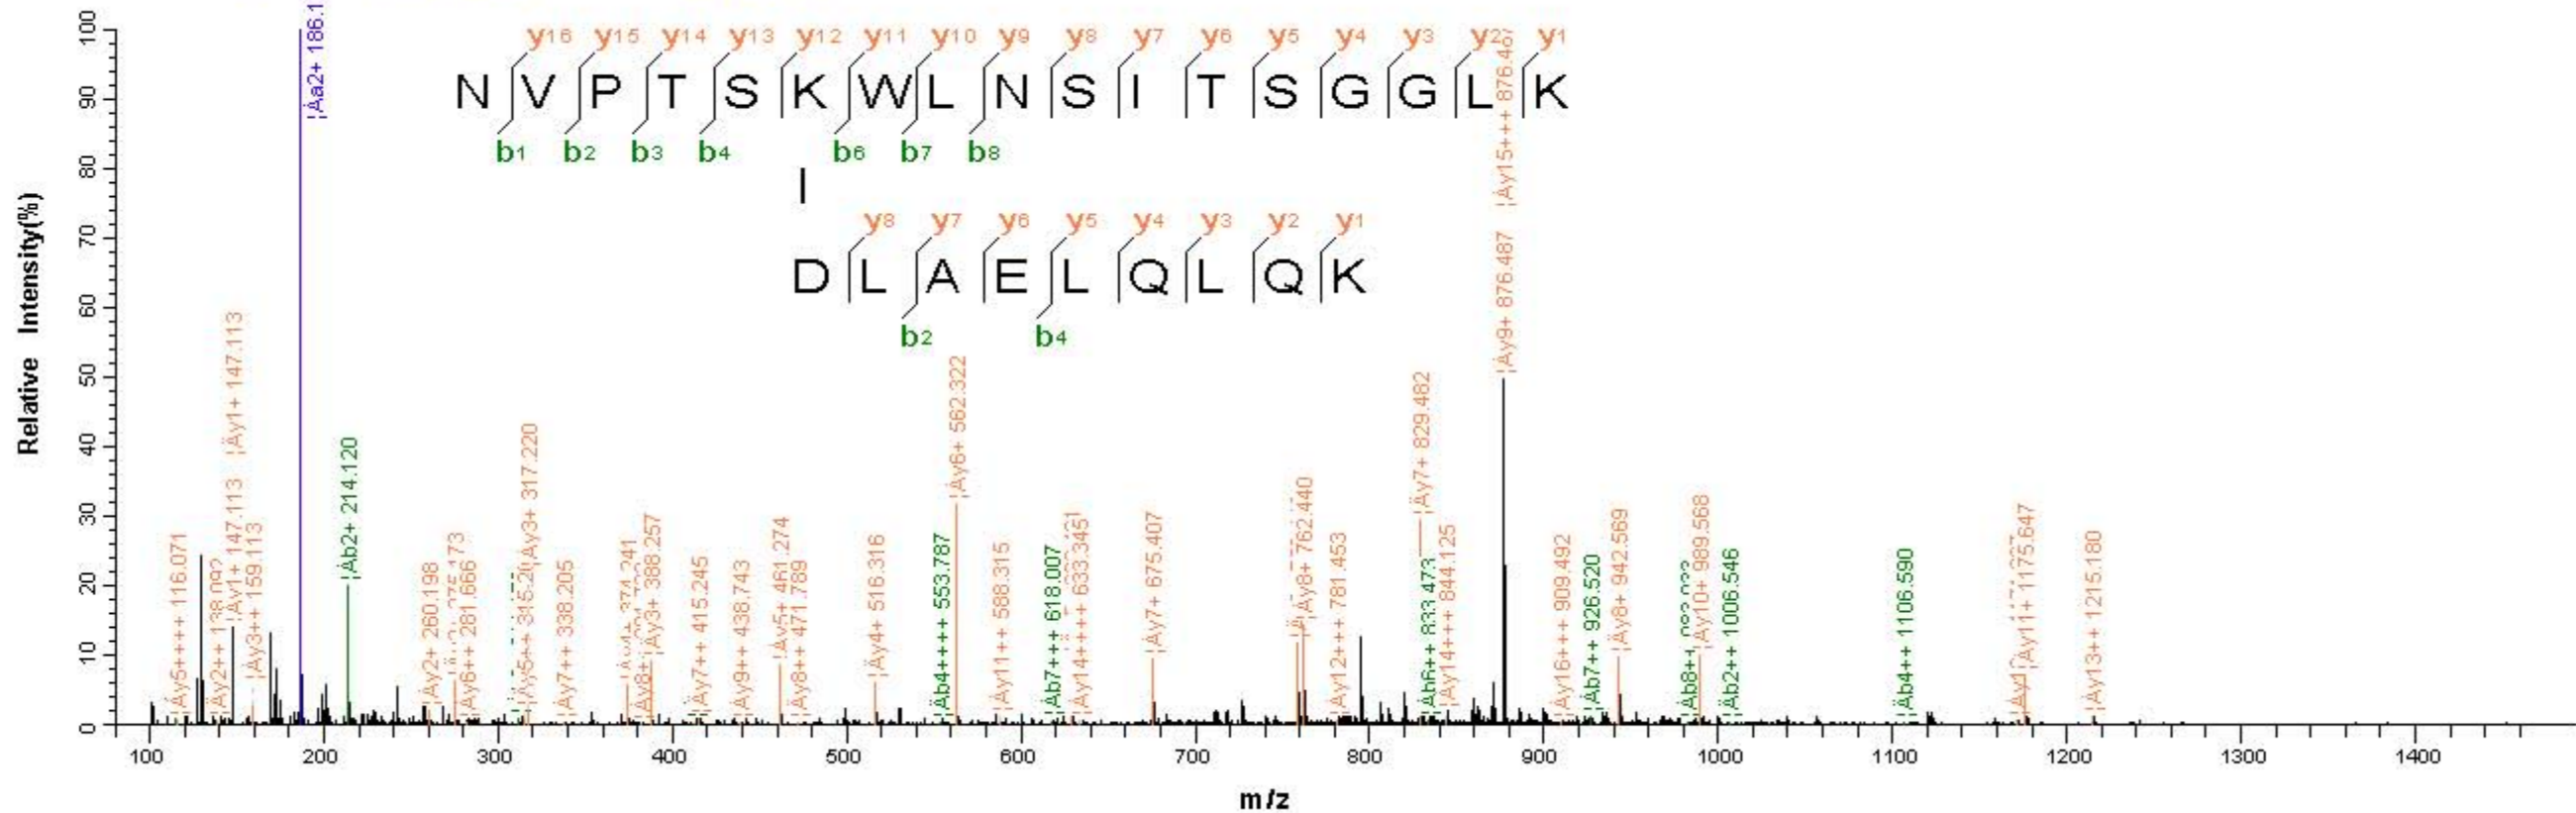

Charge: 4 MH+: 3318.7147 Score: 7.68e-005

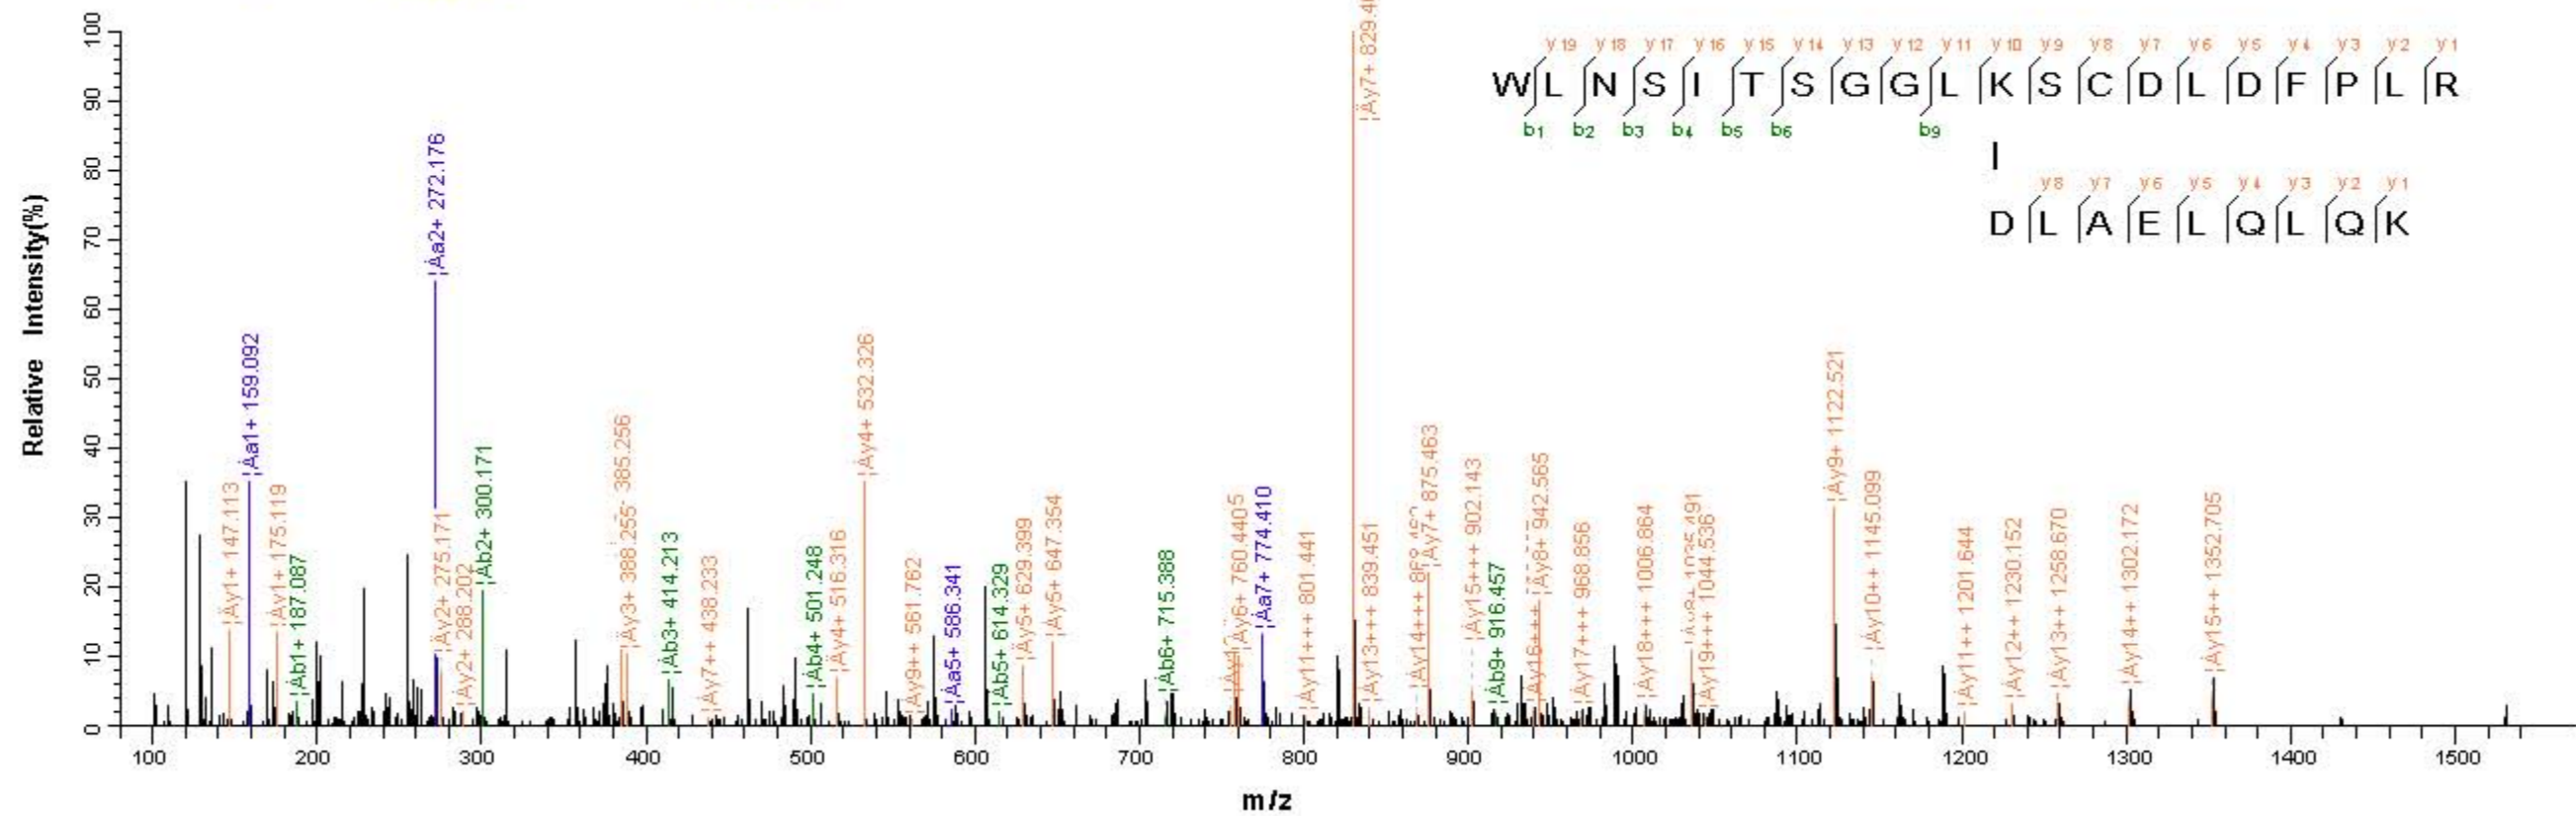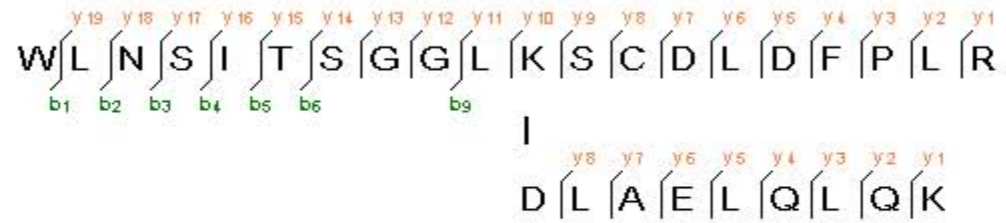

Charge: 4 MH+: 3614.6974 Score: 9.28e-003

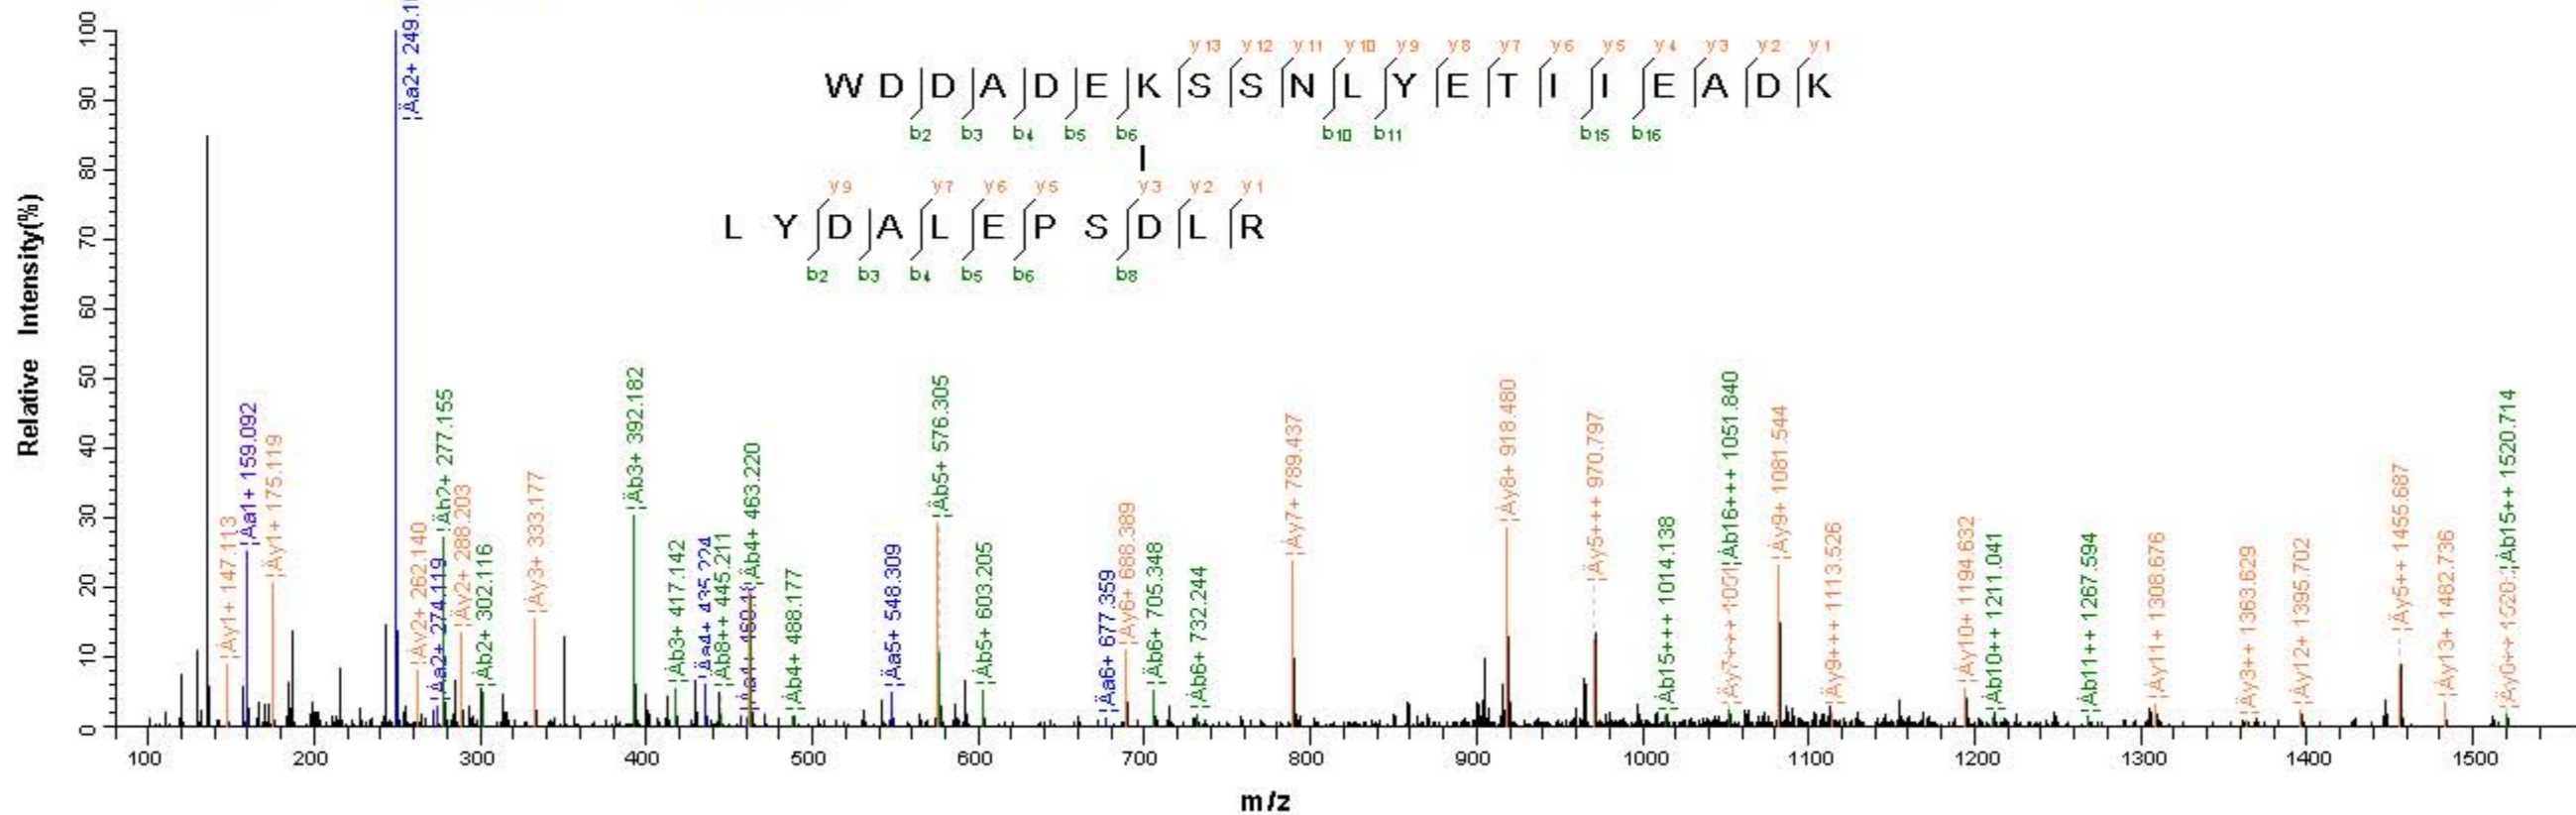

Charge: 4 MH+: 2654.2079 Score: 2.03e-005

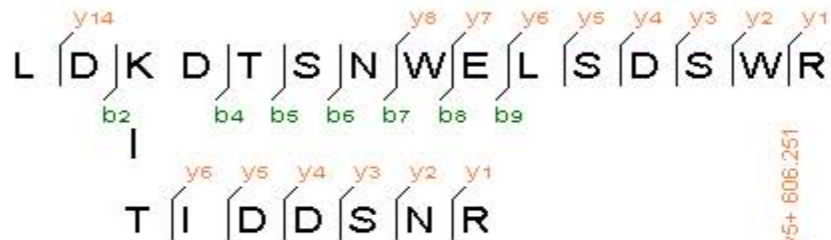

Relative Intensity (%)

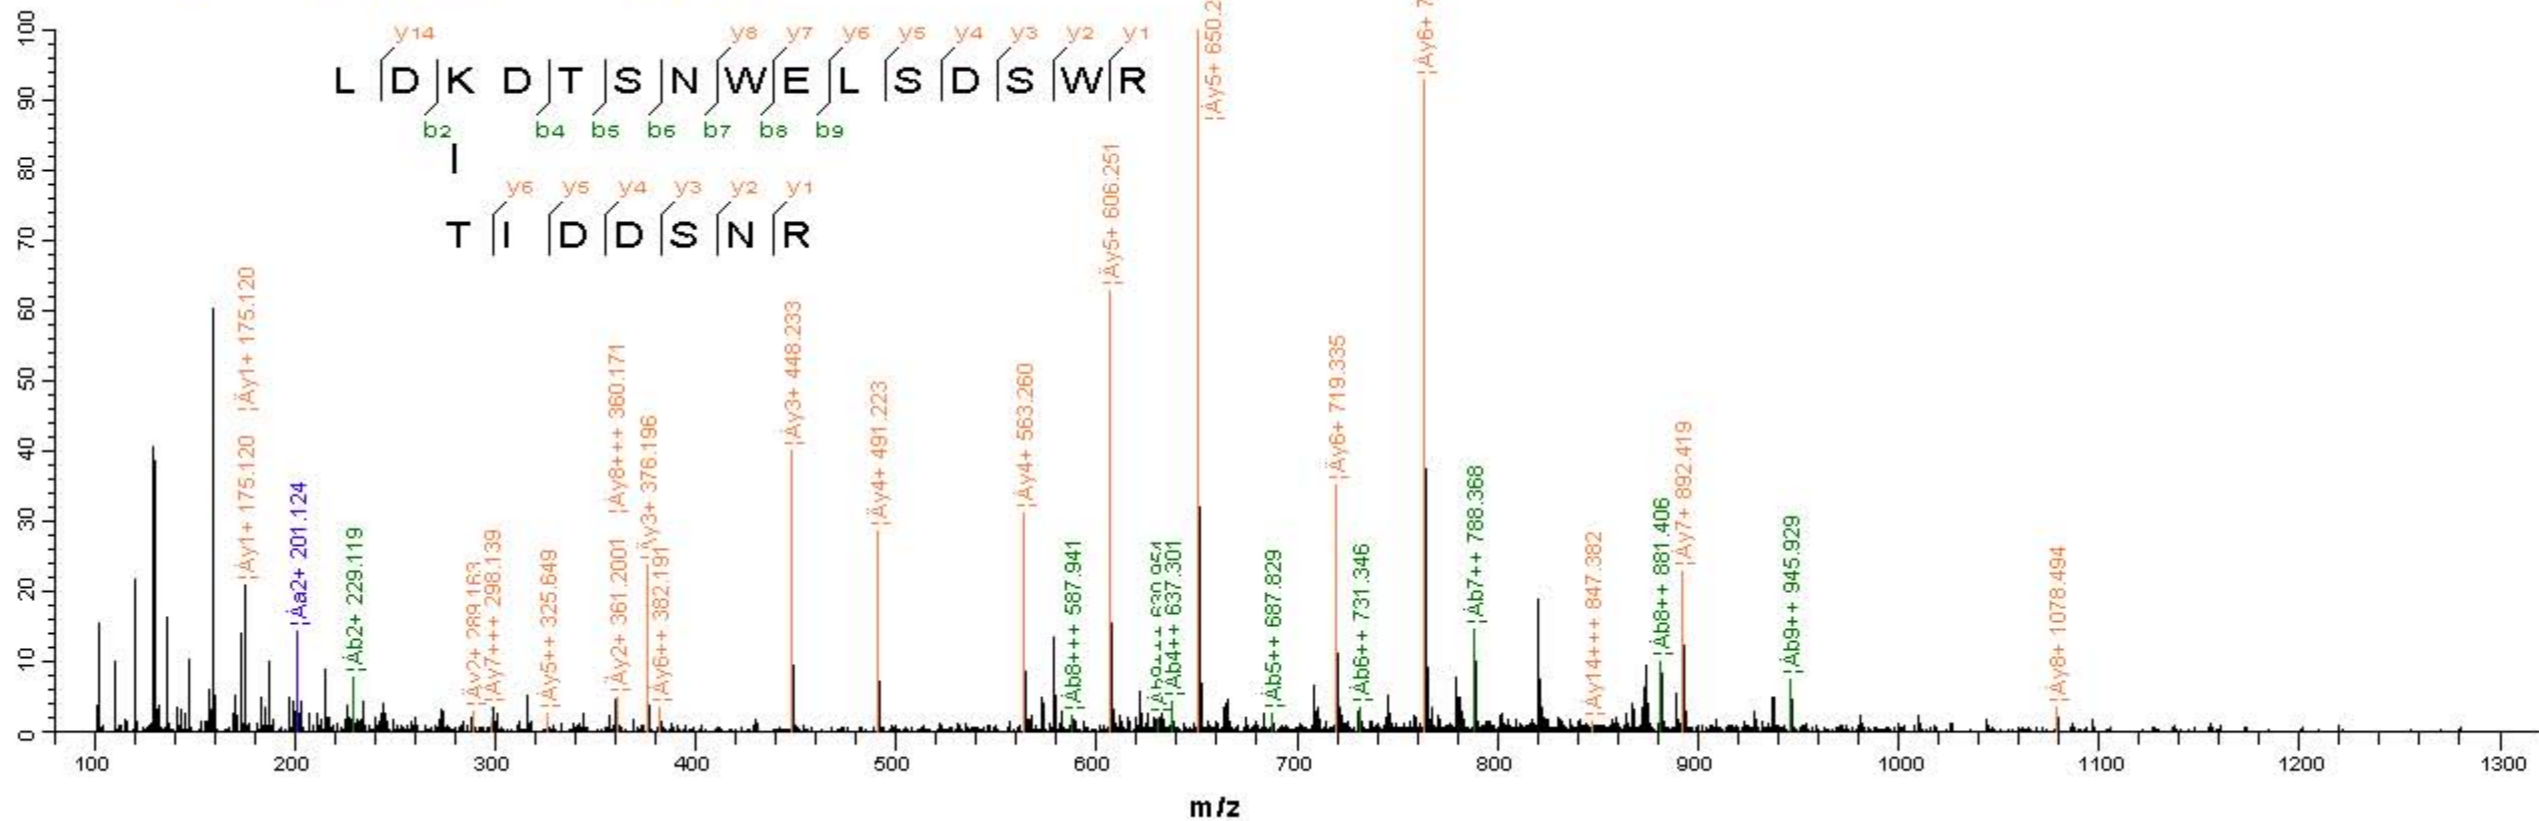

Charge: 4 MH+: 2061.0697 Score: 5.50e-005

Relative Intensity(%)

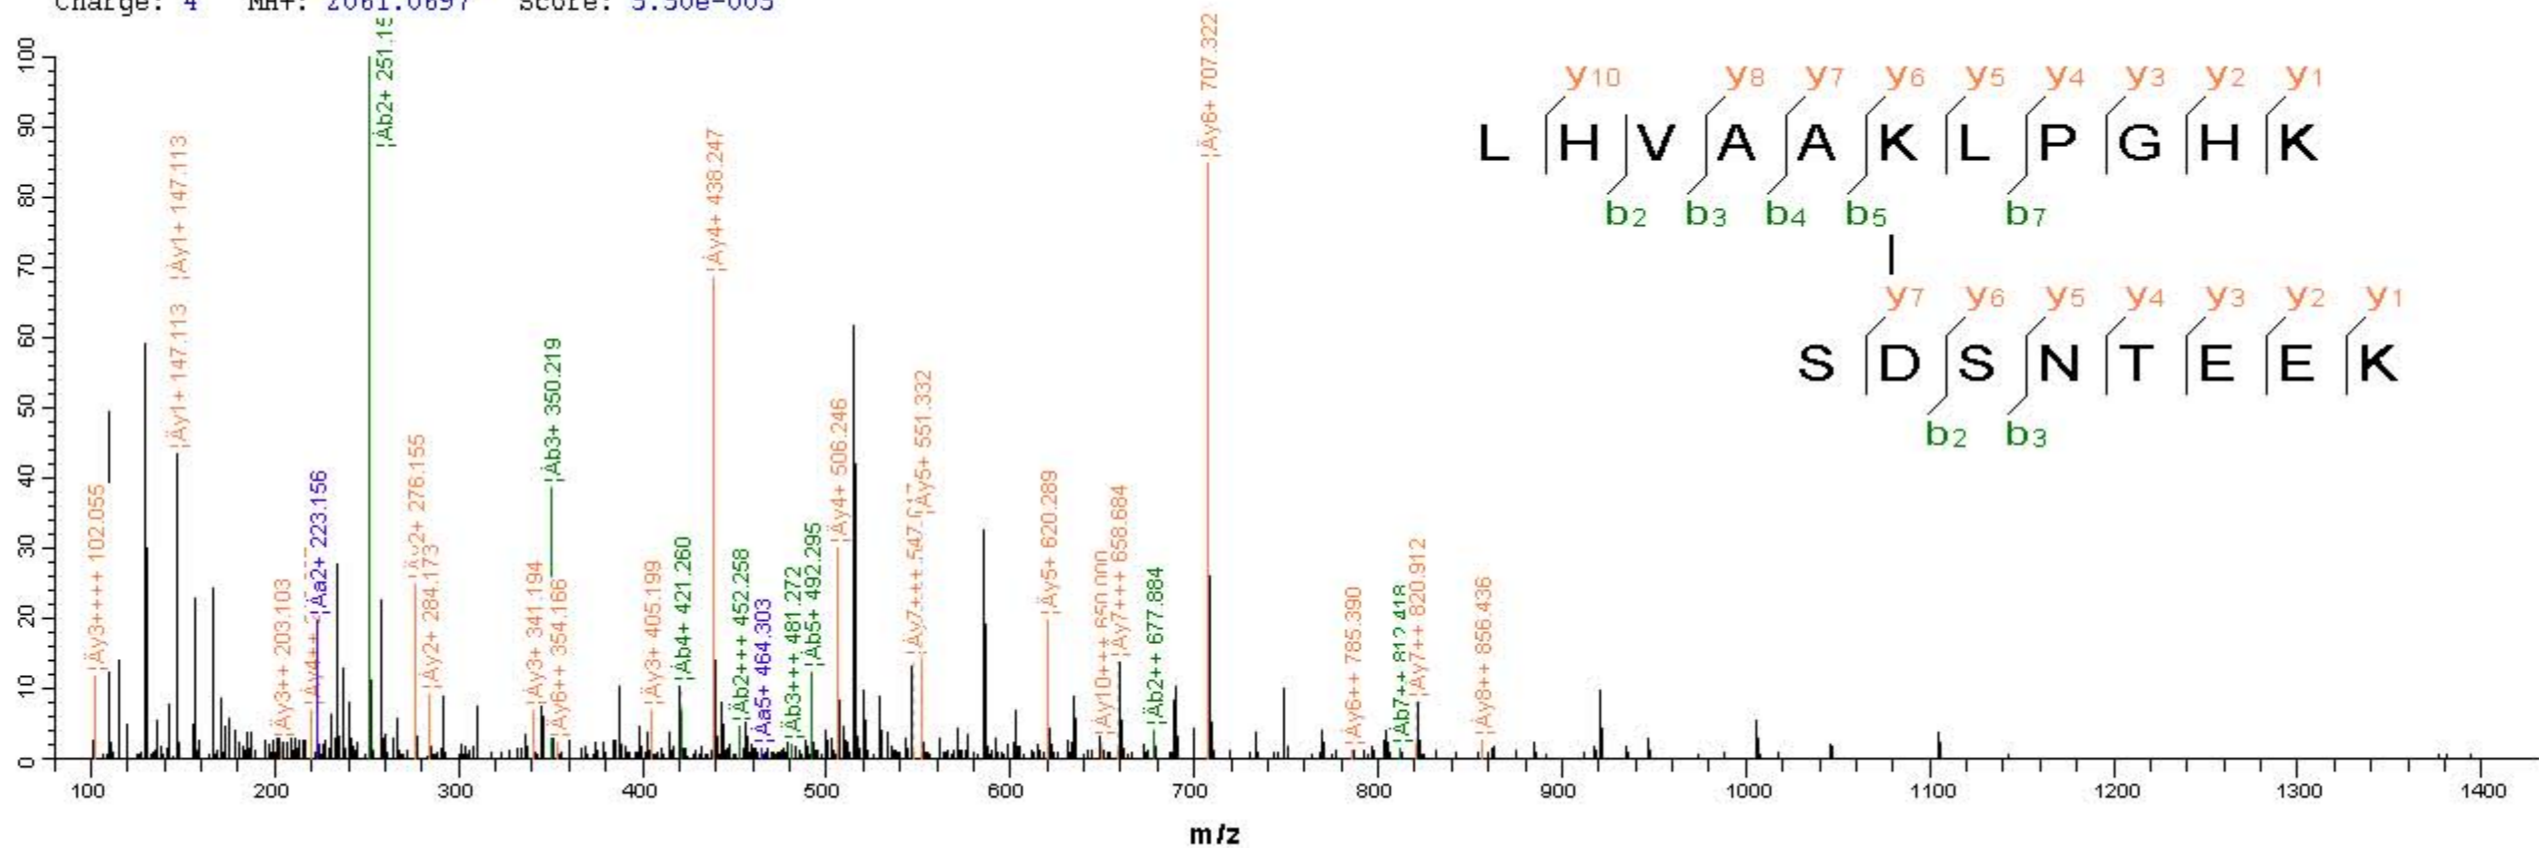

Charge: 5 MH+: 4376.2715 Score: 9.06e-003

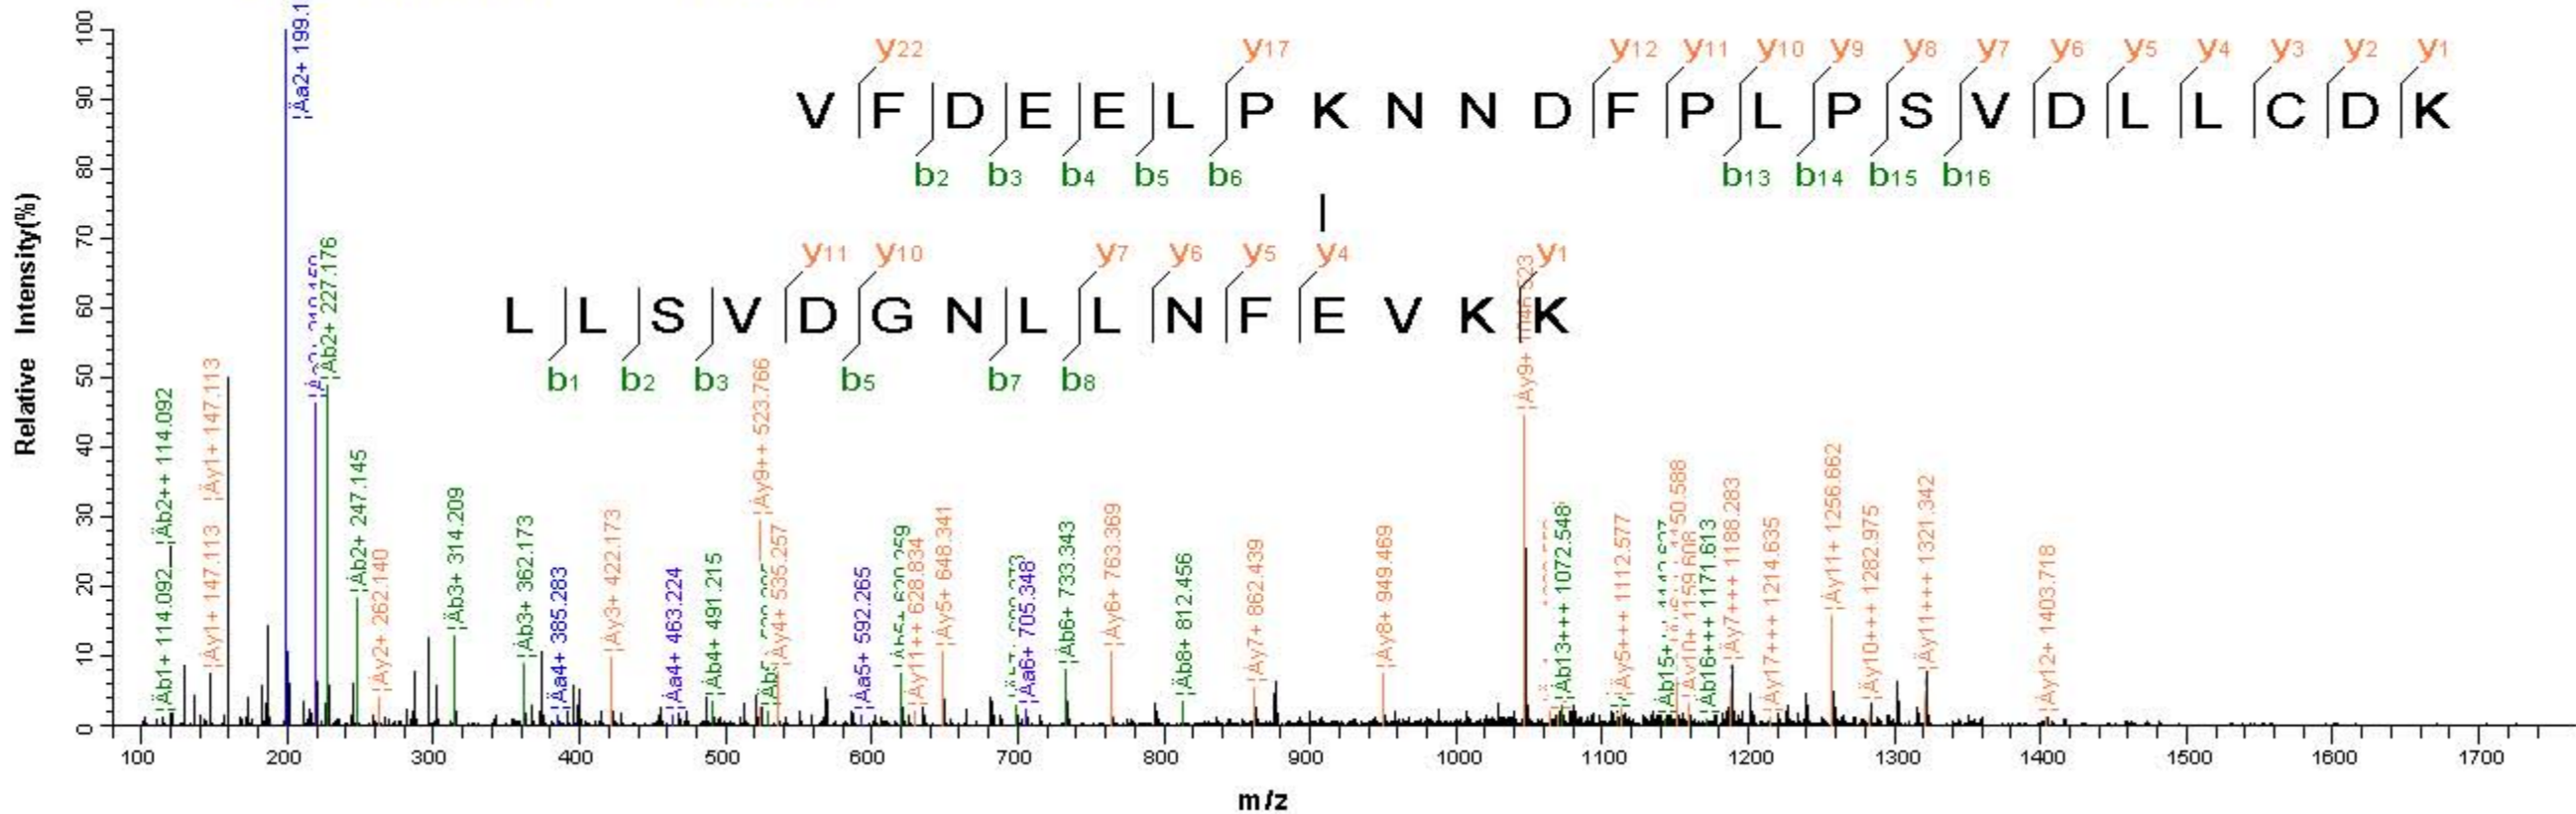



Charge: 5 MH+: 3927.9365 Score: 6.88e-014

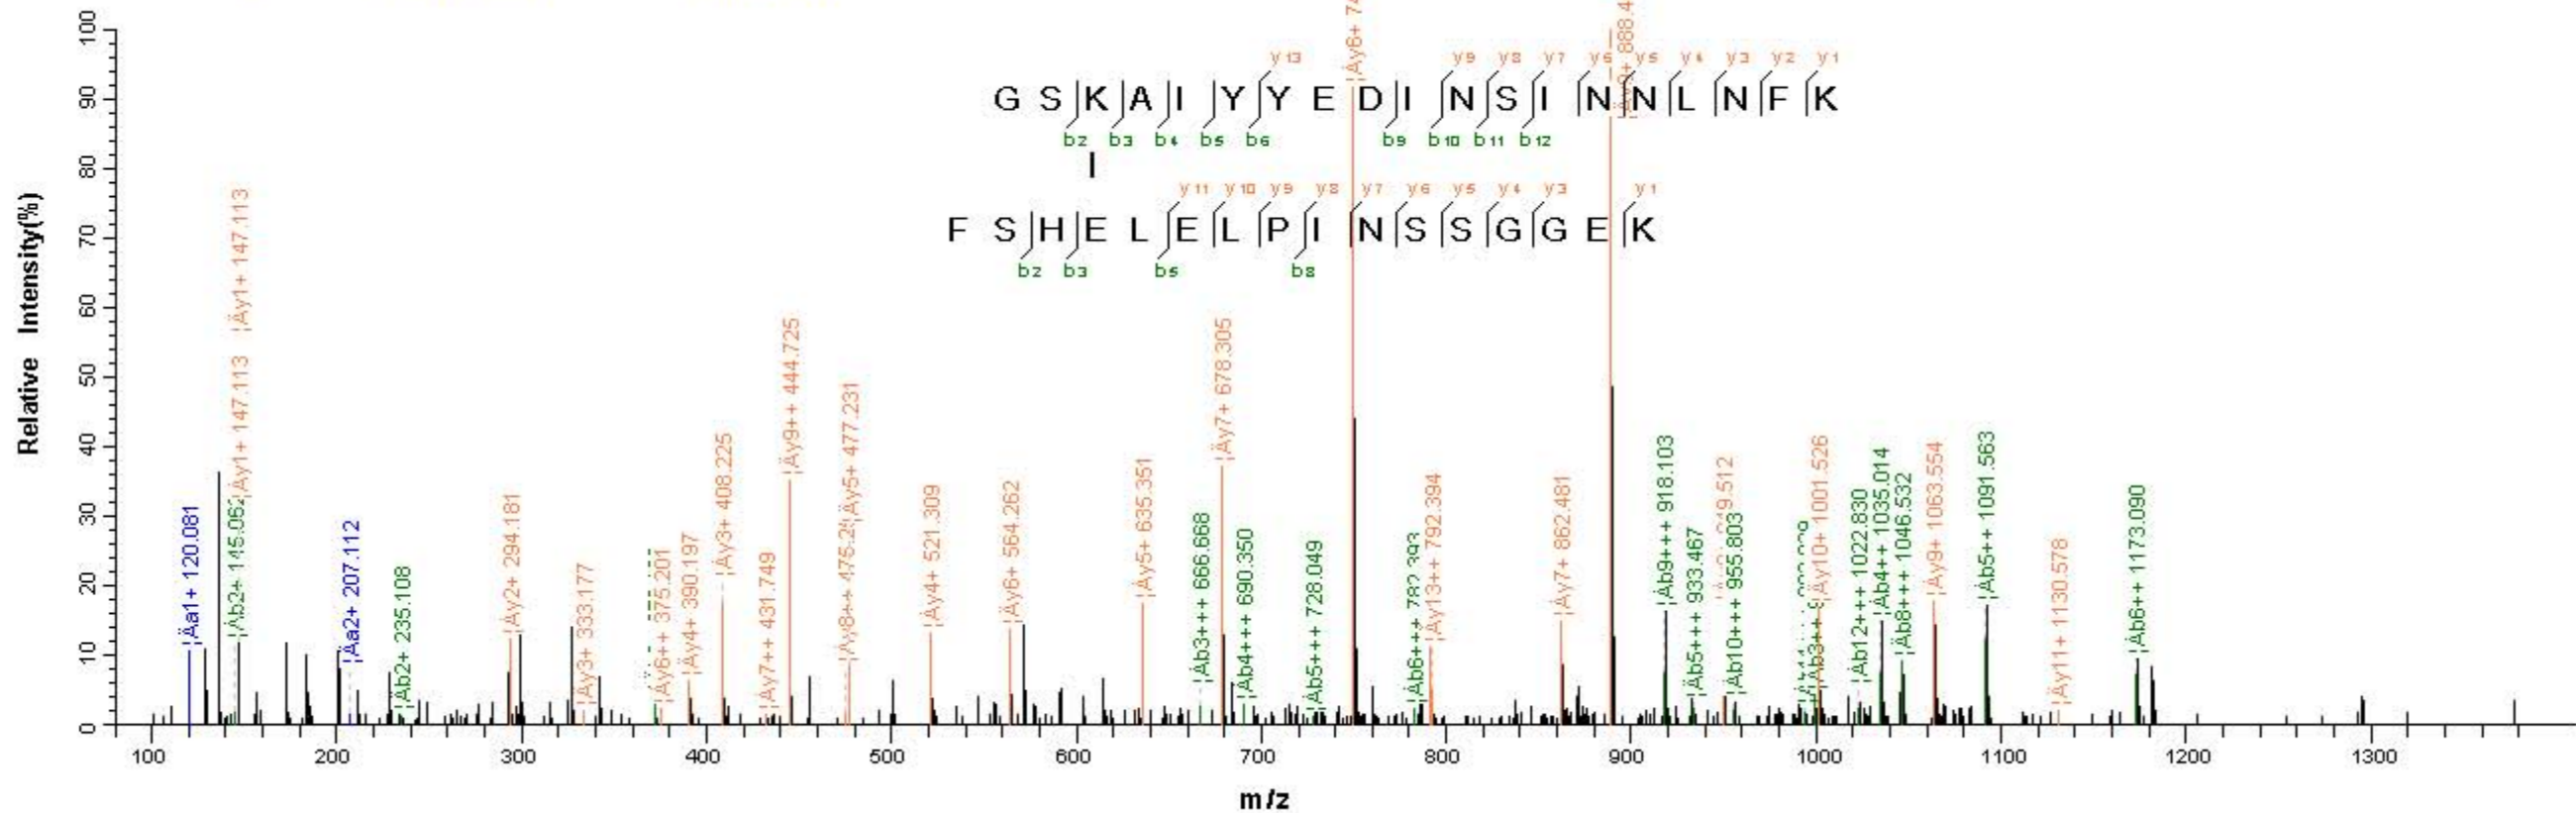

Charge: 5 MH+: 2713.4926 Score: 5.41e-007

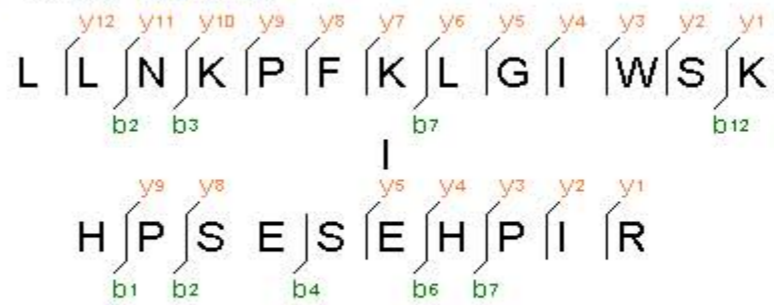

Relative Intensity(%)

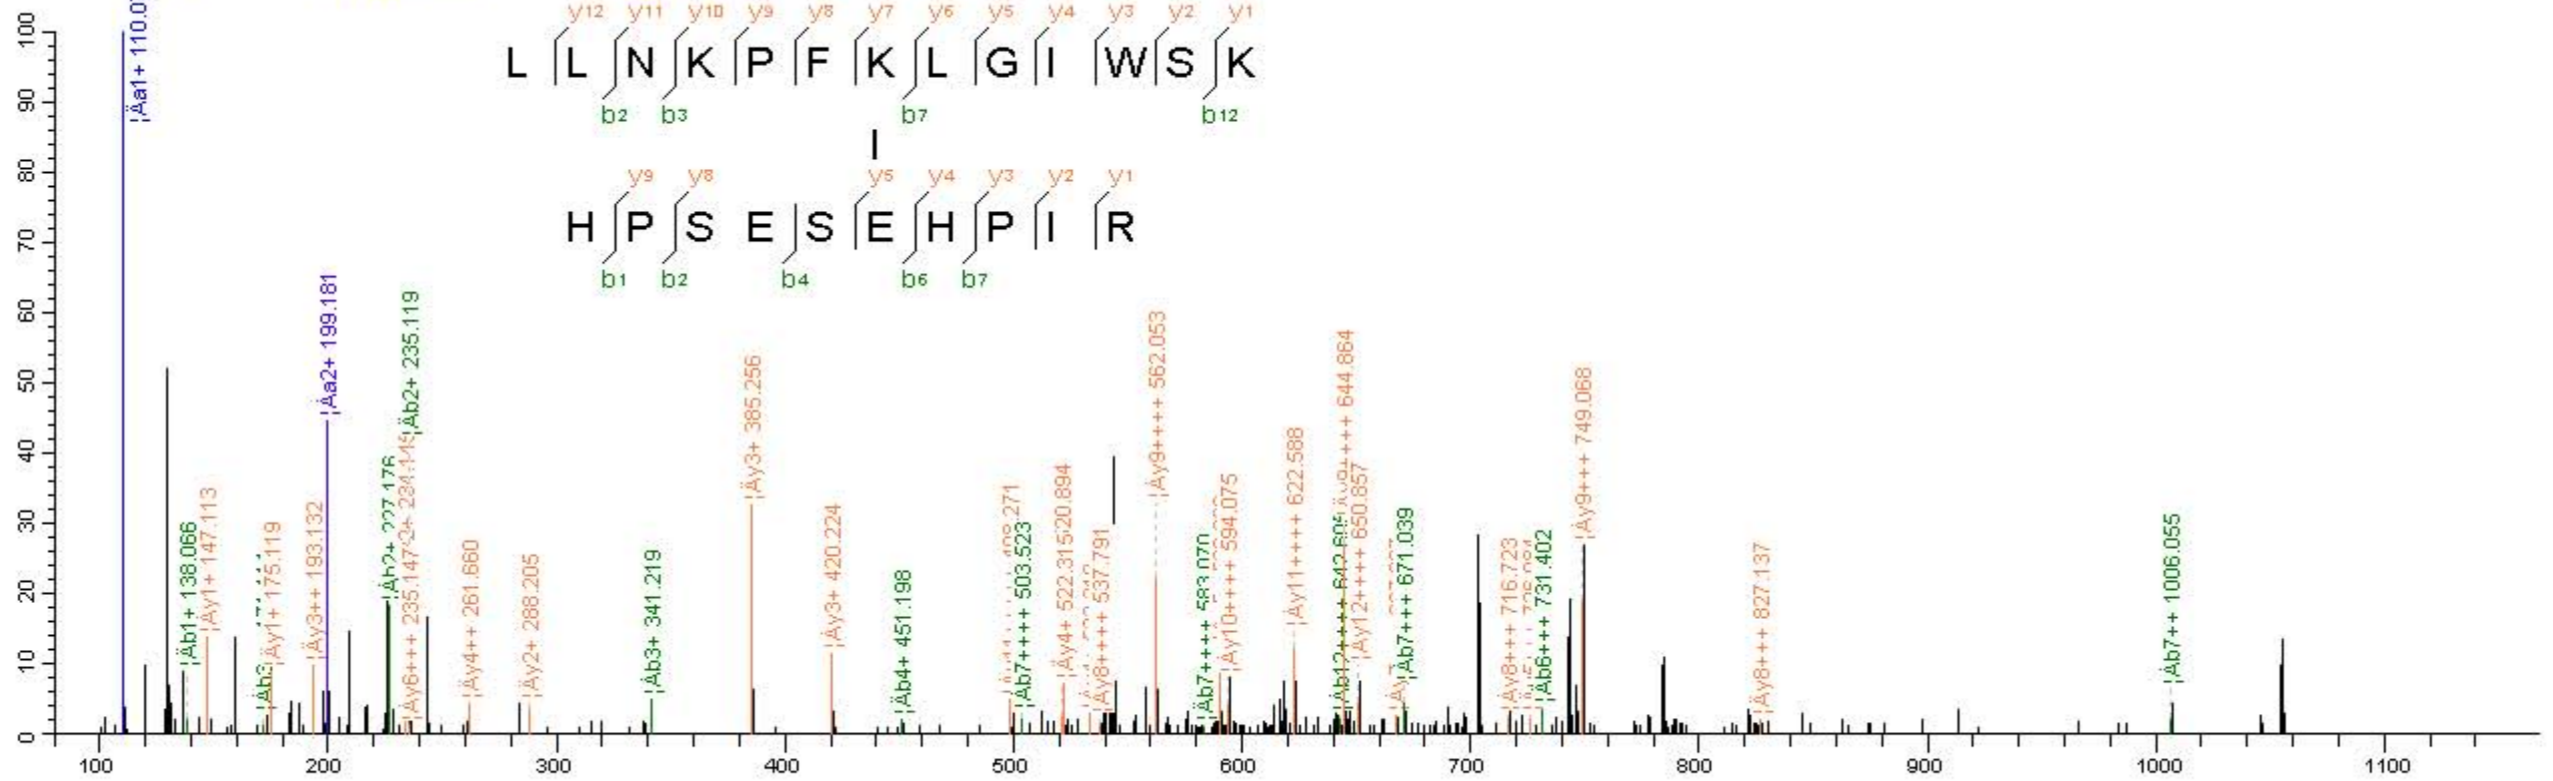

Charge: 5 MH+: 3144.7694 Score: 3.44e-004

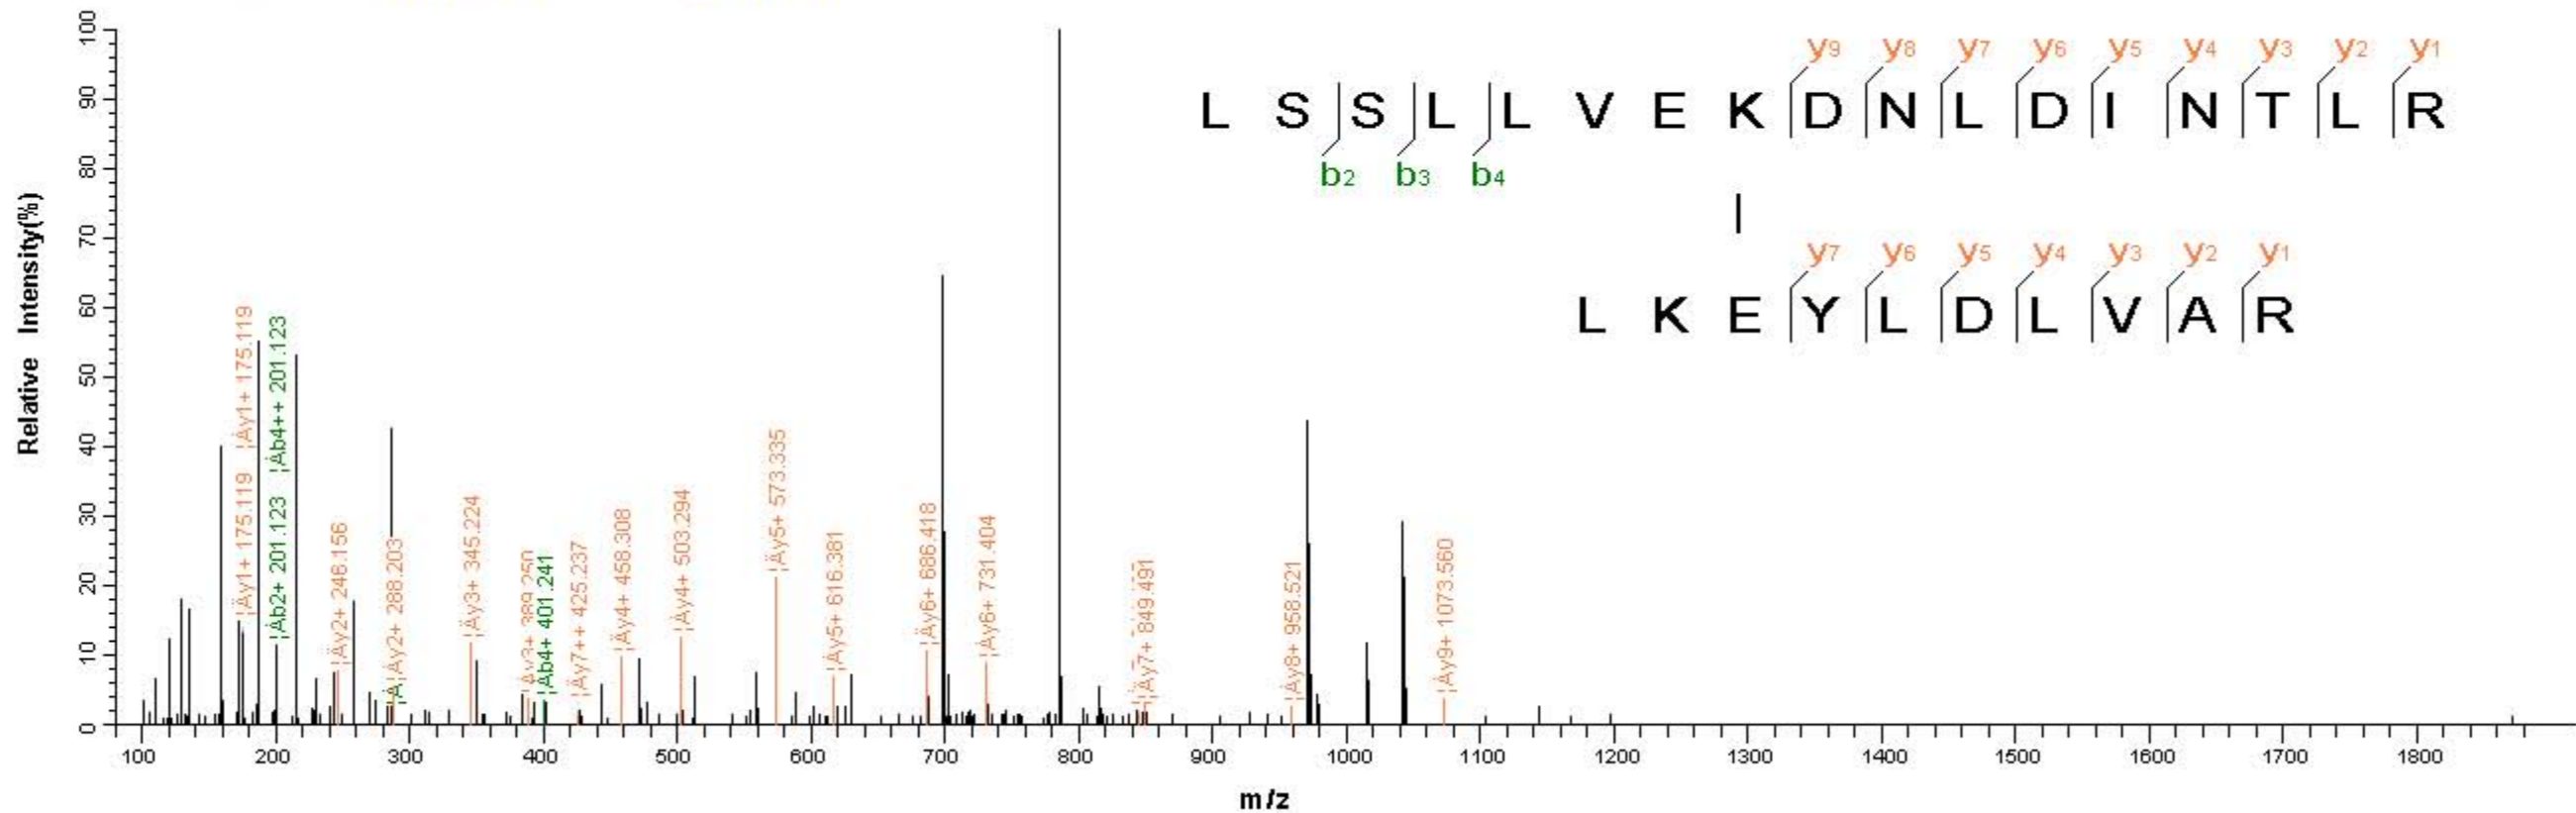

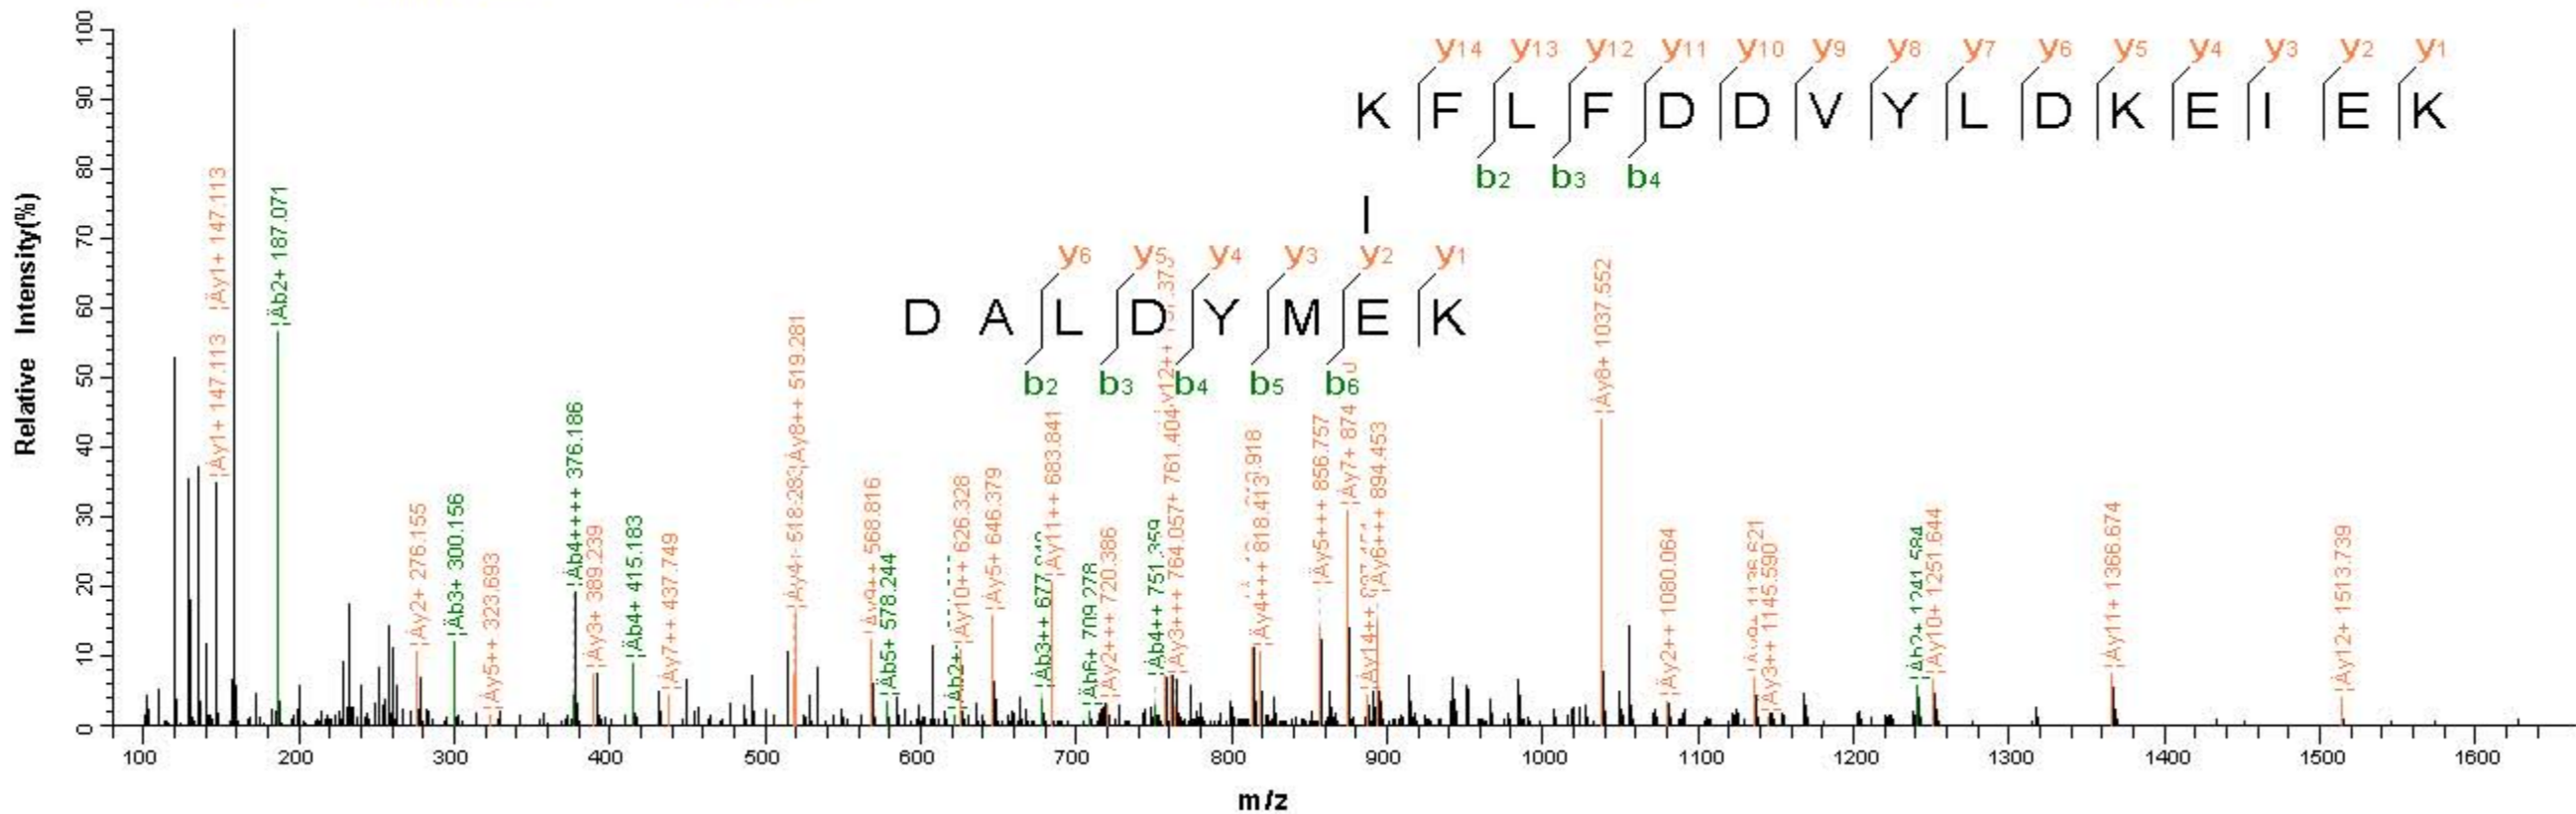

Charge: 5 MH+: 3121.6685 Score: 2.71e-003

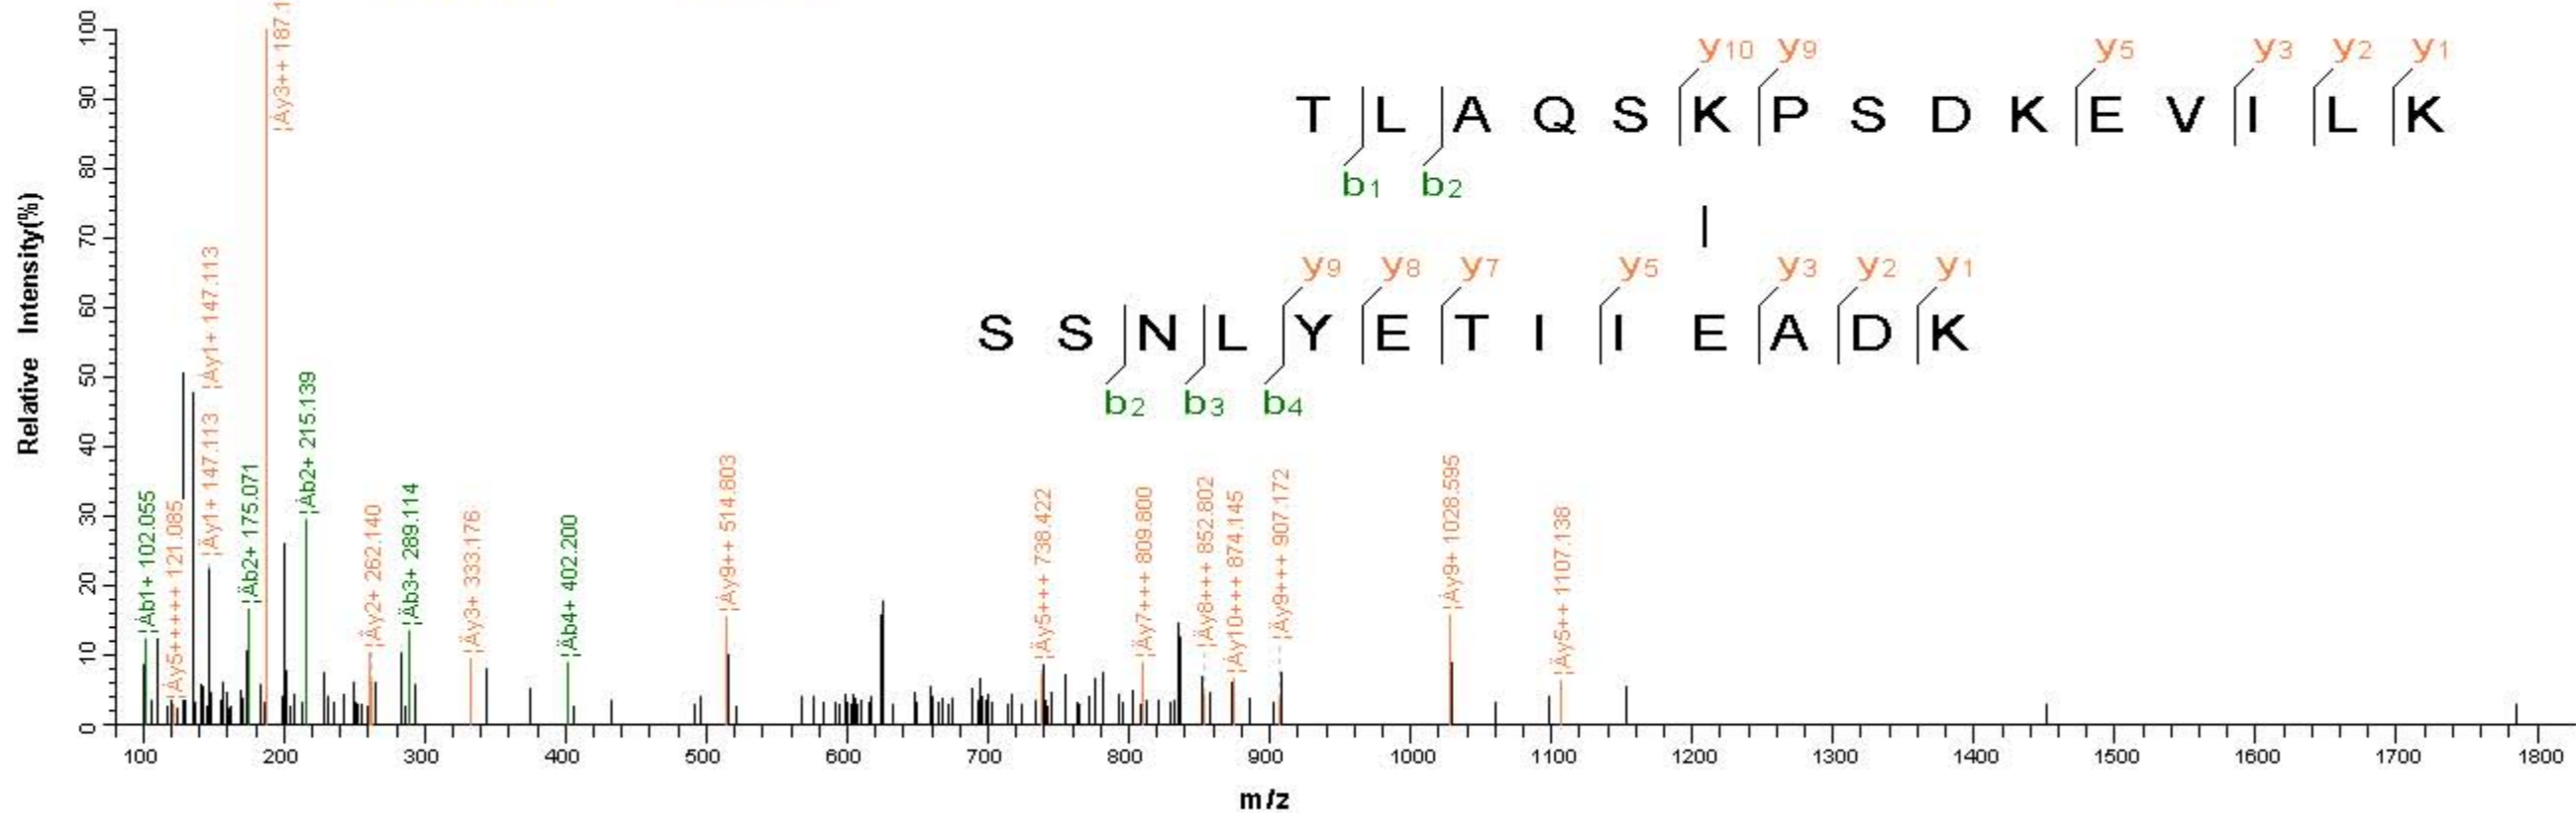

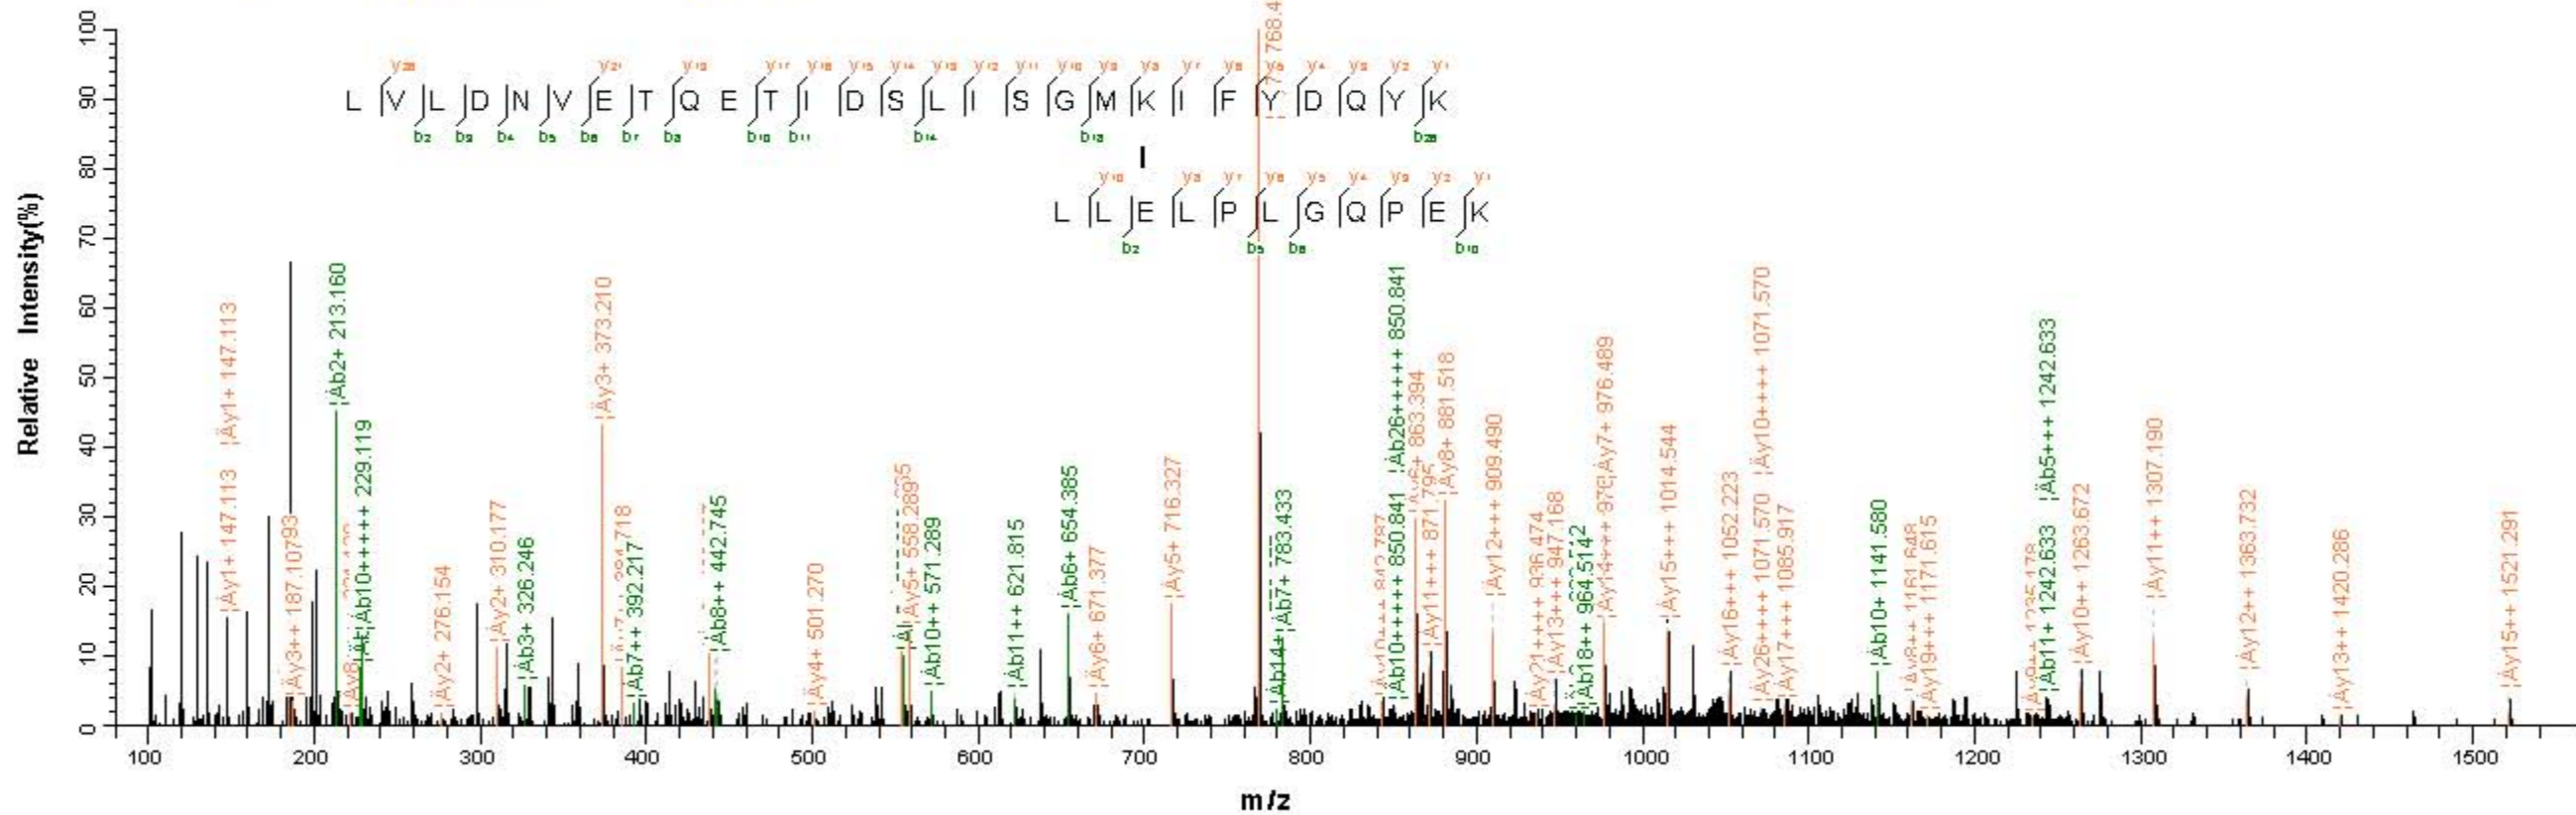

Charge: 5 MH+: 3423.7132 Score: 4.36e-012

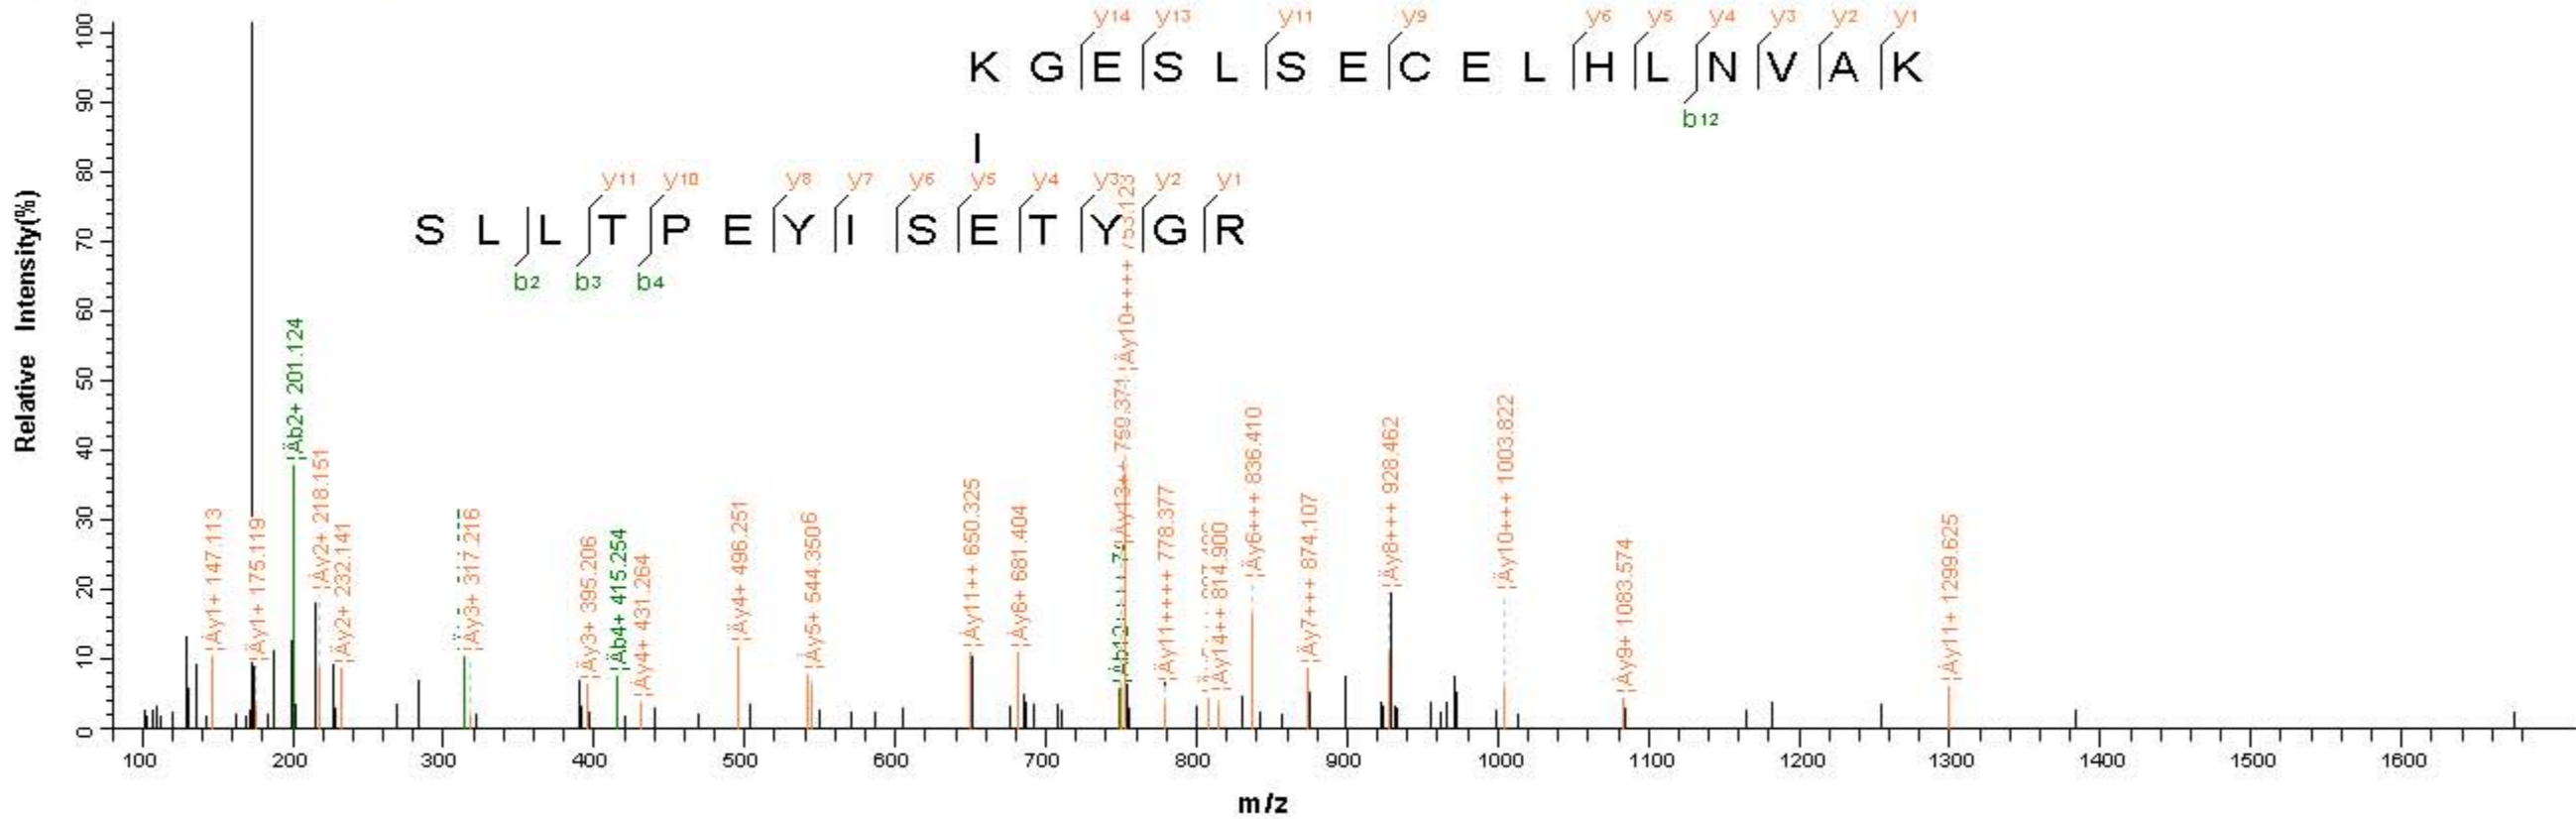

Charge: 4    MH+: 2420.3270    Score: 3.49e-005

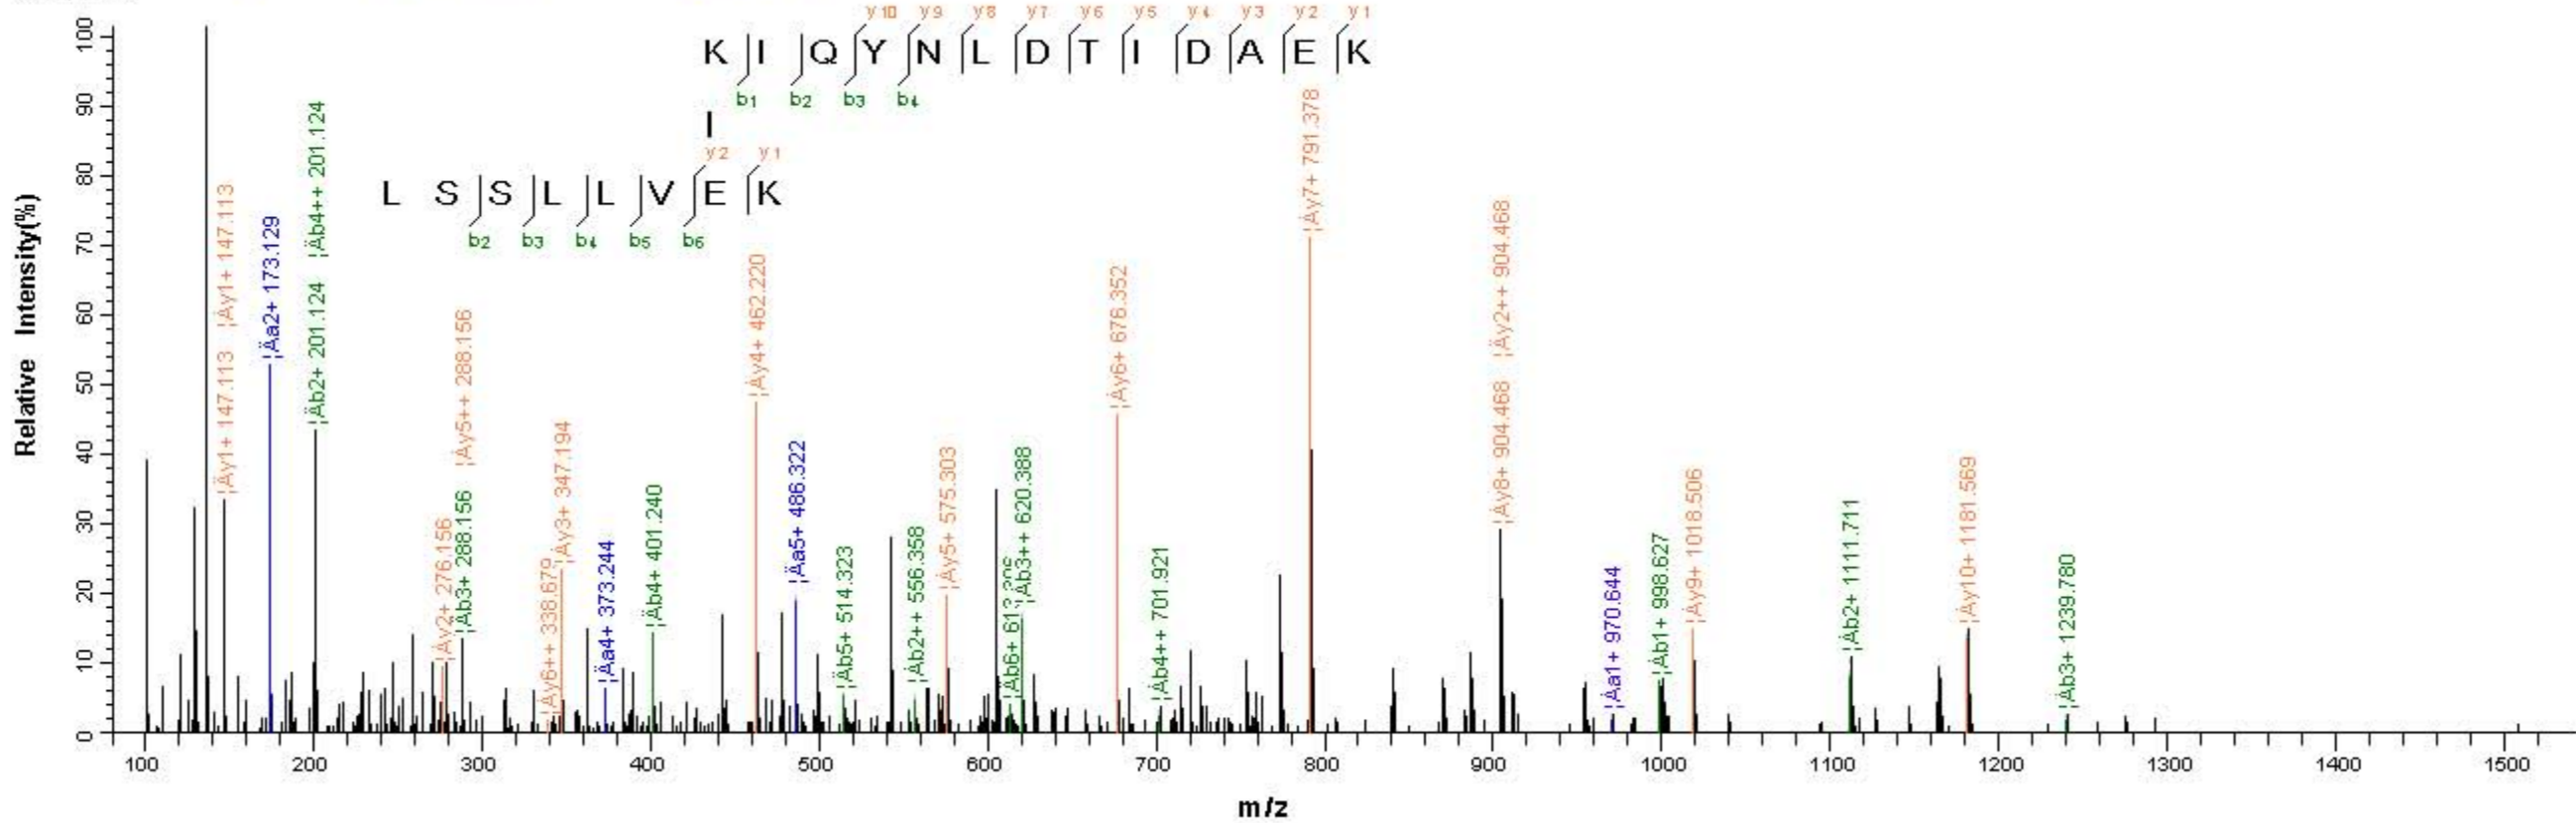



Charge: 6    MH+: 5129.7364    Score: 9.95e-004

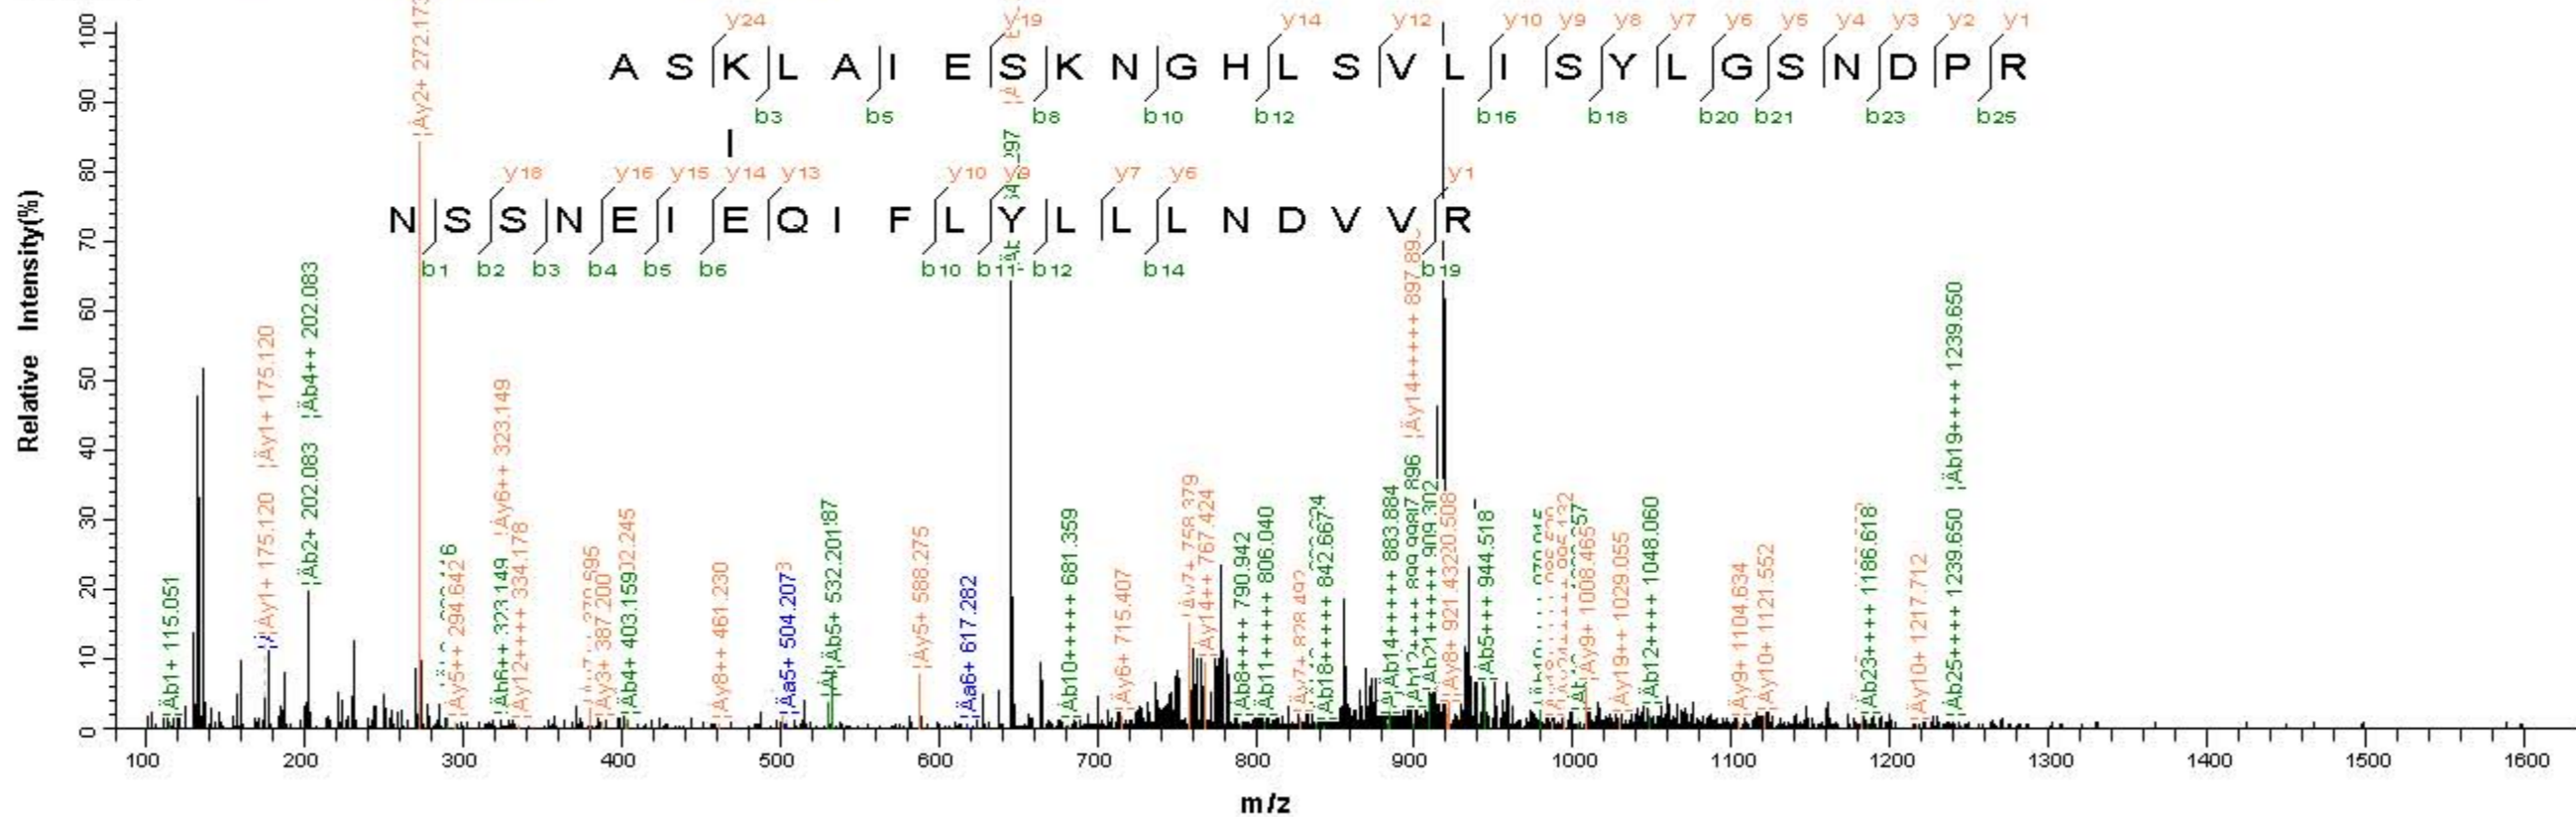

Charge: 4 MH+: 2150.0543 Score: 5.81e-005

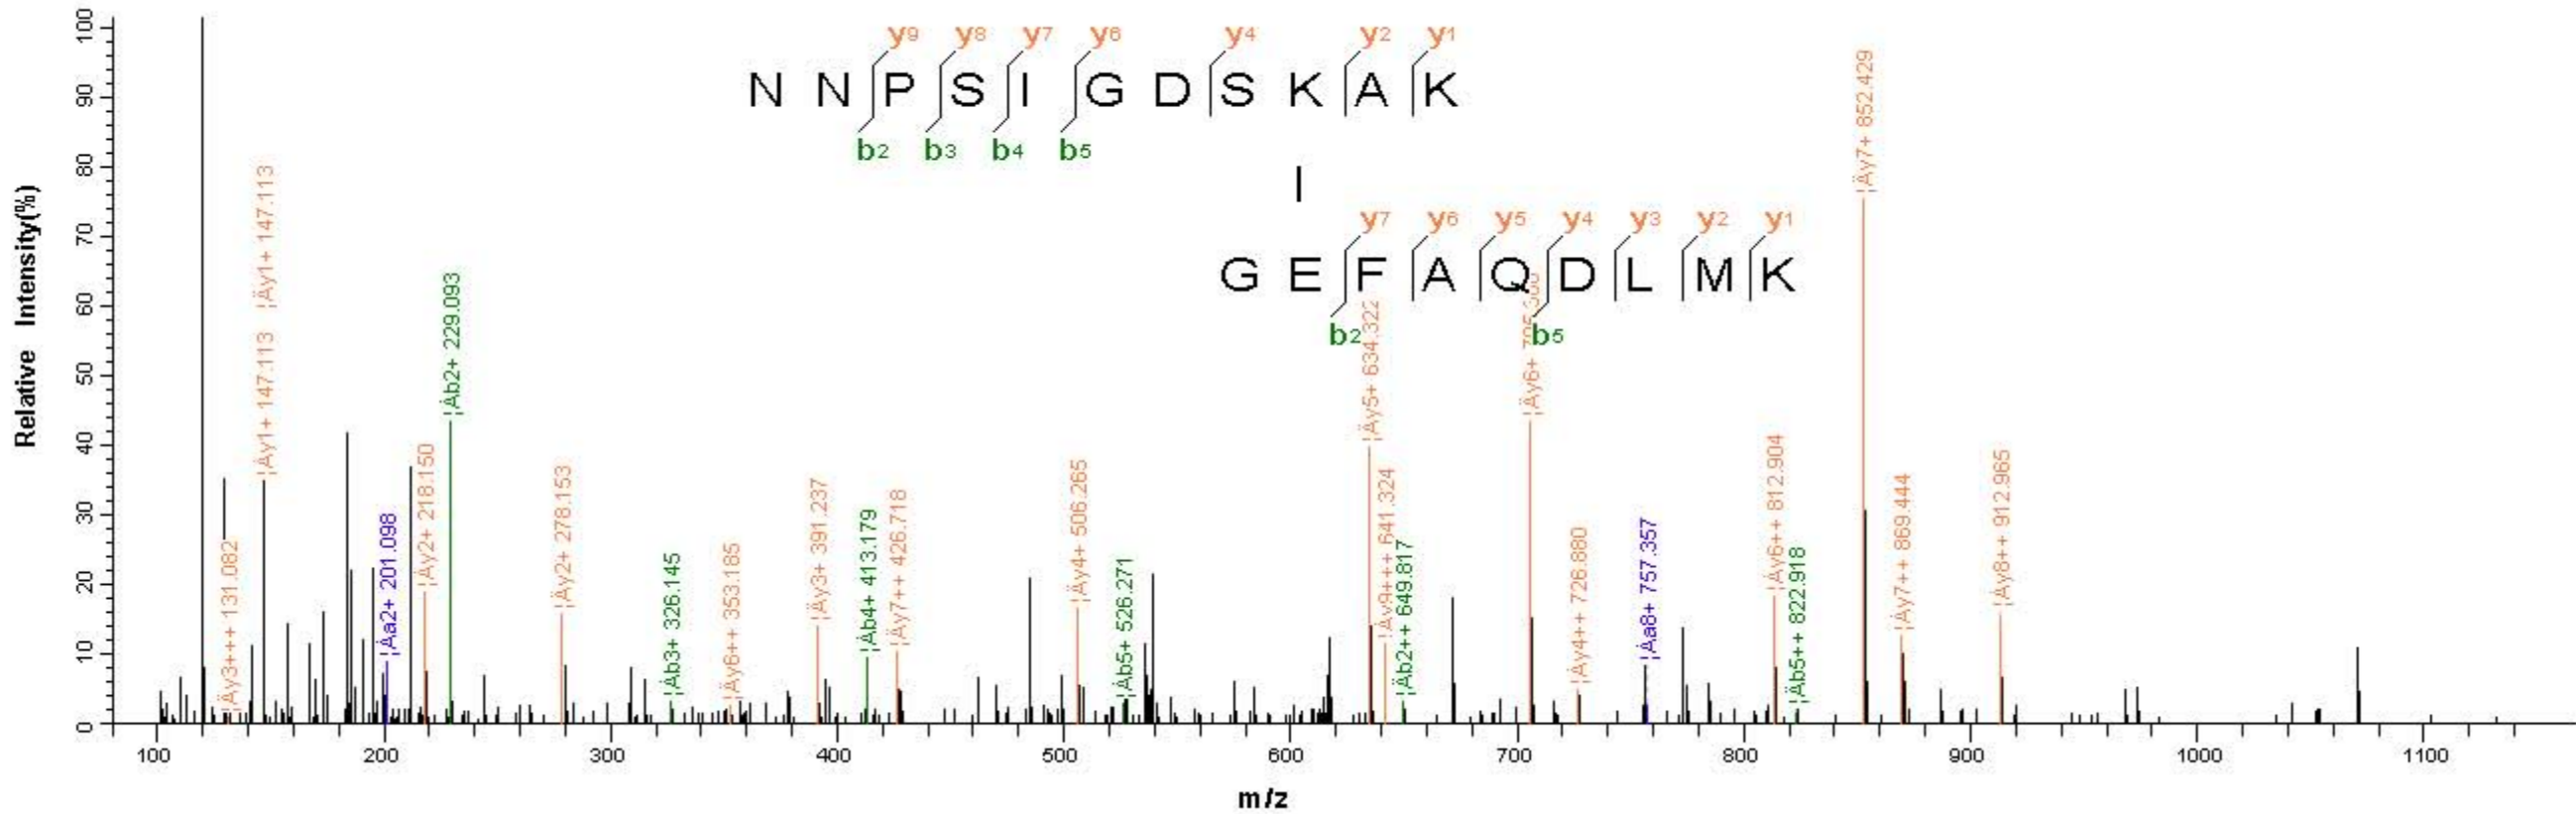

Charge: 4 MH+: 2840.5519 Score: 5.16e-005

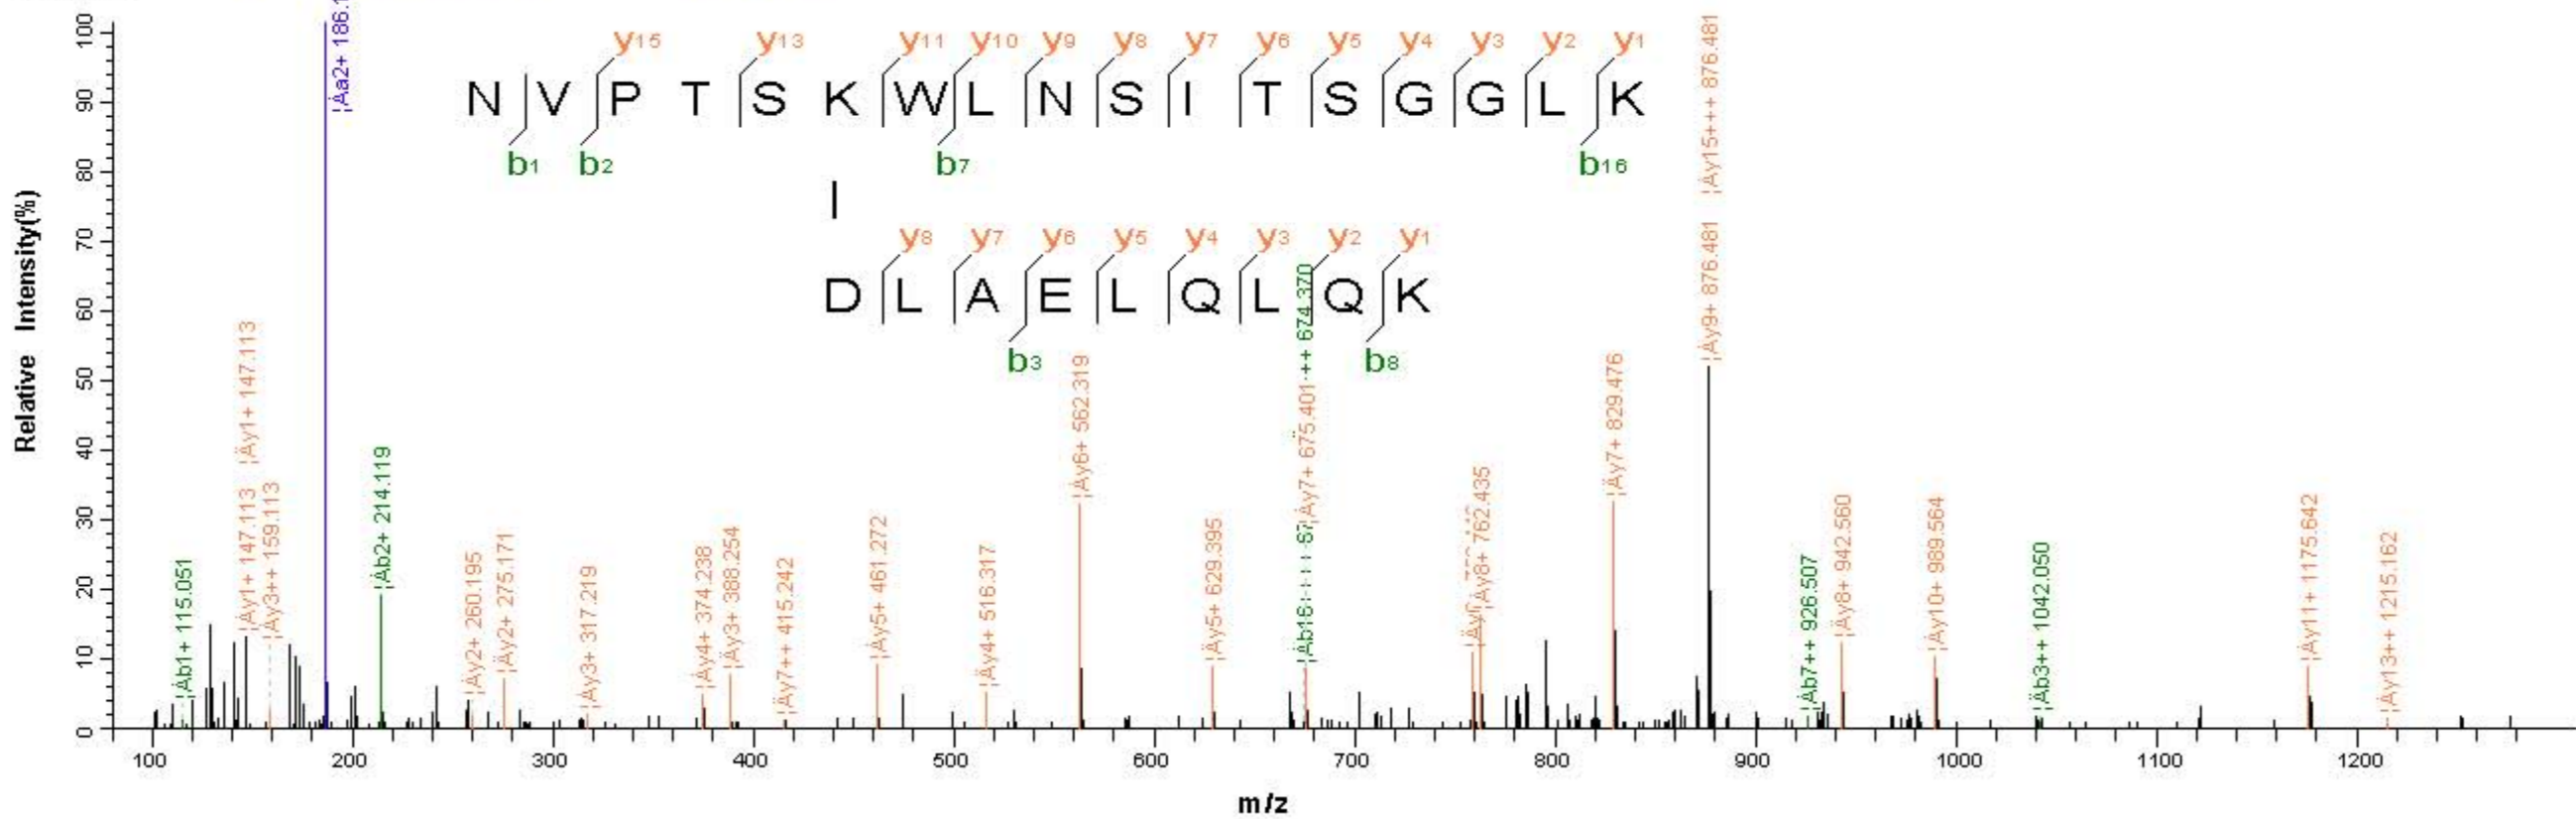

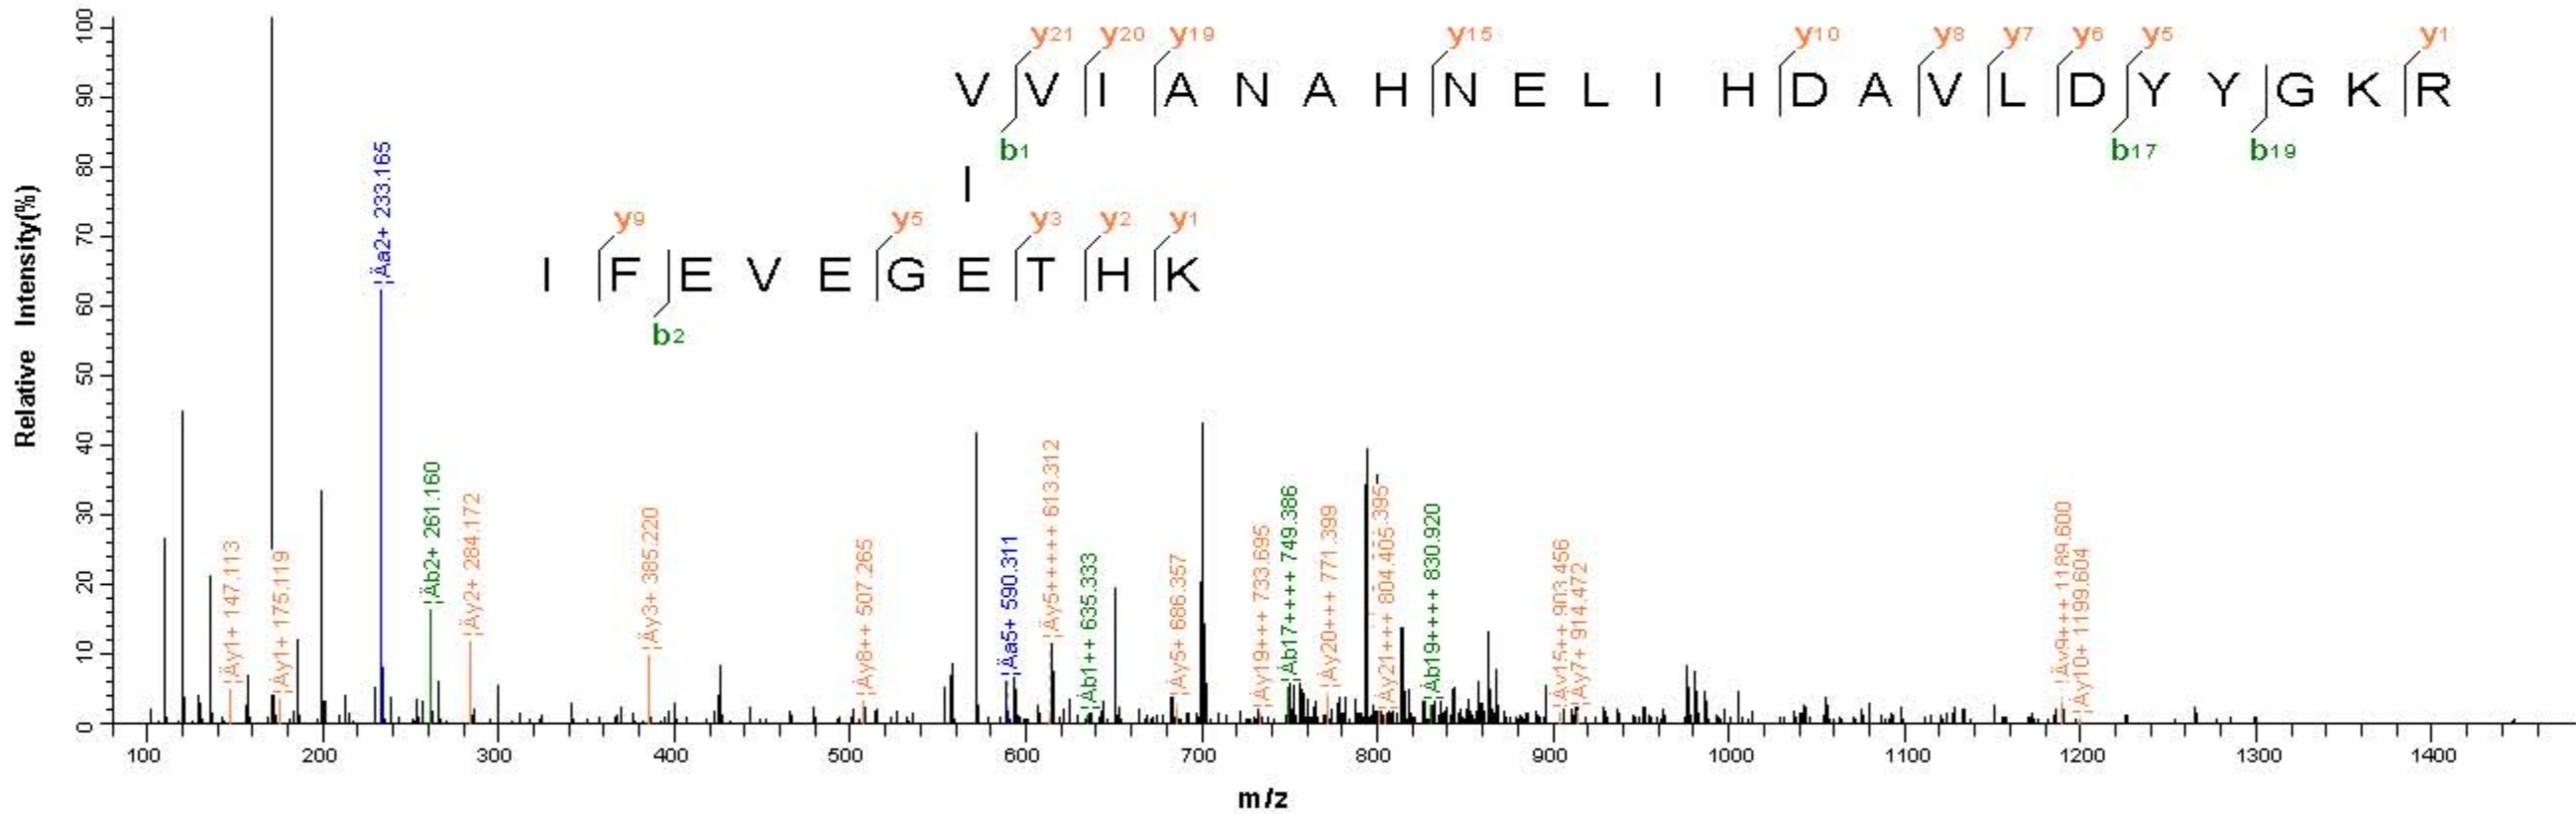

Charge: 5 MH+: 3344.7520 Score: 6.66e-006

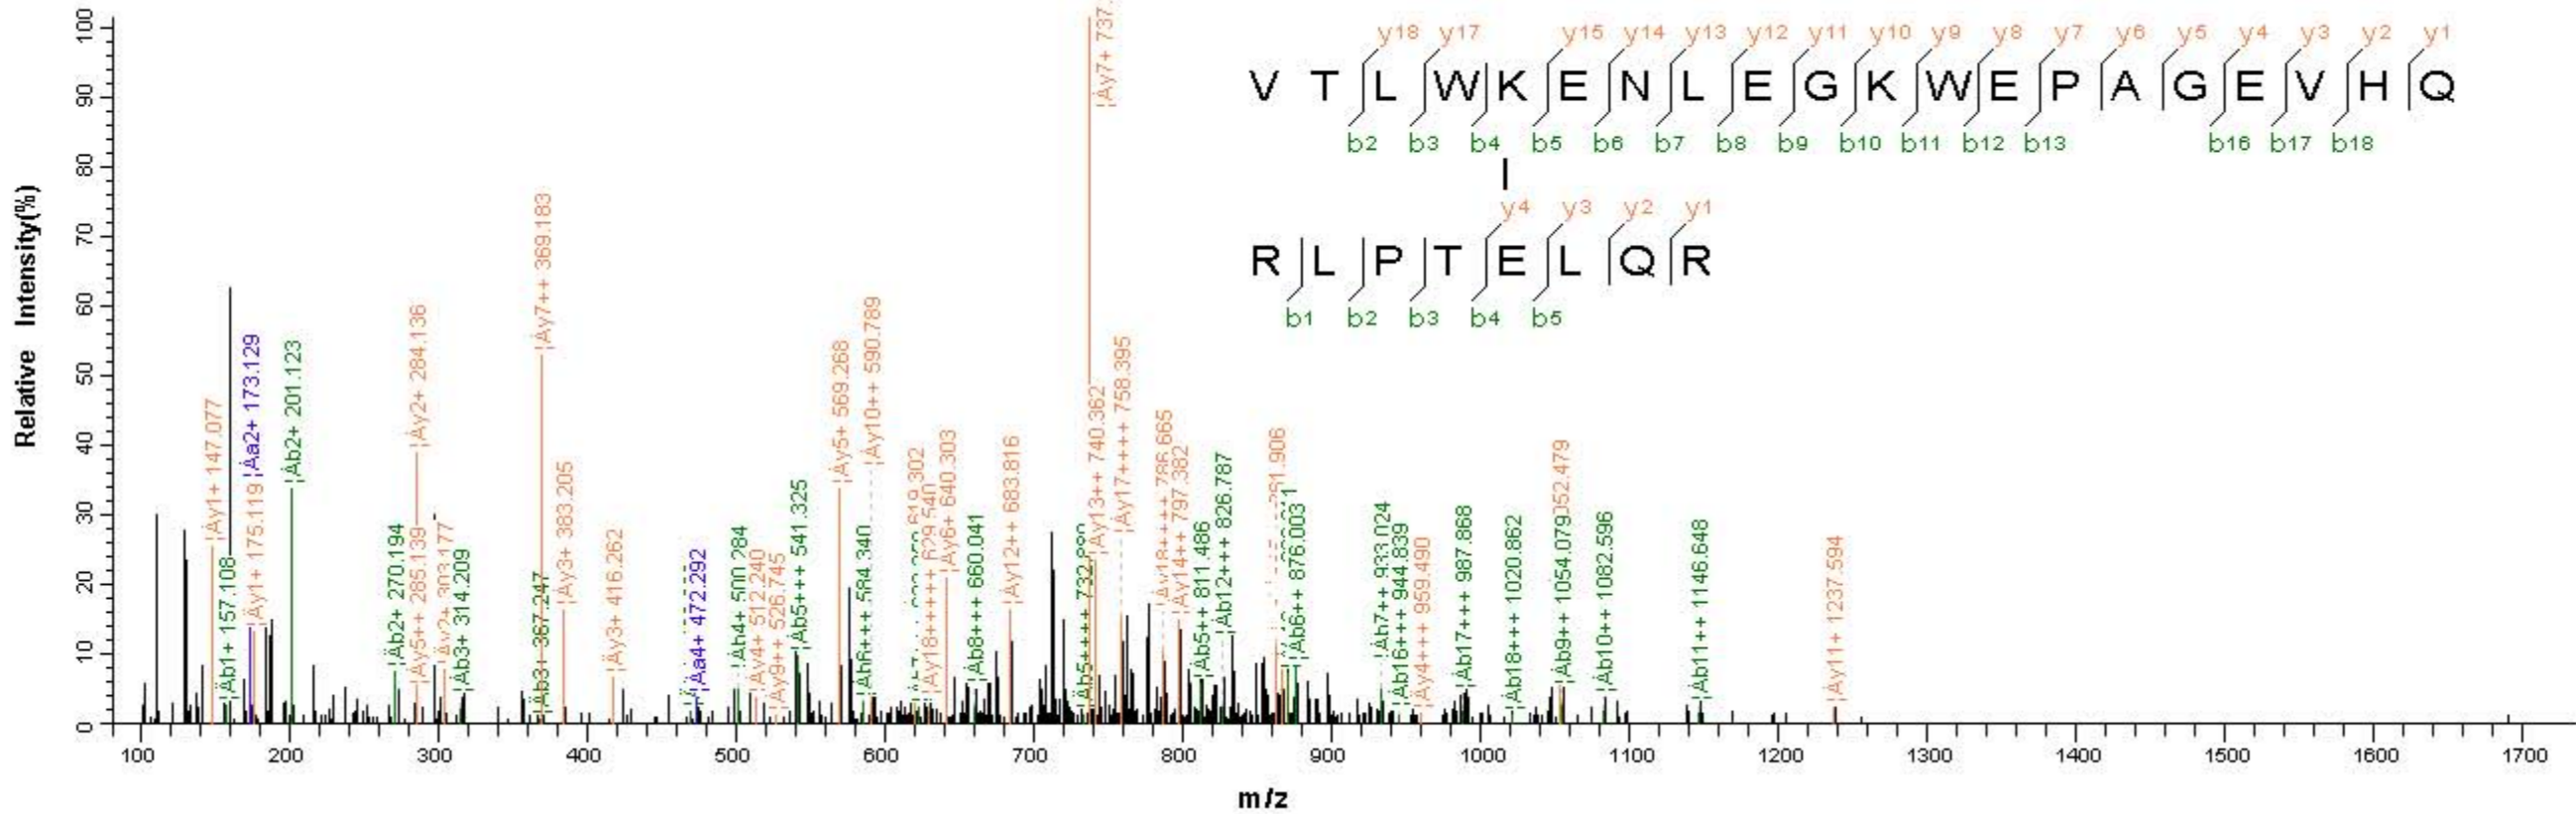

Charge: 4 MH+: 2564.2960 Score: 1.43e-006

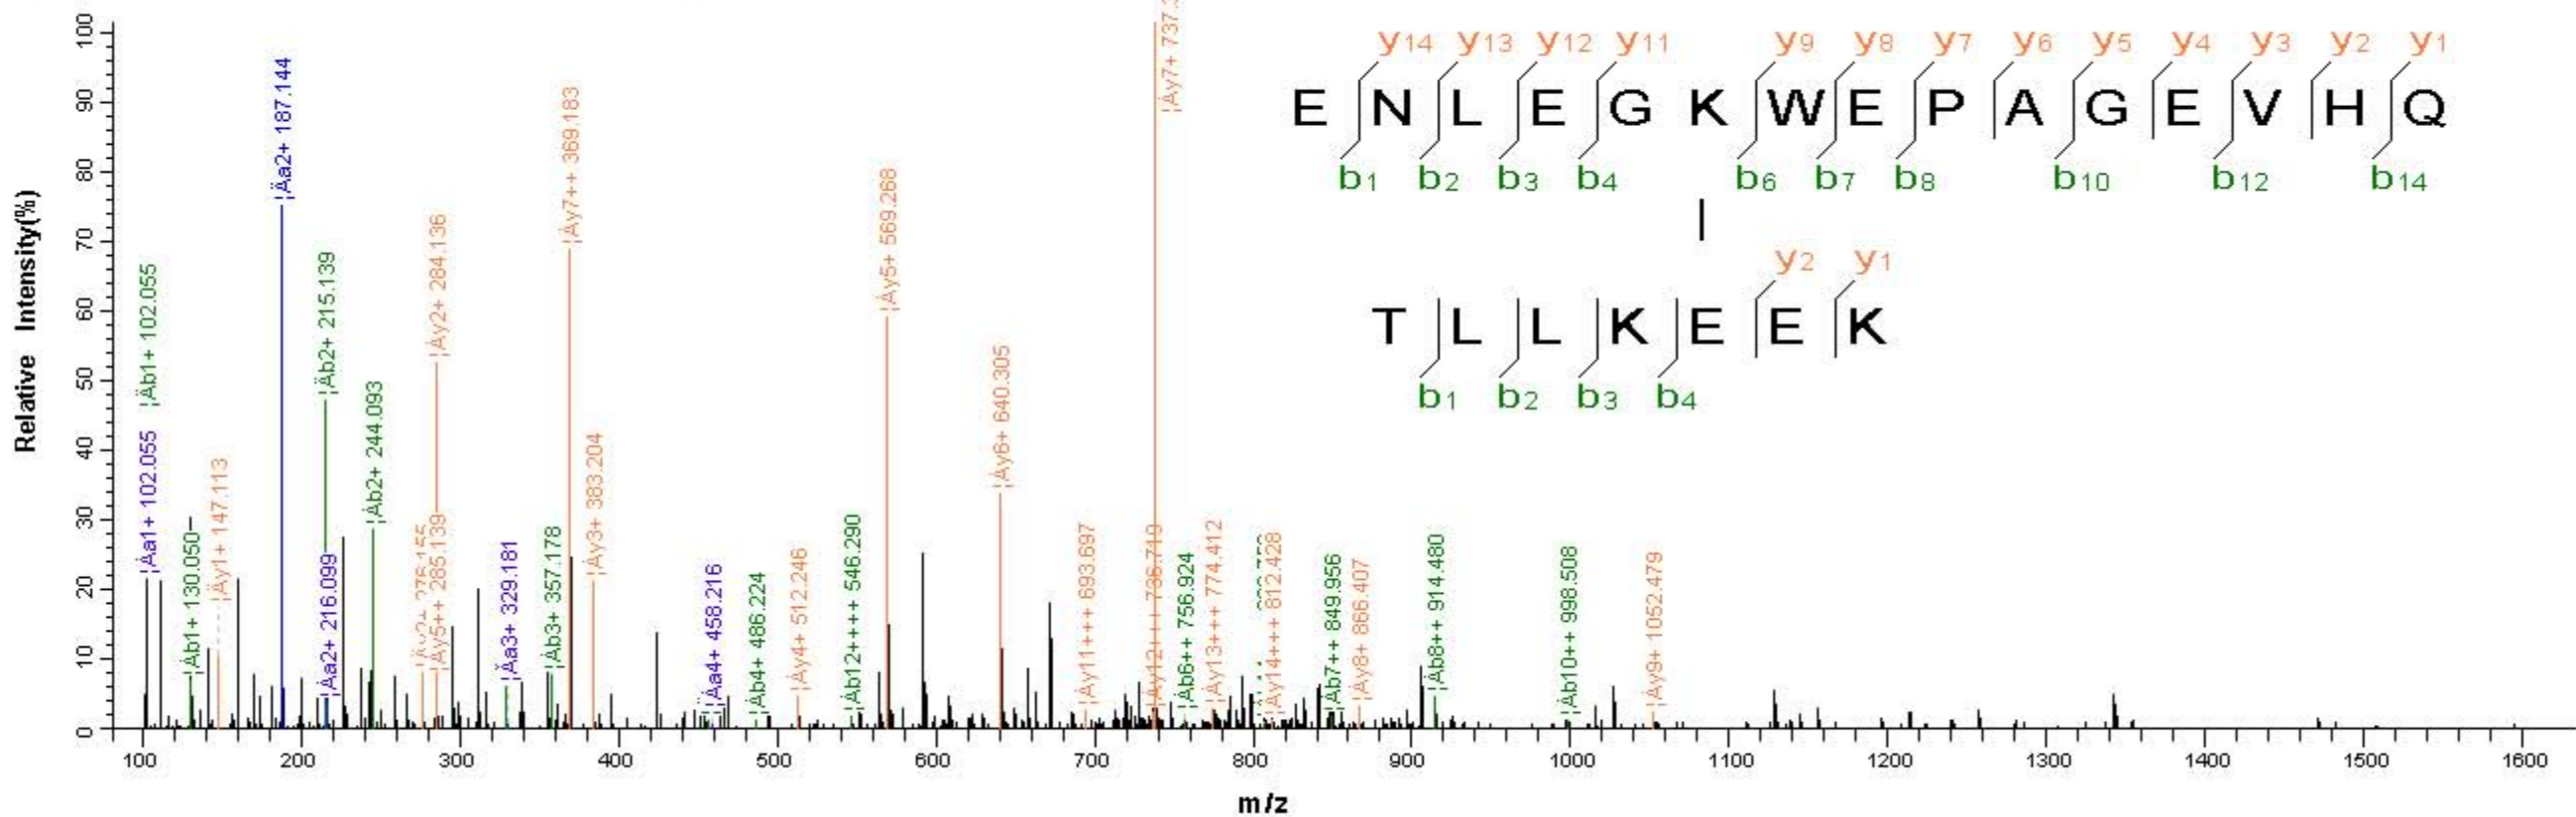

Charge: 6 MH+: 5825.9393 Score: 7.99e-009

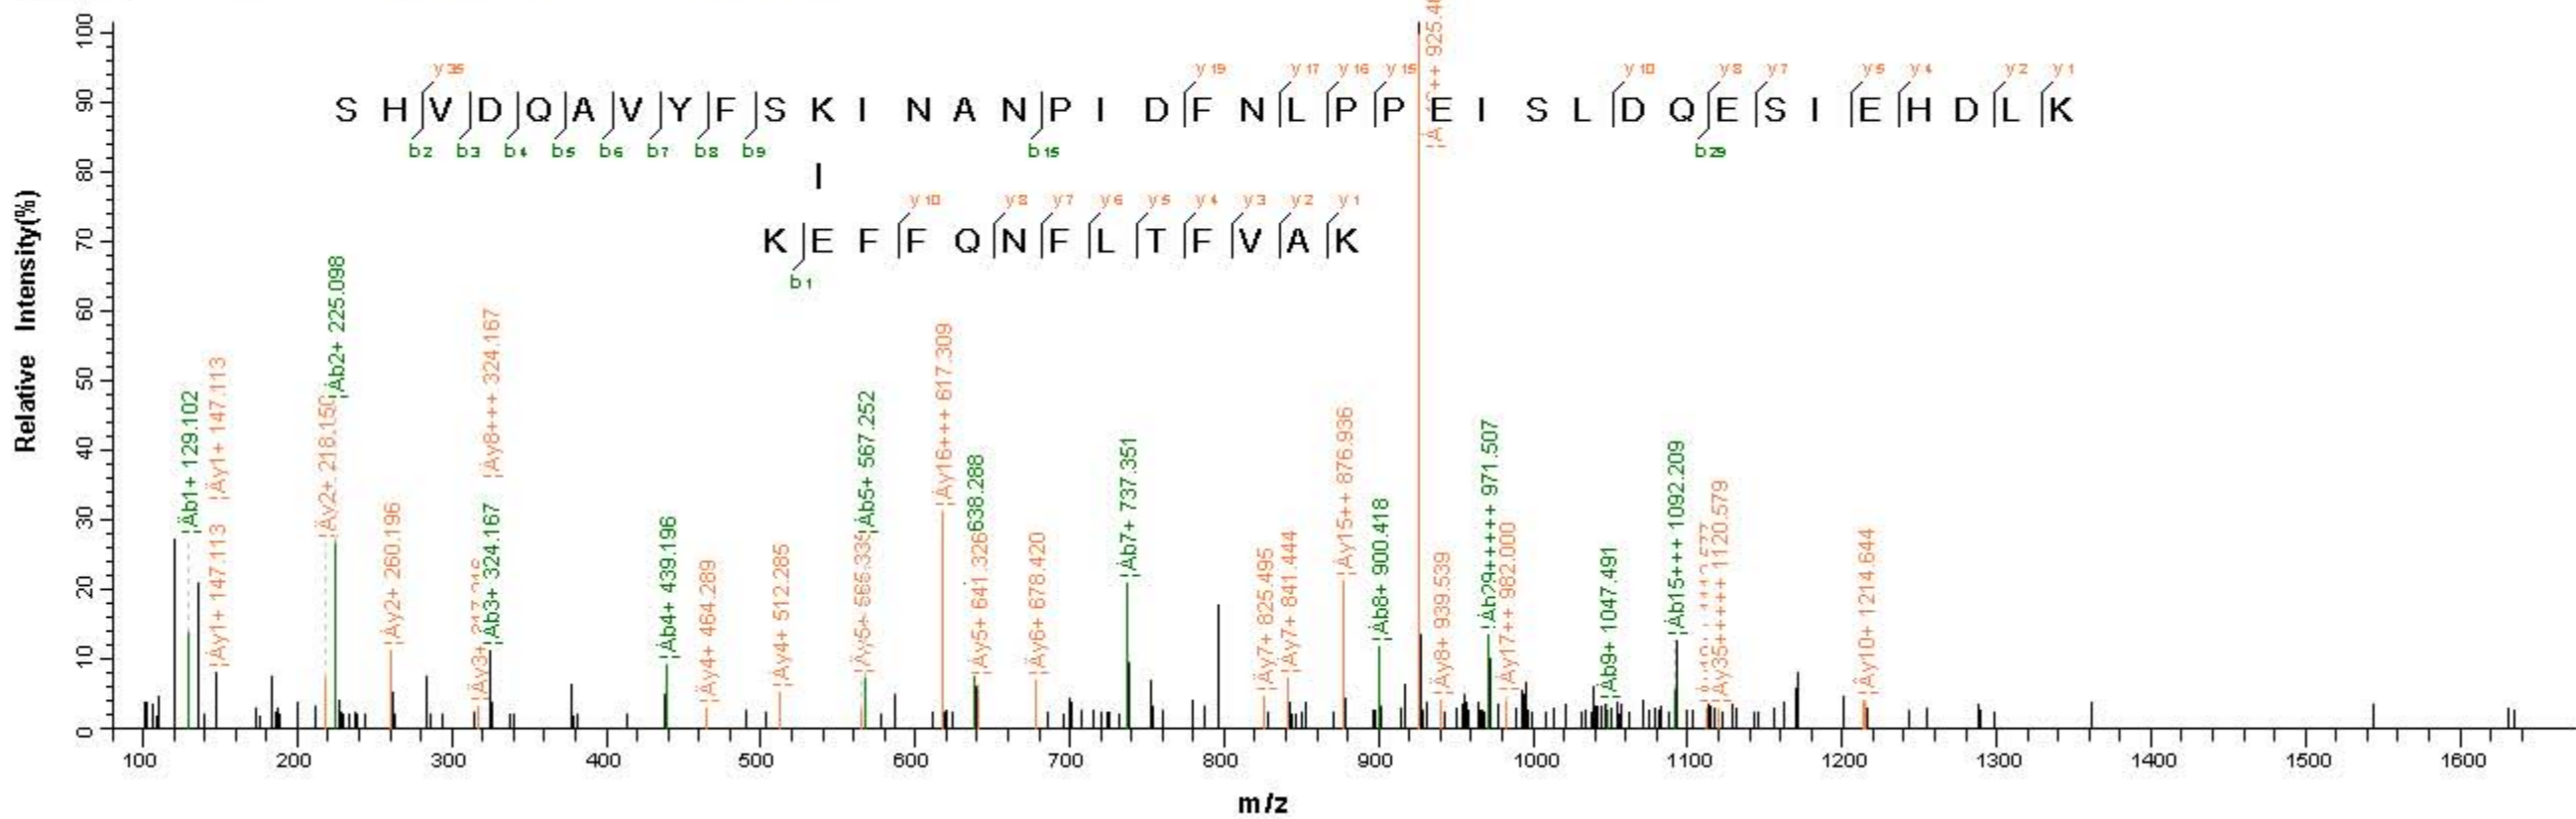

Charge: 4 MH+: 1835.9239 Score: 6.99e-008

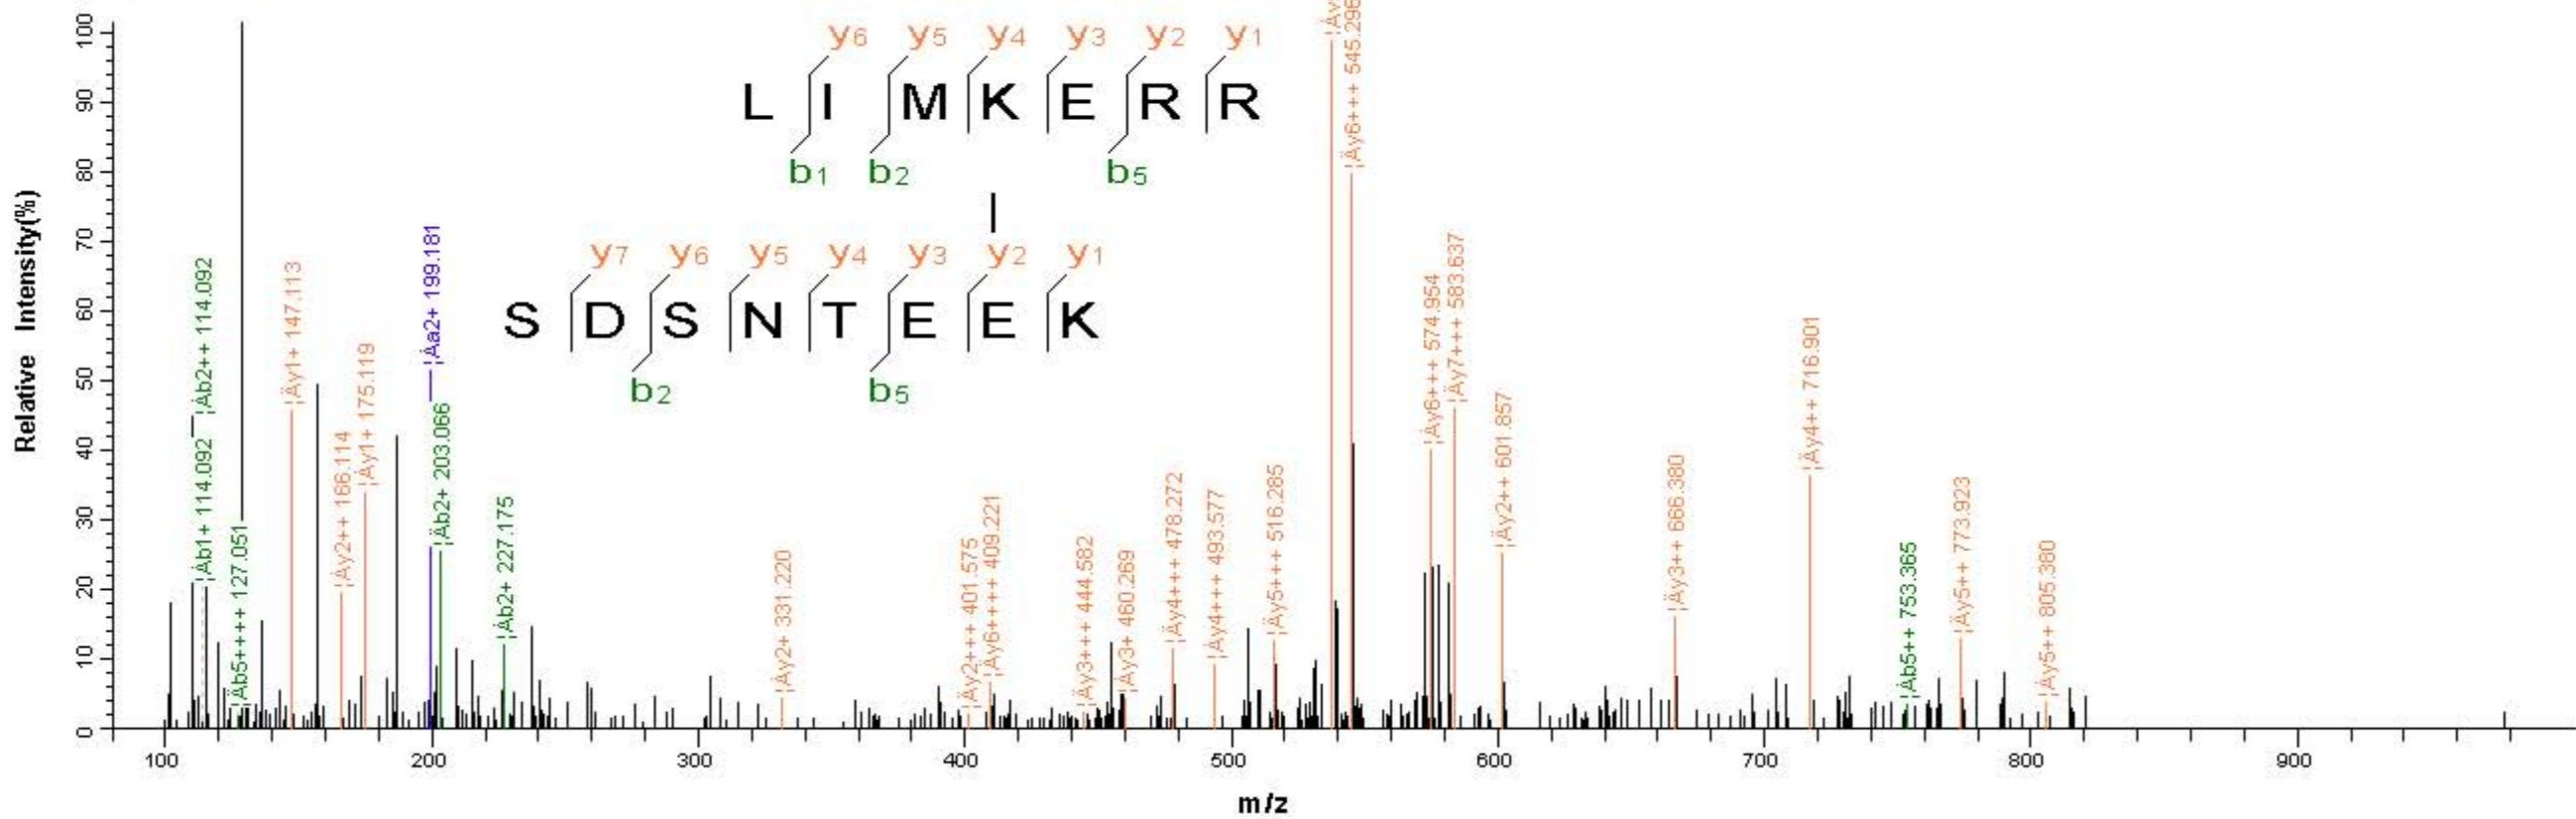



Charge: 5 MH+: 5528.7810 Score: 1.37e-006

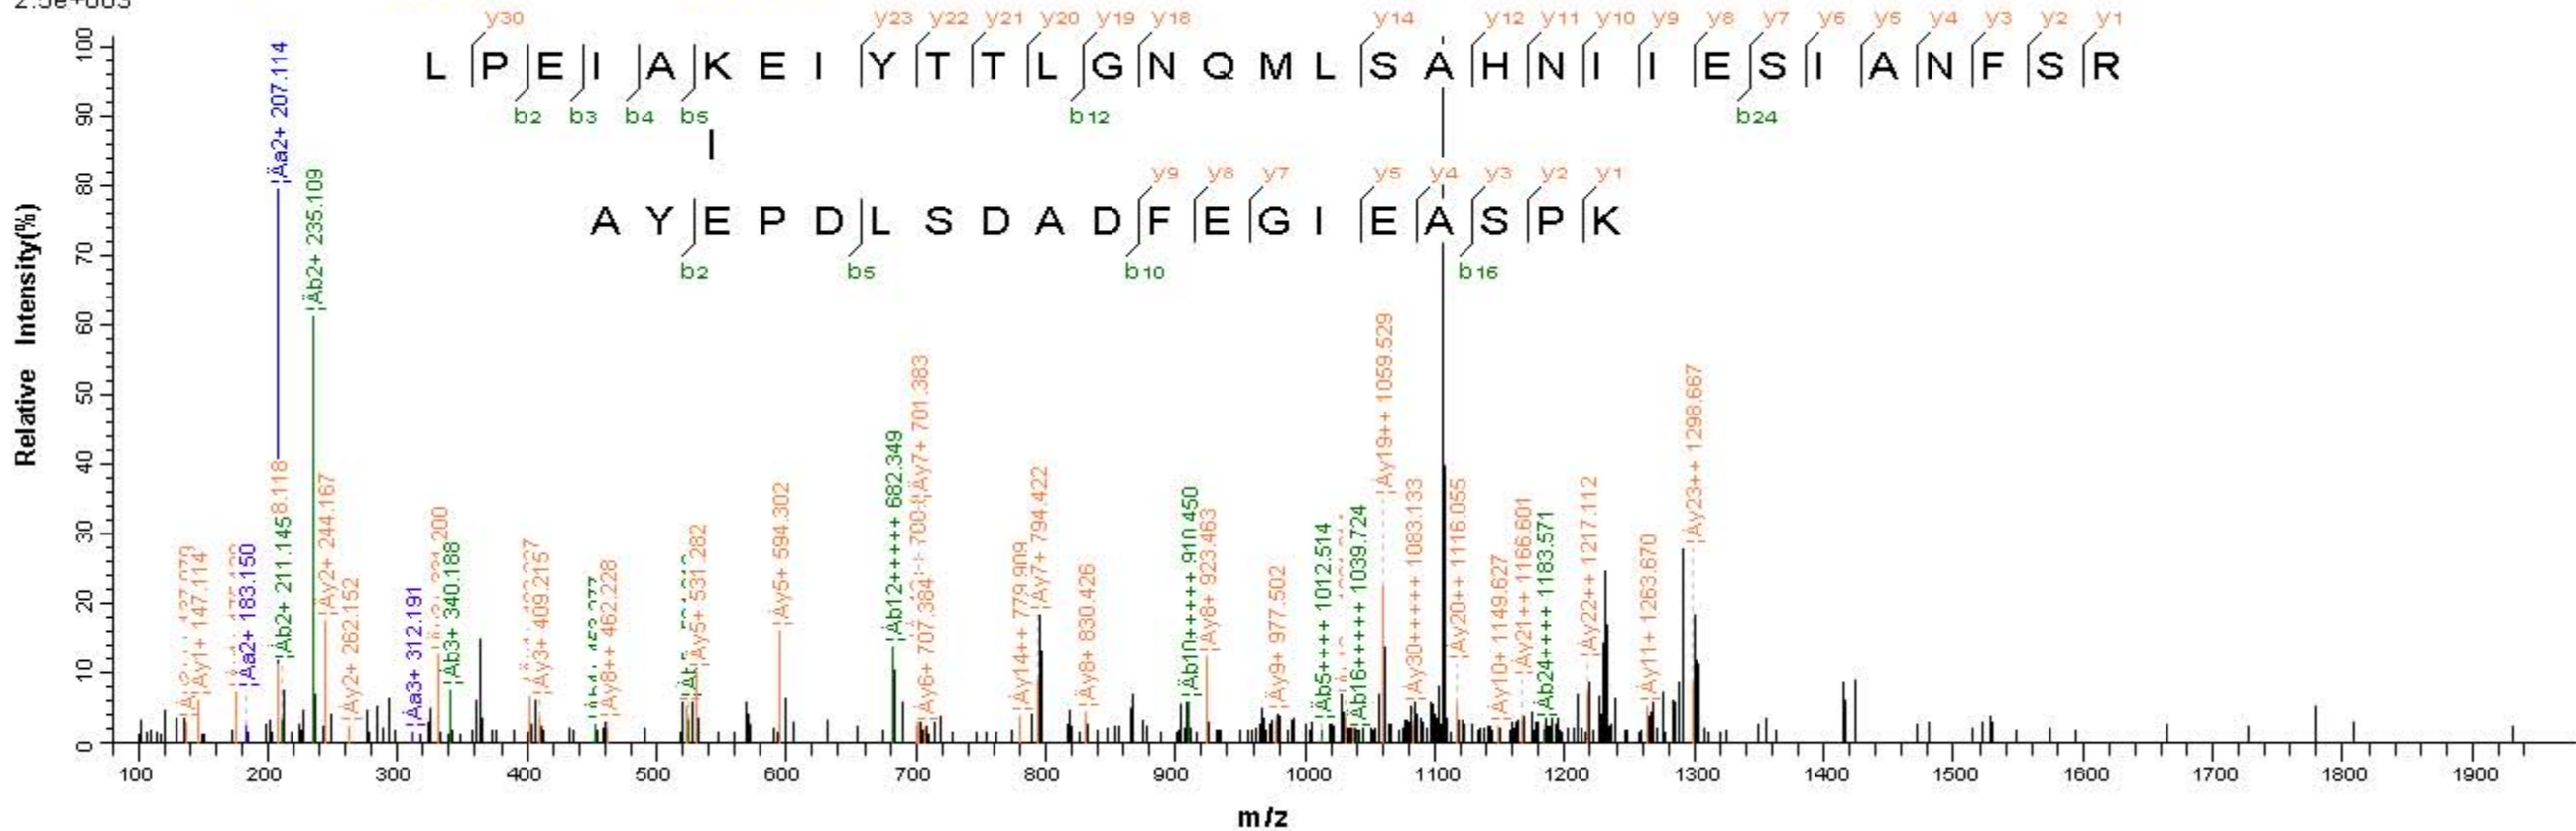

Charge: 4 MH+: 3470.7890 Score: 8.17e-004

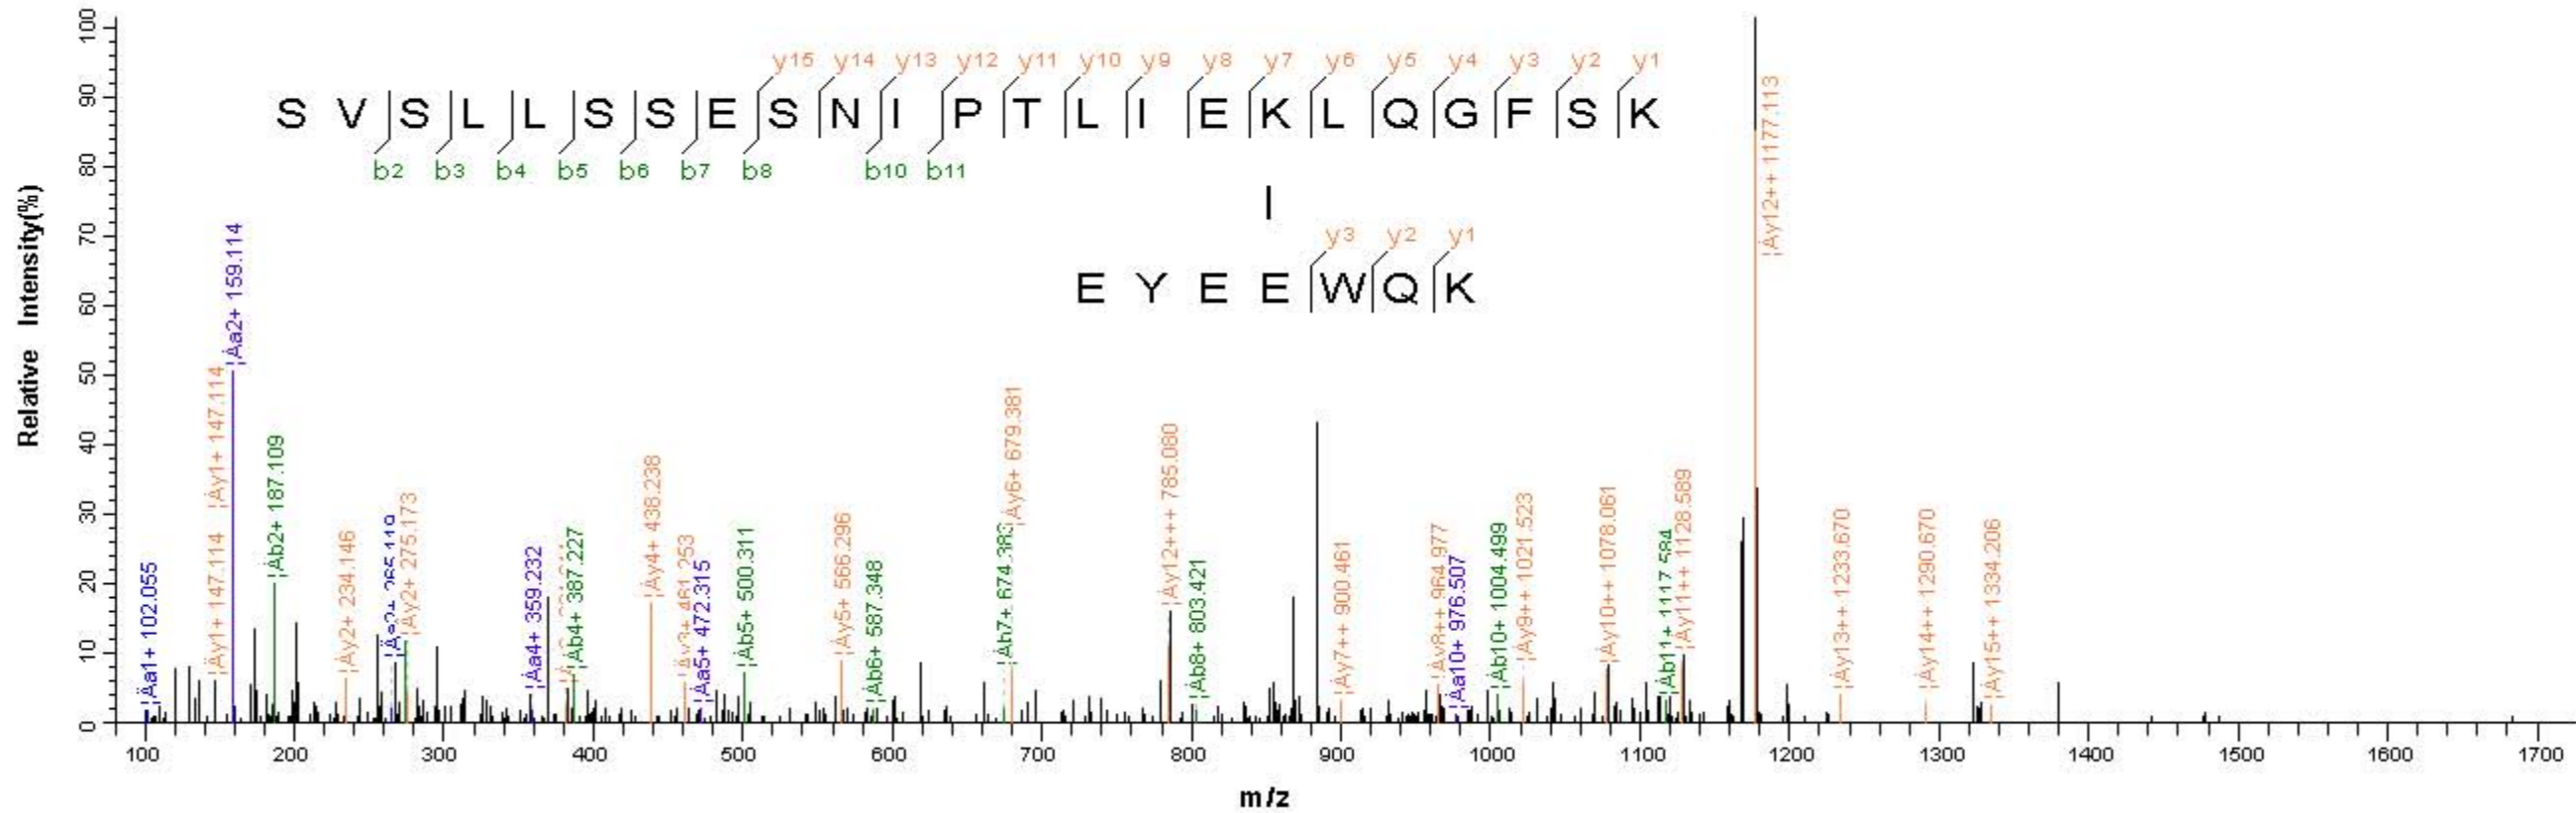

Charge: 6 MH+: 3767.0893 Score: 4.95e-004

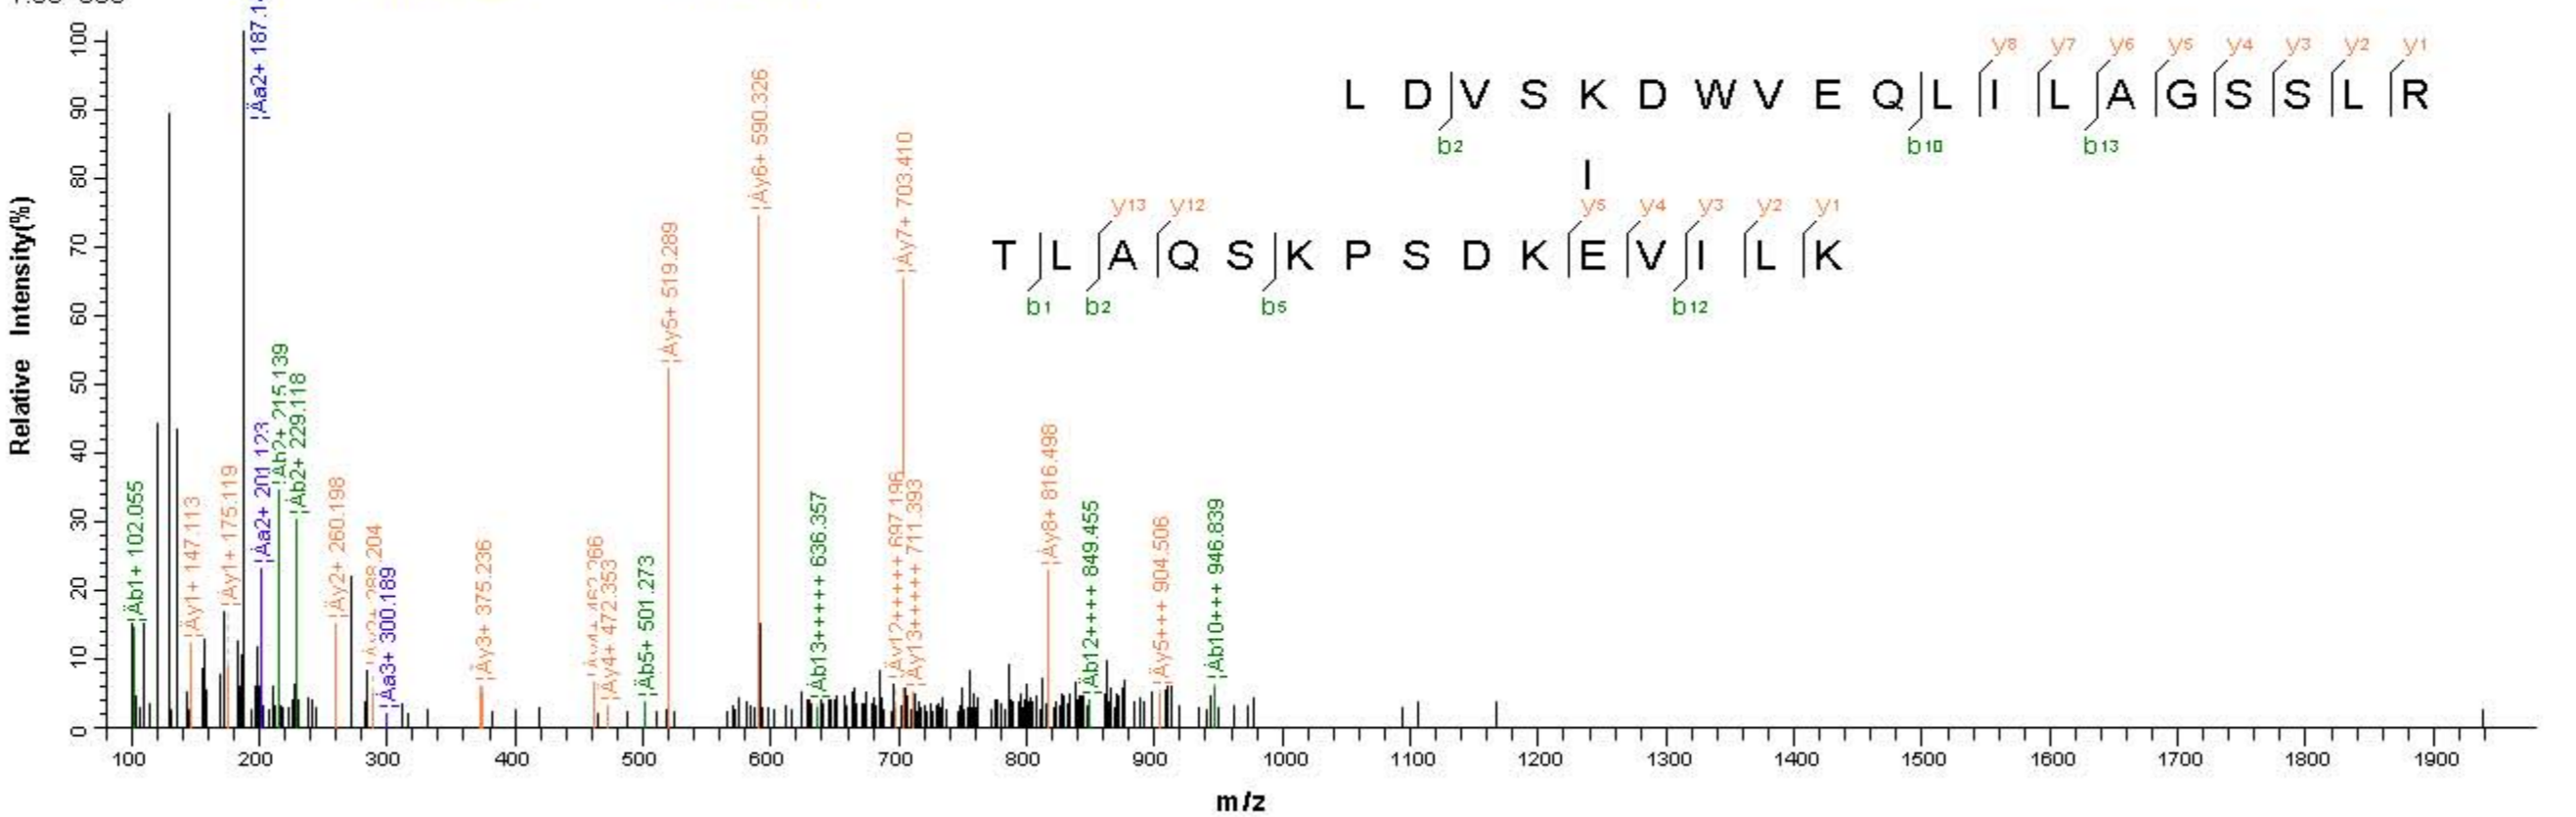

Charge: 5 MH+: 3128.6326 Score: 4.93e-002

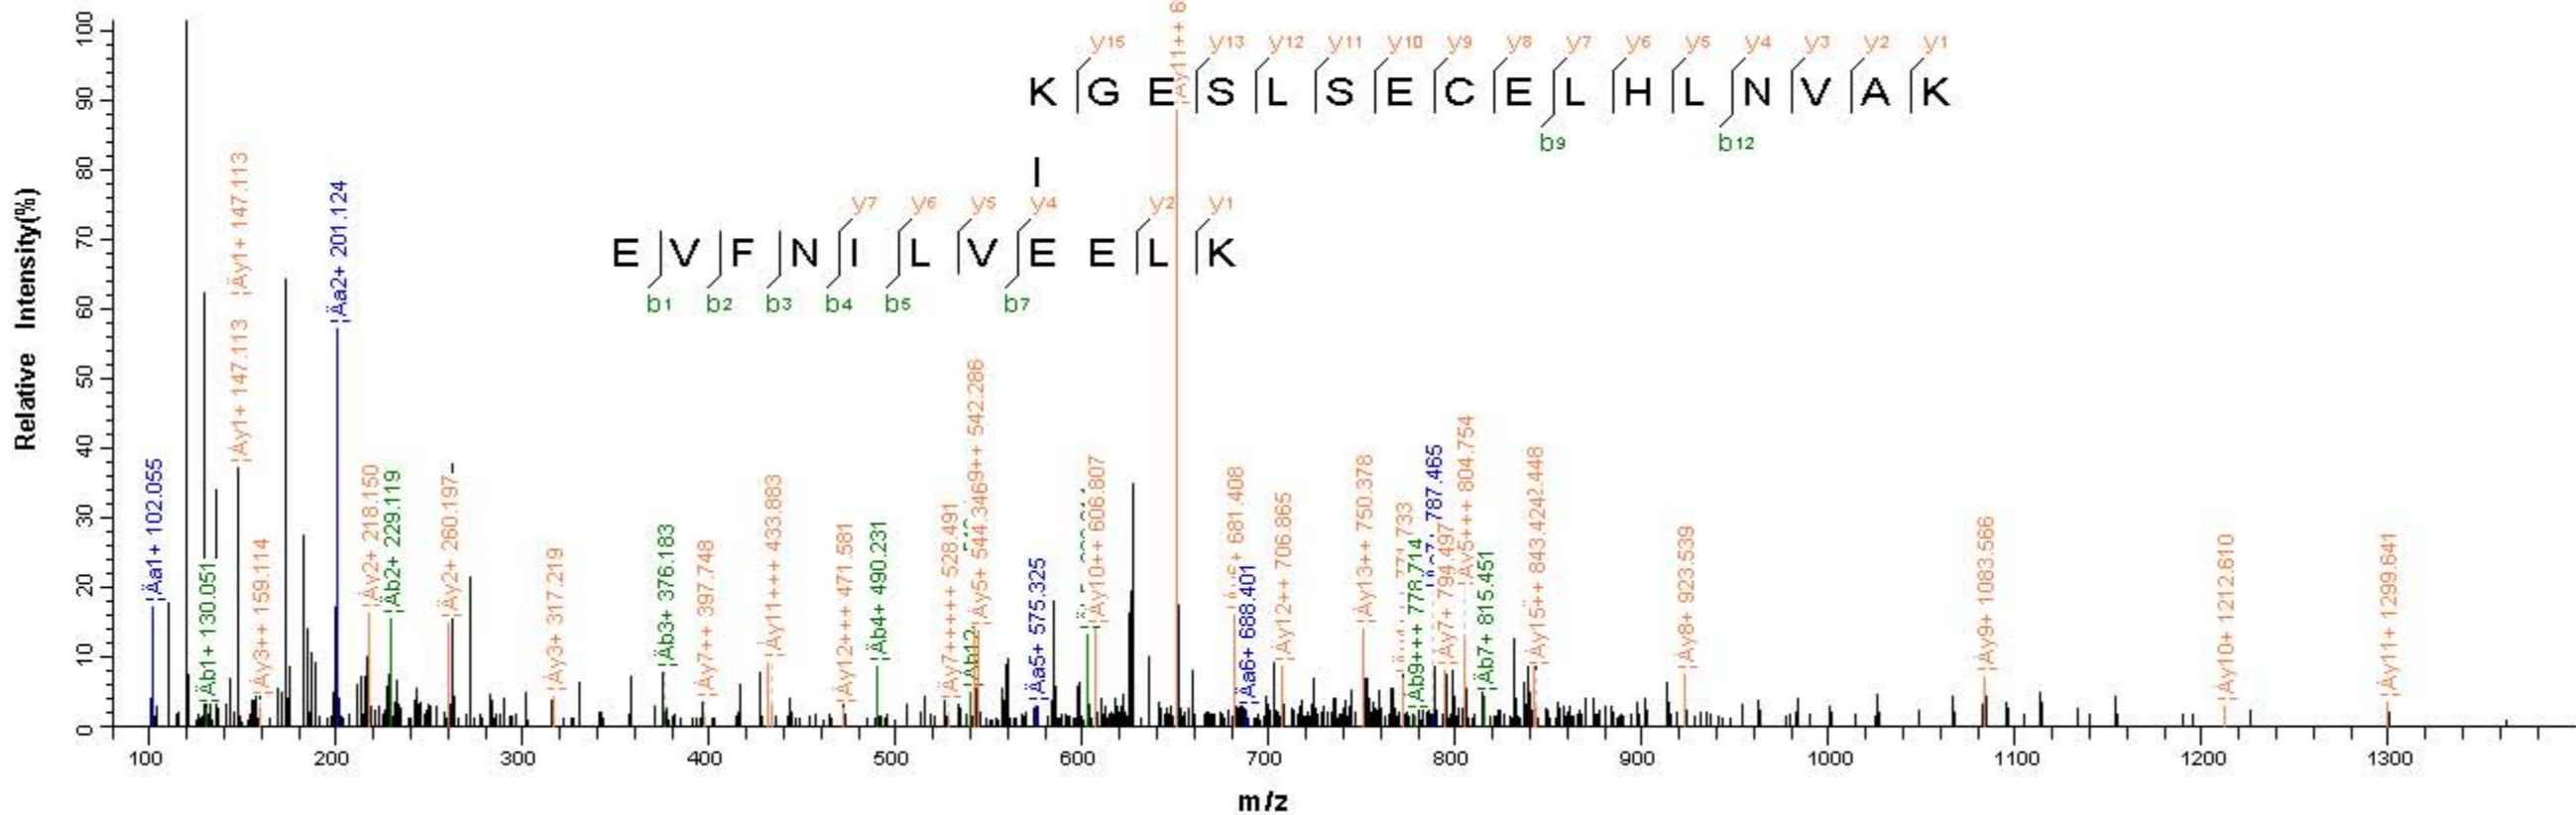

Charge: 5 MH+: 4110.0984 Score: 1.32e-004

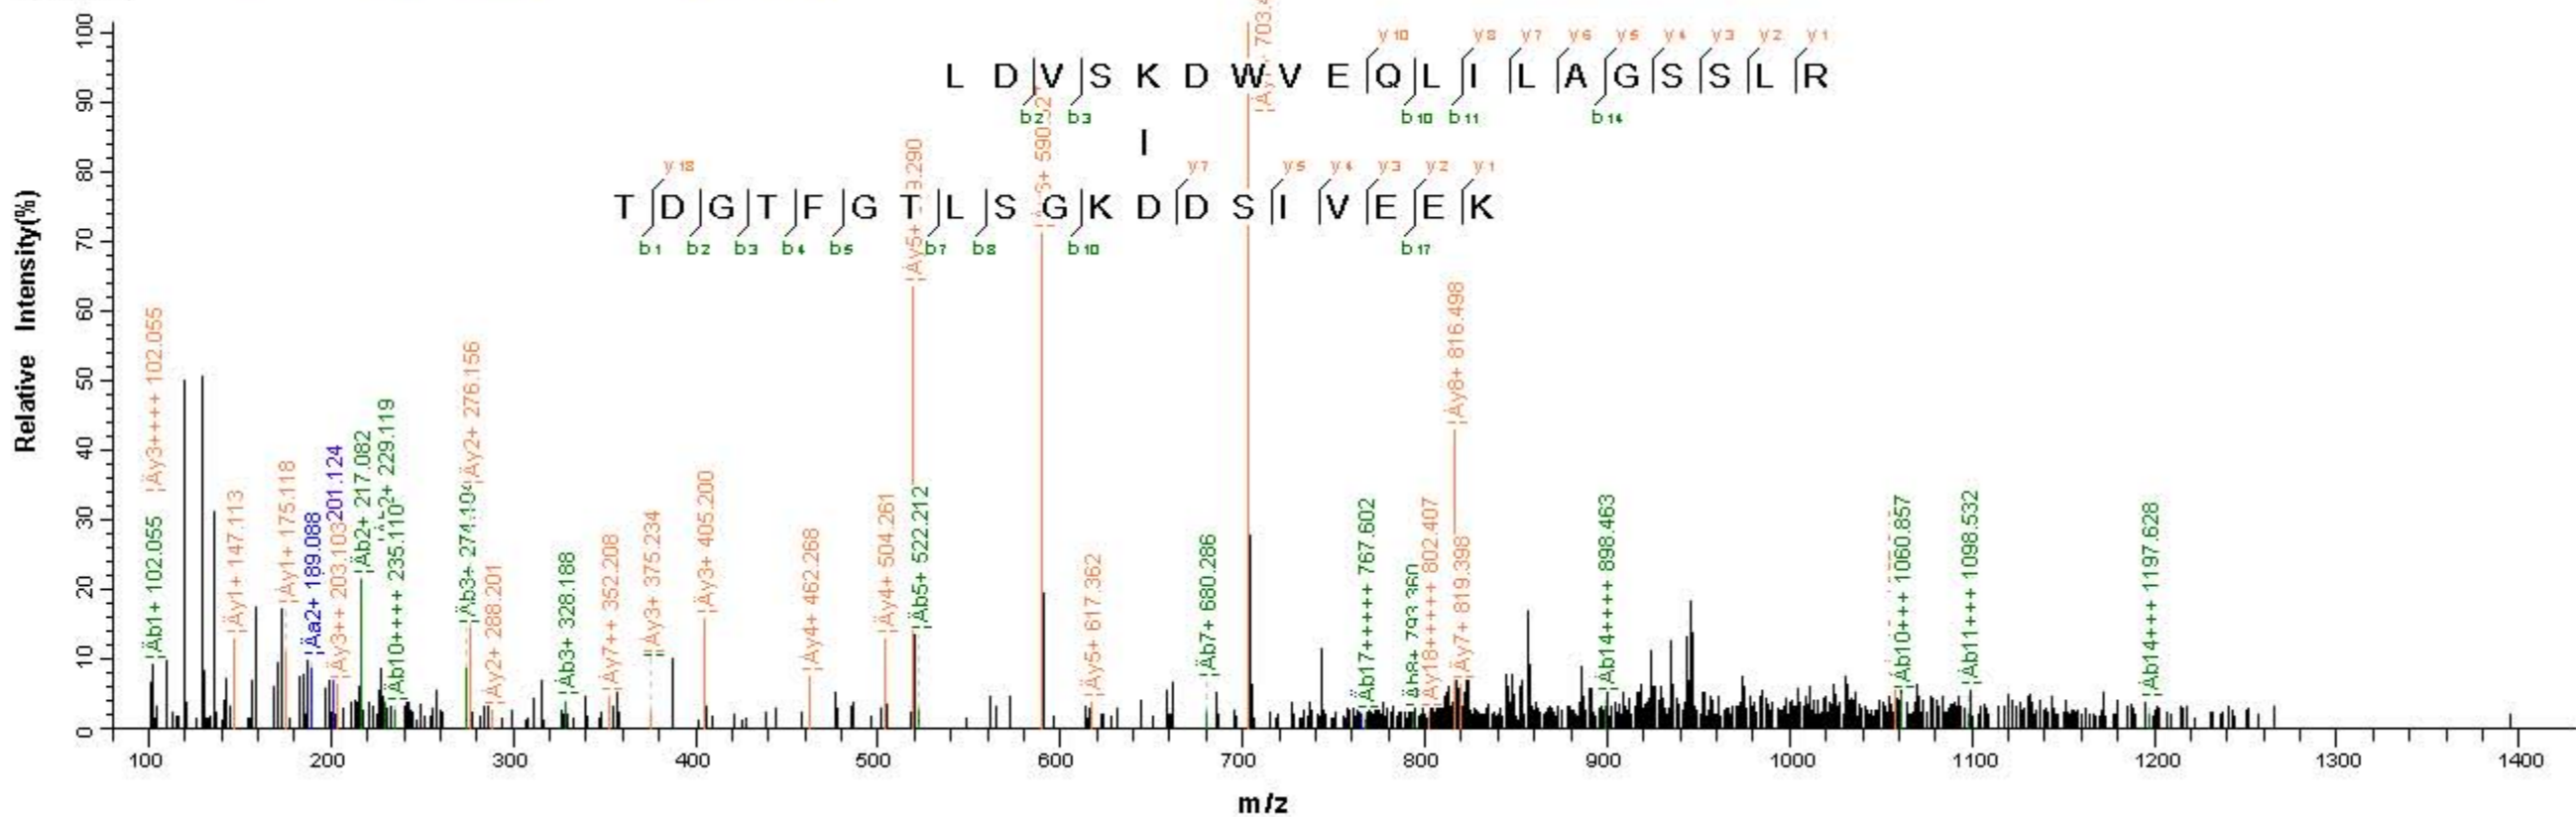

Charge: 5 MH+: 3475.8696 Score: 4.62e-007

L S S L L V E K D N L D I N T L R  
g<sub>2</sub> b<sub>4</sub> b<sub>5</sub> b<sub>2</sub> y<sub>r</sub> y<sub>a</sub> y<sub>3</sub> y<sub>4</sub> y<sub>5</sub> y<sub>2</sub> y<sub>1</sub>  
K I Q Y N L D T I D A E K  
g<sub>1</sub> y<sub>a</sub> y<sub>3</sub> y<sub>4</sub> y<sub>5</sub> y<sub>2</sub> y<sub>1</sub>

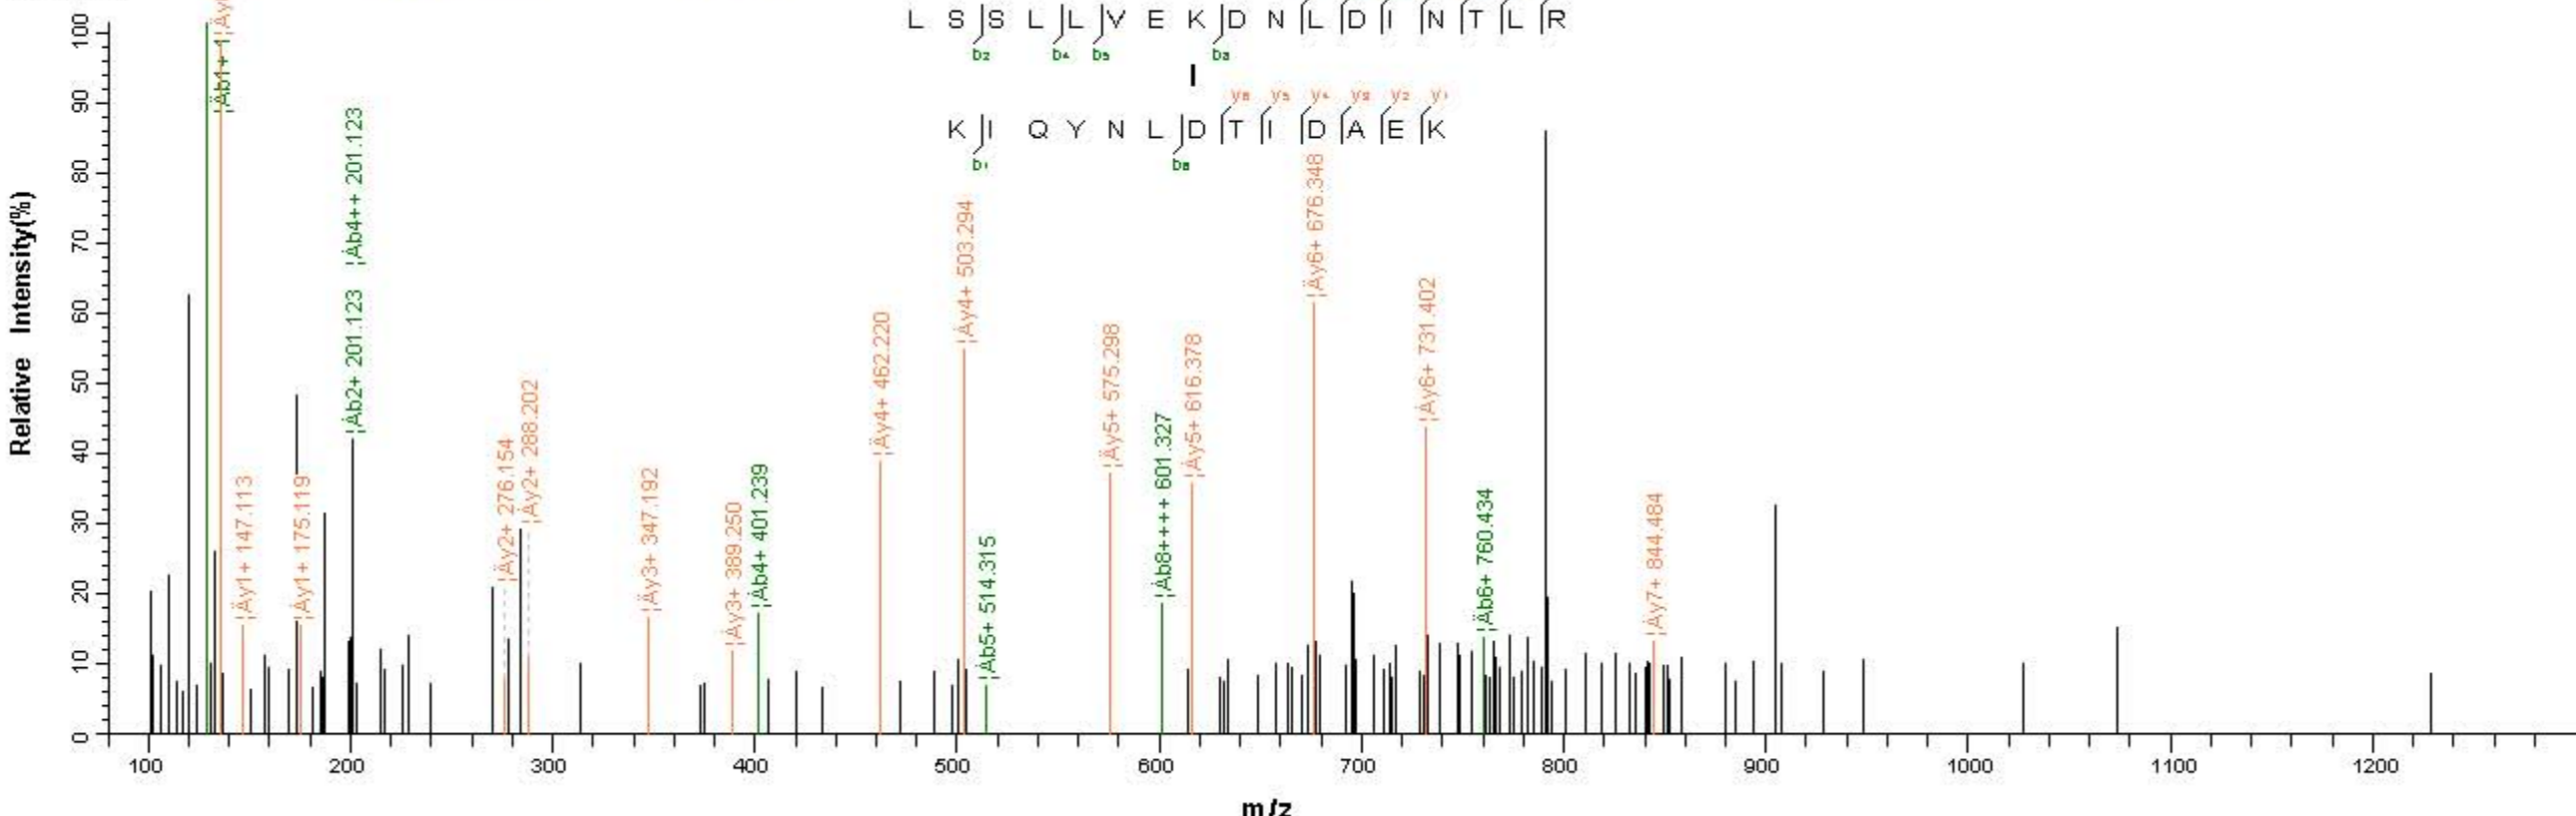

charge: 7 MH+: 4686.3579 Score: 3.36e-007

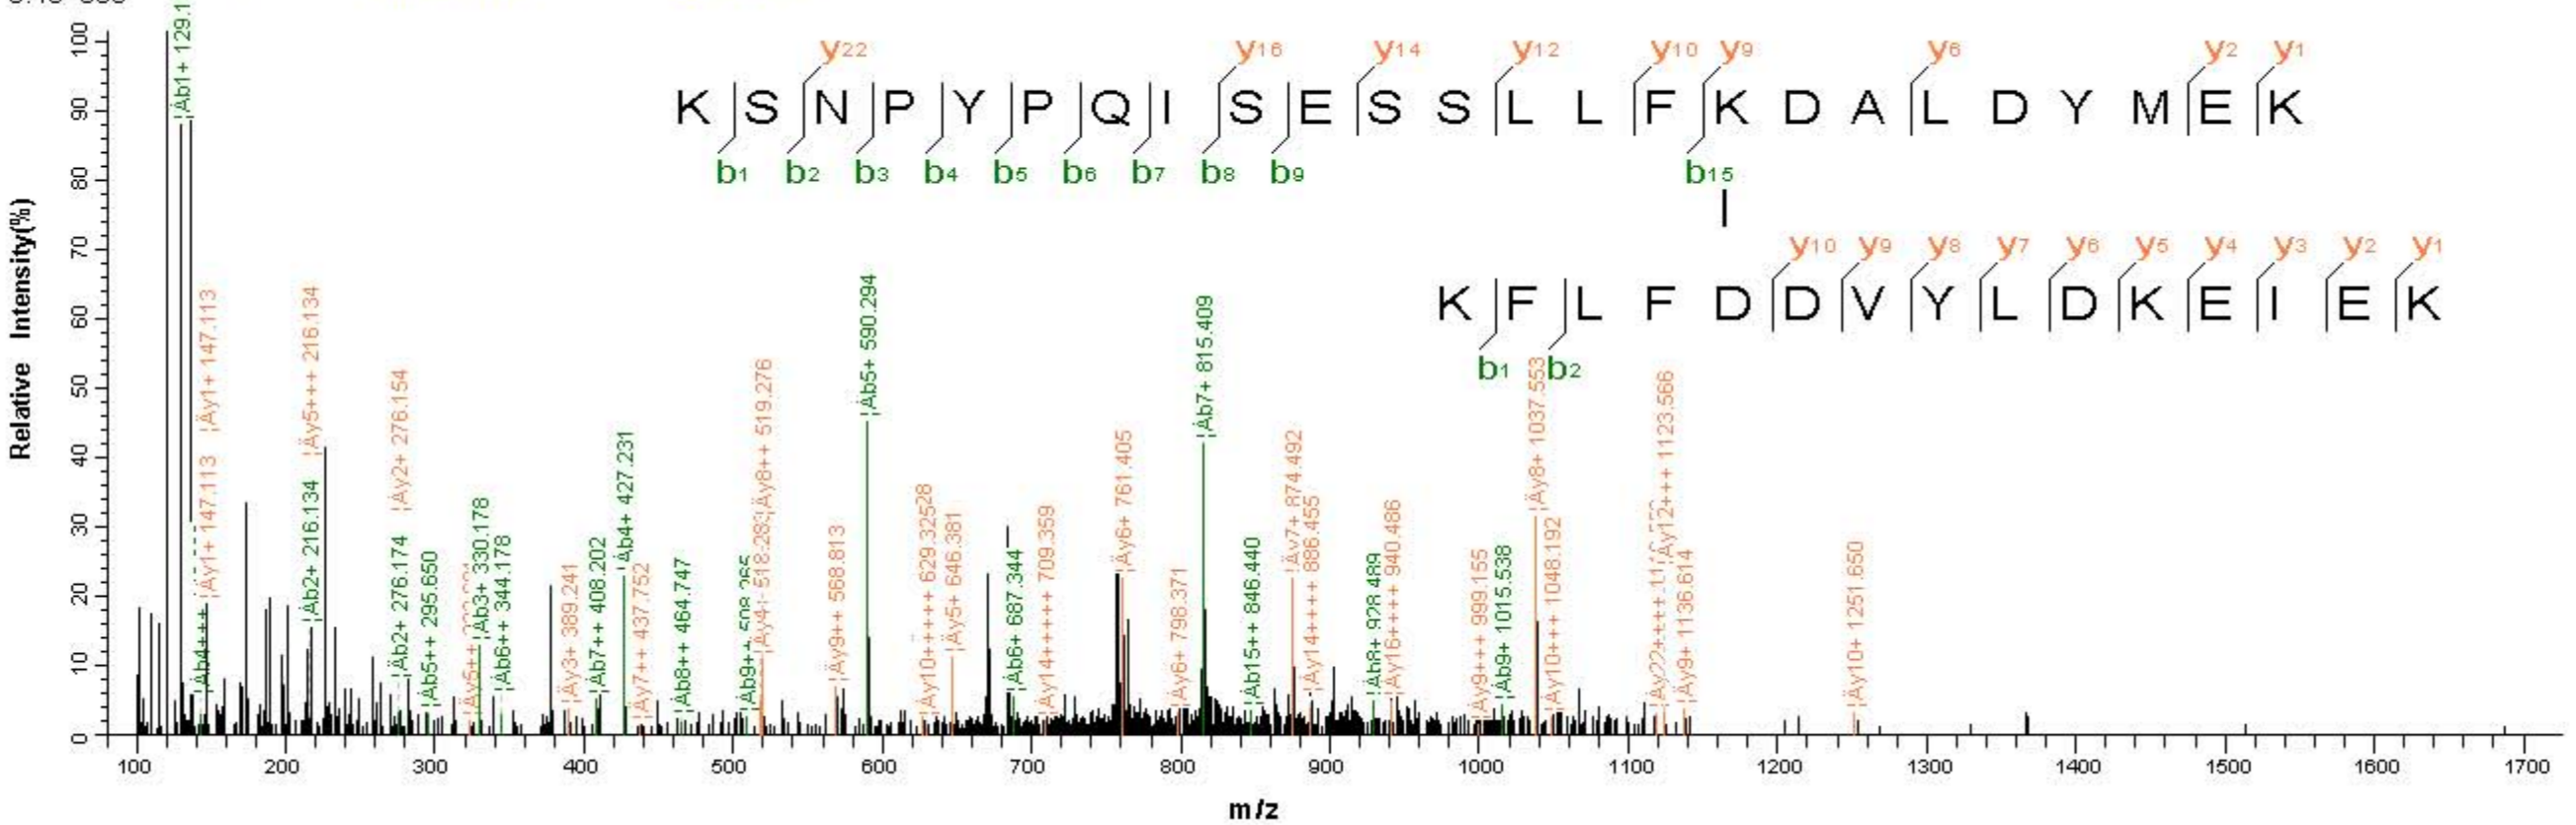

Charge: 6    MH+: 3933.0631    Score: 4.18e-006

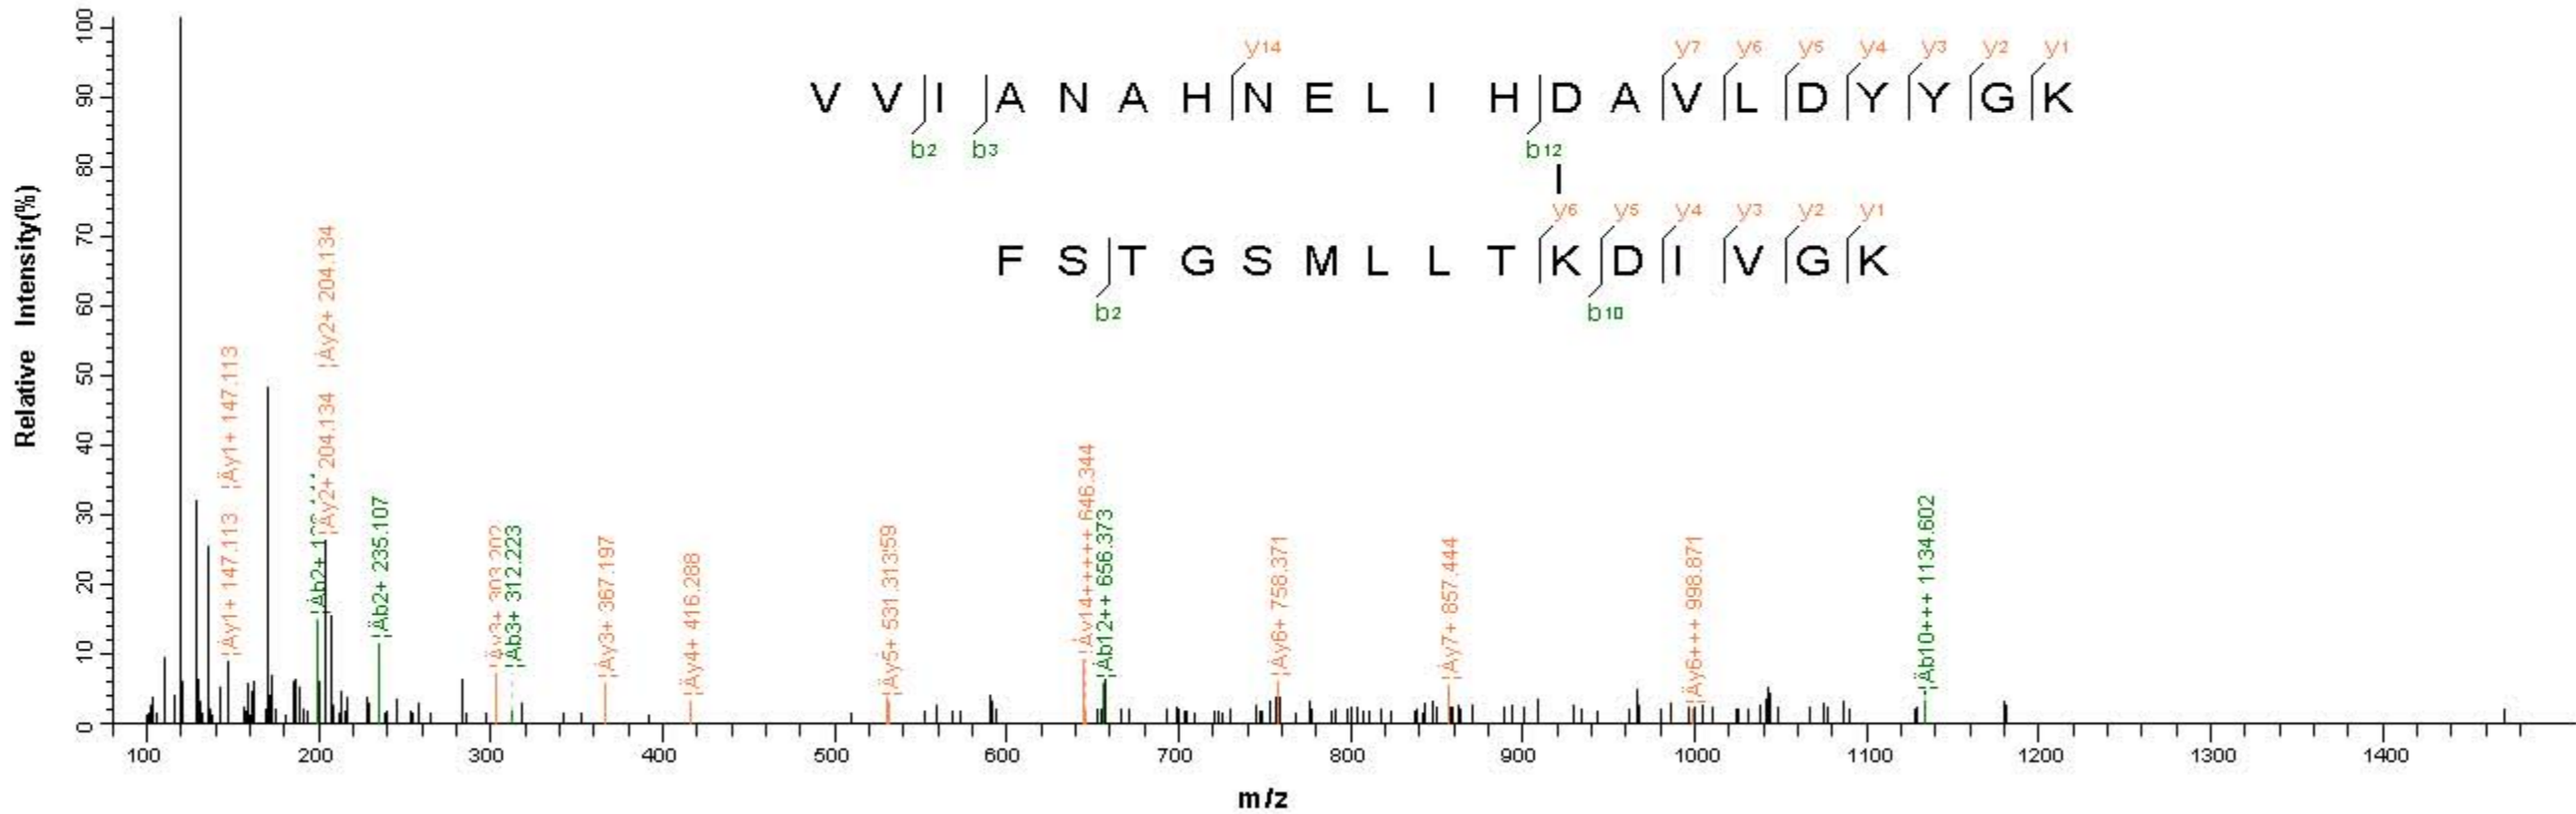



Charge: 4 MH+: 2089.2238 Score: 7.54e-006

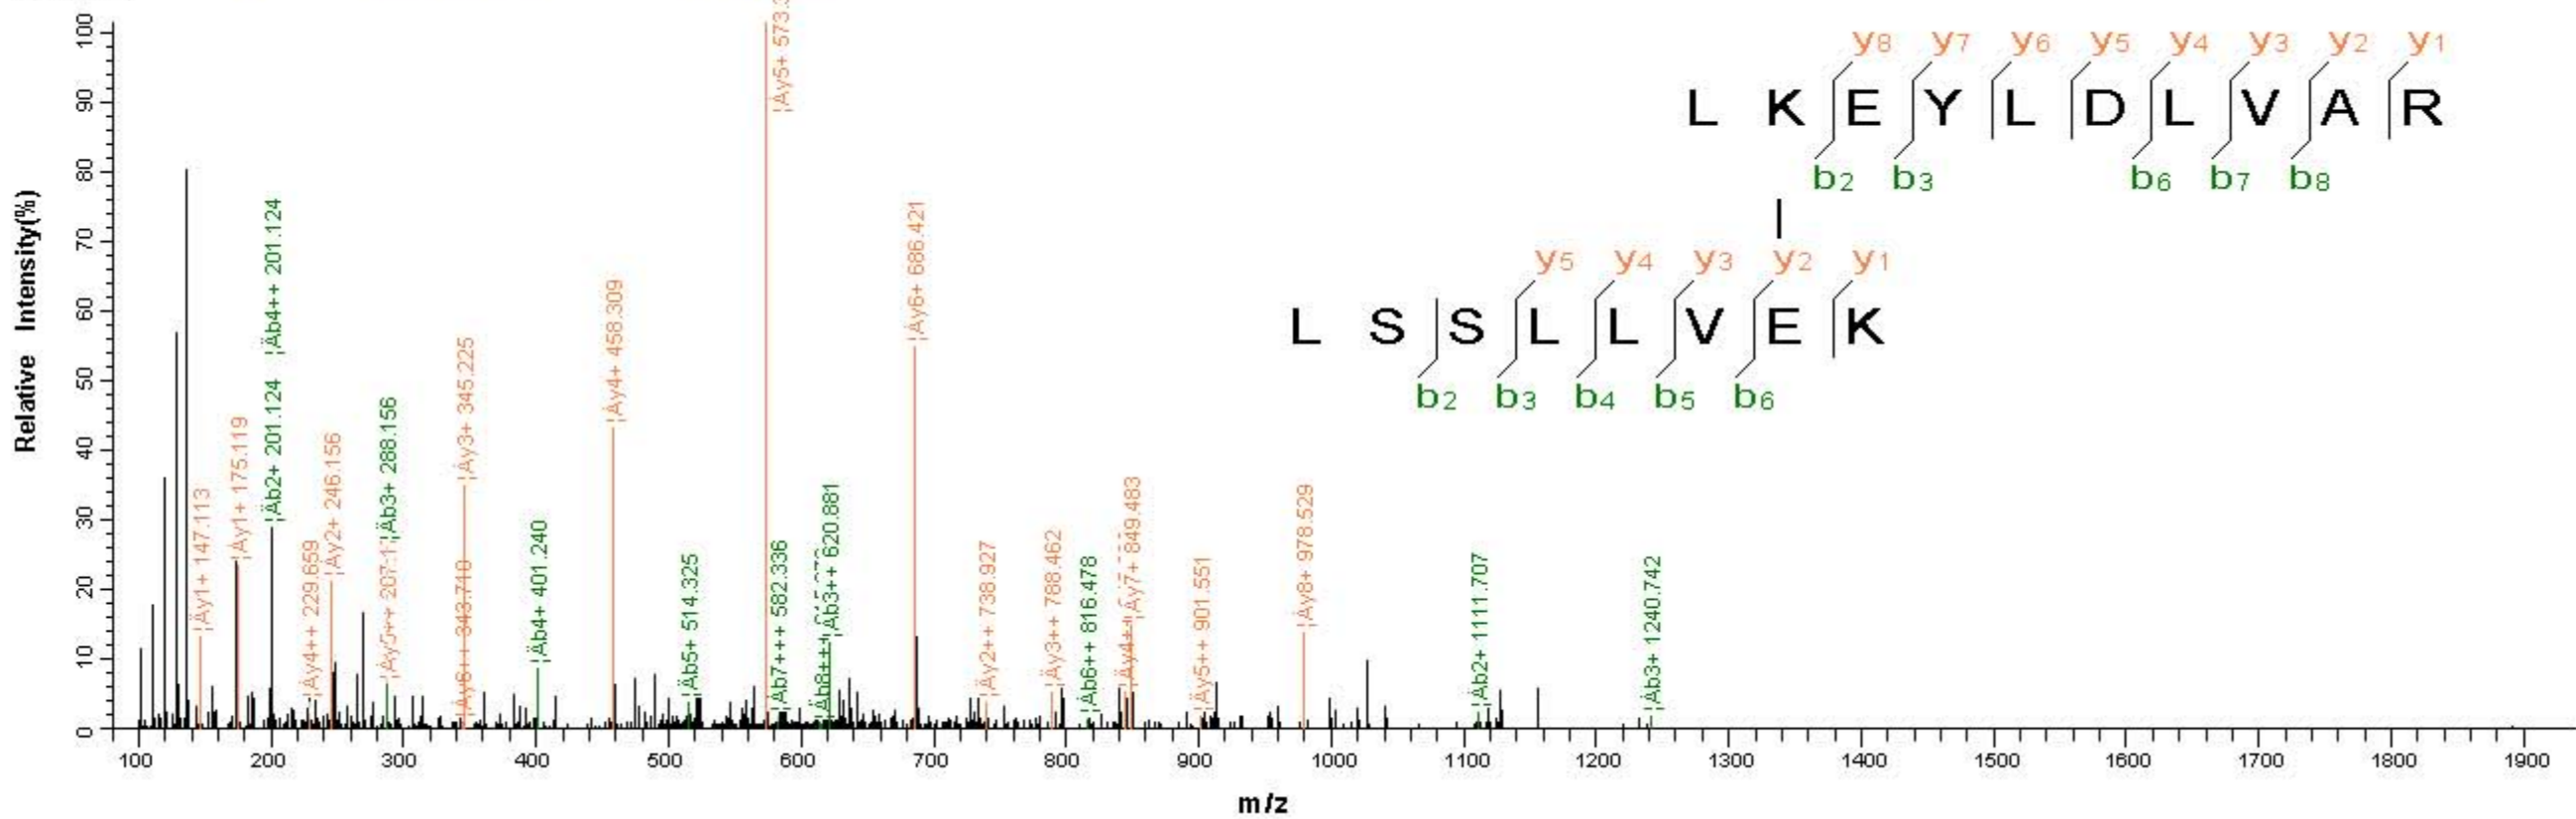

Charge: 4 MH+: 3618.6635 Score: 3.95e-005

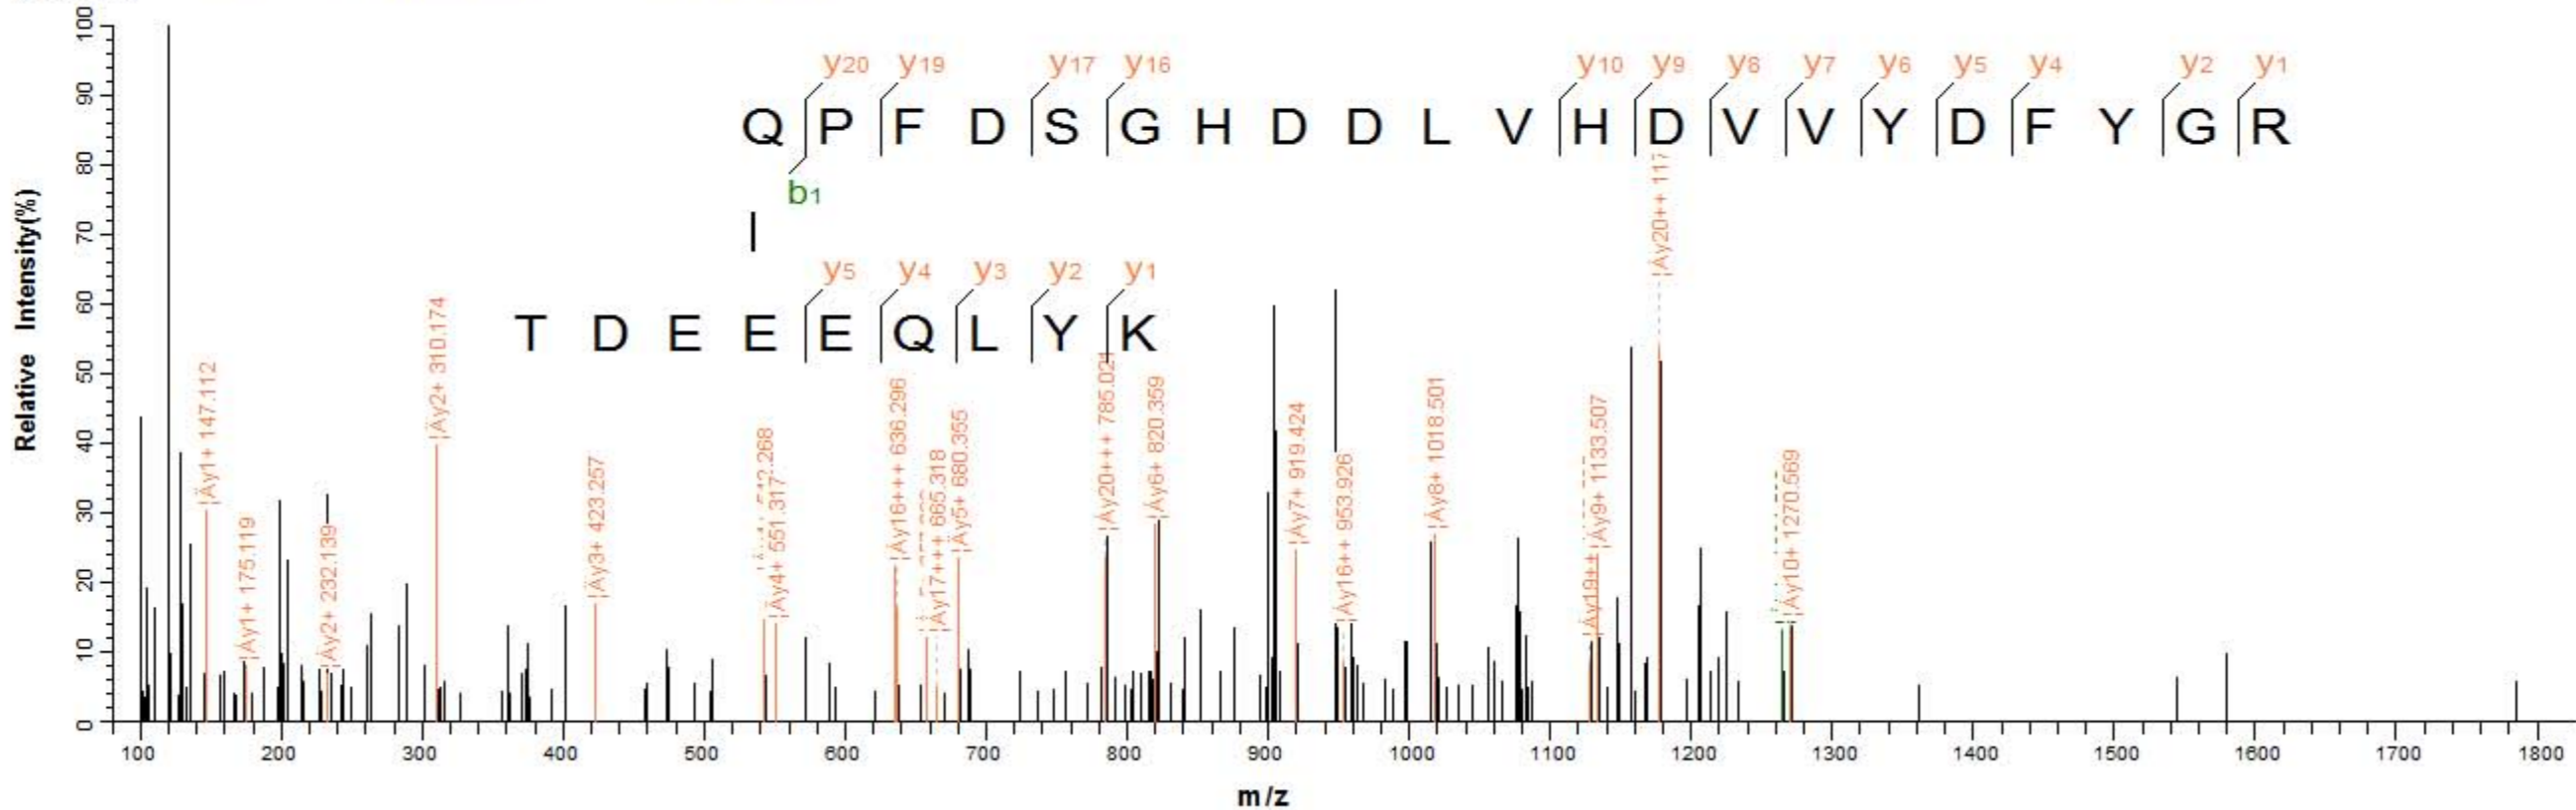

Charge: 5 MH+: 3626.8446 Score: 8.26e-012

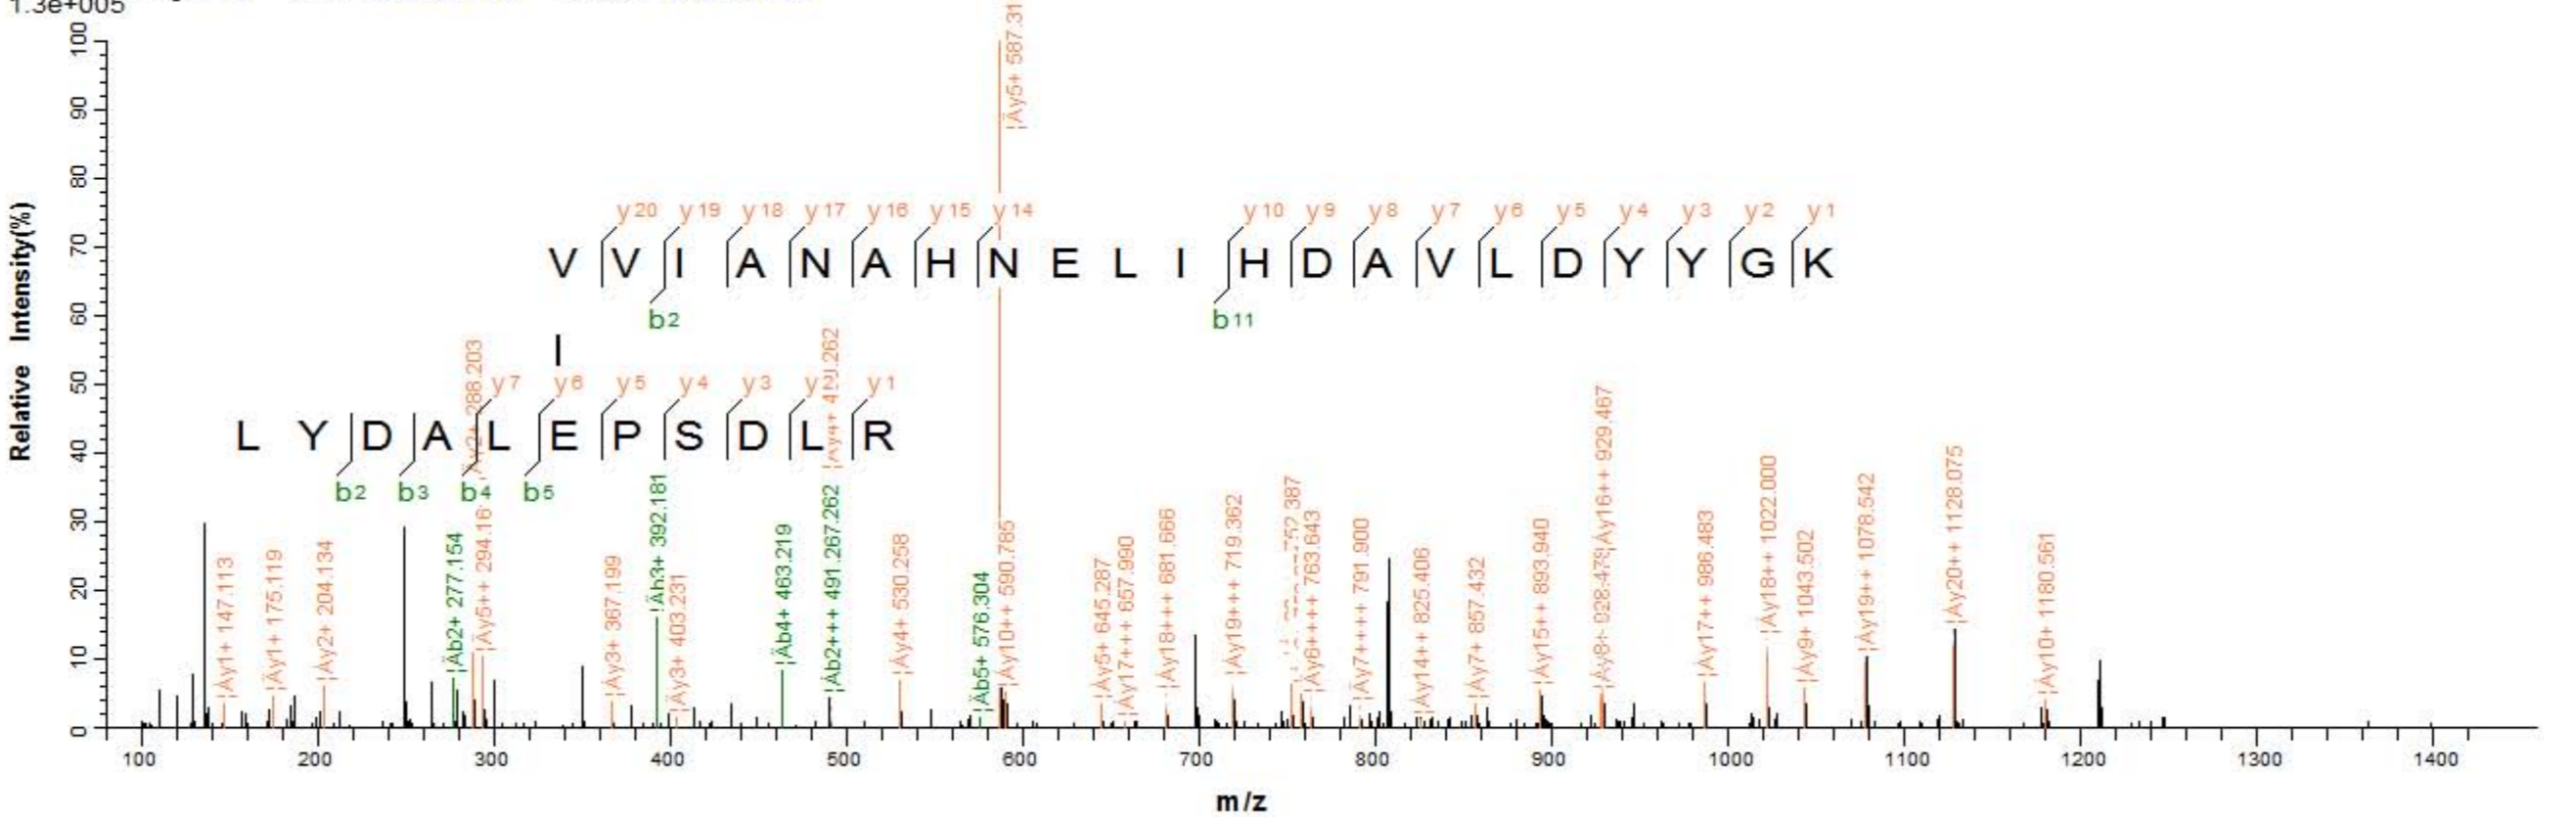

Charge: 4 MH+: 4120.0812 Score: 5.47e-010

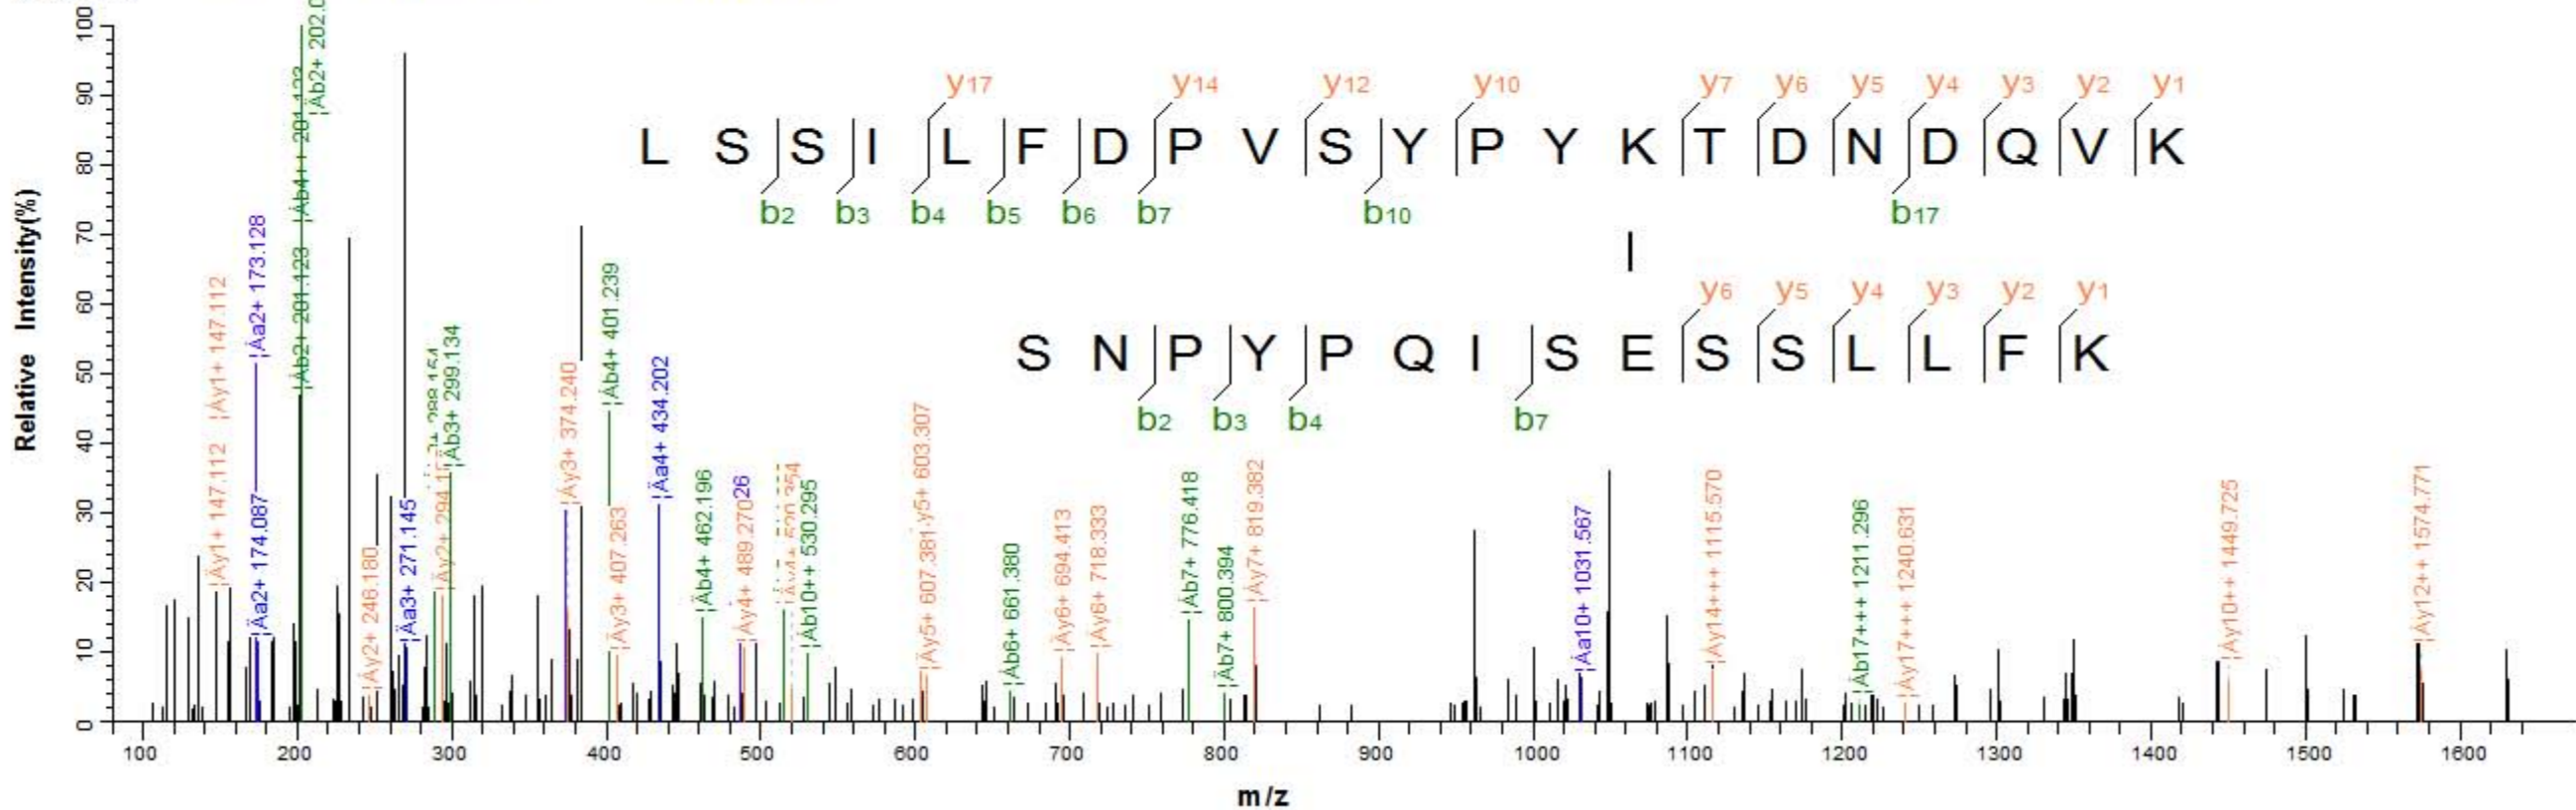

Charge: 5 MH+: 5122.3356 Score: 3.23e-010

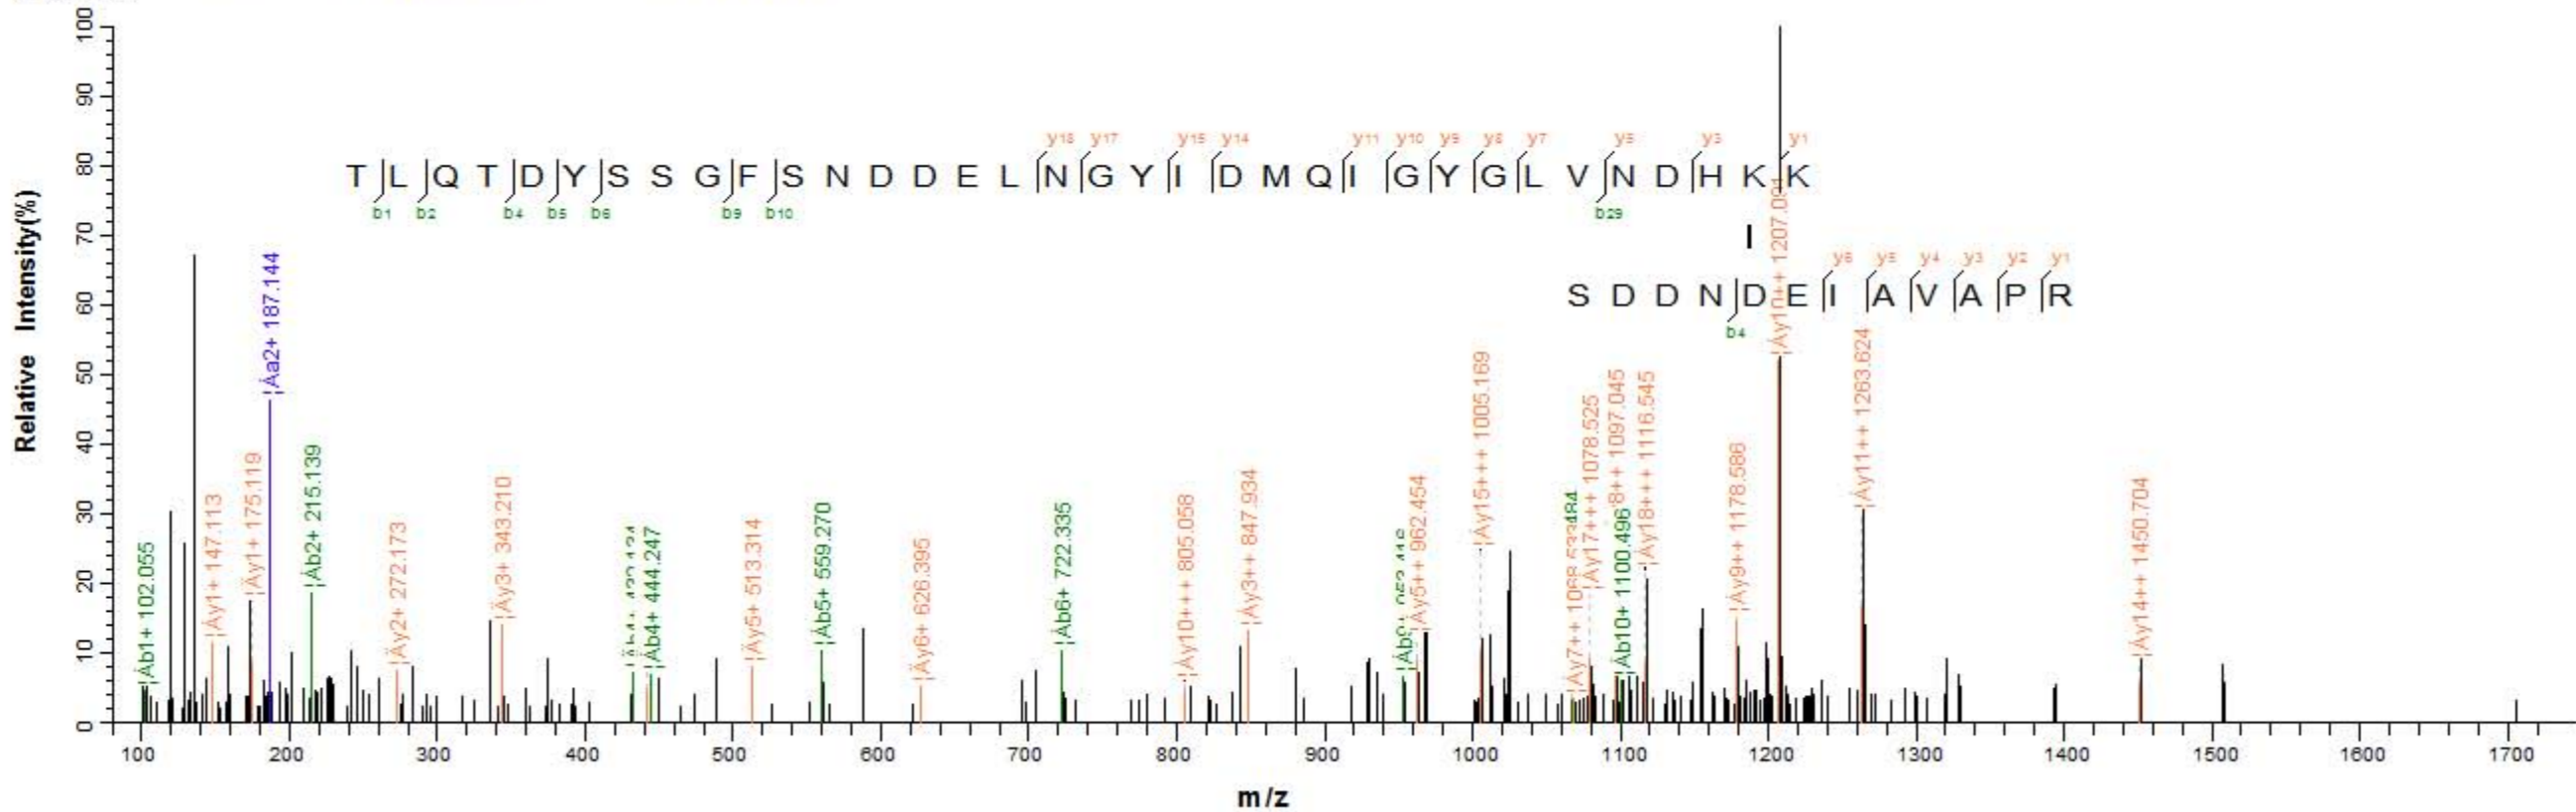

Charge: 5 MH+: 2833.4352 Score: 2.49e-006

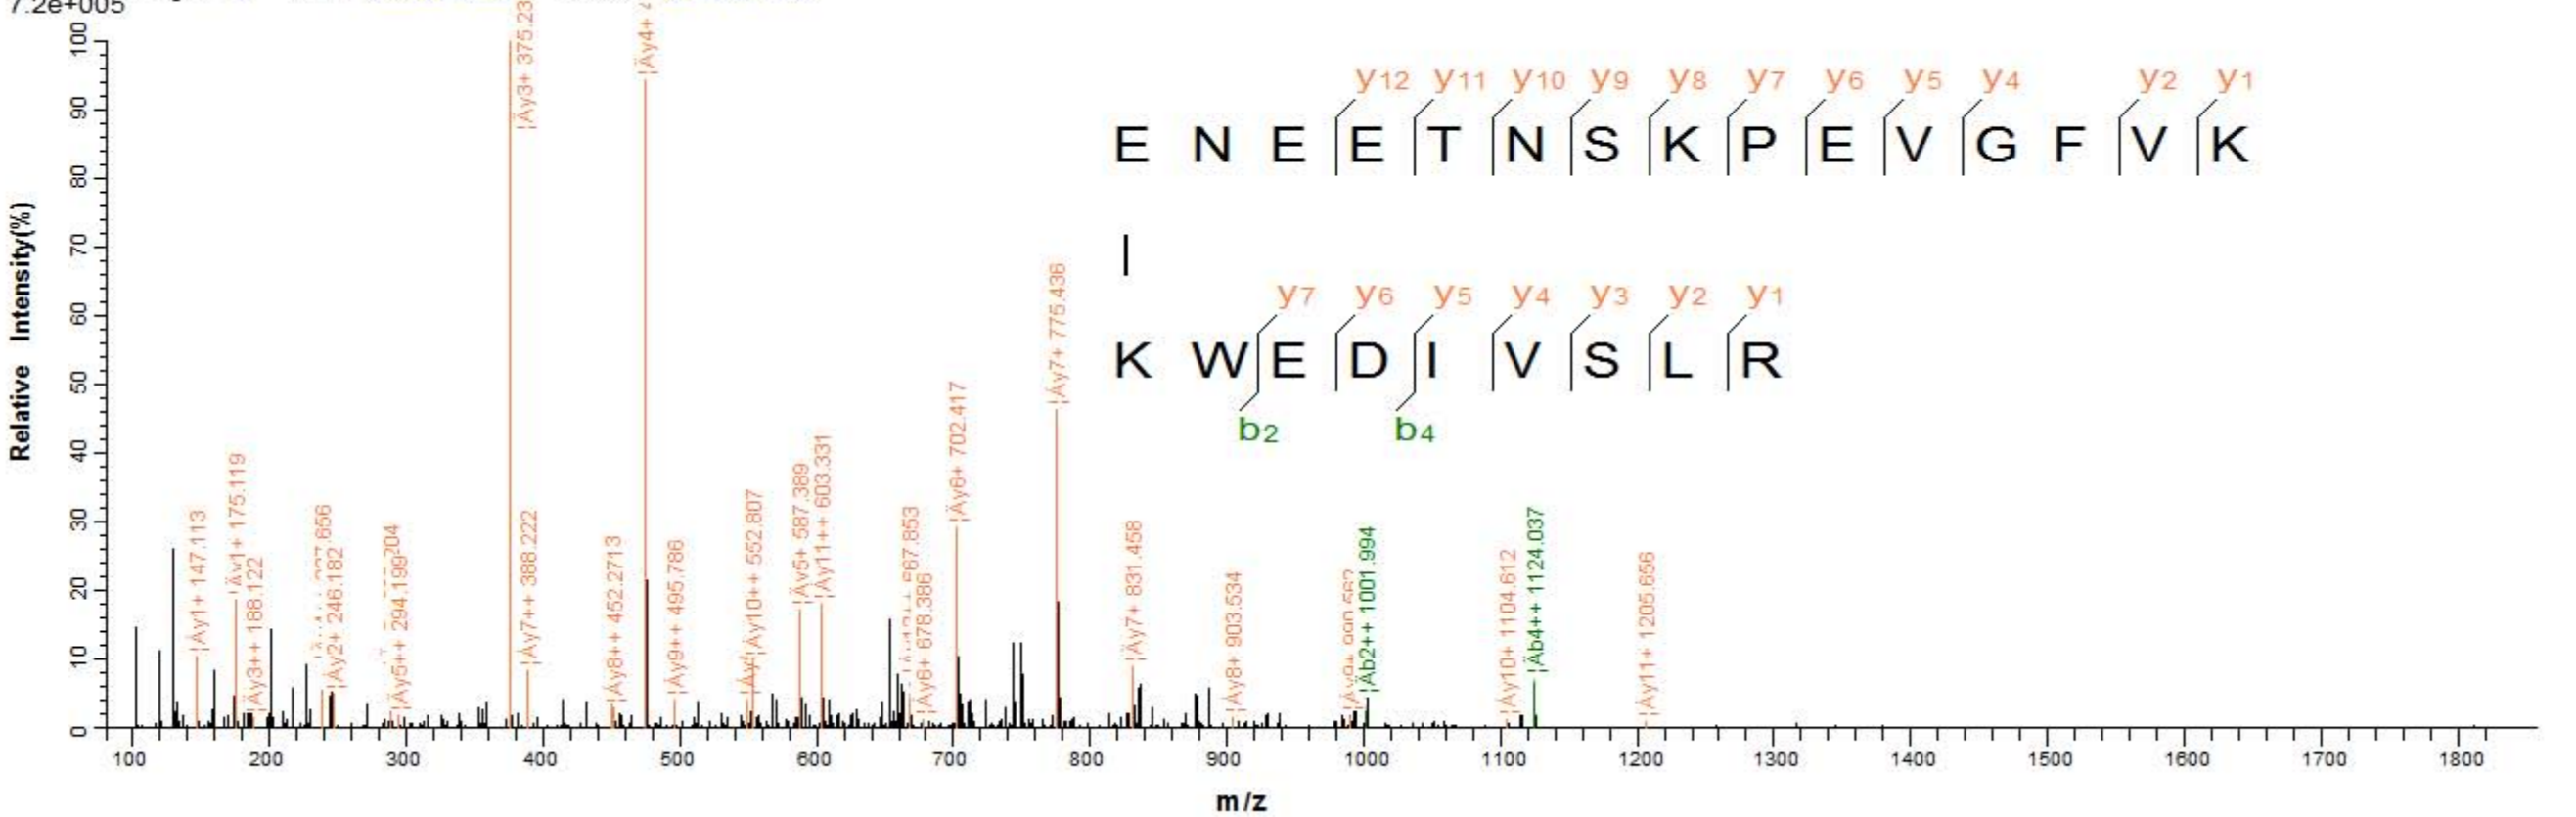

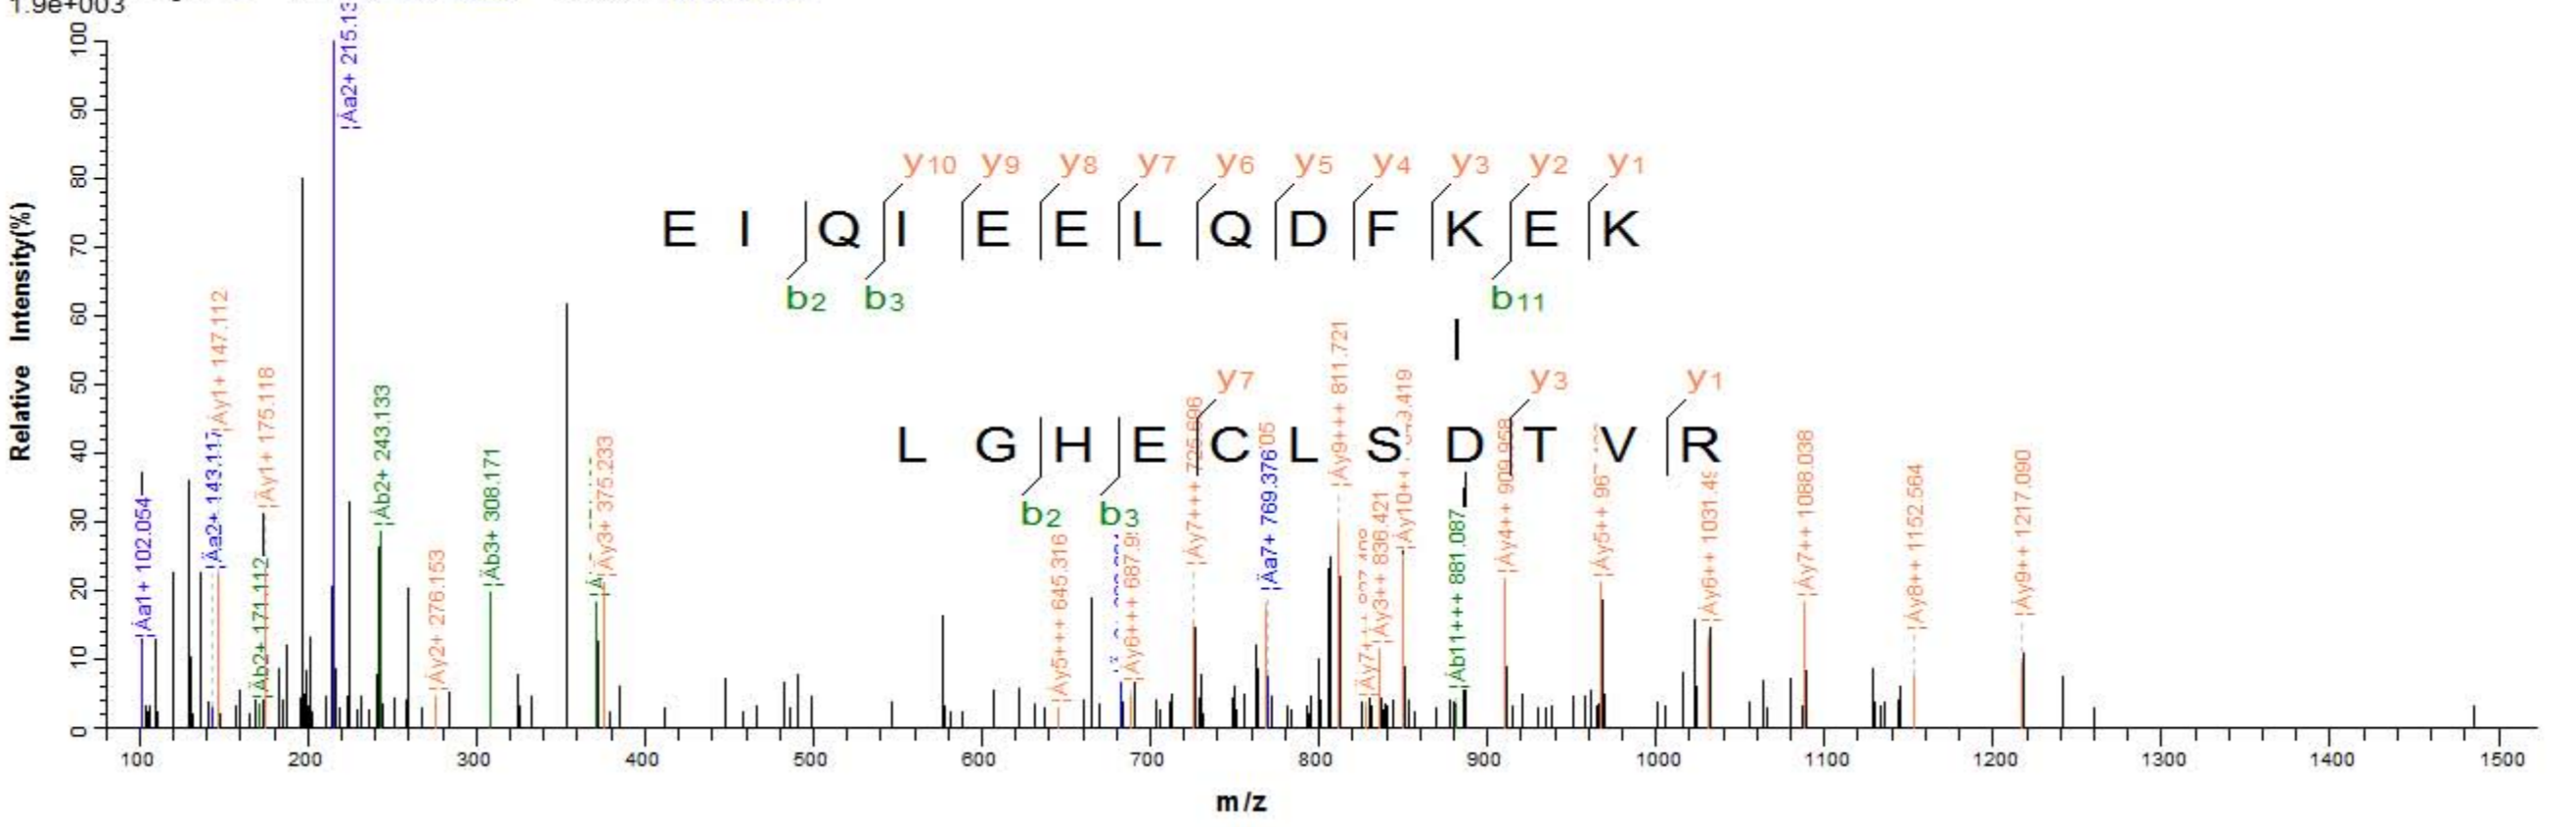

Charge: 5 MH+: 4855.2897 Score: 6.01e-010

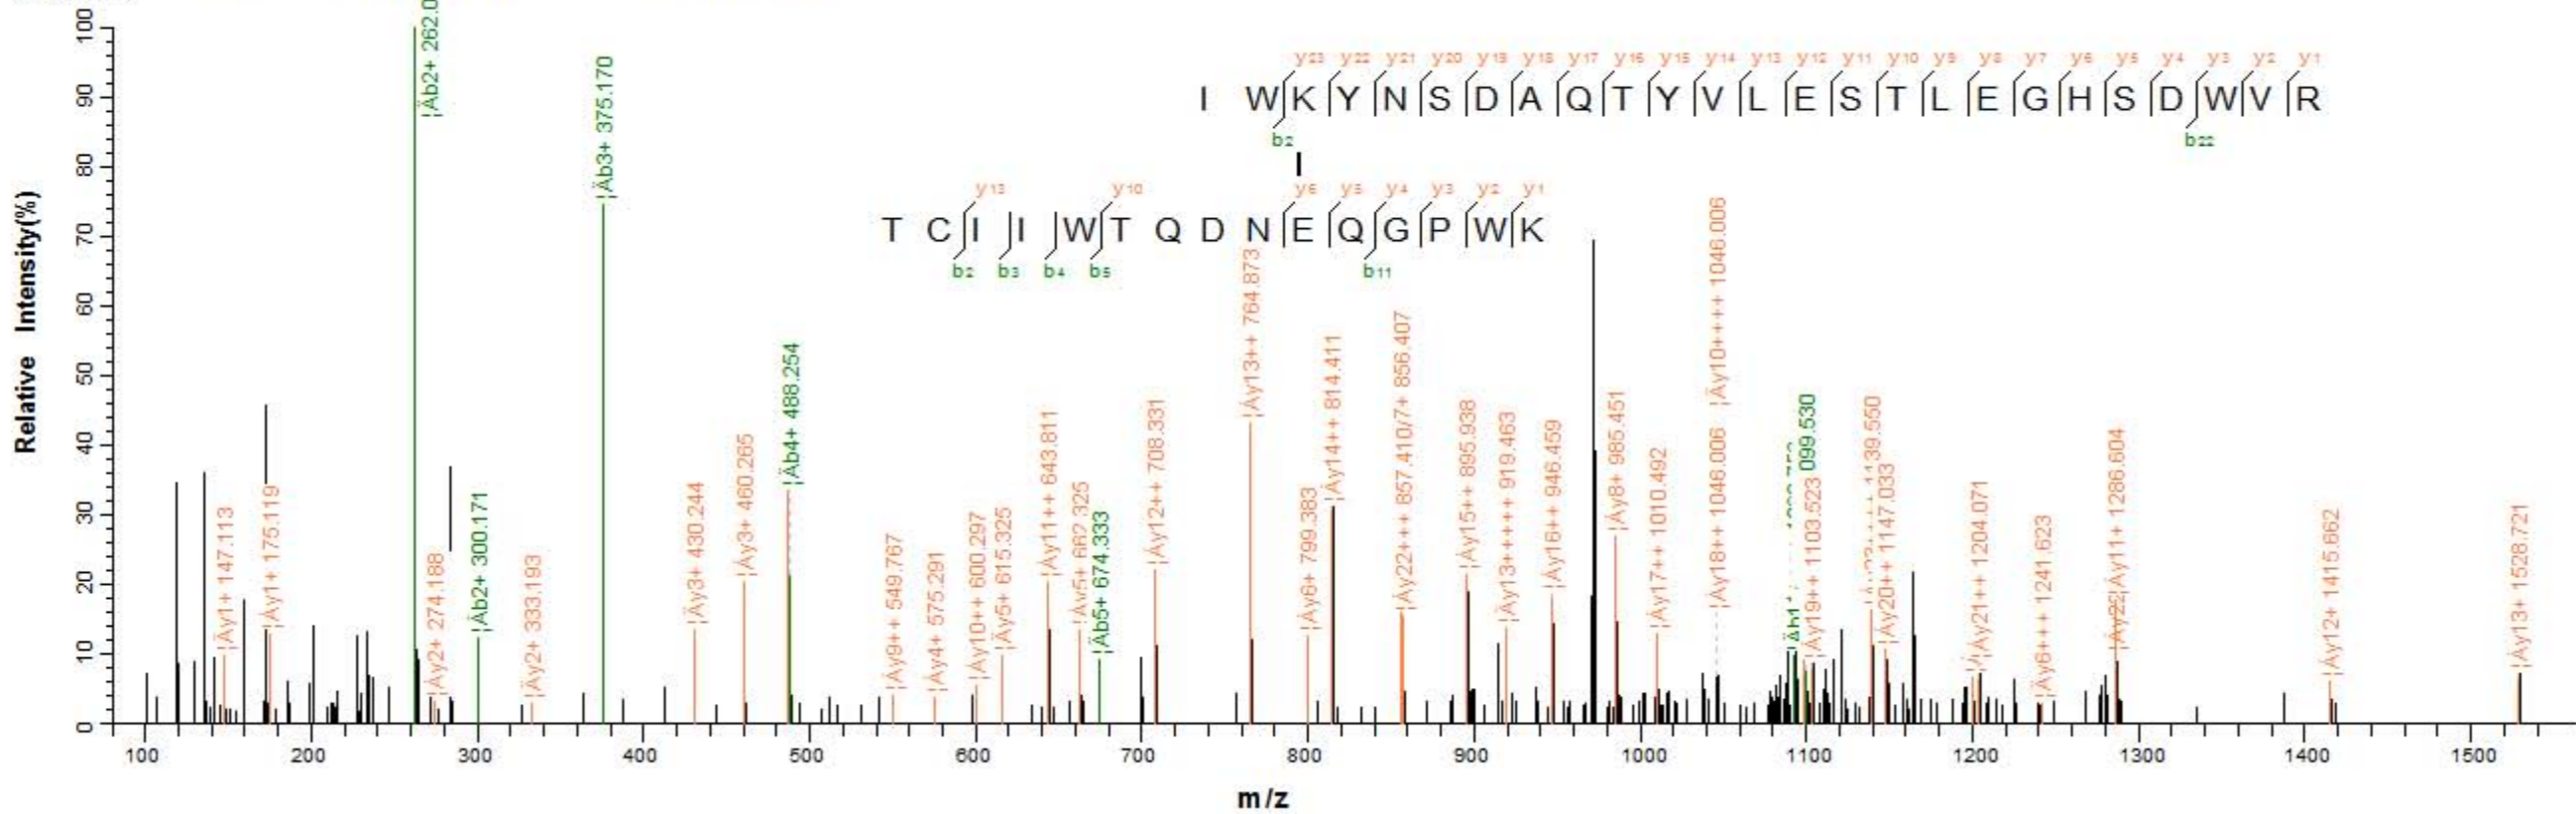

Supplement: supp_M114.041673_mcp.M114.041673-3.pdf [file supp_M114.041673_mcp.M114.041673-3.pdf]
