# Supplementary material
Source: PubMed Central journal article supplement (PMC4223482)

Charge: 4 MH+: 1442.8781 Score: 5.33e-004

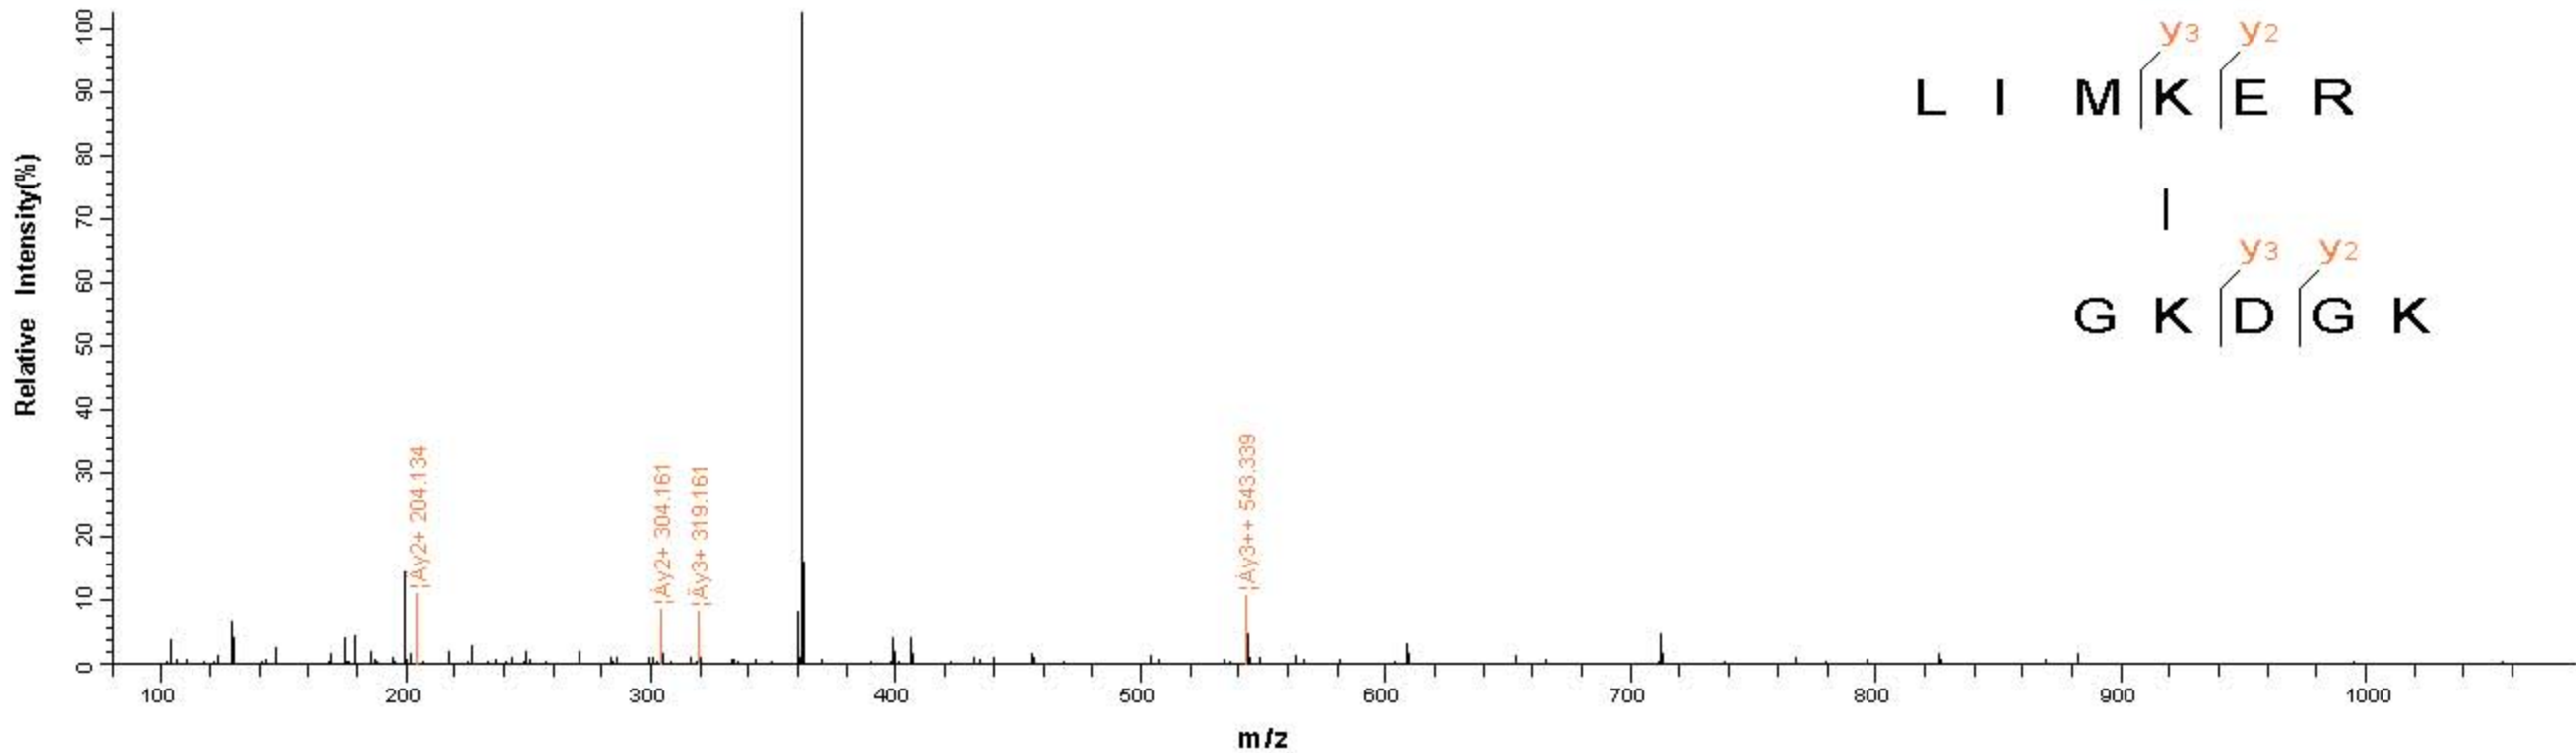

L I M <sup>y3</sup> K <sup>y2</sup> E R

I  
G K <sup>y3</sup> D <sup>y2</sup> G K

Charge: 5 MH+: 2071.2761 Score: 9.19e-002

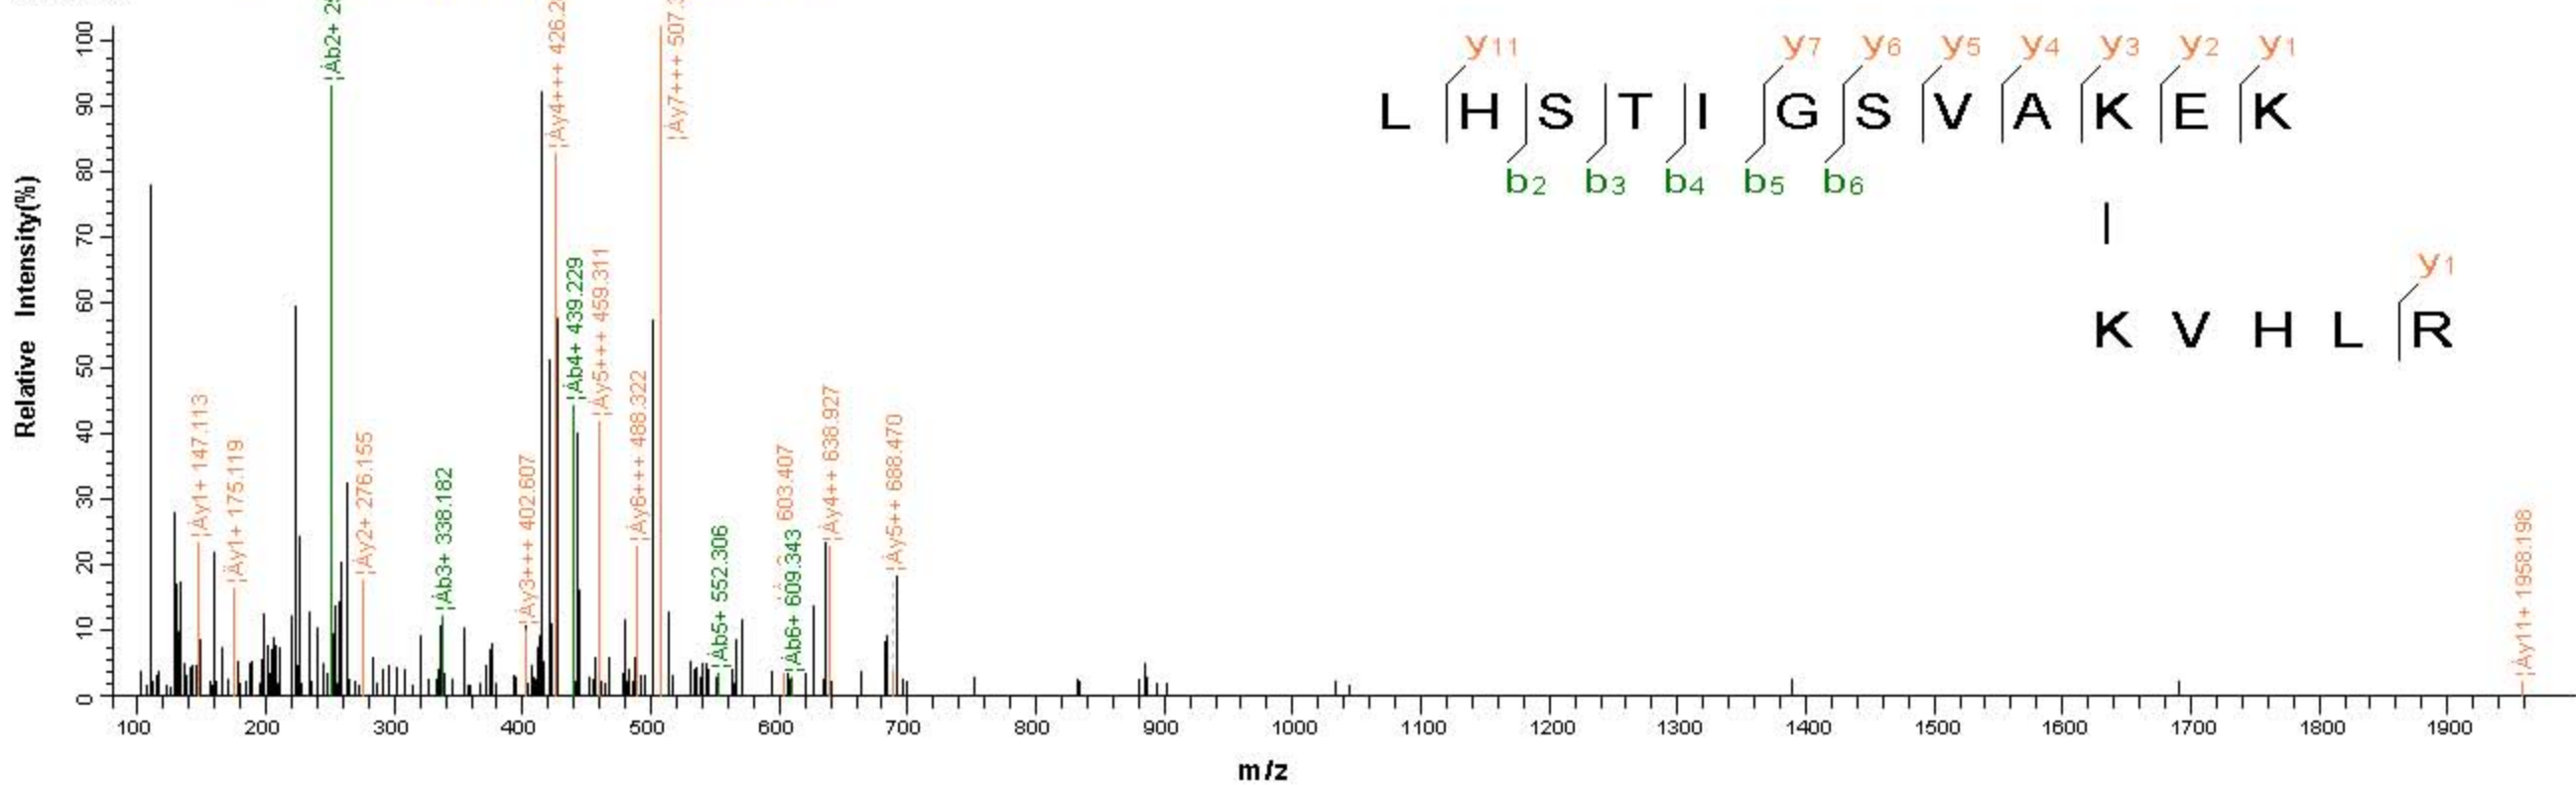

Charge: 4 MH+: 2174.1637 Score: 1.93e-001

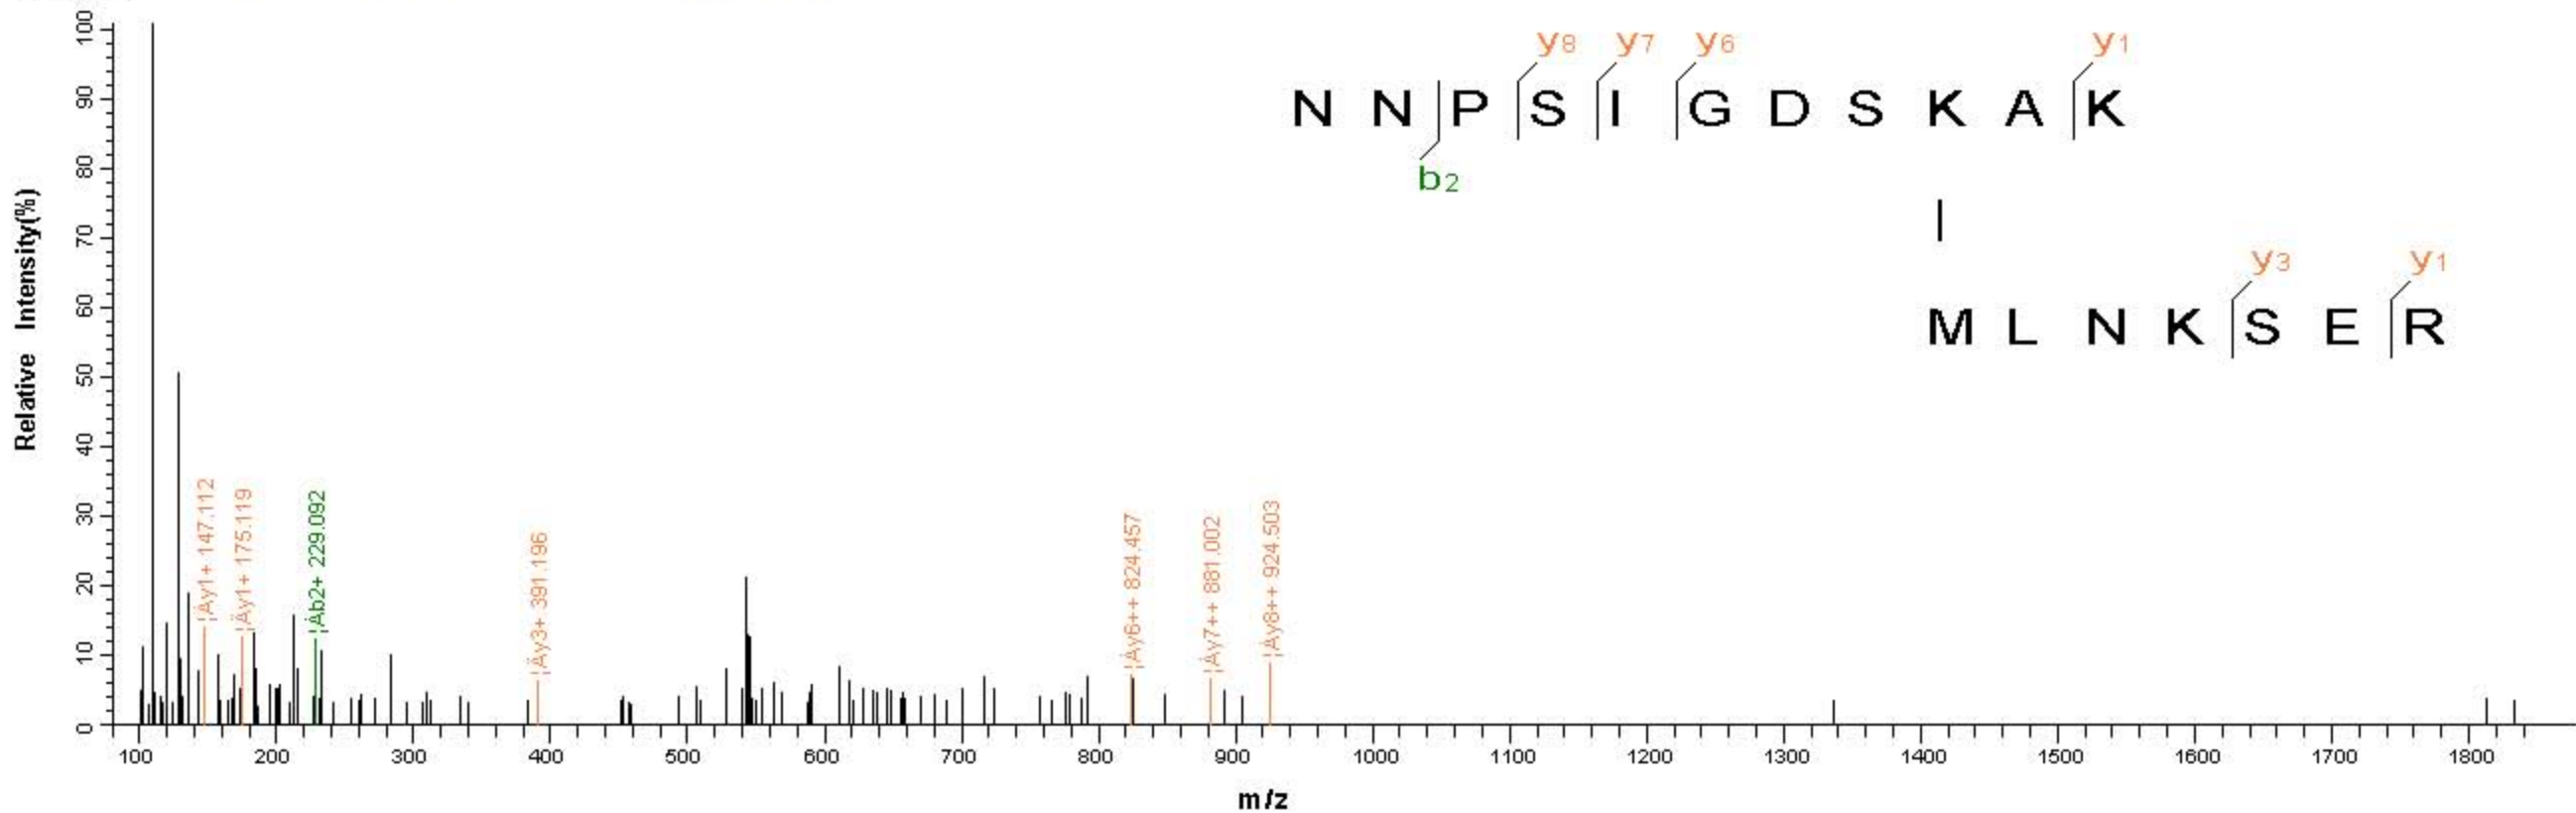

Charge: 5 MH+: 2208.3725 Score: 3.86e-001

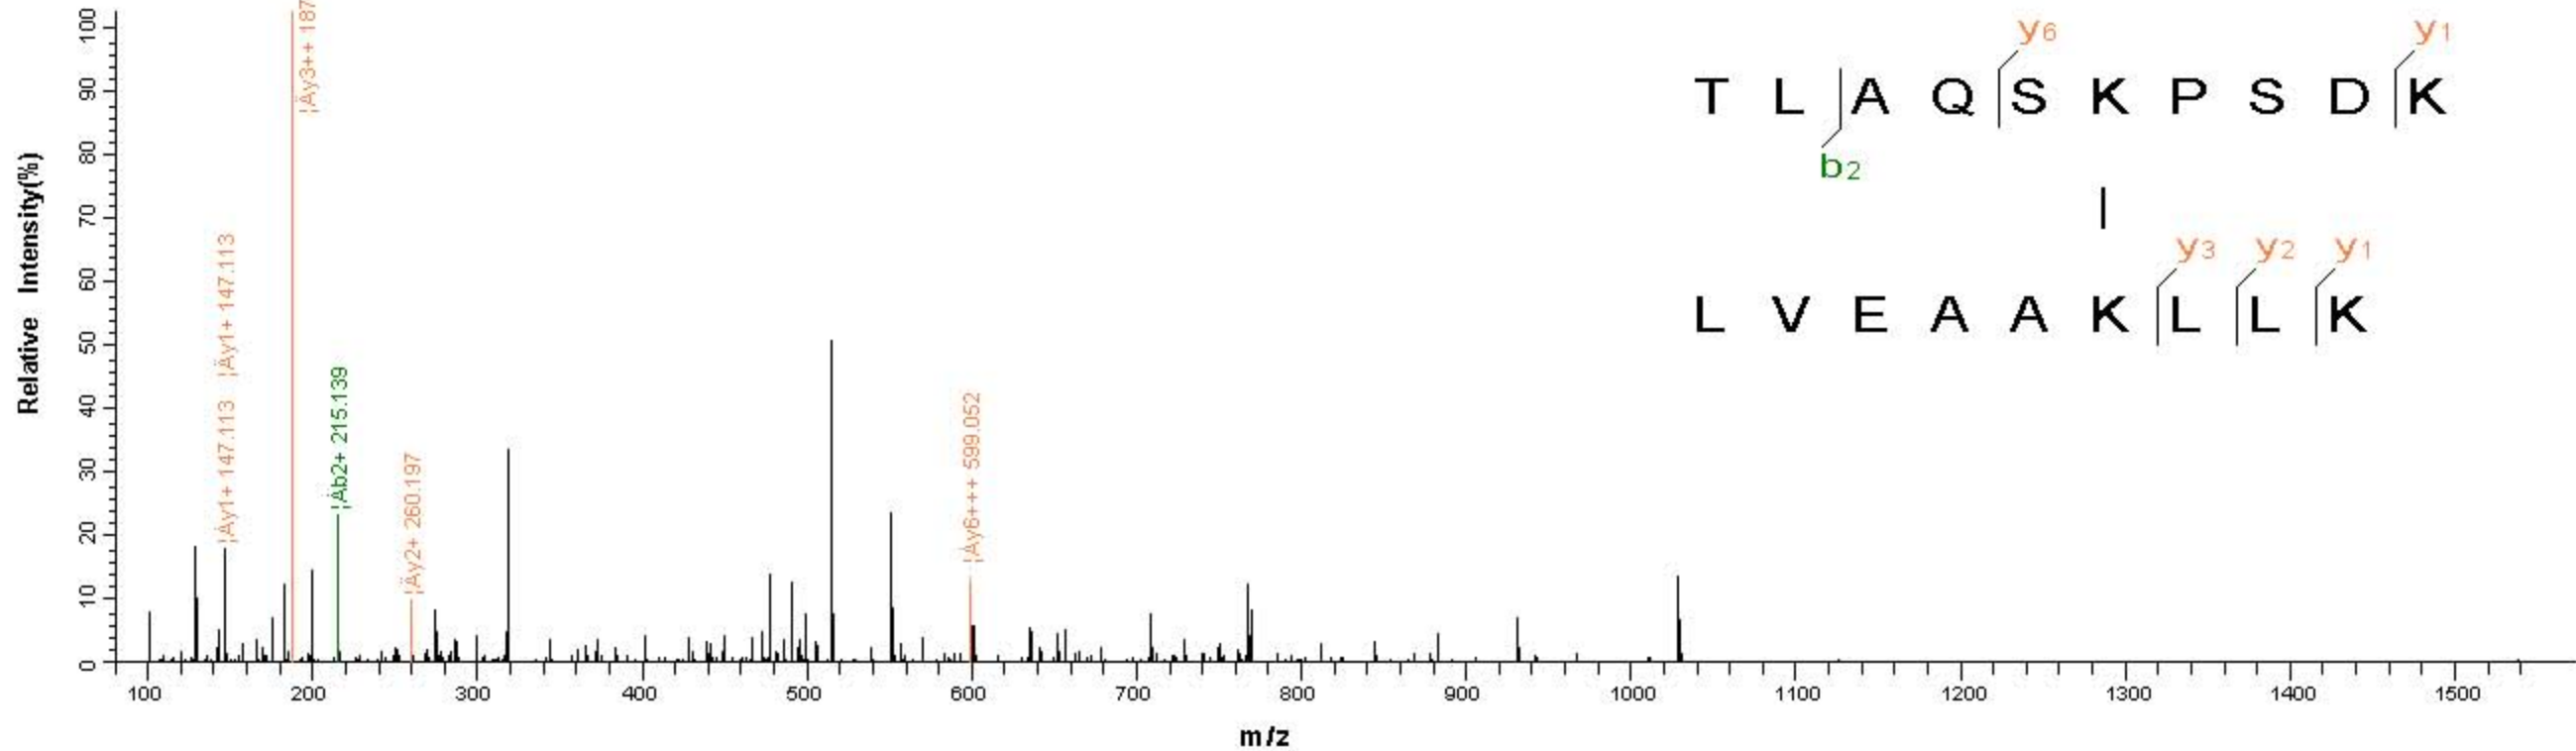

Charge: 4 MH+: 2178.2235 Score: 8.22e-004

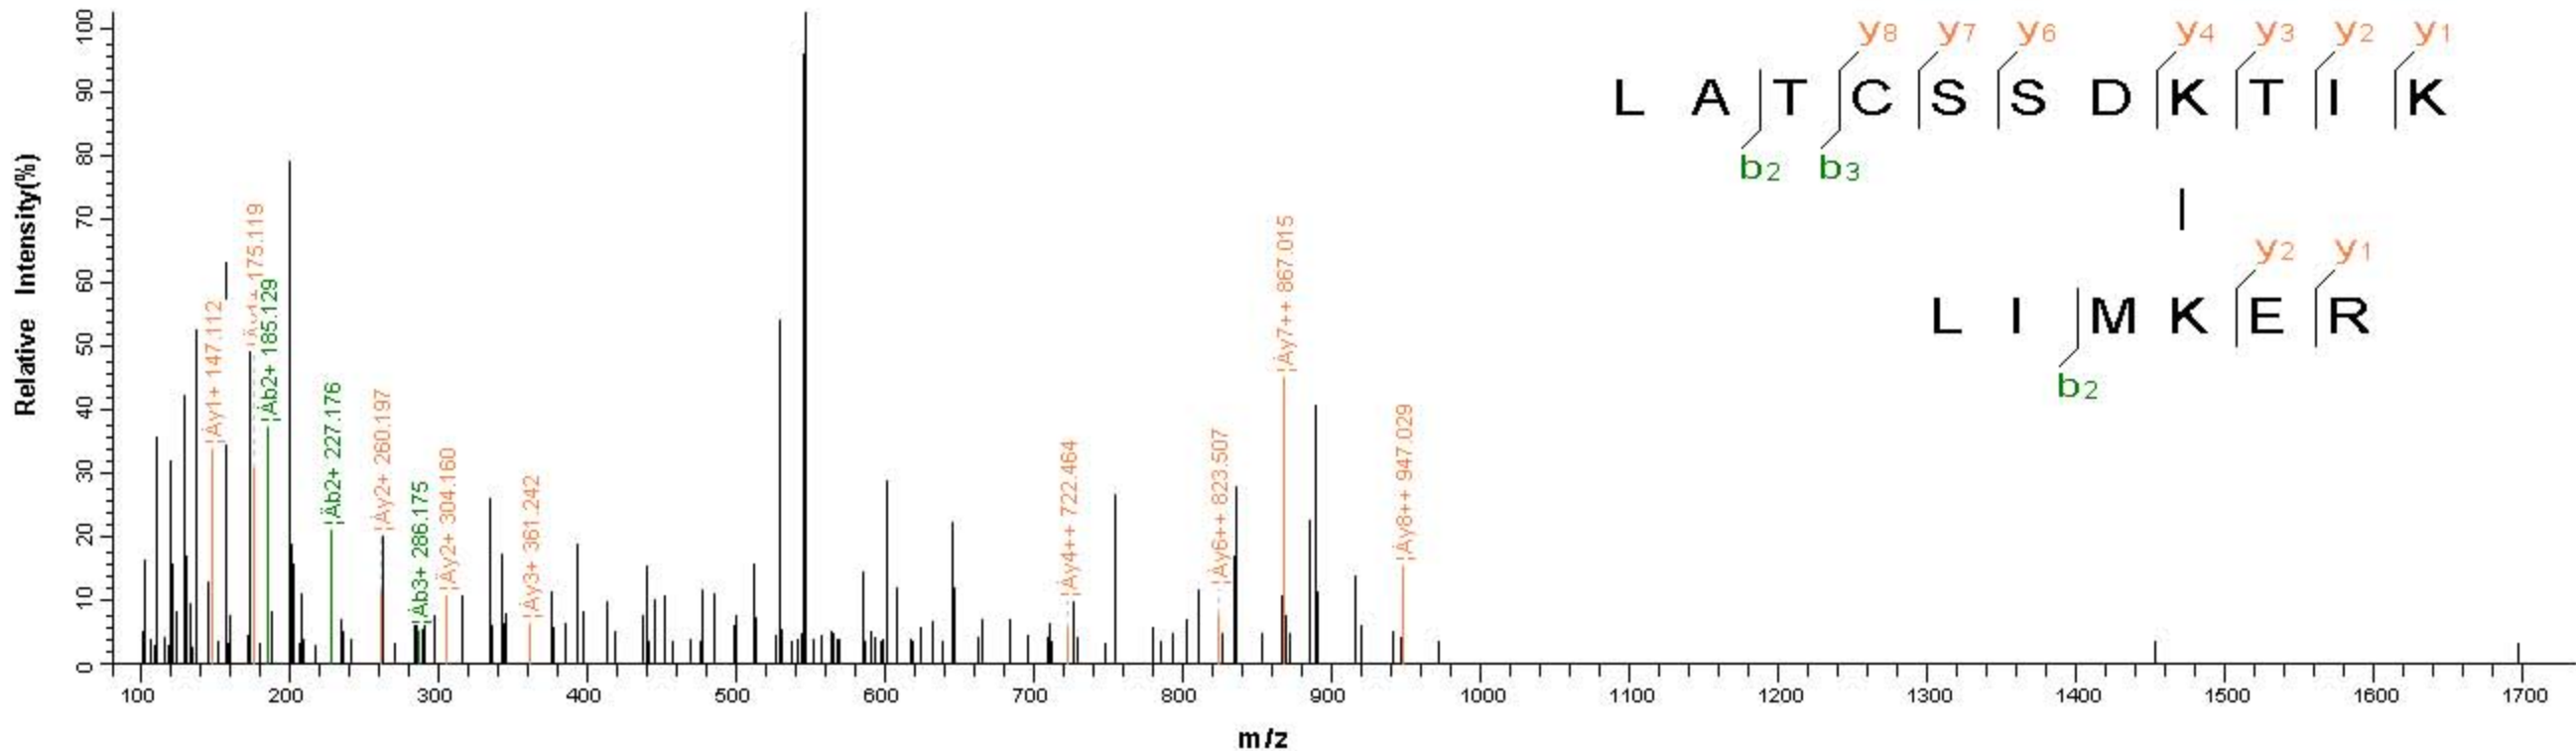

Charge: 4 MH+: 2286.3175 Score: 6.16e-004

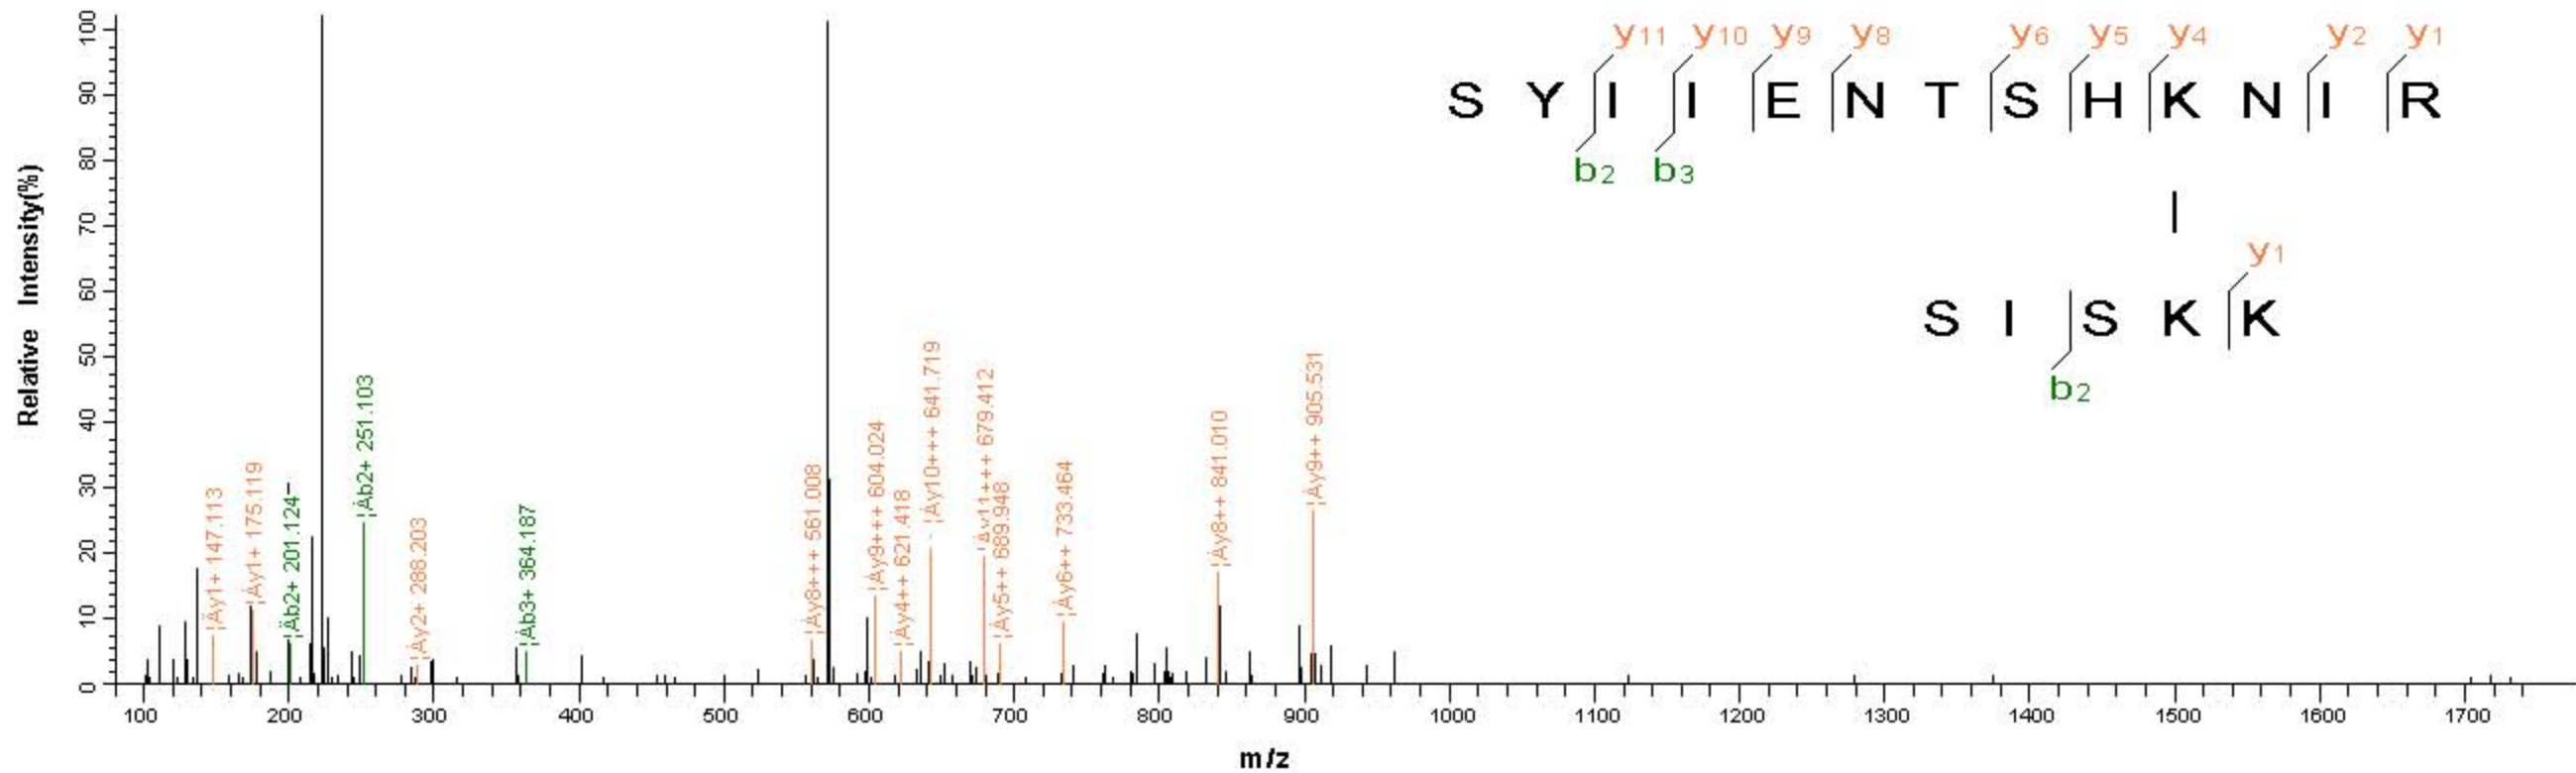

Charge: 4 MH+: 1990.1466 Score: 1.59e-005

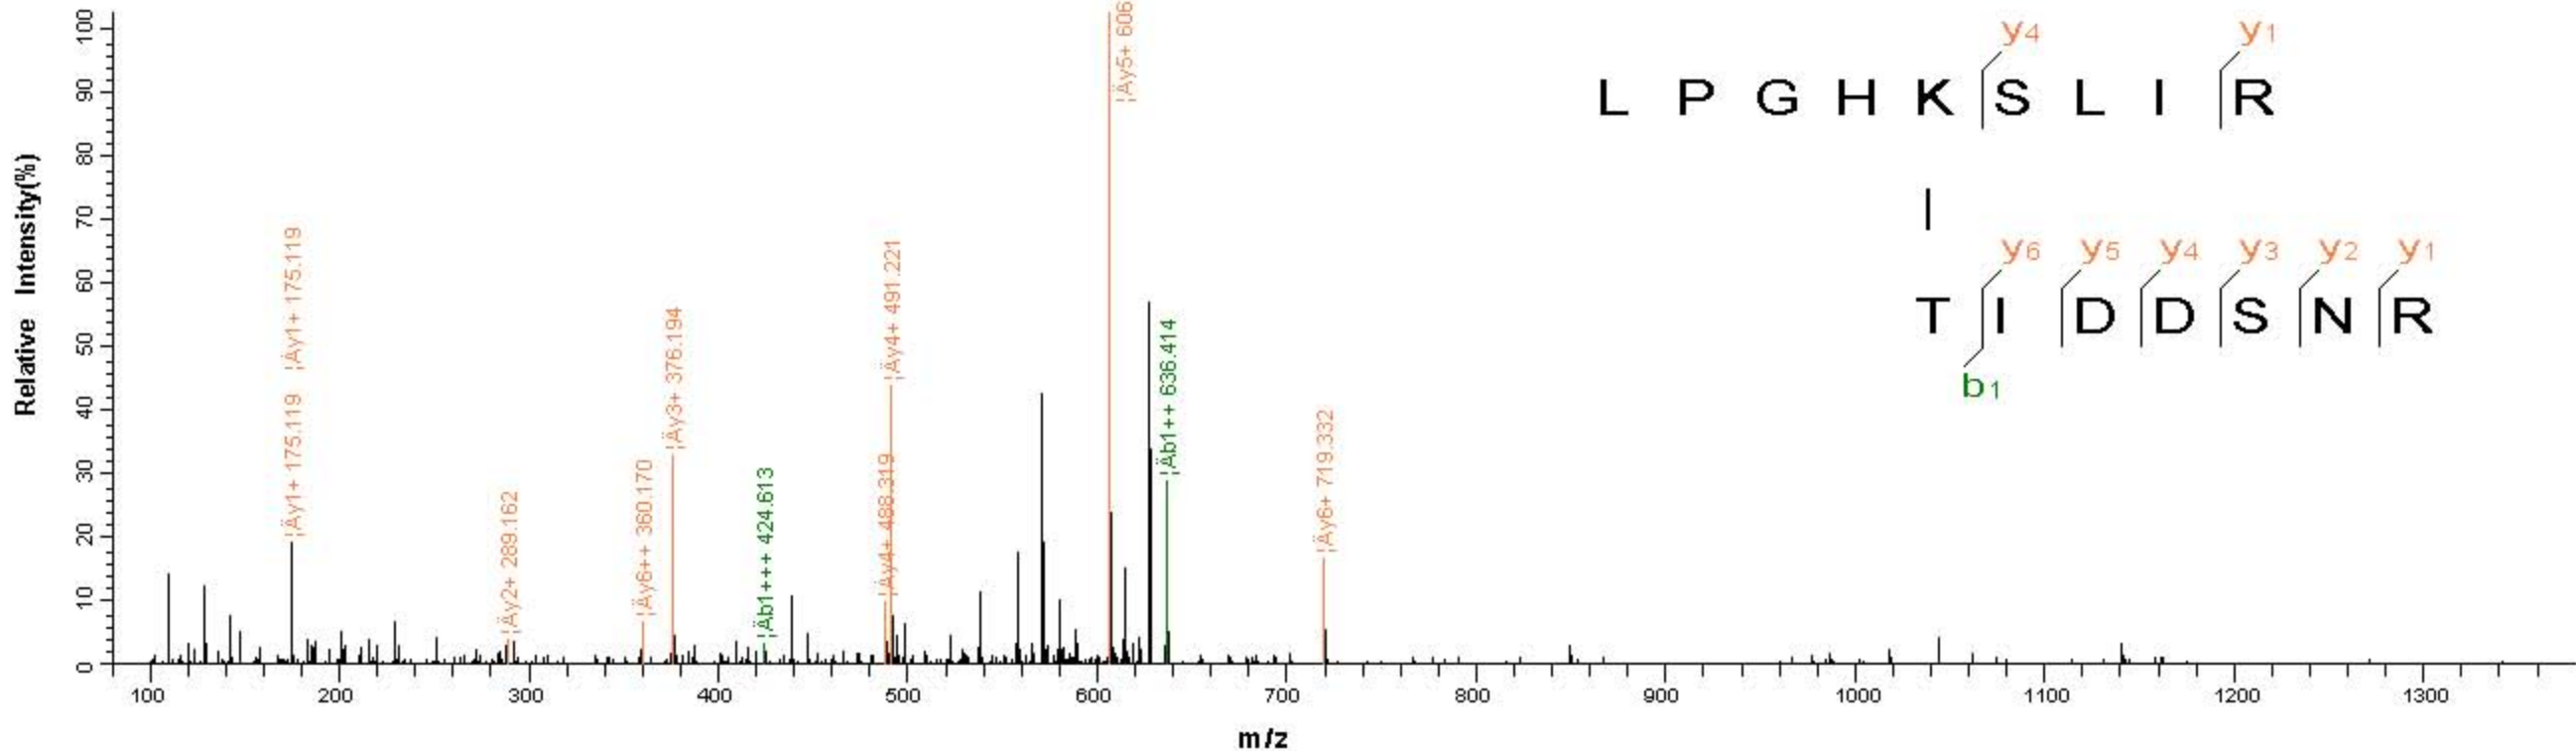

Charge: 4 MH+: 2352.3671 Score: 3.42e-001

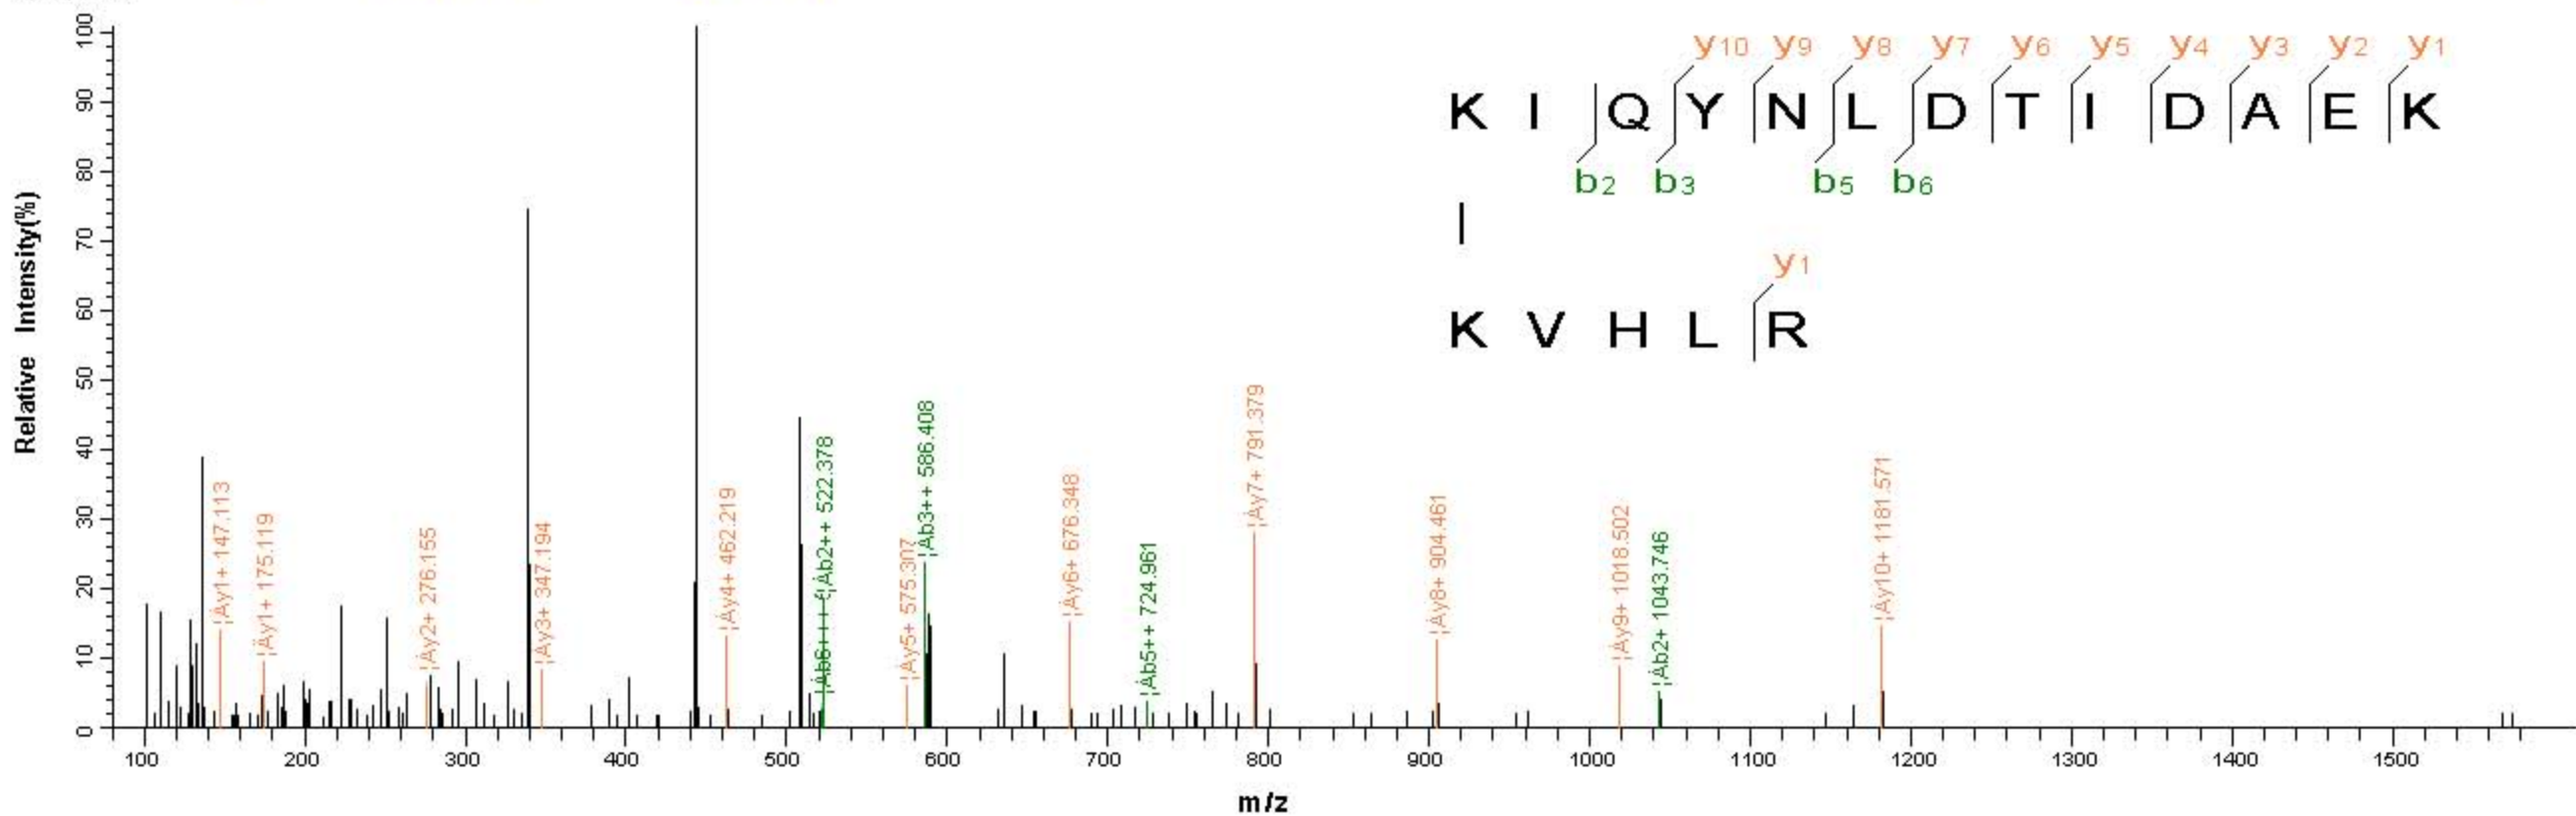



Charge: 5 MH+: 3133.6070 Score: 4.49e-001

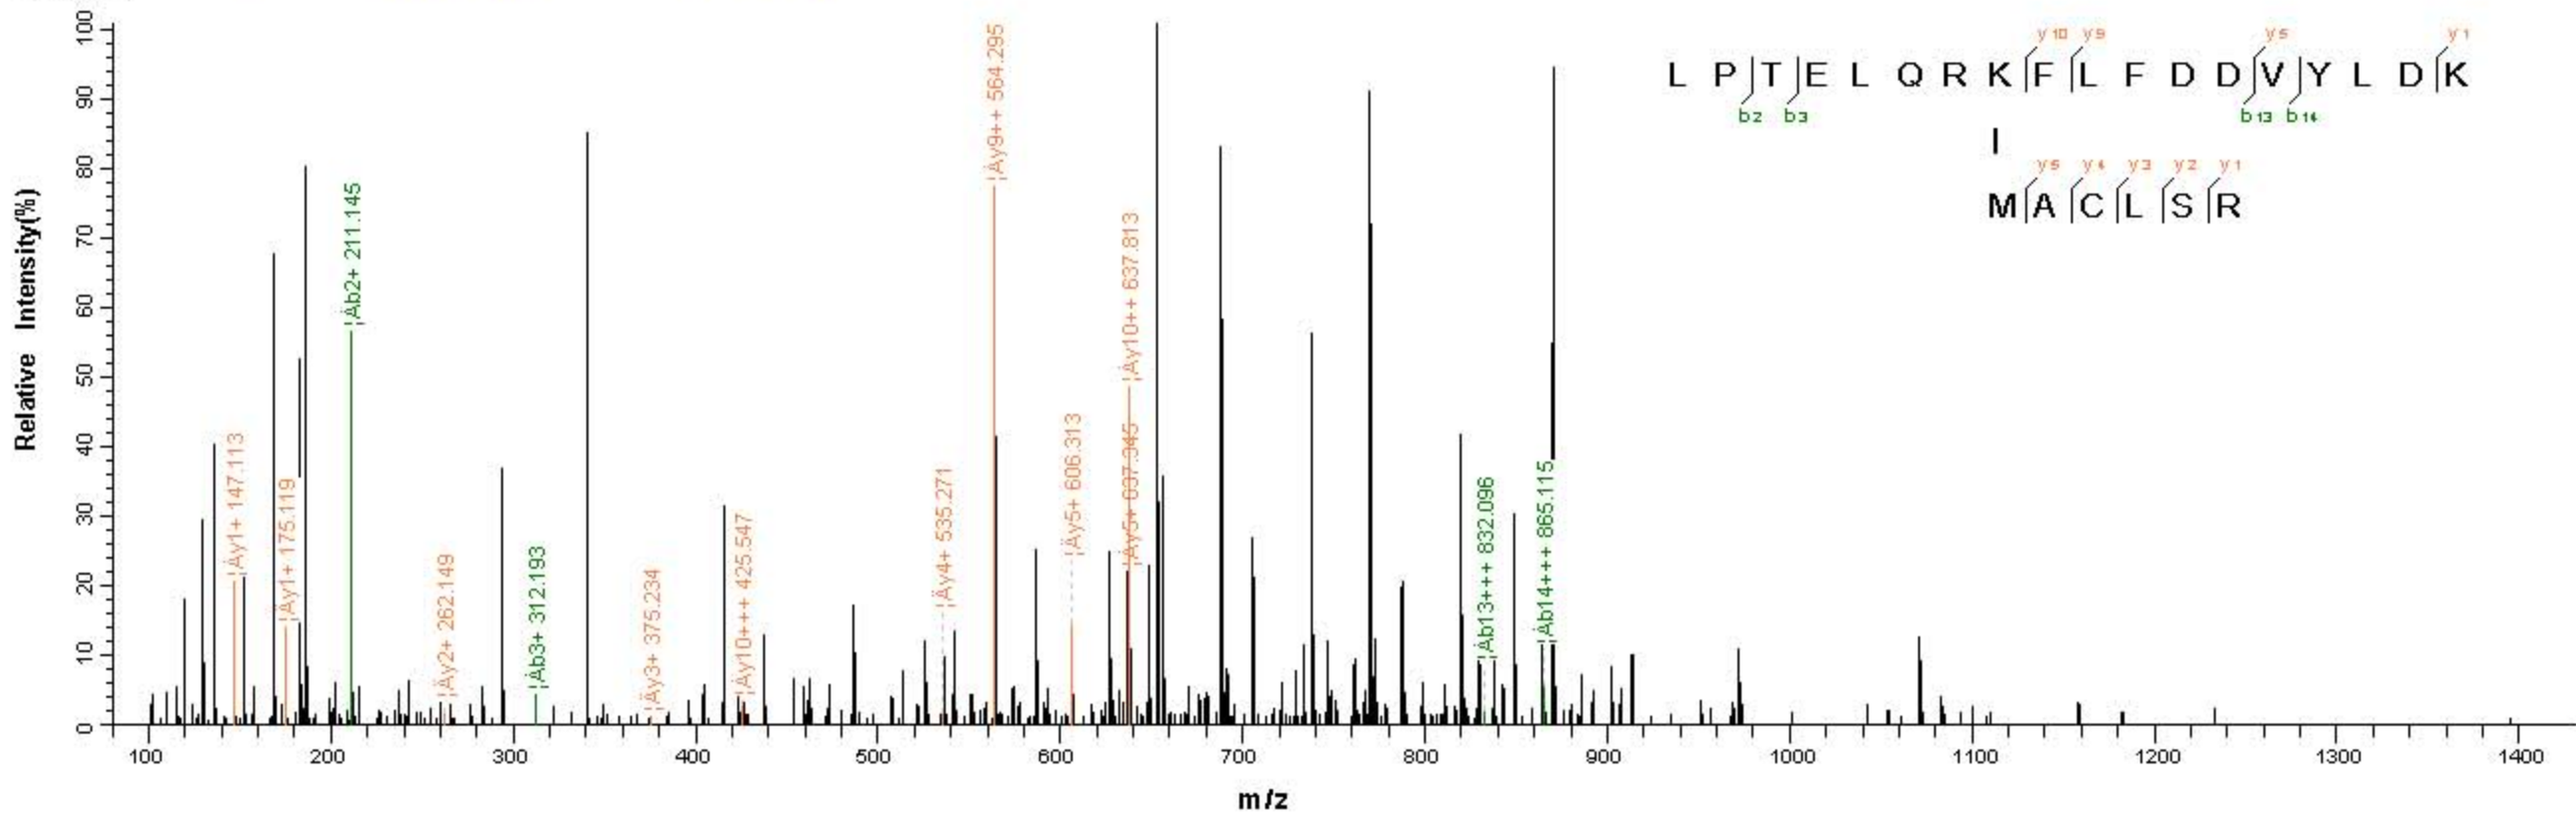

Charge: 5 MH+: 2701.5342 Score: 3.80e-003

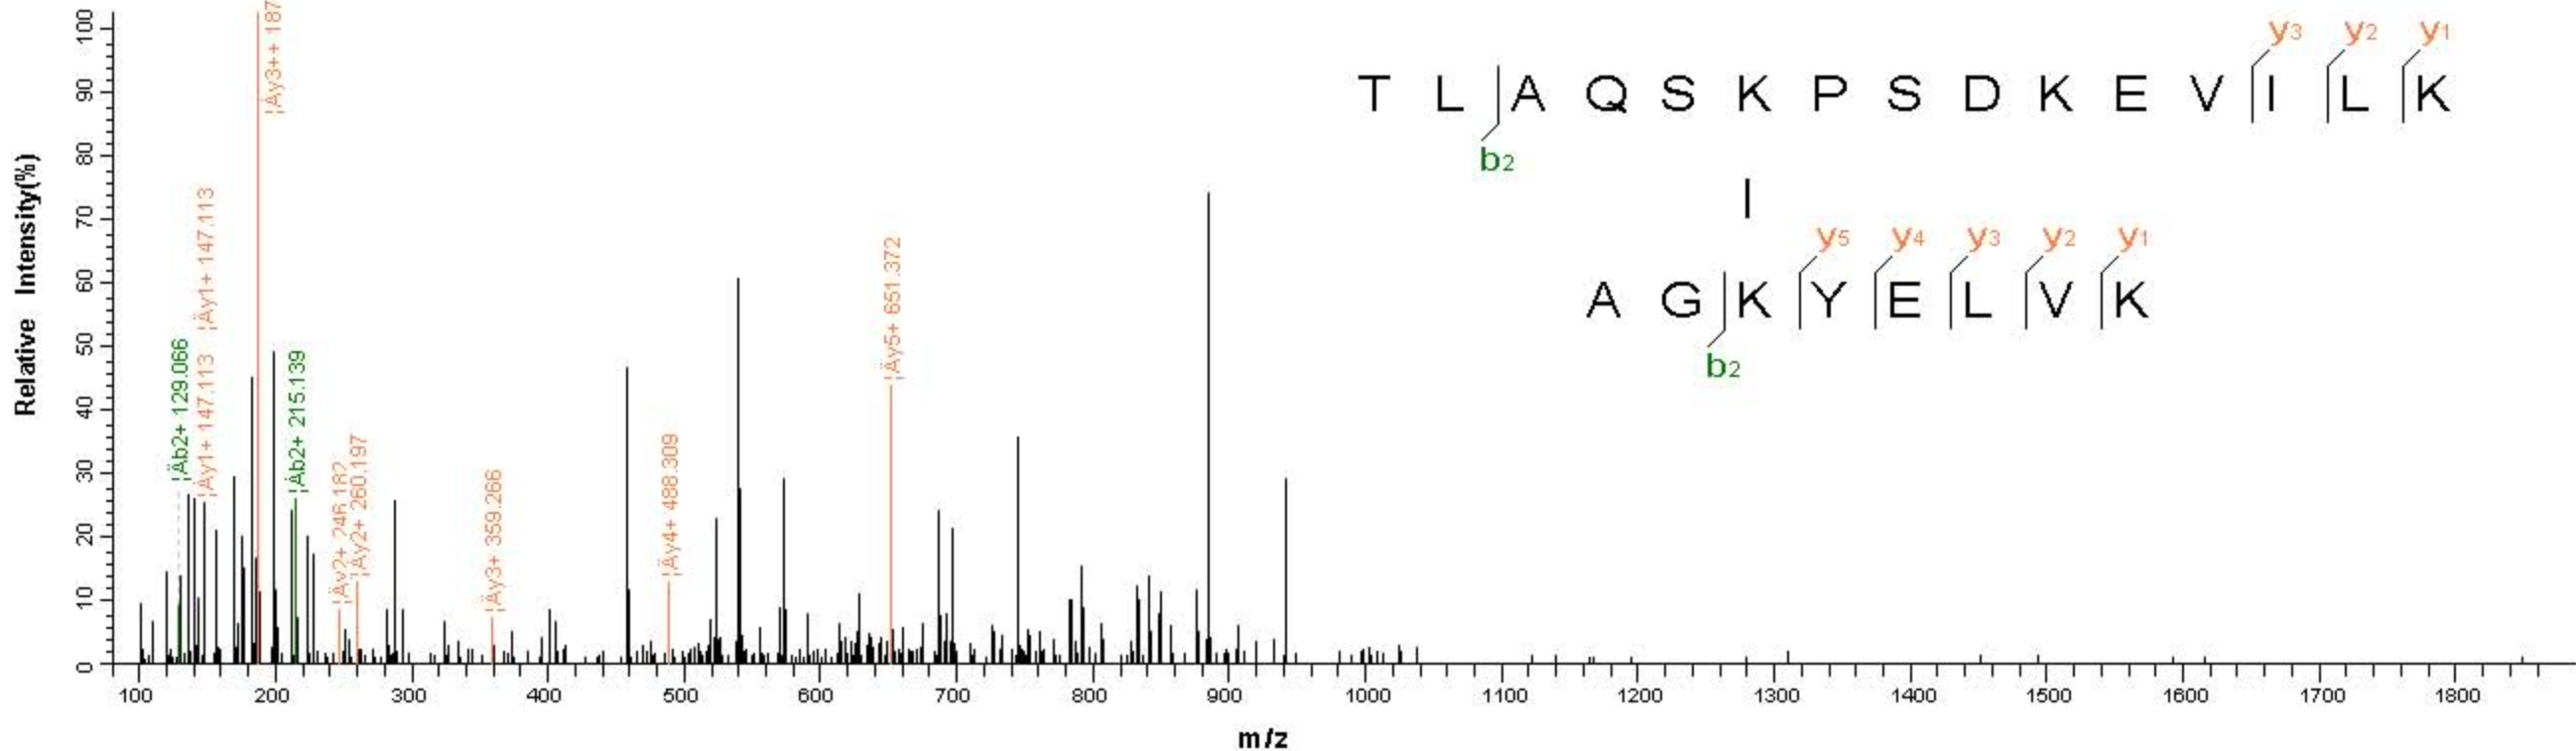

Charge: 4 MH+: 2708.4049 Score: 2.06e-001

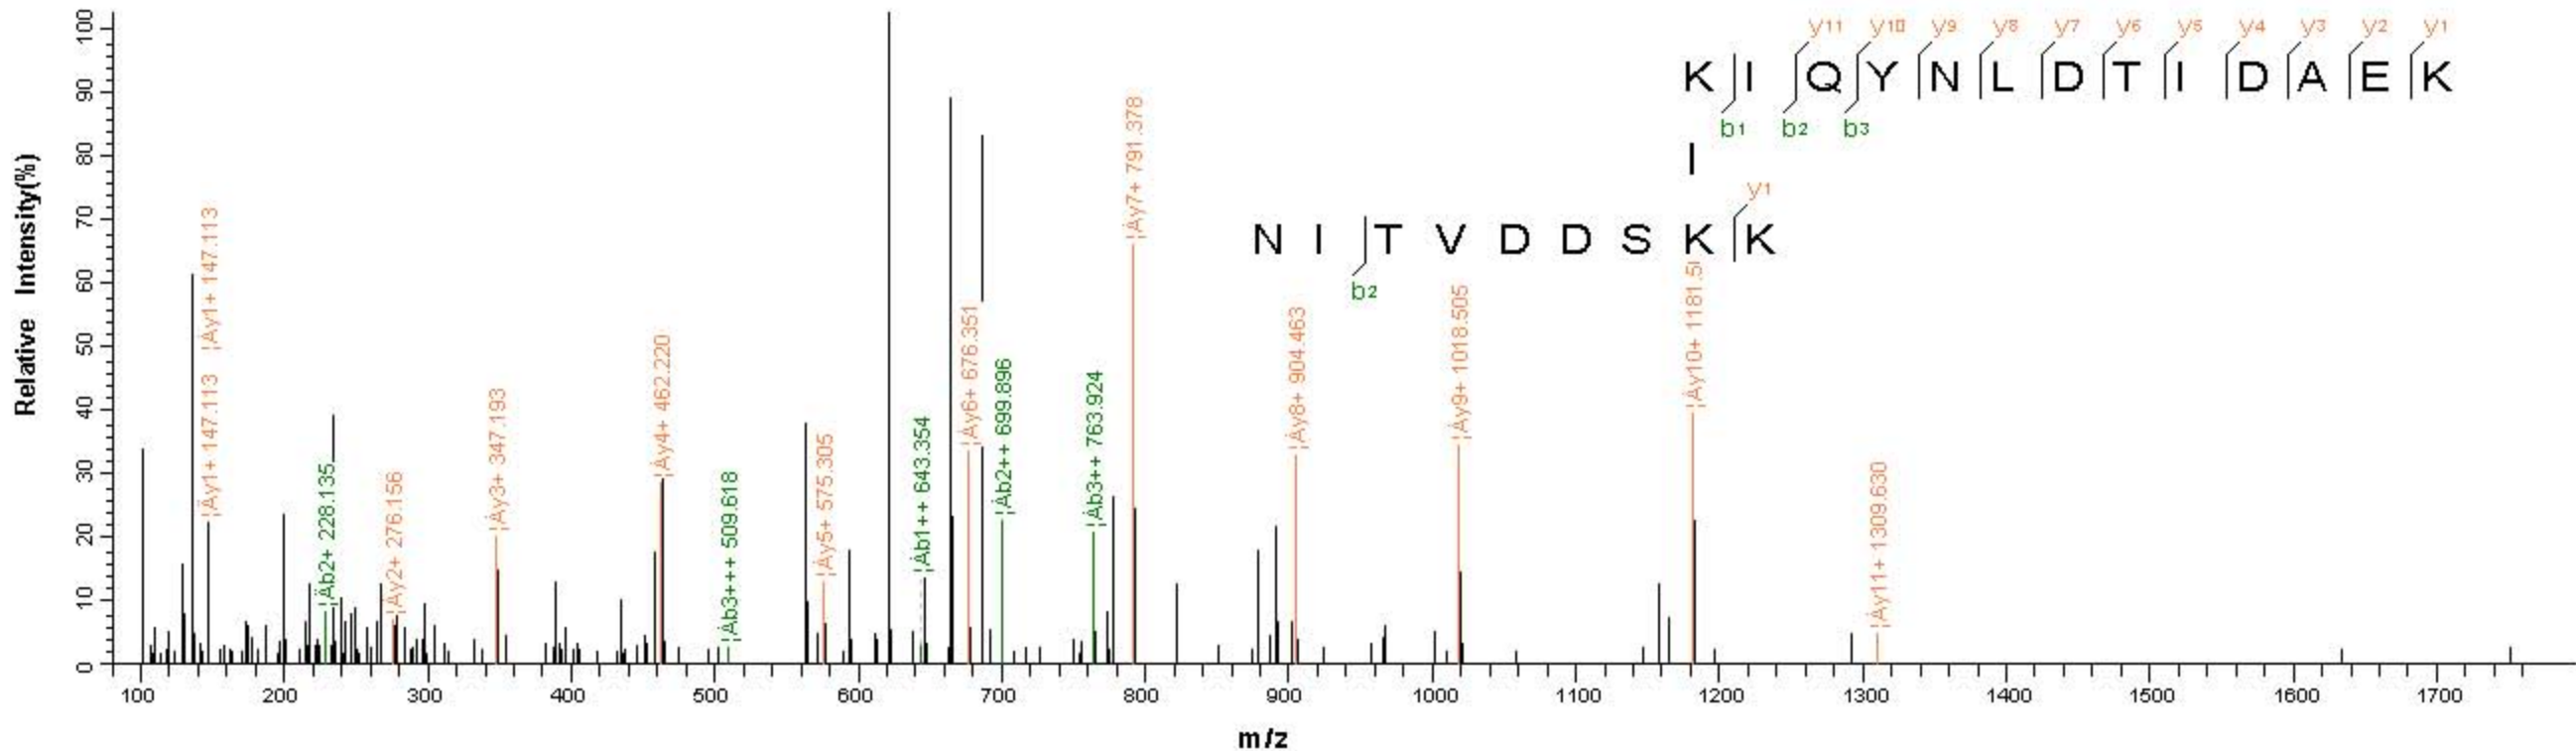

Charge: 5 MH+: 2432.4957 Score: 1.58e-001

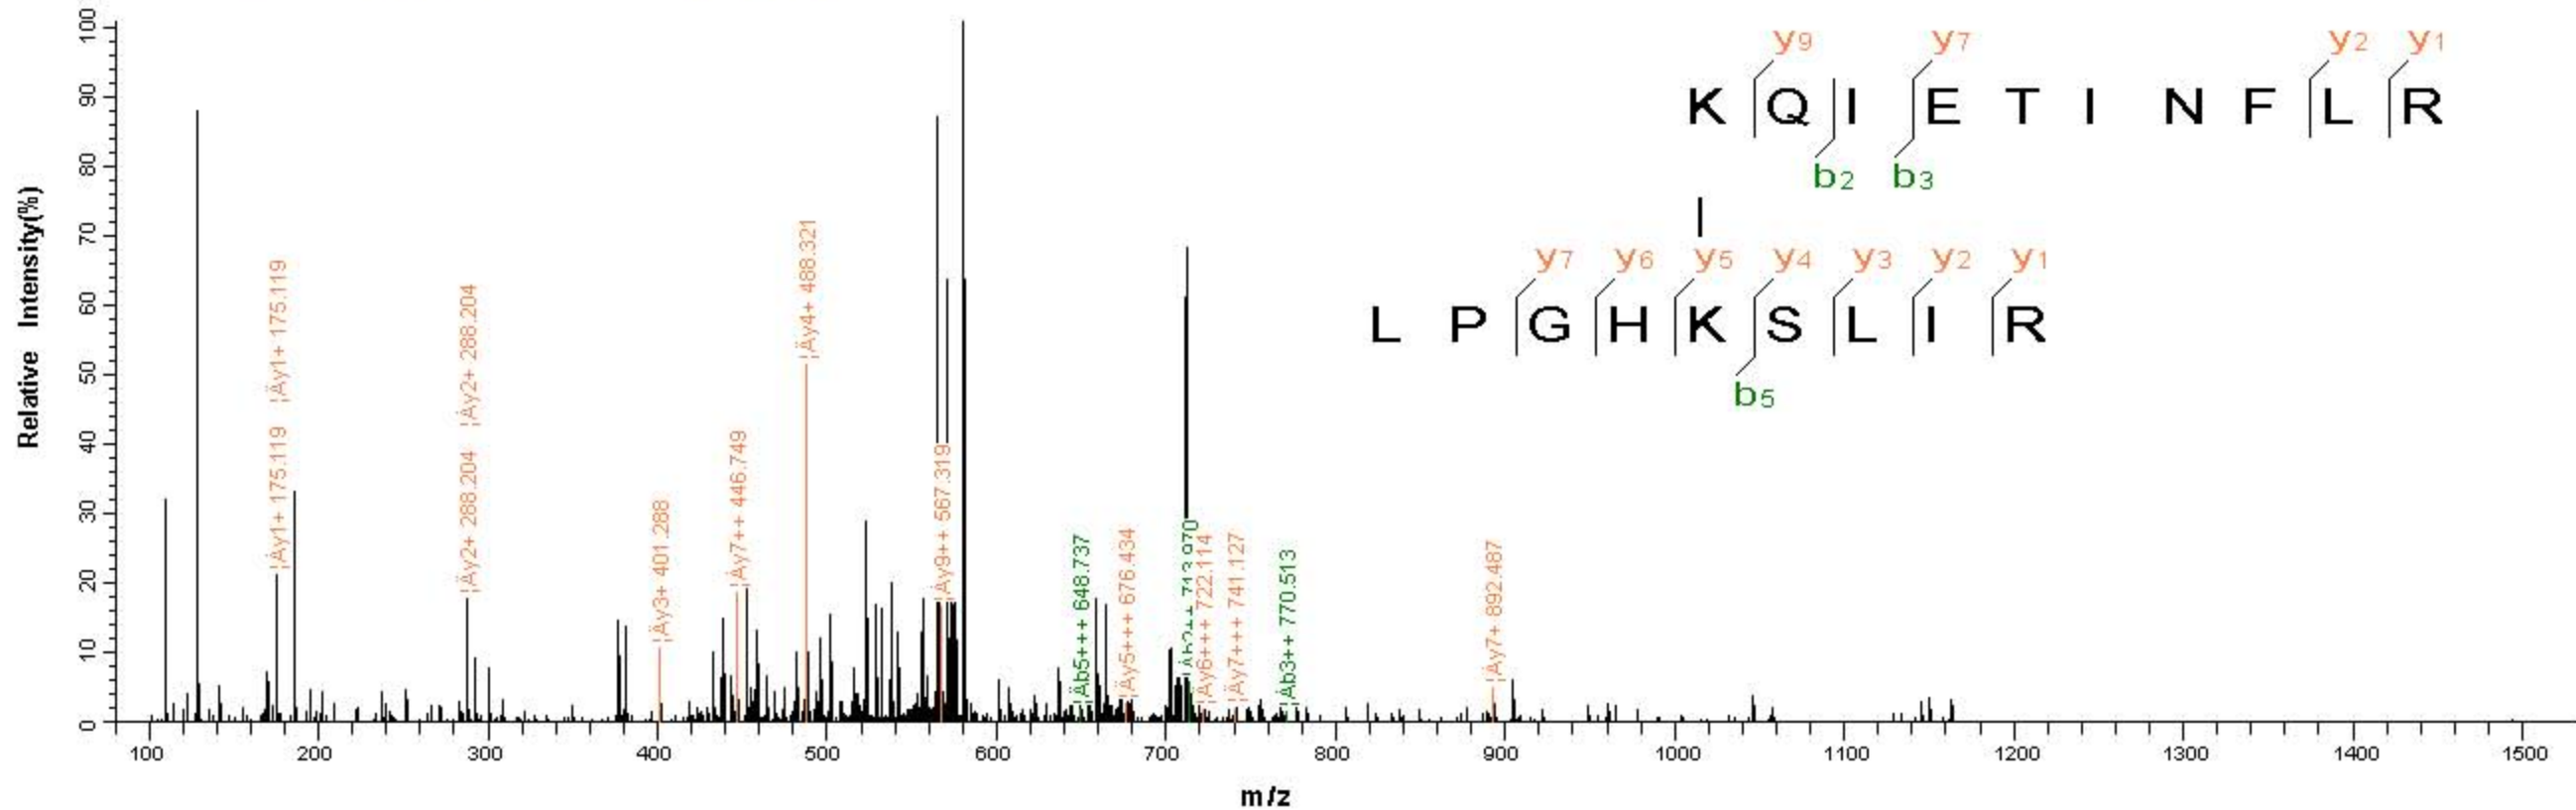

Charge: 5 MH+: 3180.7380 Score: 4.20e-001

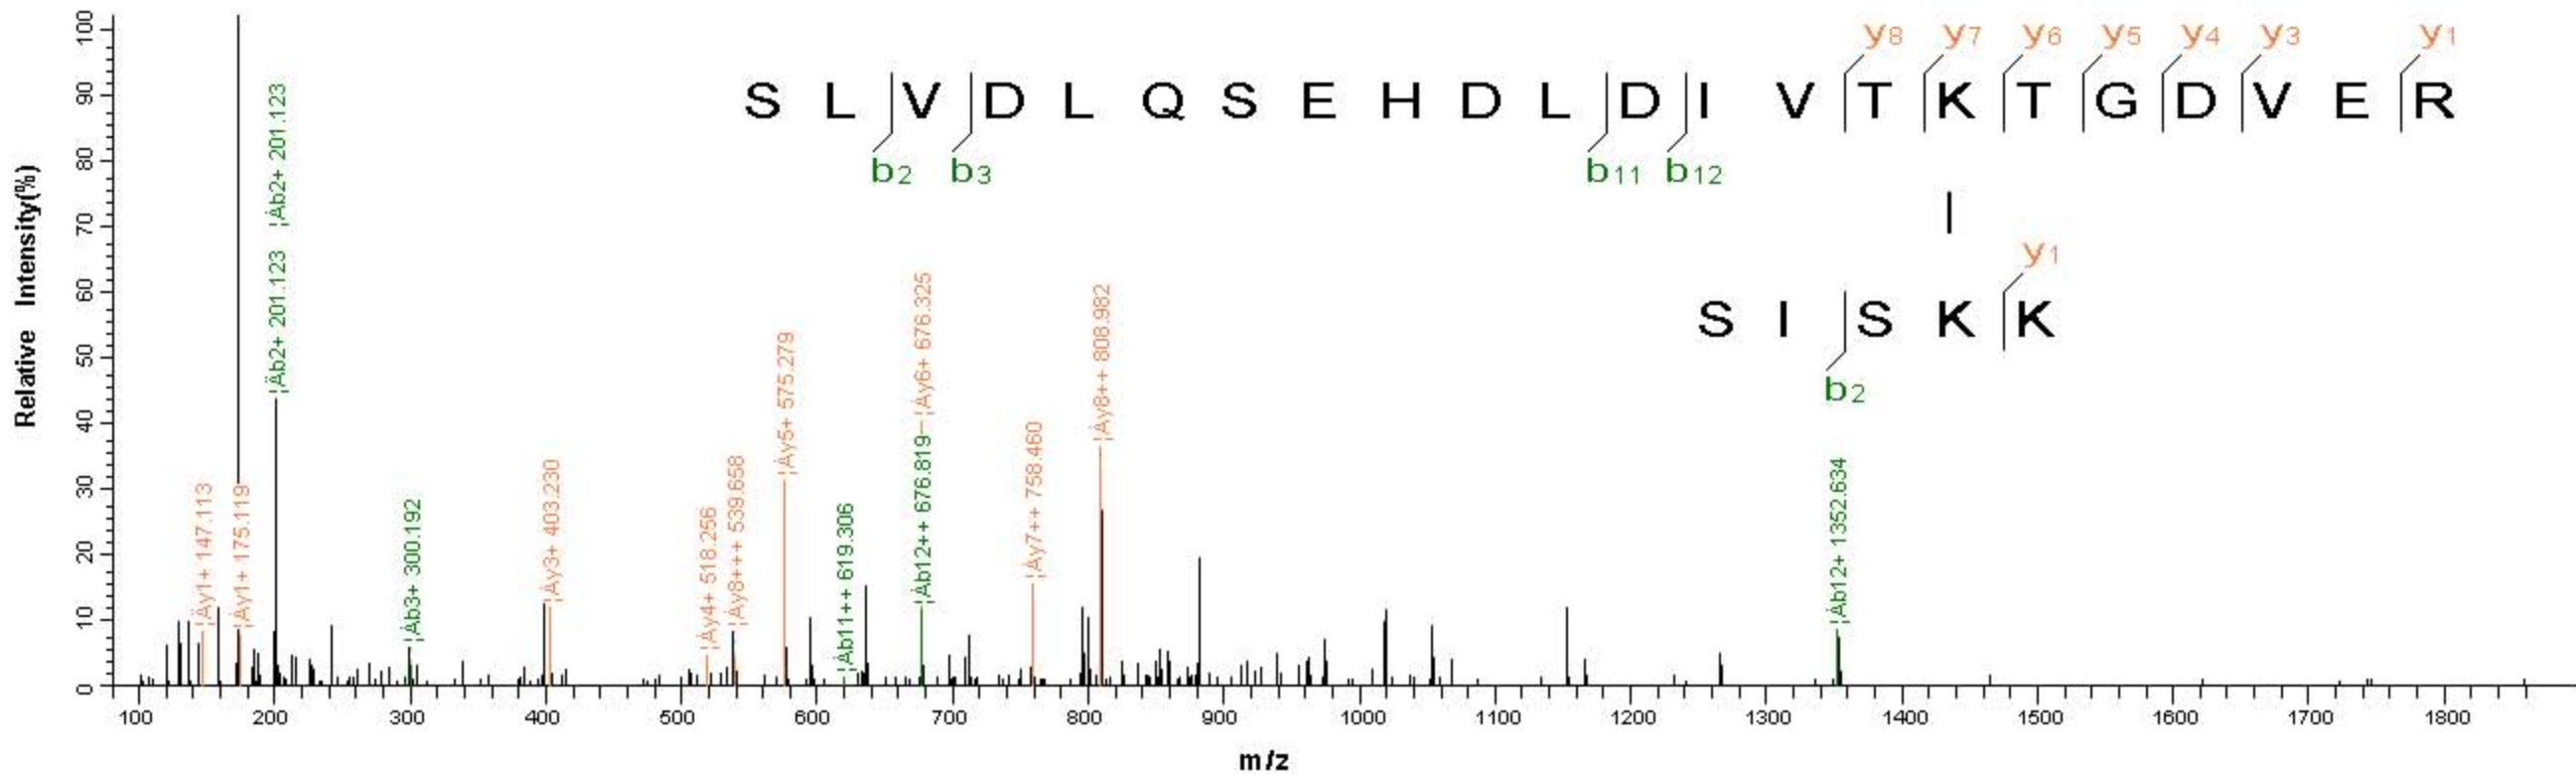

Charge: 5 MH+: 3007.6216 Score: 1.07e-001

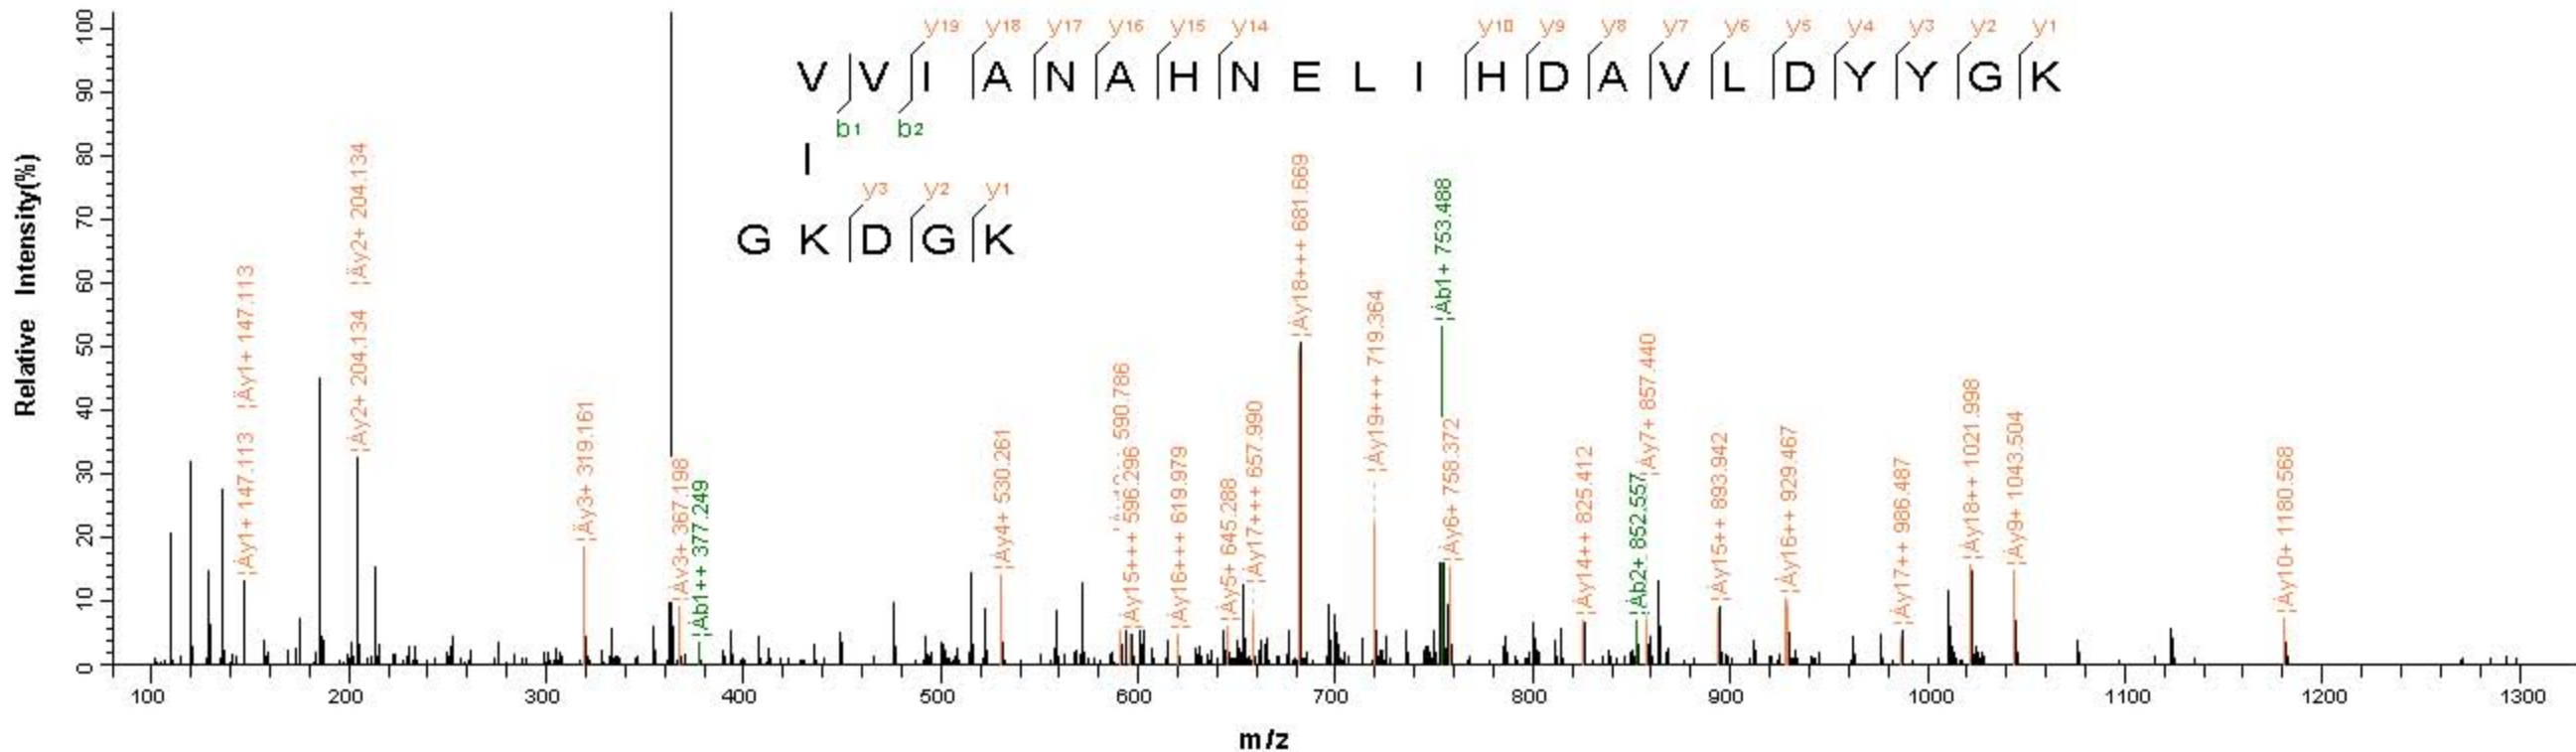

Charge: 5 MH+: 3172.7669 Score: 7.00e-001

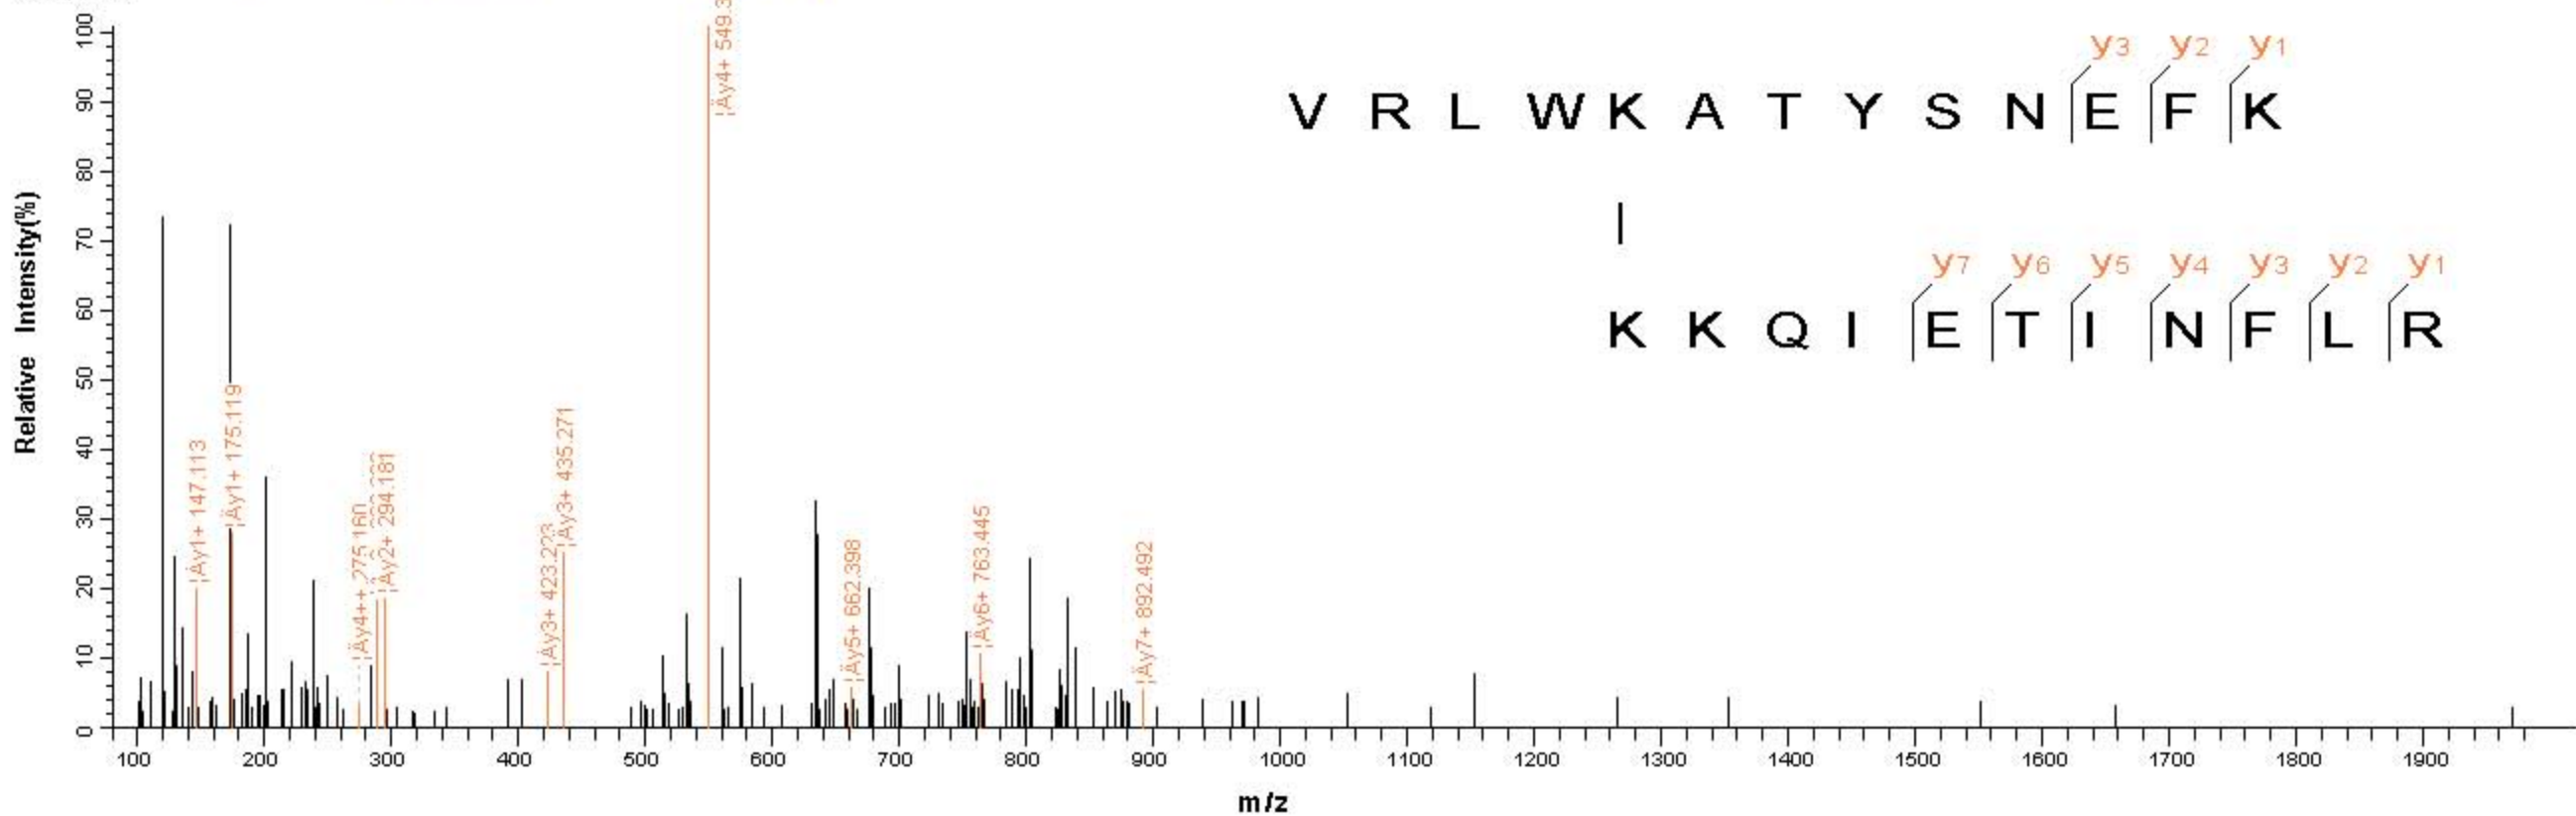

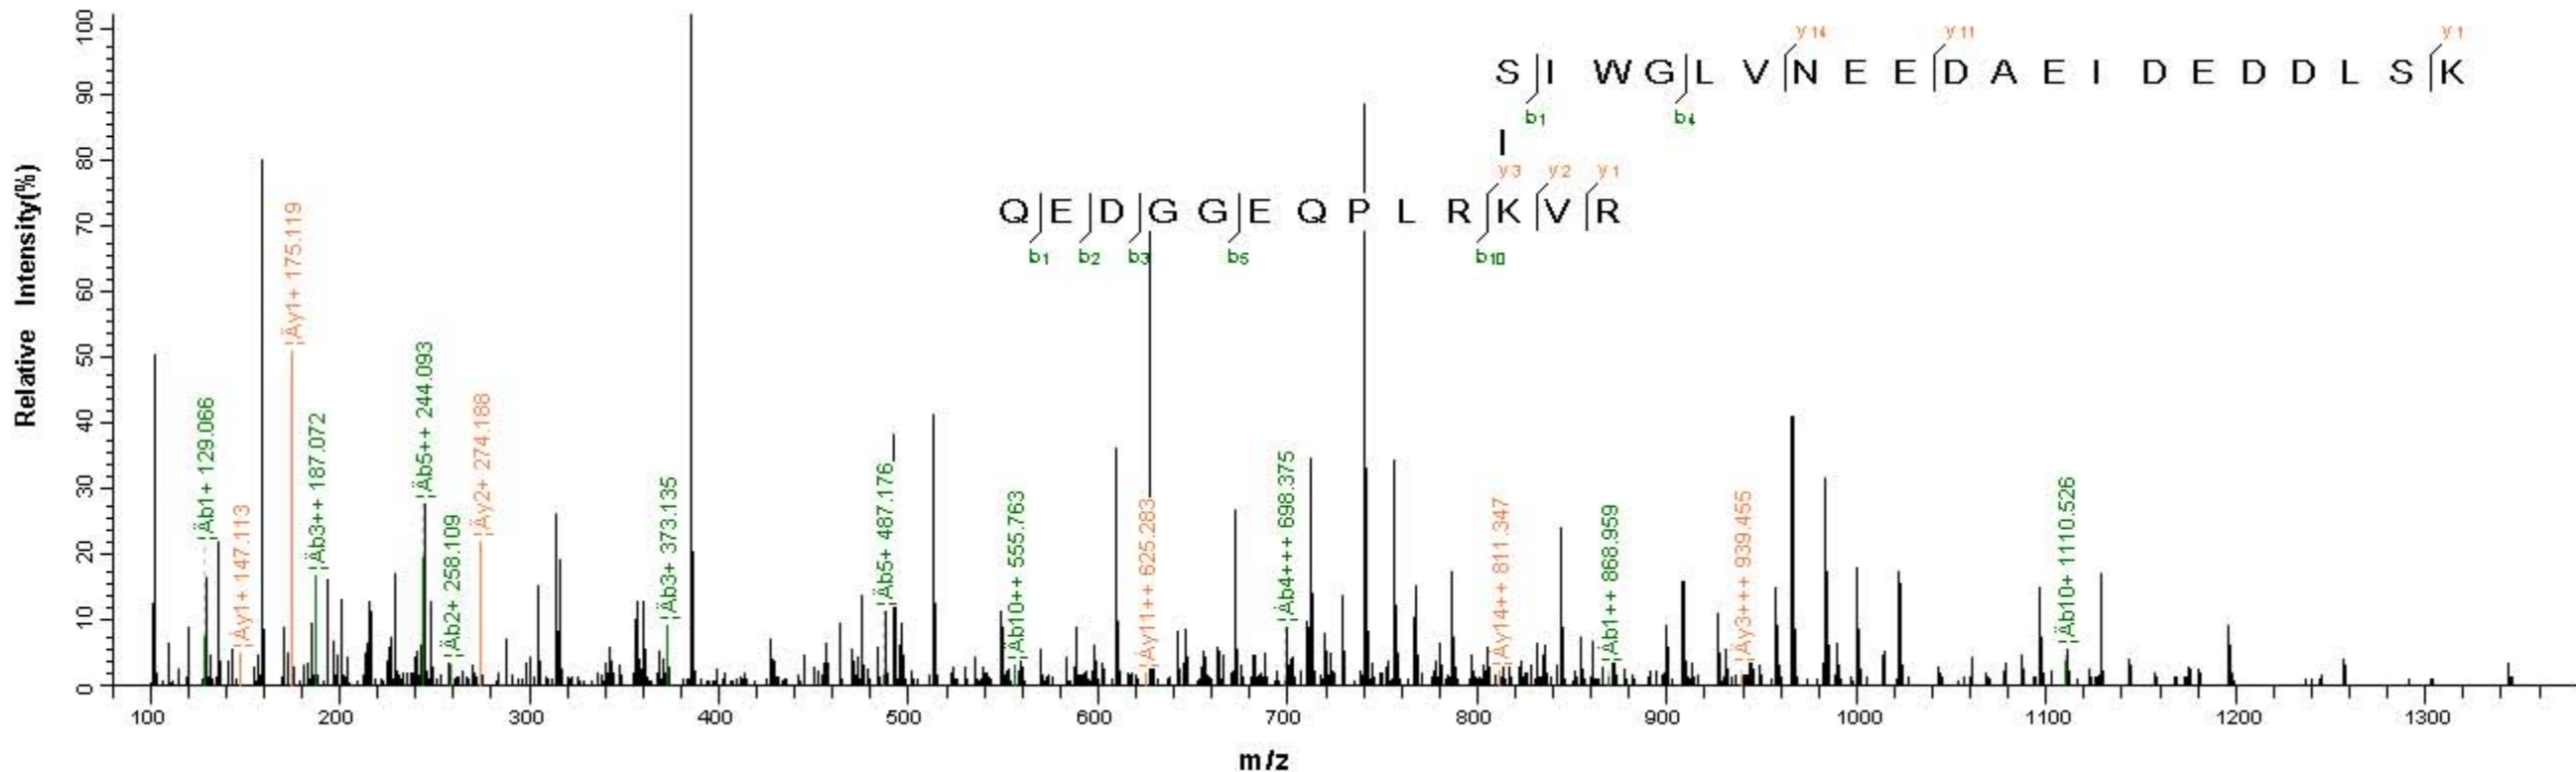



Charge: 4 MH+: 4042.9730 Score: 1.95e-002

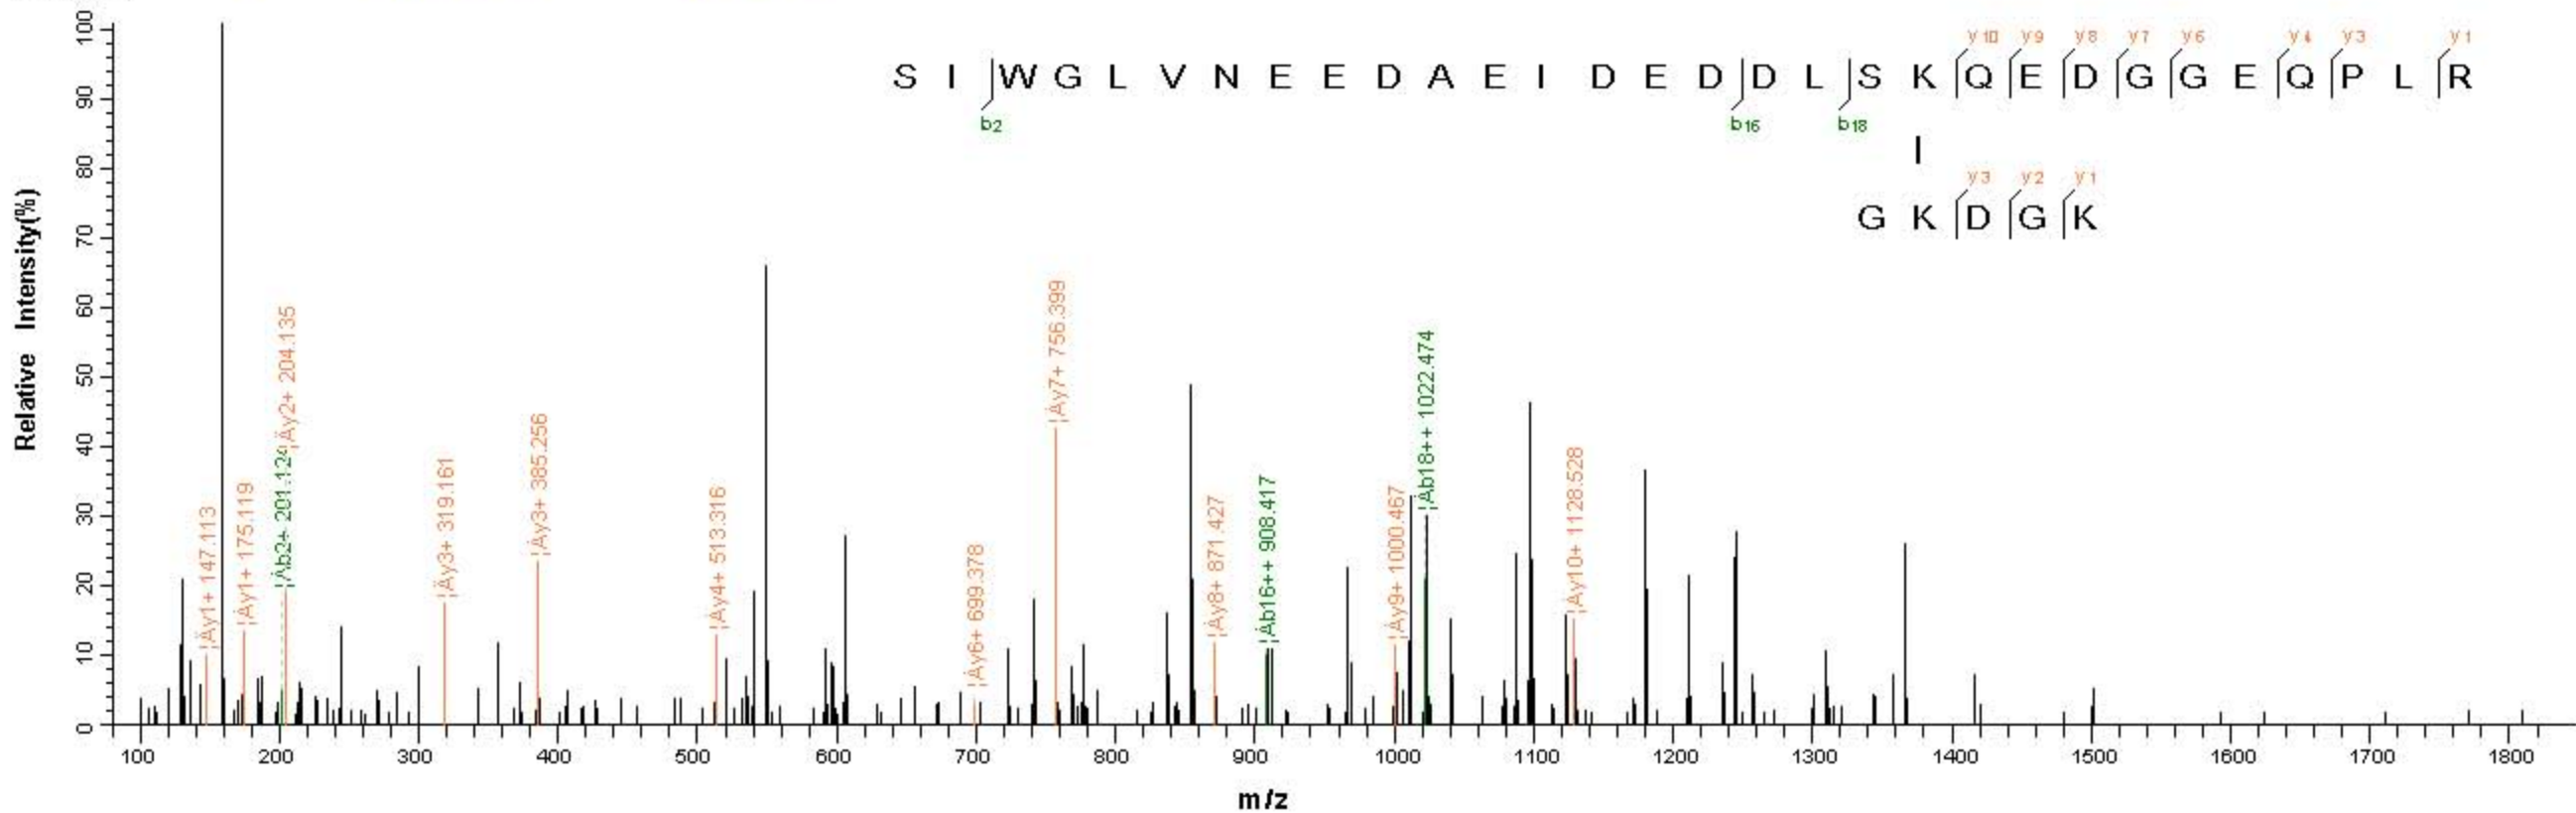

Charge: 4 MH+: 3413.8058 Score: 1.43e-004

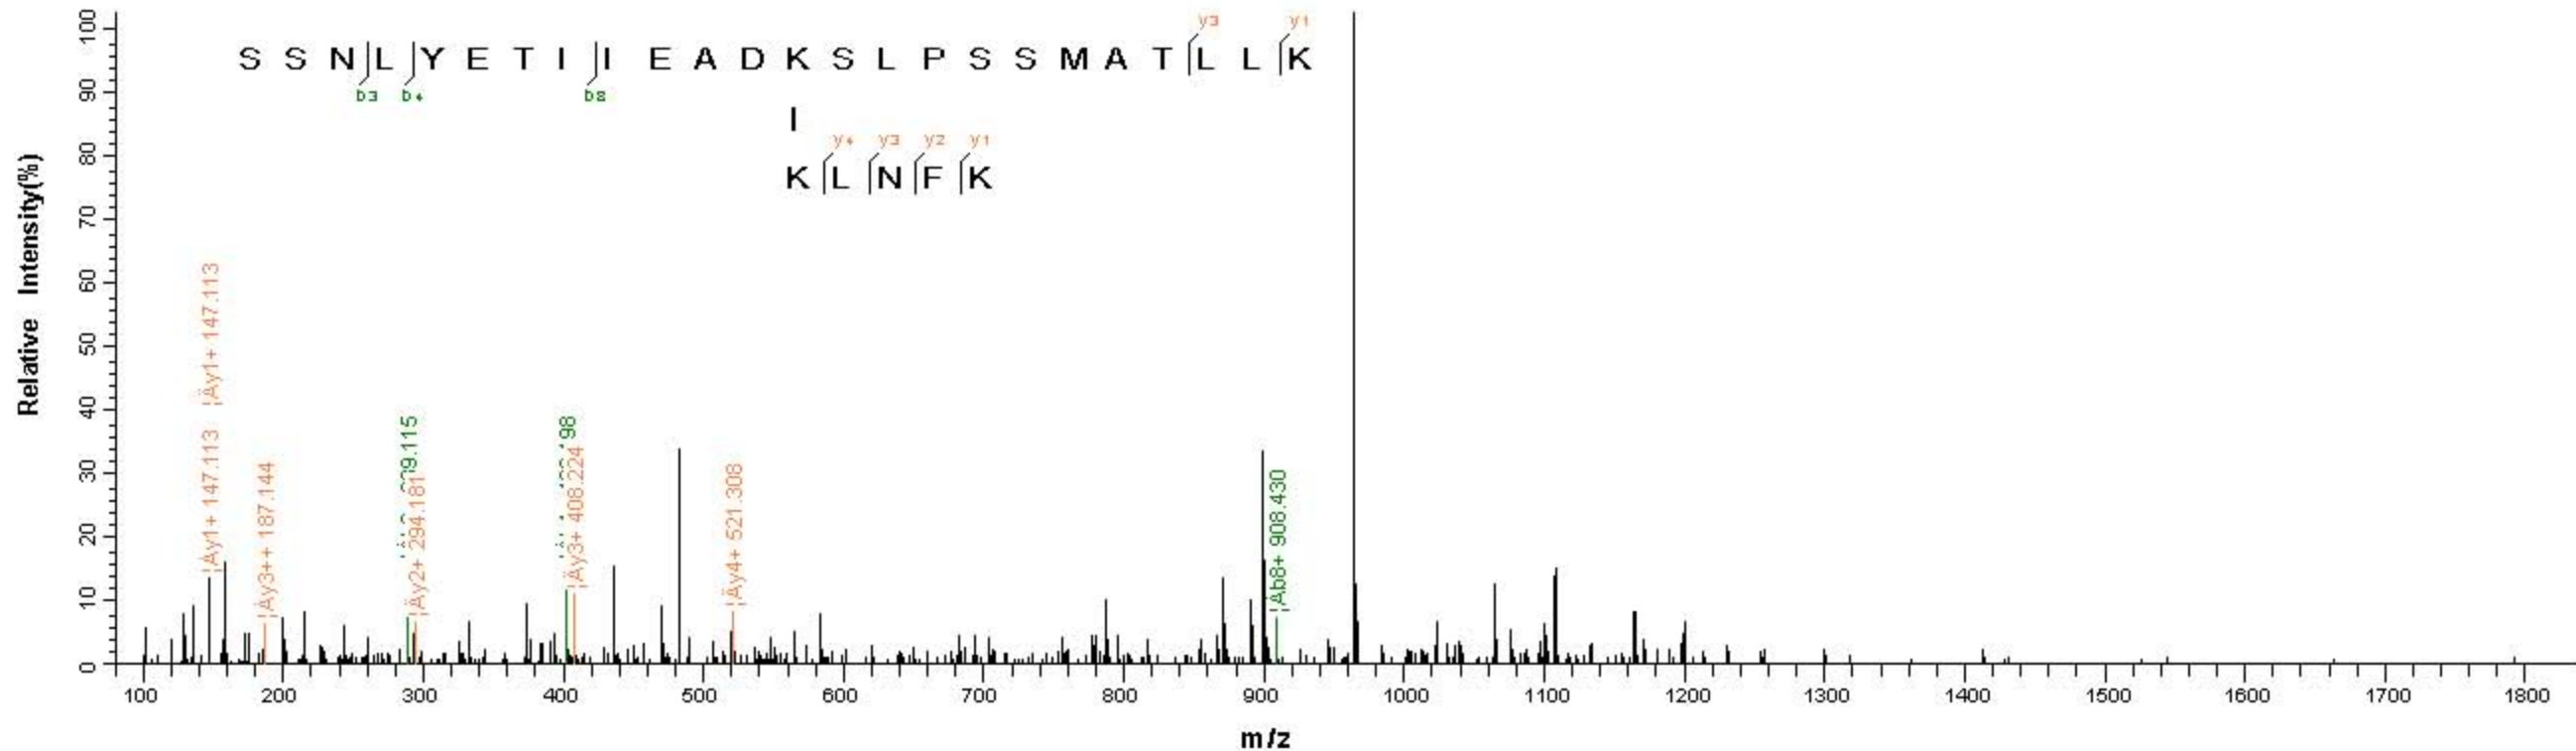

Charge: 4 MH+: 2740.5255 Score: 1.20e-001

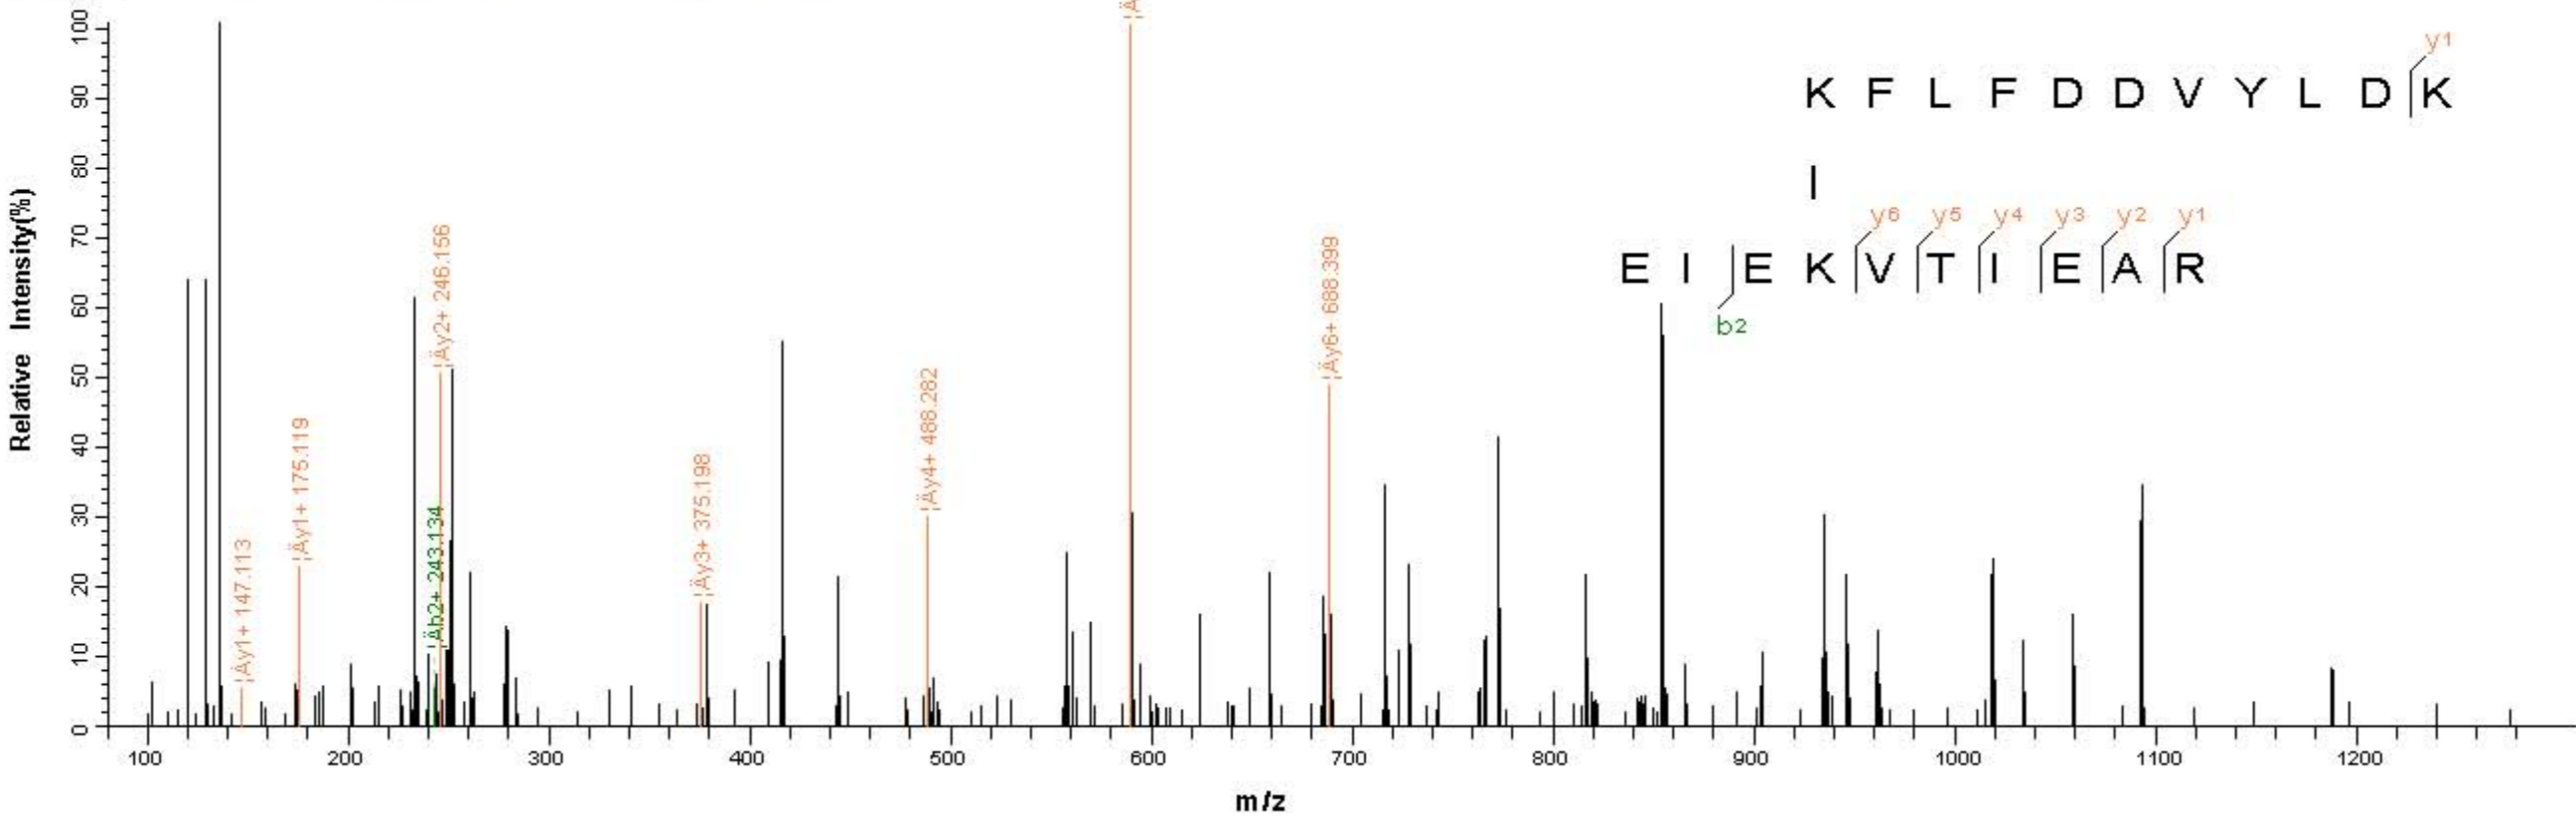

Charge: 5 MH+: 4308.3149 Score: 8.98e-002

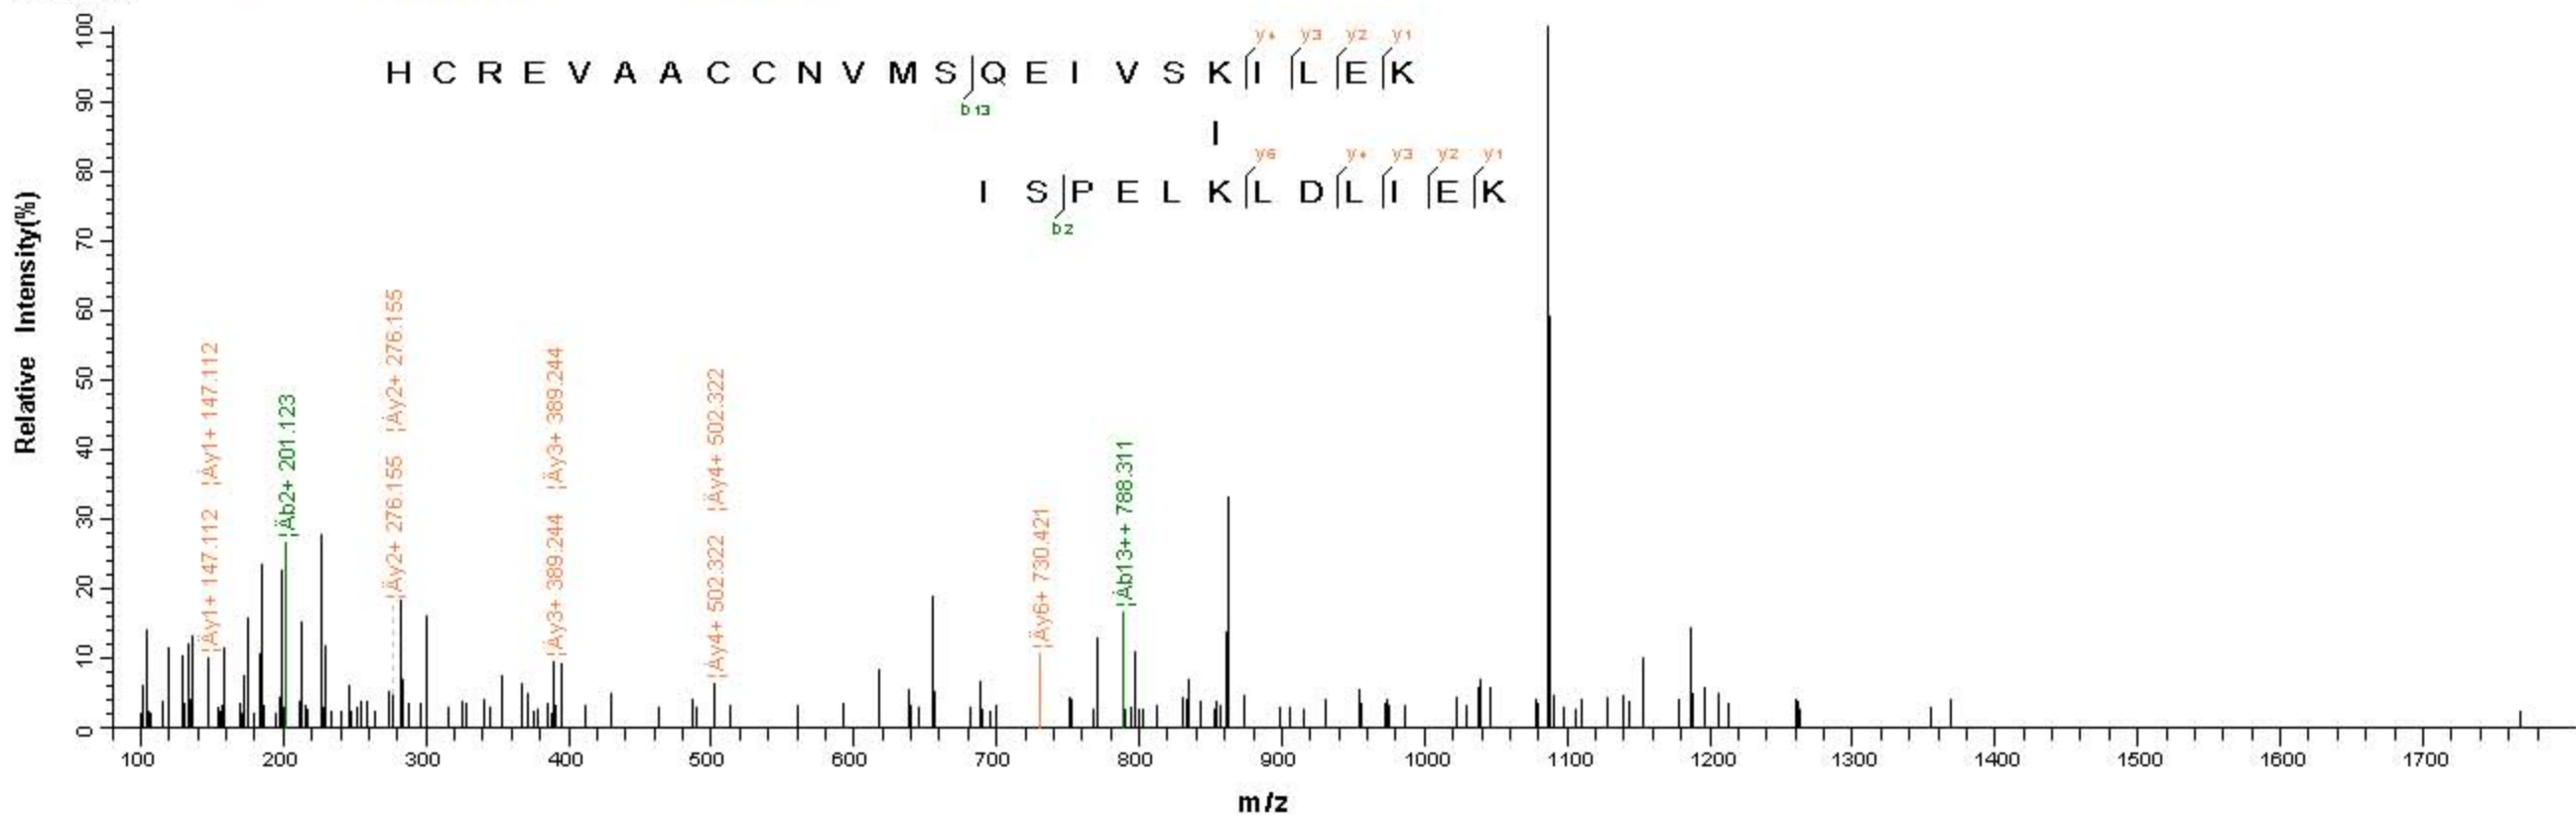

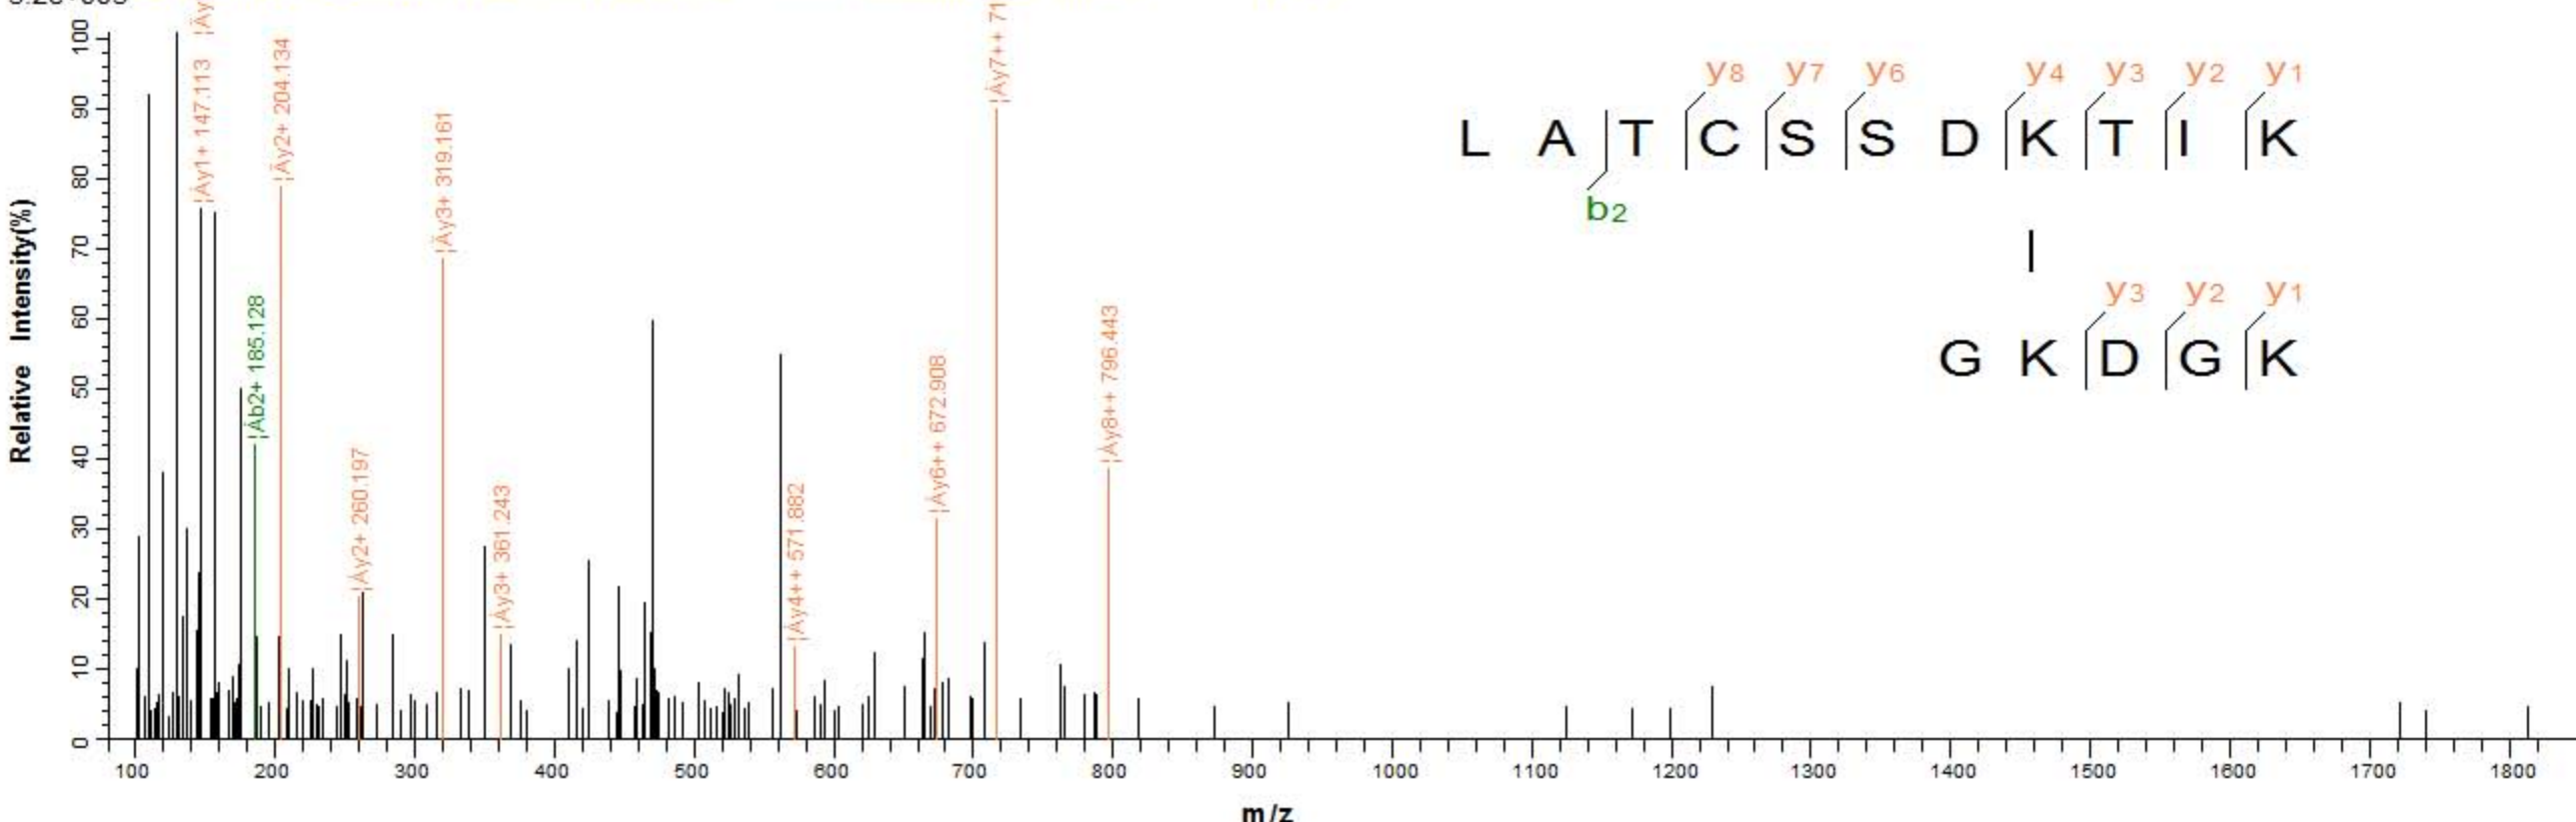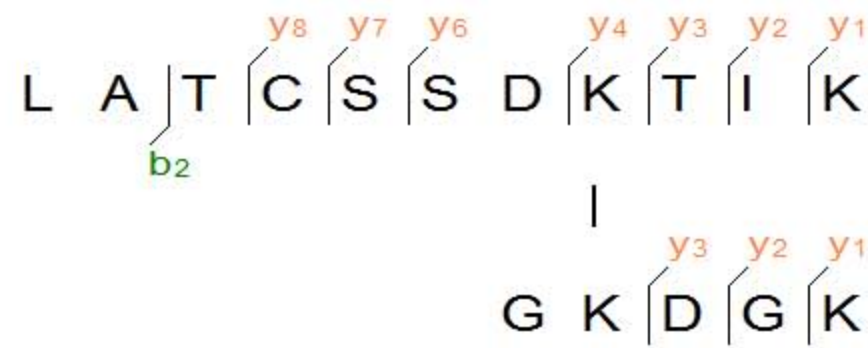

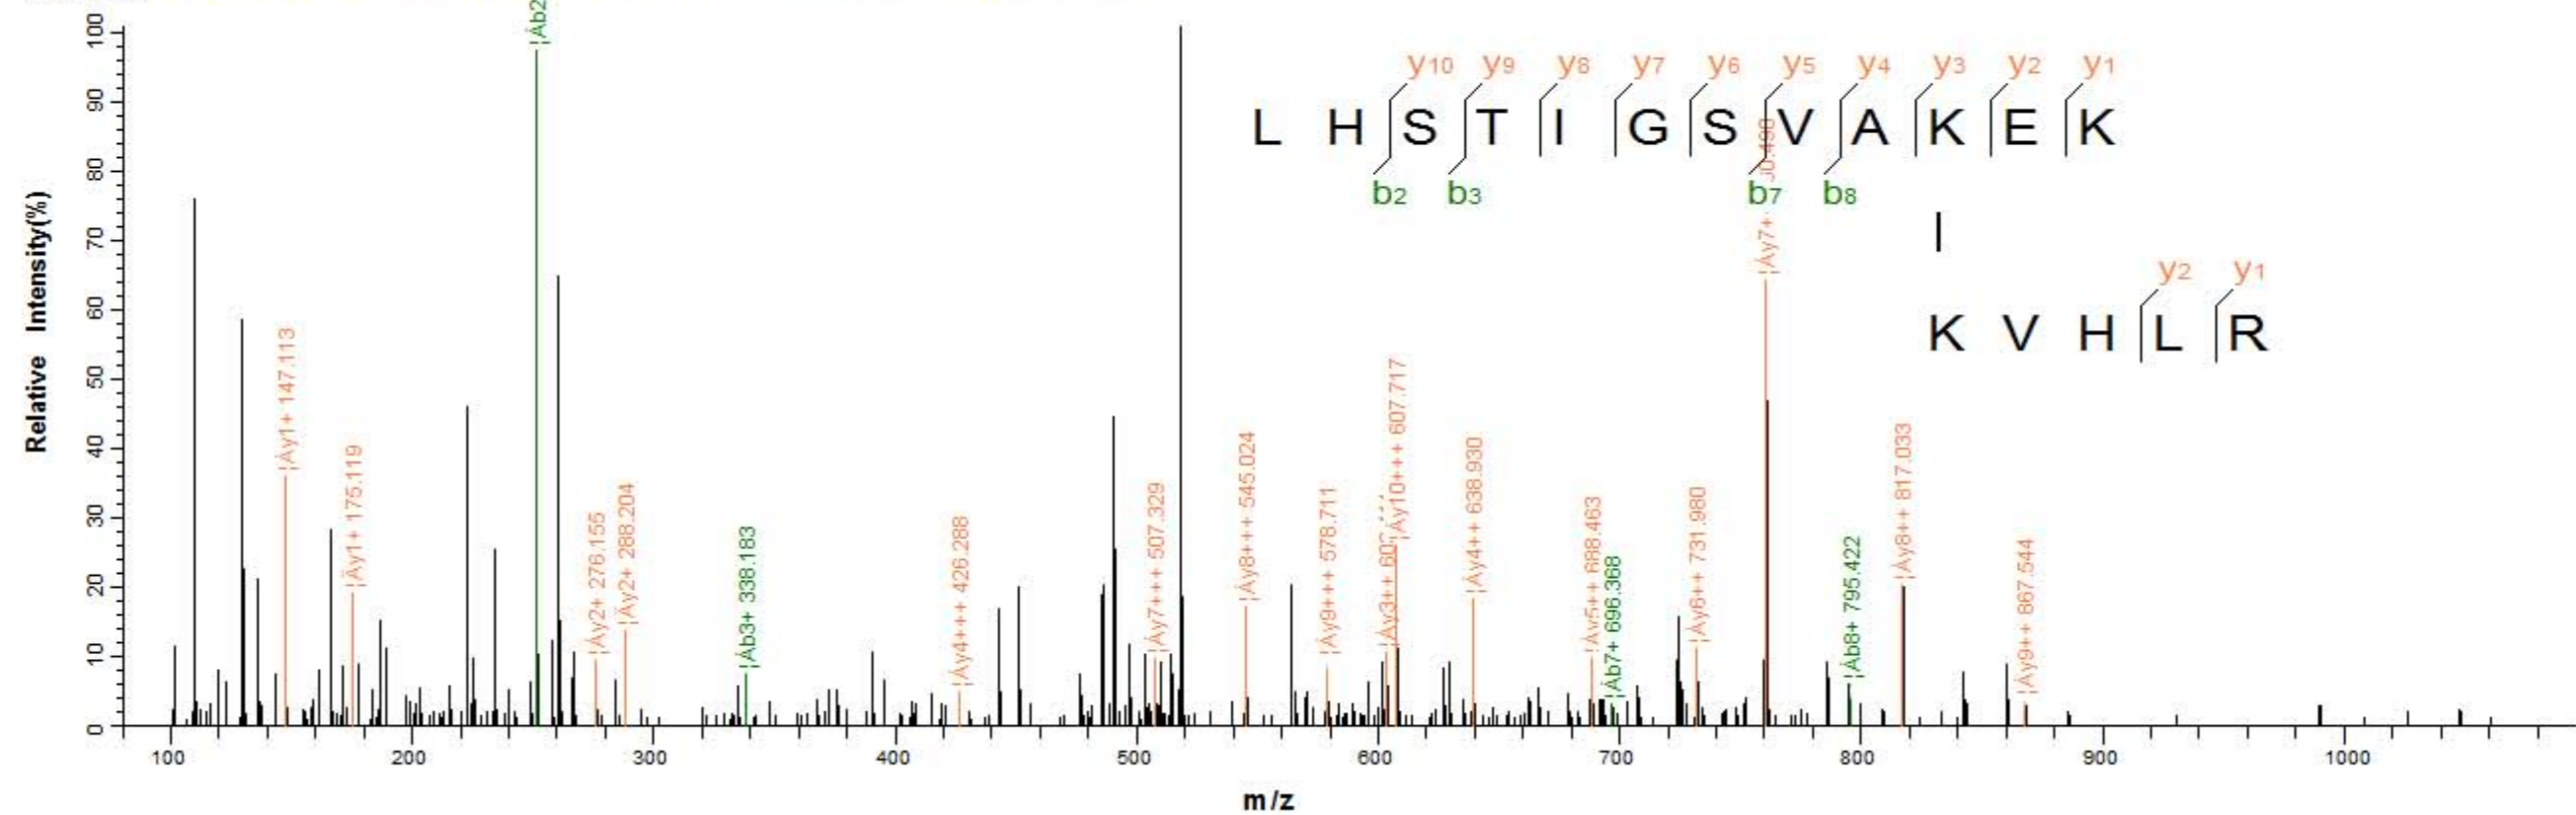

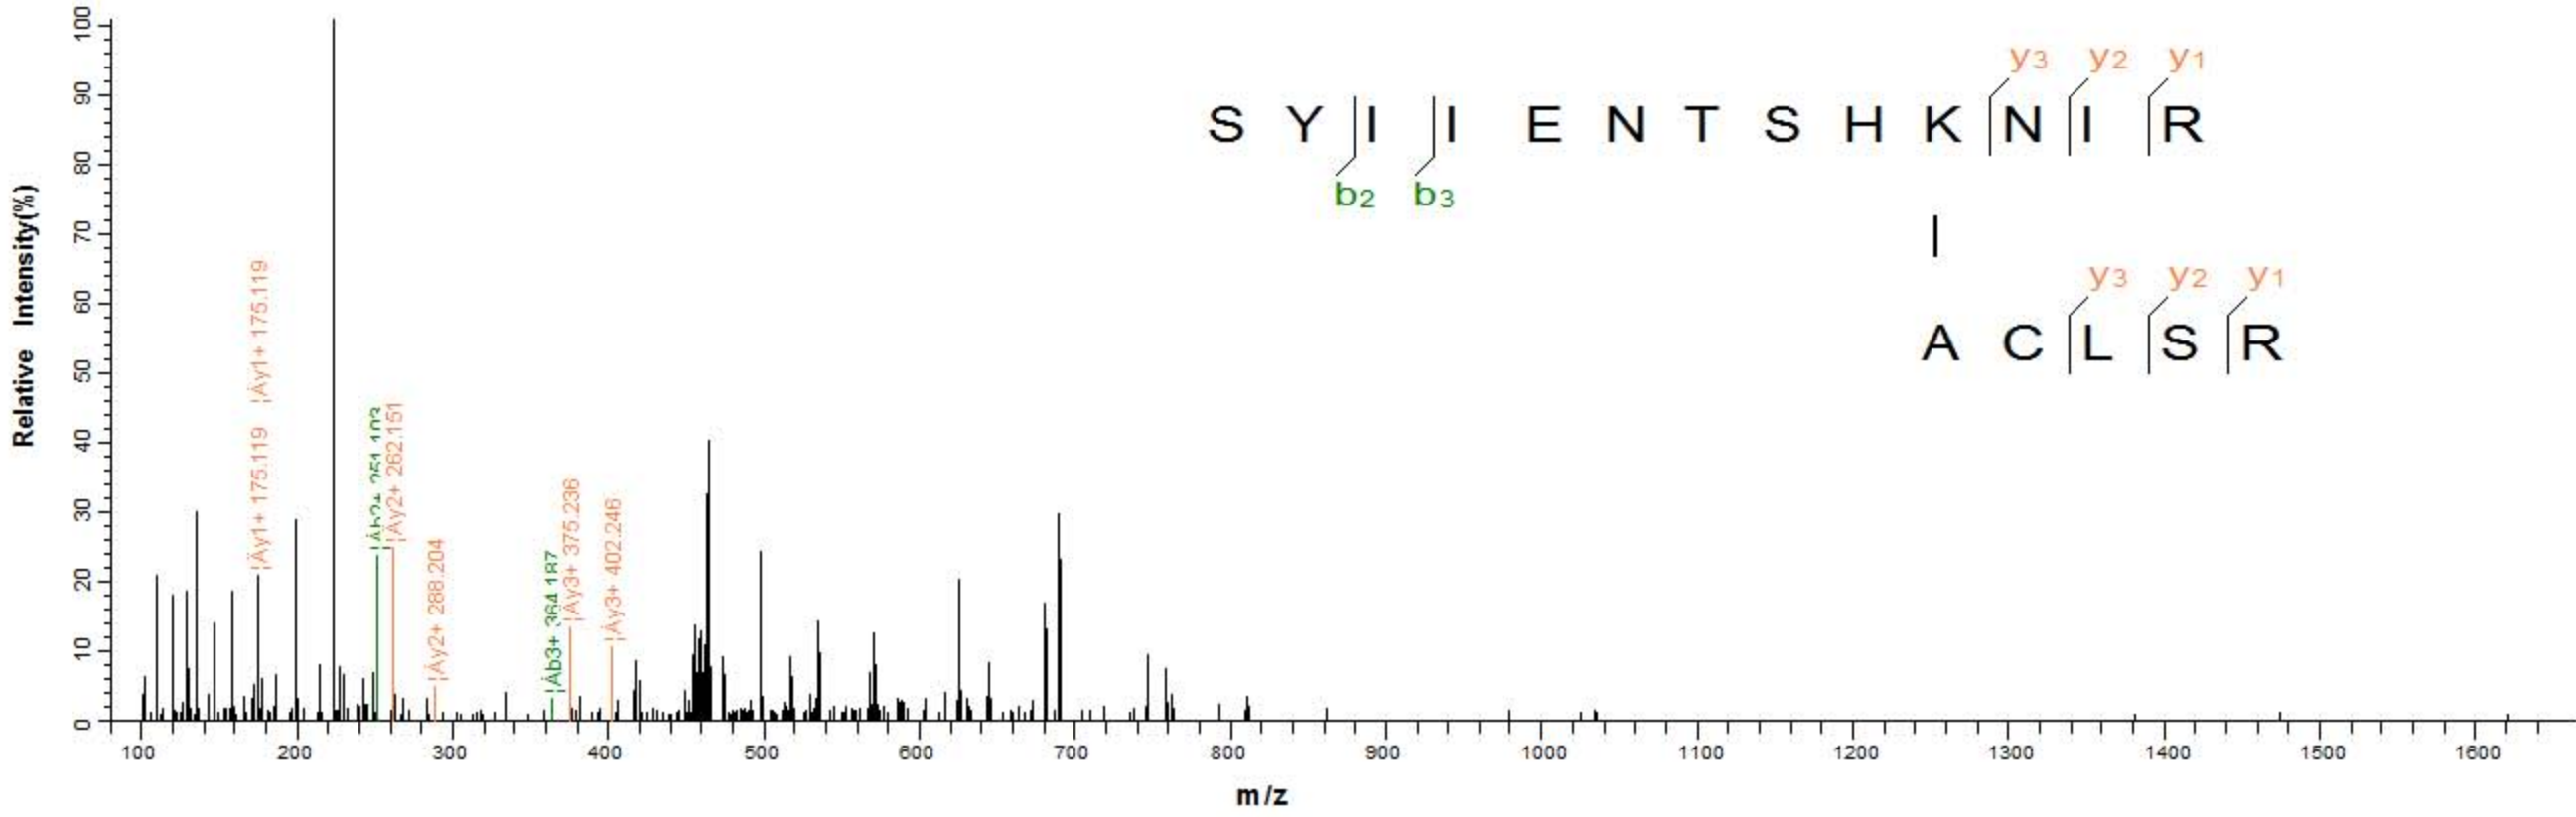

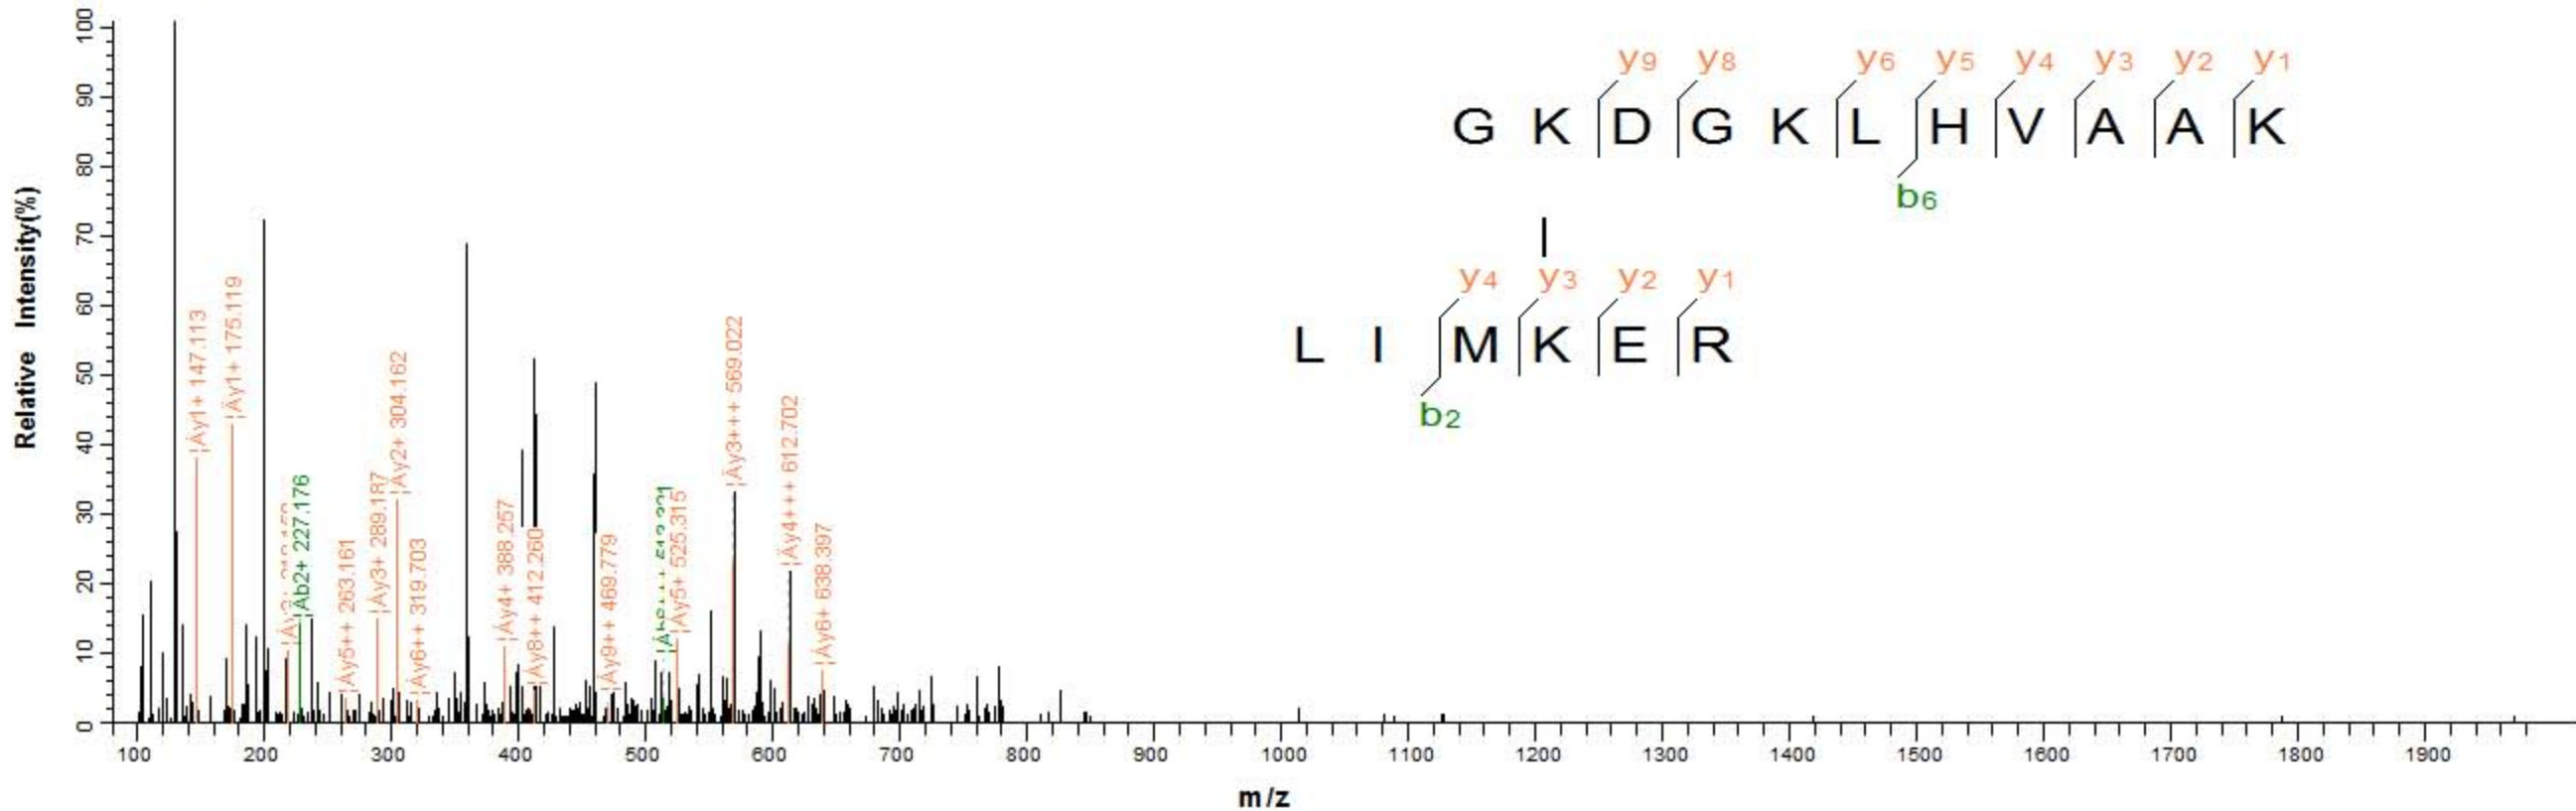



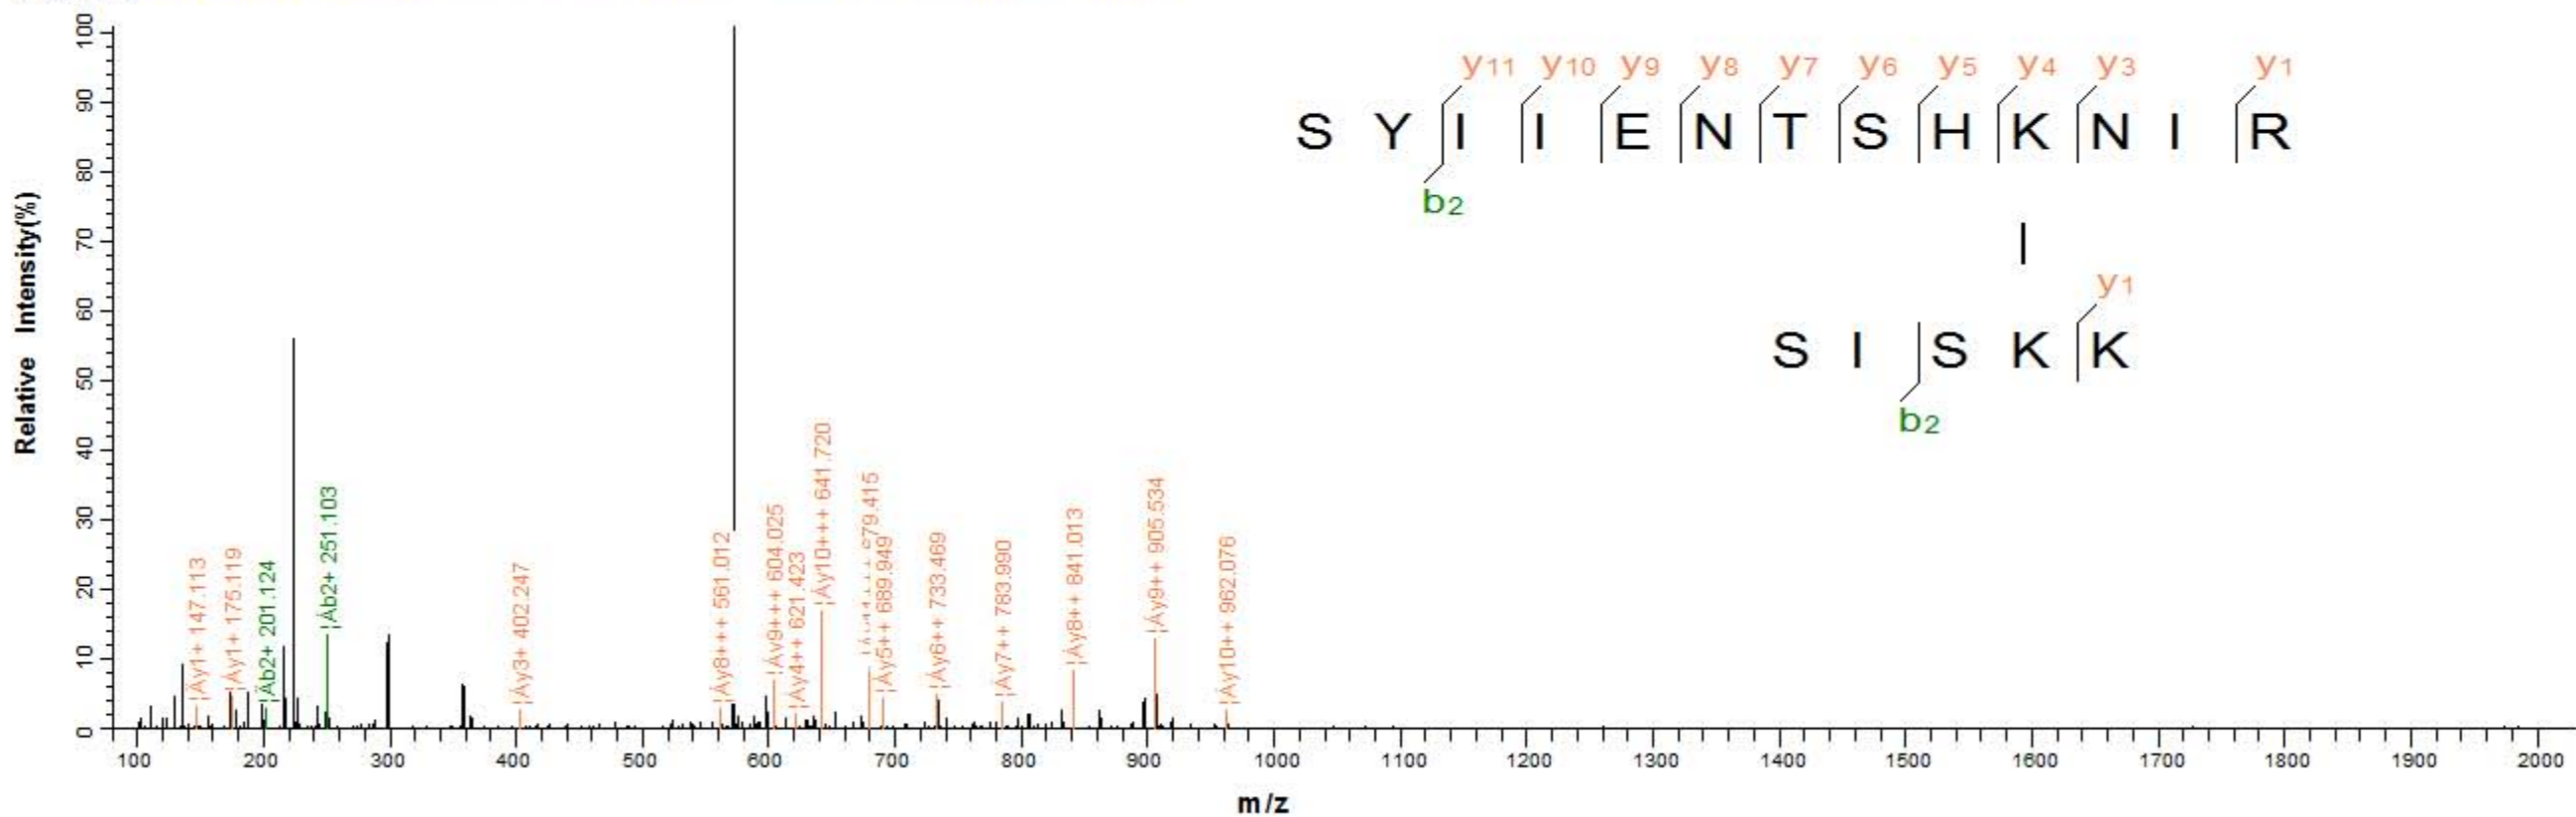

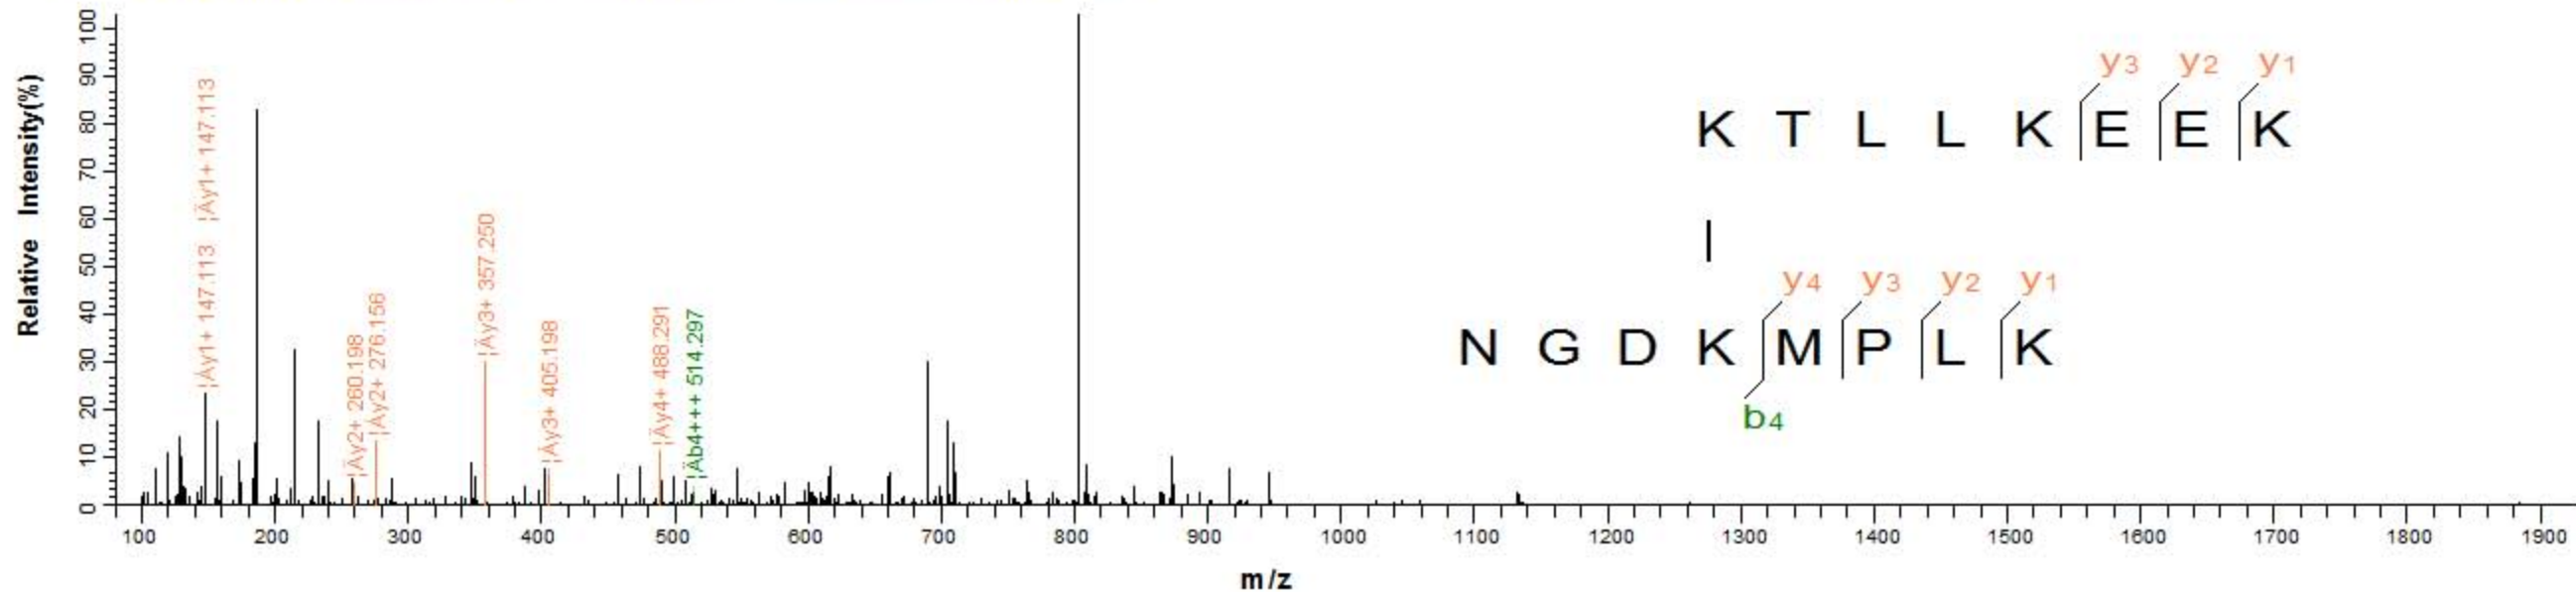

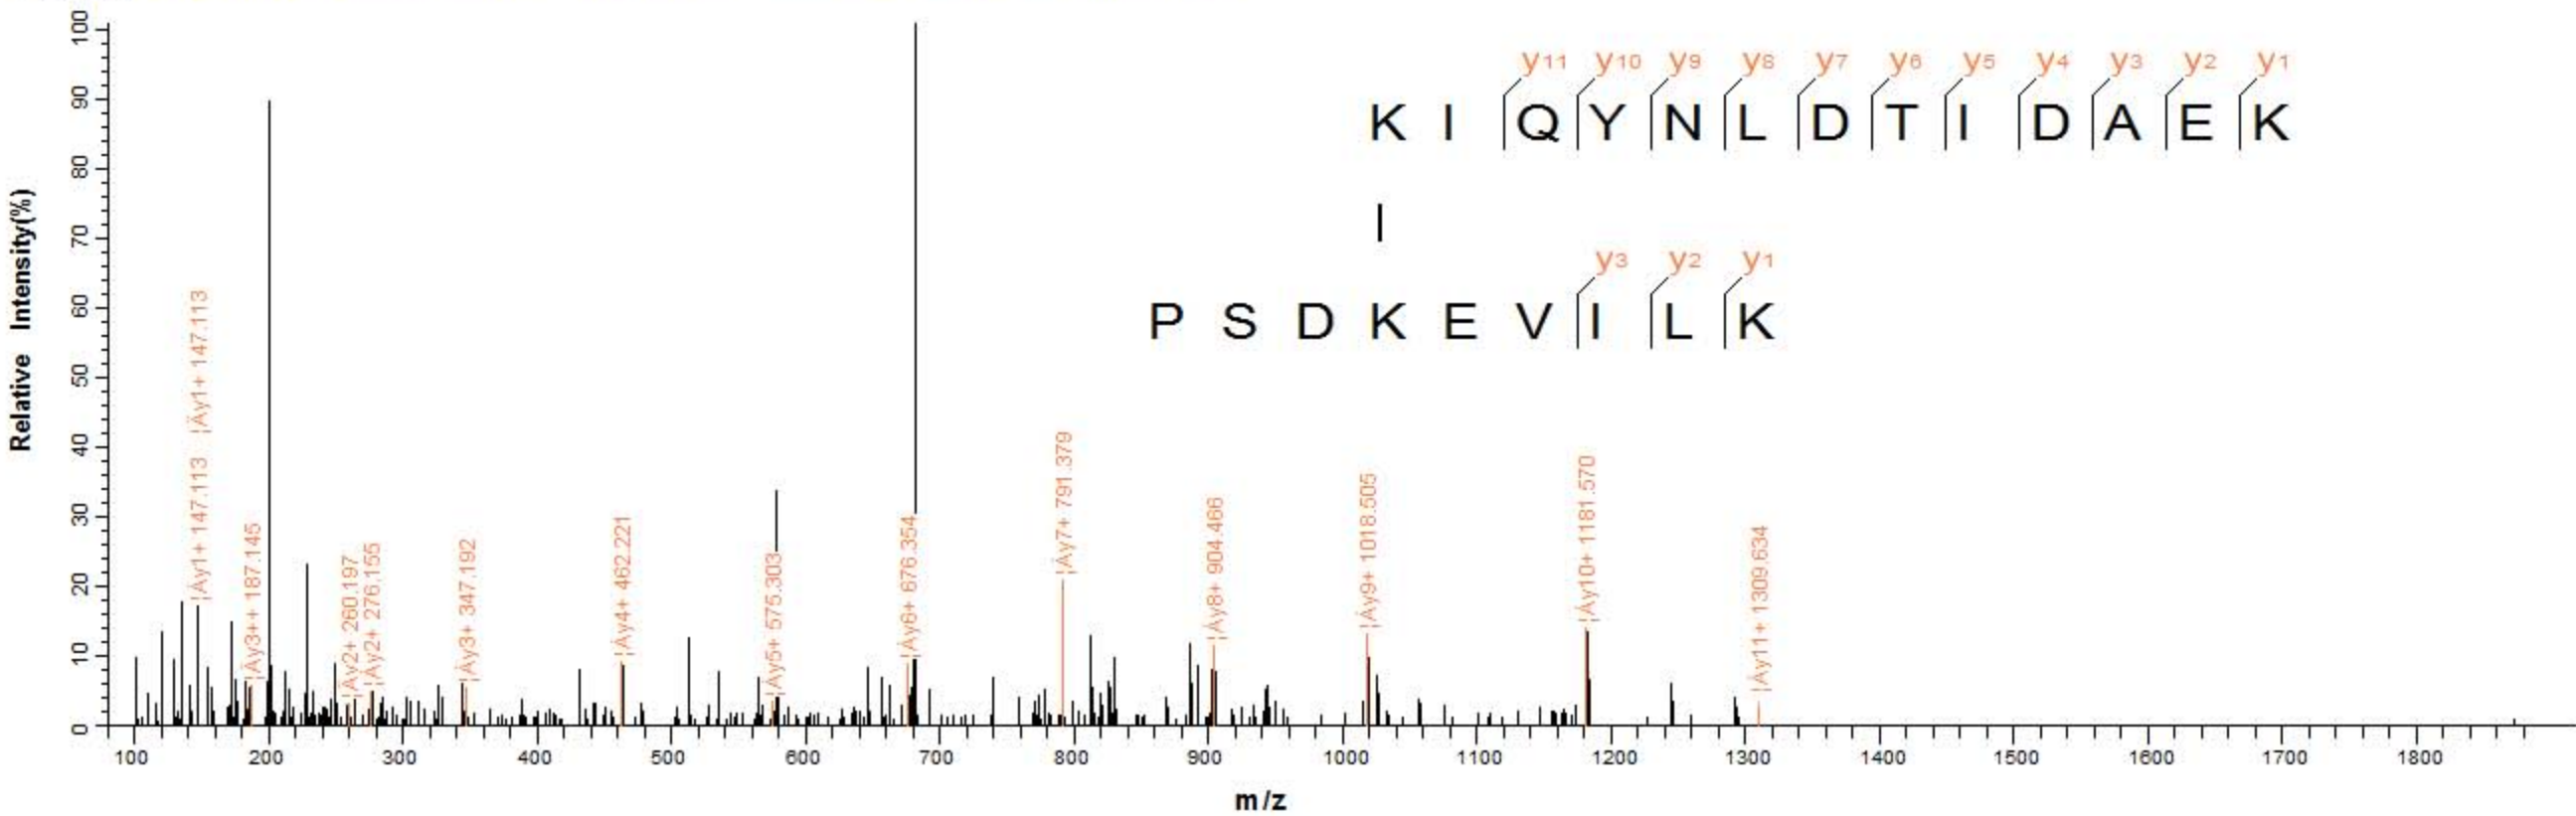

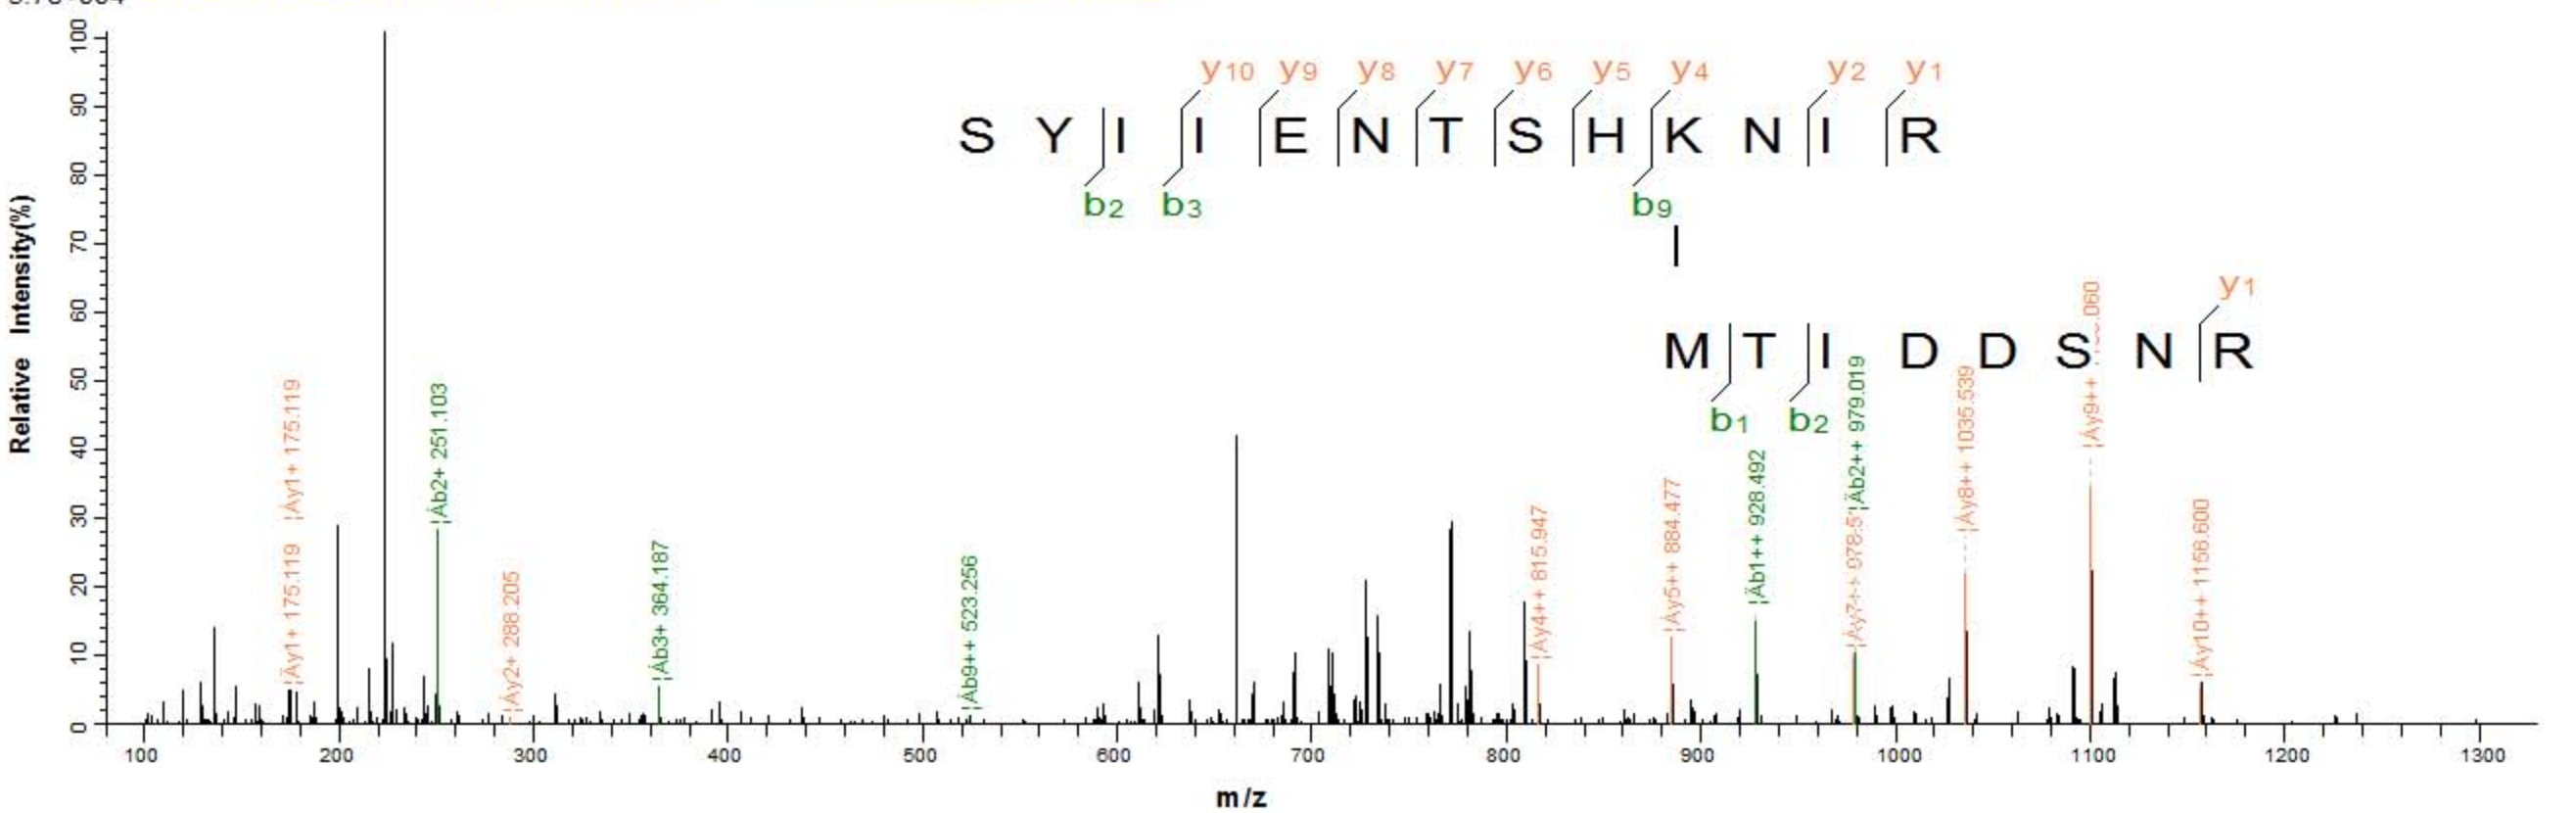

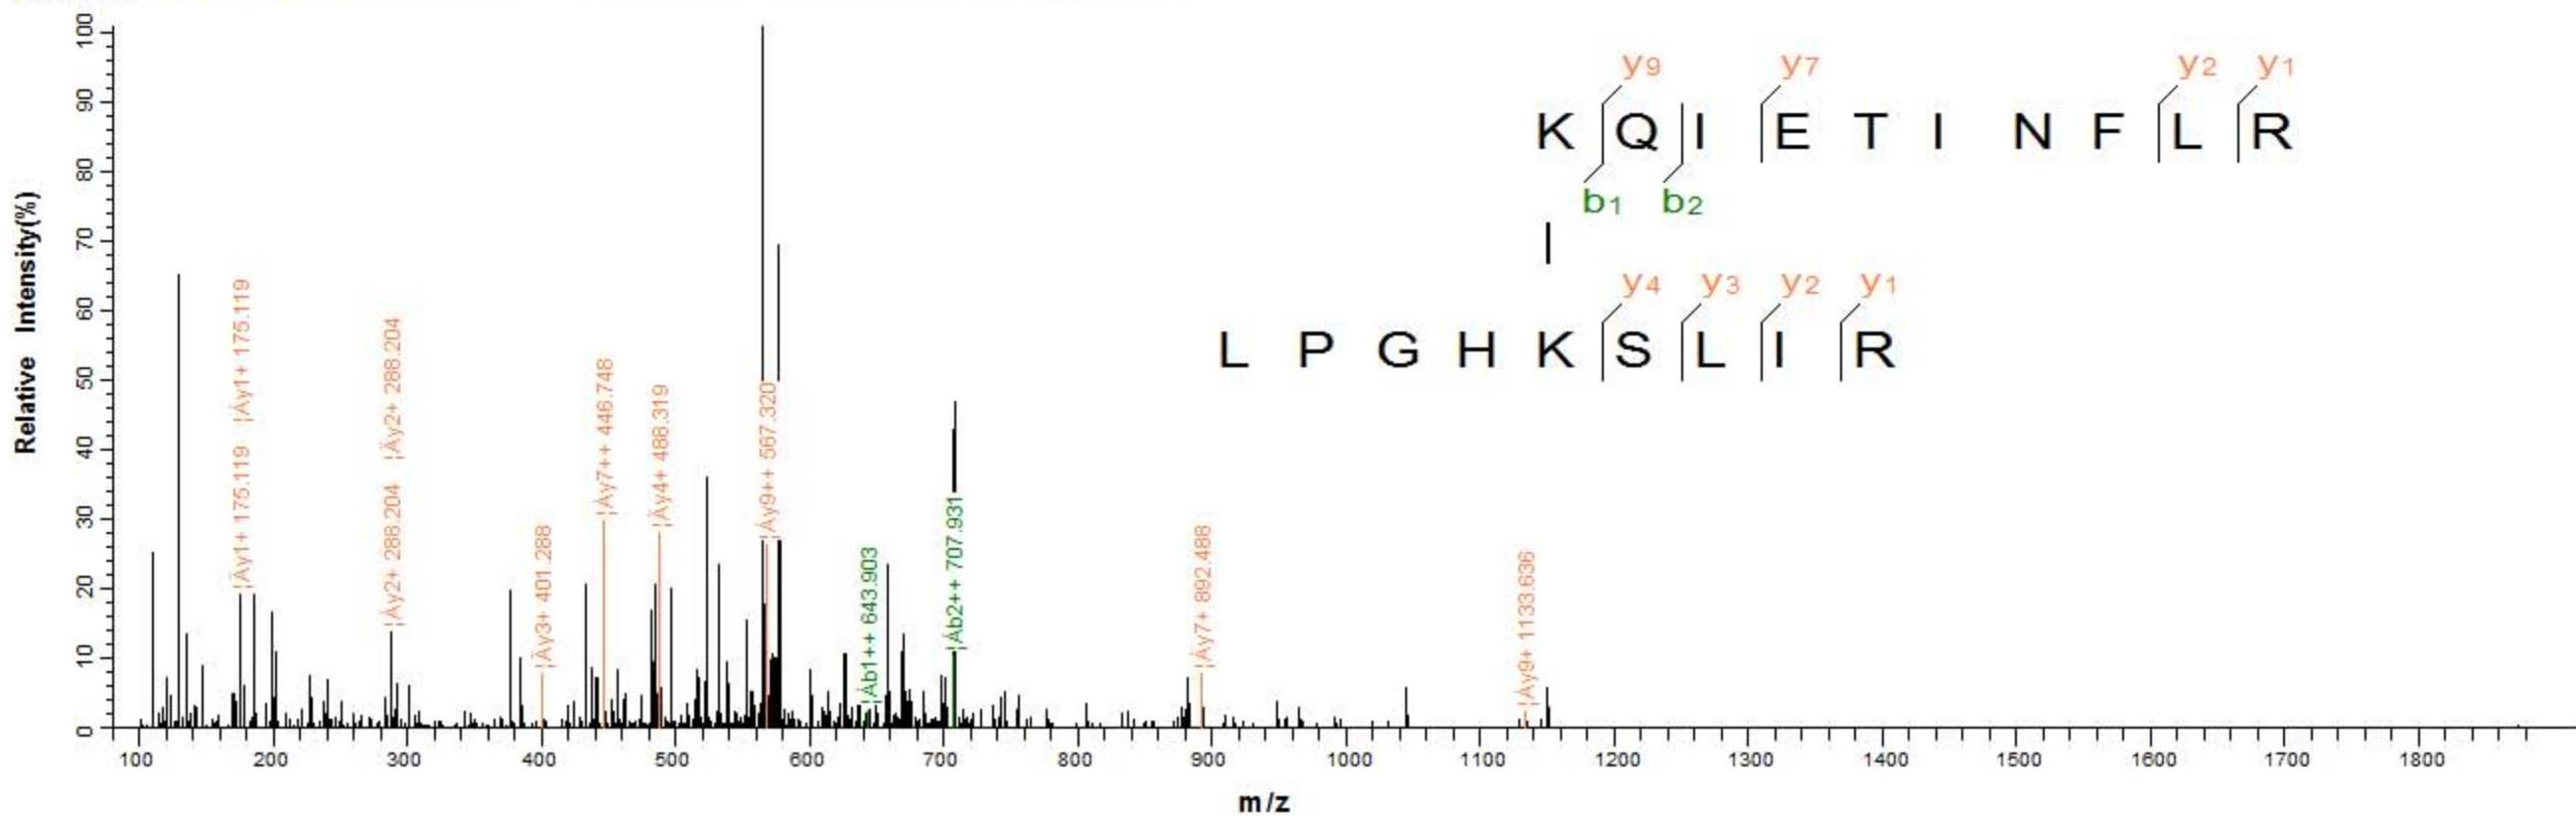

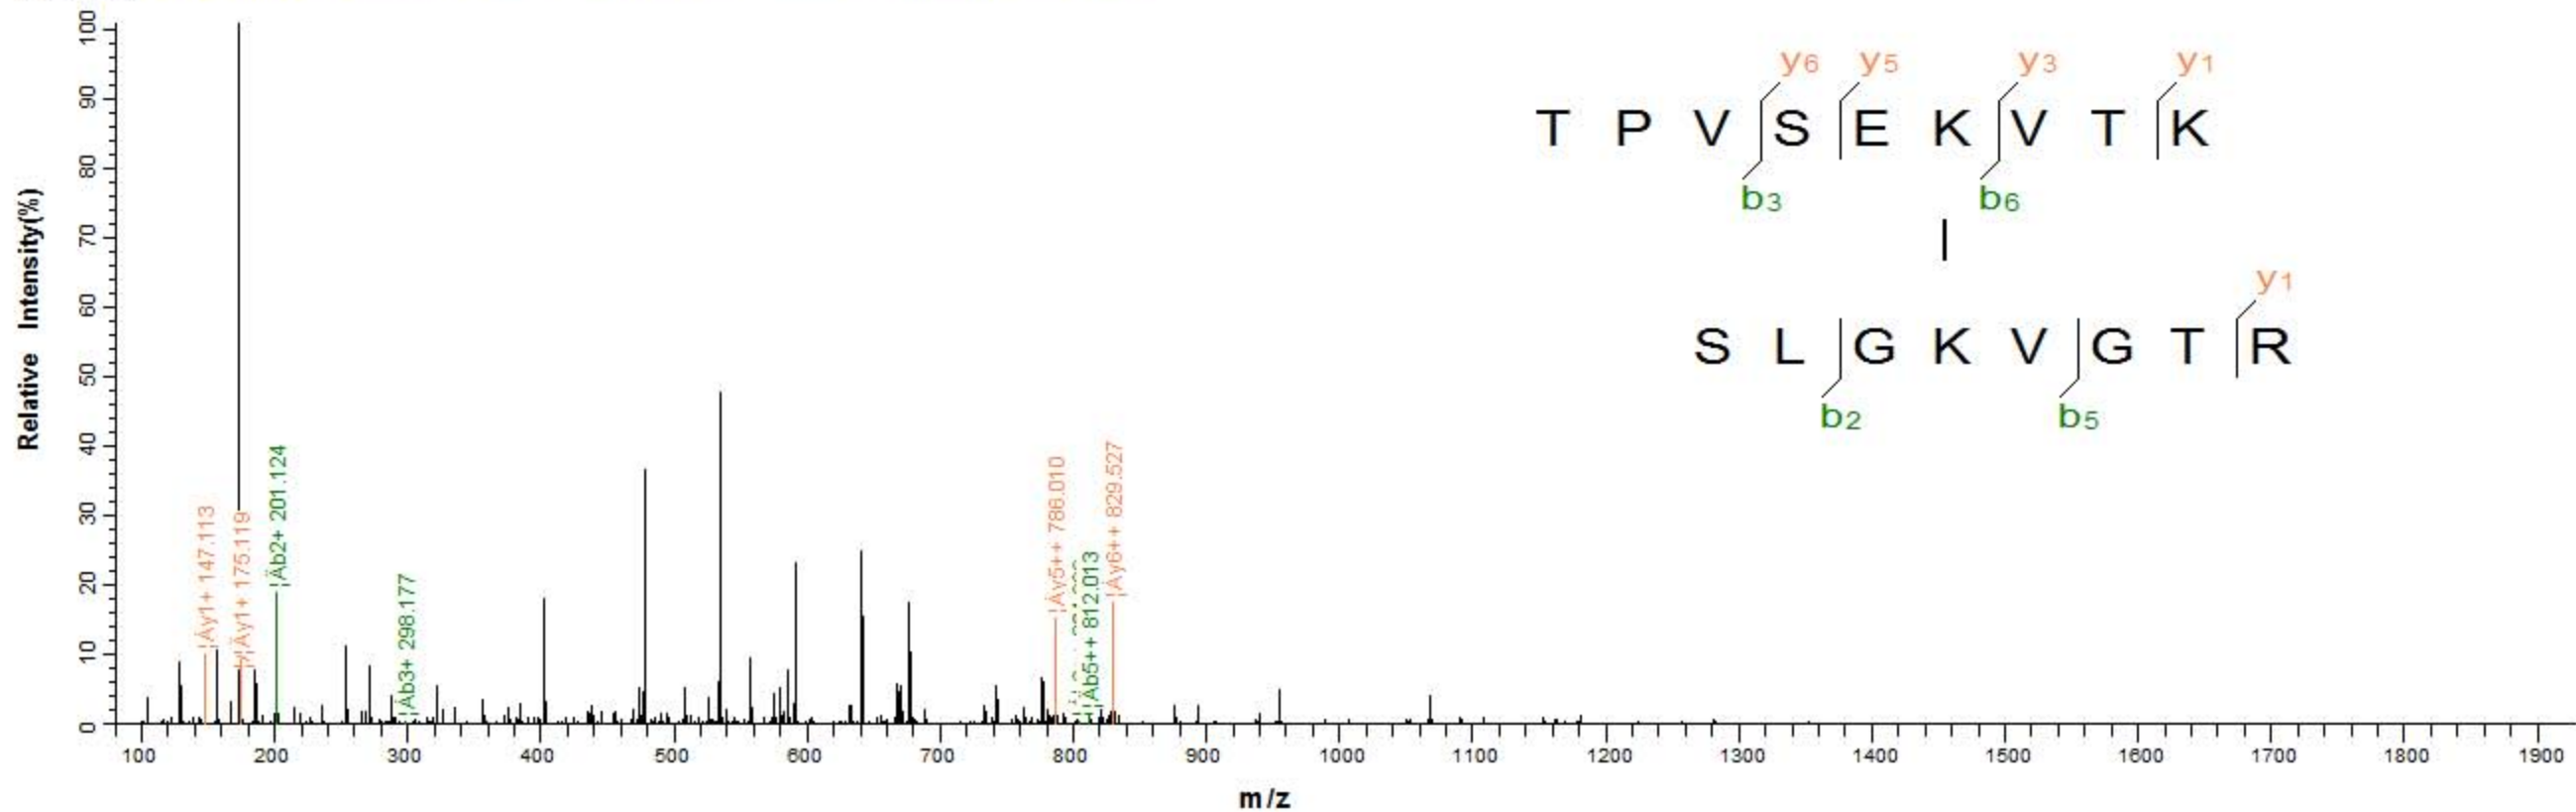

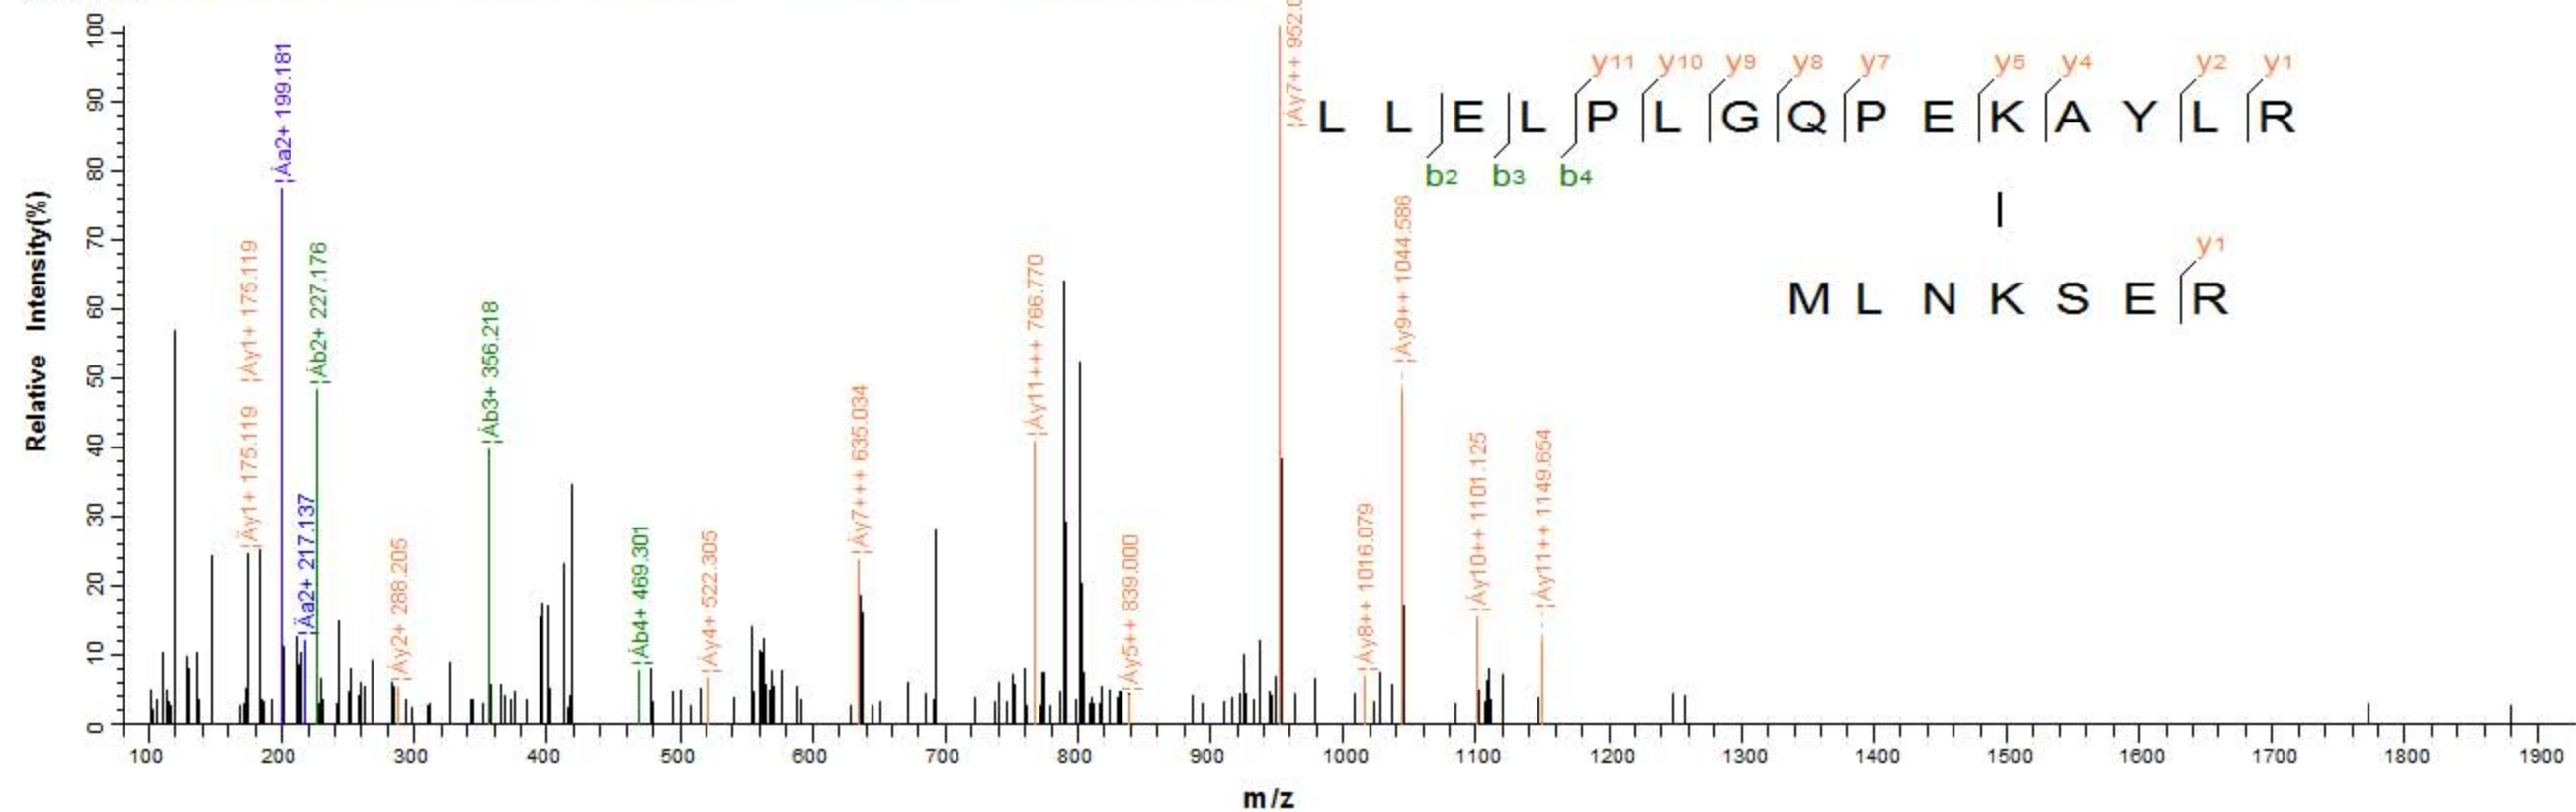

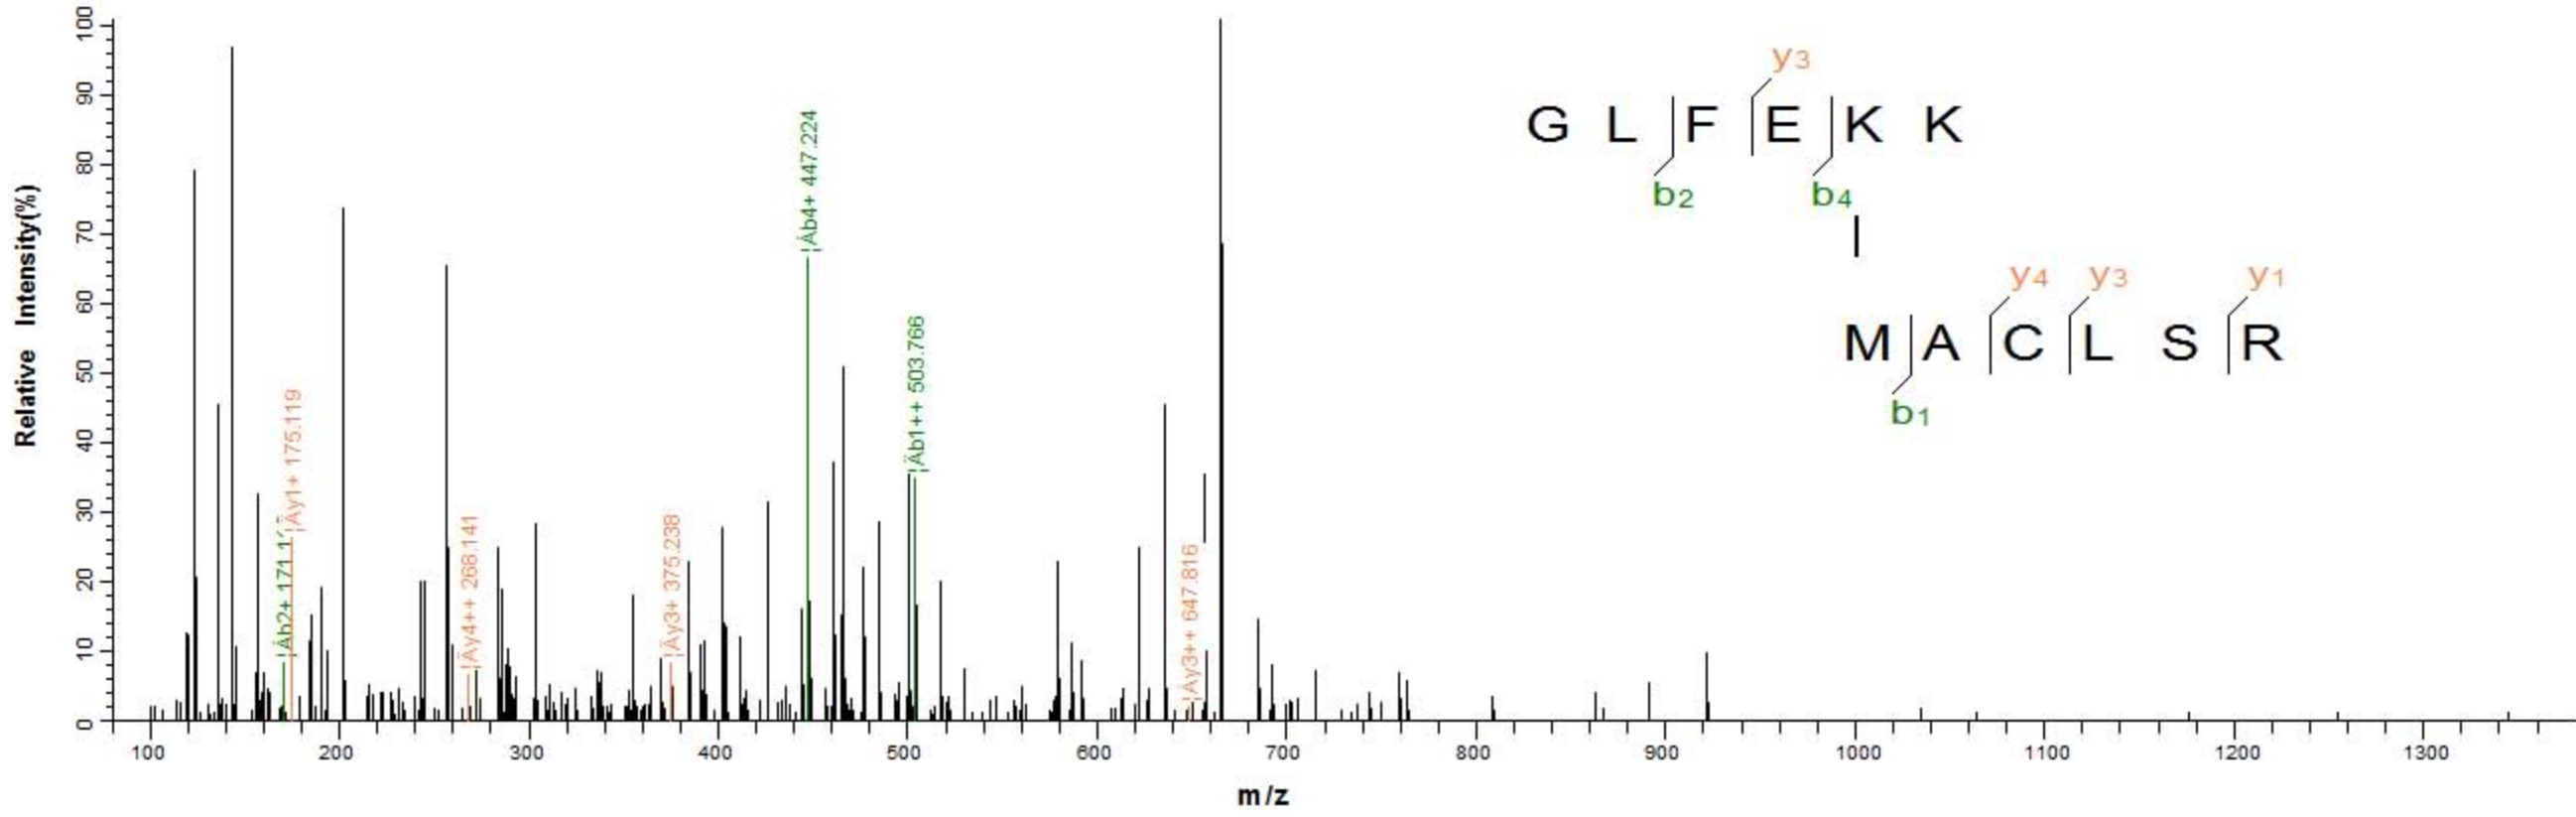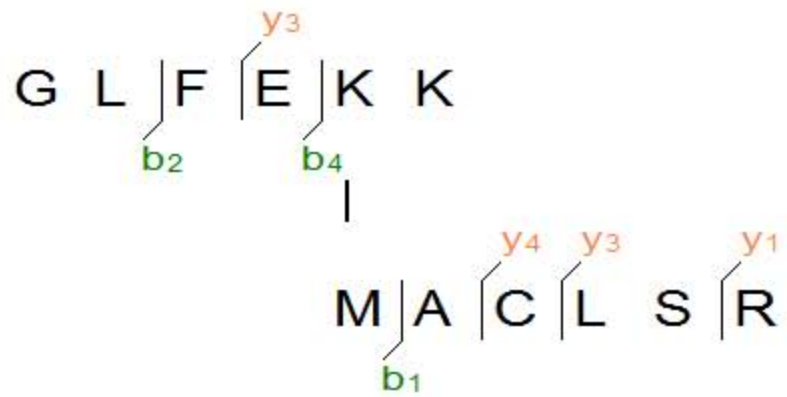



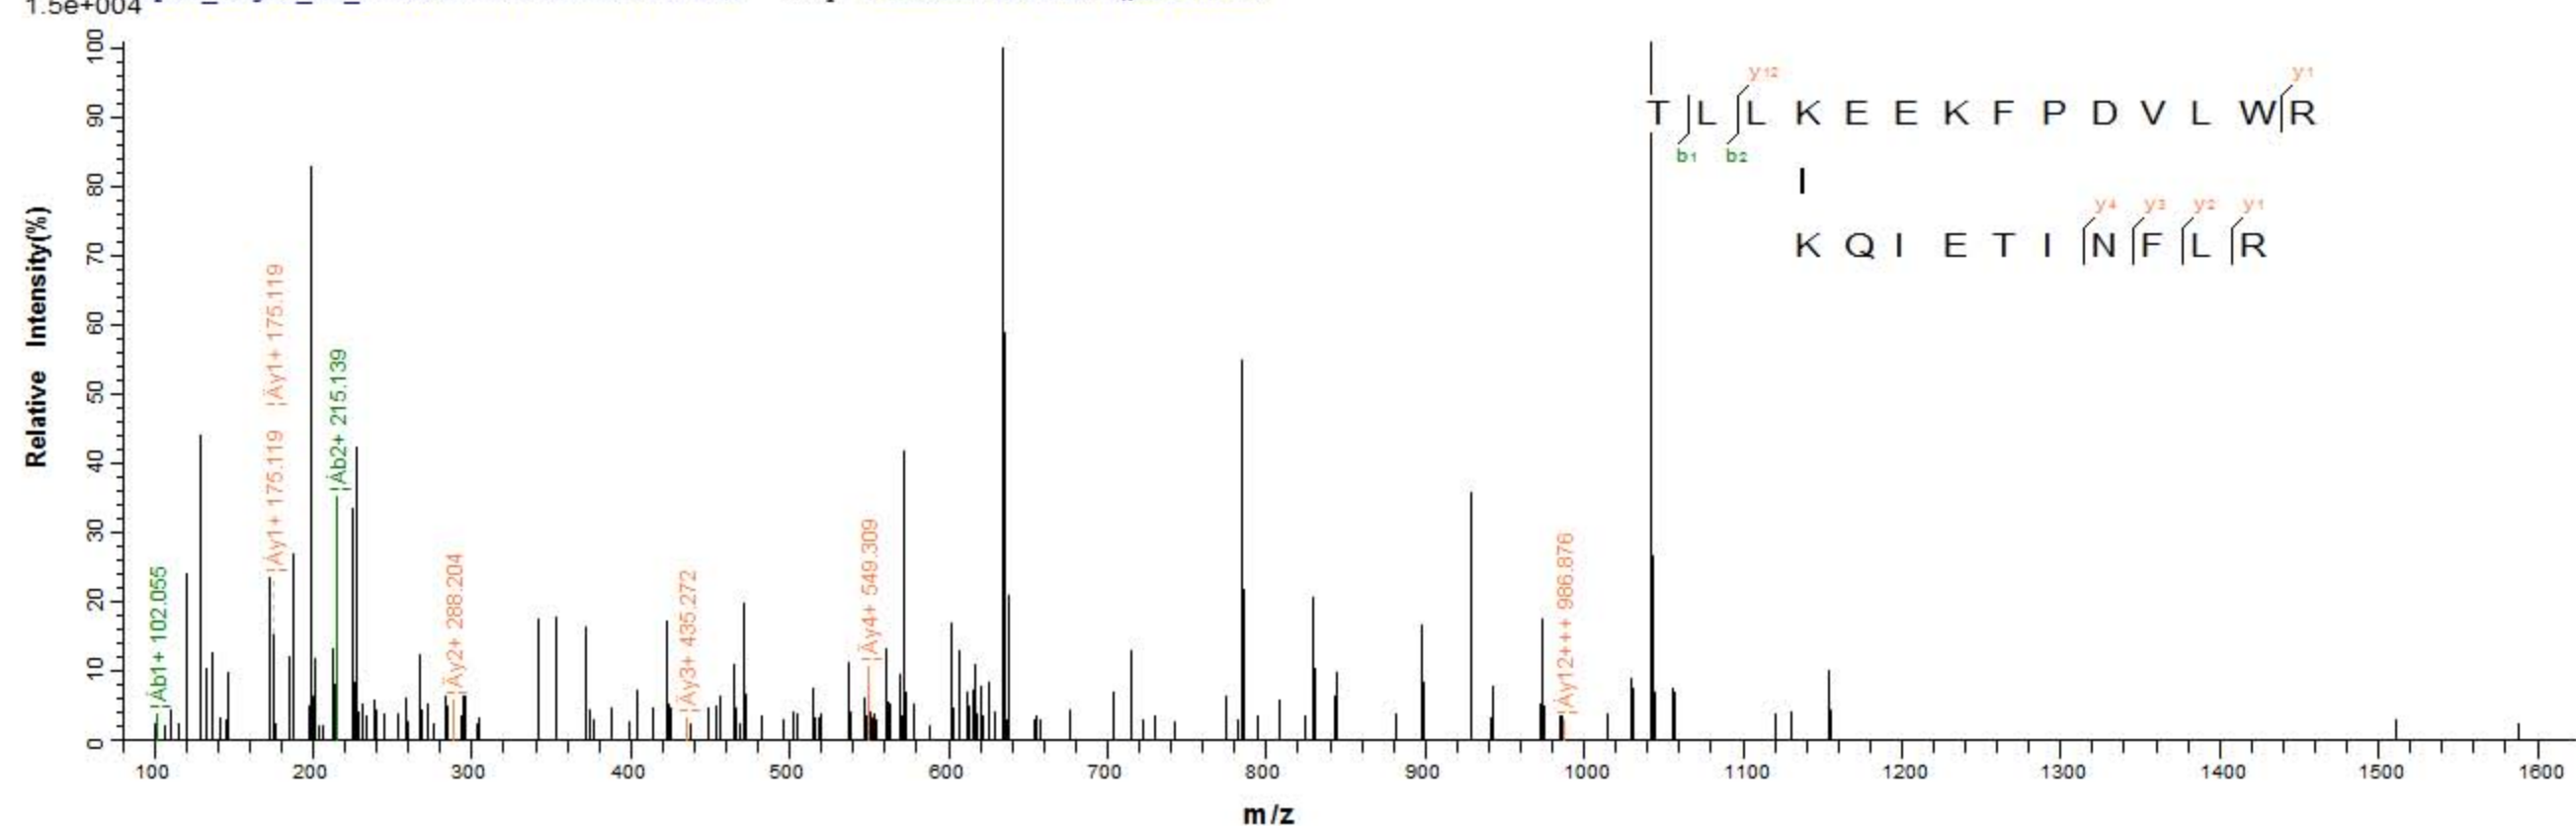

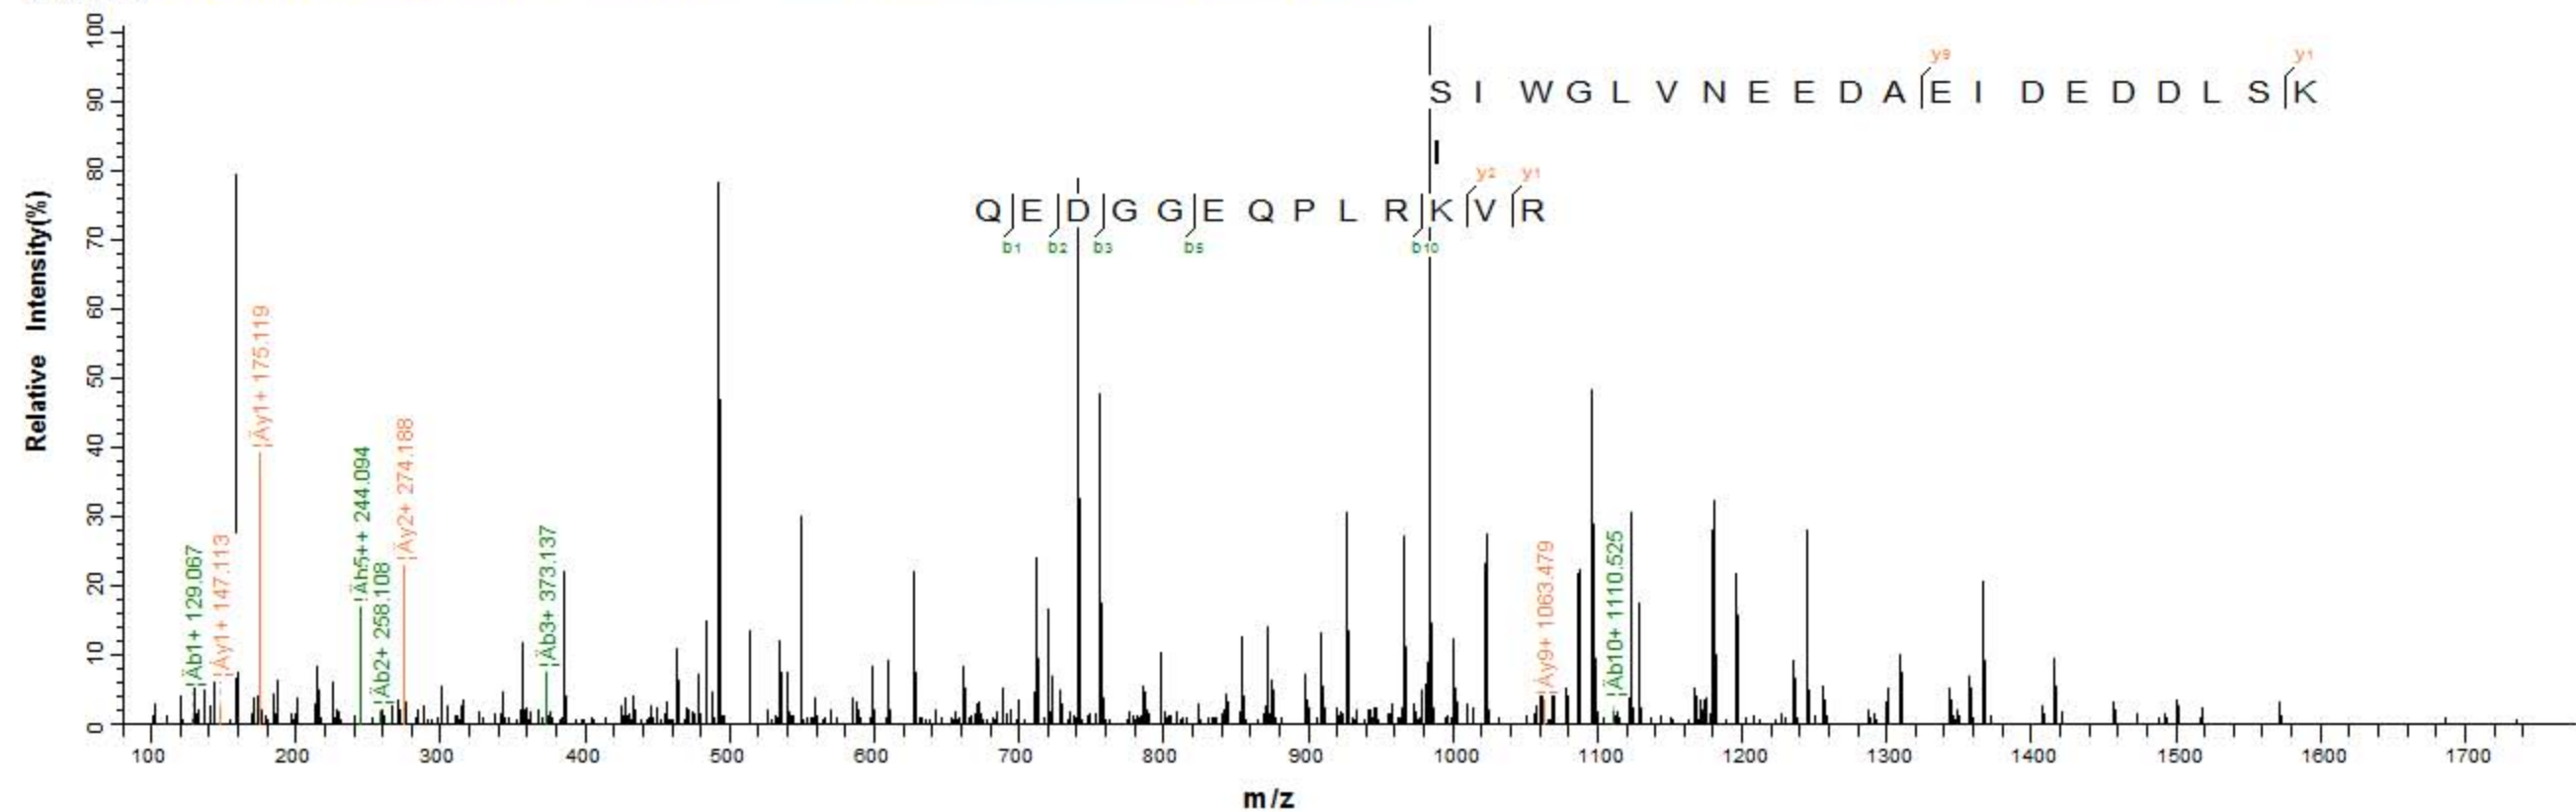

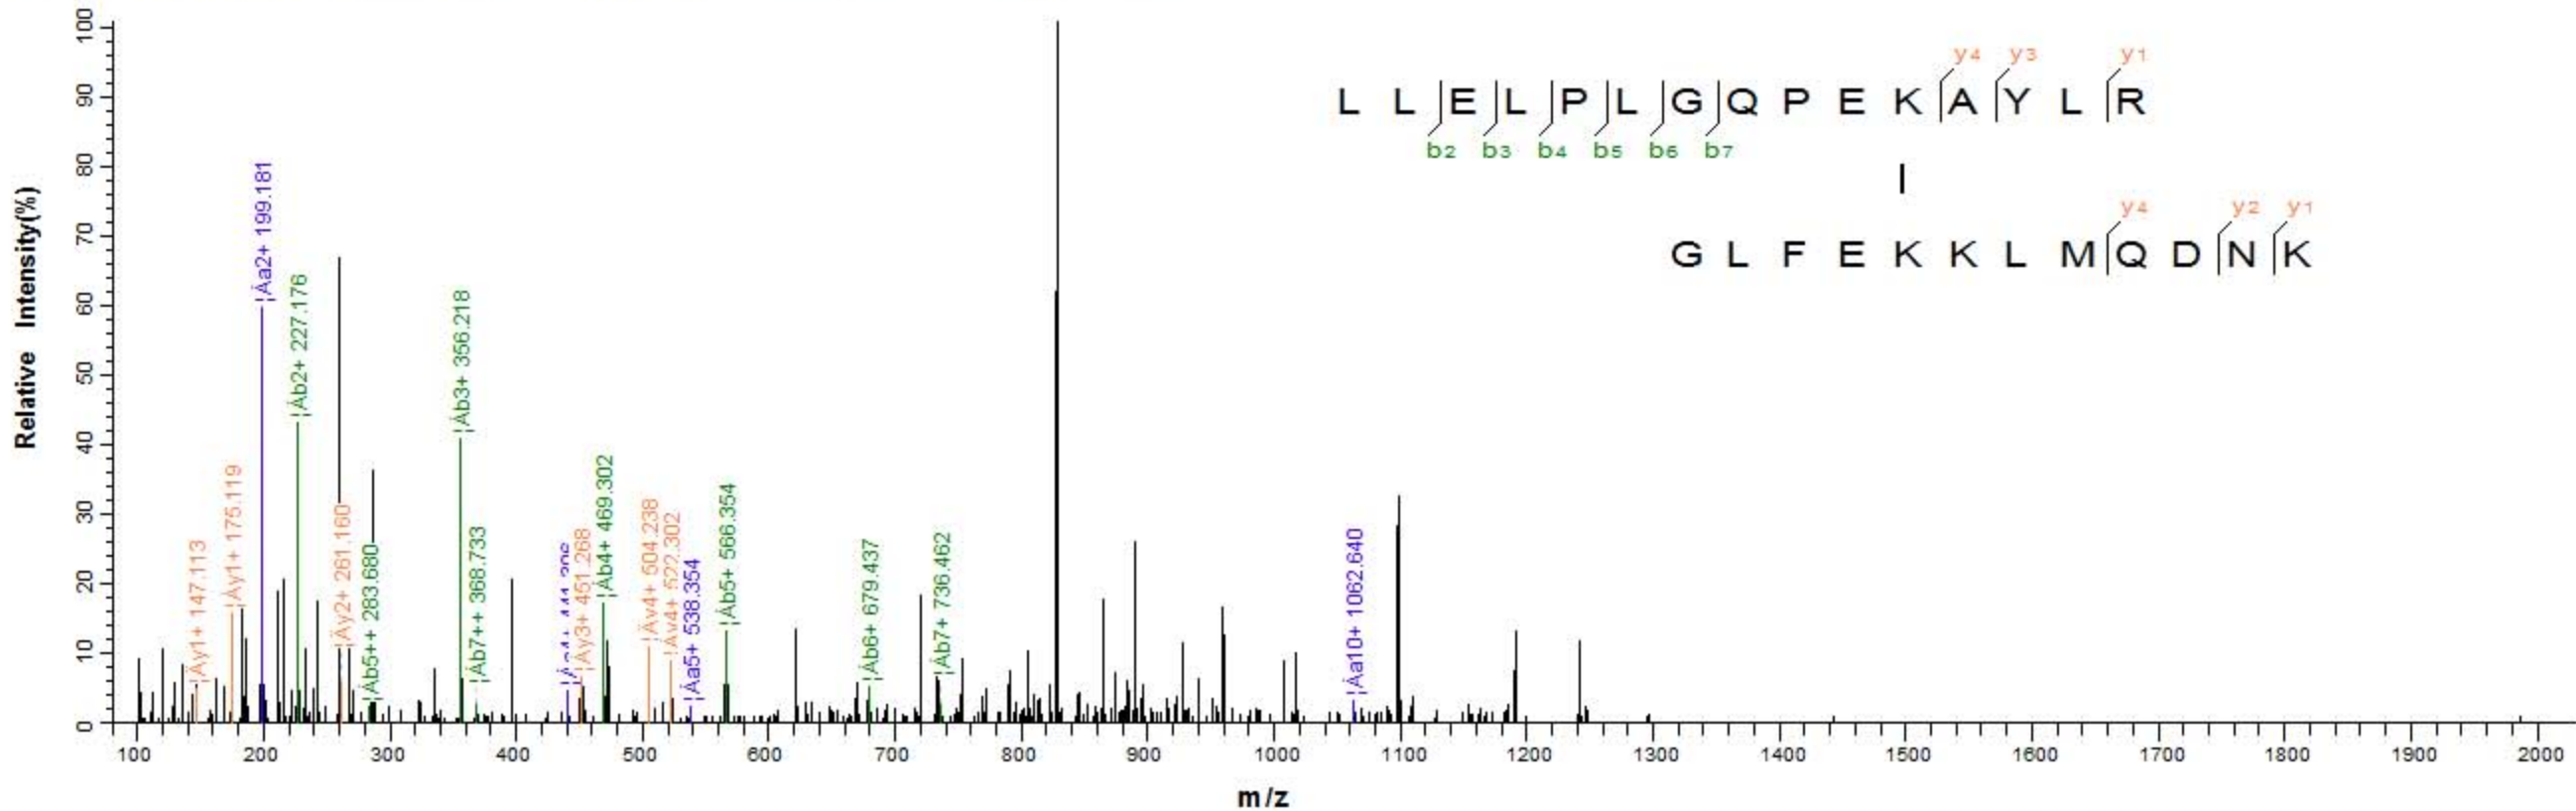

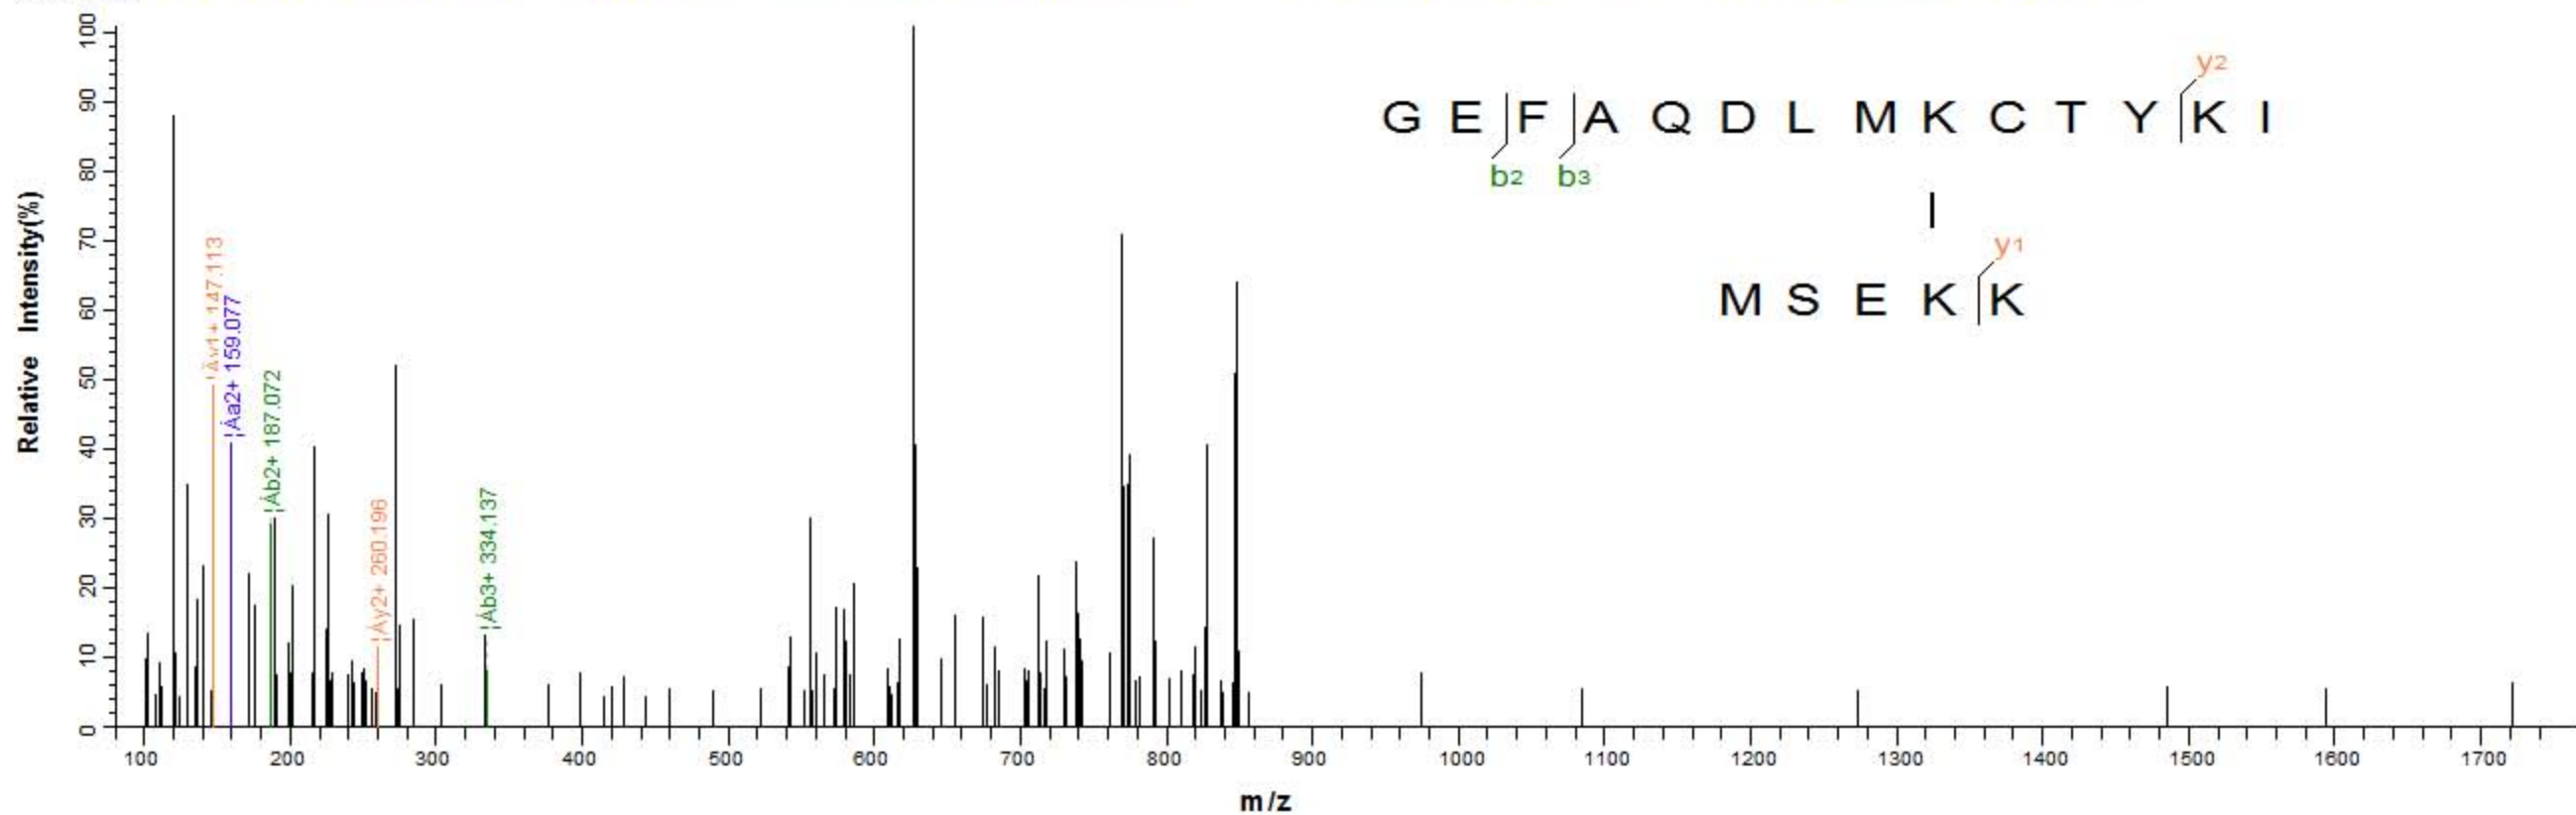

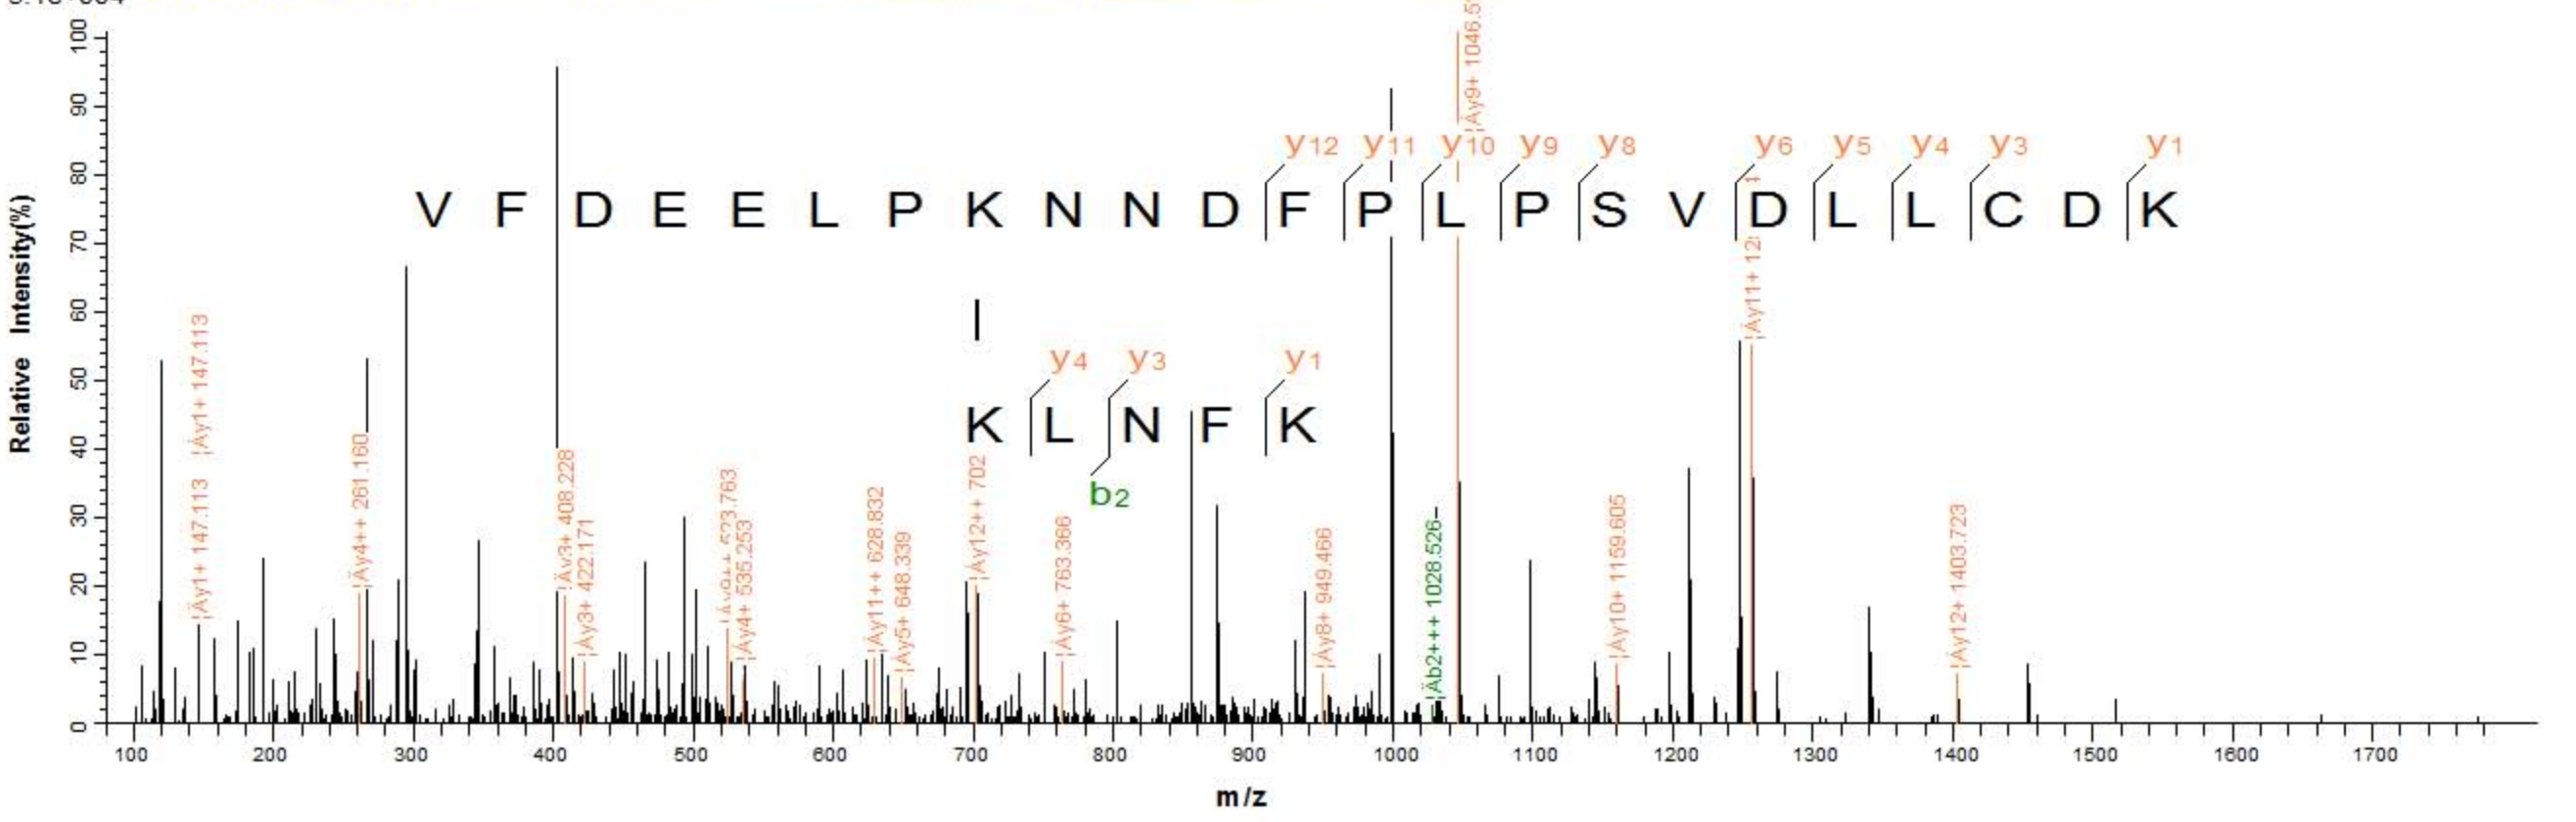

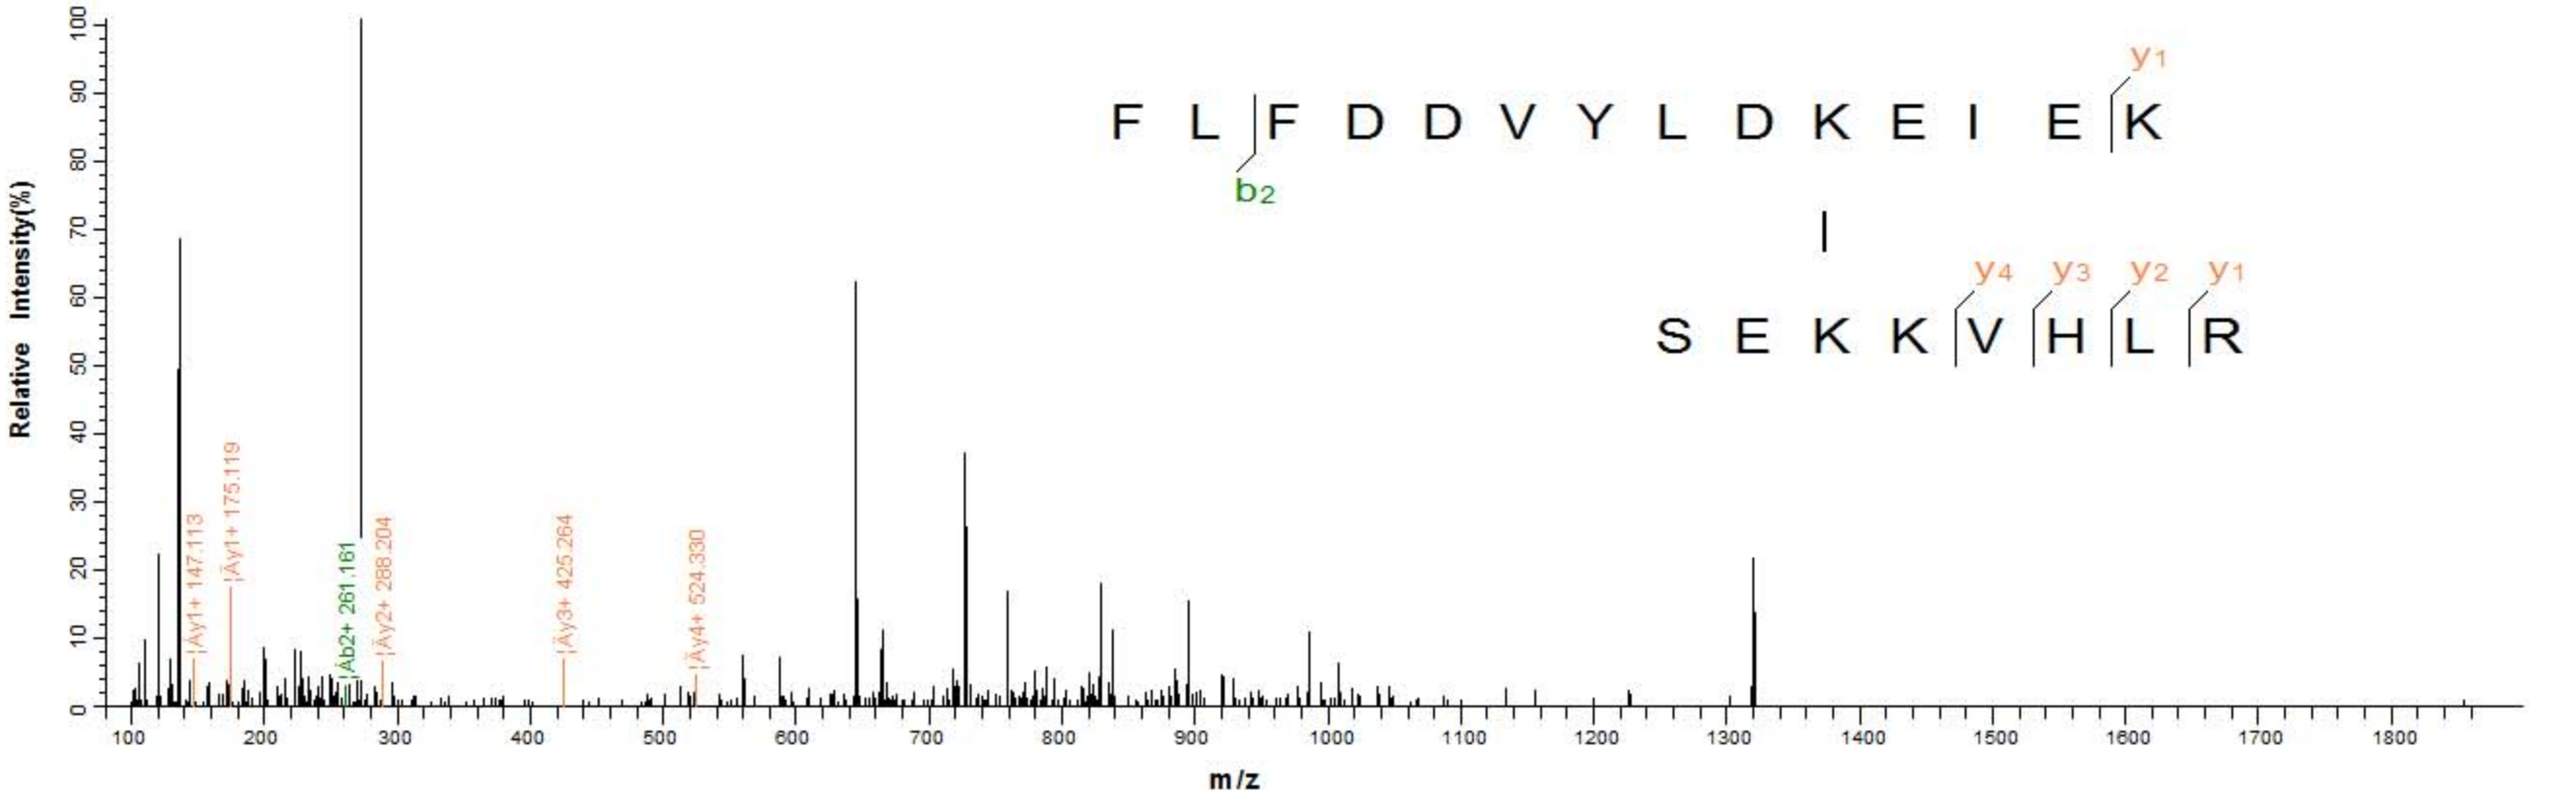

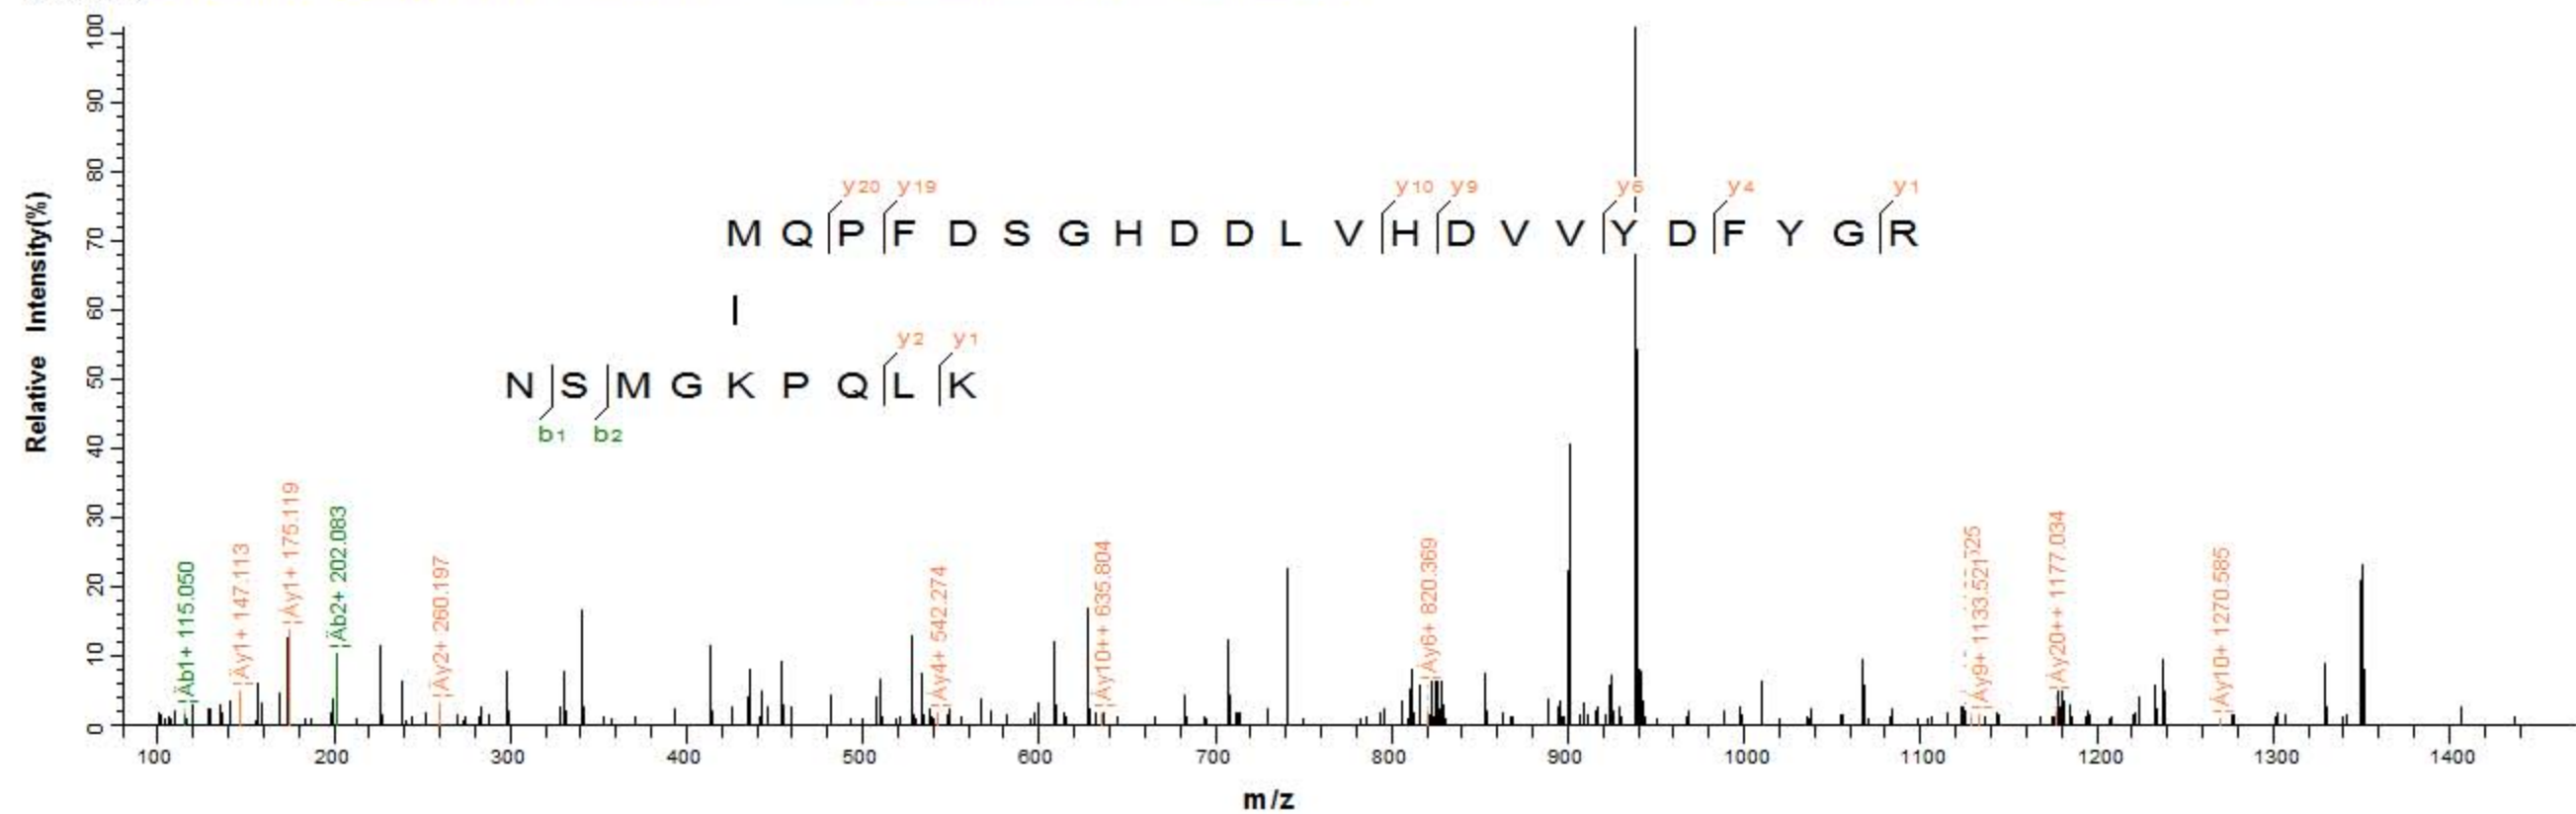

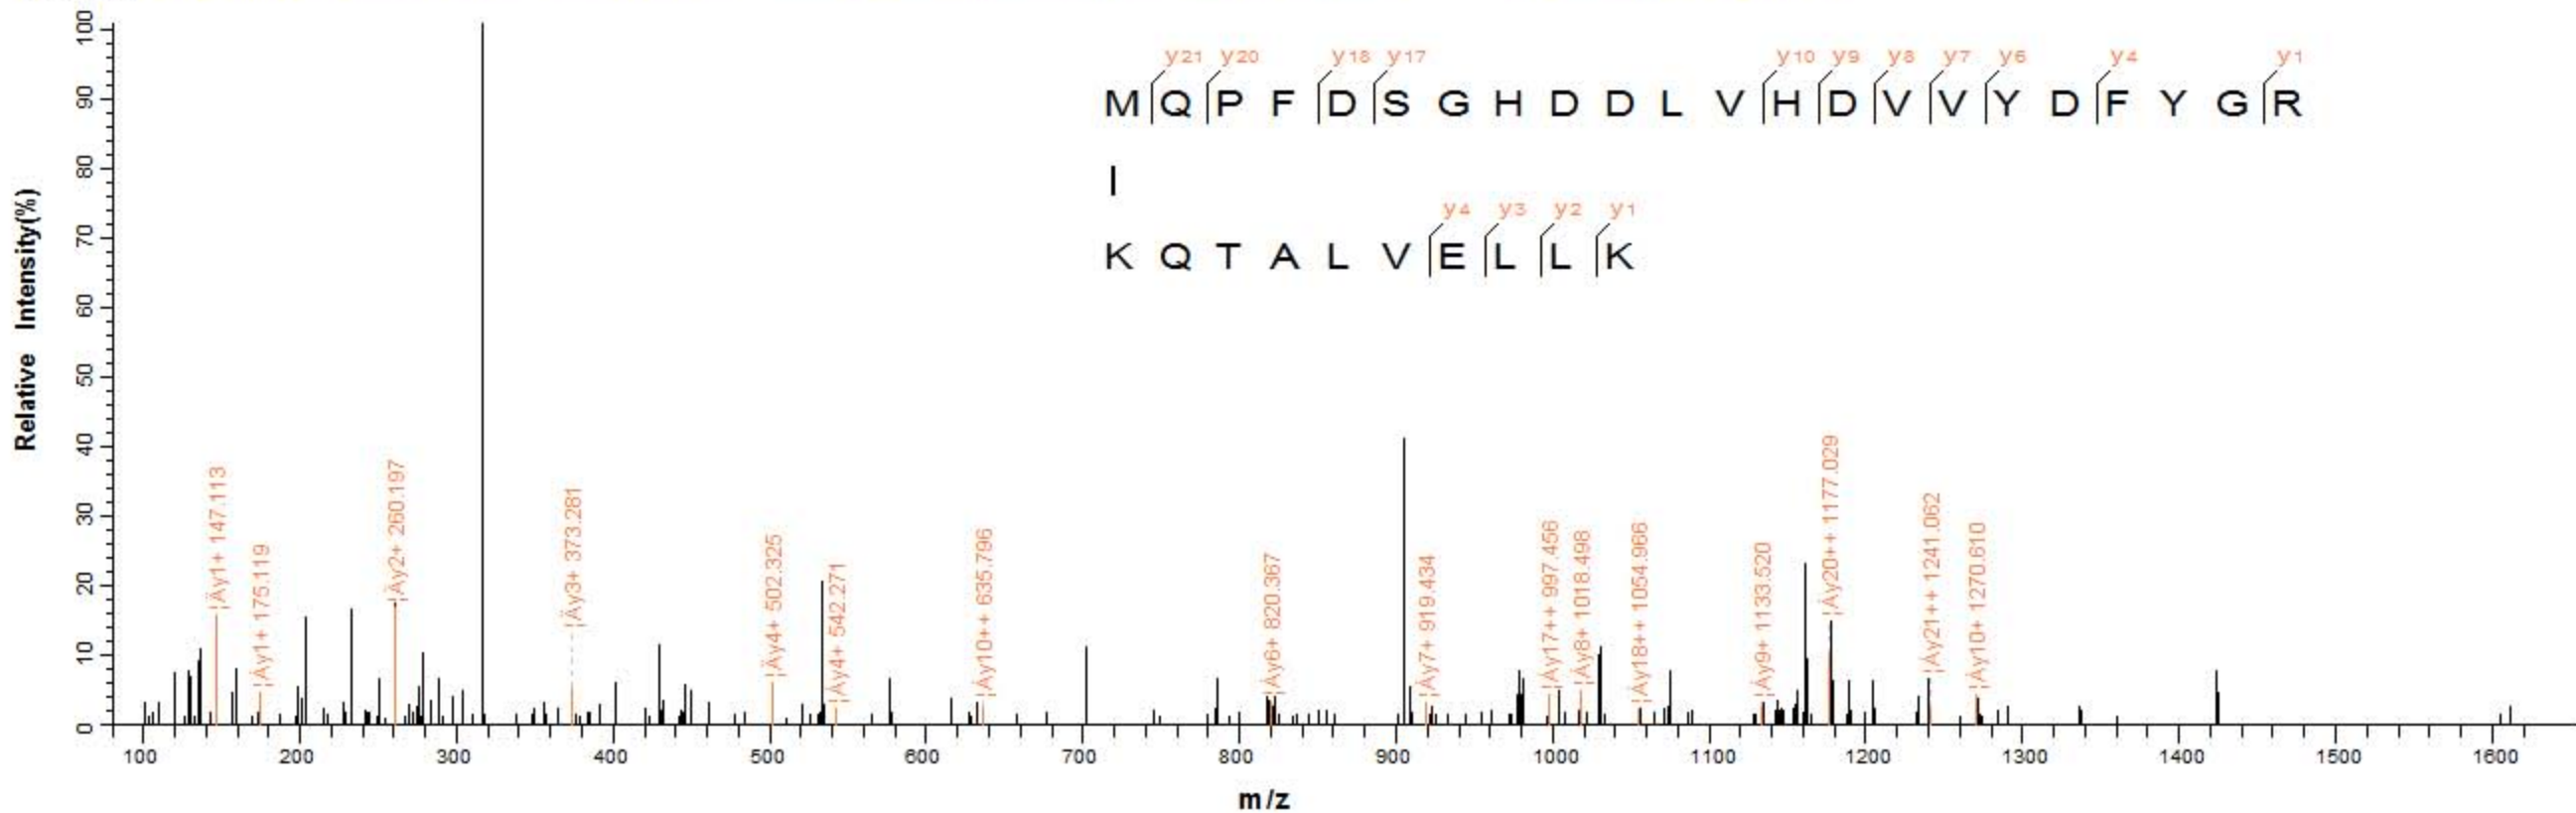



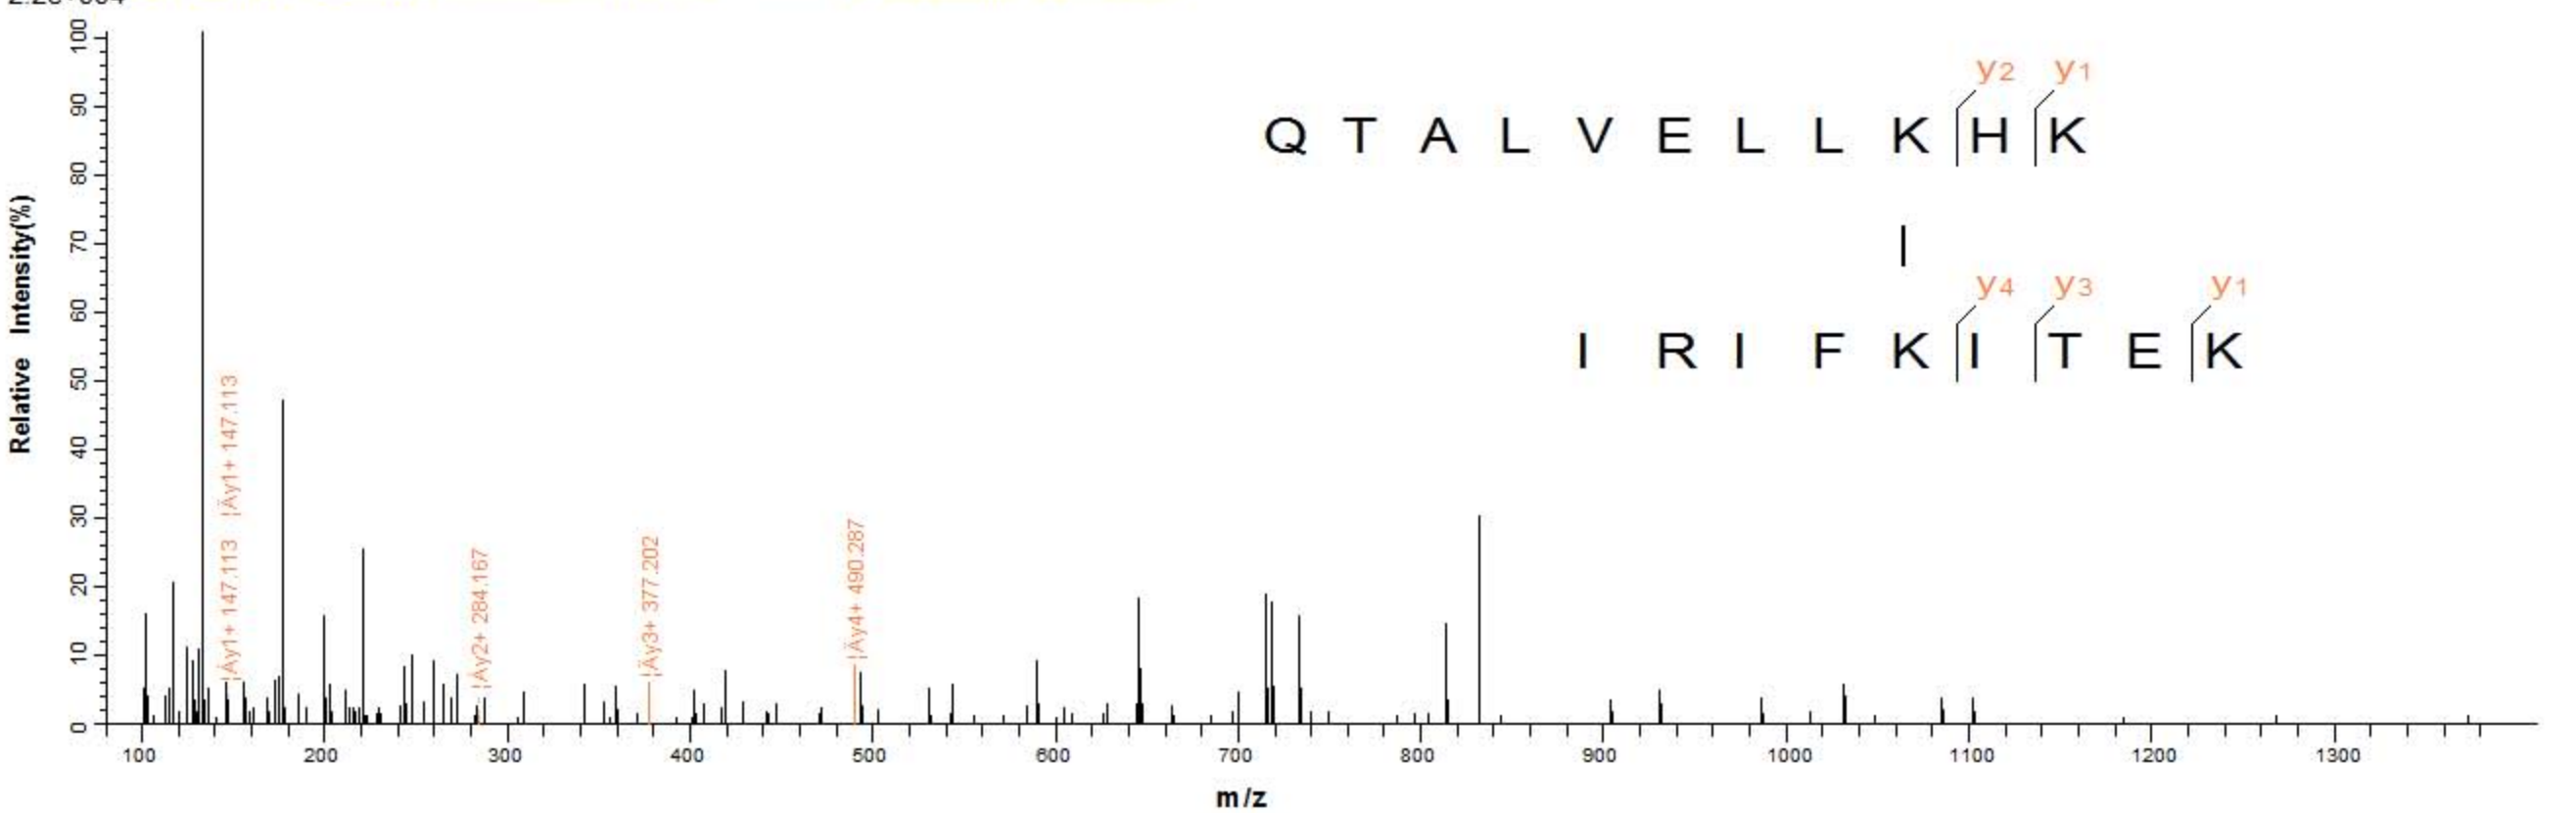

Supplement: supp_M114.041673_mcp.M114.041673-4.pdf [file supp_M114.041673_mcp.M114.041673-4.pdf]
