# Supplementary material
Source: PubMed Central journal article supplement (PMC4223482)
Supplement: supp_M114.041673_mcp.M114.041673-1.pdf [file supp_M114.041673_mcp.M114.041673-1.pdf]

## **SUPPLEMENTAL INFORMATION**

### **Structural characterization by cross-linking reveals the detailed architecture of a coatomer-related heptameric module from the nuclear pore complex**

Yi Shi<sup>1\*</sup>, Javier Fernandez-Martinez<sup>2\*</sup>, Elina Tjioe<sup>3\*</sup>, Riccardo Pellarin<sup>3\*</sup>, Seung Joong Kim<sup>3\*</sup>, Rosemary Williams<sup>2</sup>, Dina Schneidman-Duhovny<sup>3</sup>, Andrej Sali<sup>3</sup>, Michael P. Rout<sup>2</sup>, and Brian T. Chait<sup>1</sup>

*<sup>1</sup>Laboratory of Mass Spectrometry and Gaseous Ion Chemistry, The Rockefeller University, New York, NY 10065, USA*

*<sup>2</sup>Laboratory of Cellular and Structural Biology, The Rockefeller University, New York, NY 10065, USA*

*<sup>3</sup>Department of Bioengineering and Therapeutic Sciences, Department of Pharmaceutical Chemistry, California Institute for Quantitative Biosciences, Byers Hall, 1700 4th Street, Suite 503B, University of California, San Francisco, San Francisco, CA 94158, USA*

*\*These authors contributed equally to this work as co-first authors.*

#### **Corresponding authors**

*Brian T. Chait, Box 170, Laboratory of Mass Spectrometry and Gaseous Ion Chemistry, The Rockefeller University, New York, NY 10065, USA.*

*tel: +1 212 327 8849; fax: +1 212 327 7547; [chait@rockefeller.edu](mailto:chait@rockefeller.edu)*

*Michael P. Rout, Box 213, Laboratory of Cellular and Structural Biology, Rockefeller*

*University, 1230 York Avenue, New York, NY 10021, USA.*

*tel: +1 212 327 8135; fax: +1 212 327 7193; [rout@rockefeller.edu](mailto:rout@rockefeller.edu)*

*Andrej Sali, UCSF MC 2552, Byers Hall at Mission Bay, Suite 503B, University of California, San Francisco, 1700 4th Street, San Francisco, CA 94158, USA*

*tel: +1 415 514 4227; fax: +1 415 514 4231; [sali@salilab.org](mailto:sali@salilab.org)*

## **SUPPLEMENTAL EXPERIMENTAL PROCEDURES**

### ***Purification of the endogenous Nup84 complex***

To purify the native *S. cerevisiae* Nup84 complex, we used a strain in which the Nup84-encoding gene was genomically tagged with PrA preceded by the human rhinovirus 3C protease (ppx) target sequence (GLEVLFGGPS). Harvested cells, grown in YPD at 30°C, were frozen in liquid nitrogen and cryogenically lysed in a Retsch PM 100 planetary ball mill (<http://lab.rockefeller.edu/rout/protocols>). A total of 10-20 g of frozen cell powder were resuspended in 9 volumes of resuspension buffer (20 mM Hepes/KOH pH 7.4, 500 mM NaCl, 2 mM MgCl<sub>2</sub>, 0.1% (w/v) CHAPS, 1 mM DTT, 1/500 (v/v) Protease Inhibitor Cocktail (Sigma)). Cell lysate was clarified by centrifugation at 20,000 g for 10 minutes. IgG Ab conjugated magnetic beads (Invitrogen) at a concentration of 50 µL slurry/g of frozen powder were added to the clarified cell lysate and incubated for 30 minutes at 4°C. Beads were washed three times with 1 ml of resuspension buffer without protease inhibitors. Beads were resuspended in 10 µL of buffer and 3 µg of ppx protease were added. Beads were incubated at 4°C for 45 minutes with constant agitation. A magnet was used to separate the beads from the supernatant, 100 µL of digestion buffer were used to wash the remaining beads, and the total volume of sample was then centrifuged at 20,000 g for 10 minutes. The sample was then processed for cross-linking as described in the Experimental Procedures section.

### **Bayesian scoring function**

The Bayesian approach (1) estimates the probability of a model, given information available about the system, including both prior knowledge and newly acquired experimental data. The model  $M \equiv (X, \{\alpha_i\})$  includes the structure coordinates  $X$  and additional parameters  $\{\alpha_i\}$ . Using Bayes' theorem, the posterior probability  $p(M|D,I)$ , given data  $D$  and prior knowledge  $I$ , is  $p(M|D,I) \propto p(D|M,I)p(M,I)$ , where the likelihood function  $p(D|M,I)$  is the probability of observing data  $D$ , given  $I$  and  $M$ , and the prior is the probability of model  $M$ , given  $I$ . To define the likelihood function, one needs a forward model that predicts the data point (i.e., the presence of a cross-link between two given residues) given any model  $M$ , and a noise model that specifies the distribution of the deviation between the observed and predicted data points. The Bayesian scoring function is the negative logarithm of  $p(D|M,I)p(M|I)$ , which ranks the models identically to the posterior probability.

Briefly, the forward model  $f_n$  is computed as the probability of randomly picking two points  $\tilde{r}_i$  and  $\tilde{r}_j$  within the spheres centered on the  $C_\alpha$  atoms of the cross-linked residues, with coordinates  $r_i$  and  $r_j$ , with unknown radii  $\sigma_i$  and  $\sigma_j$ , such that the distance between them  $\tilde{r}_{ij}$  is lower than the maximum cross-linker length  $l_{XL}$ ; the radii  $\sigma_i$  and  $\sigma_j$  are proxies for the uncertainty of forming a cross-link, given structural model  $X$ . To reduce the number of parameters in the model, we utilized a single uncertainty parameter  $\sigma$  for all residues. We imposed  $l_{XL} = 21 \text{ \AA}$  and  $16 \text{ \AA}$  for the DSS and EDC cross-linkers, respectively.

The likelihood function for a cross-link  $d_n$  is  $p(d_n | X, I) = \psi \cdot (1 - f_n(X)) + f_n(X) \cdot (1 - \psi)$ , where  $\psi$  is the uncertainty of observing a cross-link that is approximately equal to the fraction of false-positive cross-links. We set  $\psi$  to 5%. The joint likelihood function  $p(D | M, I)$  for a dataset  $D = \{d_n\}$  of  $N_{XL}$  independently observed cross-links is the product of likelihood functions for each data point. When multiple residue pairs  $(n, n+1, \dots)$  are assigned to an individual cross-link observation, the ambiguity is taken account for by the following compound likelihood  $p(d_{n,n+1,\dots} | X, I) = 1 - \prod_n (1 - p(d_n | X, I))$ .

The model prior  $p(M | I)$  is defined as a product of the priors  $p(X)$  and  $p(\sigma)$  on the structural coordinates  $X$  and uncertainty  $\sigma$ , respectively. The prior  $p(X)$  includes the excluded volume restraints, the sequence connectivity restraints, the EM2D restraint, and a weak restraint whose score depends linearly on the distance between cross-linked residues, with a slope of  $0.01 \text{ \AA}^{-1}$ .  $p(\sigma)$  is a uniform distribution over the interval  $[0, 100]$ .

A detailed description of the representation, scoring function, and sampling is described elsewhere (2, 3).

### **EM 2D Restraint and Scoring Function**

The EM 2D restraint fits a given model to an EM class average (4) and computes a score that quantifies the match (5). The computation proceeds in three stages: (i) generation of alternative model projections, (ii) alignment of the class average and each model projection, and (iii) calculation of the fitting score for each projection.

**Projection generation.** The highest resolution bead representation of the evaluated model is used (Figure S3). The electron density of each bead is represented by a 3D Gaussian function projected onto a 2D grid. The pixel size of the resulting projection image is equal to the pixel size of the class average (5.9Å). The intensity of each grid point is:

$$\rho_{i,j} = \frac{m}{\sqrt{2\pi}\sigma} \sum_k \exp\left[-\frac{(\Delta r)^2}{2\sigma^2}\right]$$

where  $m$  is the mass of the bead,  $\Delta r$  is the distance between the bead center and the  $(i, j, k)$  point in 3D space, and  $\sigma$  is 0.425 times the resolution of the EM class average (30 Å here) (6). For sufficient coverage, 400 projections are generated by uniform sampling of the unit sphere (7). In the subsequent evaluations of the scoring function, to save time only projections that are within 20 degrees on the unit sphere from the previously selected best projection are considered; this periodic update is possible because the model changes slowly during sampling. All projections are calculated from scratch every 100 model sampling iterations.

**Alignment of the class average and model projection.** The projections and the class

average are segmented to identify the pixels originating from the modeled system, using thresholding and connected component labeling (8). Next, the principal axes of the segmented areas are computed. Each projection is aligned efficiently to the class average using only the principal axes of the segmented areas.

**Calculation of the fitting score.** For each pair of the aligned class average and a projection, the score is calculated as the cross-correlation coefficient between the two images. The final restraint score is the negative logarithm of the highest cross-correlation coefficient. The relative weight of the EM 2D restraint in the total score of a model was set to 500 based on an enumeration of the weight, requiring reasonable satisfaction of all types of restraints.

## **SUPPLEMENTAL TABLES**

### **Supplemental Table S1. DSS cross-linking MS data (attached separately)**

Note that only the identification with the best score is shown.

### **Supplemental Table S2. EDC cross-linking MS data (attached separately)**

Note that only the identification with the best score is shown. We were unable to unambiguously locate the conjugation sites for ~20% of the EDC cross-links, because many result from peptides containing consecutive and/or adjacent carboxylic acids. These ambiguities were accounted for in our modeling calculations, resulting in 123 possible EDC cross-links used for further analysis.



| A | 59 DSS cross-links |           |           |           |                     | 47 EDC cross-links |           |           |           |                     |
|---|--------------------|-----------|-----------|-----------|---------------------|--------------------|-----------|-----------|-----------|---------------------|
|   | Protein 1          | Residue 1 | Protein 2 | Residue 2 | Median Distance [Å] | Protein 1          | Residue 1 | Protein 2 | Residue 2 | Median Distance [Å] |
|   | Sec13              | 245       | Nup85     | 2         | 77.3                | Nup133             | 253       | Nup84     | 340       | 201.6               |
|   | Sec13              | 183       | Seh1      | 198       | 71.8                | Sec13              | 2         | Nup120    | 990       | 75.3                |
|   | Sec13              | 252       | Nup85     | 734       | 69.9                | Nup145c            | 141       | Seh1      | 284       | 72.7                |
|   | Nup145c            | 39        | Nup85     | 163       | 64.4                | Nup145c            | 39        | Nup85     | 164       | 64.2                |
|   | Nup145c            | 43        | Nup85     | 163       | 63.7                | Nup85              | 705       | Seh1      | 144       | 59.2                |
|   | Nup85              | 60        | Nup145c   | 43        | 62.8                | Sec13              | 2         | Seh1      | 279       | 55.2                |
|   | Nup85              | 718       | Seh1      | 198       | 59.7                | Nup145c            | 62        | Nup85     | 2         | 52.9                |
|   | Nup133             | 966       | Nup84     | 625       | 56.5                | Nup145c            | 63        | Nup85     | 2         | 52.9                |
|   | Nup145c            | 1         | Nup85     | 163       | 55.0                | Sec13              | 2         | Nup145c   | 283       | 52.7                |
|   | Nup145c            | 39        | Nup85     | 2         | 53.2                | Seh1               | 40        | Nup145c   | 44        | 41.3                |
|   | Seh1               | 207       | Nup85     | 2         | 49.4                | Nup85              | 536       | Nup145c   | 70        | 40.9                |
|   | Seh1               | 212       | Nup85     | 2         | 45.9                | Nup145c            | 39        | Nup85     | 715       | 40.8                |
|   | Sec13              | 2         | Seh1      | 198       | 45.8                | Seh1               | 79        | Nup85     | 2         | 40.4                |
|   | Nup145c            | 59        | Nup85     | 680       | 39.7                | Nup145c            | 39        | Nup85     | 717       | 36.5                |
|   | Nup85              | 680       | Nup145c   | 43        | 39.7                | Sec13              | 2         | Seh1      | 141       | 32.0                |
|   | Sec13              | 83        | Nup145c   | 649       | 39.5                | Nup145c            | 43        | Seh1      | 138       | 30.8                |
|   | Nup145c            | 39        | Nup85     | 680       | 38.9                | Nup145c            | 39        | Seh1      | 138       | 29.6                |
|   | Seh1               | 236       | Nup85     | 2         | 38.3                | Nup145c            | 39        | Nup85     | 587       | 24.8                |
|   | Seh1               | 100       | Nup85     | 2         | 34.9                | Nup145c            | 39        | Seh1      | 141       | 24.8                |
|   | Seh1               | 40        | Nup85     | 564       | 34.6                | Nup145c            | 43        | Seh1      | 141       | 24.7                |
|   | Sec13              | 2         | Nup145c   | 141       | 34.4                | Nup84              | 154       | Nup145c   | 335       | 24.0                |
|   | Nup145c            | 59        | Nup85     | 564       | 27.3                | Nup84              | 154       | Nup145c   | 338       | 20.1                |
|   | Nup145c            | 1         | Nup85     | 564       | 25.4                | Nup133             | 936       | Nup84     | 713       | 20.0                |
|   | Seh1               | 1         | Nup85     | 163       | 24.7                | Sec13              | 282       | Nup145c   | 438       | 19.4                |
|   | Sec13              | 244       | Nup145c   | 437       | 23.8                | Sec13              | 2         | Nup145c   | 22        | 19.3                |
|   | Nup145c            | 183       | Sec13     | 282       | 23.7                | Nup85              | 585       | Nup145c   | 42        | 18.9                |
|   | Nup145c            | 694       | Nup85     | 729       | 23.5                | Sec13              | 2         | Nup145c   | 42        | 18.3                |
|   | Nup85              | 438       | Seh1      | 244       | 22.5                | Sec13              | 2         | Nup145c   | 60        | 18.3                |
|   | Nup120             | 972       | Nup85     | 729       | 22.5                | Nup84              | 712       | Nup133    | 935       | 18.0                |
|   | Nup120             | 972       | Nup85     | 734       | 22.3                | Seh1               | 40        | Nup85     | 2         | 17.6                |
|   | Nup120             | 943       | Nup145c   | 672       | 22.0                | Nup84              | 143       | Nup145c   | 335       | 17.1                |
|   | Seh1               | 34        | Nup85     | 2         | 21.9                | Nup145c            | 43        | Nup85     | 587       | 17.0                |
|   | Nup120             | 972       | Nup85     | 733       | 20.6                | Sec13              | 2         | Nup145c   | 72        | 16.8                |
|   | Nup120             | 972       | Nup145c   | 694       | 20.6                | Sec13              | 2         | Nup145c   | 61        | 16.8                |
|   | Nup120             | 972       | Nup145c   | 681       | 20.1                | Sec13              | 282       | Nup145c   | 179       | 16.6                |
|   | Nup120             | 943       | Nup145c   | 681       | 19.6                | Sec13              | 283       | Nup145c   | 437       | 15.5                |
|   | Sec13              | 2         | Nup145c   | 39        | 19.3                | Sec13              | 2         | Nup145c   | 164       | 14.4                |
|   | Sec13              | 31        | Nup145c   | 141       | 19.0                | Seh1               | 2         | Nup85     | 34        | 14.1                |
|   | Seh1               | 236       | Nup85     | 64        | 18.9                | Seh1               | 1         | Nup85     | 33        | 13.9                |
|   | Nup133             | 936       | Nup84     | 712       | 18.8                | Seh1               | 1         | Nup85     | 32        | 13.9                |
|   | Sec13              | 2         | Nup145c   | 59        | 18.3                | Sec13              | 10        | Nup145c   | 164       | 13.4                |
|   | Sec13              | 2         | Nup145c   | 43        | 18.3                | Nup85              | 17        | Seh1      | 1         | 12.2                |
|   | Sec13              | 282       | Nup145c   | 437       | 18.2                | Seh1               | 1         | Nup85     | 4         | 12.2                |
|   | Seh1               | 40        | Nup85     | 2         | 17.6                | Nup85              | 2         | Seh1      | 1         | 12.2                |
|   | Sec13              | 288       | Nup145c   | 437       | 16.3                | Sec13              | 286       | Nup145c   | 437       | 11.7                |
|   | Sec13              | 2         | Nup145c   | 163       | 15.8                | Seh1               | 2         | Nup85     | 4         | 10.8                |
|   | Sec13              | 282       | Nup145c   | 174       | 15.7                | Seh1               | 2         | Nup85     | 5         | 10.8                |
|   | Sec13              | 65        | Nup145c   | 509       | 14.9                |                    |           |           |           |                     |
|   | Seh1               | 1         | Nup85     | 39        | 13.9                |                    |           |           |           |                     |
|   | Seh1               | 1         | Nup85     | 30        | 13.9                |                    |           |           |           |                     |
|   | Seh1               | 1         | Nup85     | 89        | 13.1                |                    |           |           |           |                     |
|   | Sec13              | 44        | Nup145c   | 168       | 13.0                |                    |           |           |           |                     |
|   | Seh1               | 1         | Nup85     | 2         | 12.2                |                    |           |           |           |                     |
|   | Nup145c            | 353       | Nup84     | 154       | 12.1                |                    |           |           |           |                     |
|   | Sec13              | 2         | Nup145c   | 168       | 12.0                |                    |           |           |           |                     |
|   | Seh1               | 2         | Nup85     | 1         | 10.8                |                    |           |           |           |                     |
|   | Sec13              | 277       | Nup145c   | 174       | 10.7                |                    |           |           |           |                     |
|   | Sec13              | 34        | Nup145c   | 168       | 10.3                |                    |           |           |           |                     |
|   | Sec13              | 2         | Nup145c   | 174       | 9.5                 |                    |           |           |           |                     |

**Supplemental Table S3. (A) The median distances of the inter-molecular cross-links calculated using the 6,520 solutions.**

Violated cross-links are highlighted in orange.

| B                           | 104 DSS cross-links |           |           |           |                     | 76 EDC cross-links |           |           |           |                     |
|-----------------------------|---------------------|-----------|-----------|-----------|---------------------|--------------------|-----------|-----------|-----------|---------------------|
|                             | Protein 1           | Residue 1 | Protein 2 | Residue 2 | Median Distance [Å] | Protein 1          | Residue 1 | Protein 2 | Residue 2 | Median Distance [Å] |
| Intra-molecular cross-links | Nup85               | 293       | Nup85     | 2         | 62.2                | Nup133             | 936       | Nup133    | 392       | 118.8               |
|                             | Nup85               | 231       | Nup85     | 2         | 54.5                | Nup145c            | 593       | Nup145c   | 201       | 48.5                |
|                             | Nup133              | 506       | Nup133    | 59        | 38.6                | Nup133             | 946       | Nup133    | 1097      | 30.6                |
|                             | Nup133              | 1072      | Nup133    | 936       | 30.6                | Nup145c            | 250       | Nup145c   | 213       | 25.5                |
|                             | Nup85               | 85        | Nup85     | 2         | 26.6                | Nup84              | 544       | Nup84     | 565       | 23.8                |
|                             | Sec13               | 2         | Sec13     | 31        | 24.8                | Nup133             | 936       | Nup133    | 952       | 23.2                |
|                             | Nup133              | 59        | Nup133    | 5         | 24.2                | Nup133             | 1072      | Nup133    | 1032      | 22.7                |
|                             | Nup84               | 573       | Nup84     | 544       | 23.8                | Nup145c            | 39        | Nup145c   | 61        | 22.1                |
|                             | Nup84               | 592       | Nup84     | 560       | 23.4                | Sec13              | 2         | Sec13     | 47        | 20.0                |
|                             | Nup145c             | 183       | Nup145c   | 174       | 23.2                | Nup84              | 143       | Nup84     | 164       | 19.2                |
|                             | Nup84               | 544       | Nup84     | 670       | 23.0                | Nup120             | 400       | Nup120    | 441       | 18.9                |
|                             | Nup133              | 191       | Nup133    | 239       | 22.8                | Seh1               | 207       | Seh1      | 279       | 18.8                |
|                             | Nup133              | 1034      | Nup133    | 946       | 22.8                | Seh1               | 207       | Seh1      | 283       | 18.8                |
|                             | Nup133              | 913       | Nup133    | 946       | 22.7                | Nup85              | 30        | Nup85     | 164       | 18.7                |
|                             | Nup133              | 544       | Nup133    | 488       | 22.2                | Nup133             | 913       | Nup133    | 1097      | 18.4                |
|                             | Nup85               | 718       | Nup85     | 734       | 22.2                | Nup145c            | 219       | Nup145c   | 187       | 18.2                |
|                             | Nup85               | 718       | Nup85     | 733       | 22.1                | Nup133             | 946       | Nup133    | 935       | 17.8                |
|                             | Nup145c             | 593       | Nup145c   | 694       | 21.8                | Nup145c            | 91        | Nup145c   | 70        | 17.3                |
|                             | Nup133              | 532       | Nup133    | 488       | 21.7                | Nup120             | 865       | Nup120    | 894       | 17.2                |
|                             | Nup145c             | 1         | Nup145c   | 43        | 21.6                | Nup120             | 865       | Nup120    | 898       | 17.2                |
|                             | Nup120              | 17        | Nup120    | 735       | 21.3                | Nup145c            | 642       | Nup145c   | 686       | 16.7                |
|                             | Nup145c             | 668       | Nup145c   | 593       | 21.2                | Nup145c            | 91        | Nup145c   | 60        | 16.5                |
|                             | Nup133              | 946       | Nup133    | 912       | 20.8                | Nup145c            | 91        | Nup145c   | 44        | 16.5                |
|                             | Nup145c             | 183       | Nup145c   | 197       | 20.5                | Nup120             | 38        | Nup120    | 429       | 16.4                |
|                             | Nup145c             | 1         | Nup145c   | 39        | 20.2                | Nup133             | 913       | Nup133    | 989       | 16.4                |
|                             | Seh1                | 207       | Seh1      | 198       | 20.2                | Nup120             | 735       | Nup120    | 403       | 16.2                |
|                             | Nup85               | 60        | Nup85     | 39        | 20.1                | Seh1               | 37        | Seh1      | 89        | 16.2                |
|                             | Nup85               | 39        | Nup85     | 60        | 20.1                | Nup85              | 87        | Nup85     | 59        | 16.2                |
|                             | Nup133              | 168       | Nup133    | 191       | 19.8                | Nup145c            | 39        | Nup145c   | 60        | 16.2                |
|                             | Nup85               | 60        | Nup85     | 2         | 19.8                | Nup145c            | 672       | Nup145c   | 700       | 16.2                |
|                             | Nup84               | 23        | Nup84     | 14        | 19.8                | Nup133             | 1142      | Nup133    | 1068      | 16.0                |
|                             | Nup133              | 1072      | Nup133    | 1035      | 19.5                | Nup145c            | 681       | Nup145c   | 700       | 16.0                |
|                             | Nup145c             | 683       | Nup145c   | 672       | 19.2                | Nup145c            | 681       | Nup145c   | 704       | 16.0                |
|                             | Seh1                | 40        | Seh1      | 34        | 19.1                | Nup133             | 912       | Nup133    | 1097      | 15.8                |
|                             | Nup145c             | 642       | Nup145c   | 694       | 18.8                | Nup120             | 400       | Nup120    | 440       | 15.8                |
|                             | Nup145c             | 694       | Nup145c   | 649       | 18.8                | Nup133             | 187       | Nup133    | 127       | 15.8                |
|                             | Nup120              | 400       | Nup120    | 735       | 18.7                | Seh1               | 201       | Seh1      | 279       | 15.5                |
|                             | Nup133              | 1072      | Nup133    | 1034      | 18.7                | Seh1               | 201       | Seh1      | 283       | 15.5                |
|                             | Nup85               | 30        | Nup85     | 163       | 18.5                | Nup120             | 206       | Nup120    | 219       | 14.7                |
|                             | Nup145c             | 67        | Nup145c   | 43        | 18.5                | Nup133             | 486       | Nup133    | 442       | 14.5                |
|                             | Nup84               | 602       | Nup84     | 544       | 17.7                | Nup133             | 484       | Nup133    | 442       | 14.5                |
|                             | Nup120              | 735       | Nup120    | 412       | 17.6                | Nup133             | 103       | Nup133    | 131       | 14.2                |
|                             | Sec13               | 2         | Sec13     | 34        | 17.4                | Nup133             | 103       | Nup133    | 130       | 14.2                |
|                             | Nup84               | 23        | Nup84     | 460       | 17.2                | Nup133             | 394       | Nup133    | 454       | 14.2                |
|                             | Nup85               | 680       | Nup85     | 734       | 17.1                | Nup133             | 1142      | Nup133    | 1069      | 14.2                |
|                             | Nup85               | 89        | Nup85     | 2         | 17.0                | Nup133             | 168       | Nup133    | 131       | 14.0                |
|                             | Nup85               | 247       | Nup85     | 237       | 16.8                | Nup120             | 735       | Nup120    | 405       | 14.0                |
|                             | Nup145c             | 642       | Nup145c   | 681       | 16.7                | Nup145c            | 309       | Nup145c   | 293       | 13.9                |
|                             | Nup145c             | 642       | Nup145c   | 683       | 16.7                | Sec13              | 277       | Sec13     | 294       | 13.9                |
|                             | Nup145c             | 284       | Nup145c   | 357       | 16.7                | Nup133             | 506       | Nup133    | 562       | 13.6                |
|                             | Nup85               | 39        | Nup85     | 2         | 16.6                | Nup133             | 171       | Nup133    | 127       | 13.5                |
|                             | Nup85               | 30        | Nup85     | 1         | 16.6                | Seh1               | 198       | Seh1      | 279       | 13.4                |
|                             | Nup85               | 30        | Nup85     | 2         | 16.6                | Nup84              | 544       | Nup84     | 598       | 12.9                |
|                             | Seh1                | 248       | Seh1      | 207       | 16.4                | Sec13              | 2         | Sec13     | 37        | 12.7                |
|                             | Nup145c             | 48        | Nup145c   | 39        | 16.2                | Nup145c            | 219       | Nup145c   | 231       | 12.2                |
|                             | Nup145c             | 59        | Nup145c   | 39        | 16.2                | Nup133             | 1144      | Nup133    | 1068      | 12.0                |
|                             | Nup145c             | 694       | Nup145c   | 672       | 16.2                | Nup145c            | 193       | Nup145c   | 223       | 12.0                |
|                             | Nup84               | 20        | Nup84     | 459       | 16.1                | Nup120             | 400       | Nup120    | 523       | 11.6                |
|                             | Nup145c             | 681       | Nup145c   | 711       | 16.0                | Nup145c            | 183       | Nup145c   | 231       | 11.6                |
|                             | Nup145c             | 694       | Nup145c   | 681       | 16.0                | Sec13              | 186       | Sec13     | 239       | 11.6                |
|                             | Nup145c             | 707       | Nup145c   | 681       | 16.0                | Nup84              | 143       | Nup84     | 175       | 11.5                |
|                             | Sec13               | 277       | Sec13     | 249       | 15.9                | Sec13              | 22        | Sec13     | 41        | 11.4                |
|                             | Nup84               | 669       | Nup84     | 712       | 15.9                | Nup85              | 85        | Nup85     | 63        | 11.3                |
|                             | Nup133              | 171       | Nup133    | 191       | 15.6                | Nup145c            | 183       | Nup145c   | 226       | 10.7                |
|                             | Sec13               | 252       | Sec13     | 245       | 15.5                | Sec13              | 288       | Sec13     | 250       | 10.5                |
|                             | Nup120              | 400       | Nup120    | 531       | 15.5                | Nup133             | 480       | Nup133    | 63        | 10.2                |
|                             | Nup133              | 278       | Nup133    | 239       | 14.9                | Seh1               | 37        | Seh1      | 92        | 10.1                |
|                             | Nup84               | 573       | Nup84     | 560       | 14.7                | Nup145c            | 193       | Nup145c   | 220       | 9.9                 |
|                             | Nup120              | 206       | Nup120    | 217       | 14.7                | Nup84              | 619       | Nup84     | 599       | 9.9                 |
|                             | Nup133              | 488       | Nup133    | 442       | 14.5                | Nup84              | 592       | Nup84     | 626       | 9.7                 |
|                             | Nup133              | 115       | Nup133    | 59        | 14.3                | Nup120             | 17        | Nup120    | 421       | 9.6                 |
|                             | Nup145c             | 227       | Nup145c   | 183       | 14.2                | Nup84              | 143       | Nup84     | 173       | 7.9                 |
|                             | Nup120              | 972       | Nup120    | 963       | 14.2                | Nup133             | 171       | Nup133    | 195       | 7.2                 |
|                             | Nup145c             | 204       | Nup145c   | 532       | 13.9                | Sec13              | 22        | Sec13     | 39        | 6.4                 |
|                             | Nup84               | 66        | Nup84     | 382       | 13.4                | Sec13              | 2         | Sec13     | 41        | 5.3                 |
|                             | Nup85               | 102       | Nup85     | 163       | 13.4                | Nup133             | 171       | Nup133    | 197       | 5.1                 |
|                             | Seh1                | 1         | Seh1      | 40        | 13.4                |                    |           |           |           |                     |
|                             | Nup84               | 460       | Nup84     | 20        | 12.9                |                    |           |           |           |                     |
|                             | Sec13               | 44        | Sec13     | 2         | 12.8                |                    |           |           |           |                     |
|                             | Seh1                | 182       | Seh1      | 198       | 12.5                |                    |           |           |           |                     |
|                             | Sec13               | 244       | Sec13     | 288       | 12.3                |                    |           |           |           |                     |
|                             | Nup84               | 114       | Nup84     | 107       | 12.2                |                    |           |           |           |                     |
|                             | Nup120              | 17        | Nup120    | 412       | 12.2                |                    |           |           |           |                     |
|                             | Nup120              | 400       | Nup120    | 530       | 11.8                |                    |           |           |           |                     |
|                             | Sec13               | 288       | Sec13     | 245       | 11.4                |                    |           |           |           |                     |
|                             | Nup84               | 592       | Nup84     | 625       | 11.3                |                    |           |           |           |                     |
|                             | Nup85               | 85        | Nup85     | 64        | 11.3                |                    |           |           |           |                     |
|                             | Nup85               | 247       | Nup85     | 345       | 11.0                |                    |           |           |           |                     |
|                             | Nup85               | 536       | Nup85     | 564       | 10.5                |                    |           |           |           |                     |
|                             | Nup145c             | 360       | Nup145c   | 353       | 10.5                |                    |           |           |           |                     |
|                             | Nup84               | 669       | Nup84     | 676       | 10.2                |                    |           |           |           |                     |
|                             | Nup145c             | 163       | Nup145c   | 174       | 10.1                |                    |           |           |           |                     |
|                             | Nup120              | 384       | Nup120    | 362       | 9.4                 |                    |           |           |           |                     |
|                             | Nup85               | 231       | Nup85     | 238       | 8.8                 |                    |           |           |           |                     |
|                             | Nup85               | 729       | Nup85     | 734       | 8.5                 |                    |           |           |           |                     |
|                             | Sec13               | 288       | Sec13     | 249       | 8.3                 |                    |           |           |           |                     |
|                             | Seh1                | 236       | Seh1      | 212       | 7.9                 |                    |           |           |           |                     |
|                             | Seh1                | 82        | Seh1      | 100       | 6.9                 |                    |           |           |           |                     |
|                             | Nup145c             | 236       | Nup145c   | 219       | 6.6                 |                    |           |           |           |                     |
|                             | Seh1                | 108       | Seh1      | 79        | 6.2                 |                    |           |           |           |                     |
|                             | Nup85               | 729       | Nup85     | 733       | 6.1                 |                    |           |           |           |                     |
|                             | Nup133              | 973       | Nup133    | 976       | 5.2                 |                    |           |           |           |                     |
|                             | Nup133              | 966       | Nup133    | 963       | 4.7                 |                    |           |           |           |                     |
|                             | Sec13               | 186       | Sec13     | 172       | 4.4                 |                    |           |           |           |                     |

**Supplemental Table S3. (B) The median distances of the intra-molecular cross-links calculated using the 6,520 solutions**

Violated cross-links are highlighted in orange.

| <b>Number of constrained interfaces</b> | <b>Cluster Index</b> | <b>Number of structures</b> | <b>Precision (dRMSD) [Å]</b> |
|-----------------------------------------|----------------------|-----------------------------|------------------------------|
| 3                                       | 1                    | 1,257                       | 15.4                         |
|                                         | 2                    | 1,010                       | 12.7                         |
| 0                                       | 1                    | 577                         | 14.8                         |
|                                         | 2                    | 404                         | 10.8                         |

**Supplemental Table S4. Precisions calculated on the hub region**

The precisions of each dominant cluster of solutions, obtained with and without the 3 crystallographic dimer constraints, were calculated considering only the five subunits in the hub region.

| <b>Number of constrained interfaces</b> | <b>Cluster Index</b> | <b>Number of structures</b> | <b>Precision (dRMSD) [Å]</b> |
|-----------------------------------------|----------------------|-----------------------------|------------------------------|
| 3                                       | 1                    | 5,064                       | 17.3                         |
|                                         | 2                    | 1,475                       | 17.3                         |
| 0                                       | 1                    | 2,885                       | 17.3                         |
|                                         | 2                    | 1,401                       | 19.2                         |

**Supplemental Table S5. Overall precisions of the solutions**

The precisions of each dominant cluster of solutions, obtained with and without the 3 crystallographic dimer constraints, were calculated considering all subunits of the Nup84 complex.

| <b>Nup84 complex components</b> | <b>Estimated Volume (from sequence)</b> | <b>Volume Threshold (x 2.5)</b> | <b>Residue number begins at</b> | <b>Residue number ends at</b> |
|---------------------------------|-----------------------------------------|---------------------------------|---------------------------------|-------------------------------|
| <b>Nup84</b>                    | 110,189                                 | 275,473                         | 1                               | 726                           |
| <b>Nup85</b>                    | 102,719                                 | 256,798                         | 1                               | 744                           |
| Nup120-NTD                      | 98,861                                  | 247,153                         | 1                               | 712                           |
| Nup120-CTD                      | 45,771                                  | 114,428                         | 713                             | 1037                          |
| <b>Nup120 (whole)</b>           | 144,632                                 | 361,580                         | 1                               | 1037                          |
| <b>Nup133</b>                   | 161,305                                 | 403,263                         | 1                               | 1157                          |
| Nup145c-NTD                     | 16,617                                  | 41,543                          | 1                               | 125                           |
| Nup145c-middle                  | 59,693                                  | 149,233                         | 126                             | 553                           |
| Nup145c-CTD                     | 21,819                                  | 54,548                          | 554                             | 712                           |
| <b>Nup145c (whole)</b>          | 98,129                                  | 245,323                         | 1                               | 712                           |
| <b>Seh1</b>                     | 47,336                                  | 118,340                         | 1                               | 349                           |
| <b>Sec13</b>                    | 39,980                                  | 99,950                          | 1                               | 297                           |
| <b>Entire Nup84 complex</b>     | 704,290                                 | 1,760,725                       |                                 |                               |

**Supplemental Table S6. Volume thresholds used for the localization density maps of the Nup84 complex components**

The volume of each Nup84 complex component was estimated from sequence in the units of Å<sup>3</sup> (<http://www.basic.northwestern.edu/biotools/proteincalc.html>). Each volume was then multiplied by 2.5 to obtain the volume threshold for contouring the localization density map.

| Rank | log(e) | log(l) | Coverage % | unique peptide | total peptide | Mr    | Accession      | Description           |
|------|--------|--------|------------|----------------|---------------|-------|----------------|-----------------------|
| 1    | -466.3 | 7.34   | 34         | 49             | 102           | 133.2 | YKR082W        | NUP133                |
| 2    | -430.4 | 7.6    | 24         | 41             | 97            | 145.6 | YGL092W        | NUP145                |
| 3    | -343.1 | 7.56   | 36         | 37             | 92            | 83.6  | YDL116W        | NUP84                 |
| 4    | -305.3 | 7.27   | 29         | 35             | 71            | 120.4 | YKL057C        | NUP120                |
| 5    | -239.8 | 7.5    | 73         | 24             | 62            | 33    | YLR208W        | SEC13                 |
| 6    | -223.9 | 6.79   | 32         | 25             | 58            | 84.8  | YJR042W        | NUP85                 |
| 7    | -223.7 | 7.51   | 52         | 24             | 62            | 39.1  | YGL100W        | SEH1                  |
| 8    | -121.7 | 5.92   | 24         | 14             | 21            | 69.2  | sp ALBU_BOVIN  | Serum albumins        |
| 9    | -41.8  | 6.2    | 20         | 6              | 10            | 35.8  | YJR009C        | TDH2                  |
| 10   | -38.4  | 5.55   | 6.6        | 4              | 7             | 69.4  | YLL024C        | SSA2                  |
| 11   | -34.2  | 6.34   | 20         | 3              | 14            | 25.4  | sp TRY1_BOVIN  | Cationic trypsin      |
| 12   | -22.5  | 5.11   | 8.7        | 4              | 5             | 44.7  | YCR012W        | PGK1                  |
| 13   | -19    | 4.71   | 5.2        | 3              | 3             | 66.6  | YDL229W        | SSB1                  |
| 14   | -15.2  | 4.89   | 4.6        | 3              | 3             | 59.5  | sp K1C10_HUMAN | K1C10_HUMAN (keratin) |
| 15   | -11.9  | 5.28   | 3.9        | 2              | 3             | 50    | YBR118W        | TEF2                  |
| 16   | -11.6  | 5.06   | 18         | 2              | 4             | 14.5  | YIL148W        | RPL40A                |
| 17   | -9.9   | 4.75   | 7.5        | 2              | 2             | 28.8  | YML063W        | RPS1B                 |
| 18   | -9.7   | 4.46   | 6.4        | 2              | 2             | 33.7  | YLR340W        | RPP0                  |
| 19   | -9.4   | 4.45   | 2.8        | 2              | 3             | 65.8  | sp K2C1_HUMAN  | K2C1_HUMAN (keratin)  |
| 20   | -9     | 4.83   | 5          | 2              | 2             | 34.2  | YLR018C        | POM34                 |
| 21   | -8.7   | 5.06   | 15         | 2              | 2             | 14.5  | YCR031C        | RPS14A                |
| 22   | -6.3   | 4.69   | 10         | 2              | 2             | 18.2  | YBR191W        | RPL21A                |
| 23   | -6     | 4.39   | 3.8        | 1              | 1             | 29.4  | YHR203C        | RPS4B                 |
| 24   | -4.5   | 4.12   | 1.7        | 1              | 1             | 74.1  | YML031W        | NDC1                  |
| 25   | -4.1   | 5.02   | 4.2        | 1              | 2             | 26.5  | YNL178W        | RPS3                  |
| 26   | -4     | 4.73   | 1.6        | 1              | 1             | 61.5  | YLR044C        | PDC1                  |
| 27   | -3.6   | 4.88   | 5.2        | 1              | 1             | 25.7  | YLR407W        | YLR407W               |
| 28   | -3.3   | 4.95   | 2          | 1              | 1             | 37.6  | YBR145W        | ADH5                  |
| 29   | -3.3   | 4.48   | 2.5        | 1              | 2             | 39.6  | YKL060C        | FBA1                  |
| 30   | -3.1   | 4.53   | 2.5        | 1              | 1             | 34.8  | YMR116C        | ASC1                  |
| 31   | -3     | 4.12   | 1.8        | 1              | 2             | 72    | YLL004W        | ORC3                  |
| 32   | -2.8   | 4.44   | 2.7        | 1              | 1             | 32.9  | YDR233C        | RTN1                  |
| 33   | -2.7   | 3.88   | 4.3        | 1              | 1             | 27.4  | YFR031C-A      | RPL2A                 |
| 34   | -2.6   | 4.13   | 6.6        | 1              | 1             | 17    | YDR064W        | RPS13                 |
| 35   | -2.3   | 3.9    | 0.5        | 1              | 1             | 303.3 | YLR454W        | FMP27                 |
| 36   | -2.2   | 5.18   | 2.1        | 1              | 2             | 46.9  | YHR174W        | ENO2                  |
| 37   | -2     | 4.85   | 1.3        | 1              | 4             | 60.5  | YHR207C        | SET5                  |
| 38   | -2     | 4.37   | 5.8        | 1              | 1             | 17.7  | YBR048W        | RPS11B                |
| 39   | -1.9   | 4.55   | 4.8        | 1              | 1             | 27.9  | YLR048W        | RPS0B                 |
| 40   | -1.9   | 3.98   | 0.6        | 1              | 2             | 93    | YLL034C        | RIX7                  |
| 41   | -1.8   | 4.38   | 4.4        | 1              | 1             | 25    | YJR123W        | RPS5                  |
| 42   | -1.8   | 4.37   | 4.2        | 1              | 1             | 46.4  | YLR225C        | YLR225C               |
| 43   | -1.6   | 4.07   | 3.8        | 1              | 1             | 38.1  | YOL151W        | GRE2                  |
| 44   | -1.6   | 4.64   | 3.3        | 1              | 1             | 57.2  | YMR131C        | RRB1                  |
| 45   | -1.6   | 4.95   | 1.9        | 1              | 1             | 82    | YMR237W        | BCH1                  |
| 46   | -1.5   | 4.45   | 1.5        | 1              | 1             | 62    | YMR199W        | CLN1                  |
| 47   | -1.4   | 4.42   | 6.9        | 1              | 1             | 22.7  | YMR264W        | CUE1                  |
| 48   | -1.4   | 4.89   | 1.3        | 1              | 1             | 77.5  | YLR260W        | LCB5                  |
| 49   | -1.4   | 3.72   | 0.6        | 1              | 1             | 130.8 | YGL006W        | PMC1                  |
| 50   | -1.4   | 4.15   | 8.5        | 1              | 1             | 8.9   | YHR021C        | RPS27B                |
| 51   | -1.3   | 4.72   | 1.9        | 1              | 1             | 91.9  | YDL126C        | CDC48                 |
| 52   | -1.3   | 3.72   | 4.8        | 1              | 1             | 29.9  | YNL312W        | RFA2                  |
| 53   | -1.3   | 4.8    | 2.7        | 1              | 1             | 40.2  | YBR076W        | ECM8                  |
| 54   | -1.3   | 4.4    | 1.8        | 1              | 1             | 54.5  | YAL038W        | CDC19                 |
| 55   | -1.2   | 4.12   | 4.8        | 1              | 1             | 17.8  | YEL054C        | RPL12A                |
| 56   | -1.2   | 5.08   | 2.6        | 1              | 1             | 56.1  | YGL202W        | ARO8                  |
| 57   | -1.2   | 4.31   | 3.2        | 1              | 1             | 52.6  | YMR153W        | NUP53                 |
| 58   | -1.2   | 3.41   | 4.1        | 1              | 1             | 16.7  | YKL066W        | YKL066W               |
| 59   | -1.1   | 5.13   | 3.6        | 1              | 1             | 15.8  | YER050C        | RSM18                 |
| 60   | -1.1   | 4.84   | 2.8        | 1              | 1             | 42.3  | Q0075          | AI5_BETA              |
| 61   | -1.1   | 5.84   | 1.5        | 1              | 2             | 140.8 | YPL137C        | GIP3                  |
| 62   | -1.1   | 4.59   | 6.5        | 1              | 1             | 32.1  | YDR287W        | YDR287W               |
| 63   | -1.1   | 4.25   | 0.4        | 1              | 1             | 190.4 | YER190W        | YRF1-2                |
| 64   | -1     | 3.53   | 1.1        | 1              | 1             | 114.9 | YBL037W        | APL3                  |

**Supplemental Table S7. Protein partners of the Nup84 complex identified by X!Tandem.** The FPR of the identification was estimated to be 0.79%.

## SUPPLEMENTAL FIGURES

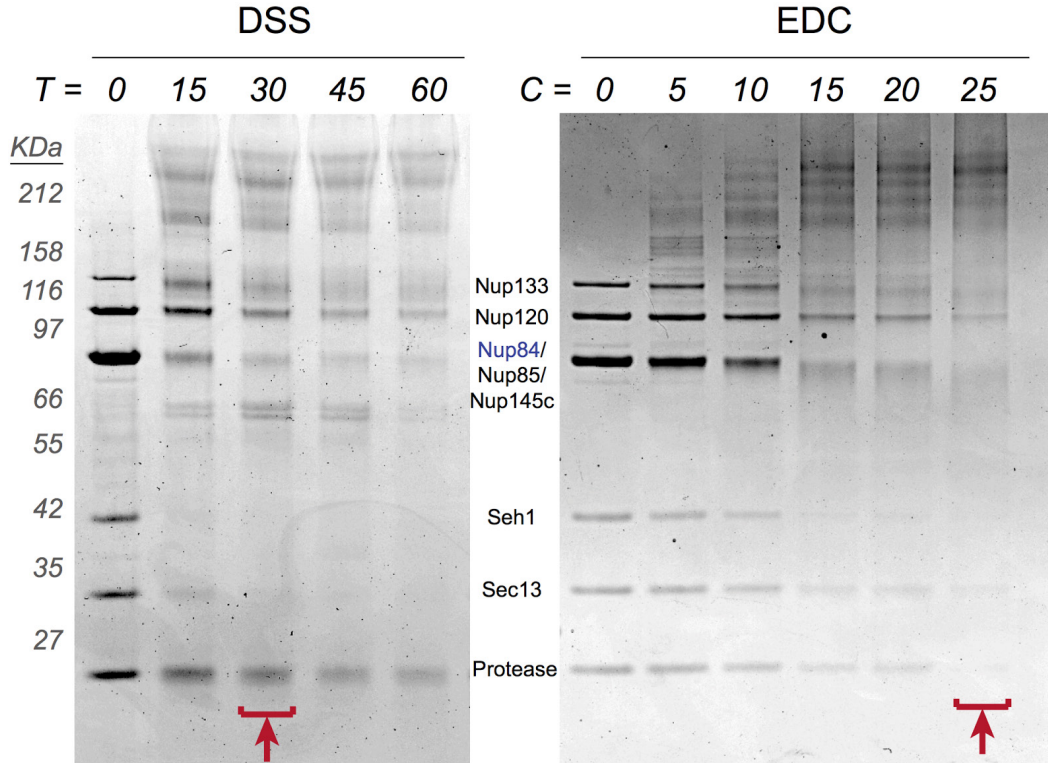

### Supplemental Figure S1. Nup84 complex pullout and optimized cross-linking titrations by either DSS or EDC cross-linker

The Nup84 complex was immuno-purified, natively eluted, and titrated to find the optimal cross-linking conditions that show shifting of the complex bands without causing over-crosslinking. On the left, SDS-PAGE gel showing cross-linking titration using 1 mM DSS and different time points (T, in minutes). On the right side, SDS-PAGE gel showing cross-linking titration using increasing concentrations (C, in mM) of EDC. Approximately 0.5  $\mu$ g of complex per point were used. The time or concentration point selected for further analysis is identified with a red line and arrow. The identity of the proteins is shown in the middle (tagged protein in blue) and the molecular size reference on the left.



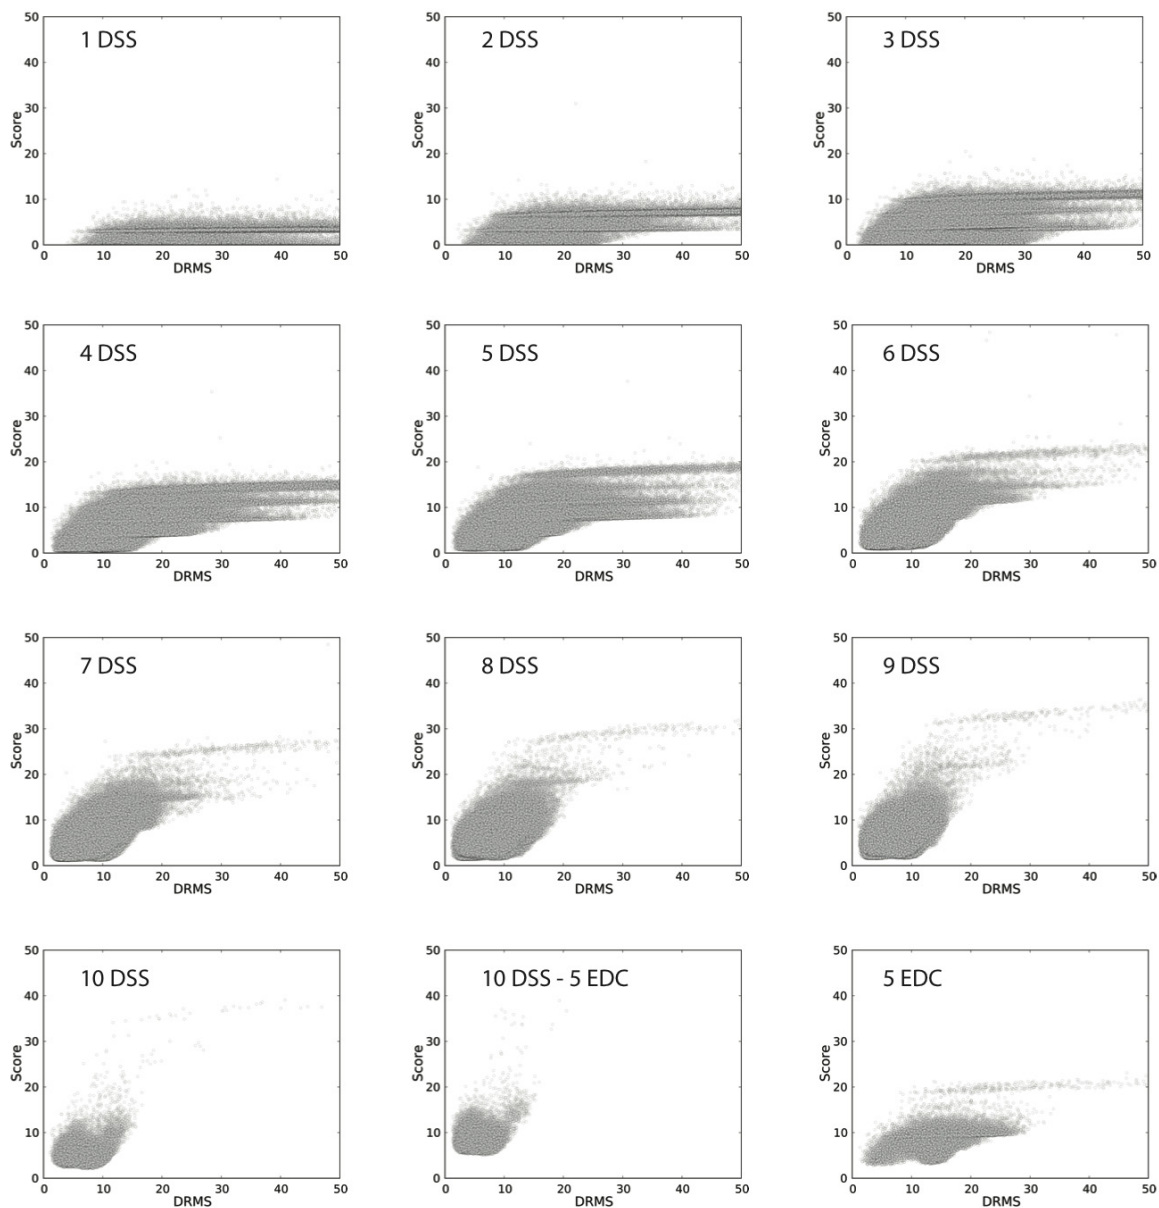

**Supplemental Figure S2. Correlation between the number of cross-links and the accuracy of dimer models**

Scores (*i.e.*, the sum of excluded volume and cross-link restraint scores) are plotted as a function of the  $C_{\alpha}$  dRMSD of the Nup145c-Sec13 dimer models with respect to the crystallographic interface (PDB code 3IKO (9)).

| 7 Components |  | 10 Rigid domains                                                                                                                                                                                                                   | 81 Segments                                                             |                                                                        |                                                          |         |                   |
|--------------|--|------------------------------------------------------------------------------------------------------------------------------------------------------------------------------------------------------------------------------------|-------------------------------------------------------------------------|------------------------------------------------------------------------|----------------------------------------------------------|---------|-------------------|
|              |  |                                                                                                                                                                                                                                    | 39 structured segments with templates                                   |                                                                        | 42 disordered and/or unknown segments without a template |         |                   |
|              |  |                                                                                                                                                                                                                                    | begins at                                                               | ends at                                                                | begins at                                                | ends at | 64 flexible beads |
| Nup 84       |  | <b>Nup84 (1-726)</b>                                                                                                                                                                                                               | 7 - 20                                                                  | 1 - 6                                                                  | 1                                                        |         |                   |
|              |  | 1-6: flexible string of a bead (DISOPRED)<br>7-436: X-ray 3JRO_C, 3IKO_C (100% seq id)<br>429-488: Model 3F3F_G (10% seq id, HHpred)<br>489-505: flexible string of beads (DISOPRED)<br>506-726: Model 3CQC_A (18% seq id, HHpred) | 27 - 80<br>96 - 126<br>136 - 364<br>372 - 484<br>506 - 562<br>575 - 726 | 21 - 26<br>81 - 95<br>127 - 135<br>365 - 371<br>485 - 505<br>563 - 574 | 1<br>1<br>1<br>1<br>2<br>1                               |         |                   |
| Nup 85       |  | <b>Nup85 NTD (1-529)</b>                                                                                                                                                                                                           | 44 - 122                                                                | 1 - 43                                                                 | 3                                                        |         |                   |
|              |  | 1-43: flexible string of beads (DISOPRED)<br>44-555: X-ray 3F3F_D, 3EWE_D (100% seq id)                                                                                                                                            | 135 - 427<br>461 - 529                                                  | 123 - 134<br>428 - 460                                                 | 1<br>2                                                   |         |                   |
|              |  | <b>Linker (flexible string of a bead)</b>                                                                                                                                                                                          |                                                                         | 530 - 532                                                              | 1                                                        |         |                   |
| Nup120       |  | <b>Nup120 NTD (1-712)</b>                                                                                                                                                                                                          | 1 - 29                                                                  | 30 - 52                                                                | 2                                                        |         |                   |
|              |  | 1-712: X-ray 3F7F_A, 3HXR_A (100% seq id)                                                                                                                                                                                          | 53 - 212<br>221 - 305<br>311 - 429<br>440 - 712                         | 213 - 220<br>306 - 310<br>430 - 439<br>712 - 726                       | 1<br>1<br>1<br>1                                         |         |                   |
|              |  | <b>Linker (flexible string of a bead)</b>                                                                                                                                                                                          |                                                                         | 713 - 726                                                              | 1                                                        |         |                   |
| Nup133       |  | <b>Nup120 CTD (727-1037)</b>                                                                                                                                                                                                       | 727 - 781                                                               | 782 - 804                                                              | 2                                                        |         |                   |
|              |  | 727-1037: Model 4FHN_B, 4FHN_D (14% seq id, HHpred)                                                                                                                                                                                | 805 - 892<br>903 - 910<br>921 - 1010<br>1023 - 1037                     | 893 - 902<br>911 - 920<br>1011 - 1022                                  | 1<br>1<br>1                                              |         |                   |
|              |  | <b>Nup133 NTD (1-480)</b>                                                                                                                                                                                                          | 56 - 78<br>86 - 125<br>133 - 144                                        | 79 - 85<br>126 - 132<br>145 - 161                                      | 1<br>1<br>1                                              |         |                   |
| Nup 145c     |  | 1-55: flexible string of beads (DISOPRED)<br>56-480: Model VpNup133 (in press) (46% seq id, Muscle)                                                                                                                                | 162 - 184<br>193 - 200<br>206 - 249<br>258 - 480                        | 185 - 192<br>201 - 205<br>250 - 257                                    | 1<br>1<br>1                                              |         |                   |
|              |  | <b>Linker (flexible string of a bead)</b>                                                                                                                                                                                          |                                                                         | 481 - 489                                                              | 1                                                        |         |                   |
|              |  | <b>Nup133 CTD (490-1157)</b>                                                                                                                                                                                                       | 490 - 763<br>772 - 1155                                                 | 764 - 771<br>1156 - 1157                                               | 1<br>1                                                   |         |                   |
| Nup 145c     |  | <b>Nup145c (1-712)</b>                                                                                                                                                                                                             | 126 - 144<br>151 - 175<br>182 - 553                                     | 1 - 125<br>145 - 150<br>176 - 181<br>554 - 712                         | 7<br>1<br>1<br>8                                         |         |                   |
|              |  | 1:125: flexible string of beads (DISOPRED)<br>126-553: X-ray 3IKO_B, 3JRO_A, 3BG1_B, 3BG0_B (100% seq id)<br>554-712: flexible string of beads (PSIPRED)                                                                           |                                                                         |                                                                        |                                                          |         |                   |
| Seh1         |  | <b>Seh1 (1-349)</b>                                                                                                                                                                                                                | 1 - 248<br>288 - 346                                                    | 249 - 287<br>347 - 349                                                 | 2<br>1                                                   |         |                   |
| Sec 13       |  | <b>Sec13 (1-297)</b>                                                                                                                                                                                                               | 2 - 158<br>166 - 296                                                    | 159 - 165<br>297 - 297                                                 | 1<br>1<br>1                                              |         |                   |
|              |  | 1: flexible string of a bead (DISOPRED)<br>2-296: X-ray 2PM7_D (100% seq id)<br>297: flexible string of a bead (DISOPRED)                                                                                                          |                                                                         |                                                                        |                                                          |         |                   |

### Supplemental Figure S3. Representation of the Nup84 complex proteins for integrative modeling

The domains of the Nup84 complex subunits were represented by beads of varying sizes, arranged into either a rigid-body (column 4) or a flexible string (column 5), based on the available crystallographic structures and comparative models. The linkers between rigid bodies are highlighted in red, in column 5. The atomic structures for some

of the yeast Nup84 complex components and their close homologs have been previously determined by X-ray crystallography (9-19). For predicted non-disordered domains of the remaining sequences, comparative models were built with MODELLER 9.13 (20) based on the closest known structure detected by HHPred (21, 22) and the literature. Secondary structure and disordered regions were predicted by PSIPRED (23, 24) and DISOPRED (25), respectively.

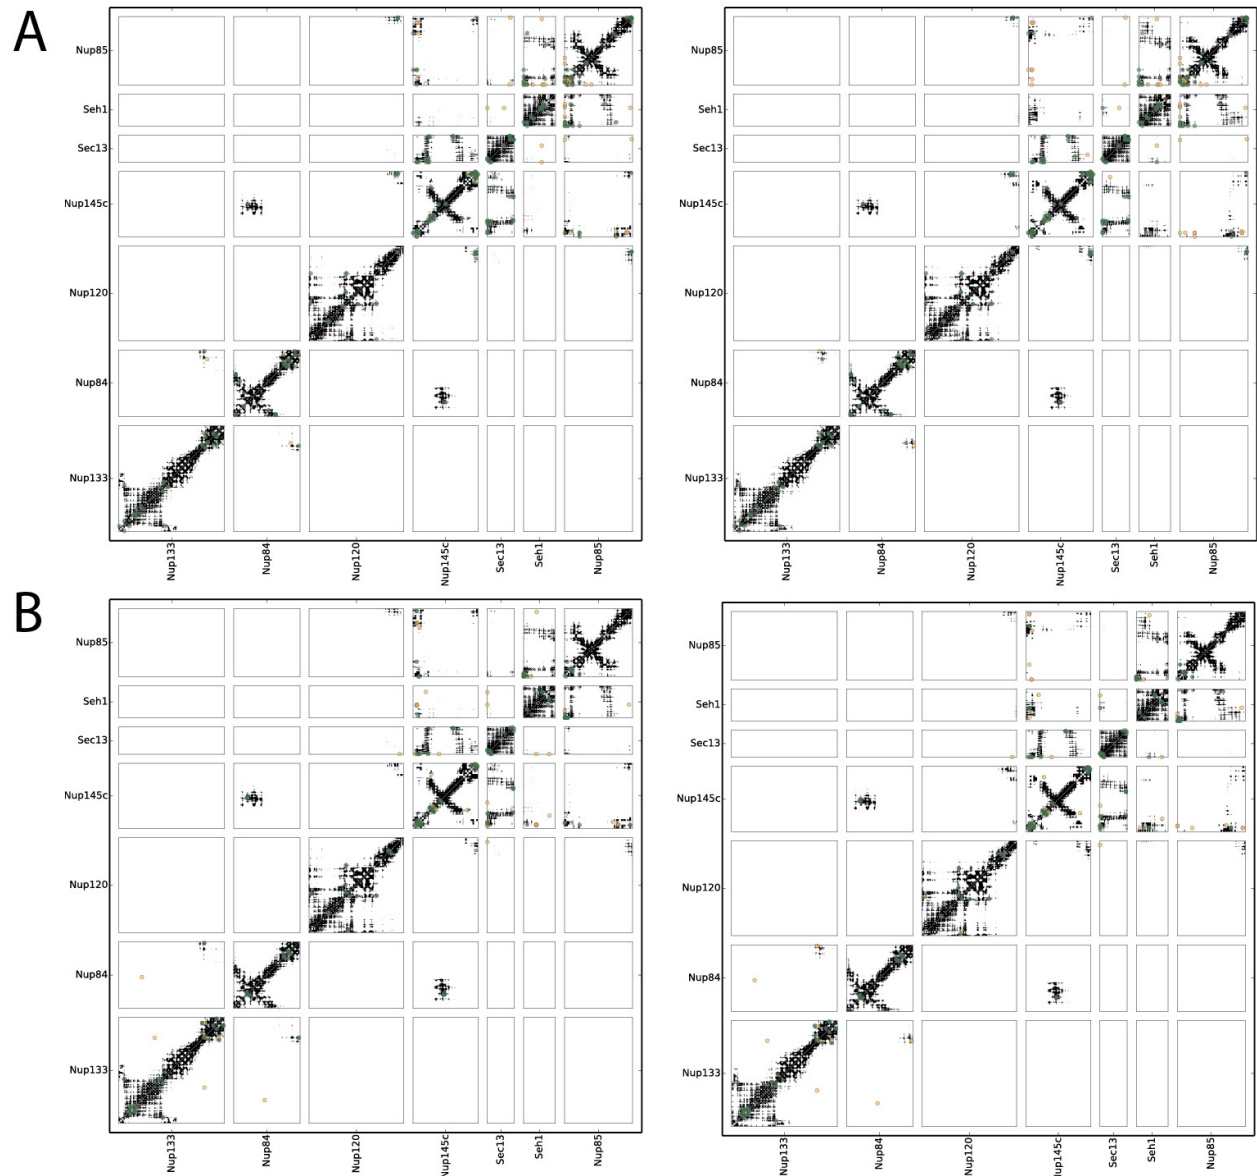

**Supplemental Figure S4. The cross-link validation and normalized contact frequency maps**

(A) Validation of the 163 DSS cross-links (green circle=satisfied, orange circle=violated), and the normalized contact frequency (scaled in black dots) are plotted together for each of the two clusters (left and right columns, respectively). The three crystallographic interfaces were constrained for generating the two clusters.

(B) Validation of the 123 EDC cross-links (green circle=satisfied, orange

circle=violated), and the normalized contact frequency (scaled in black dots) are plotted together for each of the two clusters (left and right columns, respectively). The three crystallographic interfaces were constrained for generating the two clusters.

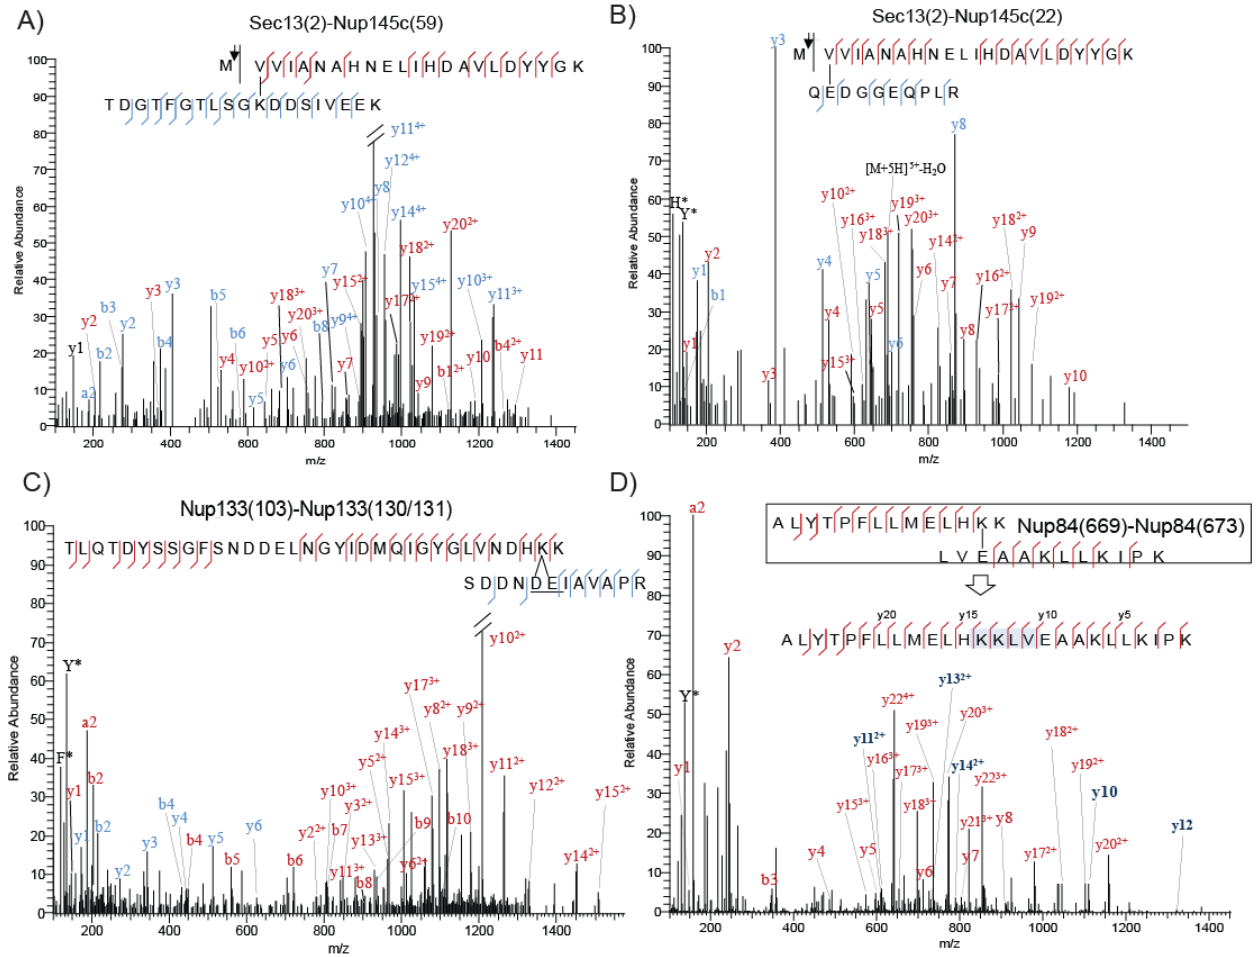

### Supplemental Figure S5. The MS/MS spectra of cross-linked peptides

(A) A representative HCD MS/MS spectrum of DSS cross-link ( $m/z=899.052$ ,  $z=5$ ) between the second residue of Sec13 (after cleavage of N-terminal methionine) and lysine 59 of Nup145c. b and y ions are labeled accordingly.

(B) A representative HCD MS/MS spectrum of EDC cross-link ( $m/z=693.547$ ,  $z=5$ ) between the 2nd residue of Sec13 and glutamic acid 22 of Nup145c. H\* and Y\* indicate immonium ions of histidine and tyrosine, respectively.

(C) A representative ambiguous EDC cross-link spectrum ( $m/z=1025.273$ ,  $z=5$ ) in which either aspartic acid 130 or glutamic acid 131 is potentially cross-linked.

(D) A representative MS/MS spectrum ( $m/z=602.573$ ,  $z=5$ ) of a false positive EDC cross-link of Nup84(669) - Nup84(673) identified by the software. The peptide was misassigned as an intra-molecular EDC cross-link and could be distinguished by the y ions (y10-y14).

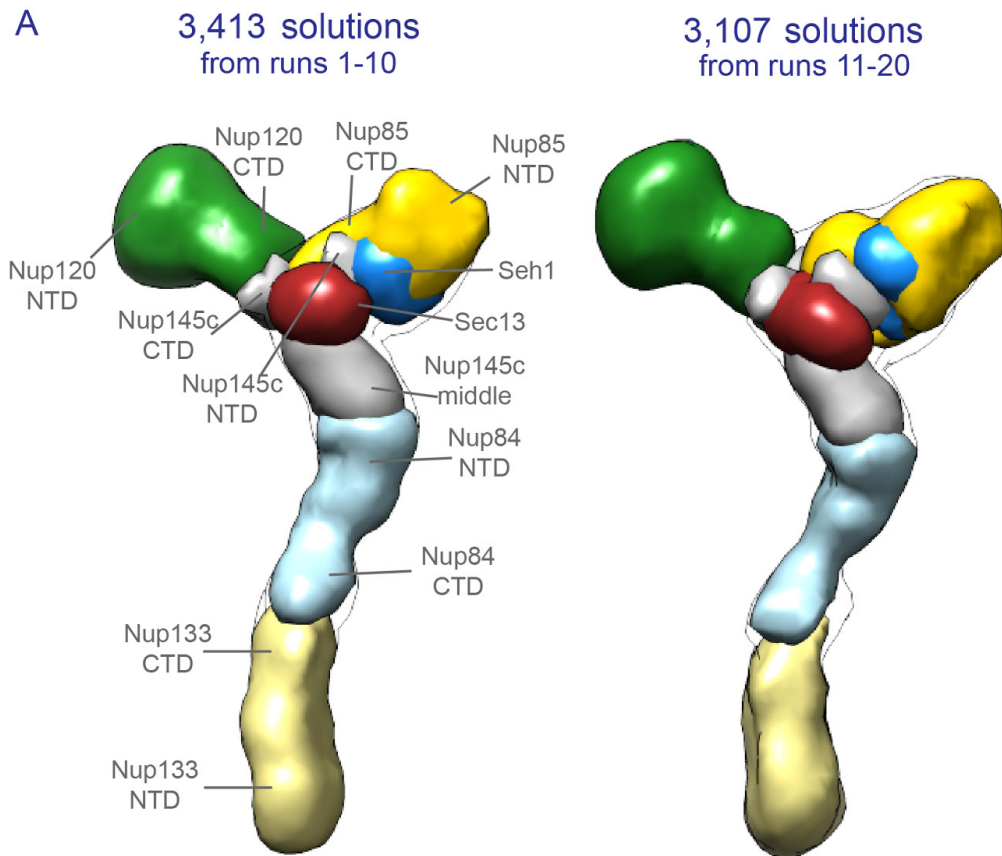

**Supplemental Figure S6. Thoroughness of sampling good-scoring solutions**

(A) The thoroughness of configurational sampling was assessed by comparing a subset of 3,413 solutions from runs 1-10 to another subset of 3,107 solutions from independent runs 11-20. Each subset of solutions was converted into a density map of any volume element being occupied by a given protein (the ‘localization density map’) using VMD (26), contoured at the threshold that results in 2.5 times its volume estimated from sequence (Supplemental Table S6). Importantly, the two localization density maps were similar to each other, demonstrating that the sampling is likely to have sampled well all solutions that satisfy the input restraints.



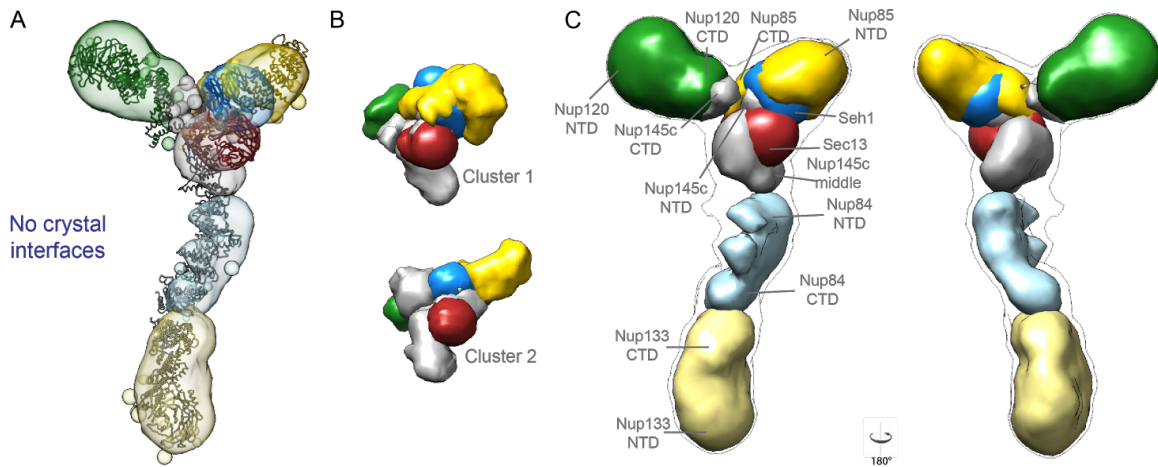

**Supplemental Figure S7. An ensemble of solutions without constraining the 3 crystallographic interfaces**

Modeling calculations were repeated by omitting the three crystallographic interface constraints (14, 18, 27). The localization density maps of the Nup84 subunits (solid contour surfaces) and the entire complex (transparent surfaces) were then computed using the resulting 4,286 solutions, and contoured at the threshold of approximately 3 times its volume estimated from sequence. The similarity of this localization probability map to that obtained with the 3 crystallographic interface constraints validates the *in vivo* relevance of the crystallographic interfaces.

(A) A representative single Nup84 complex structure (colored ribbon) is shown along with the localization density maps of the individual subunits.

(B) The localization density maps of the two clusters (comprising 577 and 404 solutions, respectively) computed on the hub region (Nup120-CTD, Nup85, Nup145c, Sec13, and Seh1) are shown.

(C) Front and back views of the localization density maps of the Nup84 subunits and the entire complex.

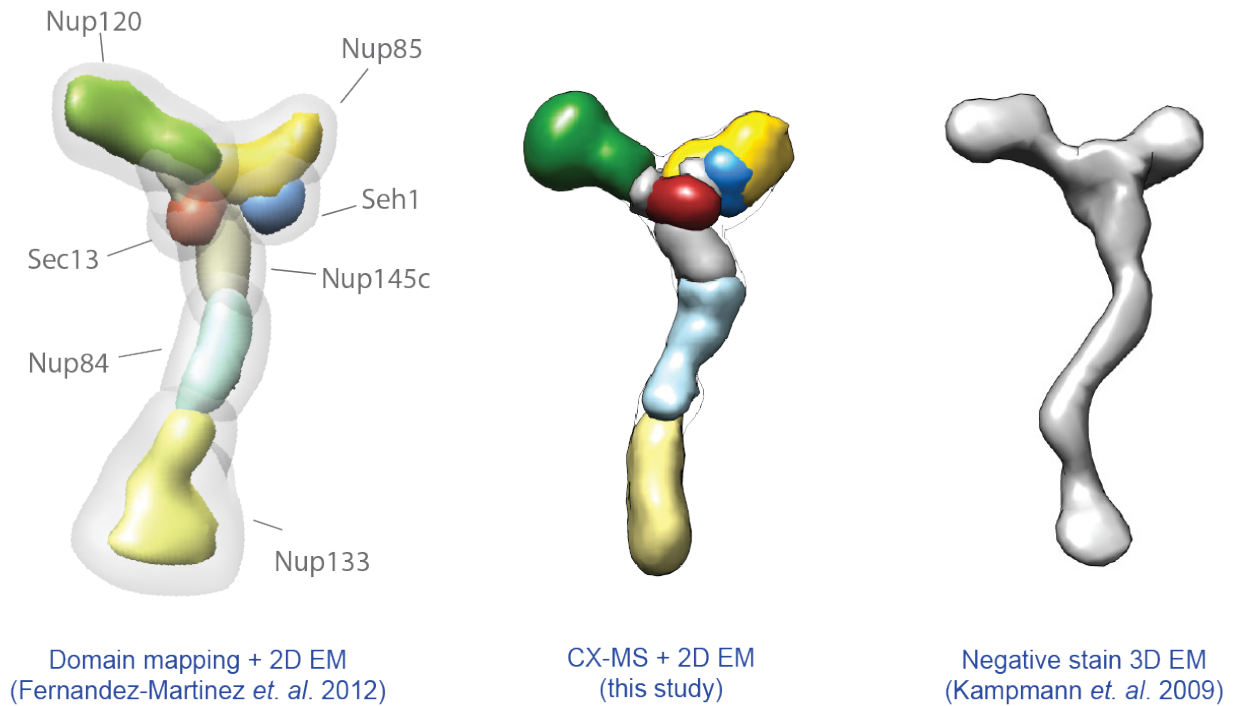

**Supplemental Figure S8. Assessment of the CX-MS integrative Nup84 complex structure through comparison with previously determined structures using other sources of data**

(LEFT) For comparison, a localization density map in our previous study is shown, calculated primarily using the domain mapping data and the EM class average (27).

(MIDDLE) The molecular architecture presented in this study is shown, calculated primarily using the CX-MS and the EM class average.

(RIGHT) A negative-stain EM 3D map is shown for the same complex, generated from single particle EM reconstruction (28).

**For Supplemental Figures S9-S11, the annotated spectra are separately attached.**

**Supplemental Figure S9. 163 Unique MS/MS HCD spectra of DSS cross-links reported in the current study (prepared by spectrum viewer pLabel 2.4, attached separately)**

The MS2 tolerance is < 20 ppm.

**Supplemental Figure S10. 104 Unique MS/MS HCD spectra of EDC cross-links reported in this study (prepared by spectrum viewer pLabel 2.4, attached separately).**

The MS2 tolerance is < 20 ppm. We were unable to unambiguously locate the conjugation sites for ~20% of the EDC cross-links, because many result from peptides containing consecutive and/or adjacent carboxylic acids. These ambiguities were accounted for in our modeling calculations, resulting in 123 possible EDC cross-links used for further analysis.

**Supplemental Figure S11. A few examples of potential false positive identifications at expected 5% FDR after use of additional filters/ manual verification of the spectra (prepared by spectrum viewer pLabel 2.4, attached separately).**

The MS2 tolerance is < 20 ppm.

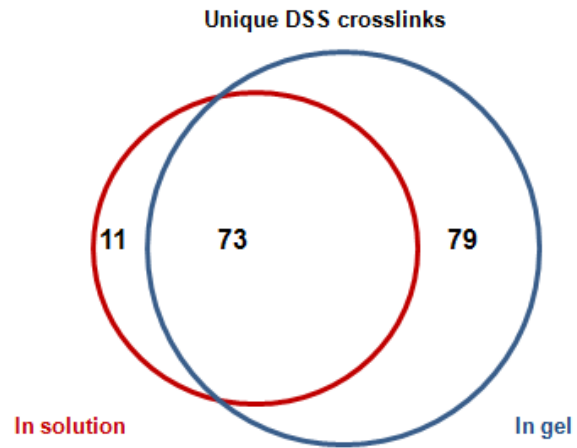

**Supplemental Figure S12. A comparison of in-gel and in solution digestion of the unique DSS cross-linked peptides identified from the Nup84 cross-linked samples.**

## SUPPLEMENTAL REFERENCES

1. Rieping, W., Habeck, M., and Nilges, M. (2005) Inferential structure determination. *Science* 309, 303-306
2. Erzberger, J., Stengel, F., Pellarin, R., Zhang, S., Schaefer, T., Aylett, C., Cimermancic, P., Boehringer, D., Sali, A., Aebersold, R., and Ban, N. (2014) Molecular architecture of the 40S-eIF1-eIF3 translation initiation complex. *Cell*, in press
3. Pellarin, R., Bonomi, M., Spill, Y., Nilges, M., DeGrado, W., and Sali, A. (in preparation) Modeling multiple structural states of macromolecules by cysteine cross-linking.
4. Schneidman-Duhovny, D., Rossi, A., Avila-Sakar, A., Kim, S. J., Velazquez-Muriel, J., Strop, P., Liang, H., Krukenberg, K. A., Liao, M., Kim, H. M., Sobhanifar, S., Dotsch, V., Rajpal, A., Pons, J., Agard, D. A., Cheng, Y., and Sali, A. (2012) A method for integrative structure determination of protein-protein complexes. *Bioinformatics (Oxford, England)* 28, 3282-3289
5. Velazquez-Muriel, J., Lasker, K., Russel, D., Phillips, J., Webb, B. M., Schneidman-Duhovny, D., and Sali, A. (2012) Assembly of macromolecular complexes by satisfaction of spatial restraints from electron microscopy images. *Proceedings of the National Academy of Sciences of the United States of America* 109, 18821-18826
6. Topf, M., Lasker, K., Webb, B., Wolfson, H., Chiu, W., and Sali, A. (2008) Protein structure fitting and refinement guided by cryo-EM density. *Structure* 16, 295-307
7. Saff, E. B., and Kuijlaars, A. B. J. (1997) Distributing many points on a sphere. *Mathematical Intelligencer* 19, 5-11
8. Ballard, D. H., and Brown, C. M. (1982) *Computer vision*, Prentice-Hall

9. Nagy, V., Hsia, K. C., Debler, E. W., Kampmann, M., Davenport, A. M., Blobel, G., and Hoelz, A. (2009) Structure of a trimeric nucleoporin complex reveals alternate oligomerization states. *Proceedings of the National Academy of Sciences of the United States of America* 106, 17693-17698
10. Berke, I. C., Boehmer, T., Blobel, G., and Schwartz, T. U. (2004) Structural and functional analysis of Nup133 domains reveals modular building blocks of the nuclear pore complex. *J Cell Biol* 167, 591-597
11. Whittle, J. R., and Schwartz, T. U. (2009) Architectural nucleoporins Nup157/170 and Nup133 are structurally related and descend from a second ancestral element. *The Journal of biological chemistry*
12. Boehmer, T., Jeudy, S., Berke, I. C., and Schwartz, T. U. (2008) Structural and functional studies of Nup107/Nup133 interaction and its implications for the architecture of the nuclear pore complex. *Molecular cell* 30, 721-731
13. Sampathkumar, P., Gheyi, T., Miller, S. A., Bain, K. T., Dickey, M., Bonanno, J. B., Kim, S. J., Phillips, J., Pieper, U., Fernandez-Martinez, J., Franke, J. D., Martel, A., Tsuruta, H., Atwell, S., Thompson, D. A., Emtage, J. S., Wasserman, S. R., Rout, M. P., Sali, A., Sauder, J. M., and Burley, S. K. (2011) Structure of the C-terminal domain of *Saccharomyces cerevisiae* Nup133, a component of the nuclear pore complex. *Proteins* 79, 1672-1677
14. Brohawn, S. G., and Schwartz, T. U. (2009) Molecular architecture of the Nup84-Nup145C-Sec13 edge element in the nuclear pore complex lattice. *Nat Struct Mol Biol* 16, 1173-1177
15. Seo, H. S., Ma, Y., Debler, E. W., Wacker, D., Kutik, S., Blobel, G., and Hoelz, A.

- (2009) Structural and functional analysis of Nup120 suggests ring formation of the Nup84 complex. *Proceedings of the National Academy of Sciences of the United States of America* 106, 14281-14286
16. Leksa, N. C., Brohawn, S. G., and Schwartz, T. U. (2009) The structure of the scaffold nucleoporin Nup120 reveals a new and unexpected domain architecture. *Structure* 17, 1082-1091
  17. Debler, E. W., Ma, Y., Seo, H. S., Hsia, K. C., Noriega, T. R., Blobel, G., and Hoelz, A. (2008) A fence-like coat for the nuclear pore membrane. *Molecular cell* 32, 815-826
  18. Brohawn, S. G., Leksa, N. C., Spear, E. D., Rajashankar, K. R., and Schwartz, T. U. (2008) Structural evidence for common ancestry of the nuclear pore complex and vesicle coats. *Science* 322, 1369-1373
  19. Fath, S., Mancias, J. D., Bi, X., and Goldberg, J. (2007) Structure and organization of coat proteins in the COPII cage. *Cell* 129, 1325-1336
  20. Sali, A., and Blundell, T. L. (1993) Comparative protein modelling by satisfaction of spatial restraints. *Journal of molecular biology* 234, 779-815
  21. Soding, J. (2005) Protein homology detection by HMM-HMM comparison. *Bioinformatics (Oxford, England)* 21, 951-960
  22. Soding, J., Biegert, A., and Lupas, A. N. (2005) The HHpred interactive server for protein homology detection and structure prediction. *Nucleic acids research* 33, W244-248
  23. Jones, D. T. (1999) Protein secondary structure prediction based on position-specific scoring matrices. *Journal of molecular biology* 292, 195-202

24. Buchan, D. W., Minneci, F., Nugent, T. C., Bryson, K., and Jones, D. T. (2013) Scalable web services for the PSIPRED Protein Analysis Workbench. *Nucleic acids research* 41, W349-357
25. Ward, J. J., McGuffin, L. J., Bryson, K., Buxton, B. F., and Jones, D. T. (2004) The DISOPRED server for the prediction of protein disorder. *Bioinformatics (Oxford, England)* 20, 2138-2139
26. Humphrey, W., Dalke, A., and Schulten, K. (1996) VMD: visual molecular dynamics. *Journal of molecular graphics* 14, 33-38, 27-38
27. Fernandez-Martinez, J., Phillips, J., Sekedat, M. D., Diaz-Avalos, R., Velazquez-Muriel, J., Franke, J. D., Williams, R., Stokes, D. L., Chait, B. T., Sali, A., and Rout, M. P. (2012) Structure-function mapping of a heptameric module in the nuclear pore complex. *J Cell Biol* 196, 419-434
28. Kampmann, M., and Blobel, G. (2009) Three-dimensional structure and flexibility of a membrane-coating module of the nuclear pore complex. *Nat Struct Mol Biol* 16, 782-788
