# Supplementary material
Source: PubMed Central journal article supplement (PMC4223482)
Supplement: supp_M114.041673_mcp.M114.041673-2.pdf [file supp_M114.041673_mcp.M114.041673-2.pdf]

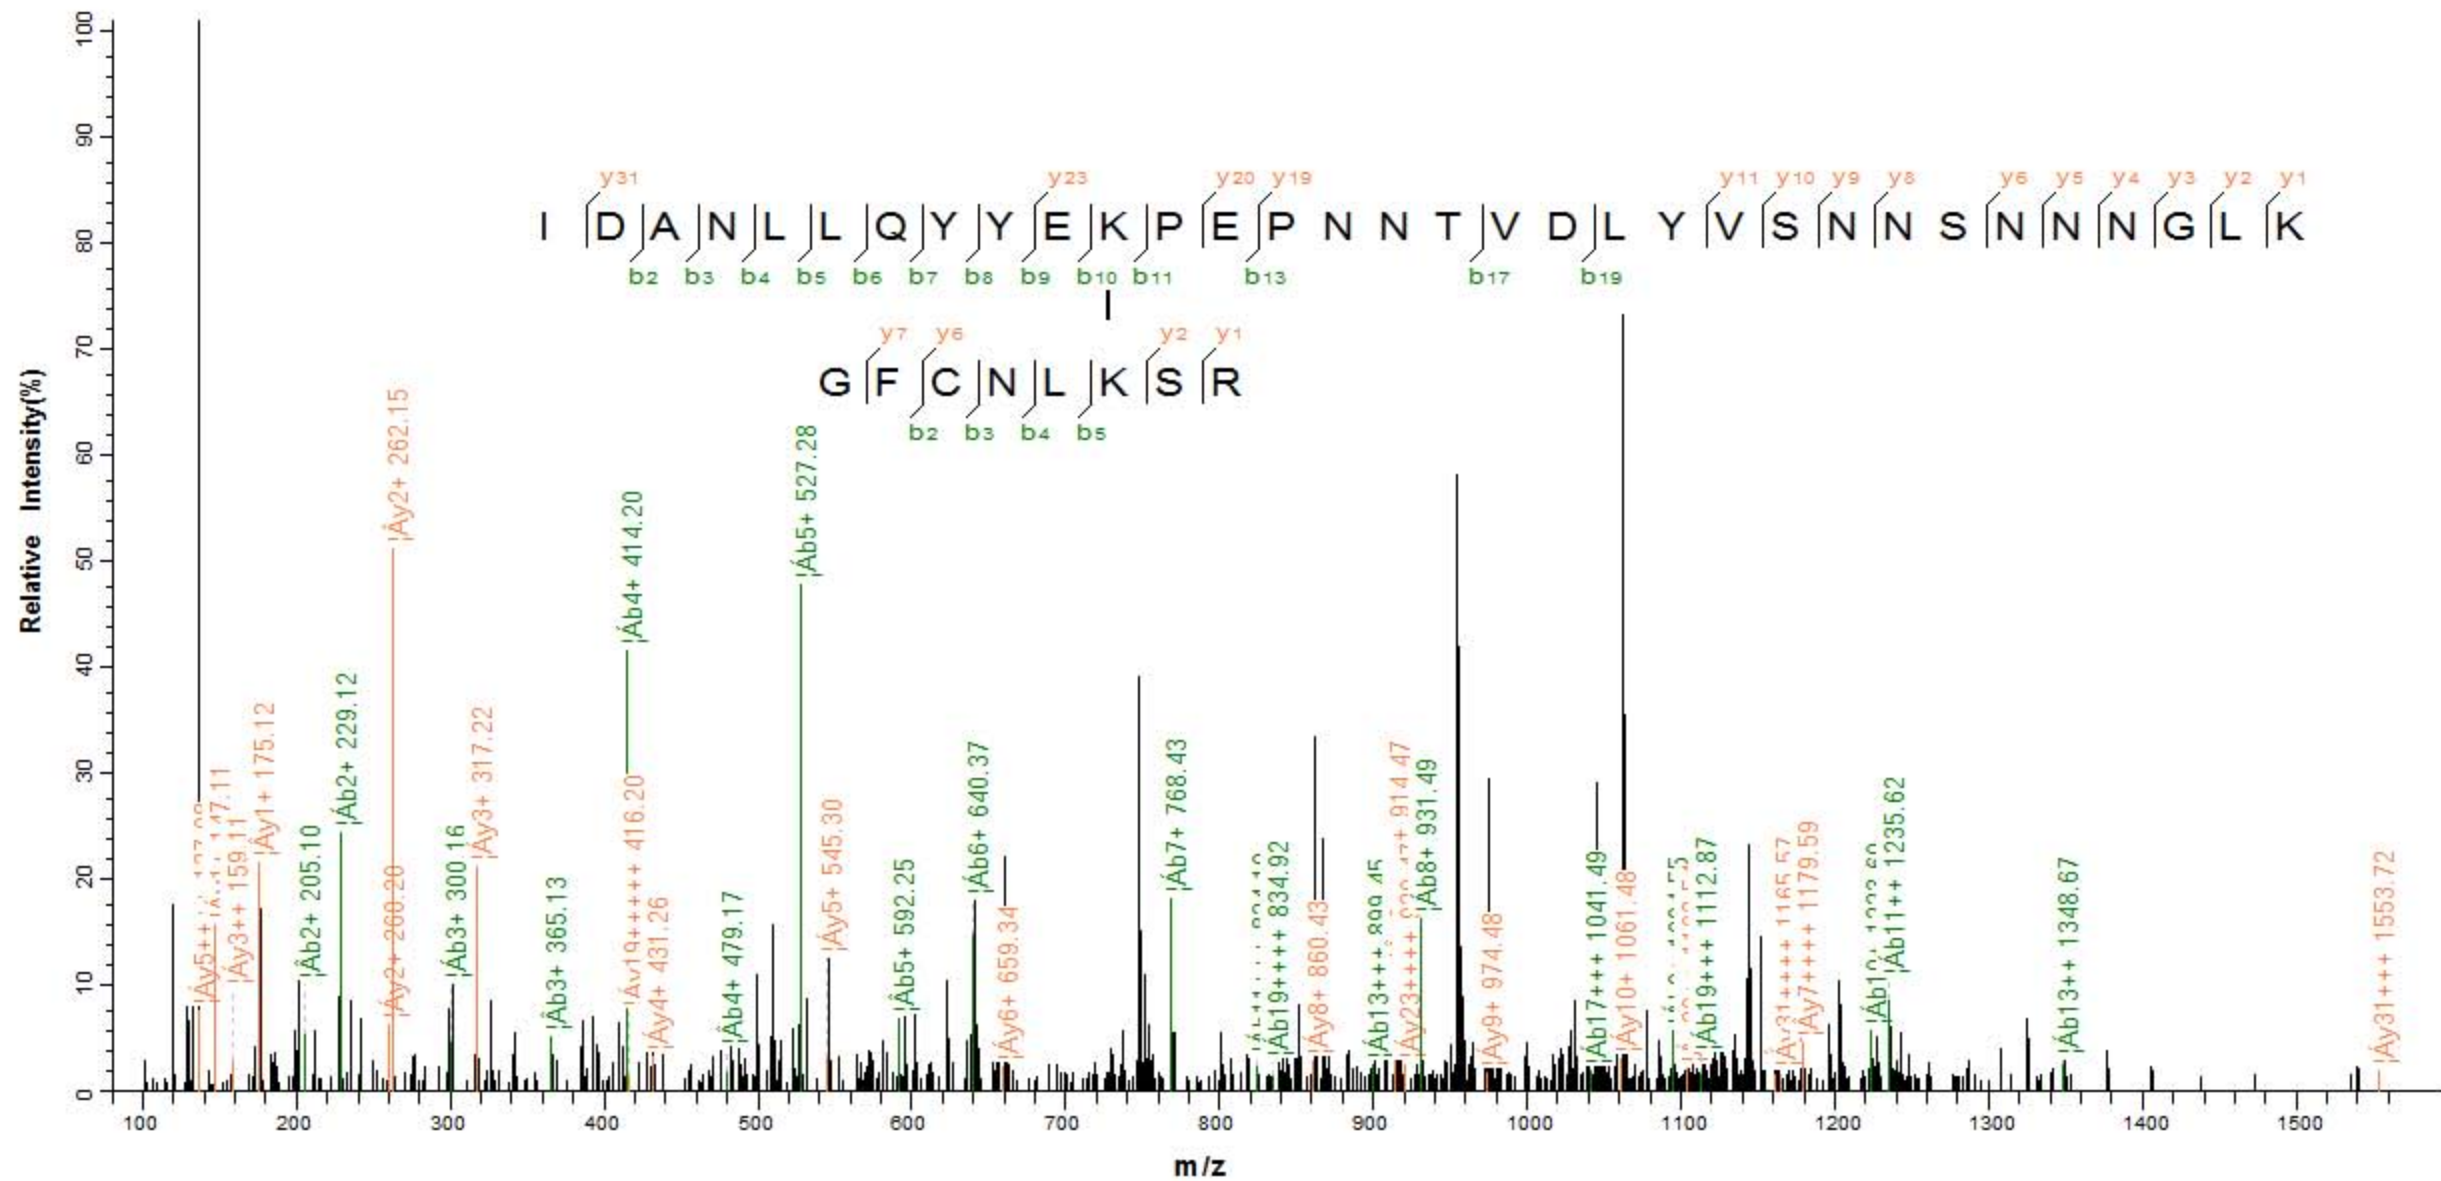

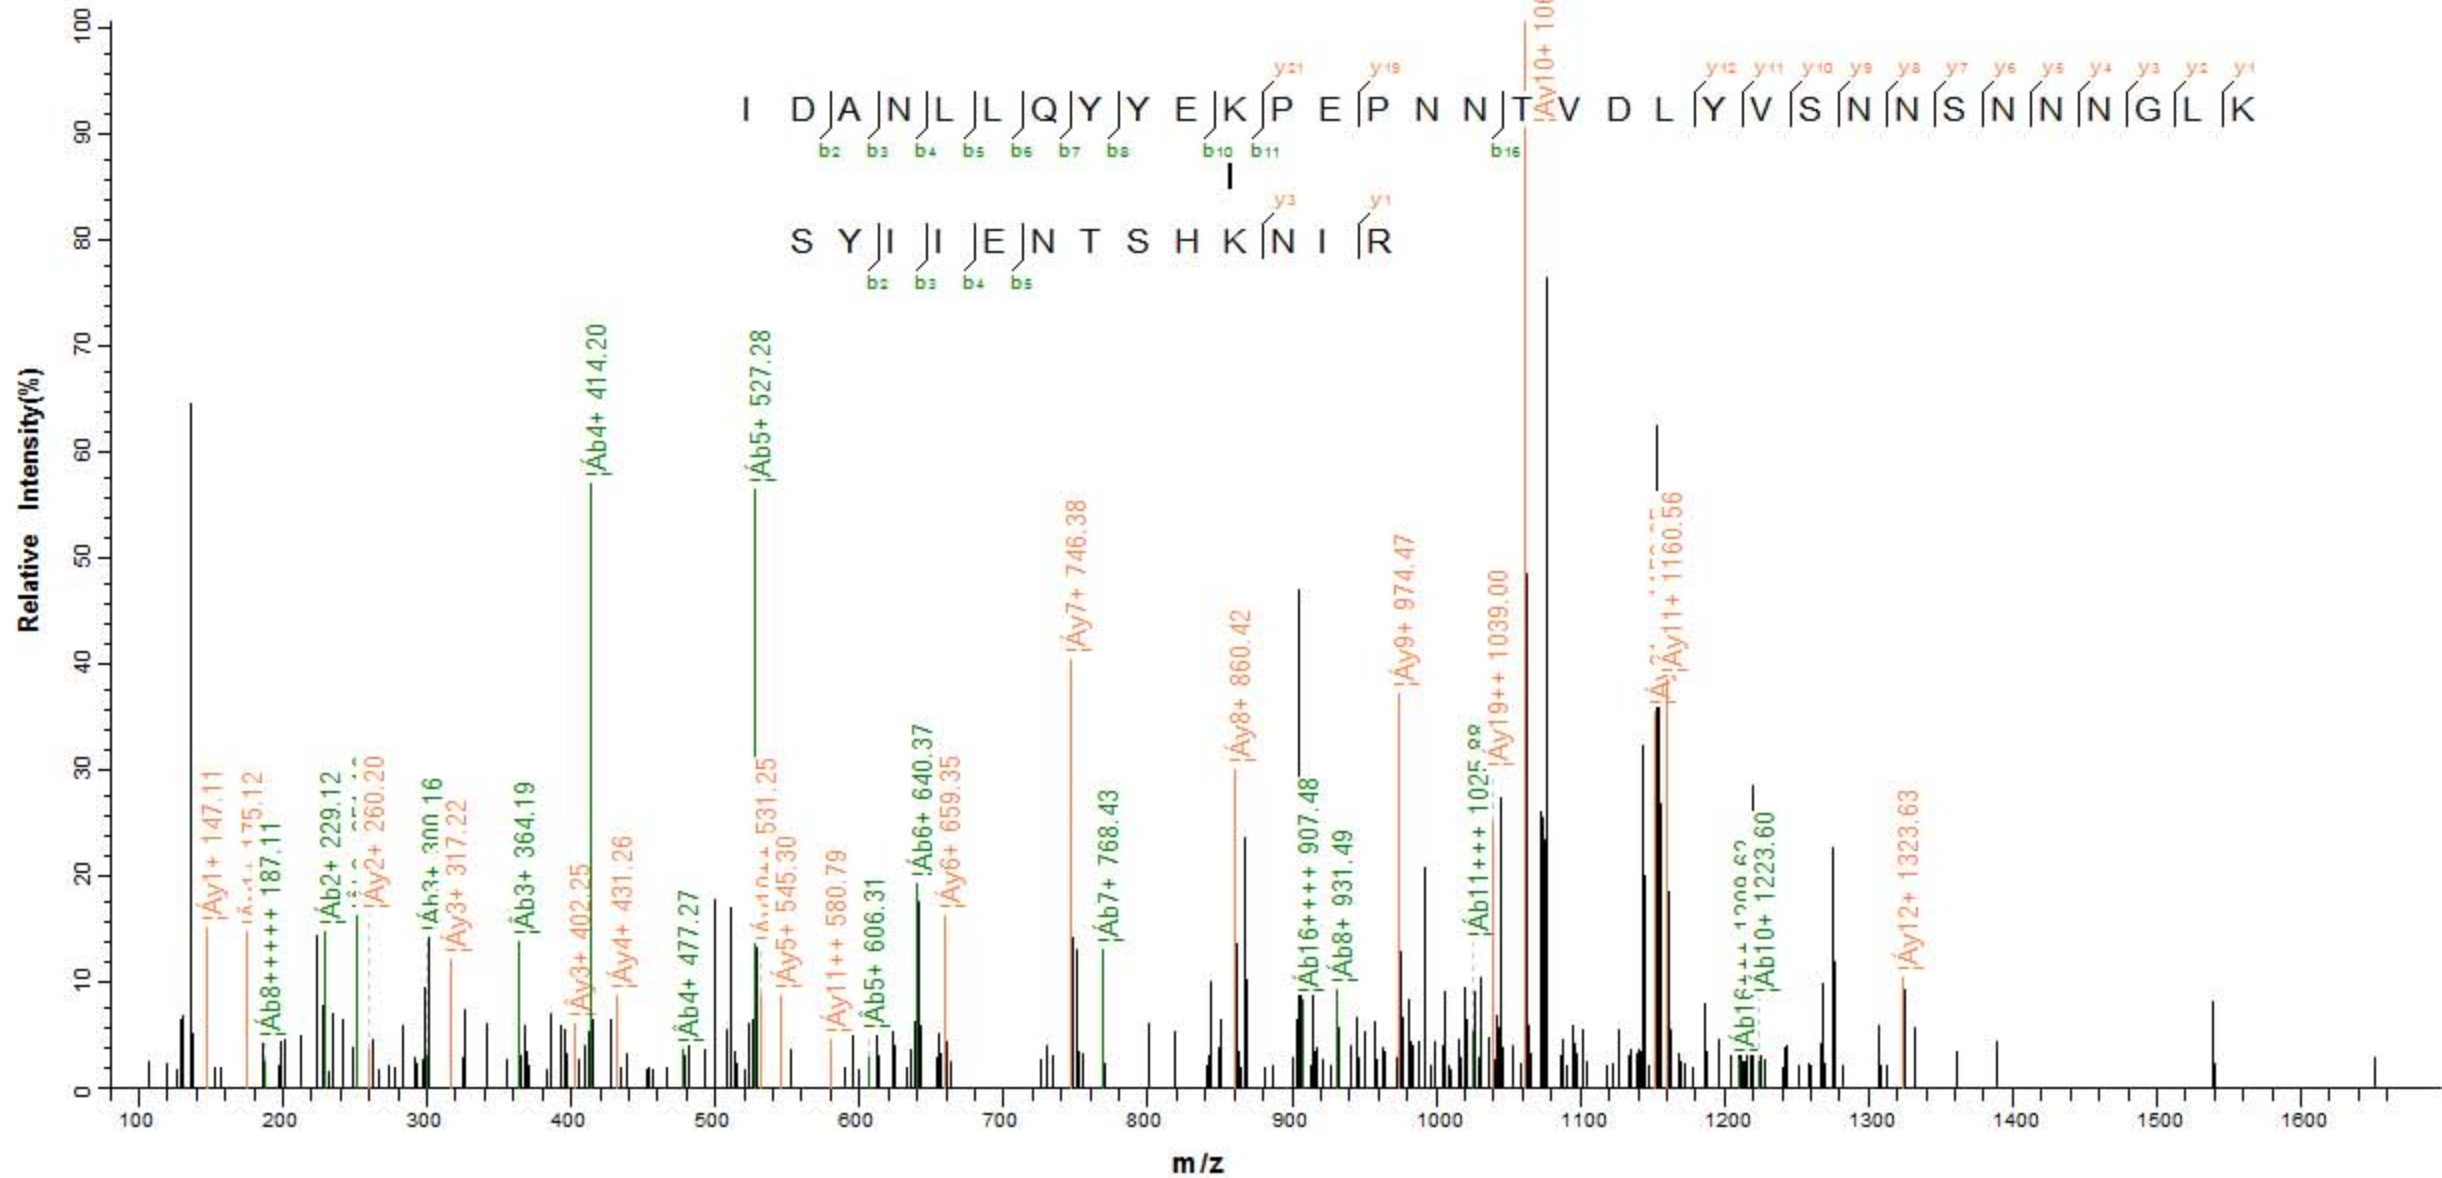

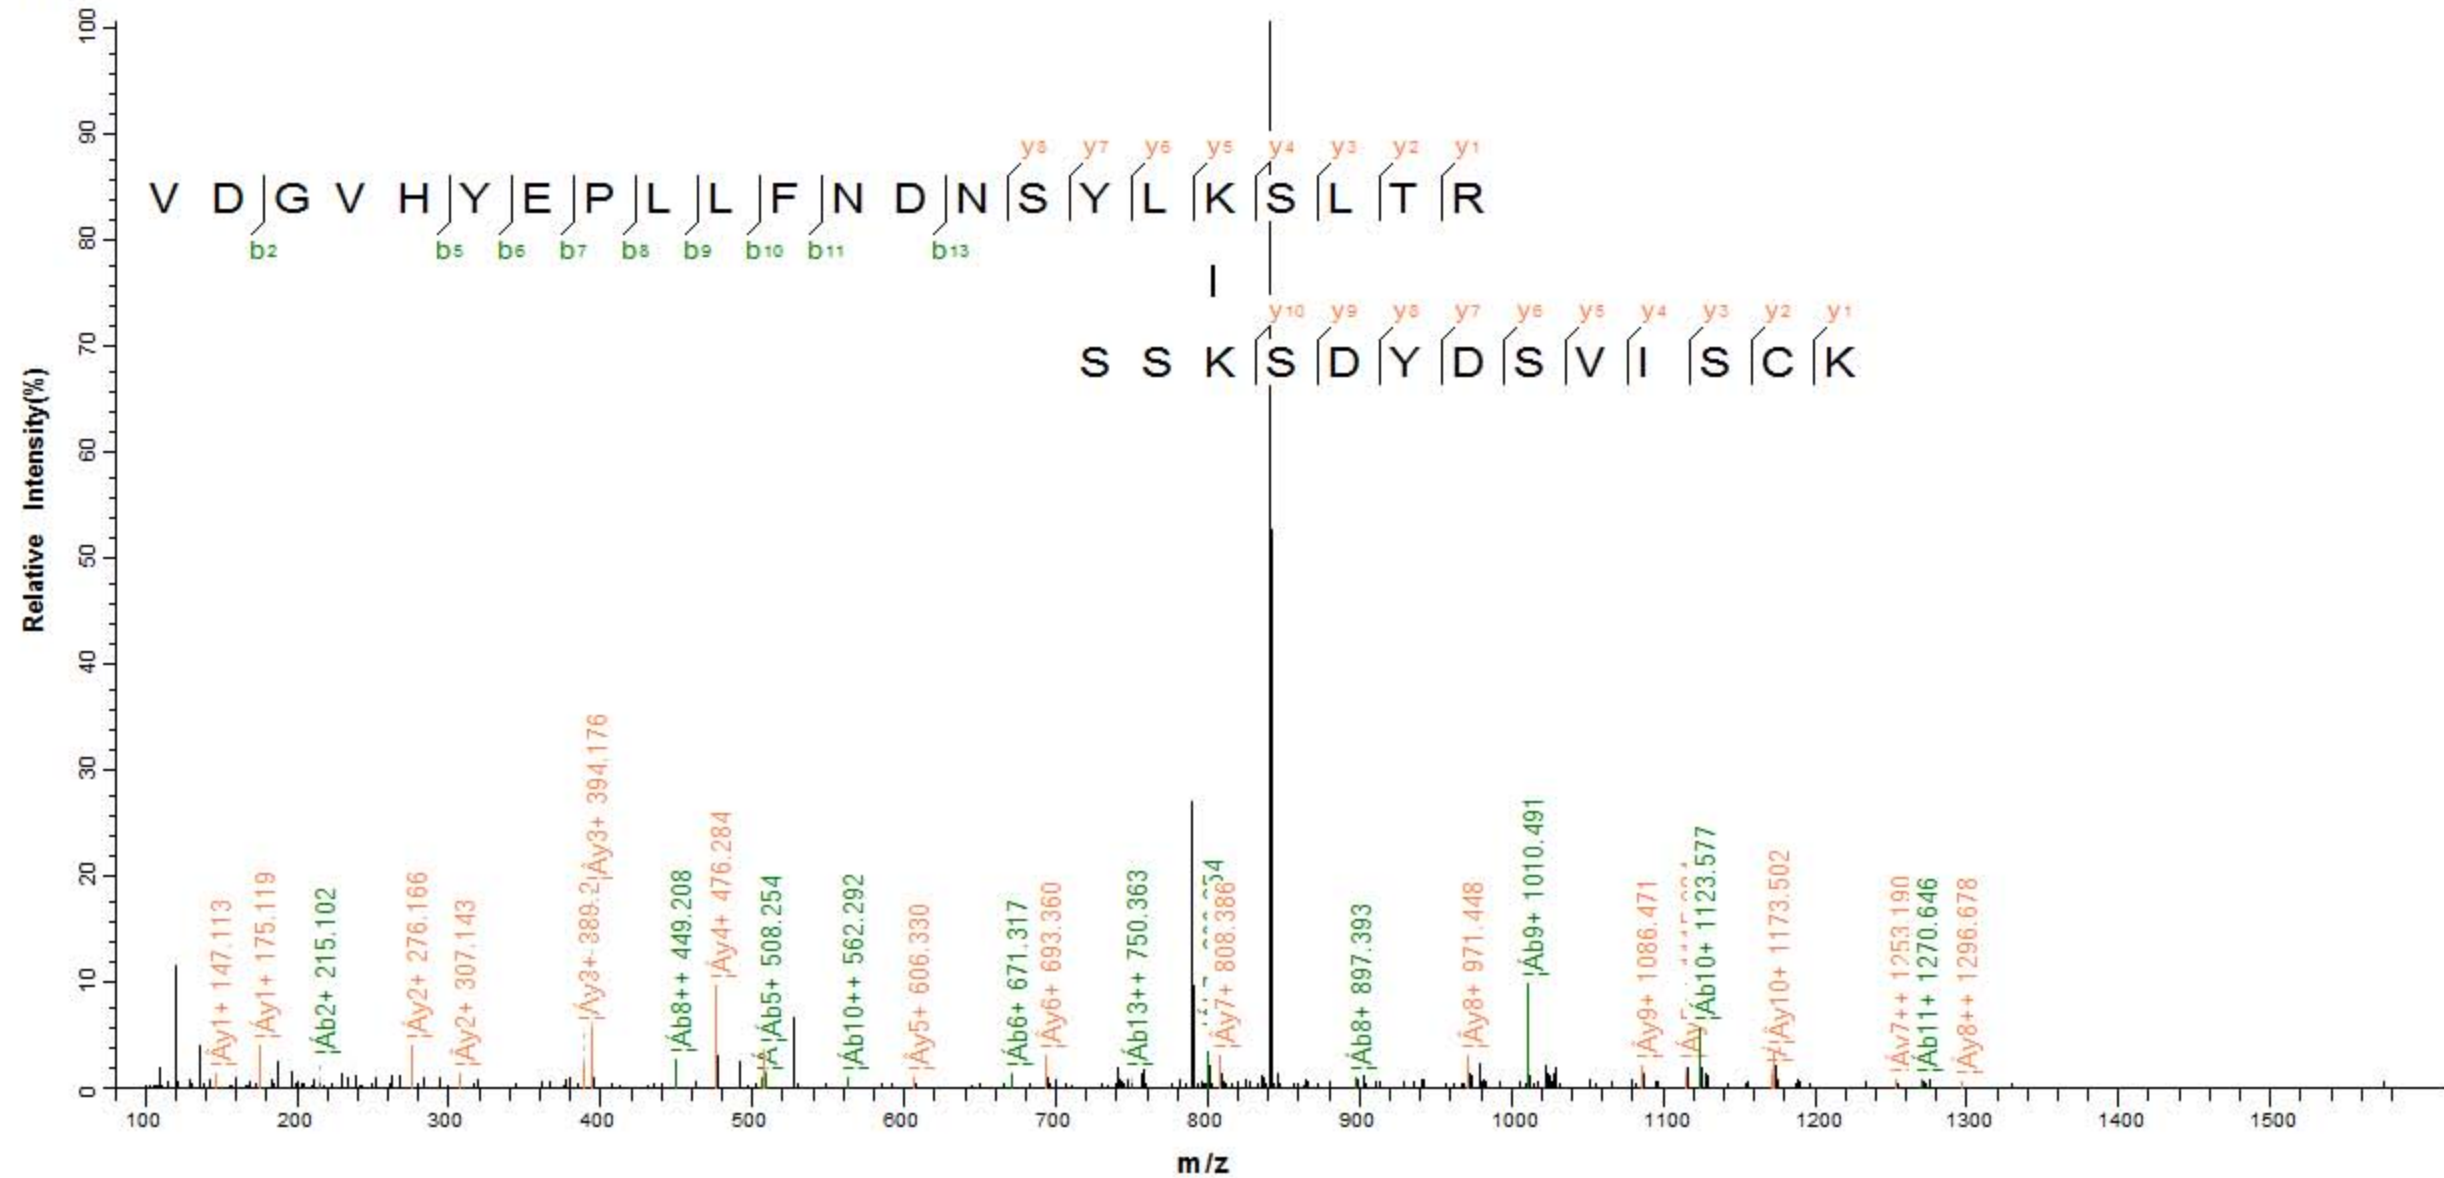

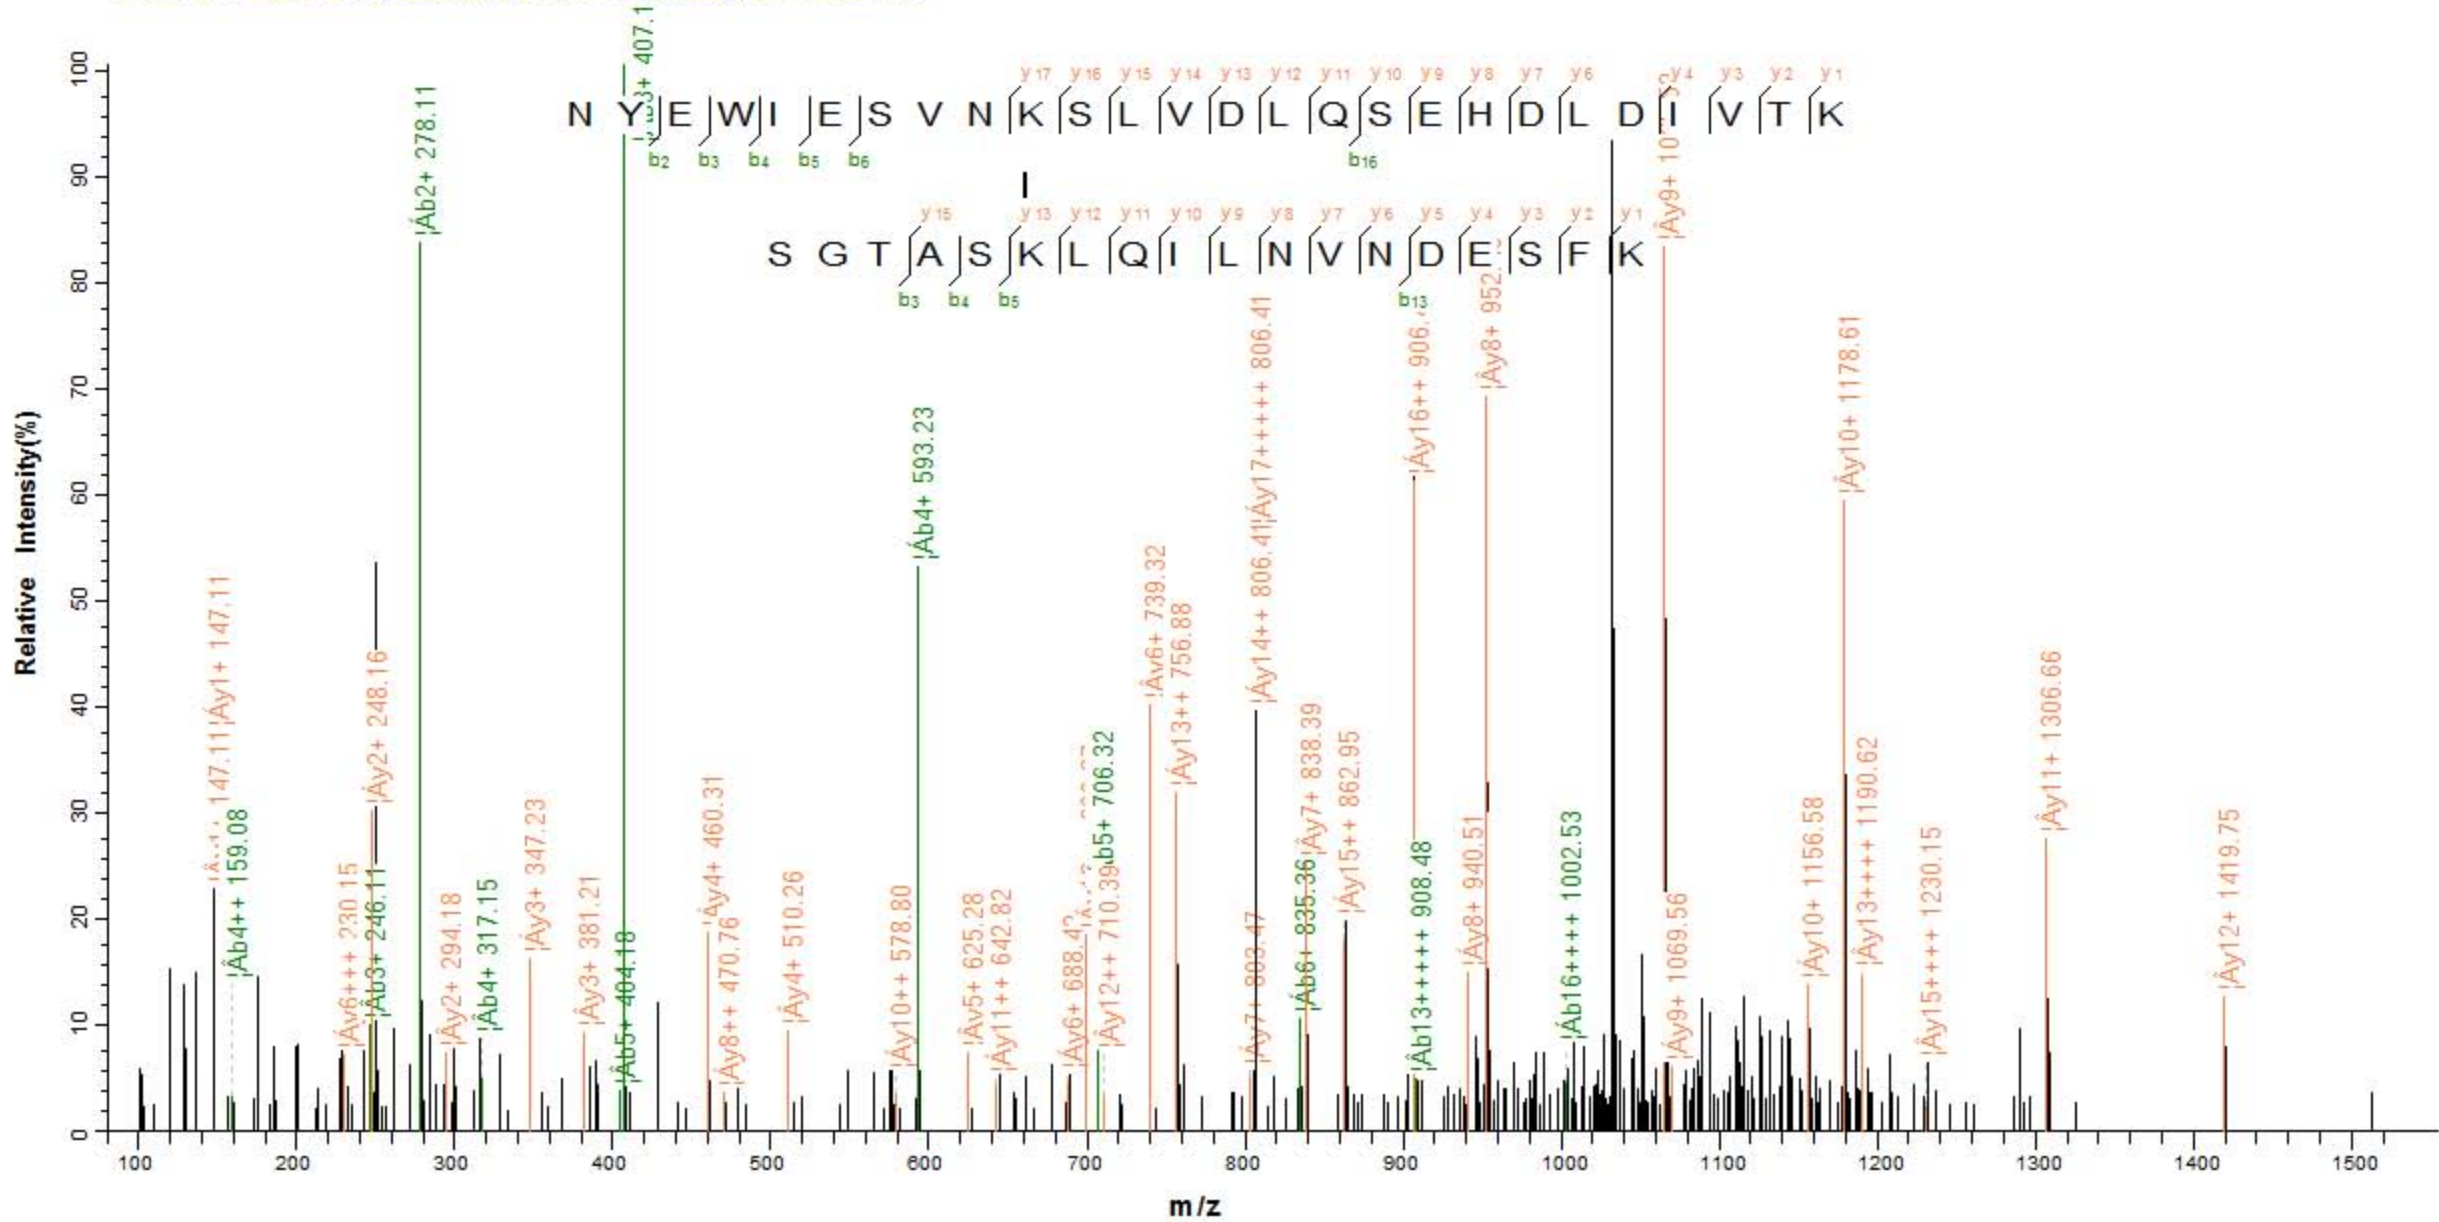

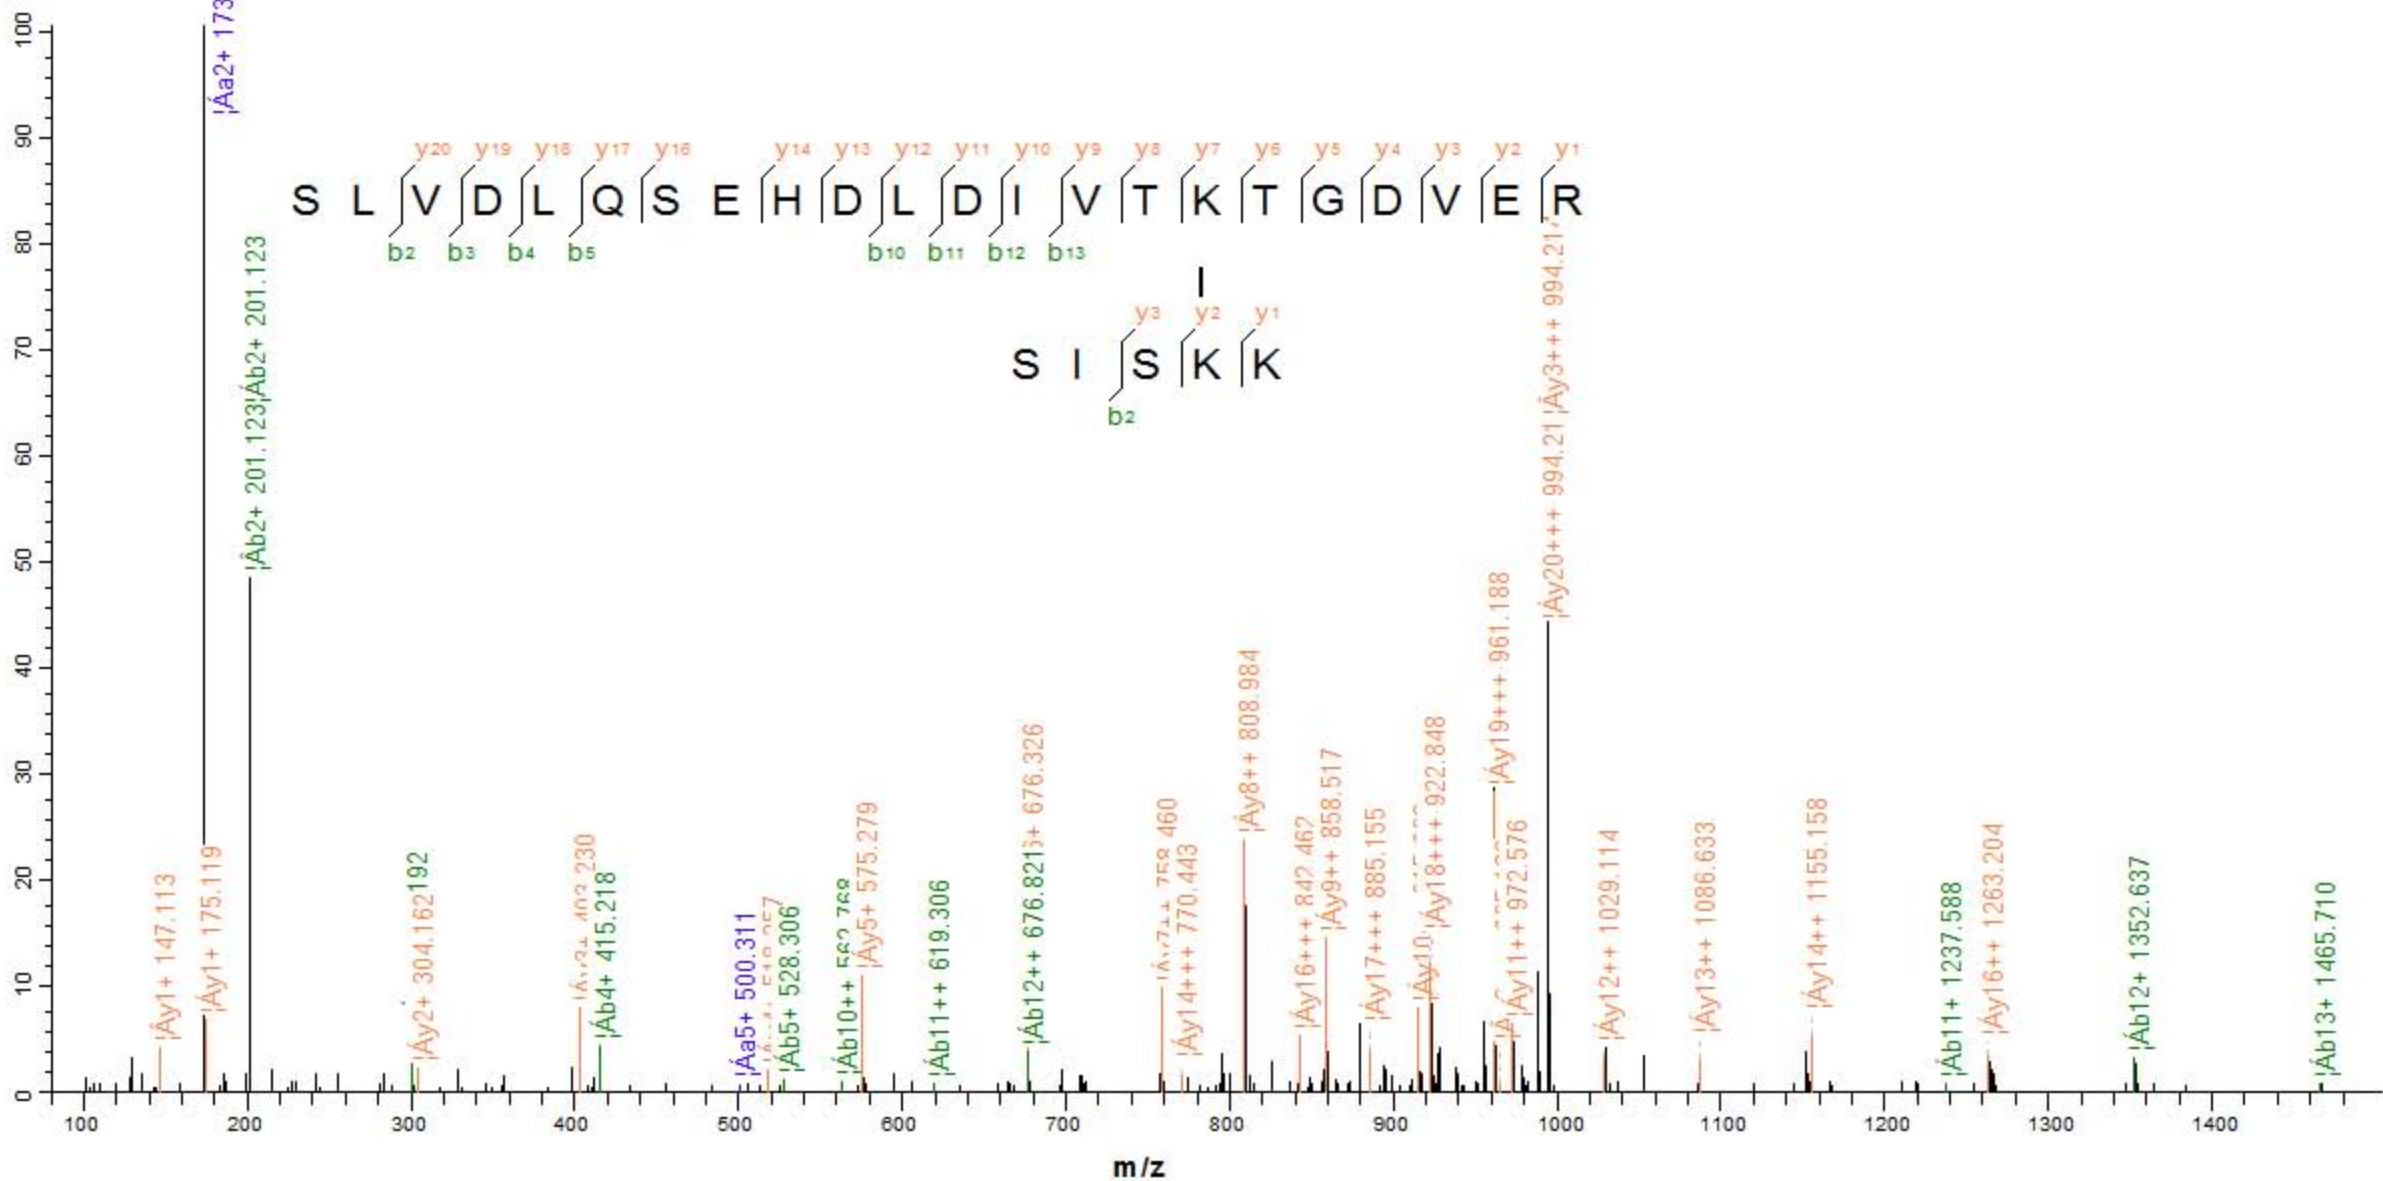

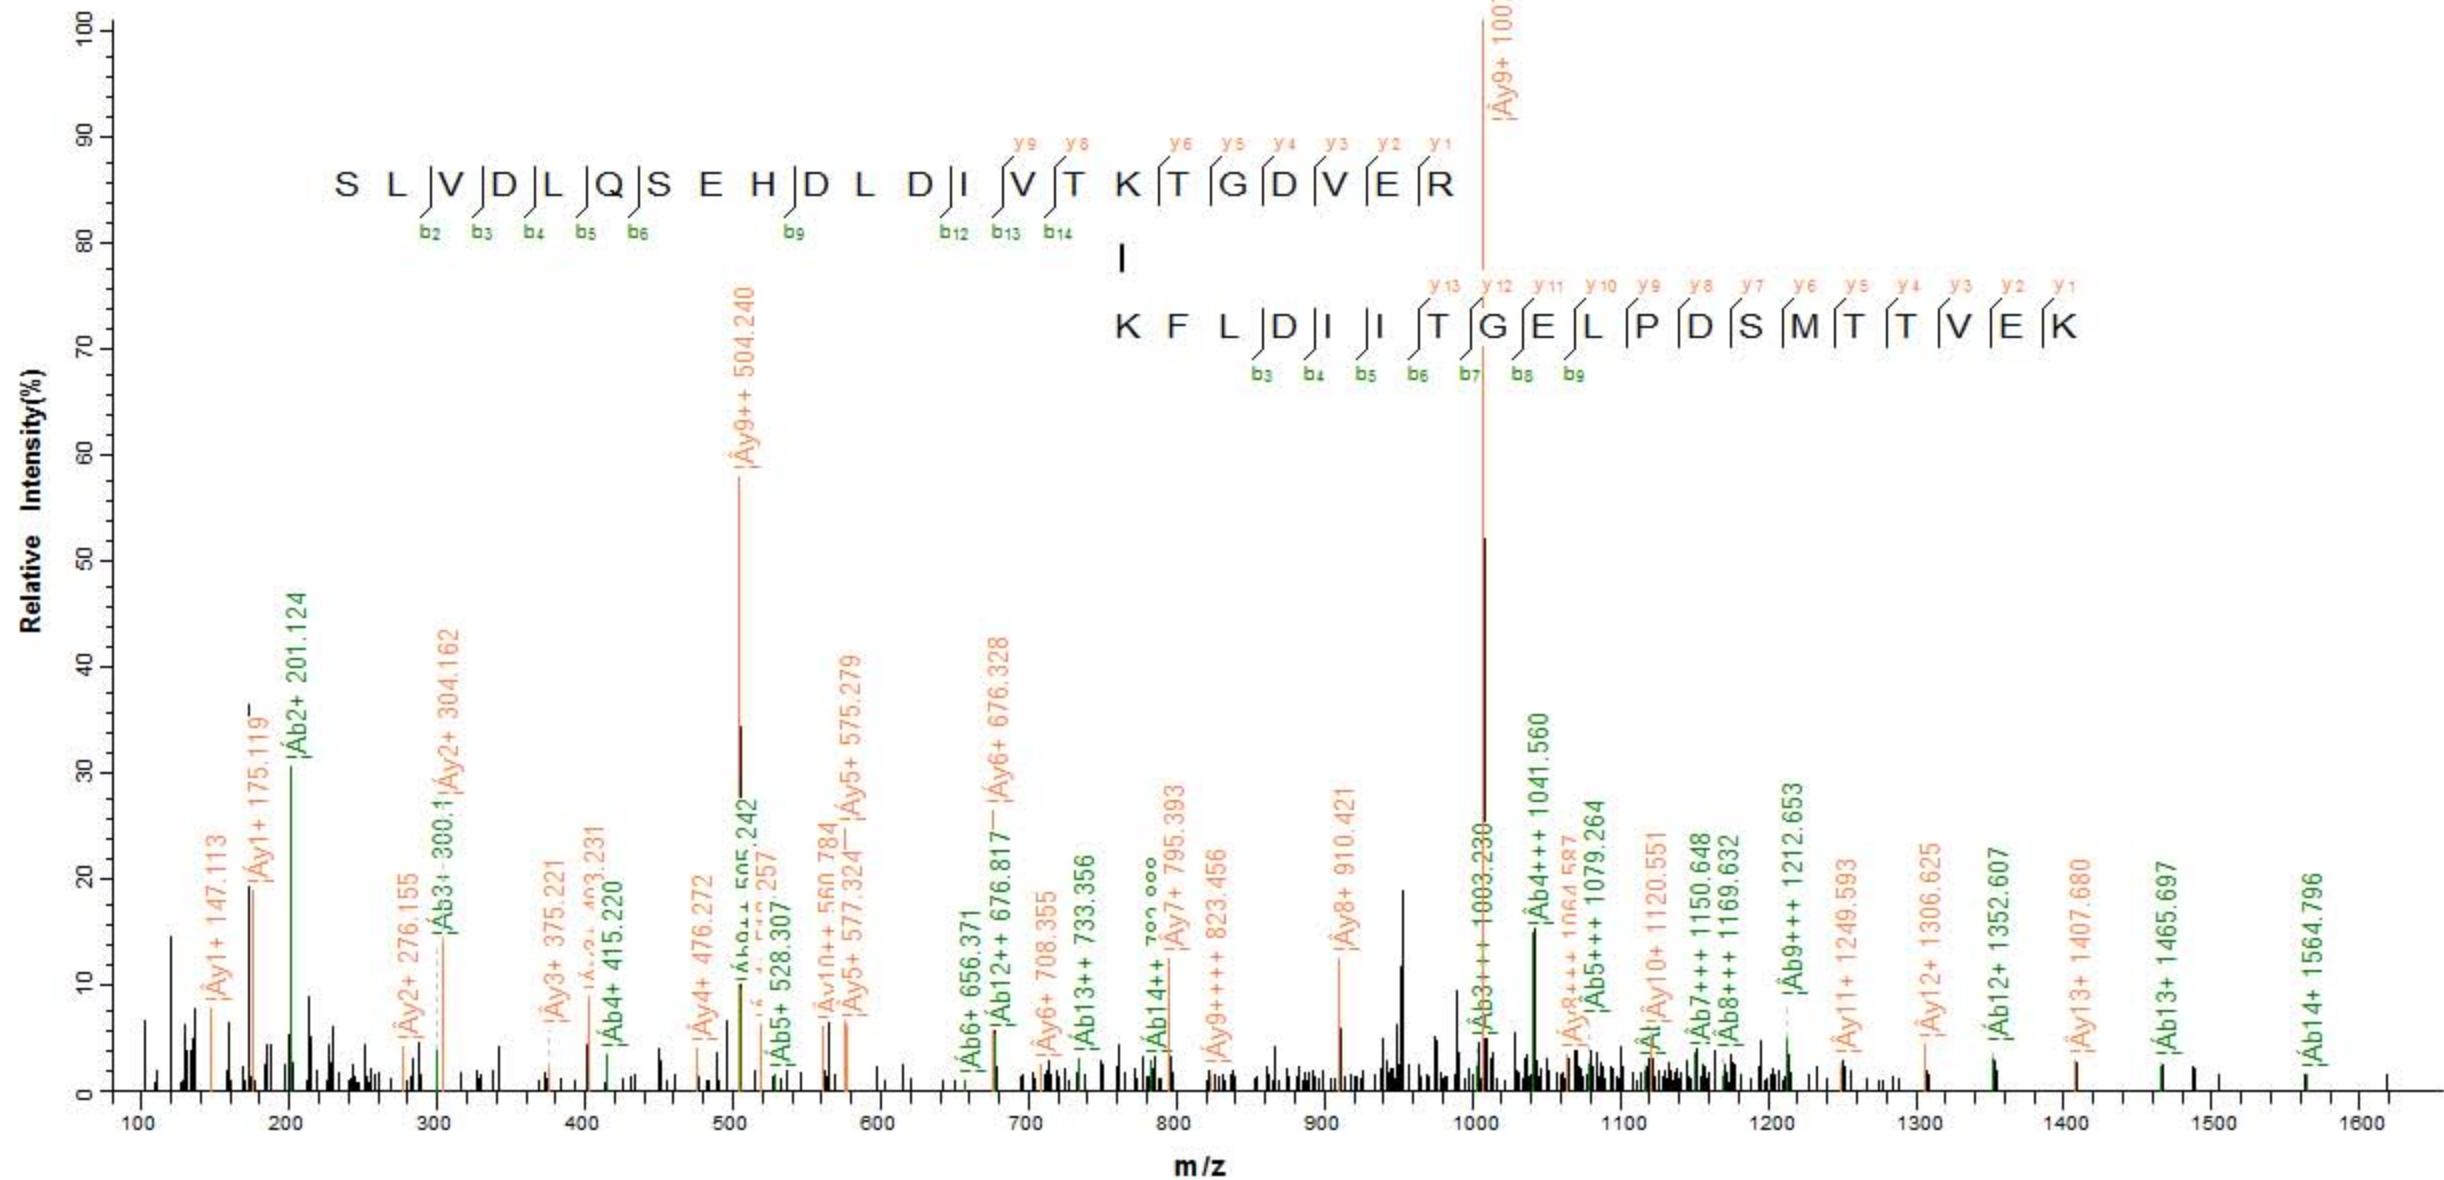

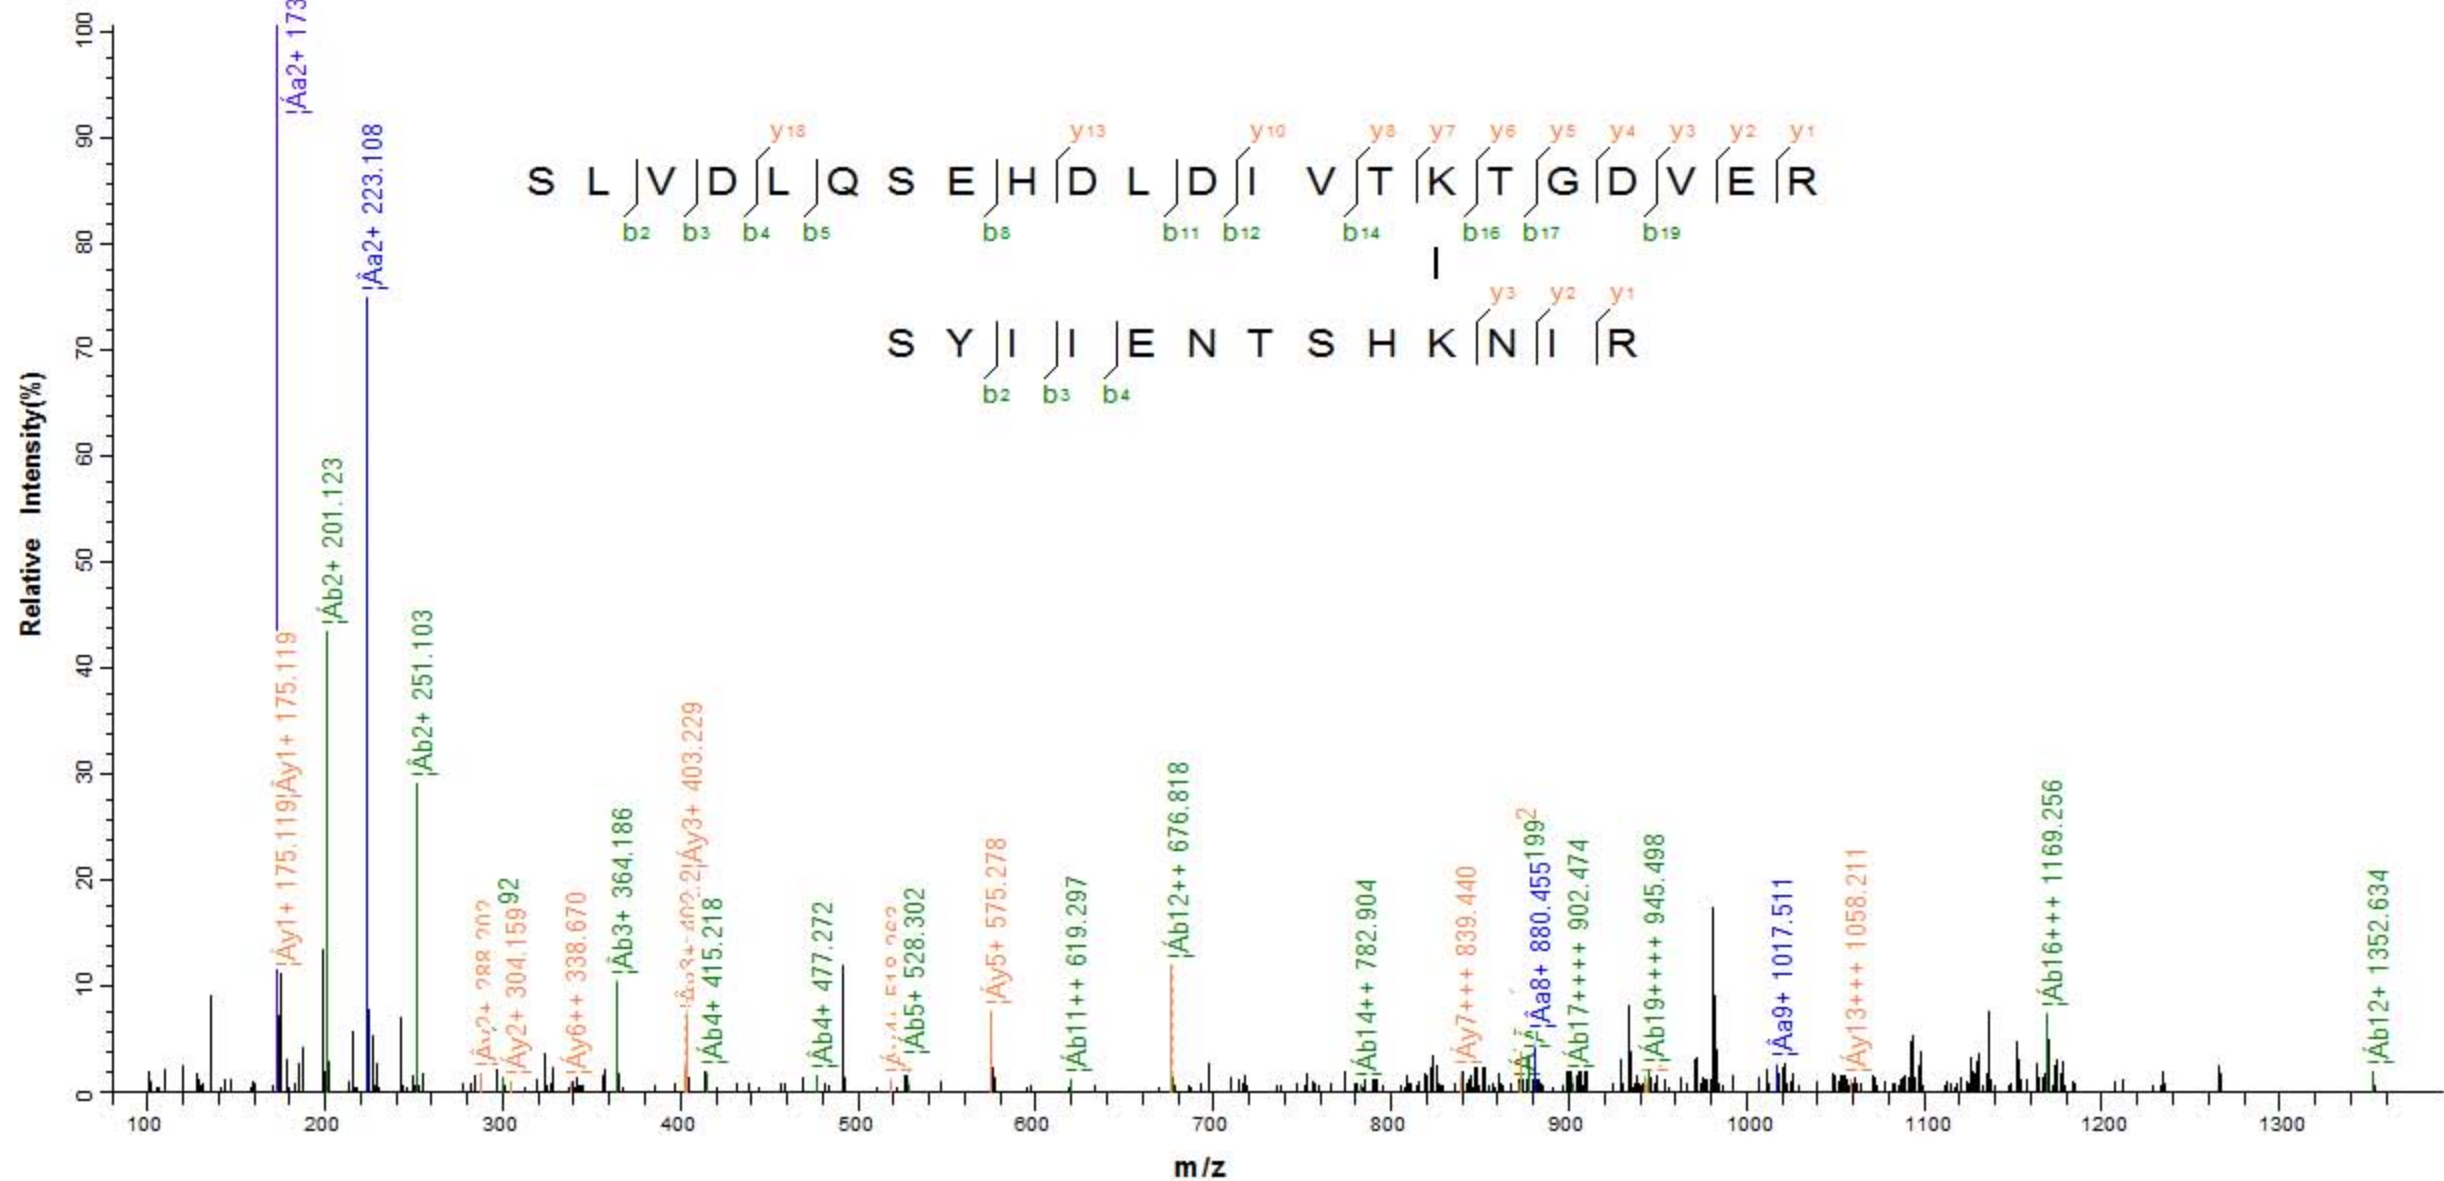

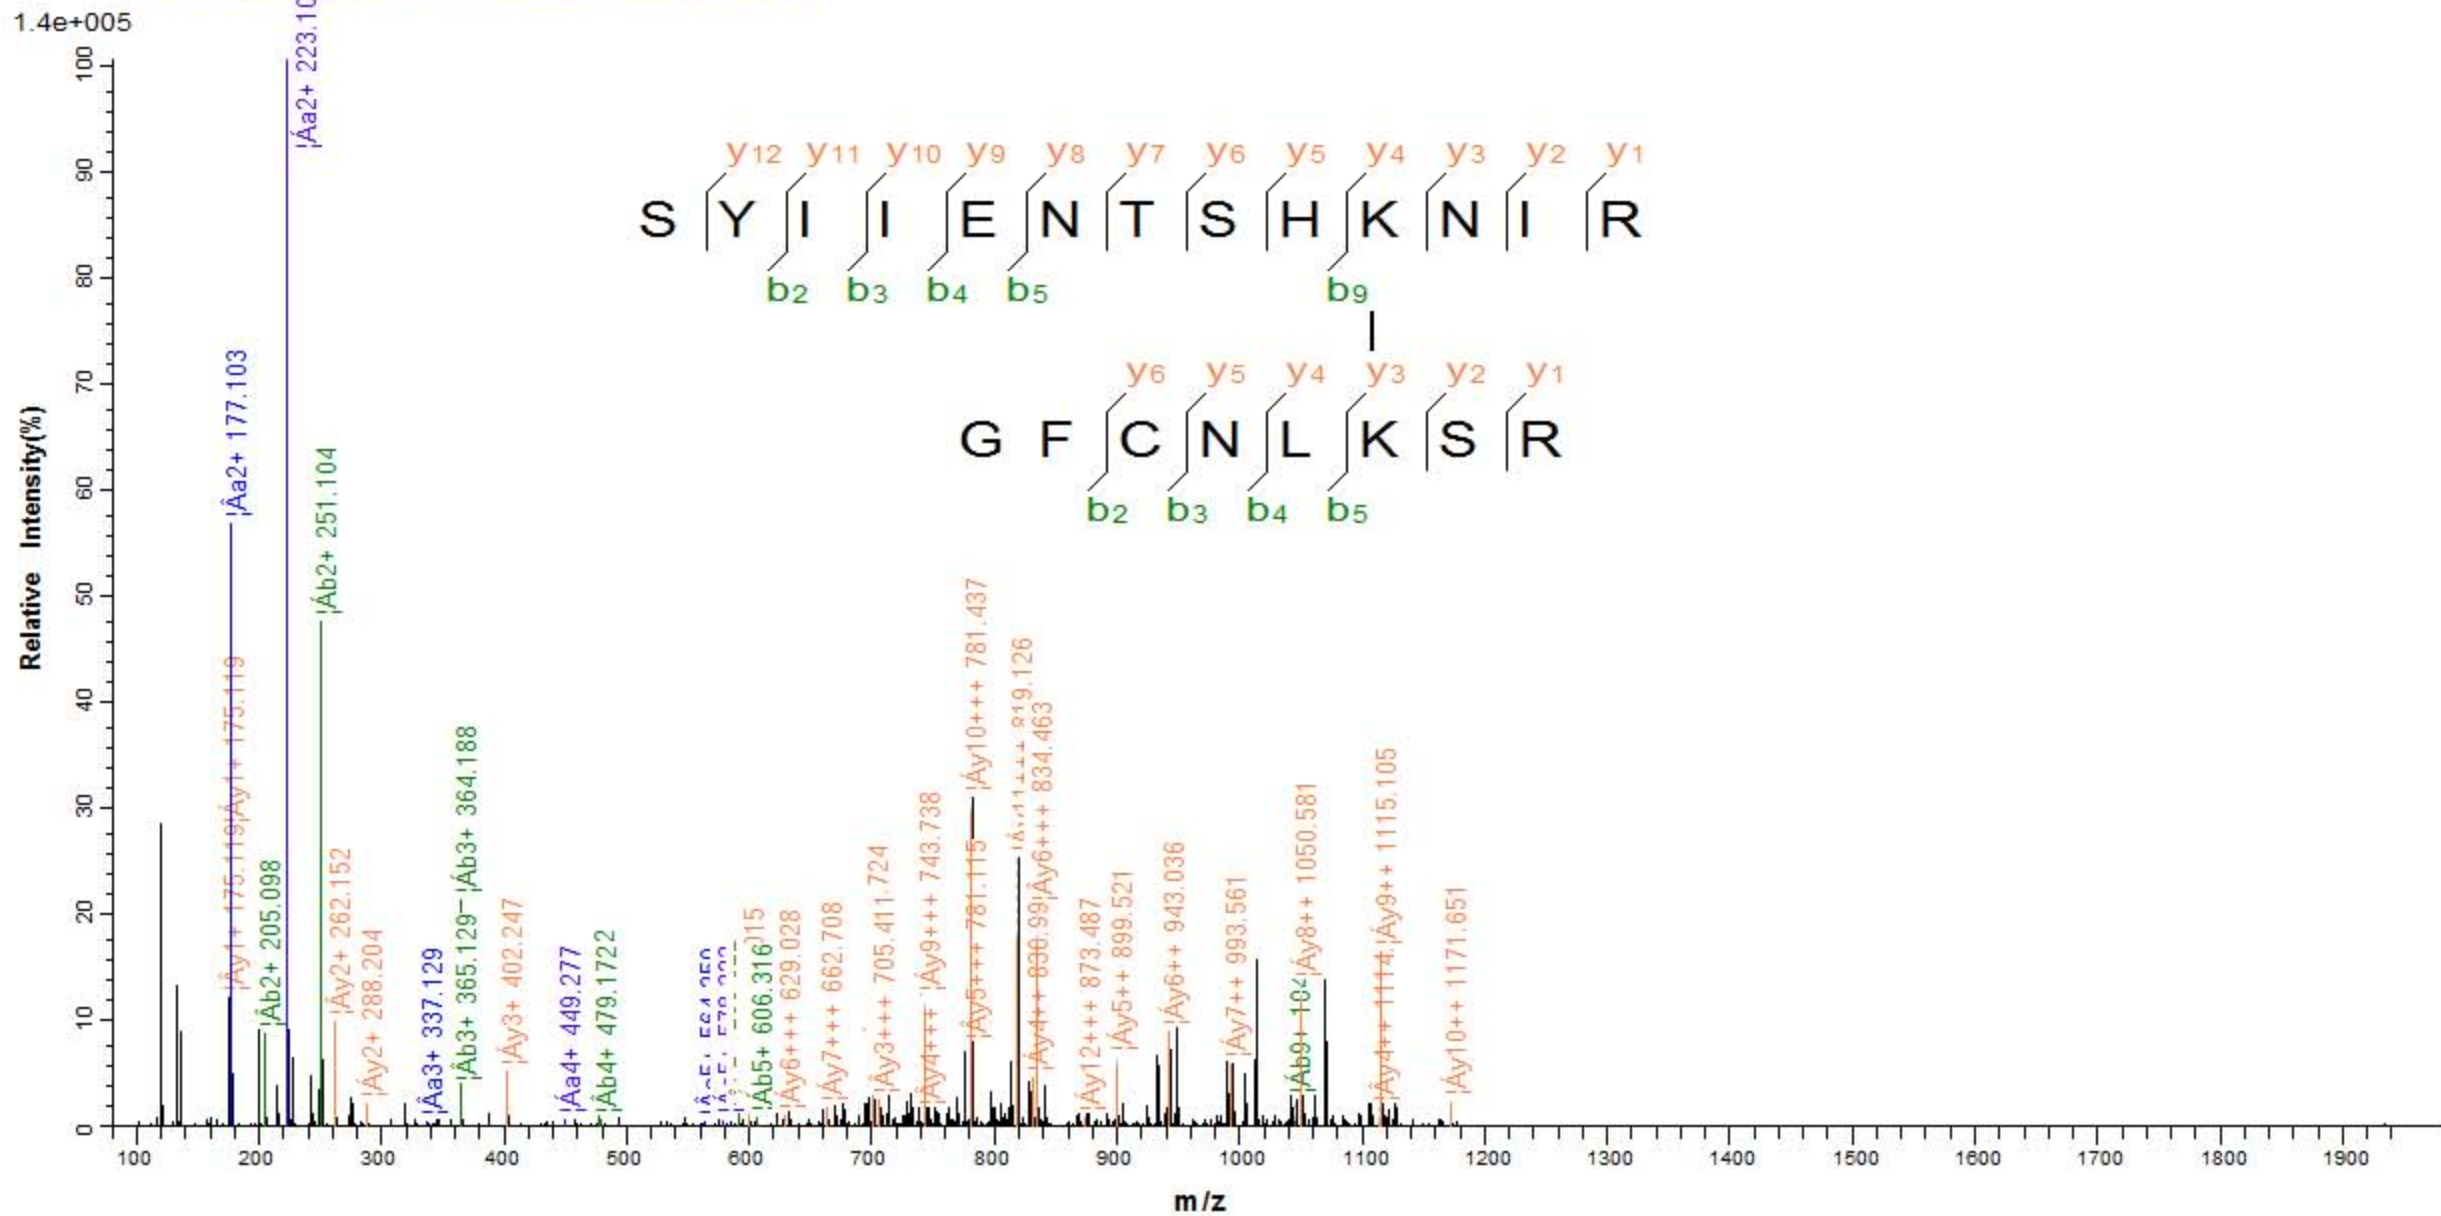



1.5e+004

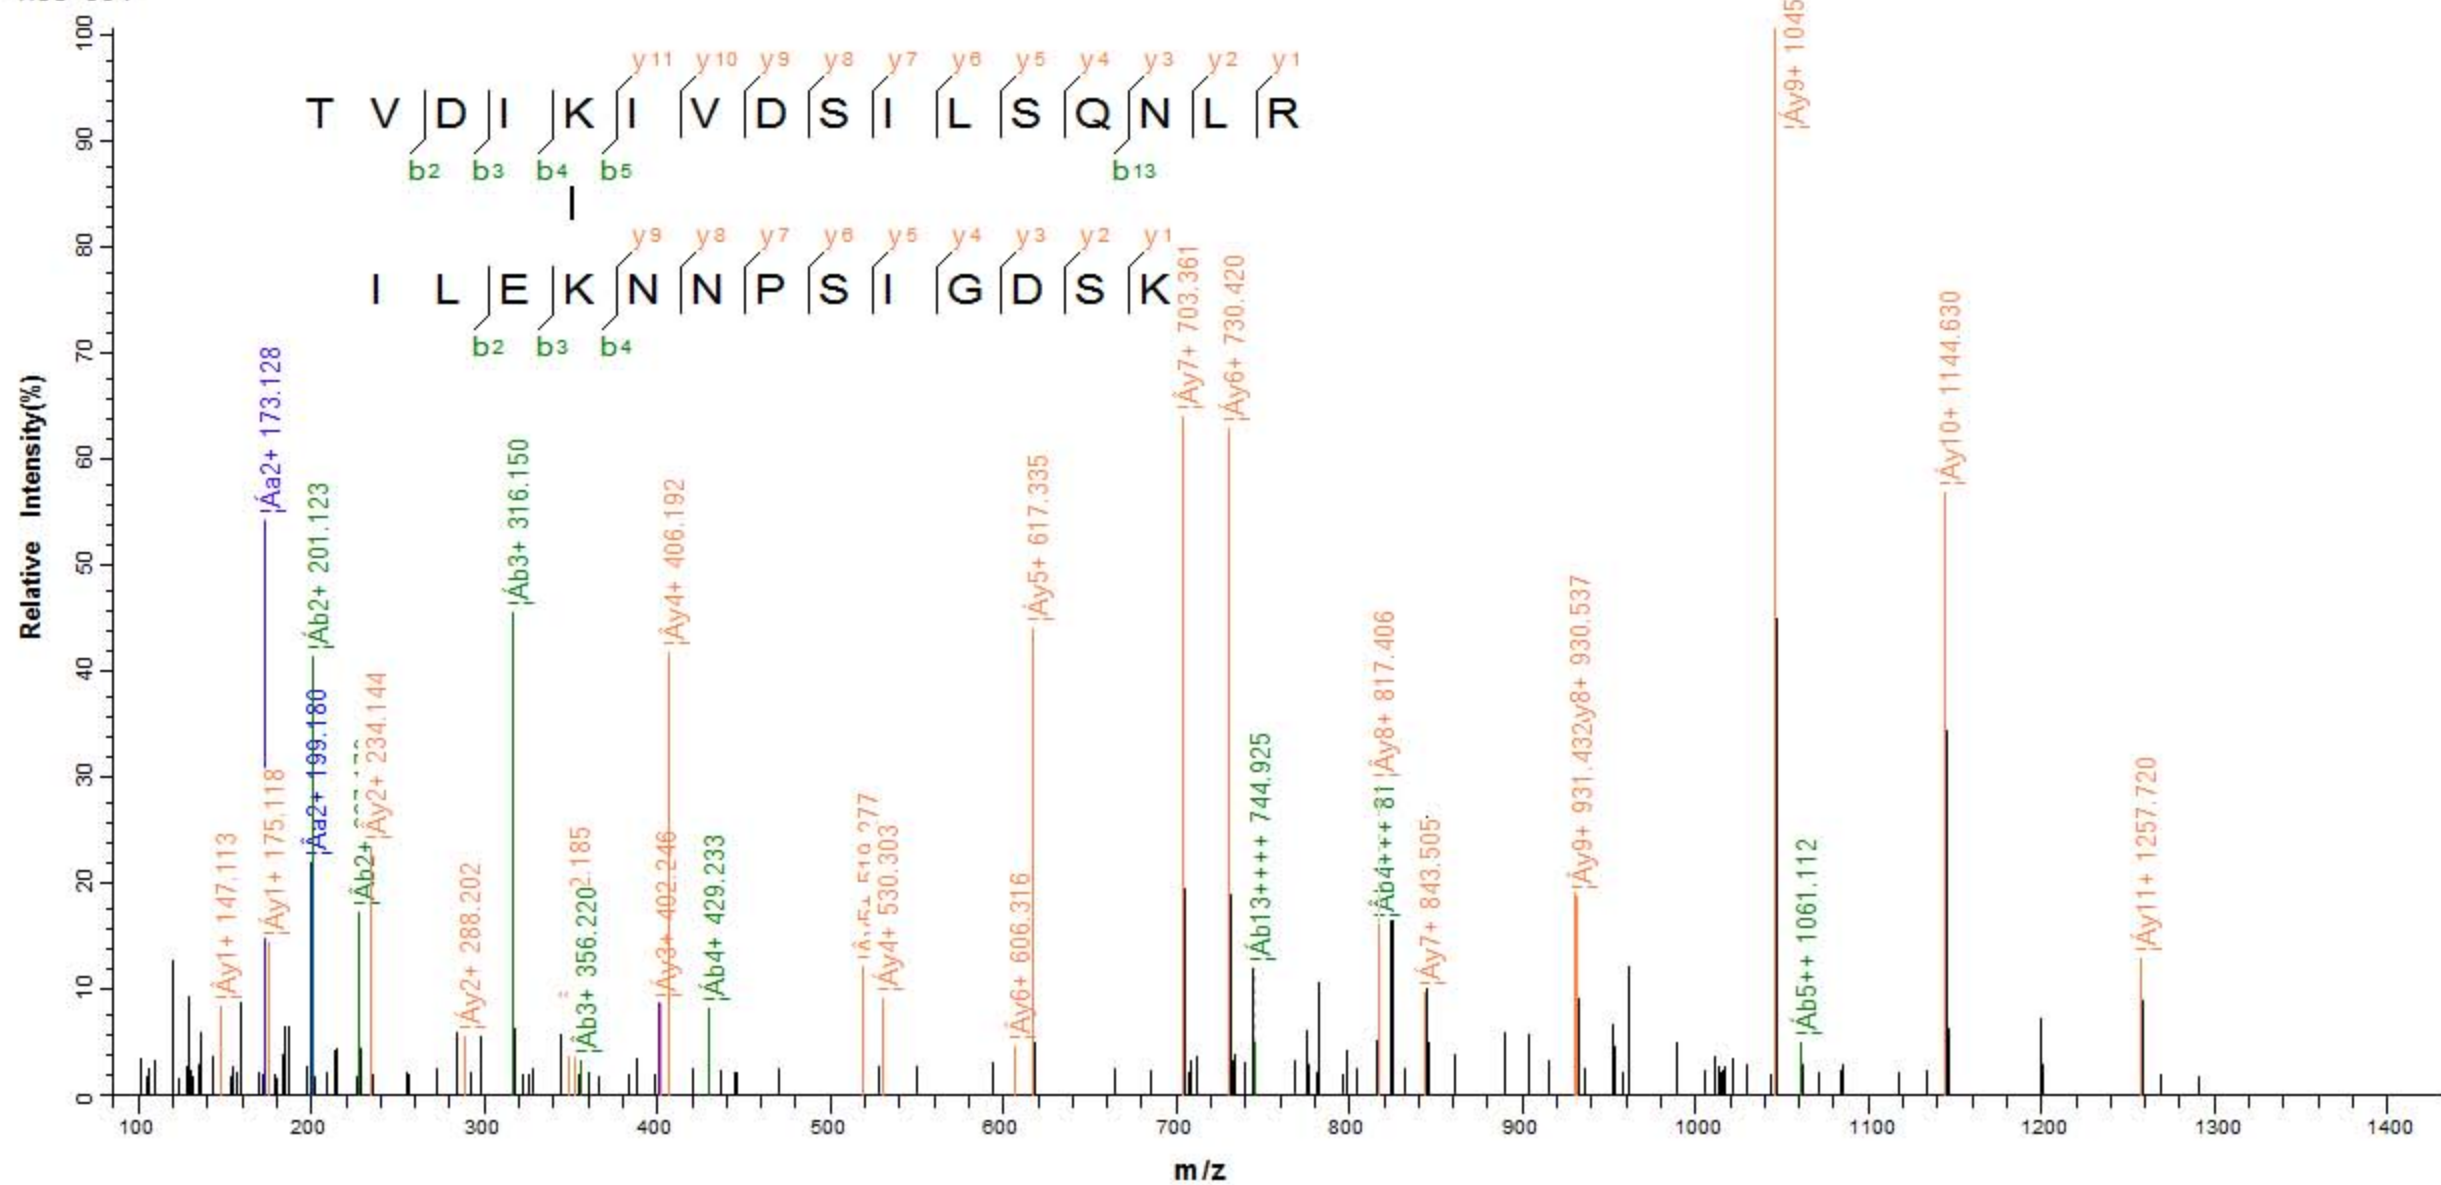

1.2e+005

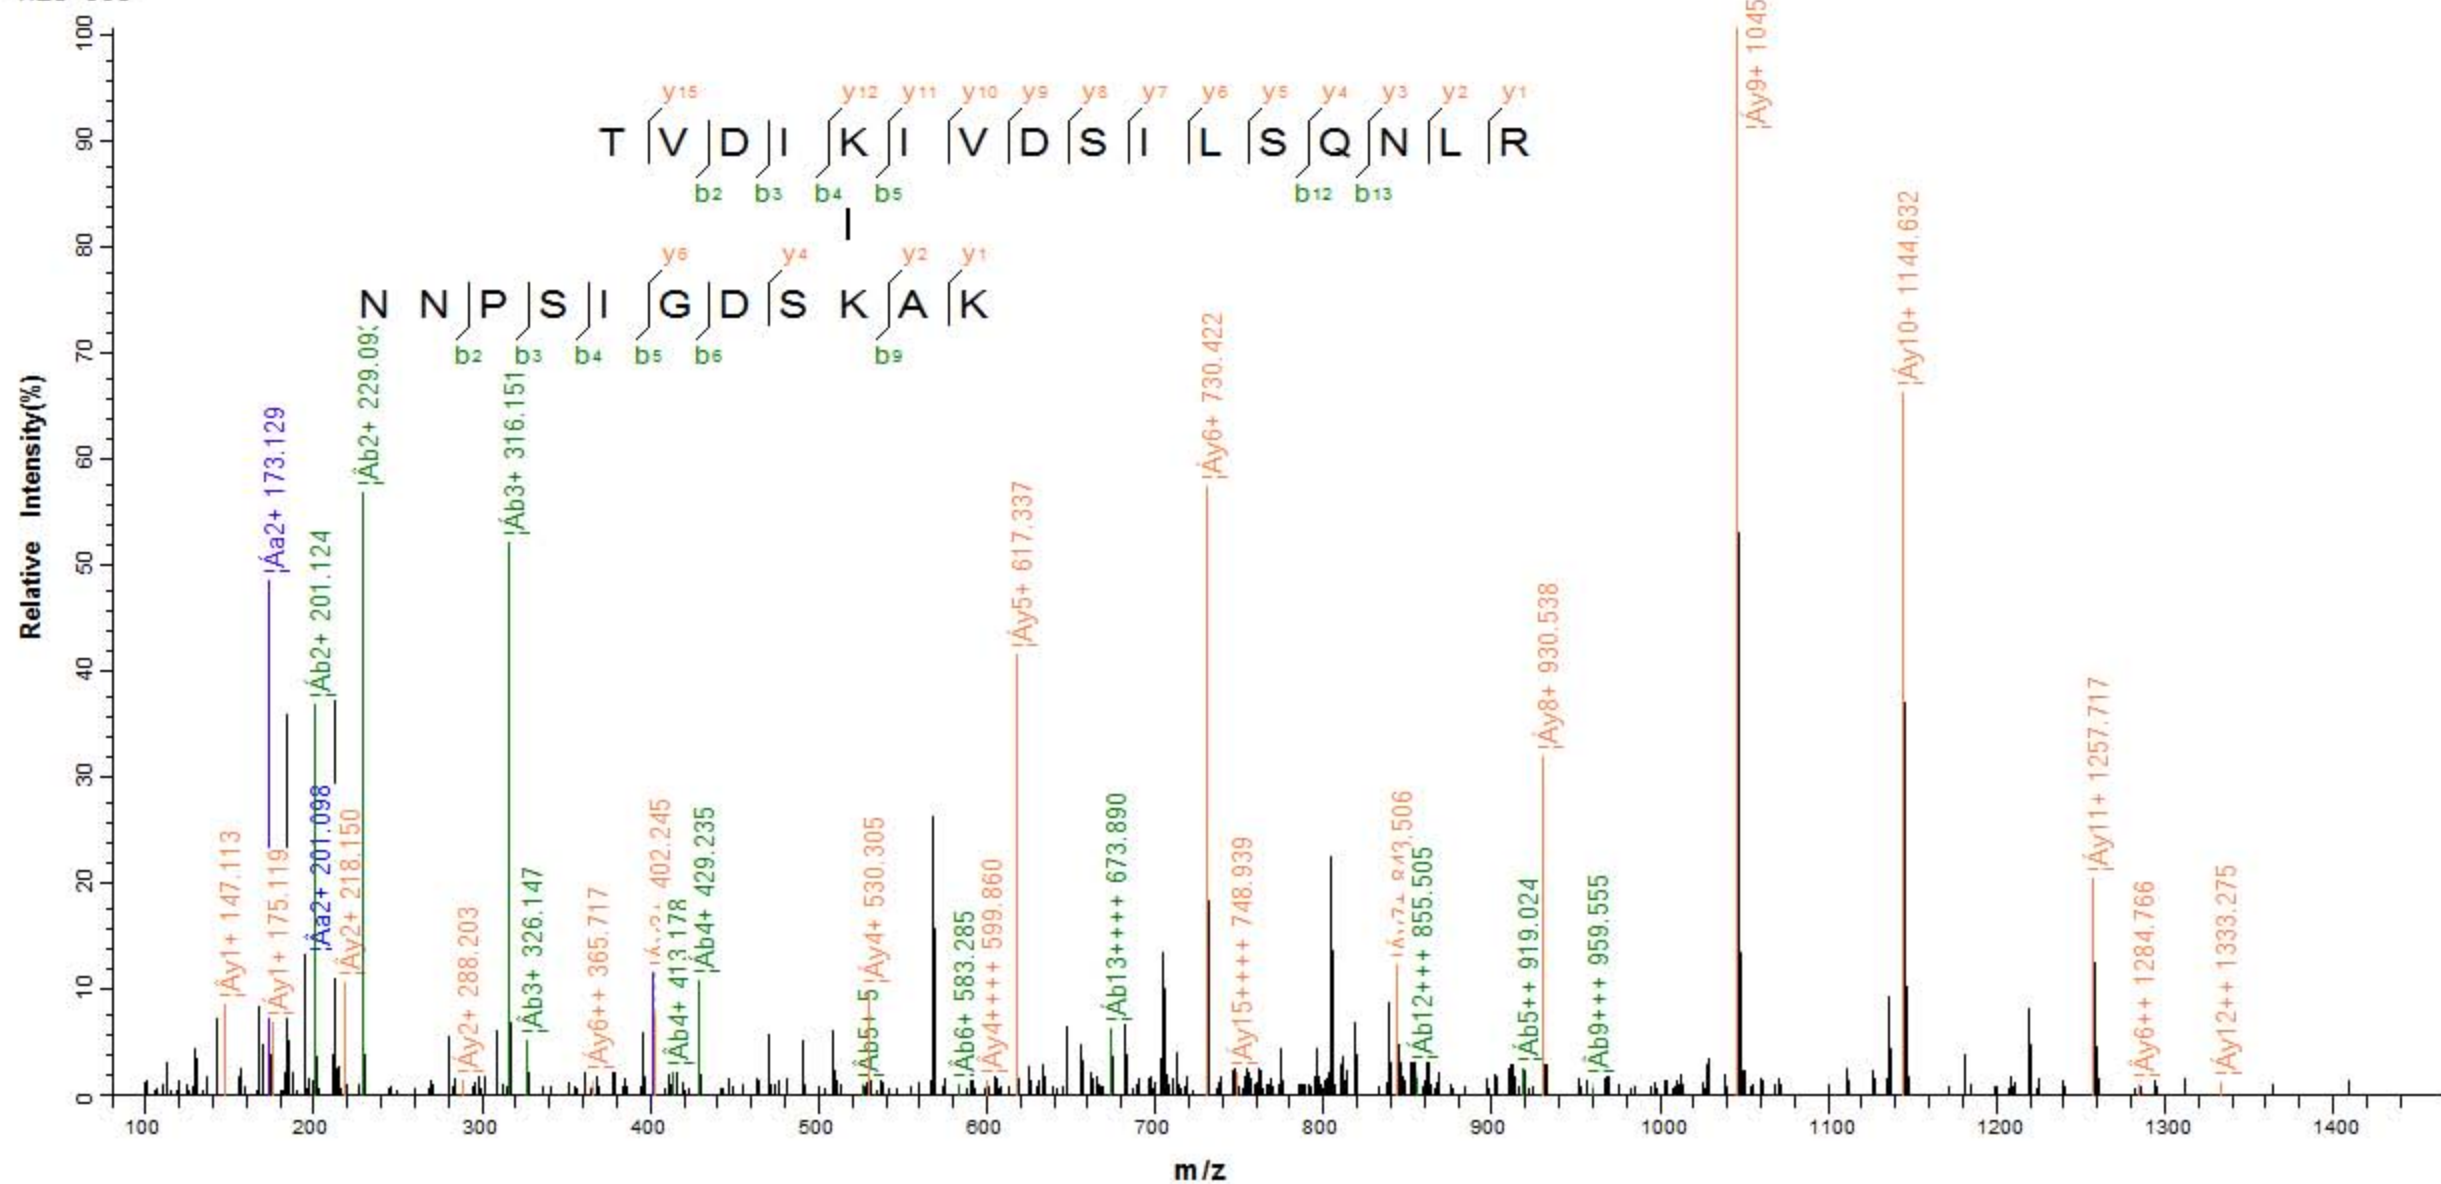

1.4e+004

Relative Intensity(%)

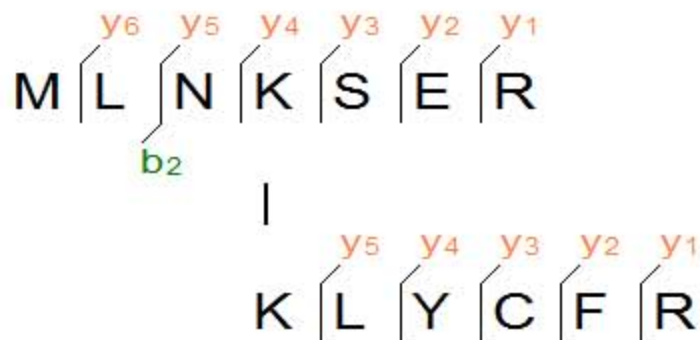 $|A_4+$  645.282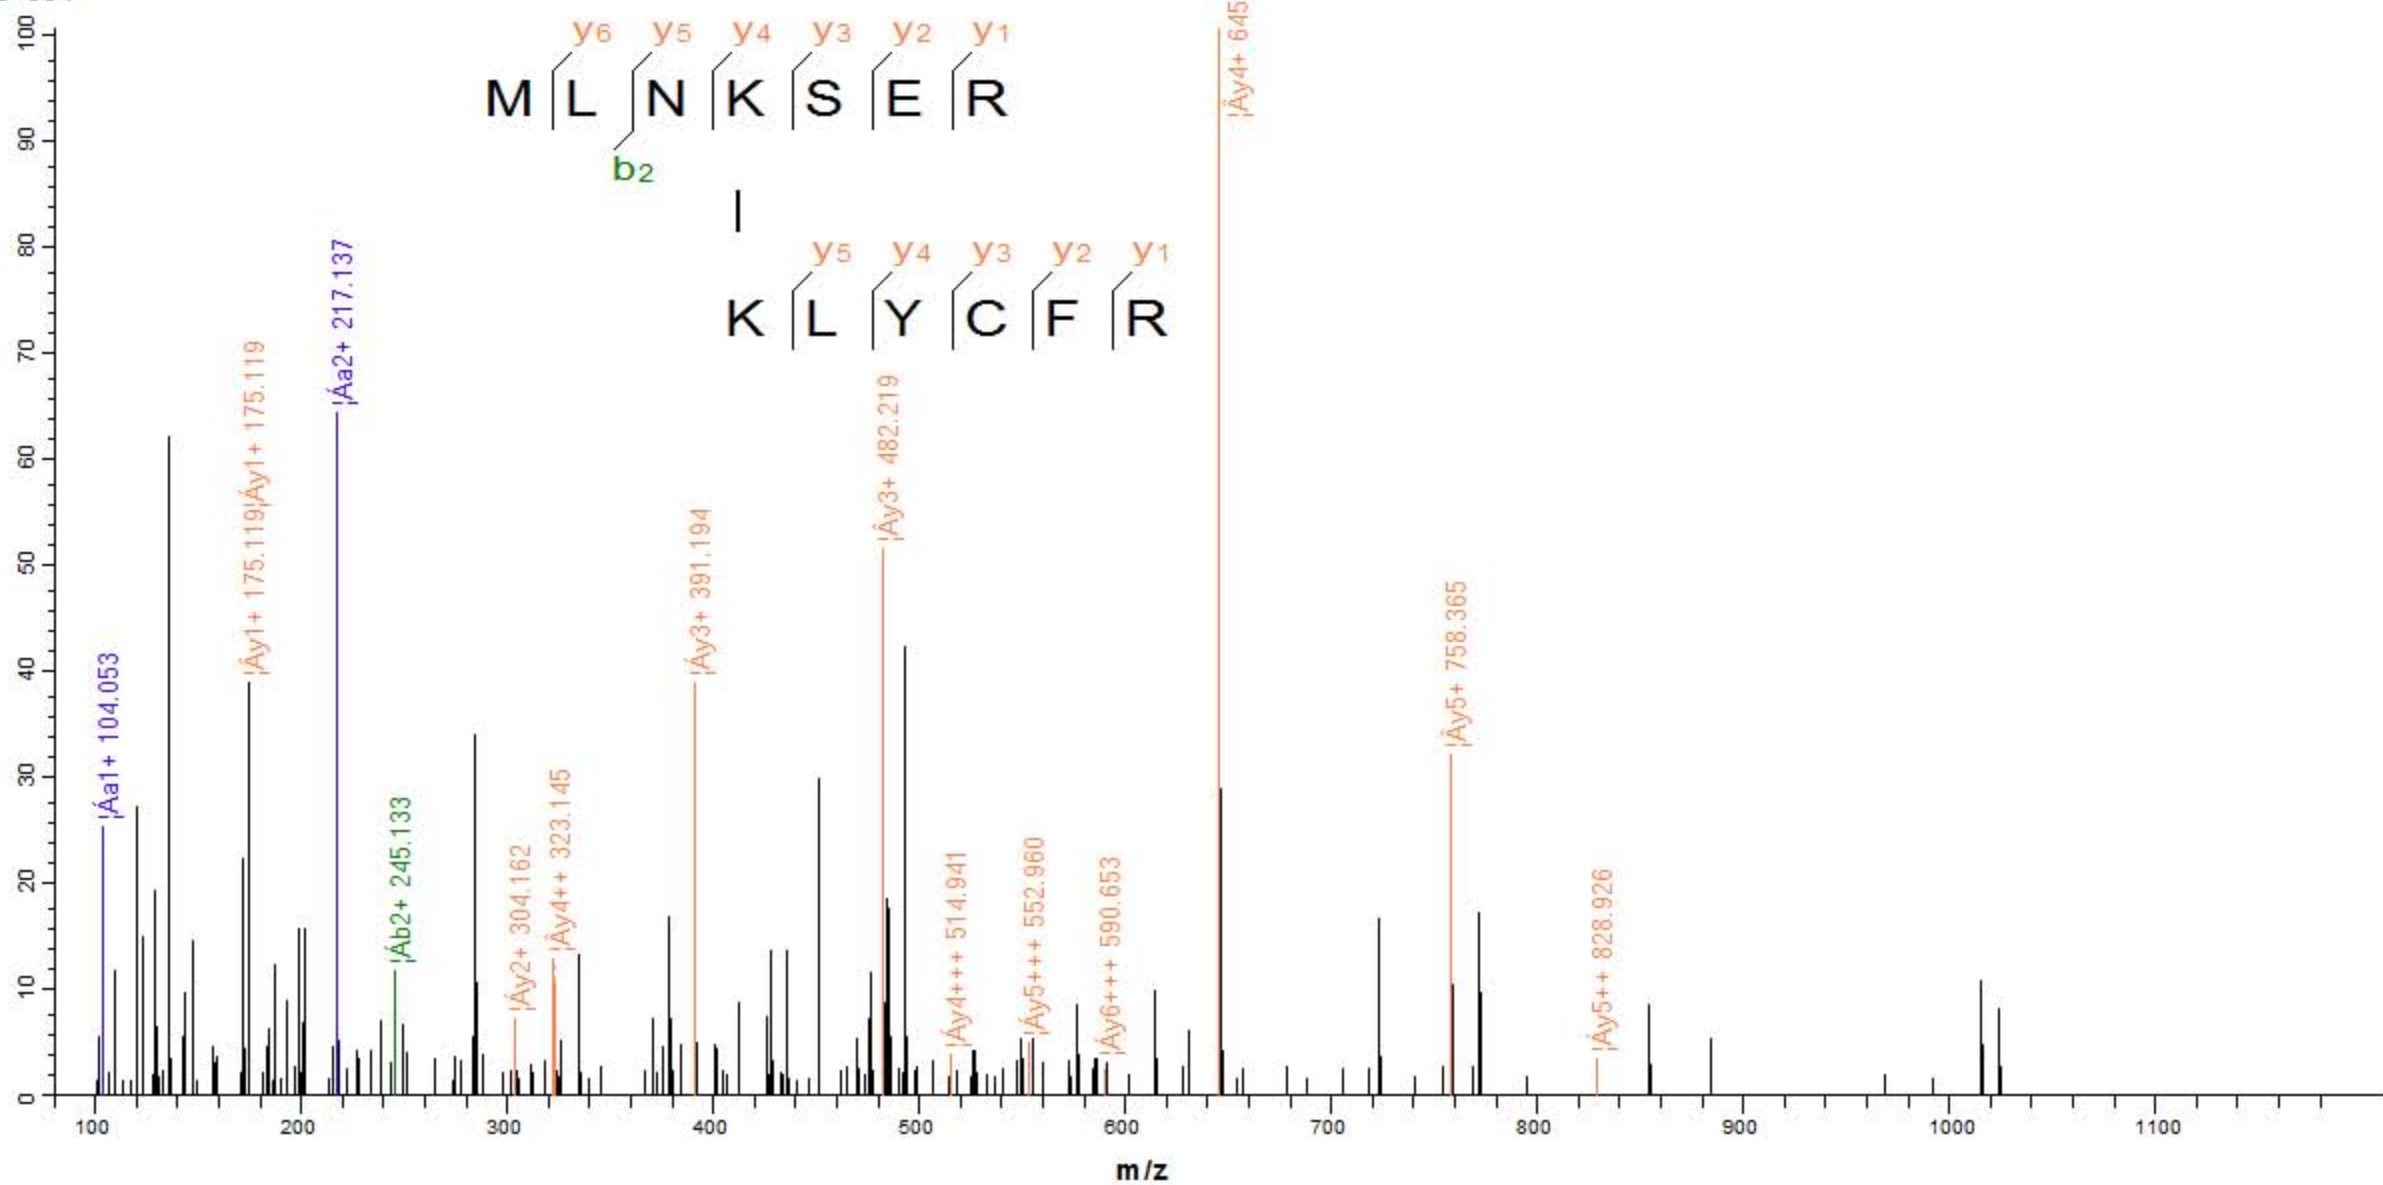

m/z

1.5e+004

Relative Intensity(%)

$y_9$   $y_8$   $y_7$   $y_6$   $y_5$   $y_4$   $y_3$   $y_2$   $y_1$   
 N | N | P | S | I | G | D | S | K | A | K  
 $b_1$   $b_2$   $b_3$   $b_4$

|  
 M | L | N | K | S | E | R  
 $b_2$   $b_3$   $b_4$

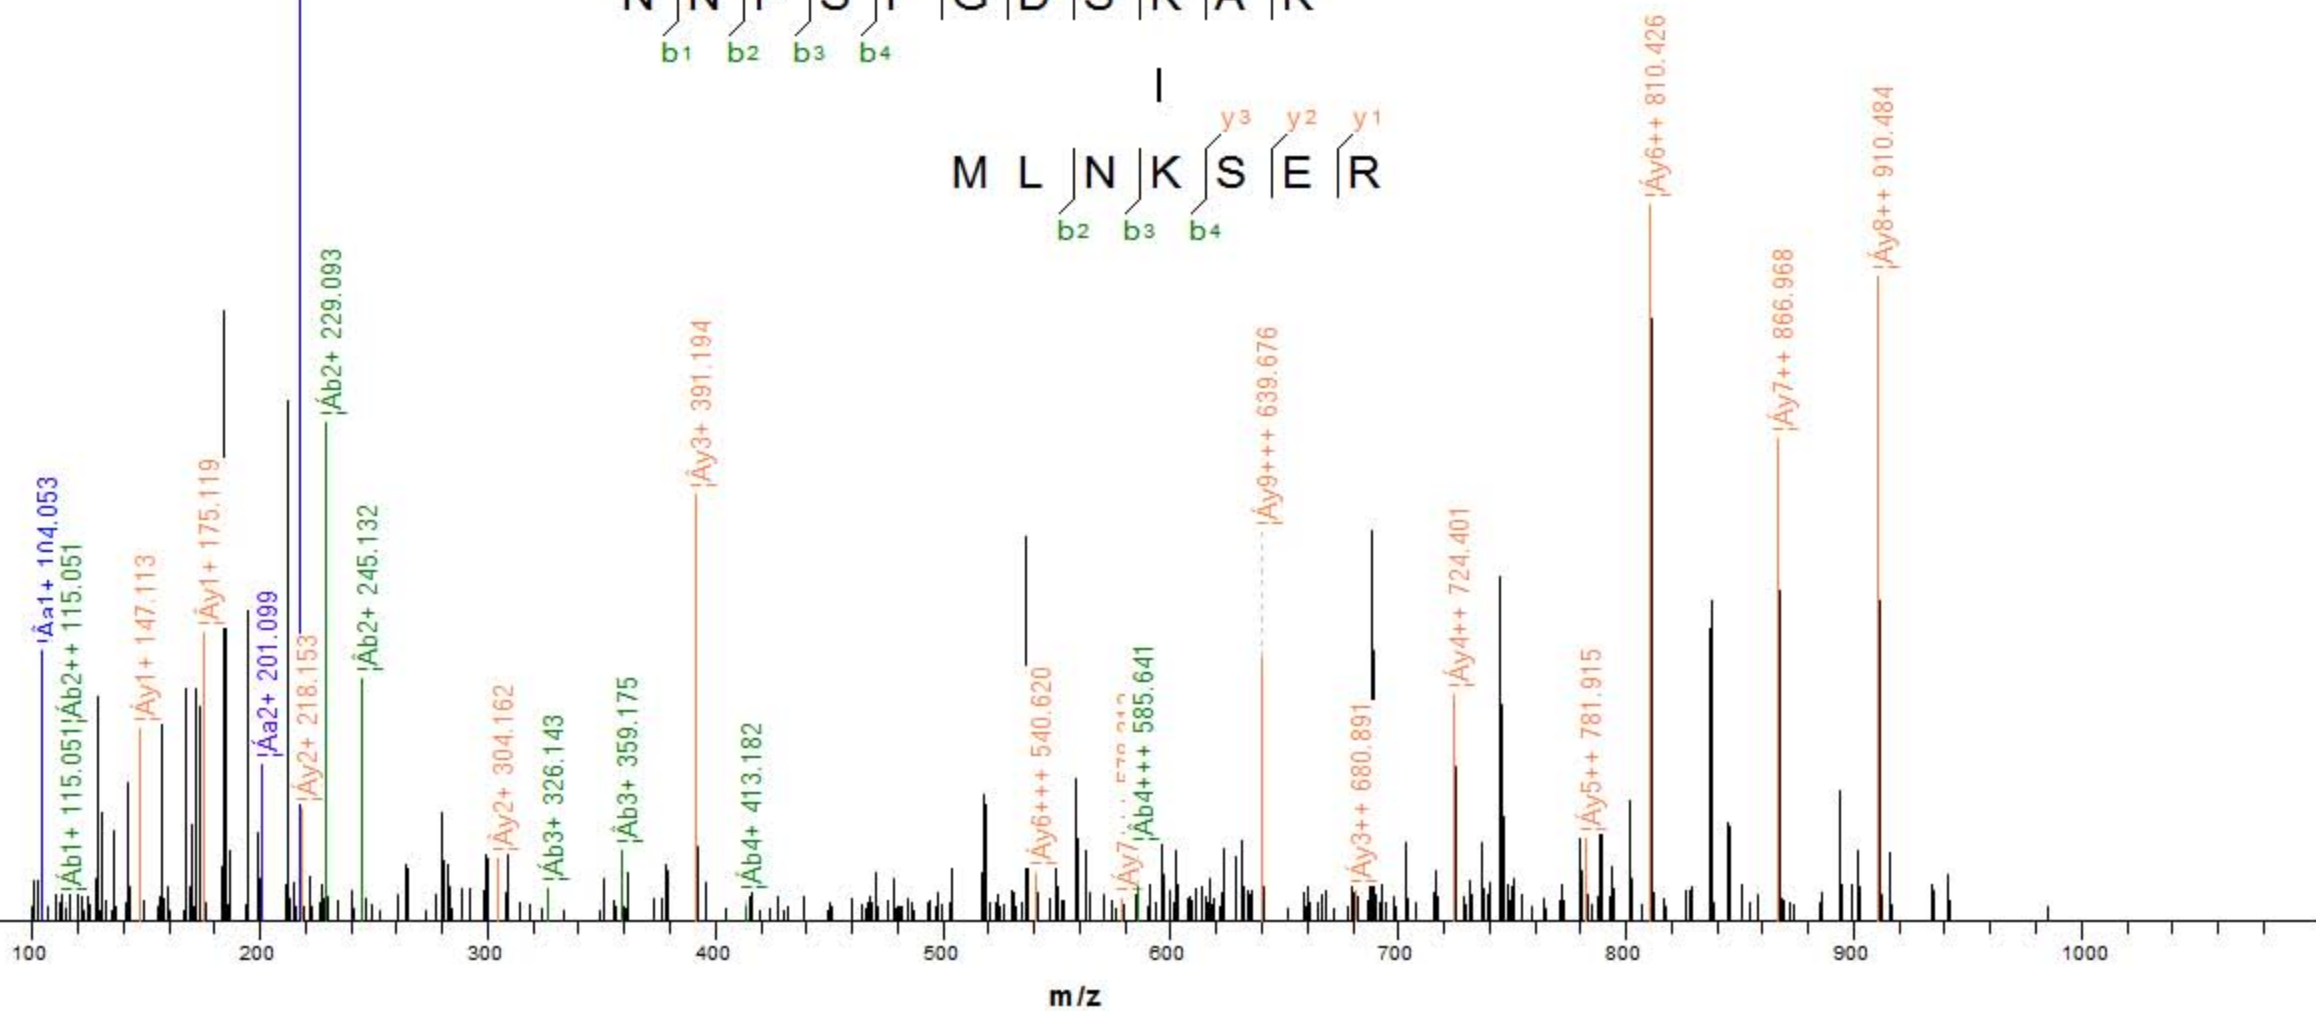

m/z

2.8e+004

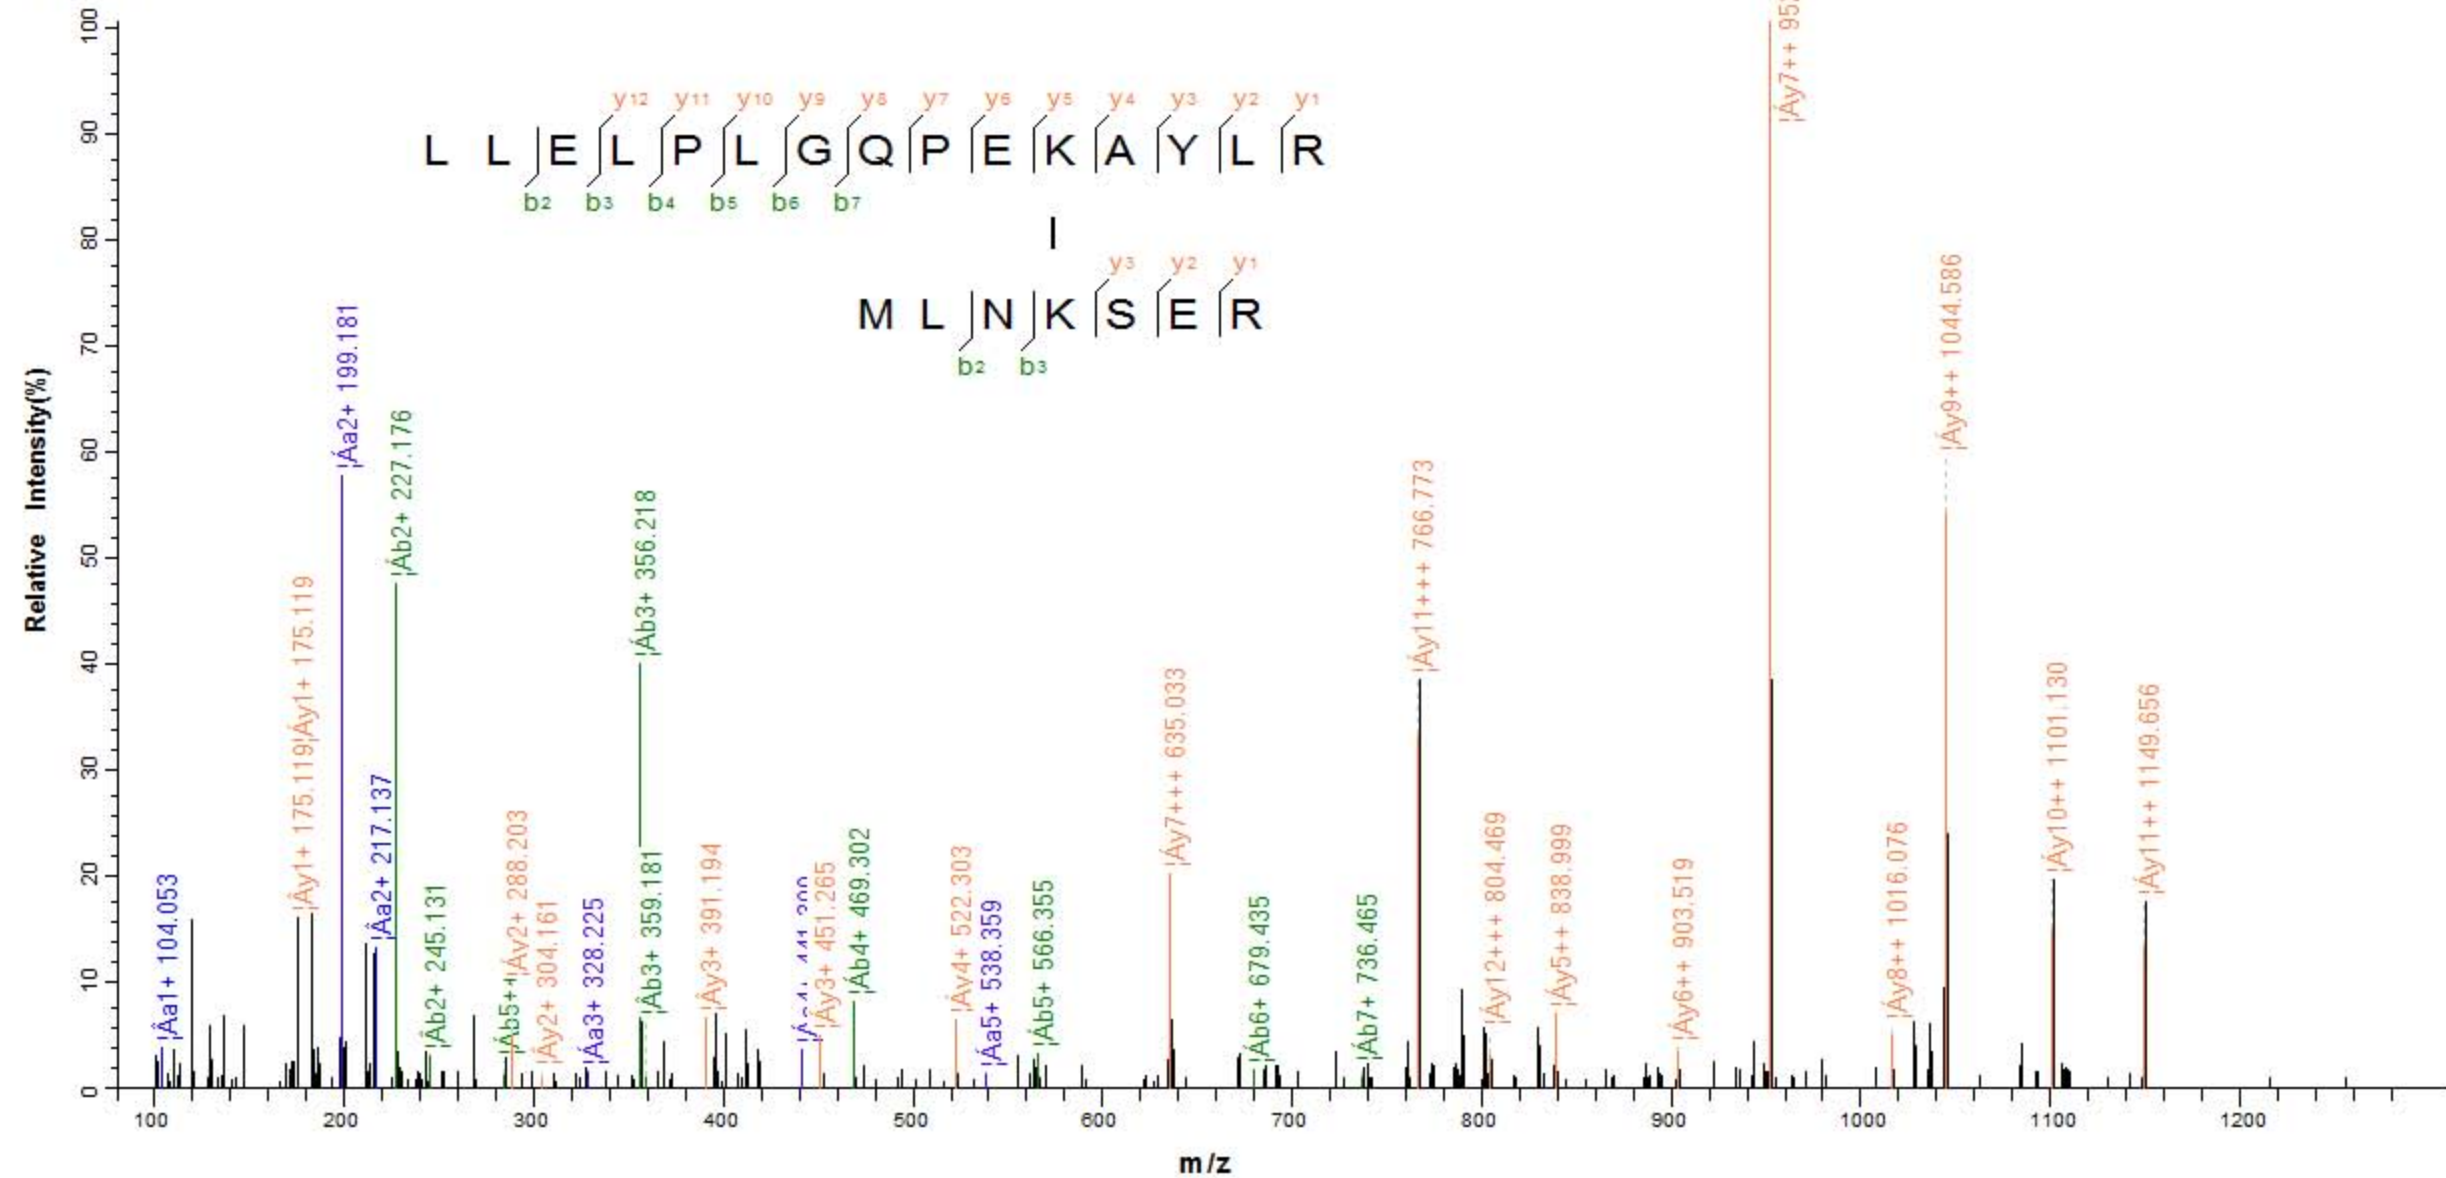

3.4e+004

Relative Intensity(%)

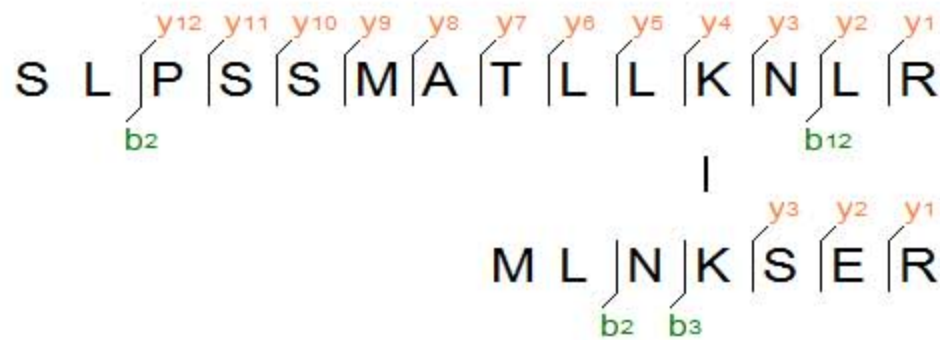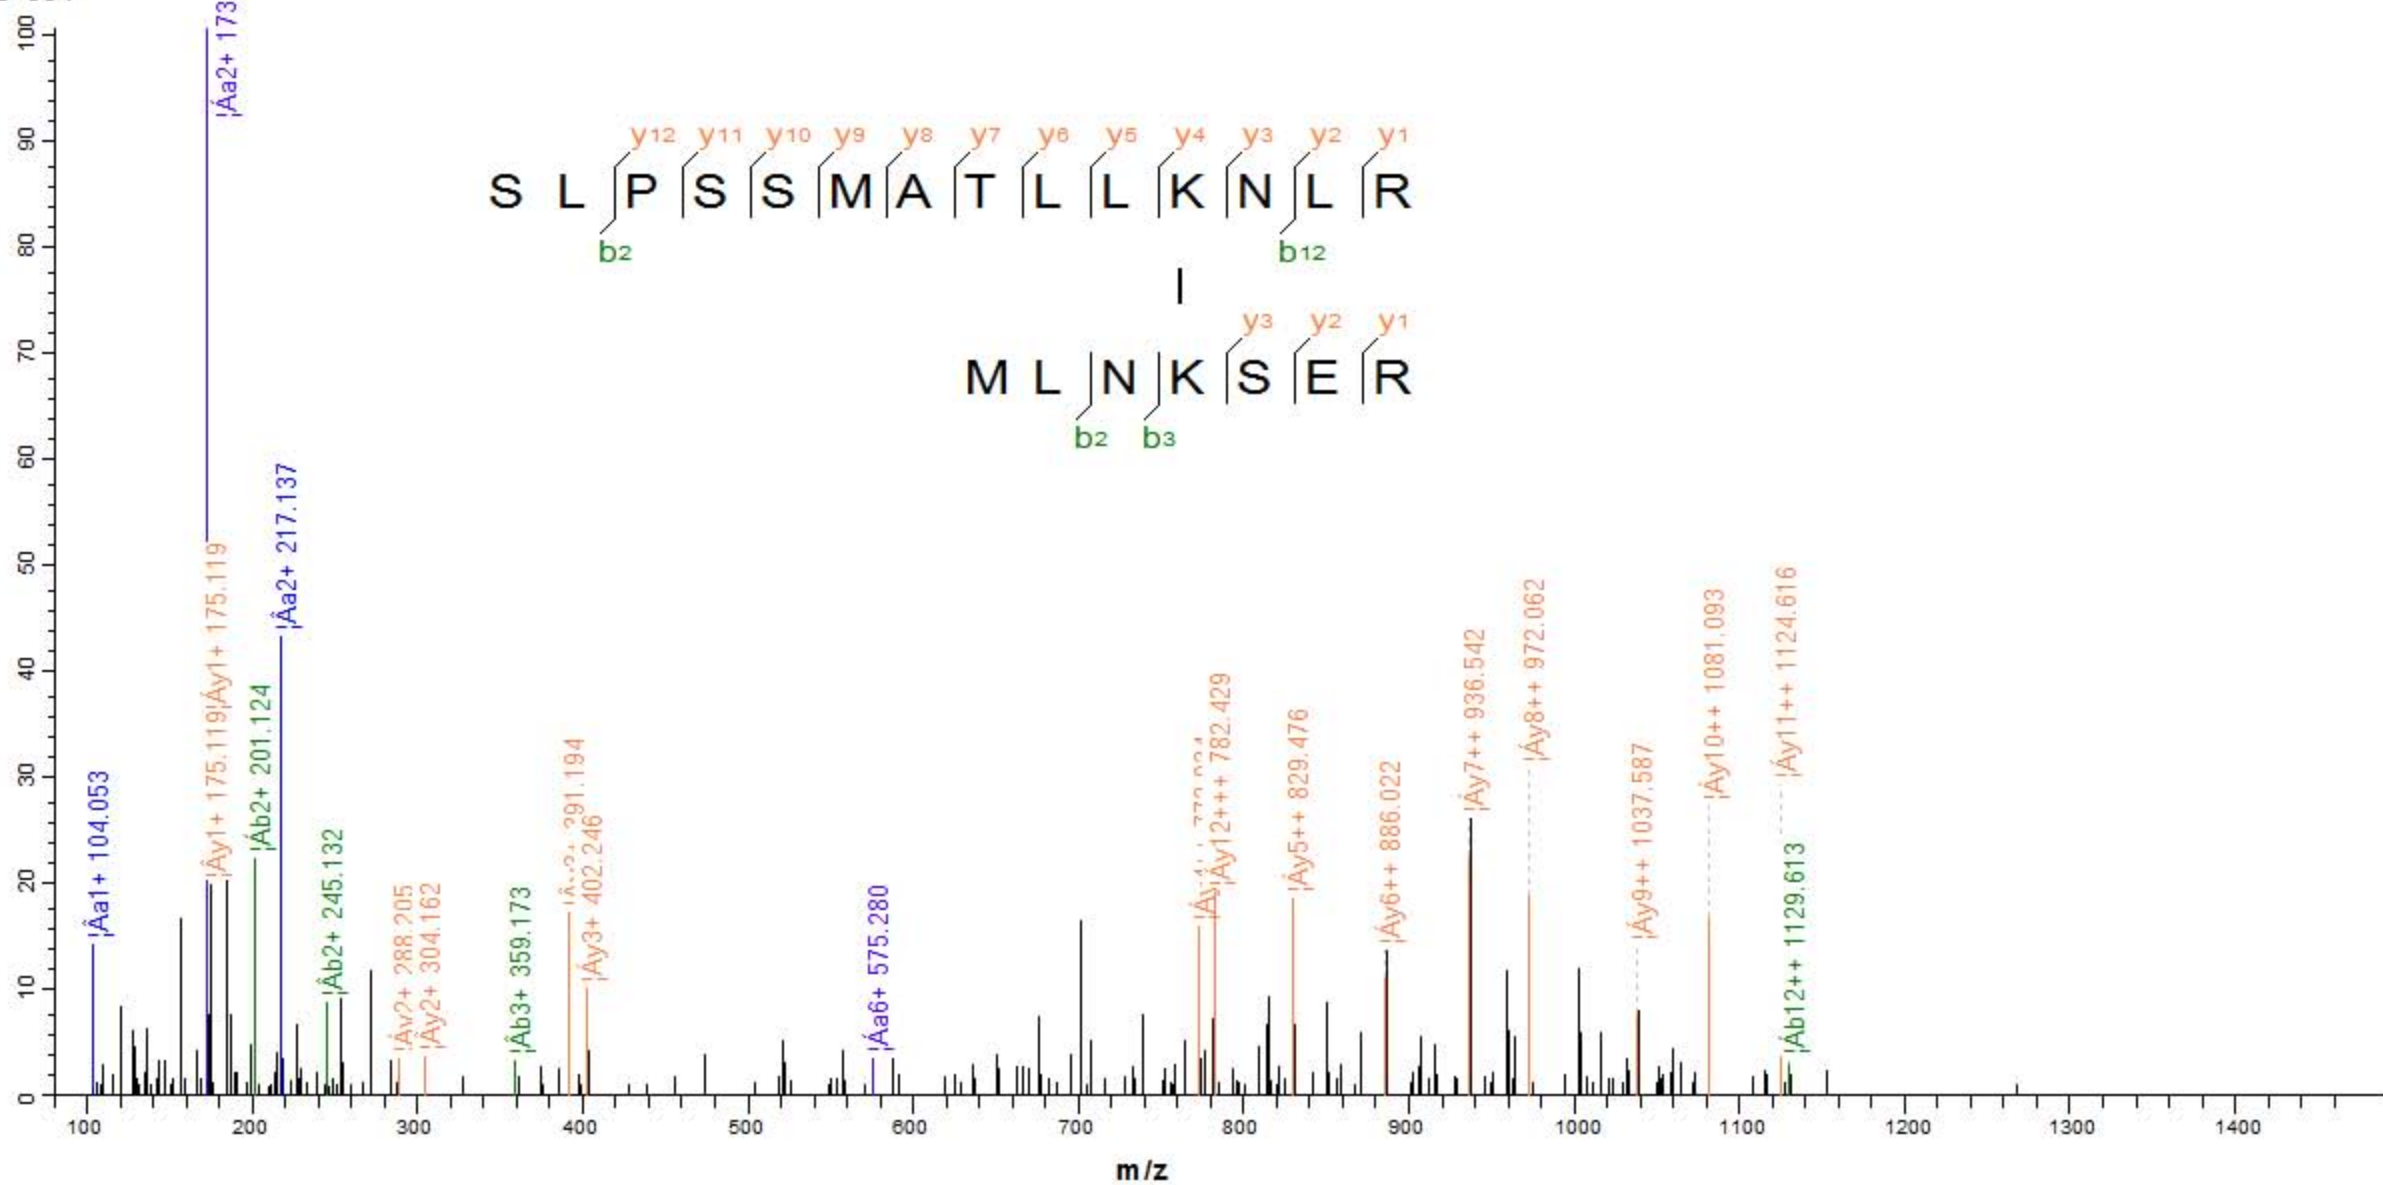

m/z

7.6e+003

Relative Intensity(%)

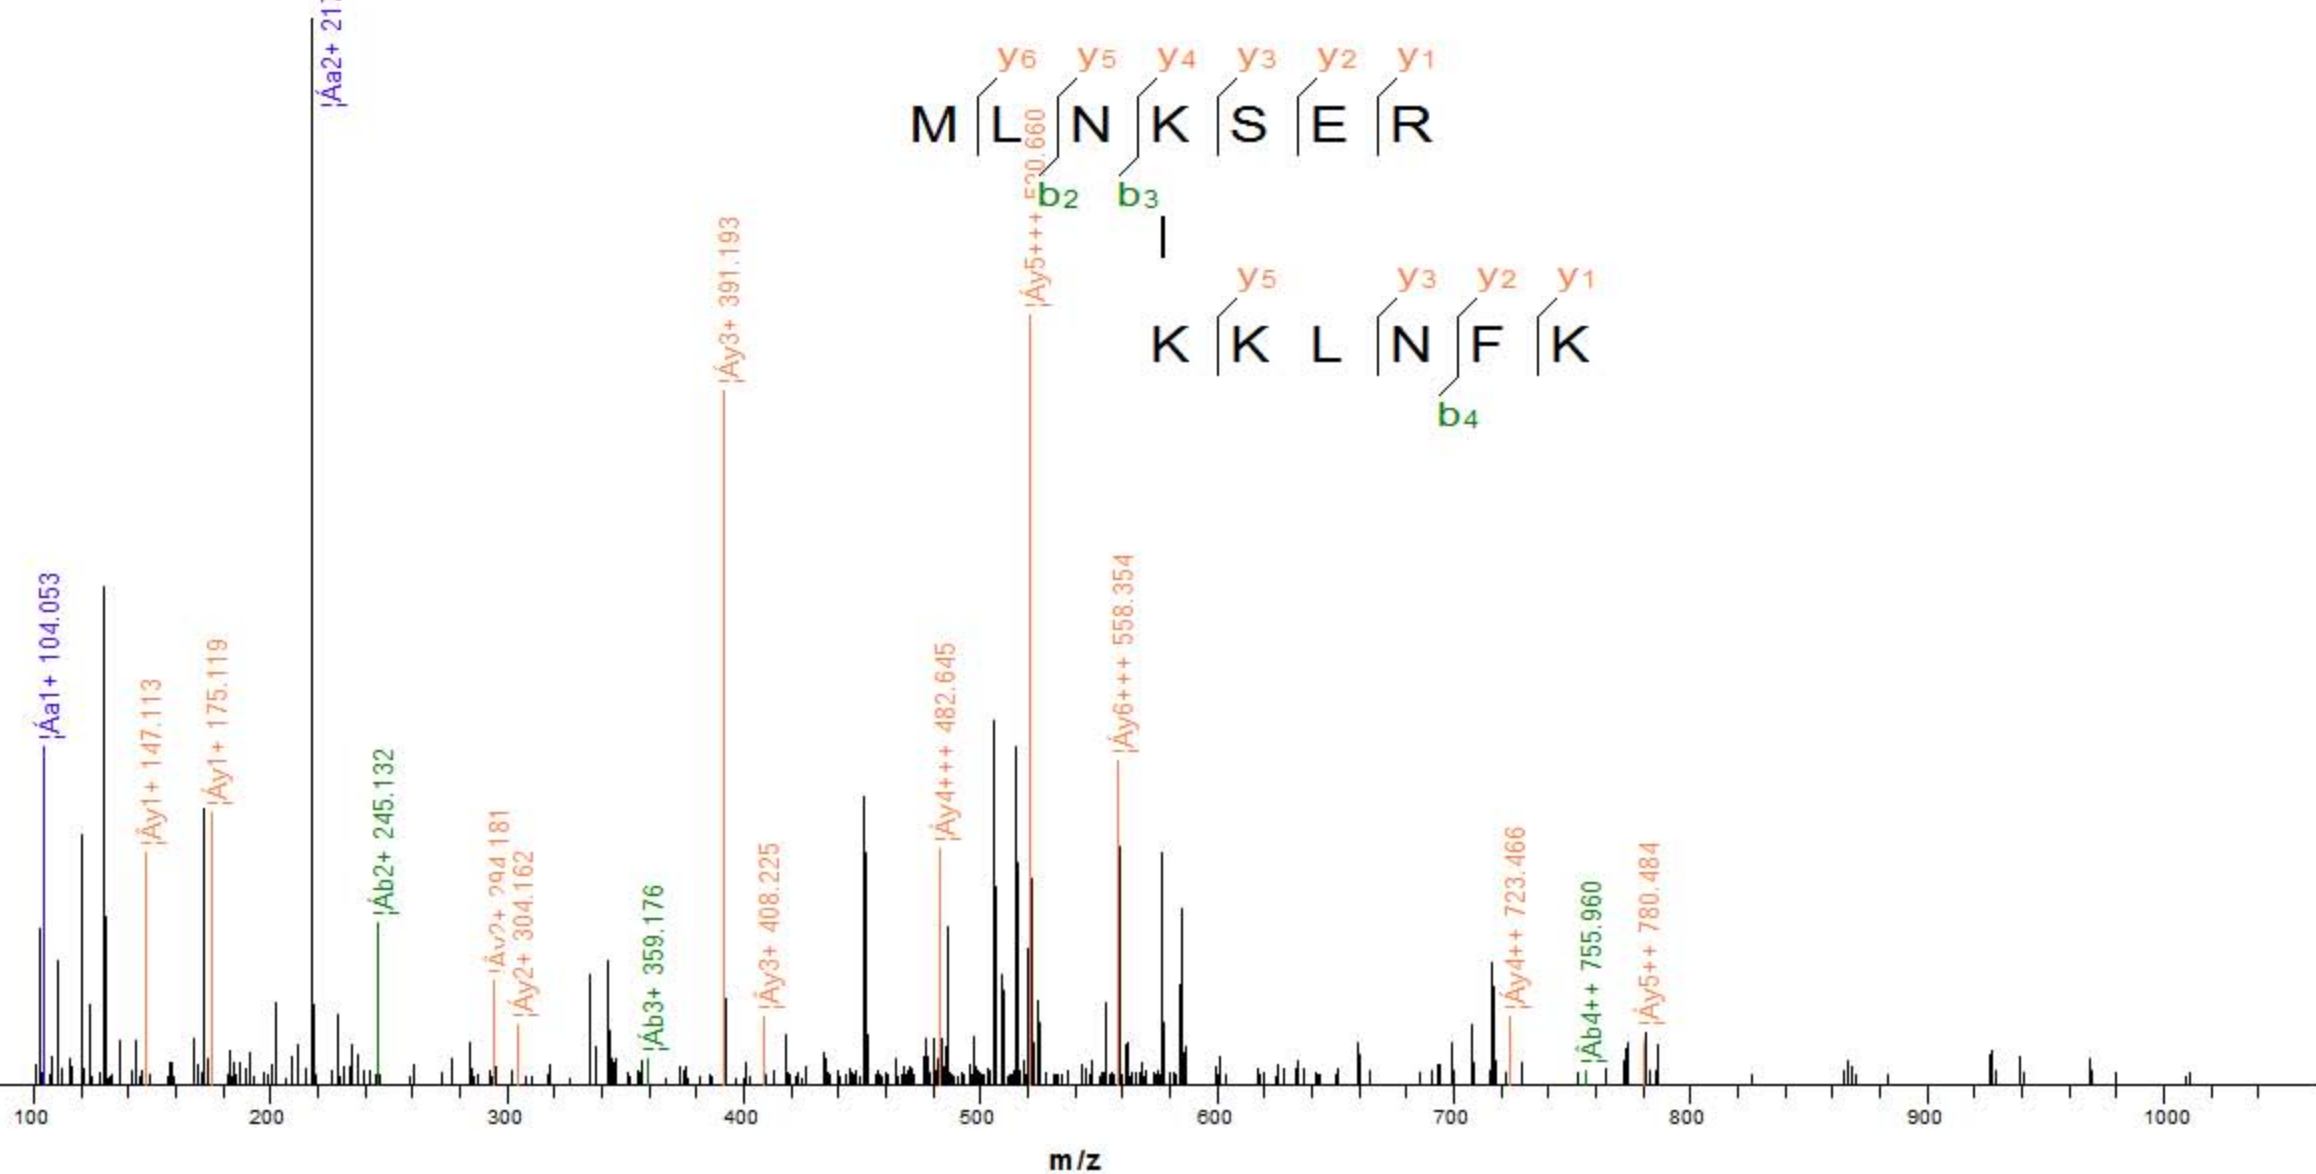

2.9e+004

Relative Intensity(%)

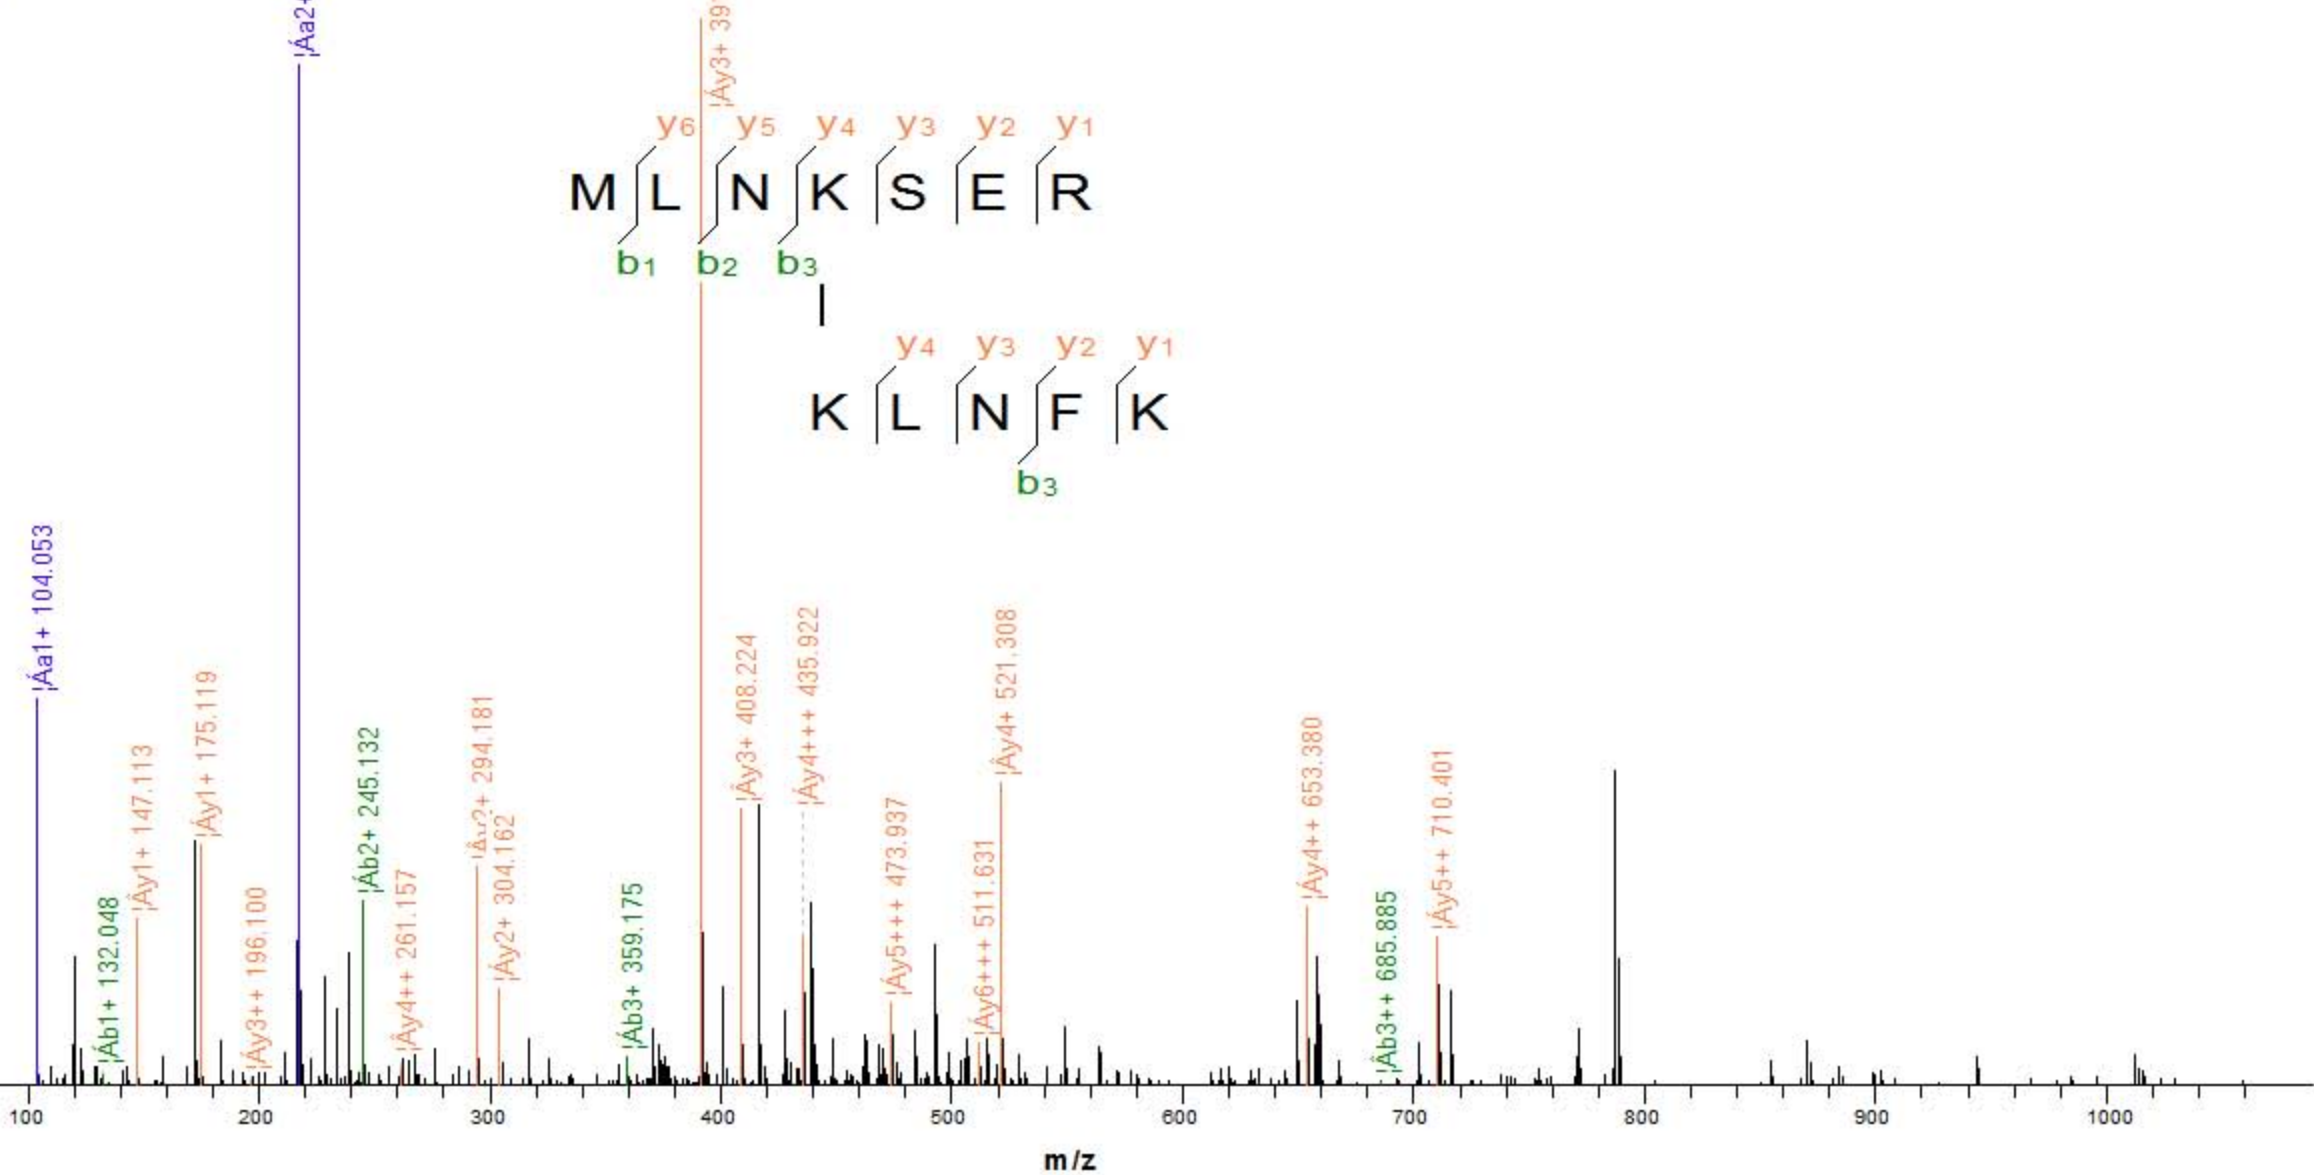



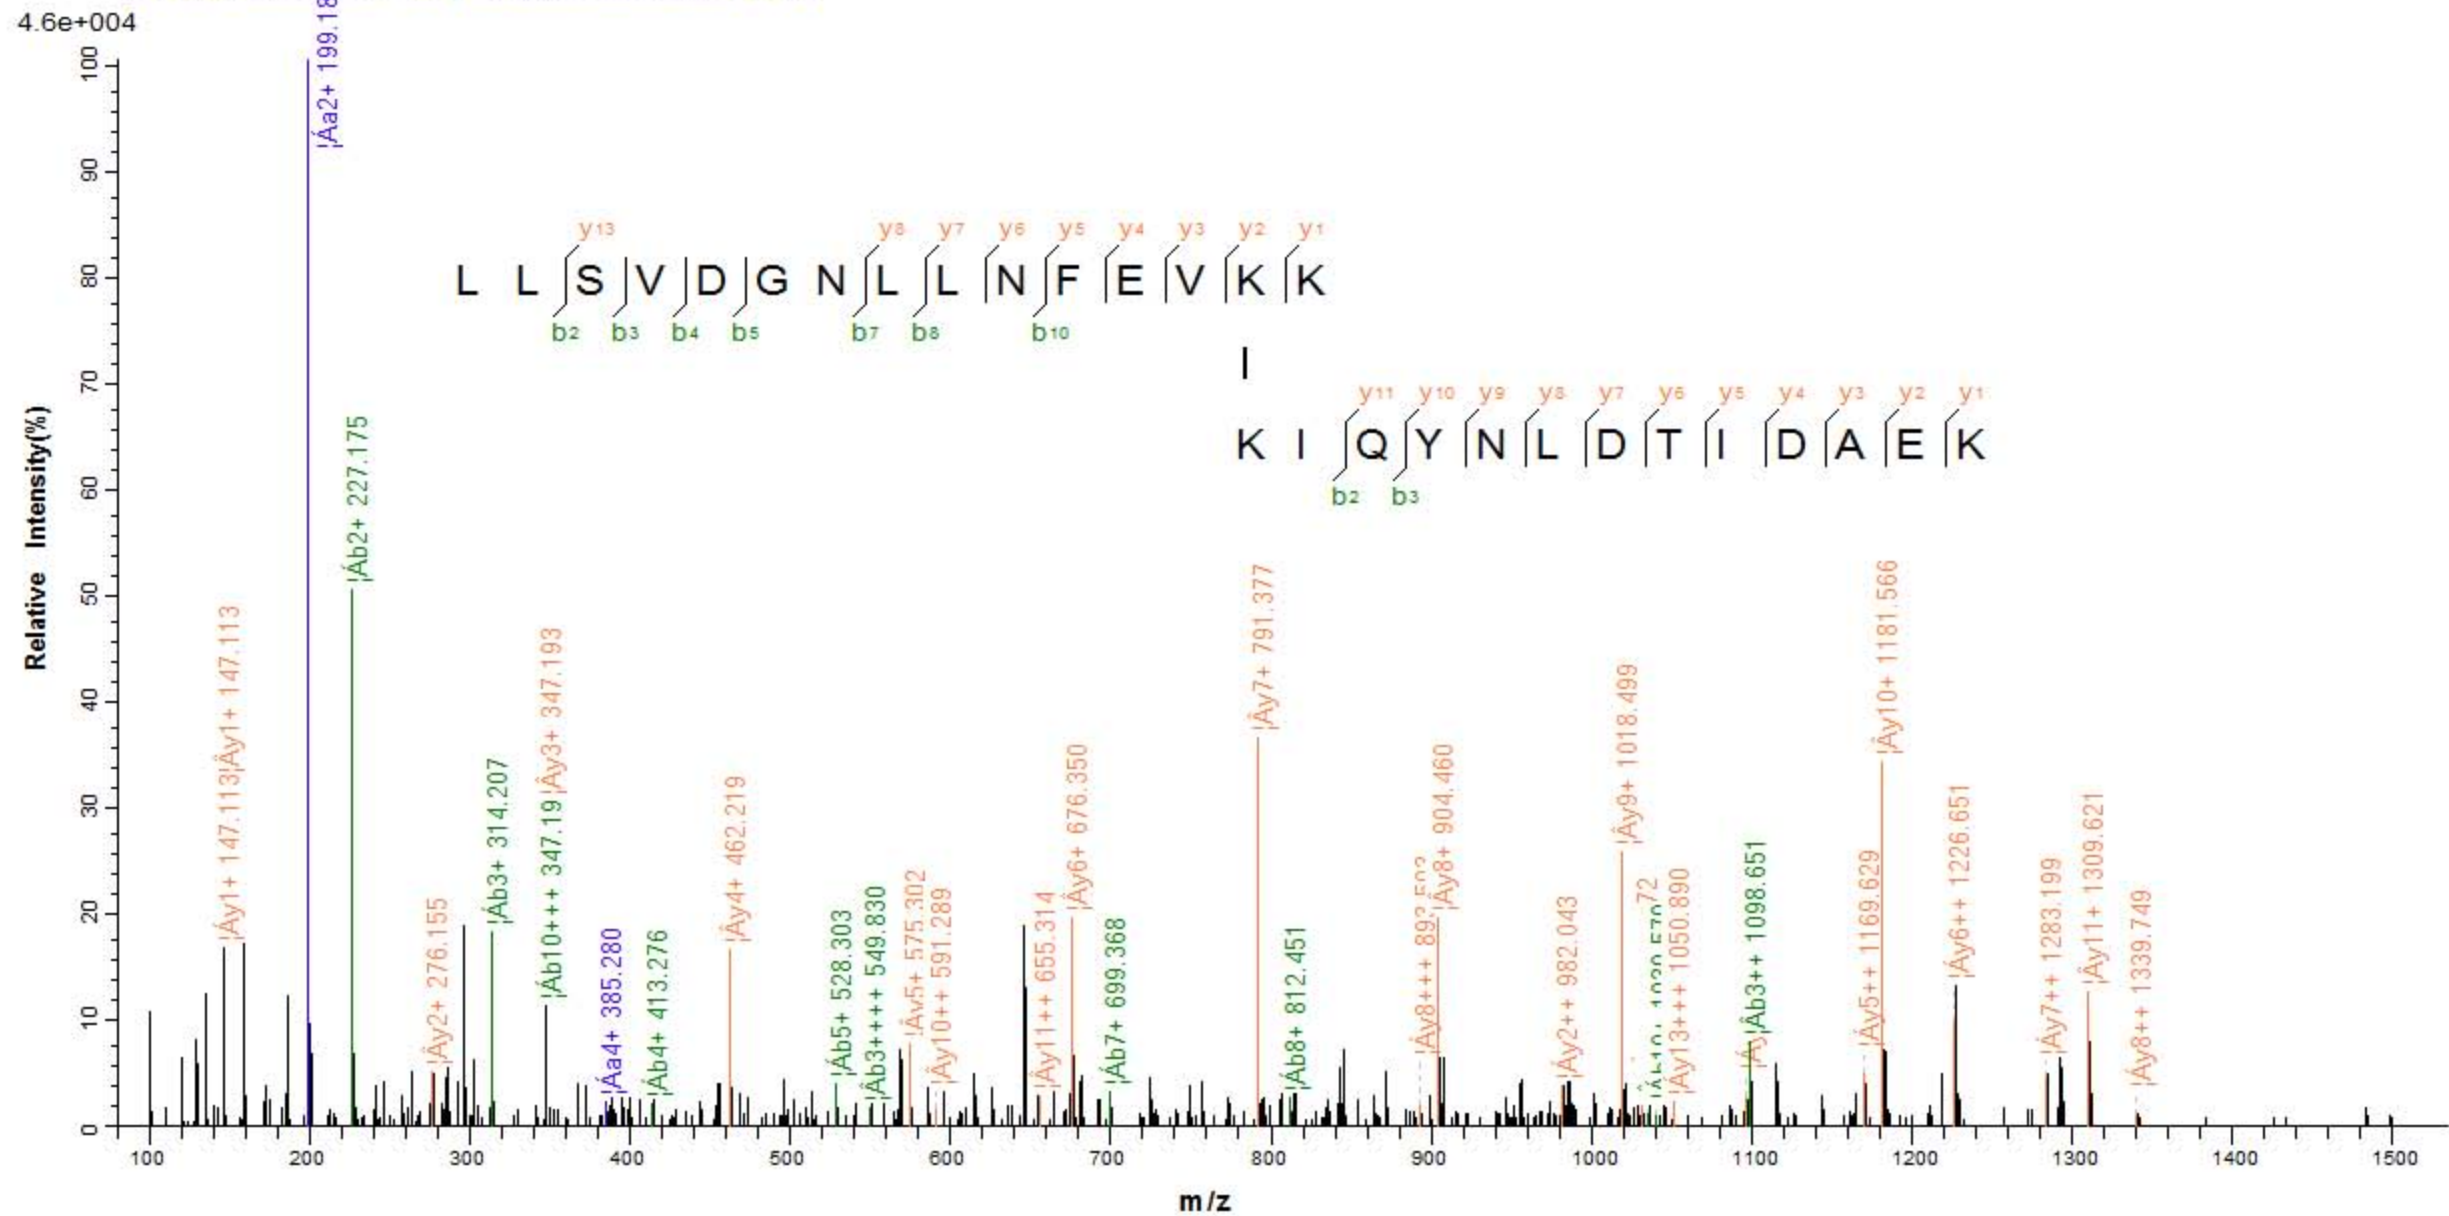

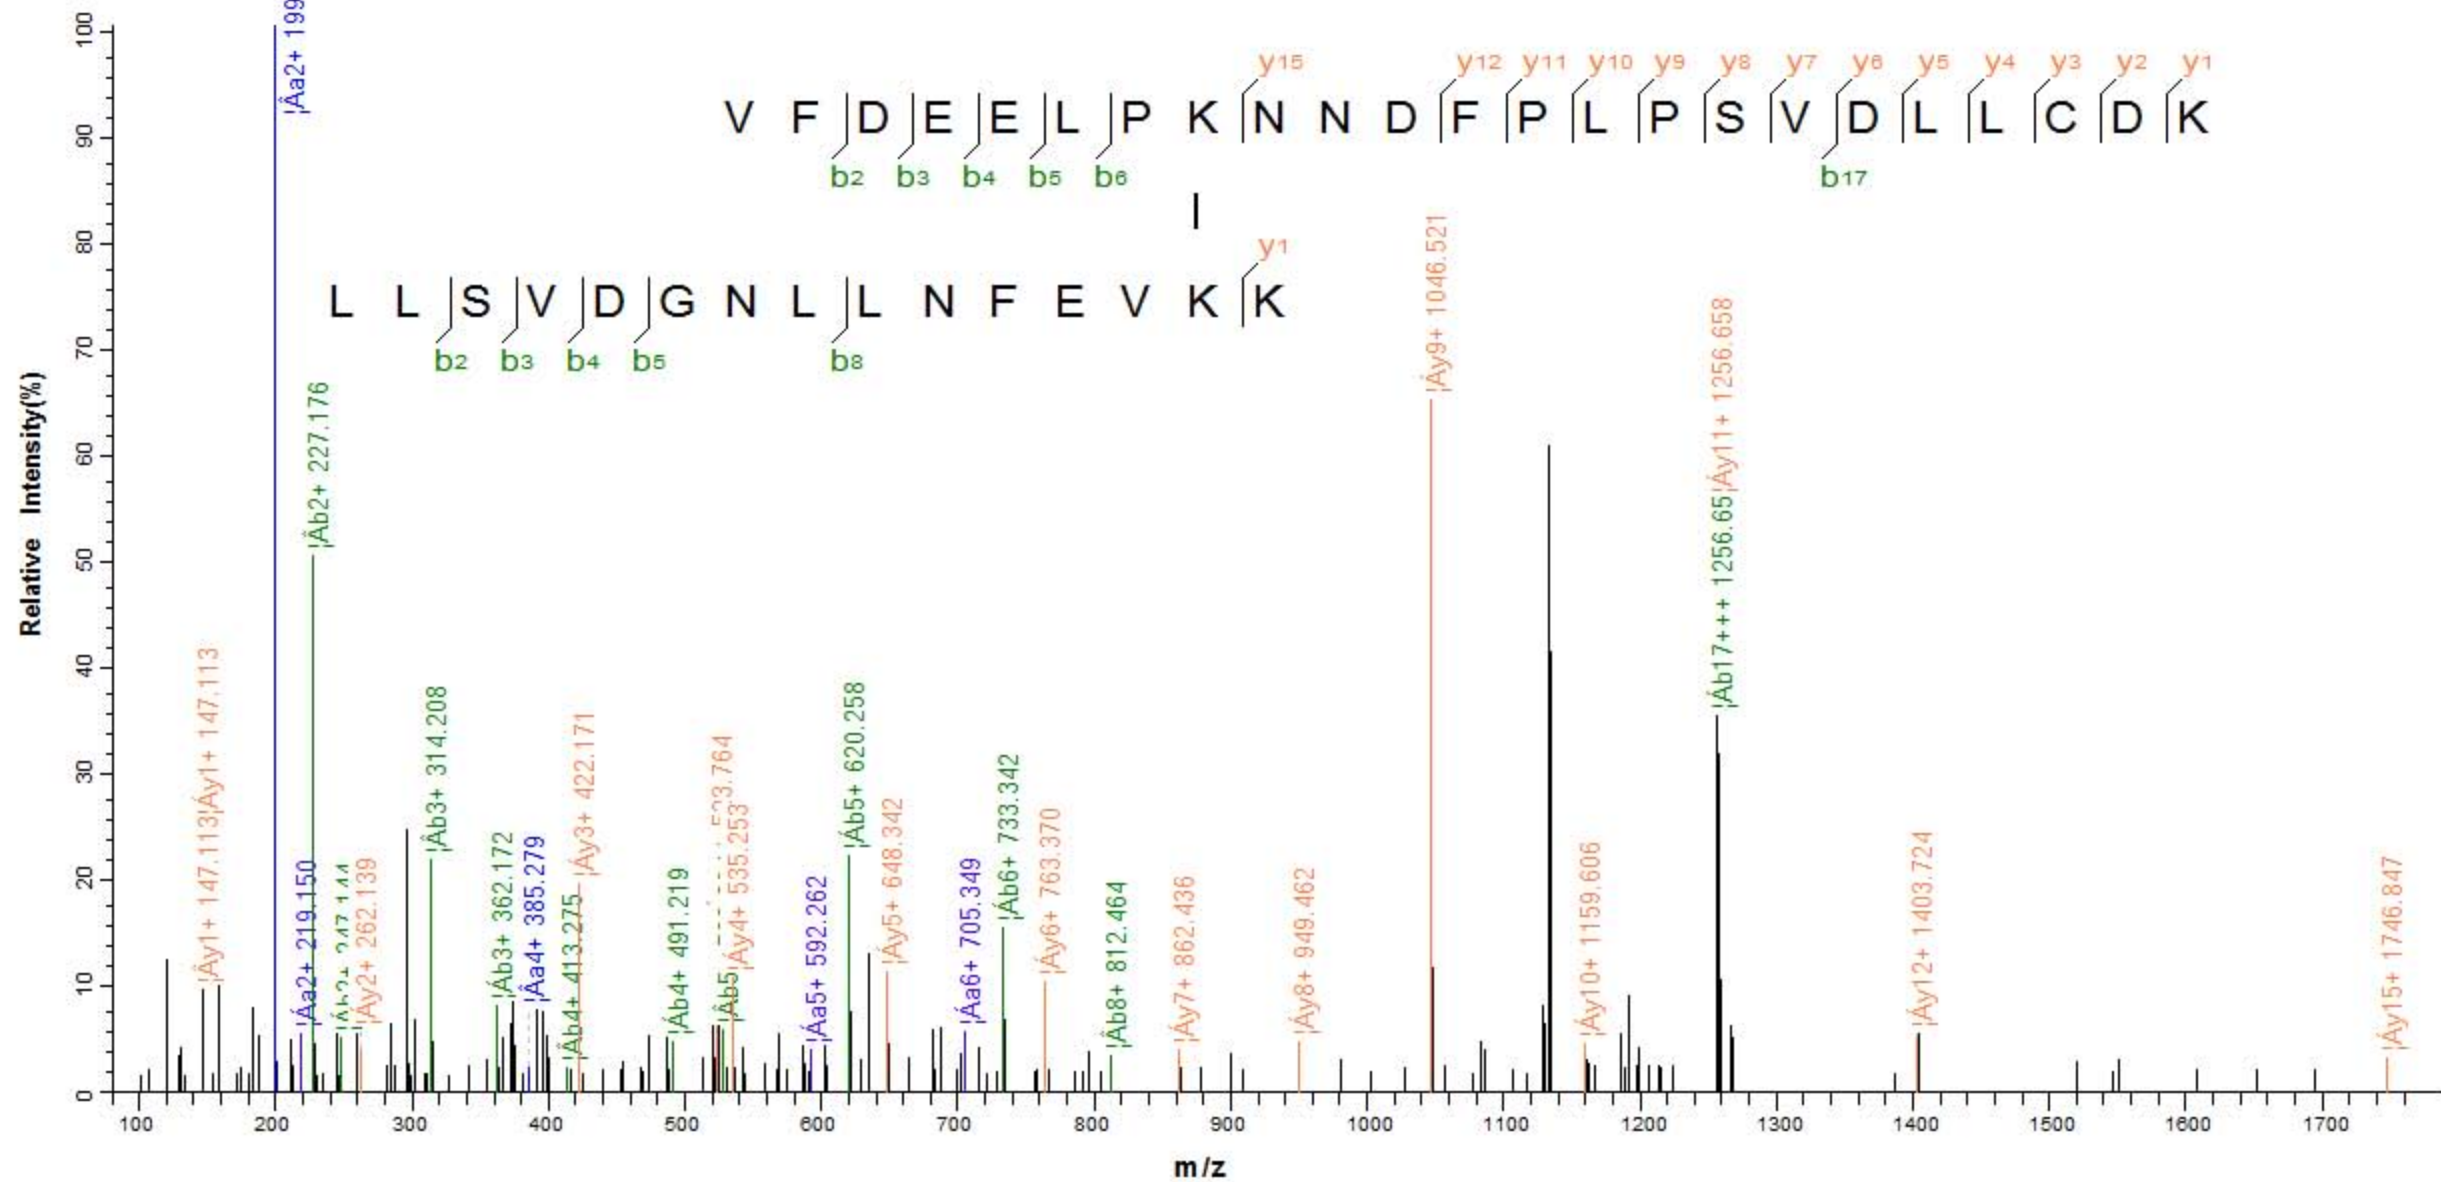

5.6e+003

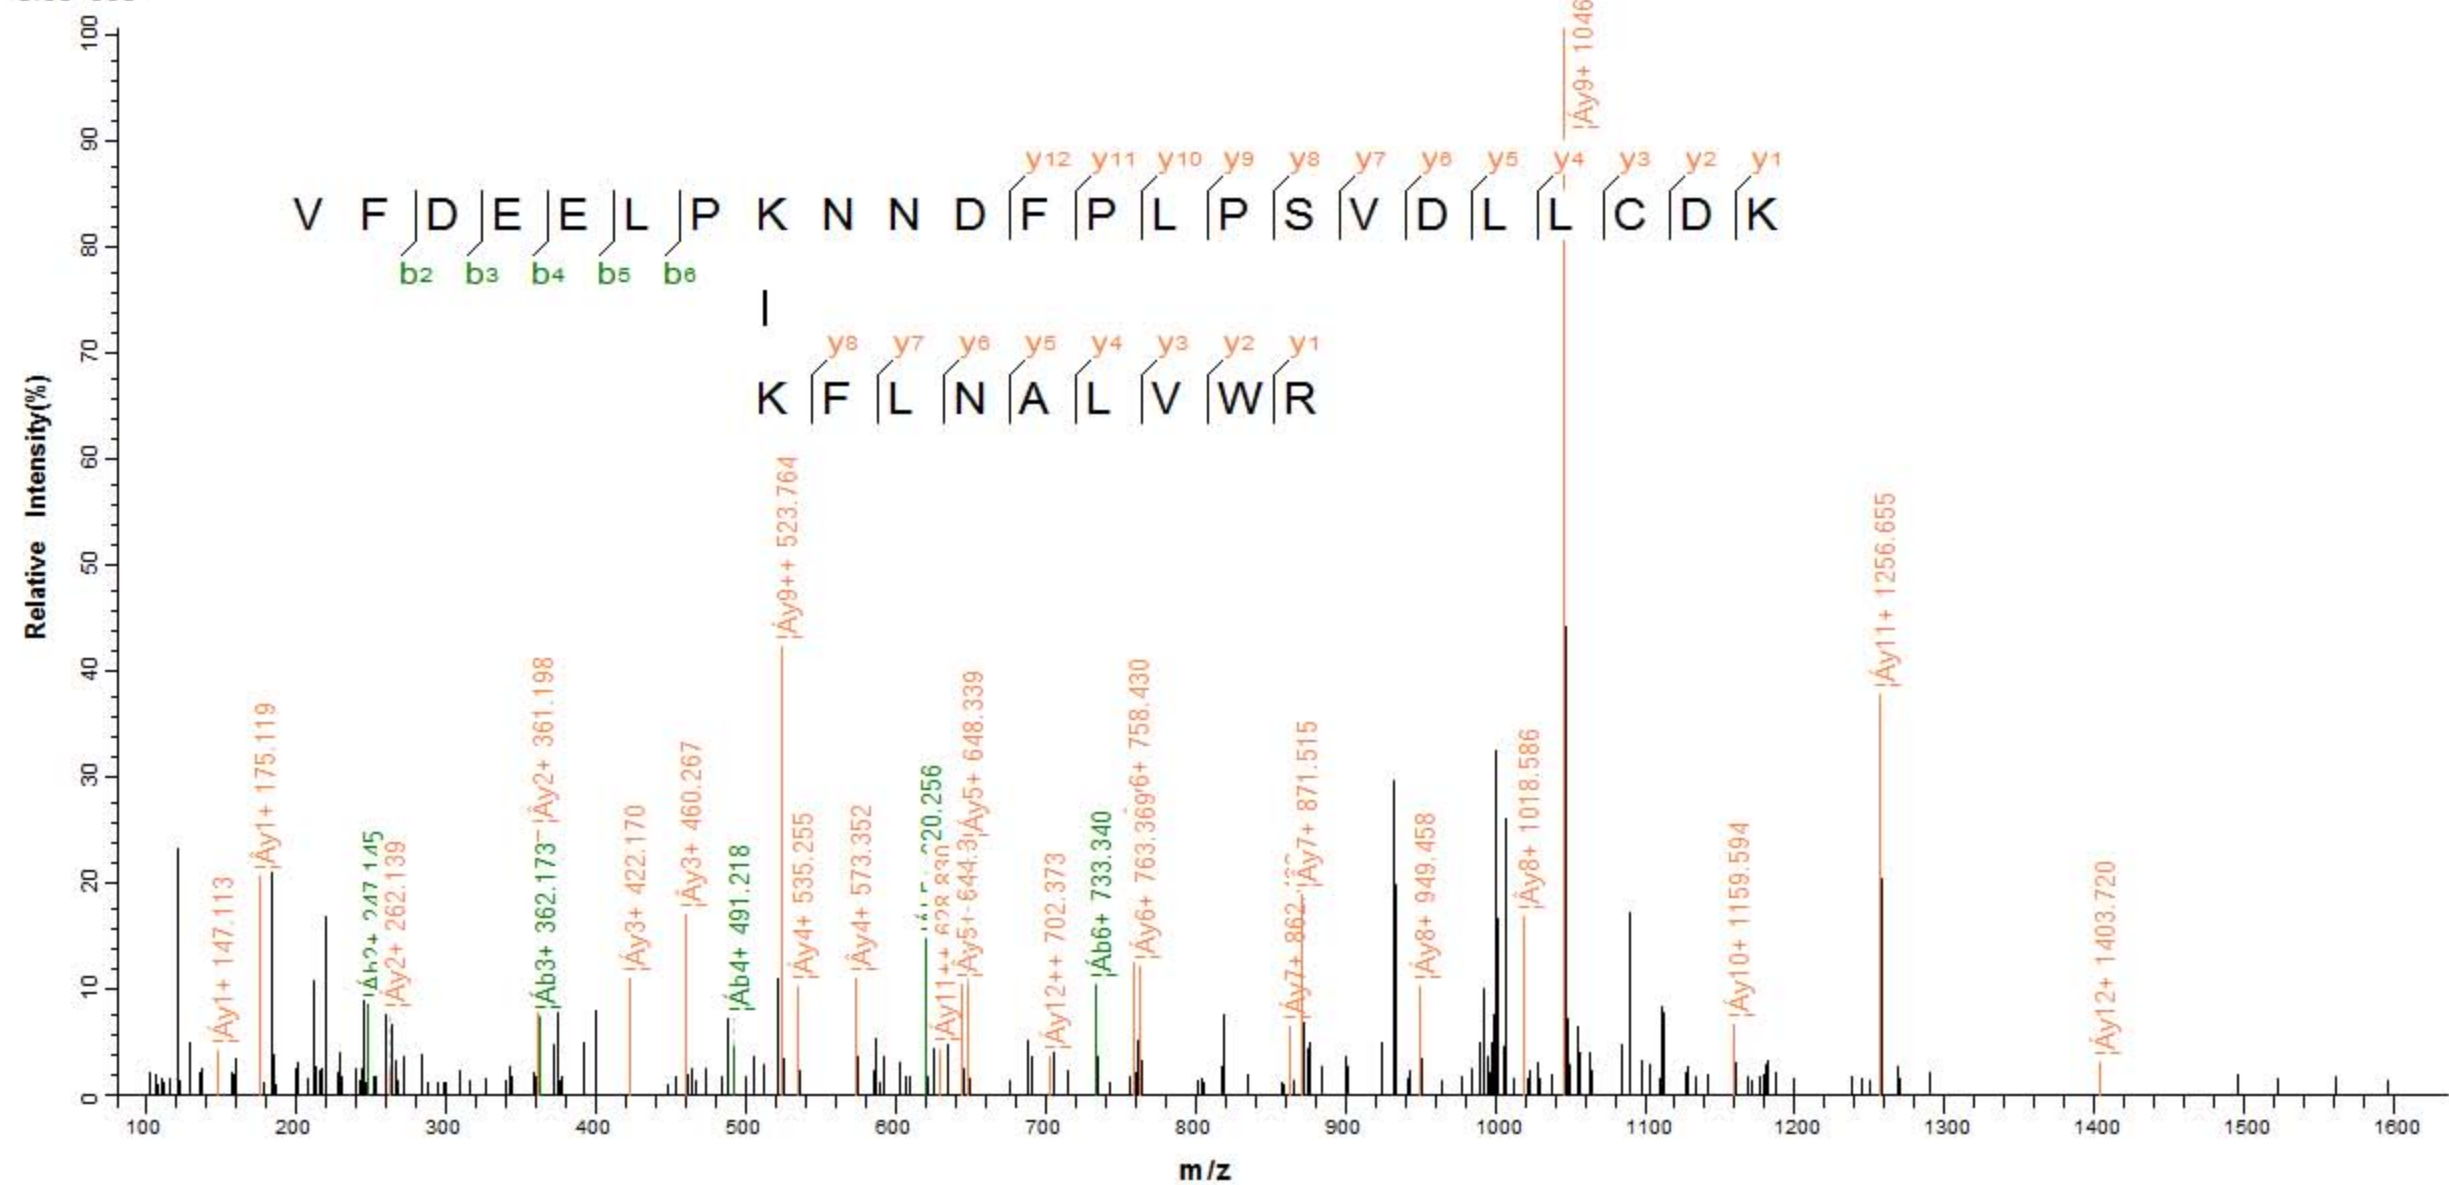

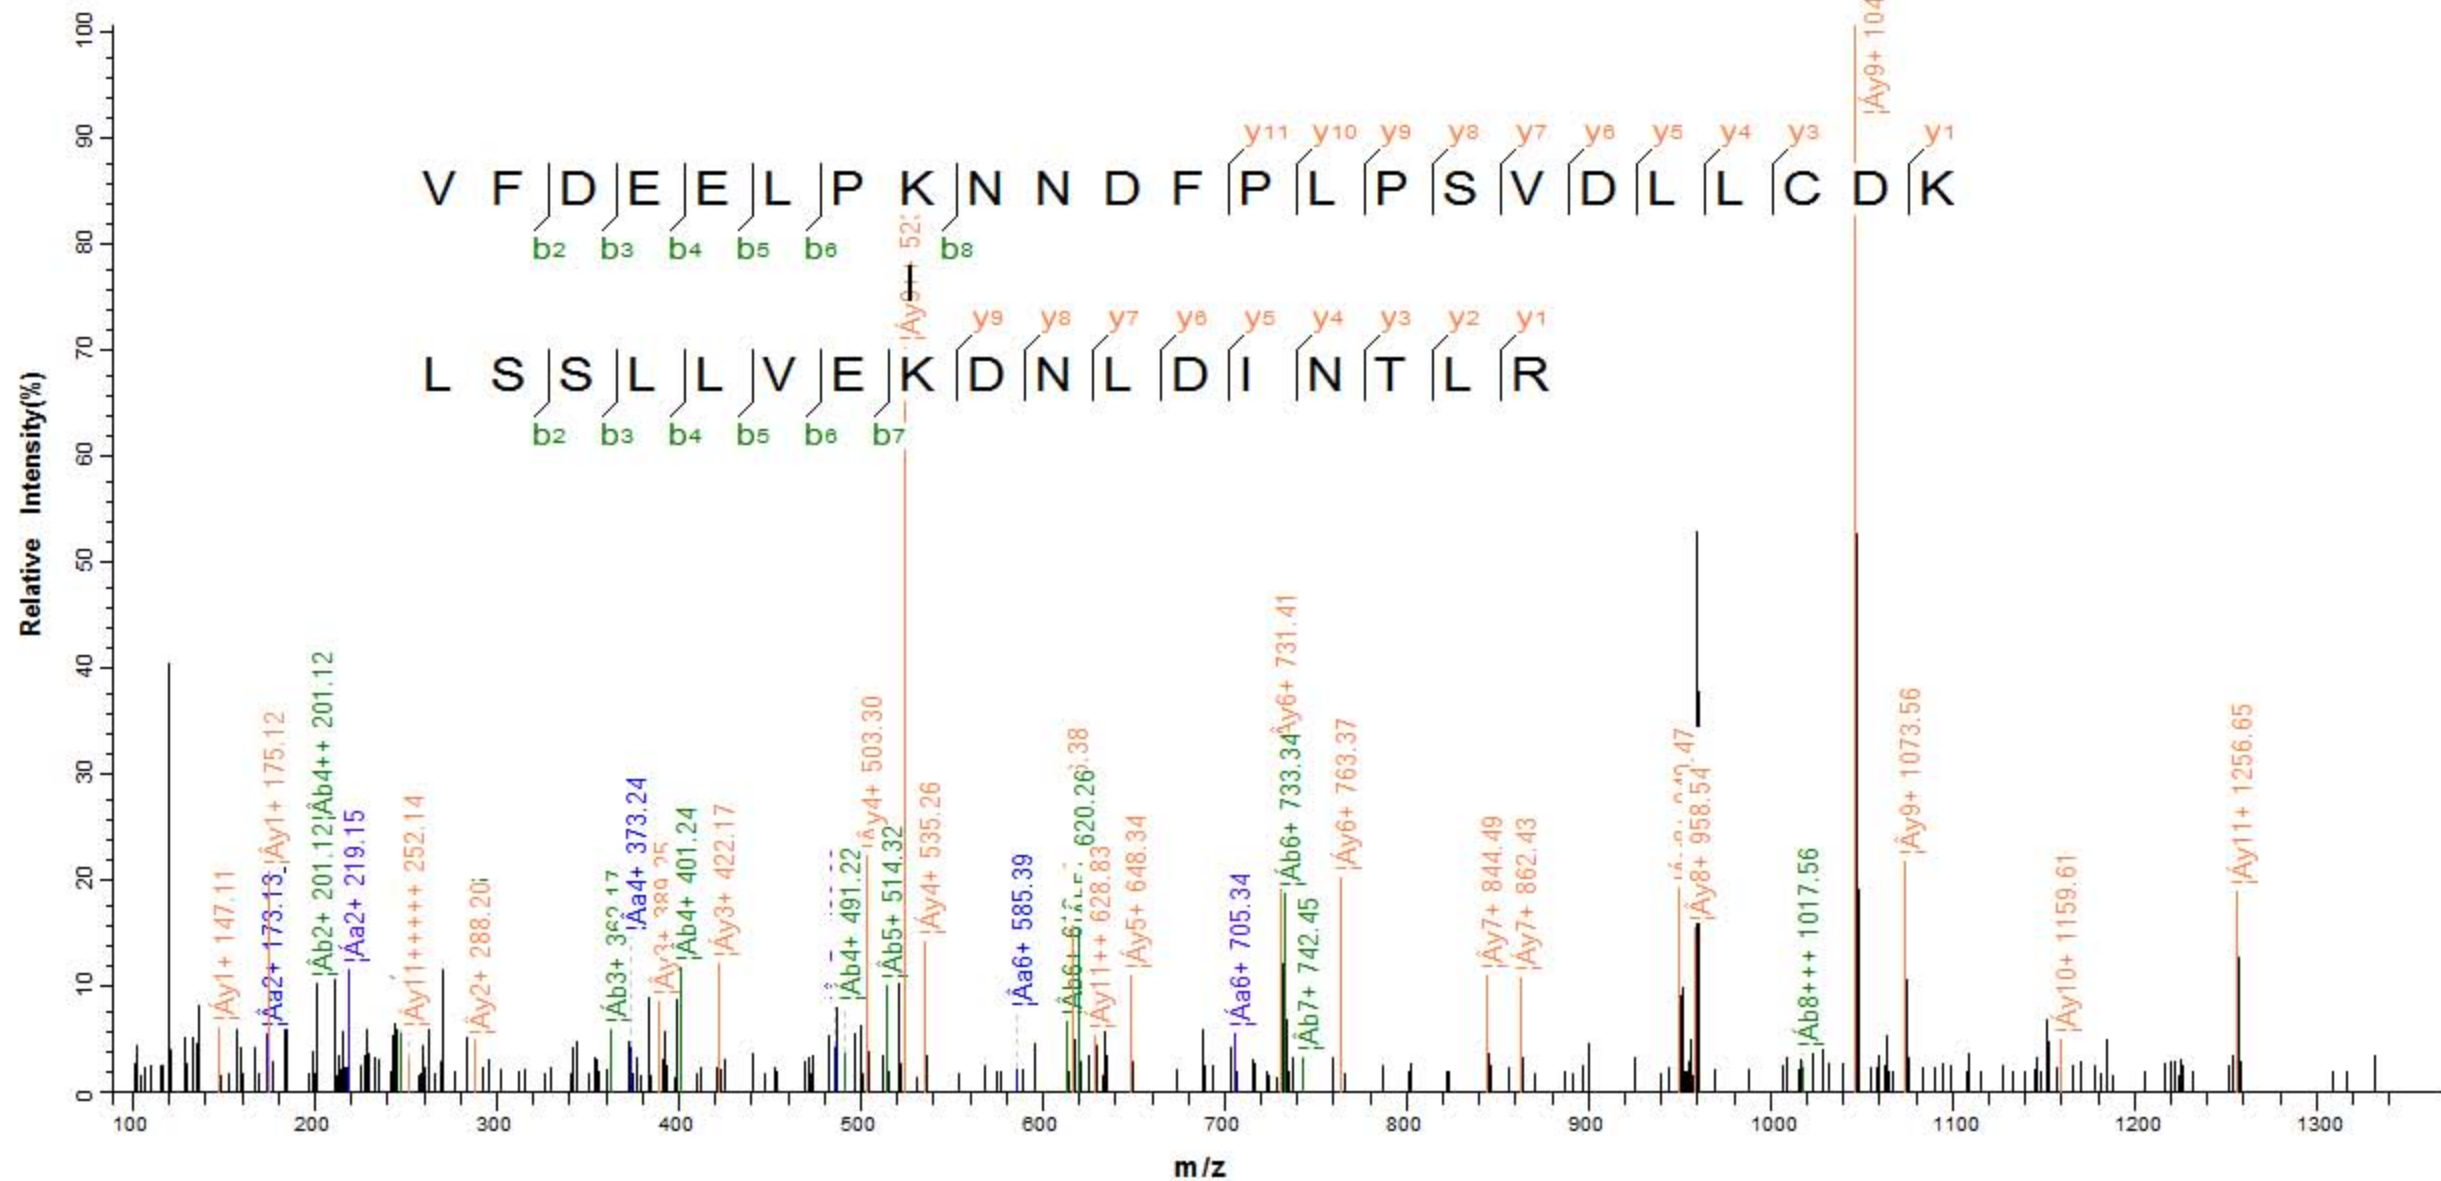

4.1e+004

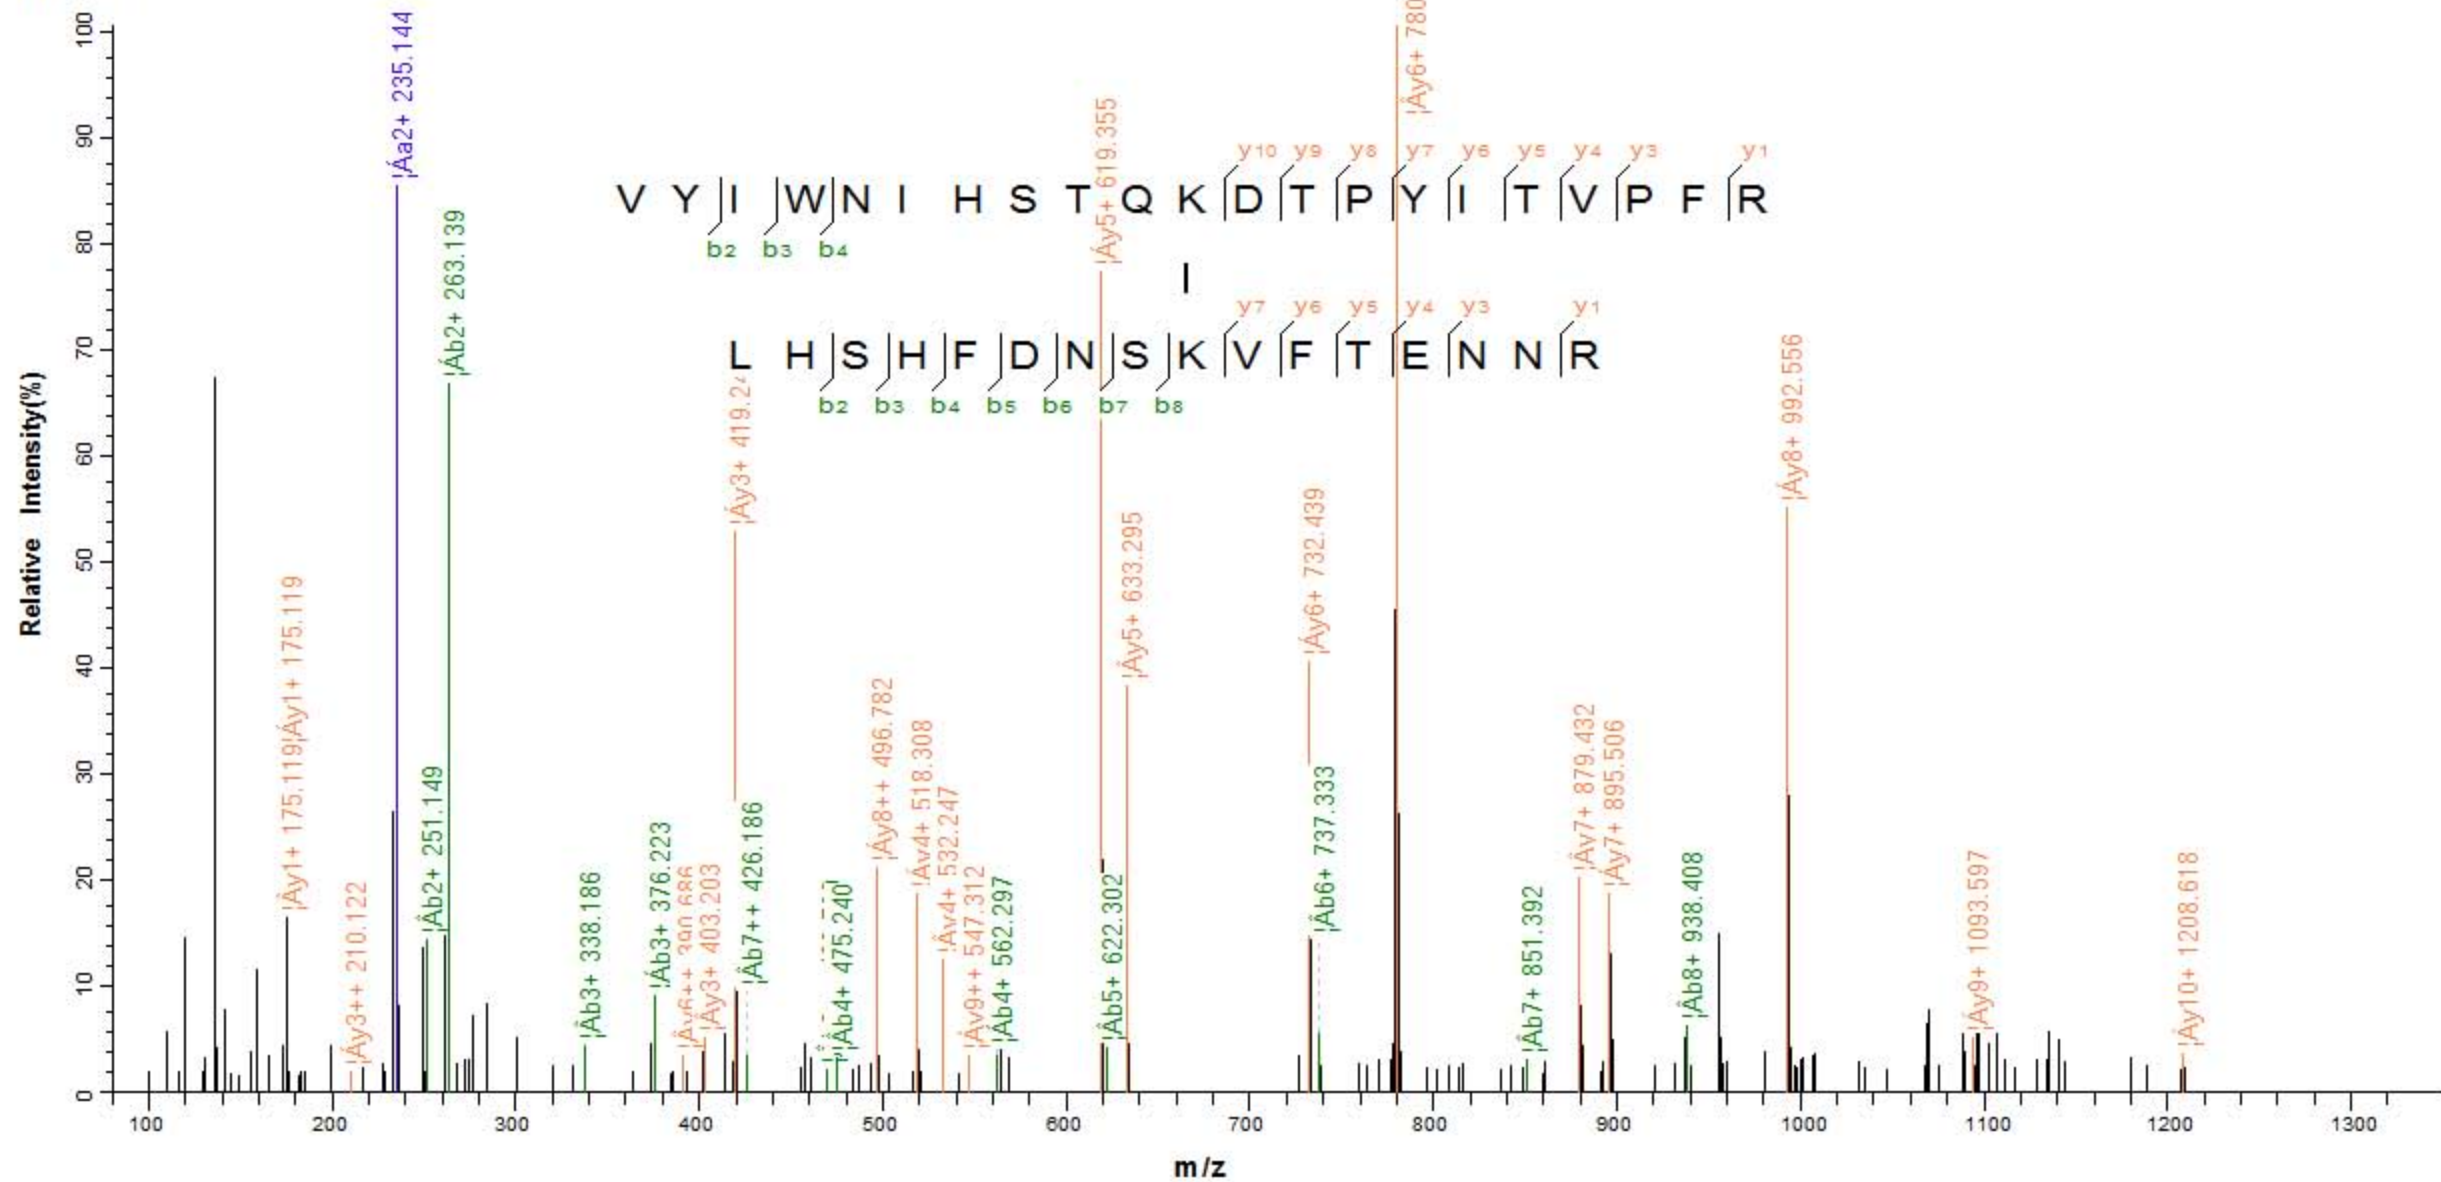

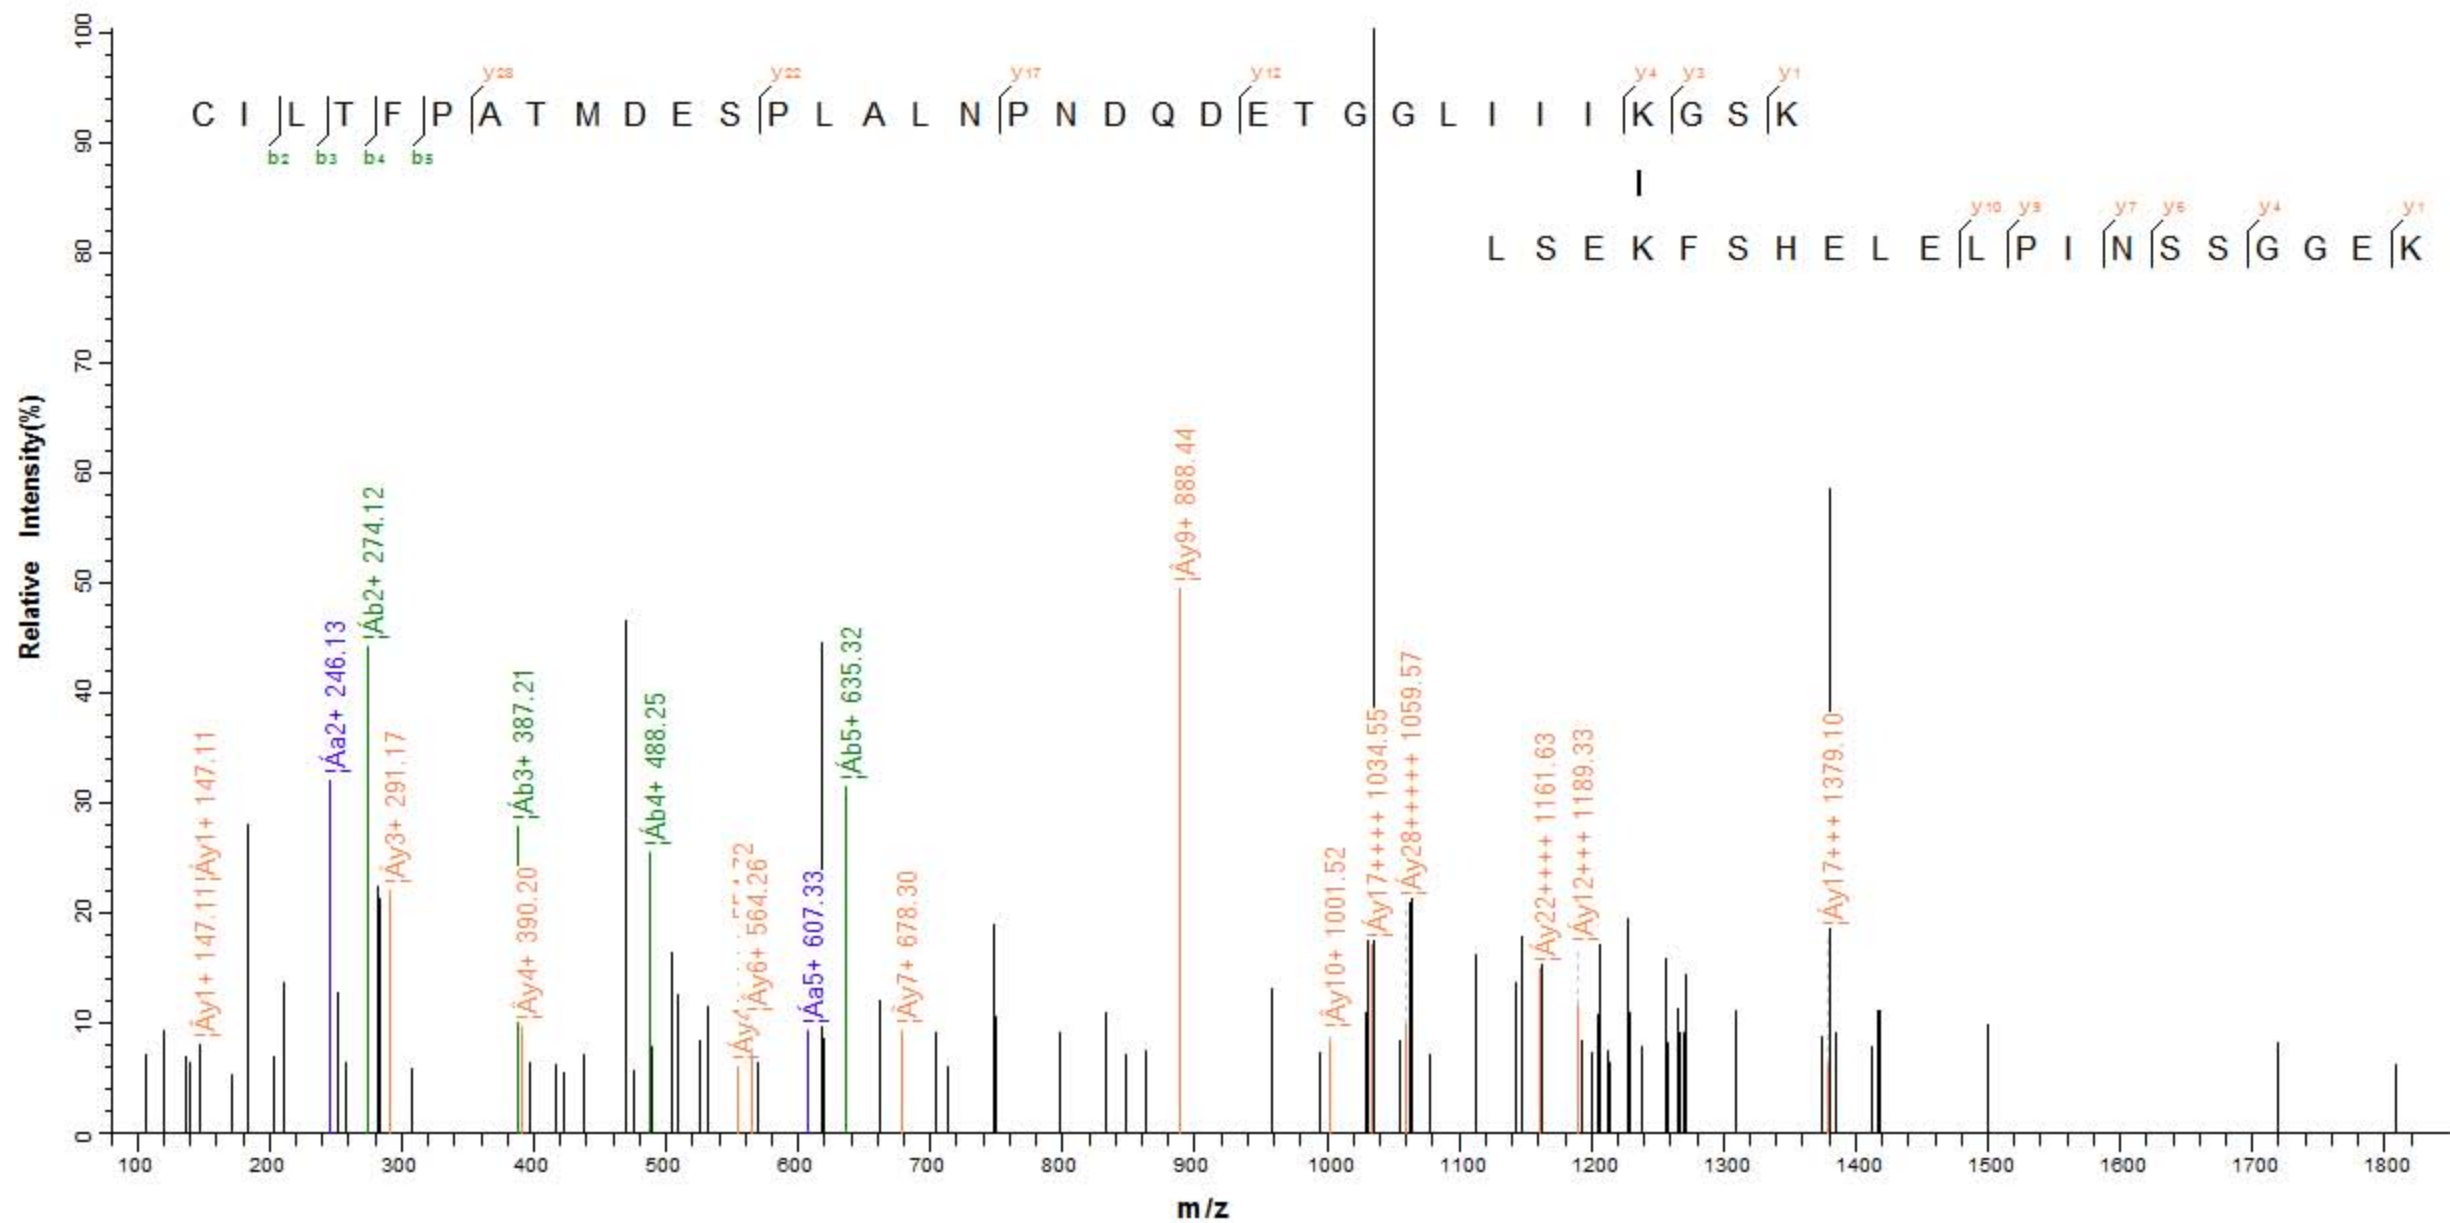

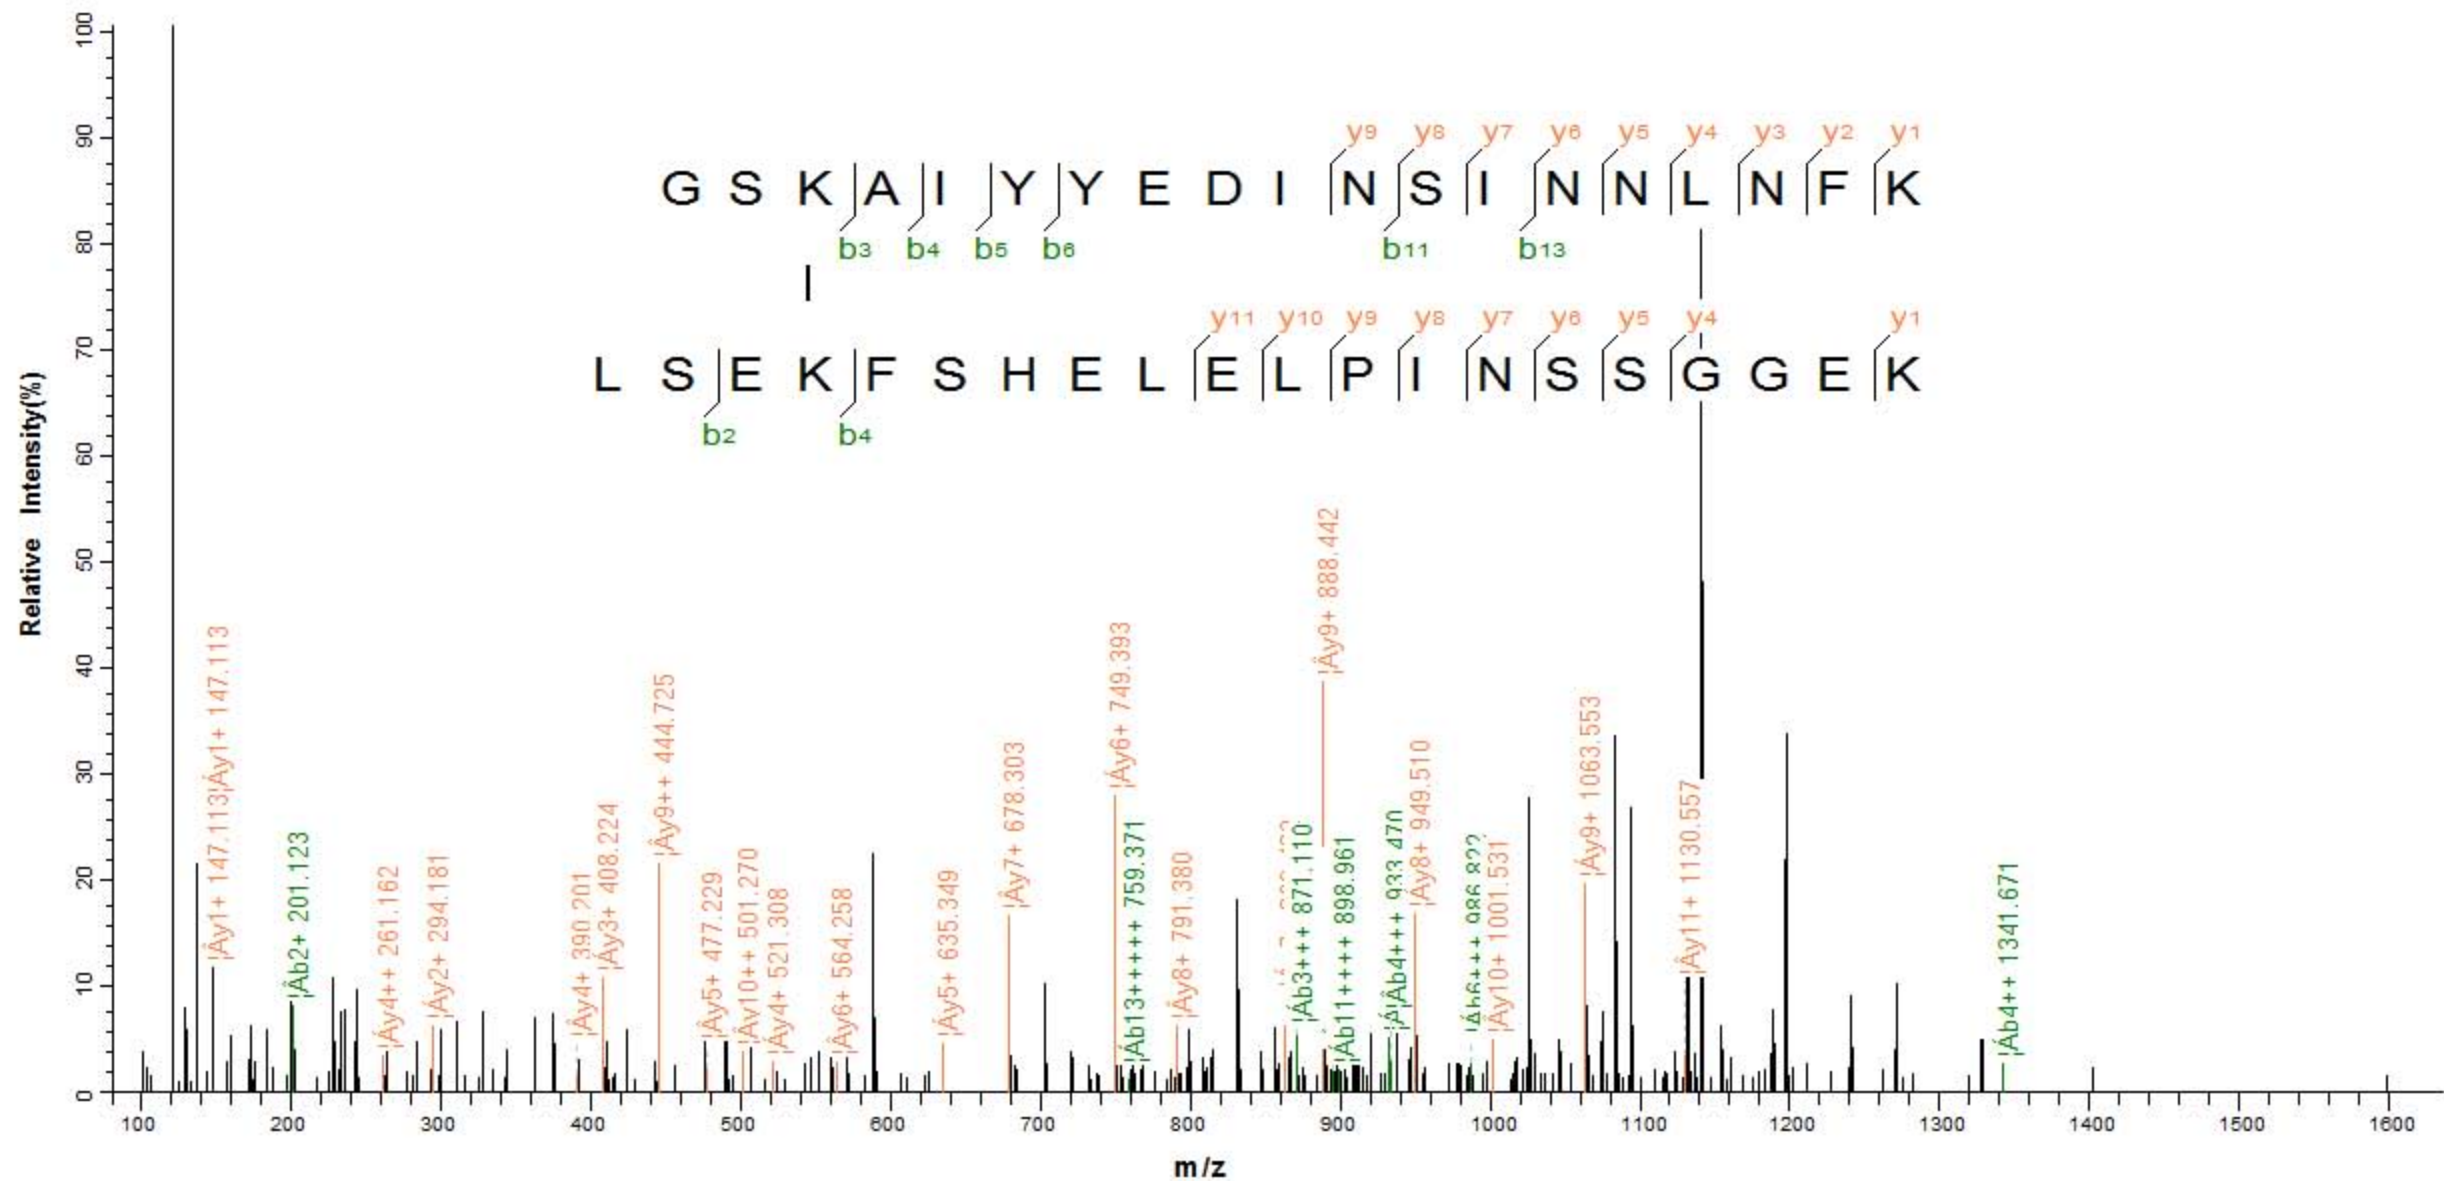

1.3e+004

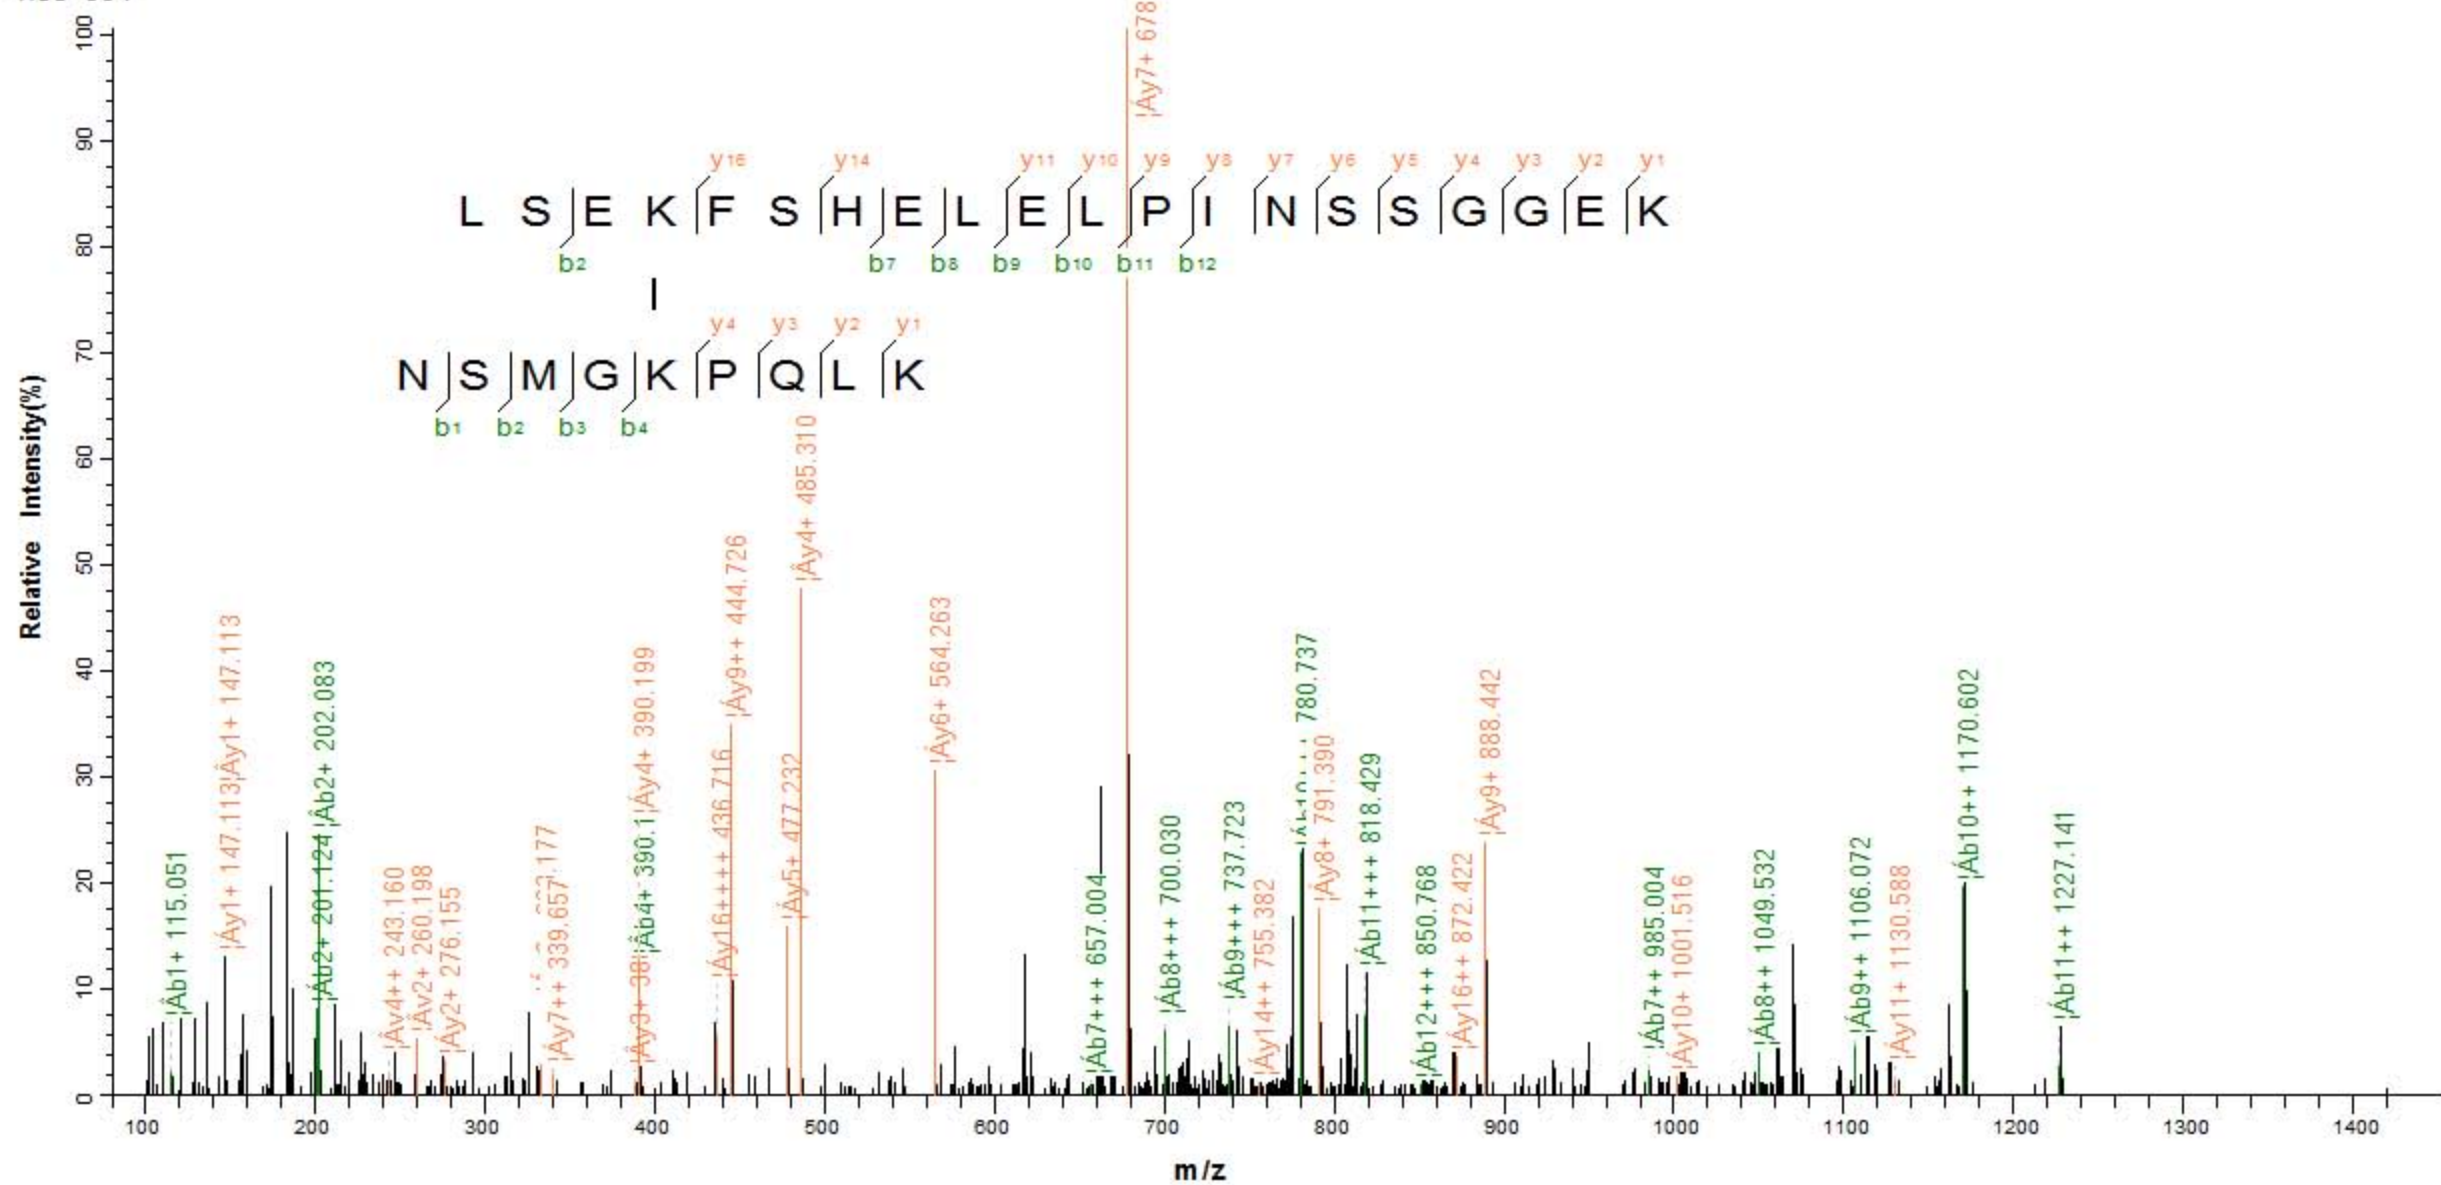



1.1e+004

Relative Intensity(%)

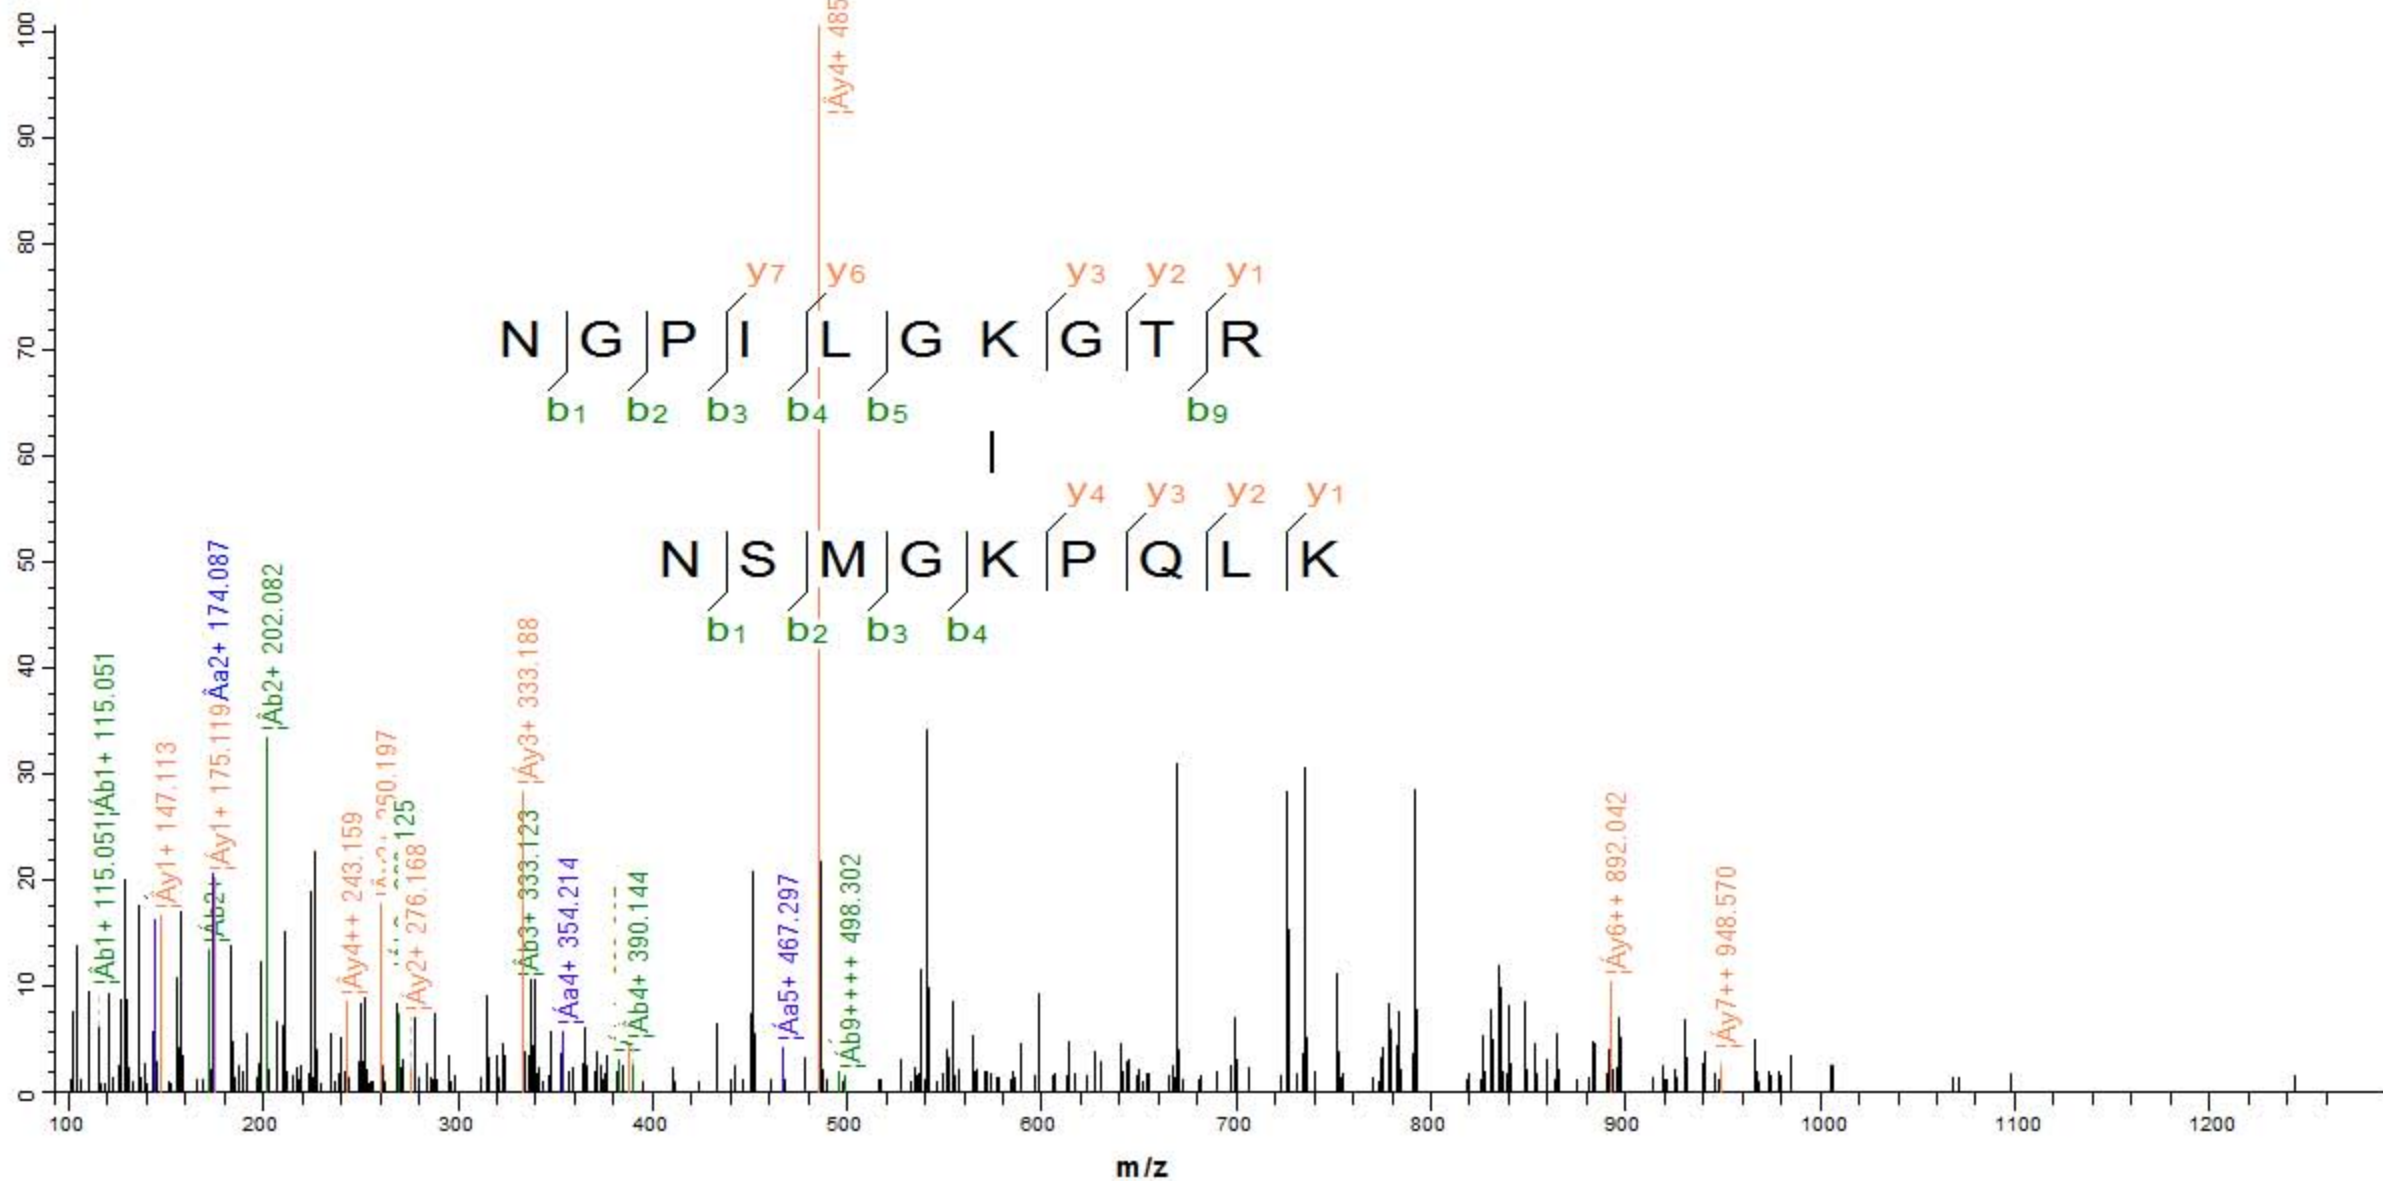

7.3e+004

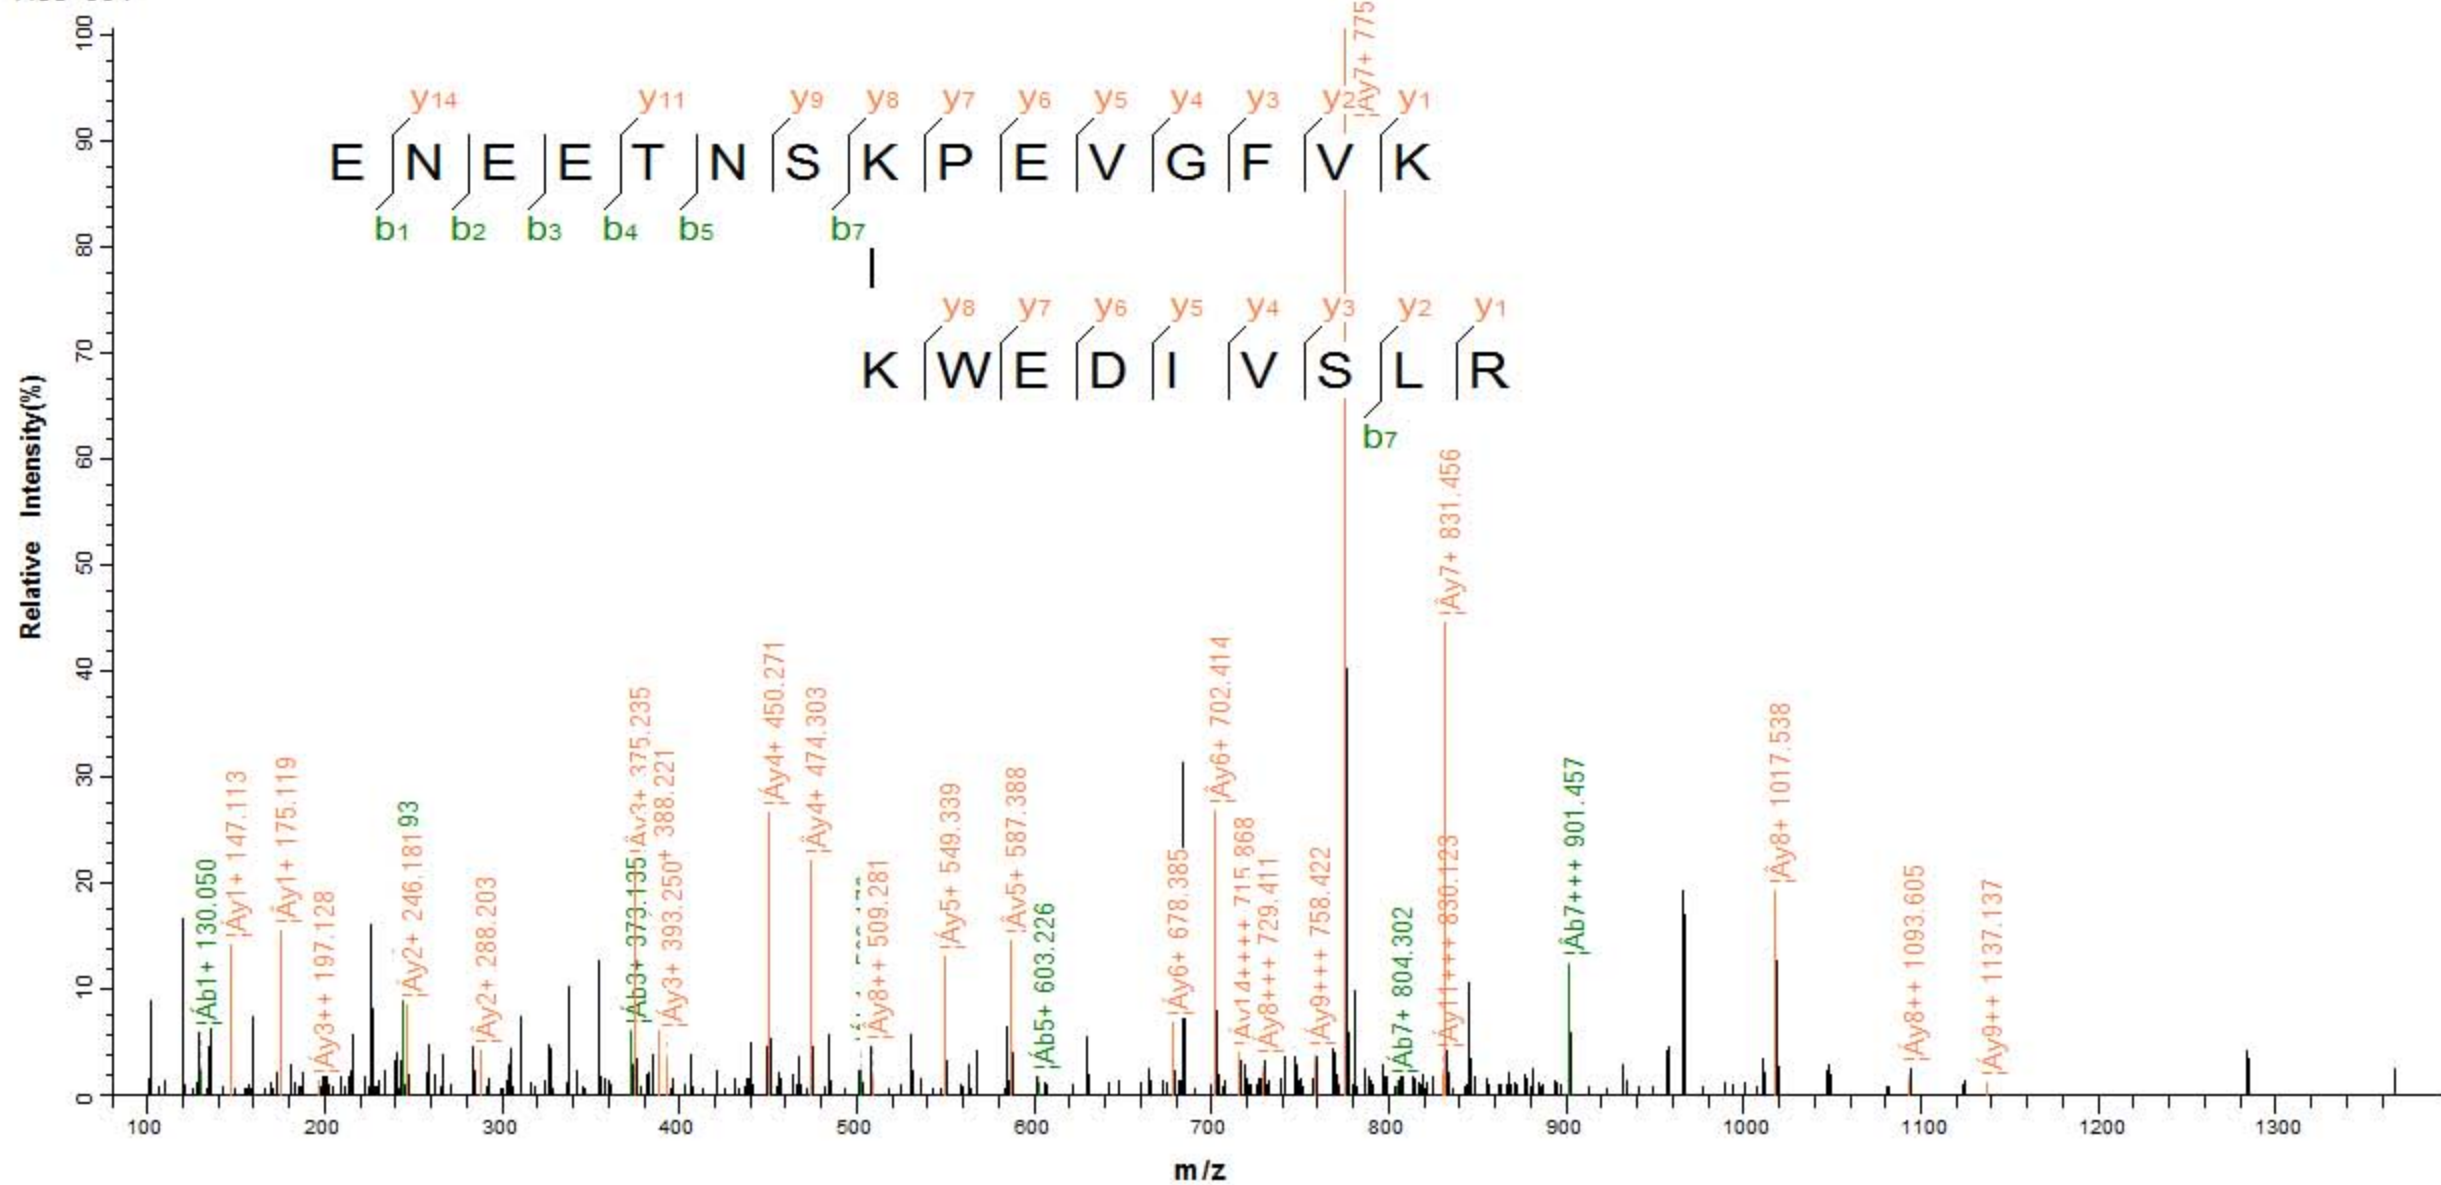

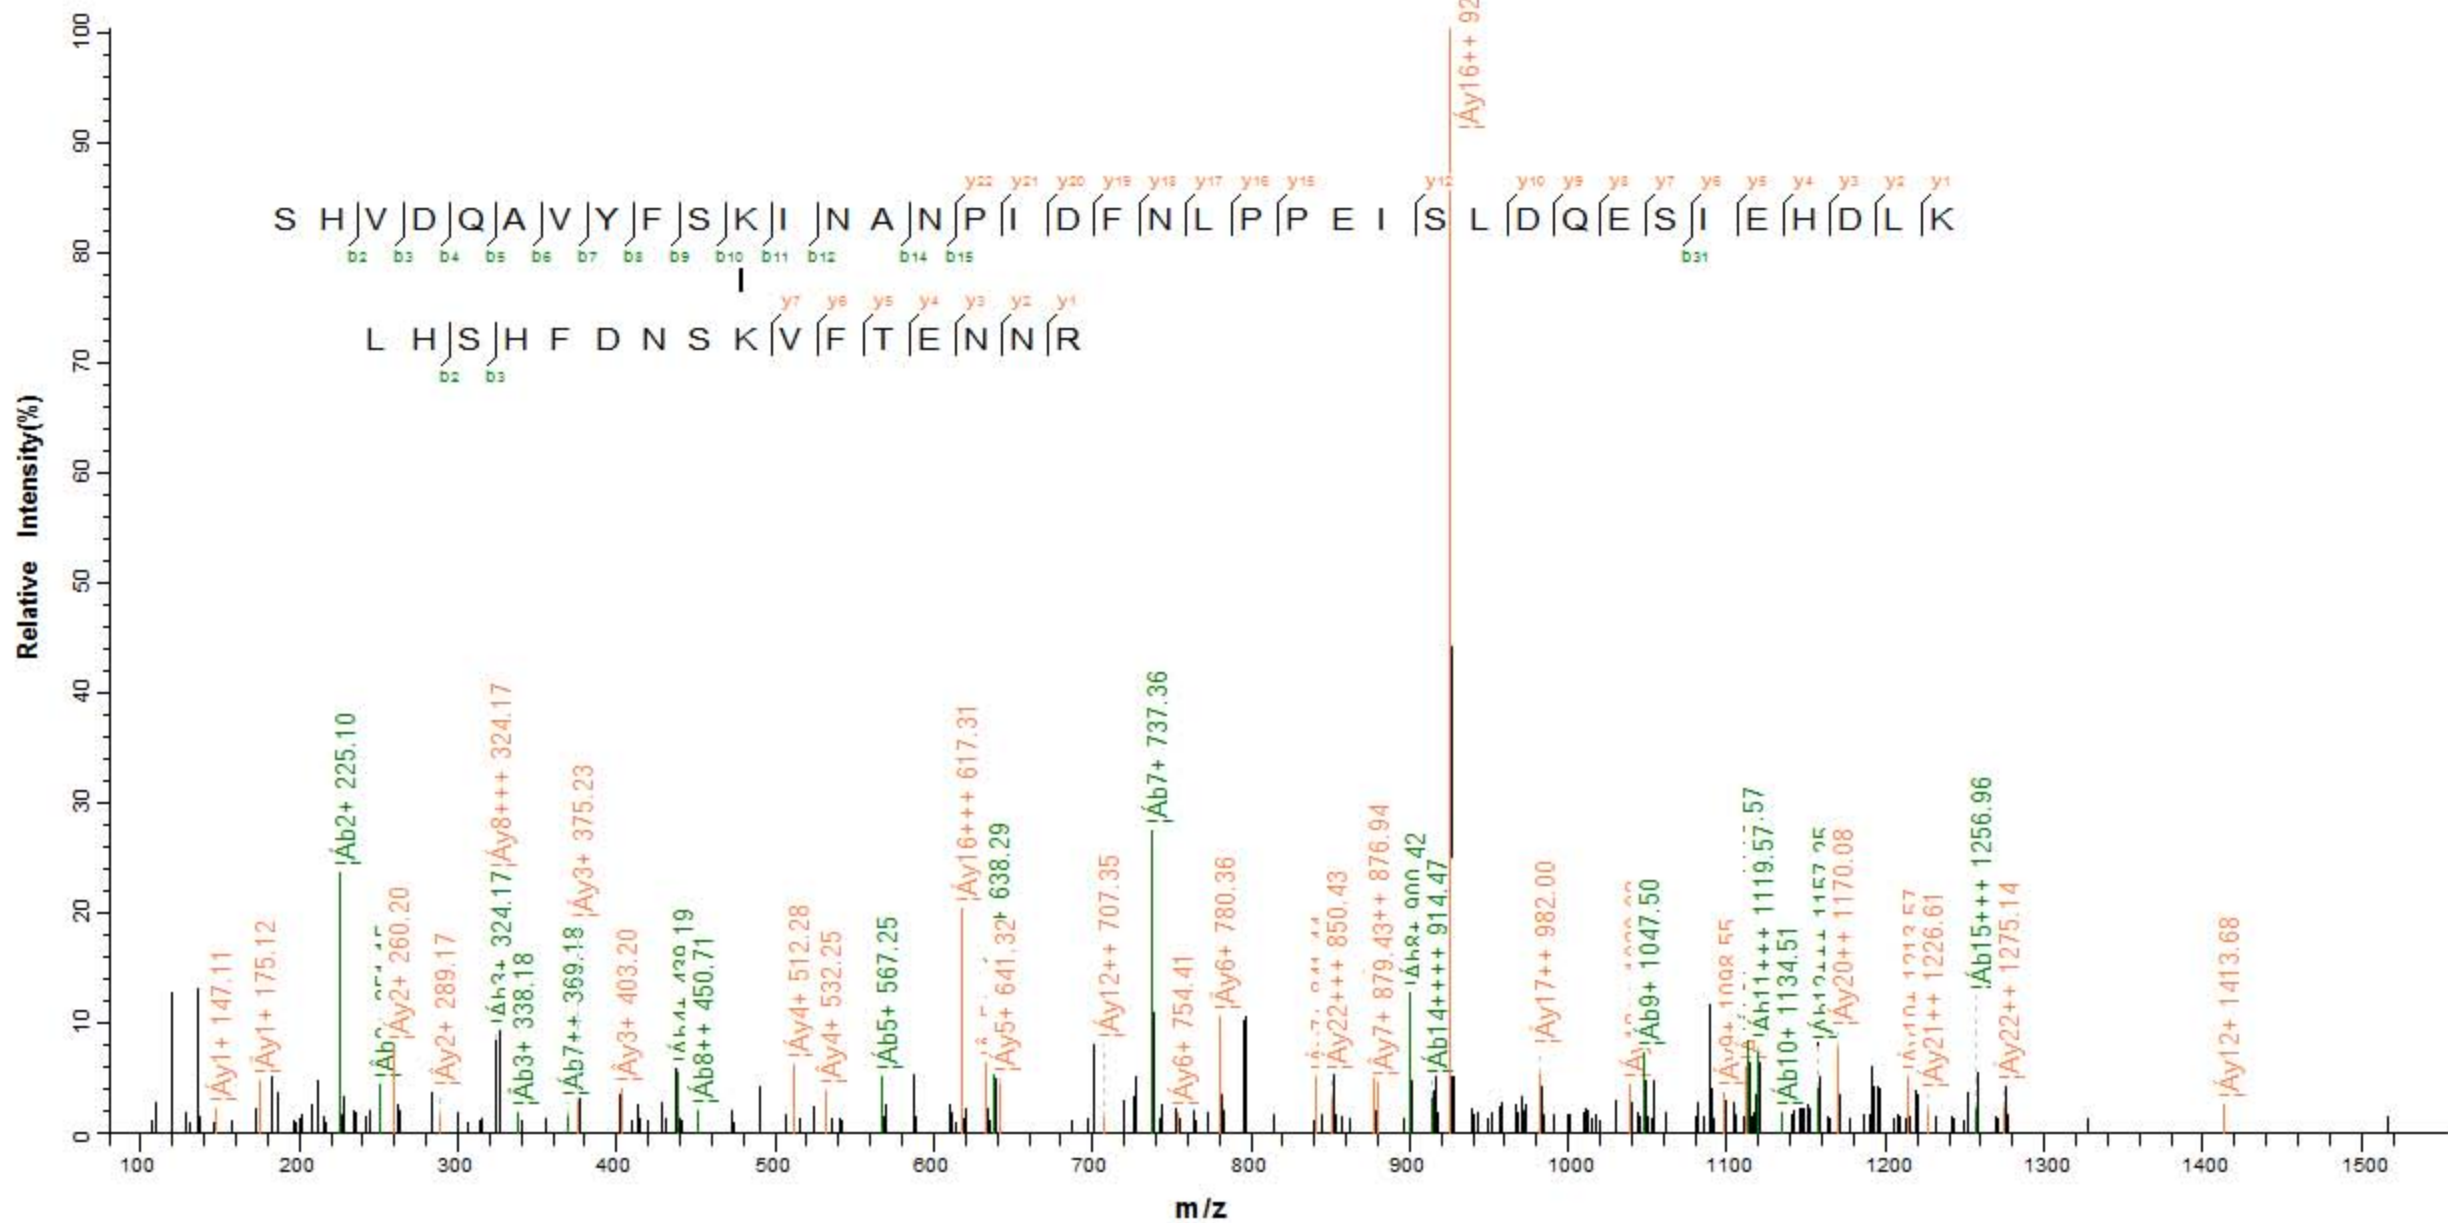

1.25e-008LPPEISLDQESI EHD LKLTSEEI FHSNGK-ENEETNSKPEVGFVK

2.5e+003

Relative Intensity(%)

I N A N P I D F N L P P E I S L D Q E S I E H D L K L T S E E I F H S N G K  
D2 D3 D4 D5 D6 D7 D8 D9 D10 D22 y11 y10 y9 y8 y7 y6 y5 y4 y3 y2 y1

E N E E T N S K P E V G F V K  
D2 D3 D4 D5 D7 y7 y6 y5 y4 y3 y2 y1

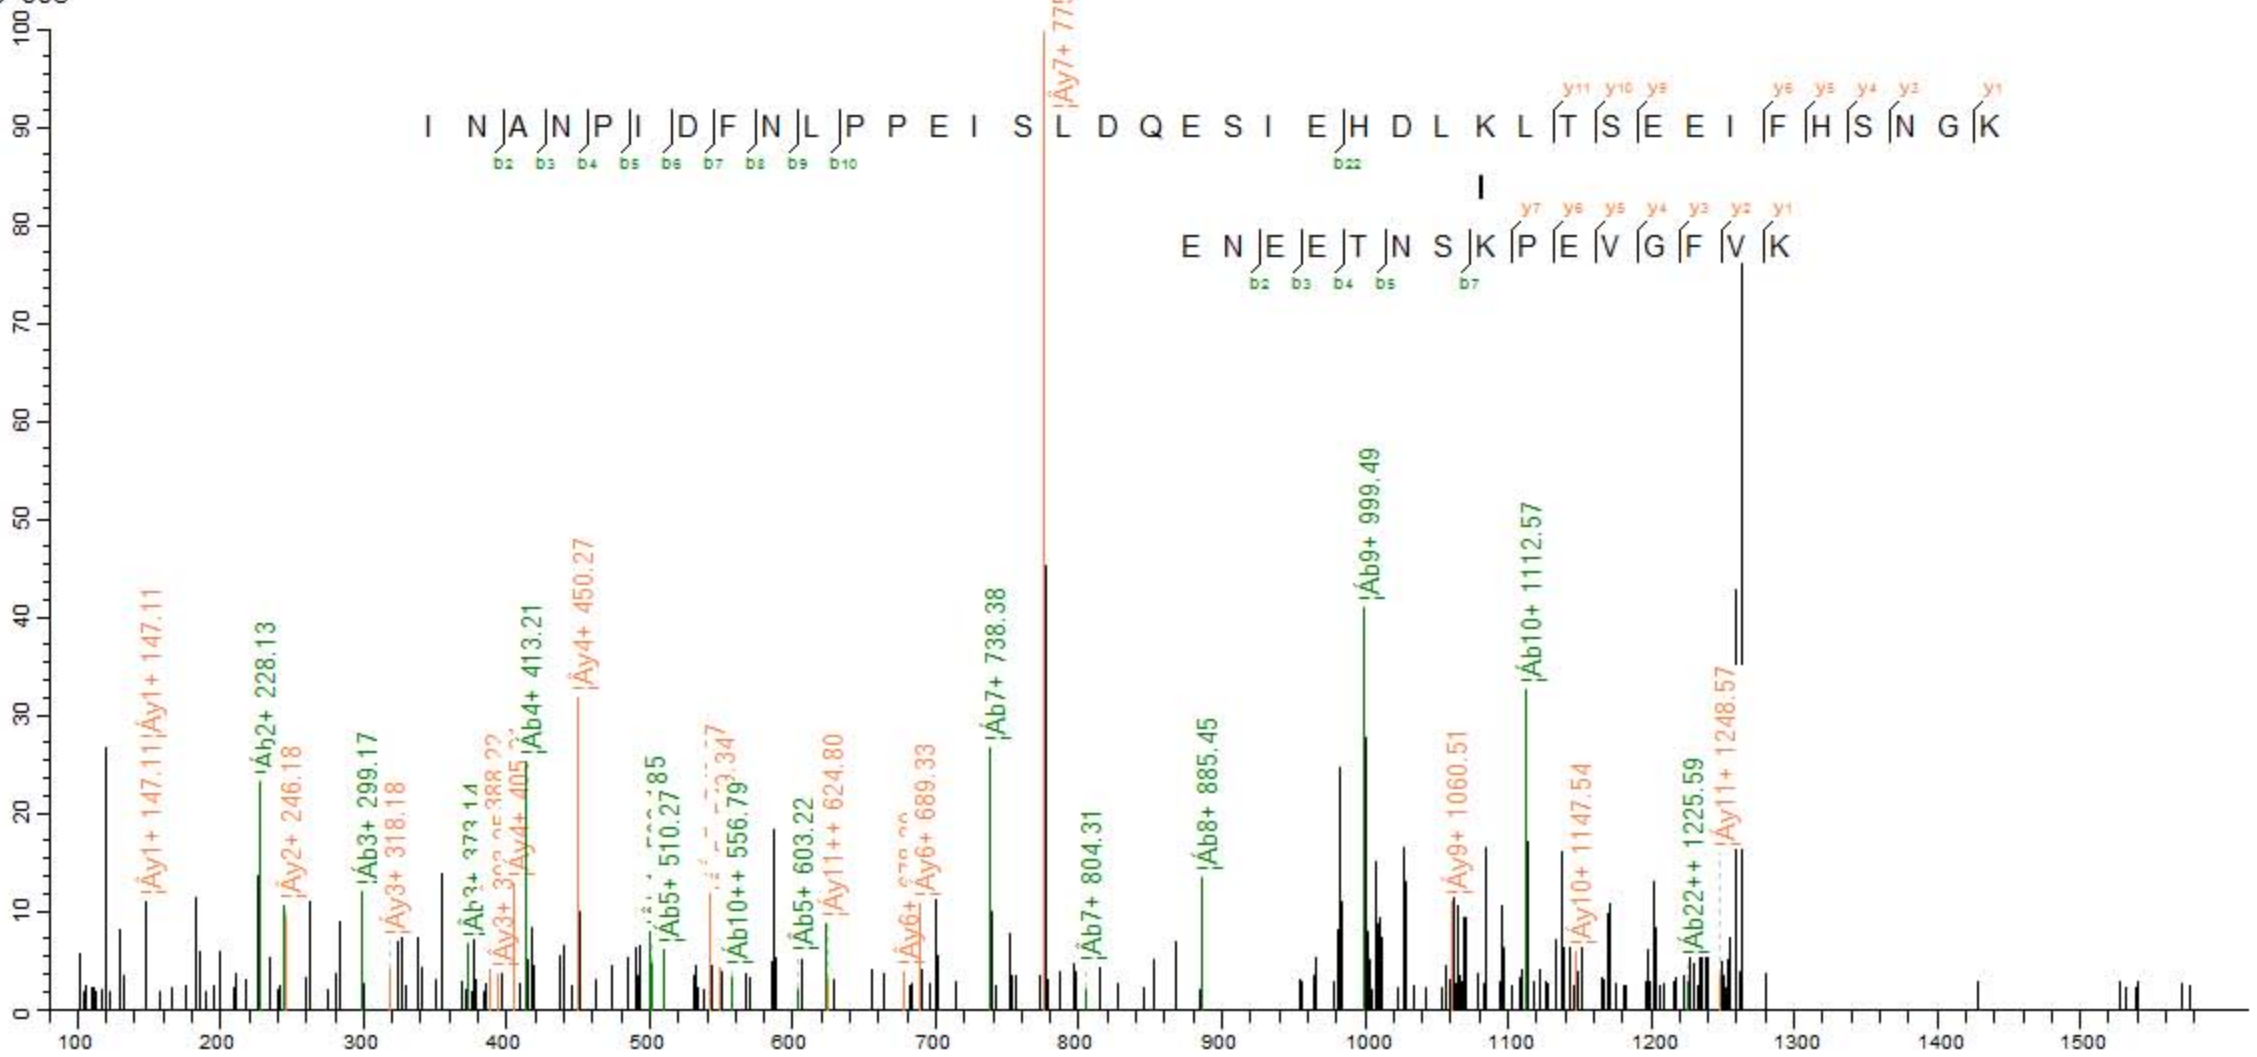

m/z

3.5e+004

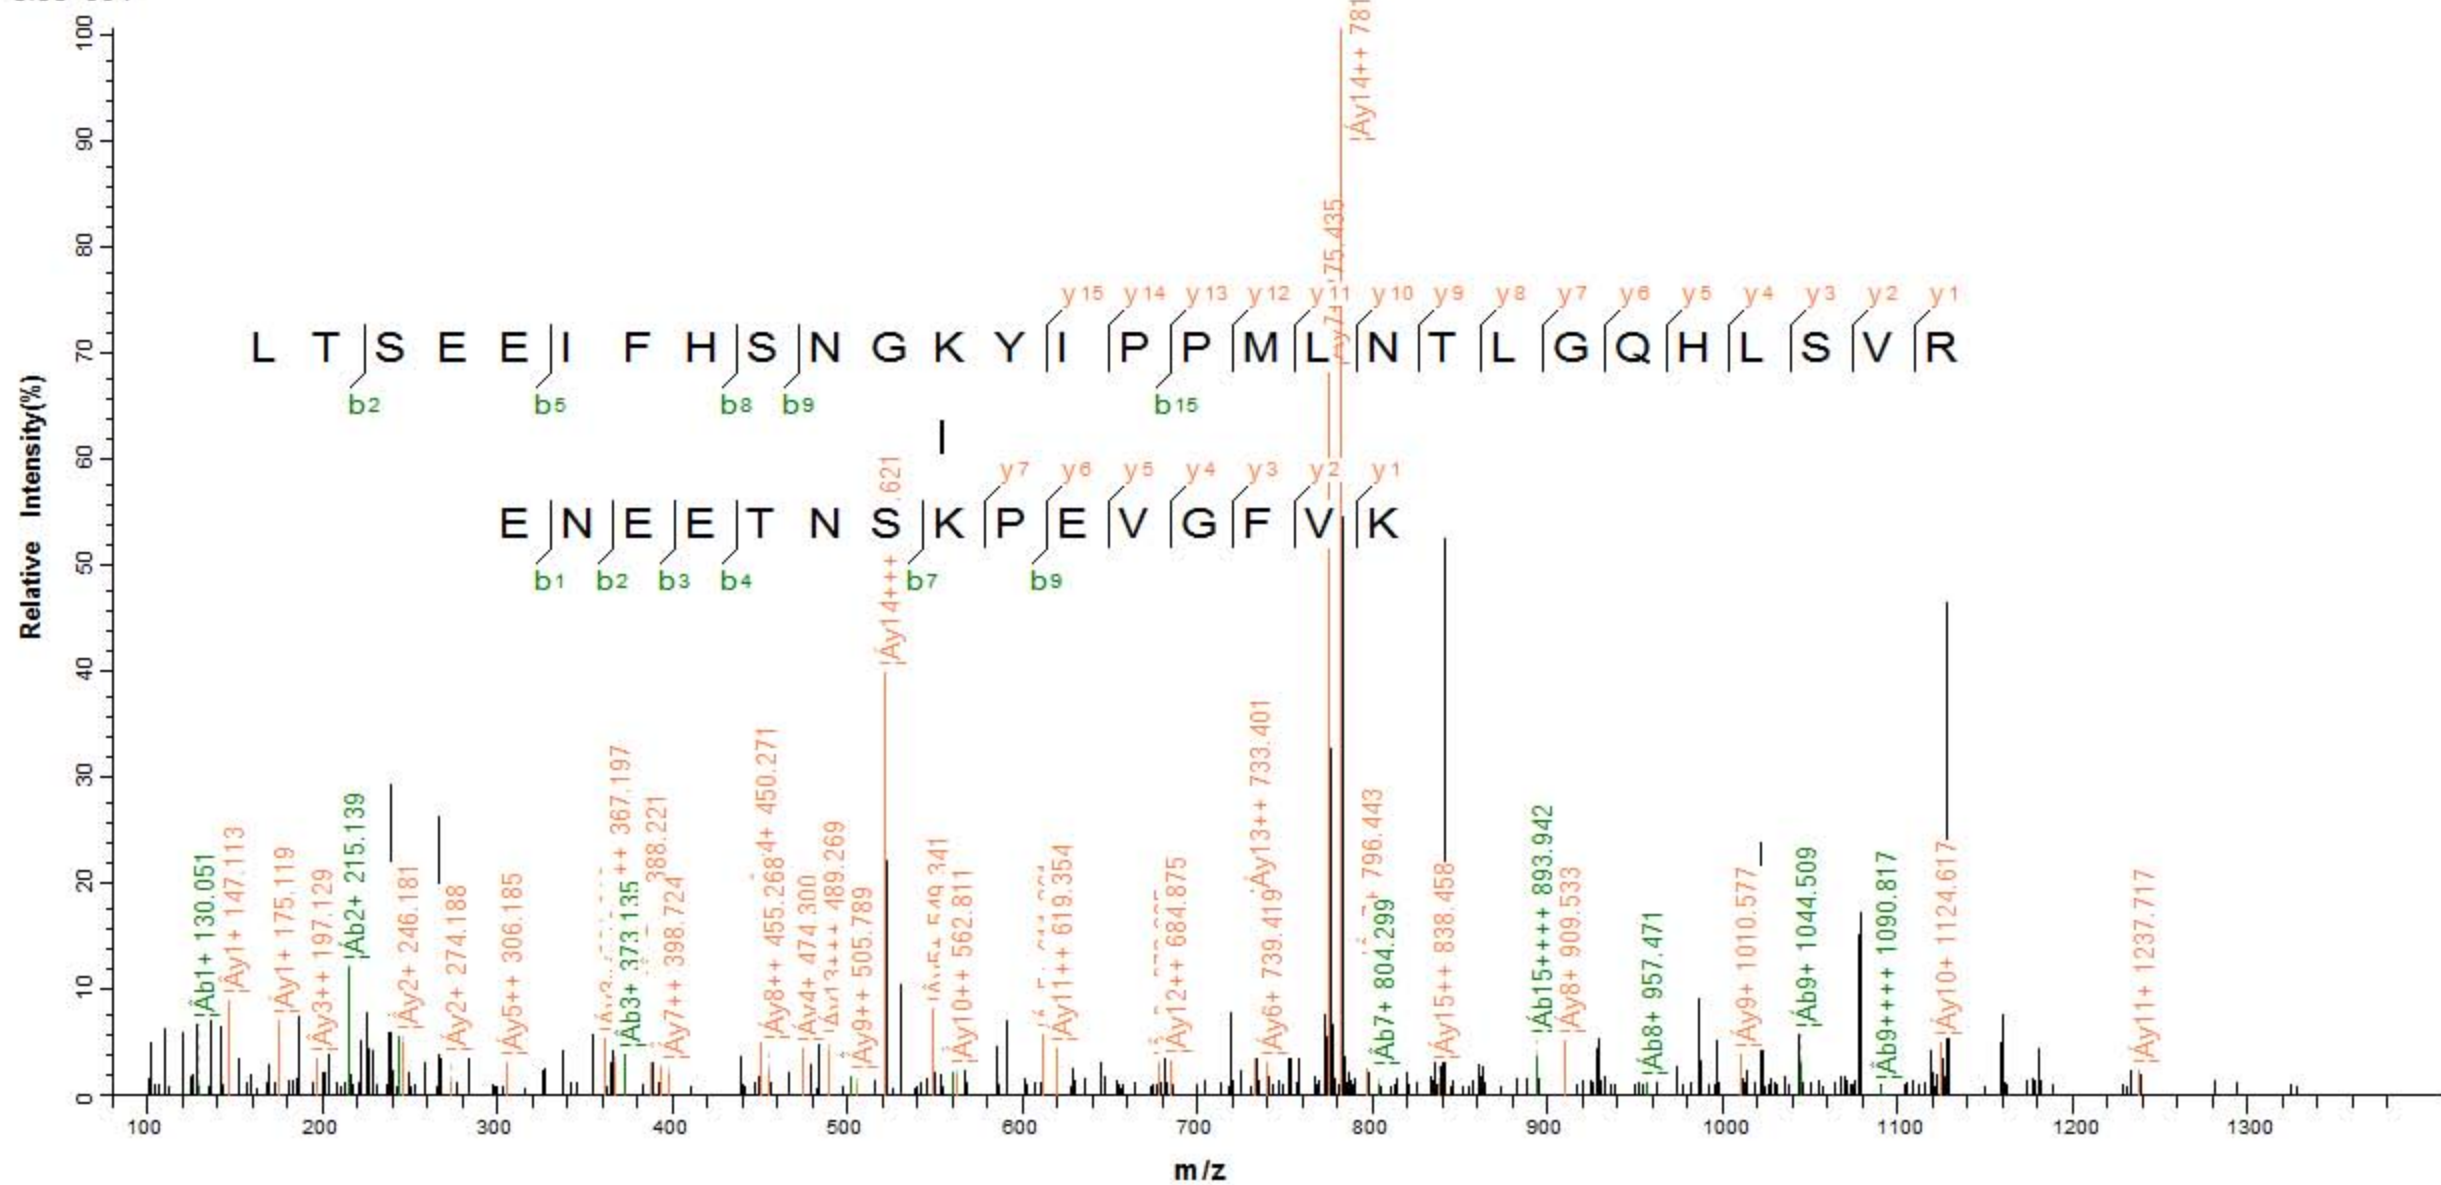

6.8e+003

Relative Intensity(%)

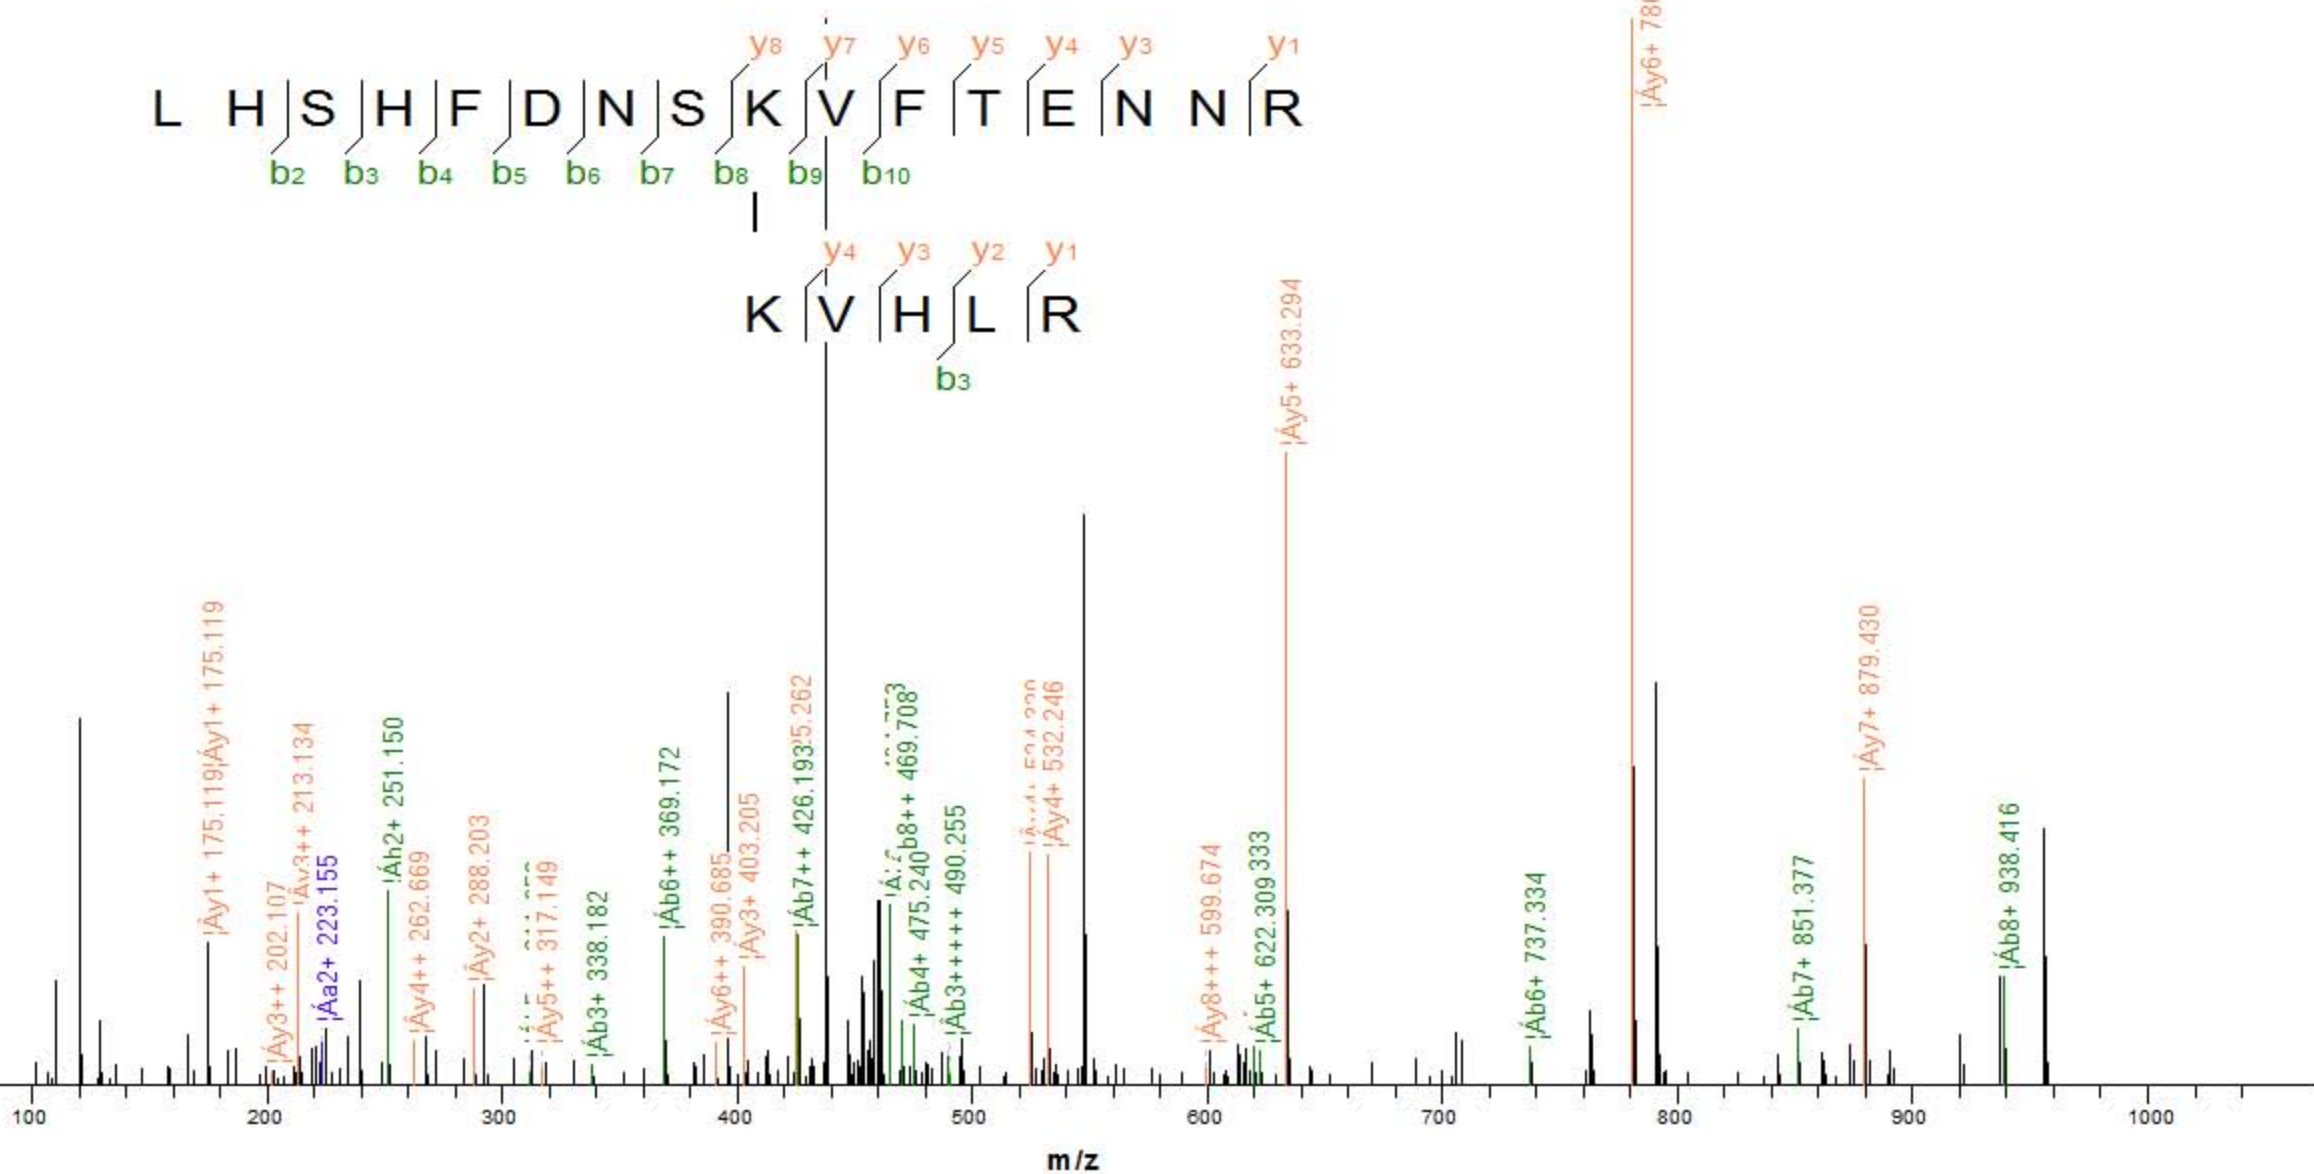

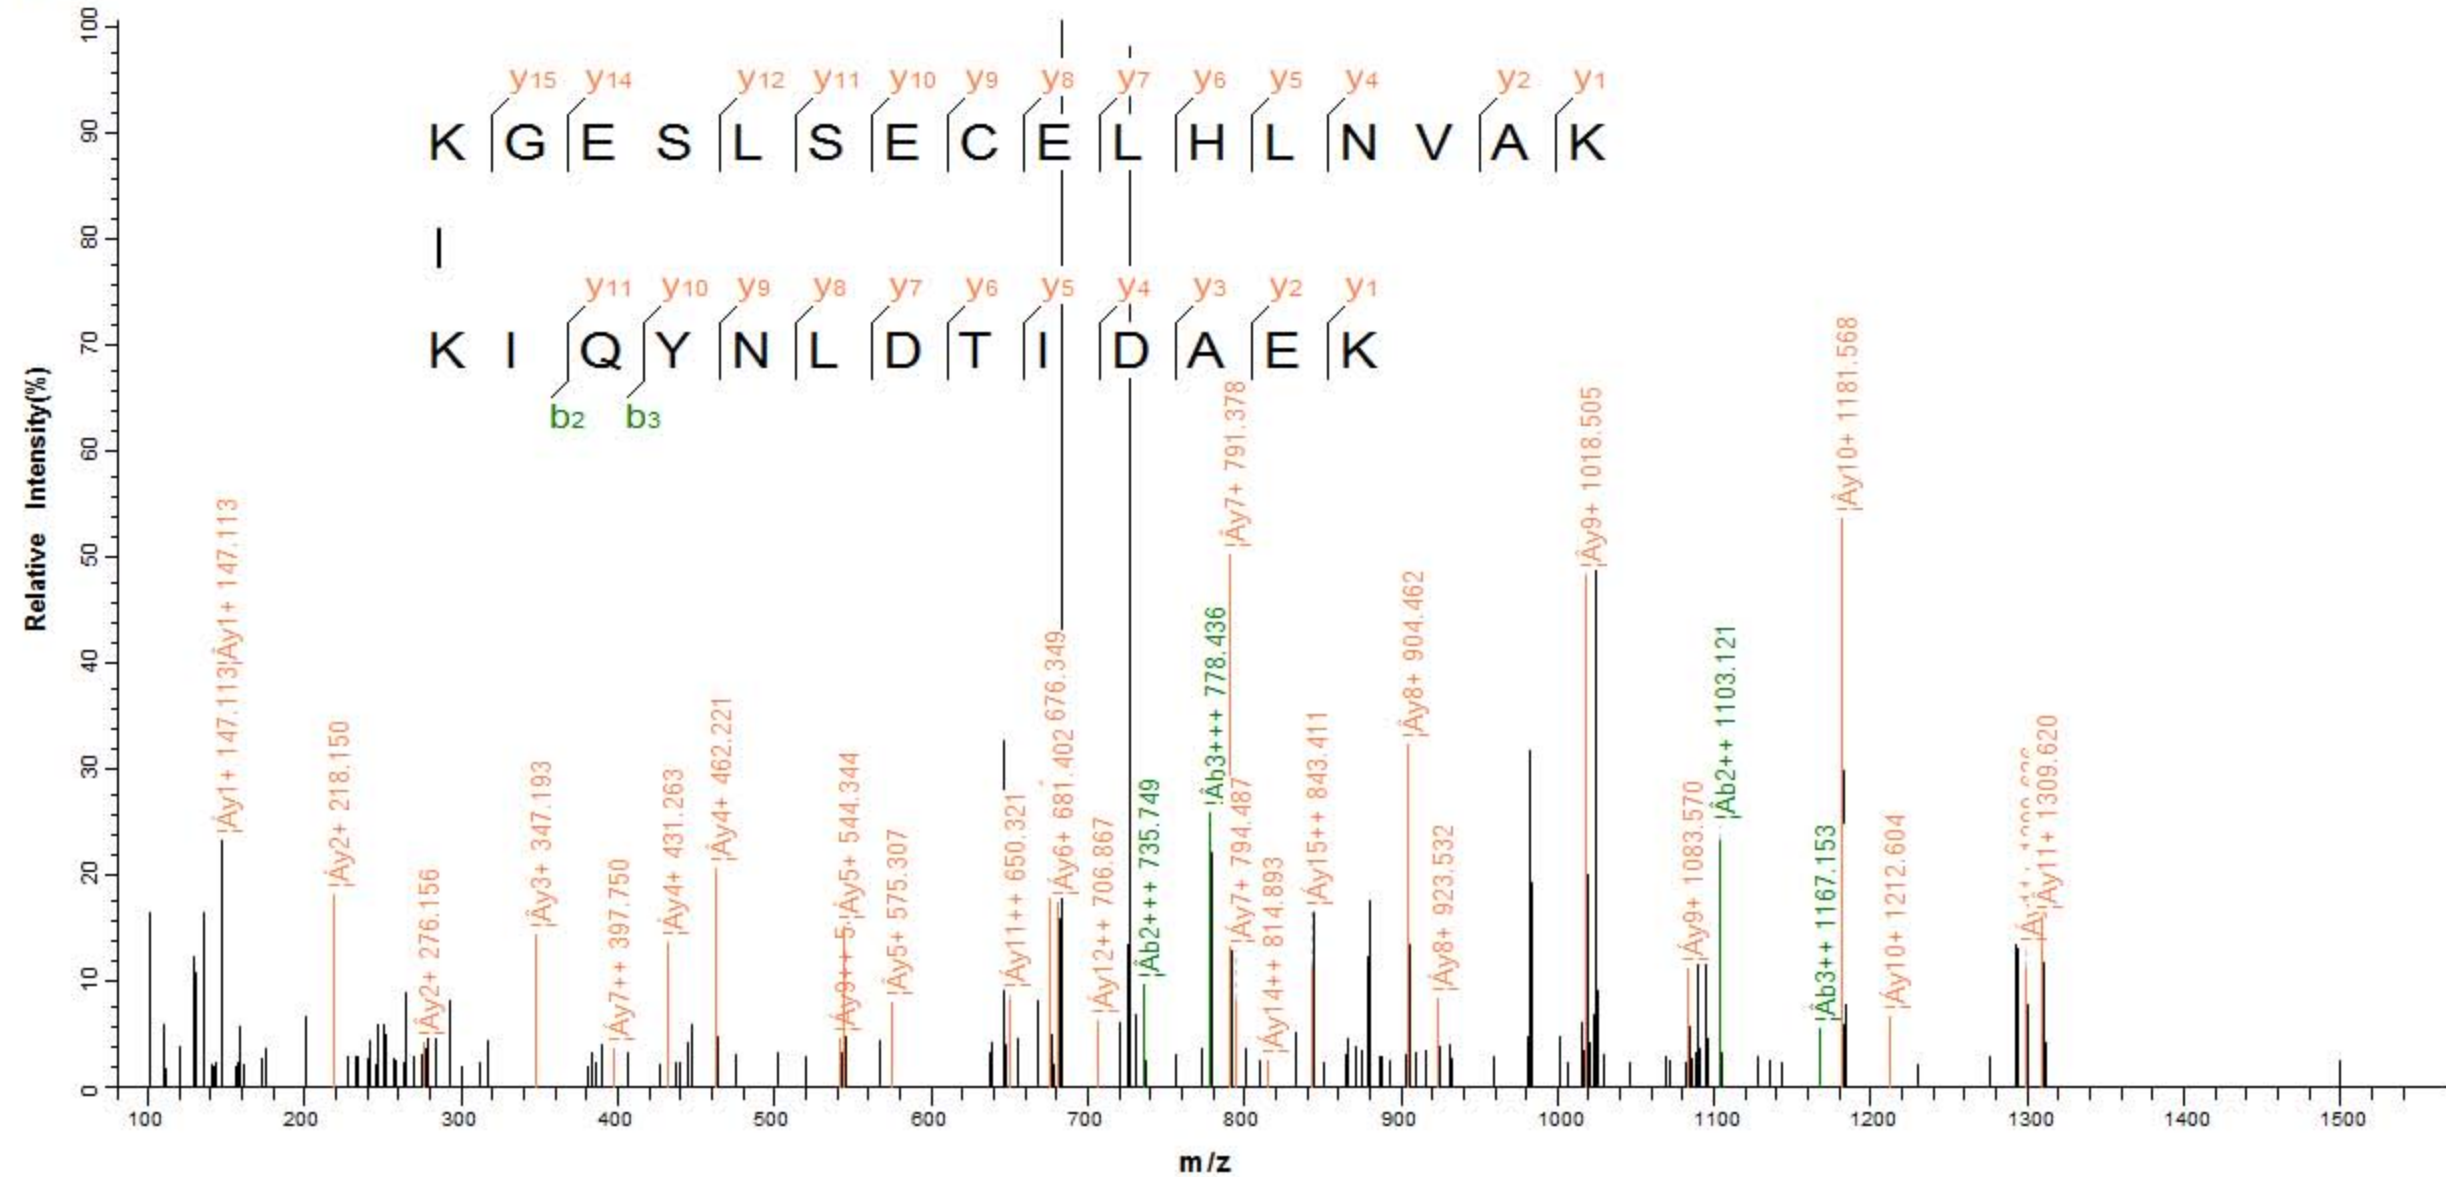

1.6e+004

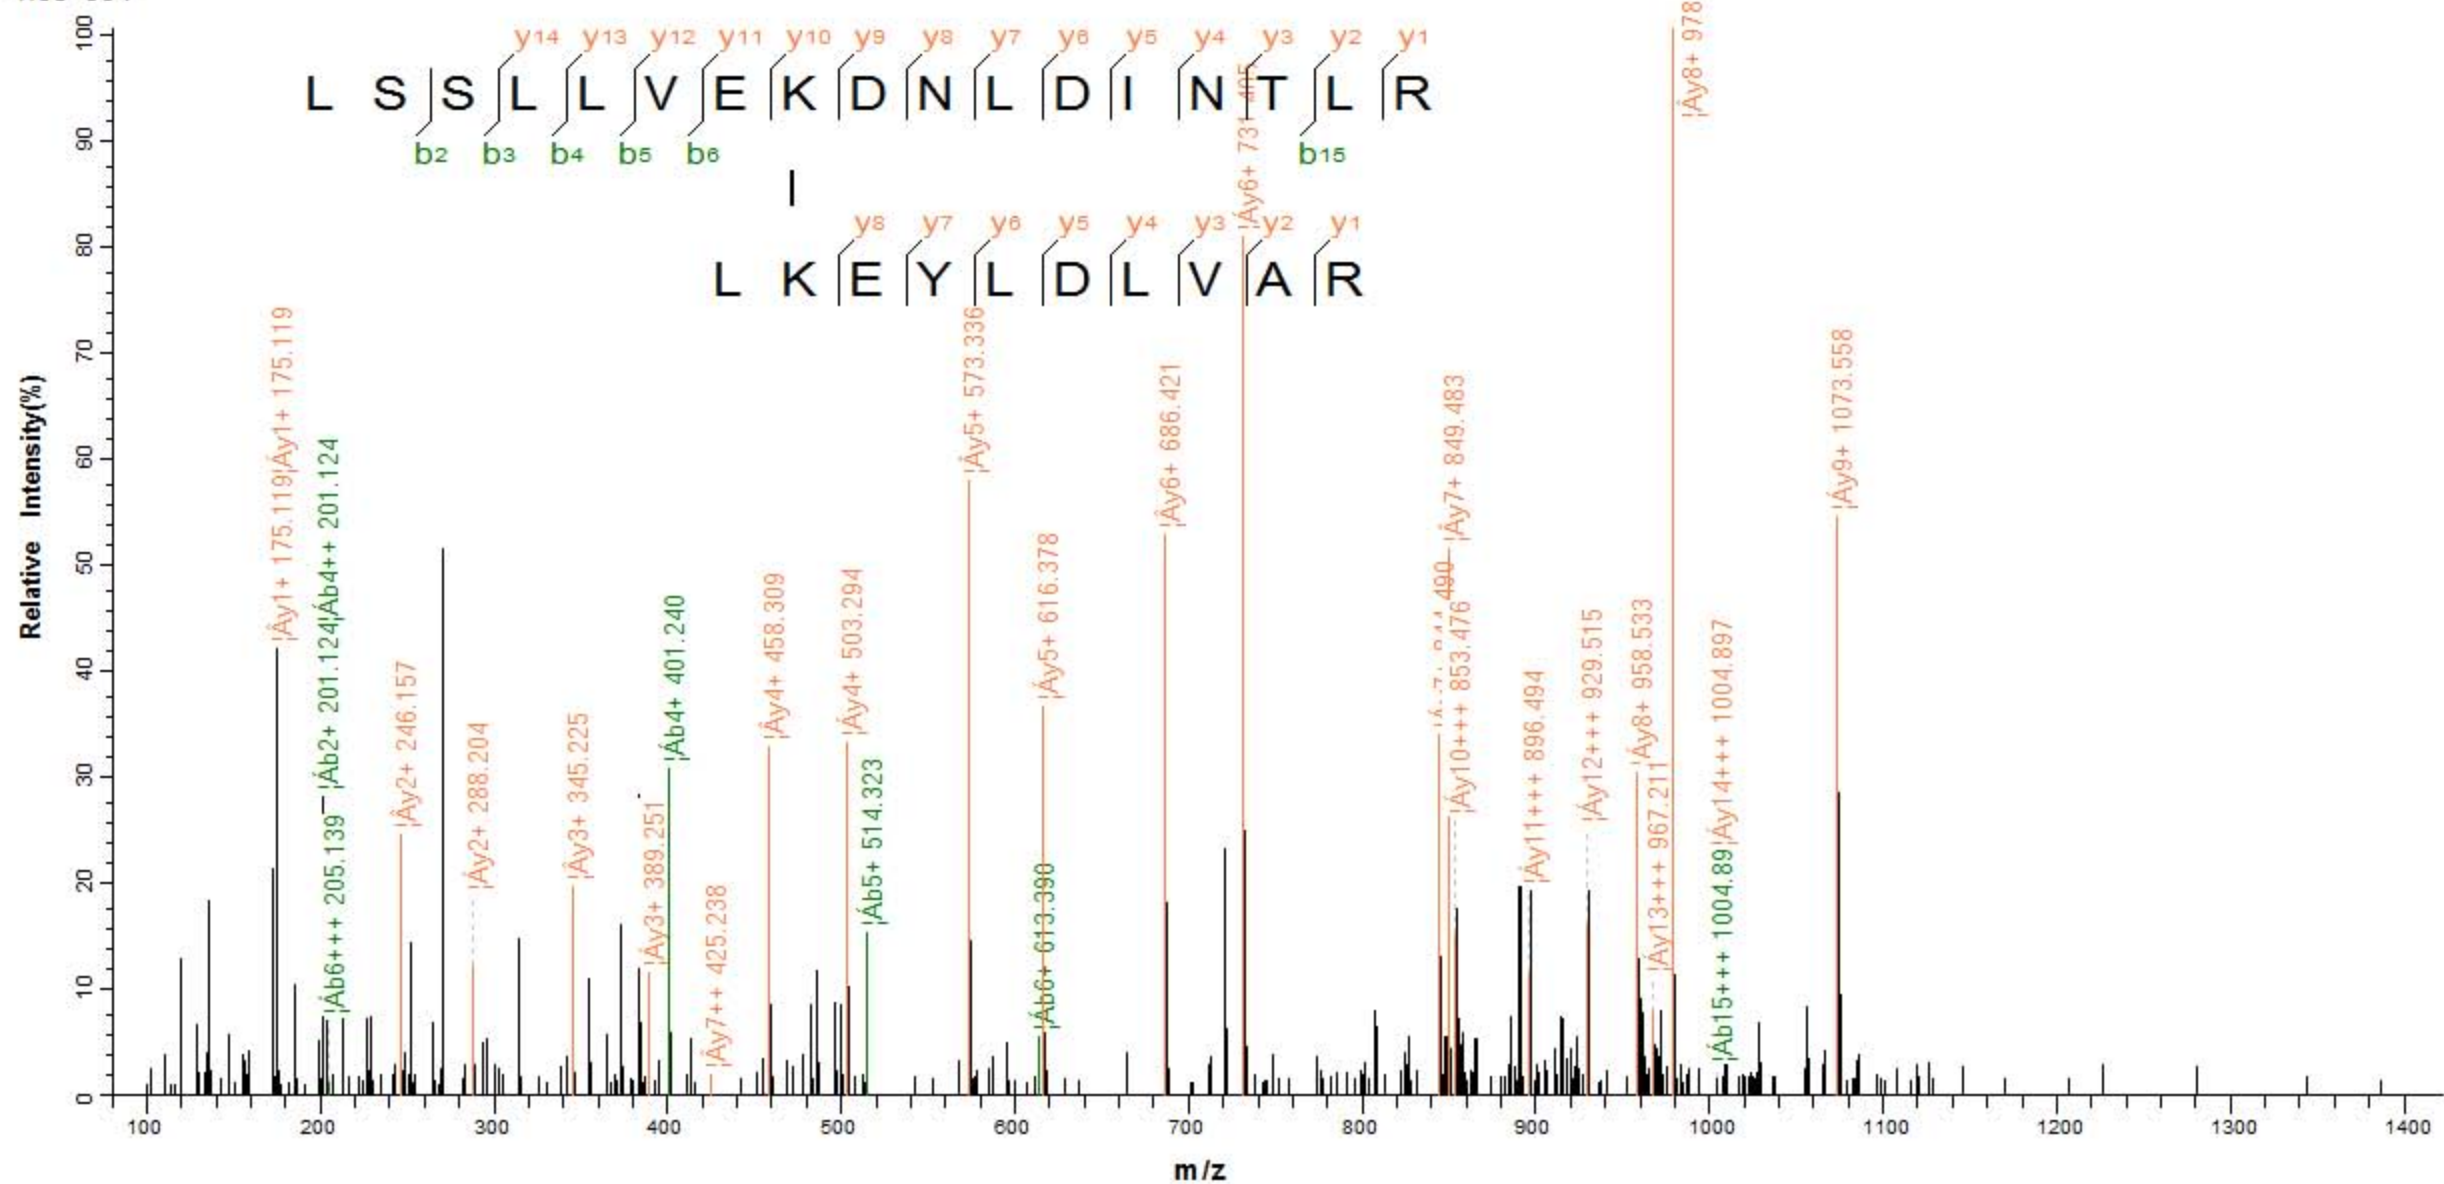



7.5e+004

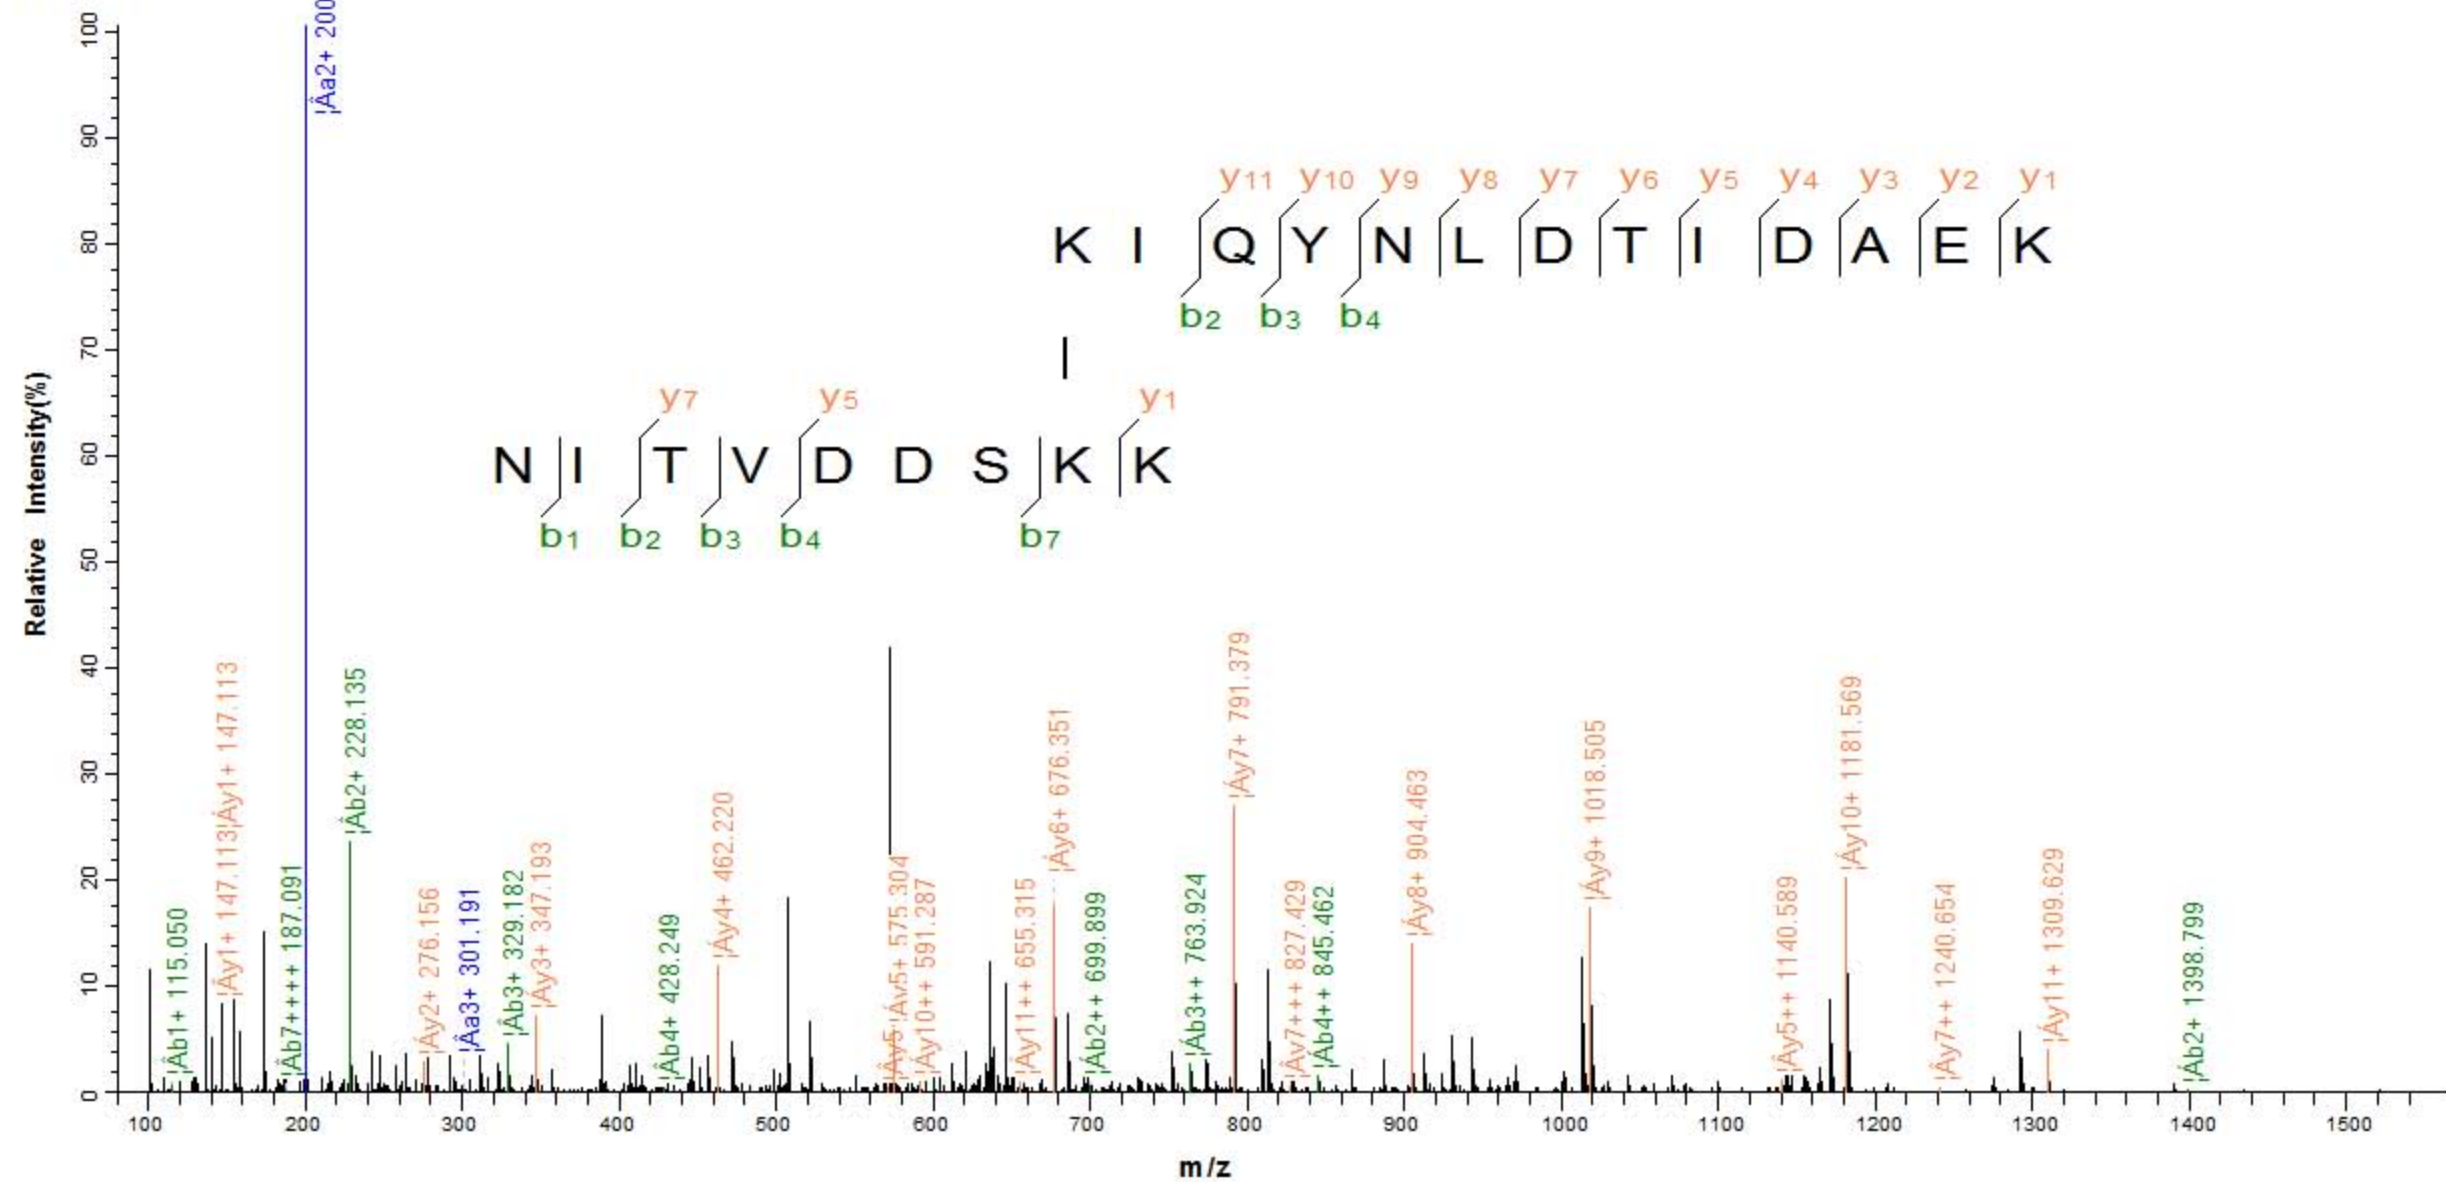

4.3e+003

Relative Intensity(%)

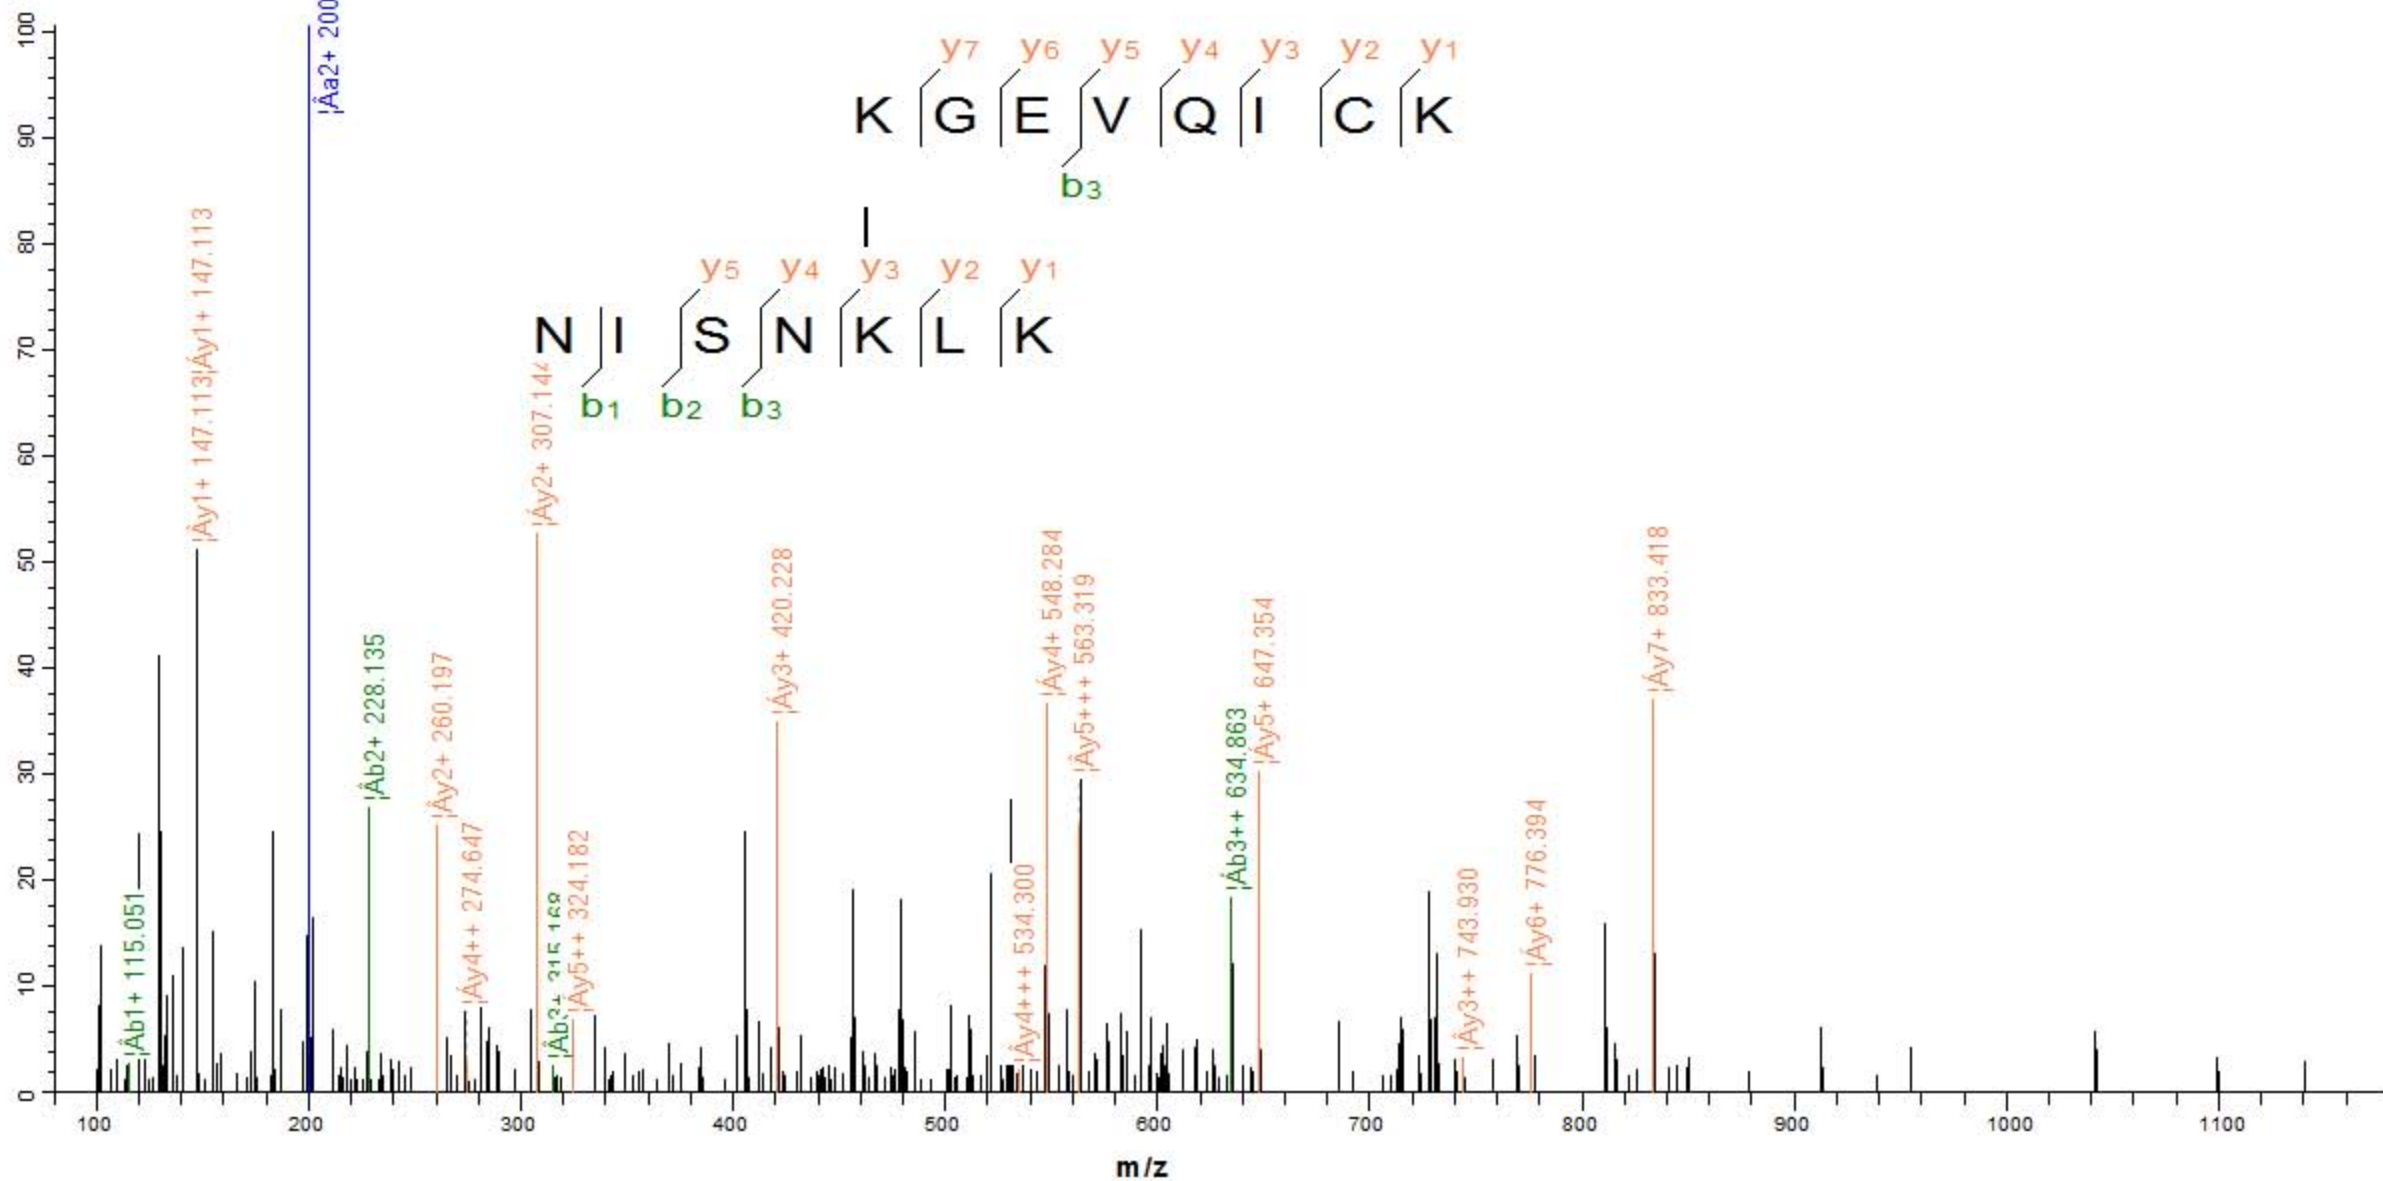

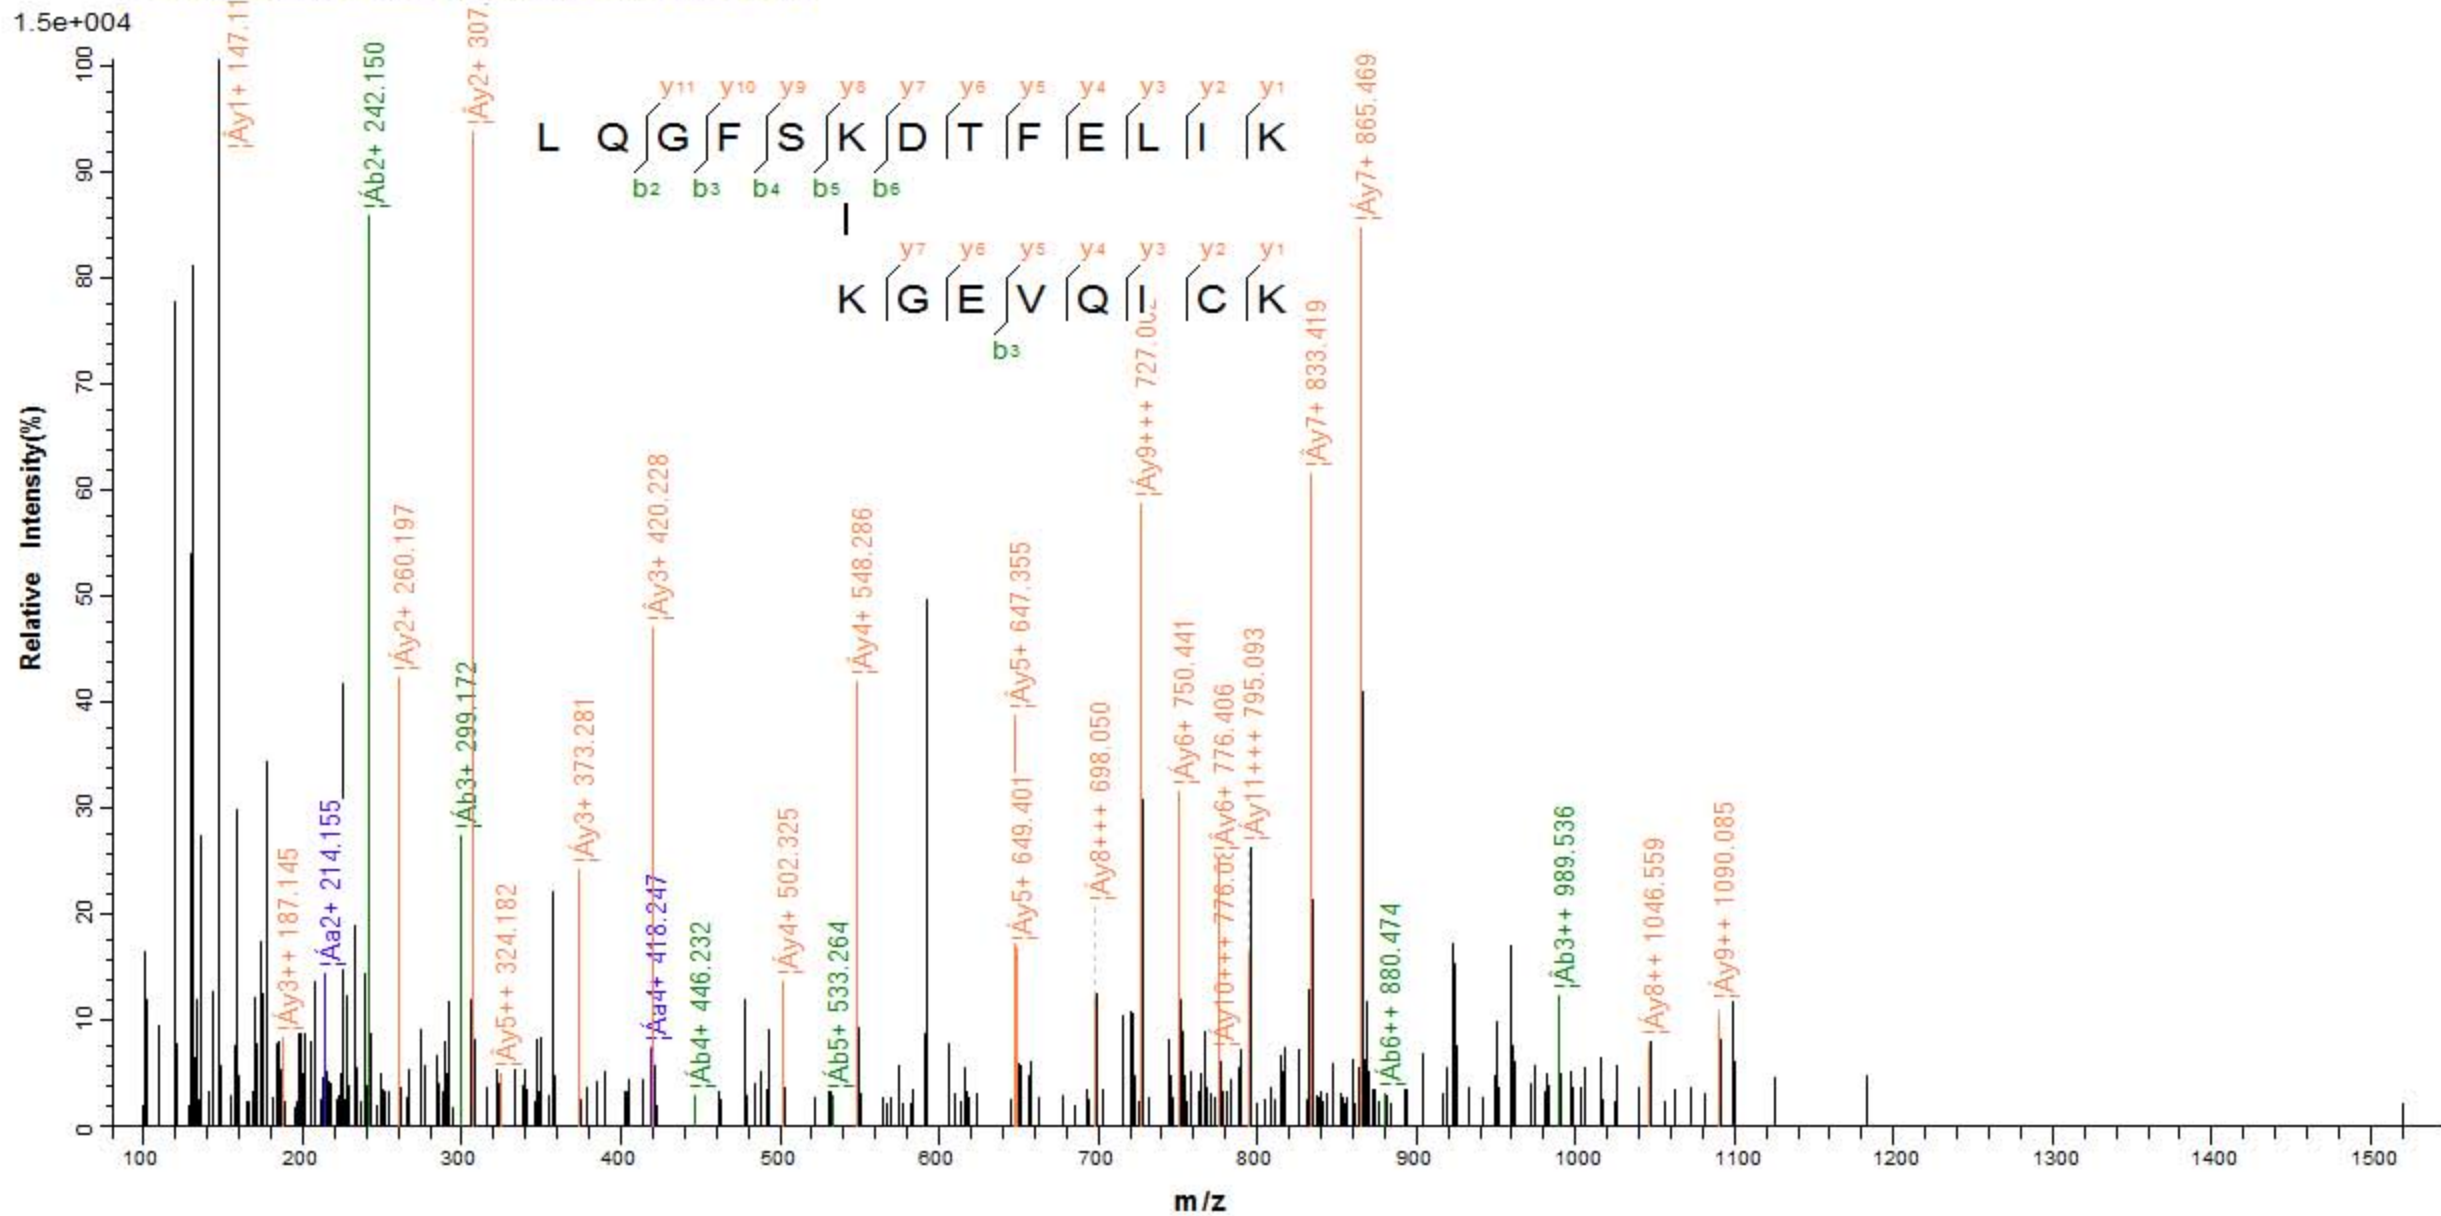

1.8e+004

Relative Intensity(%)

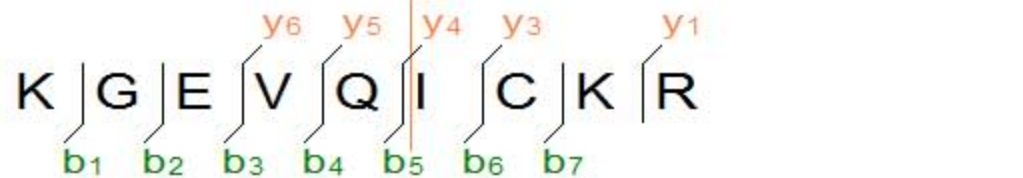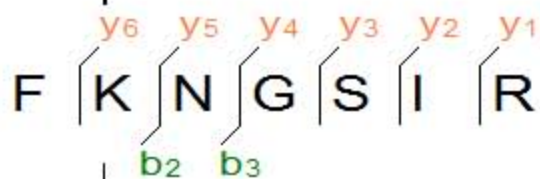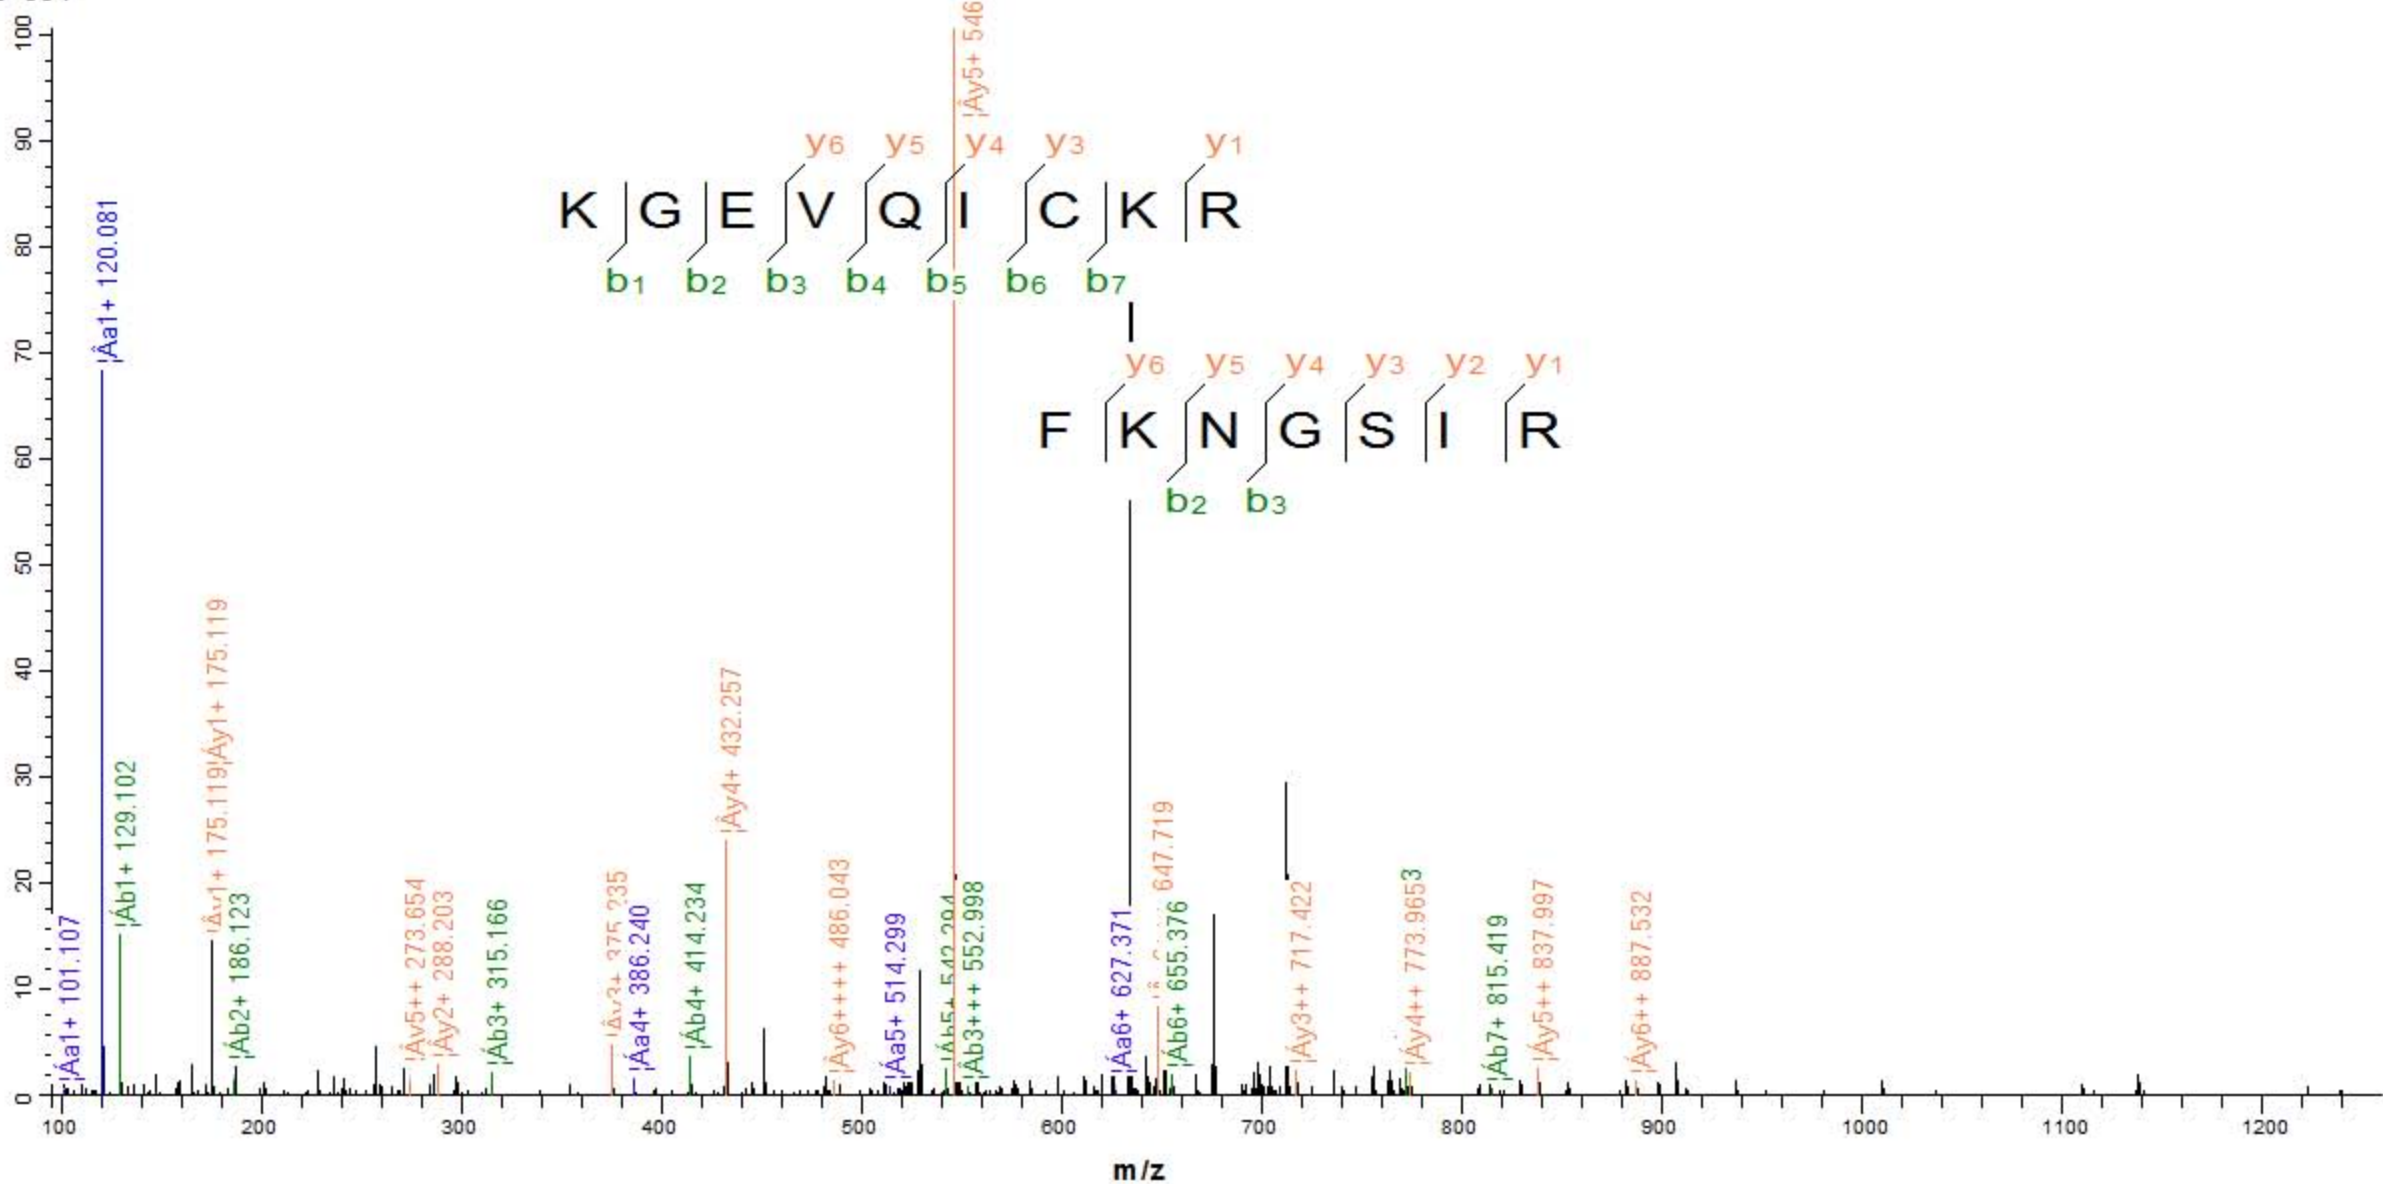

m/z

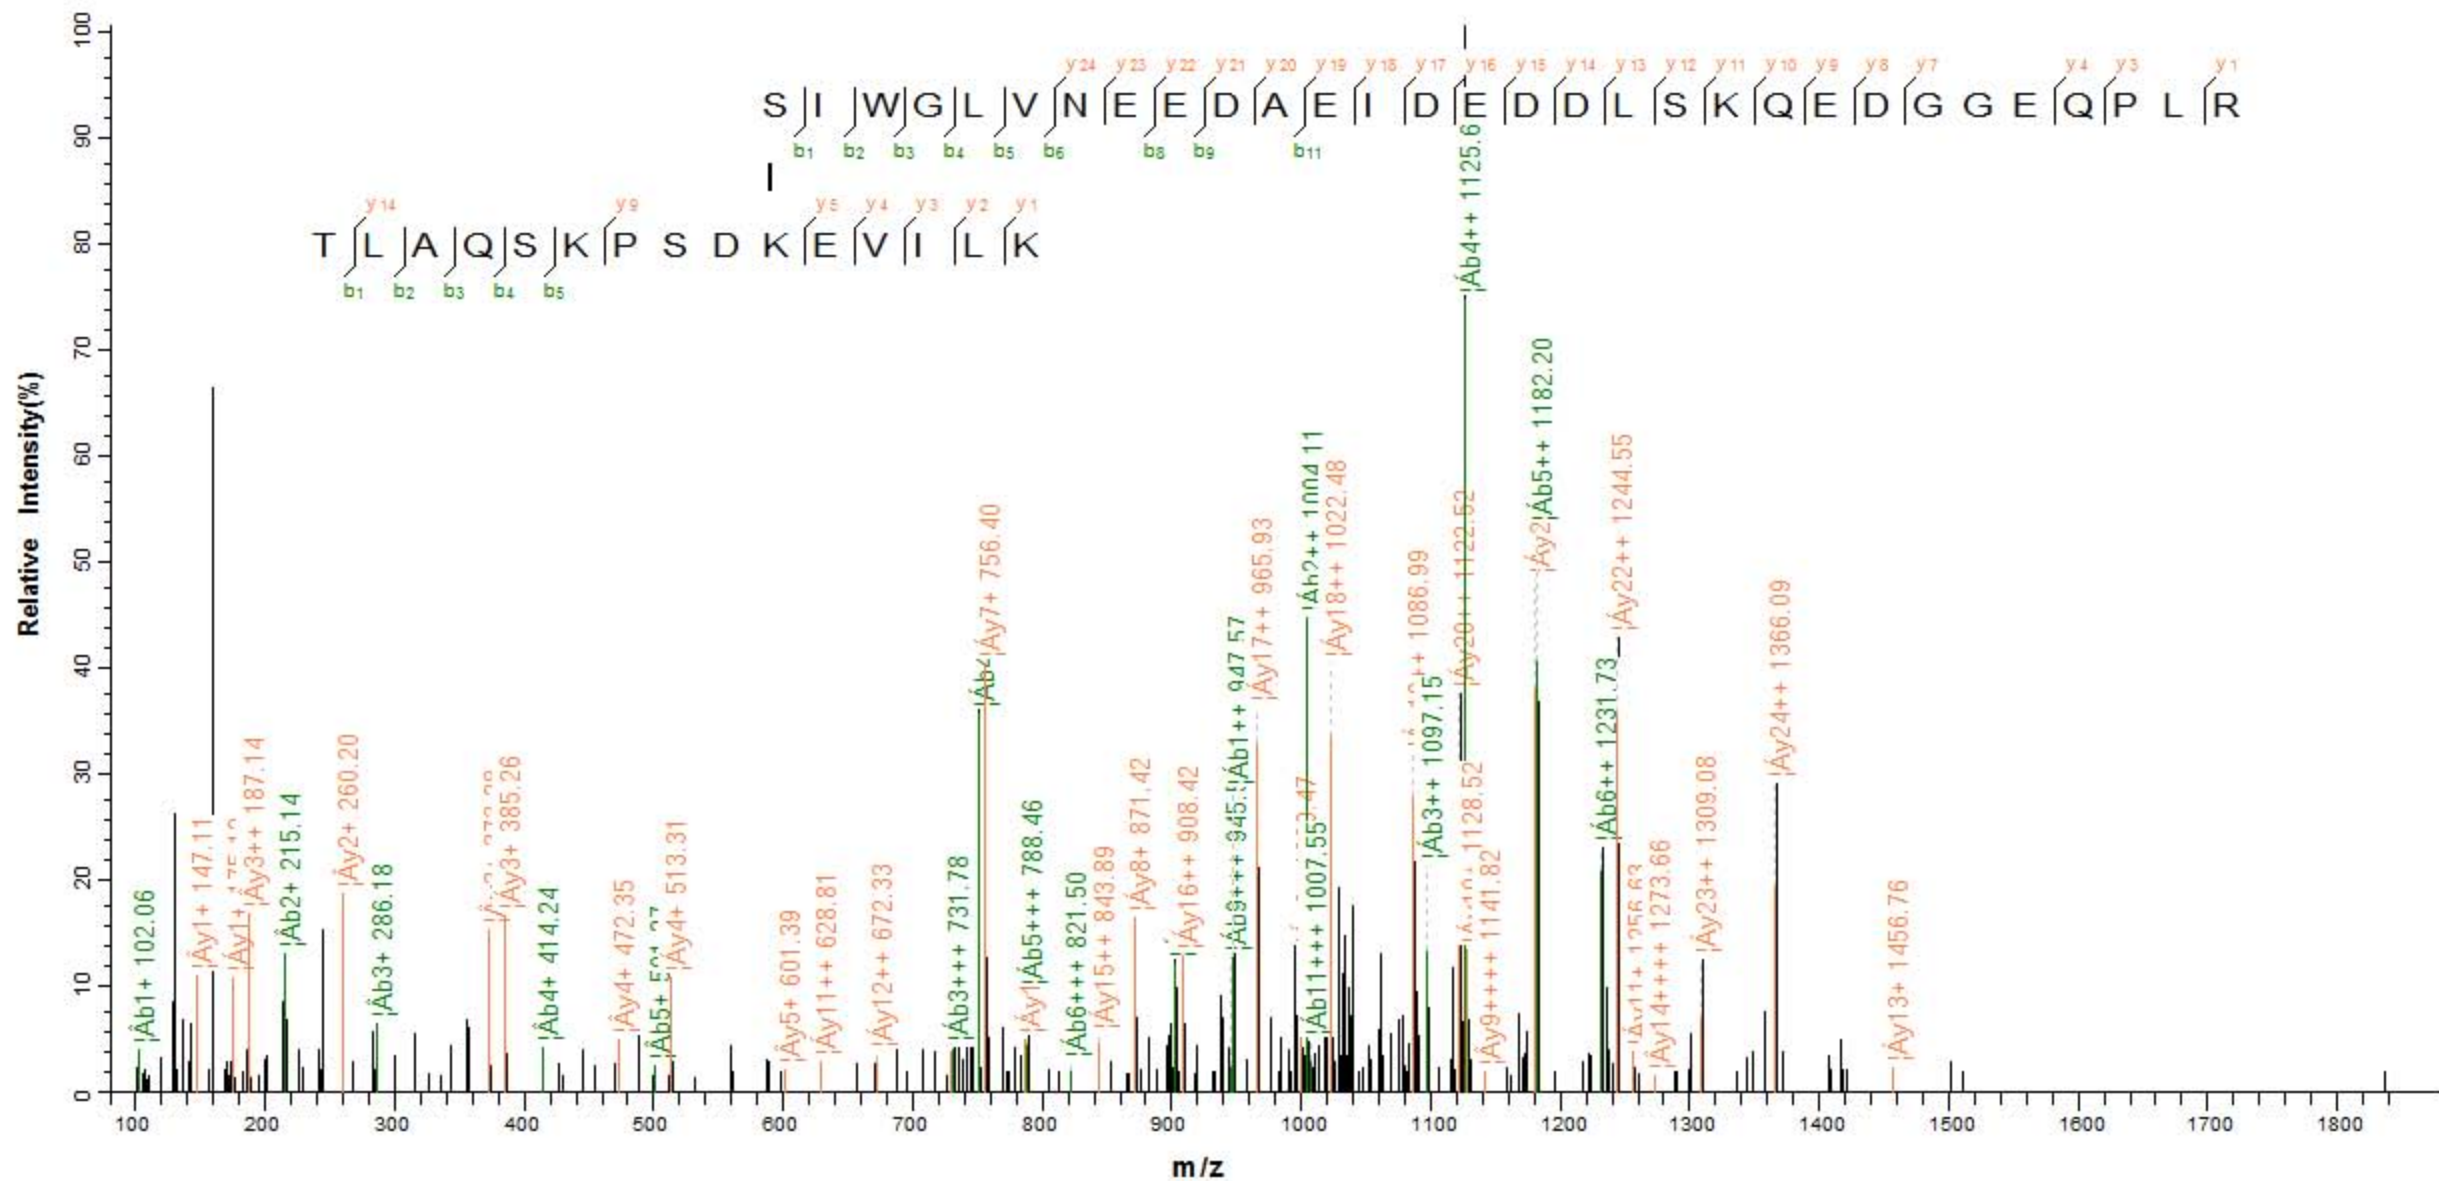

1.8e+004

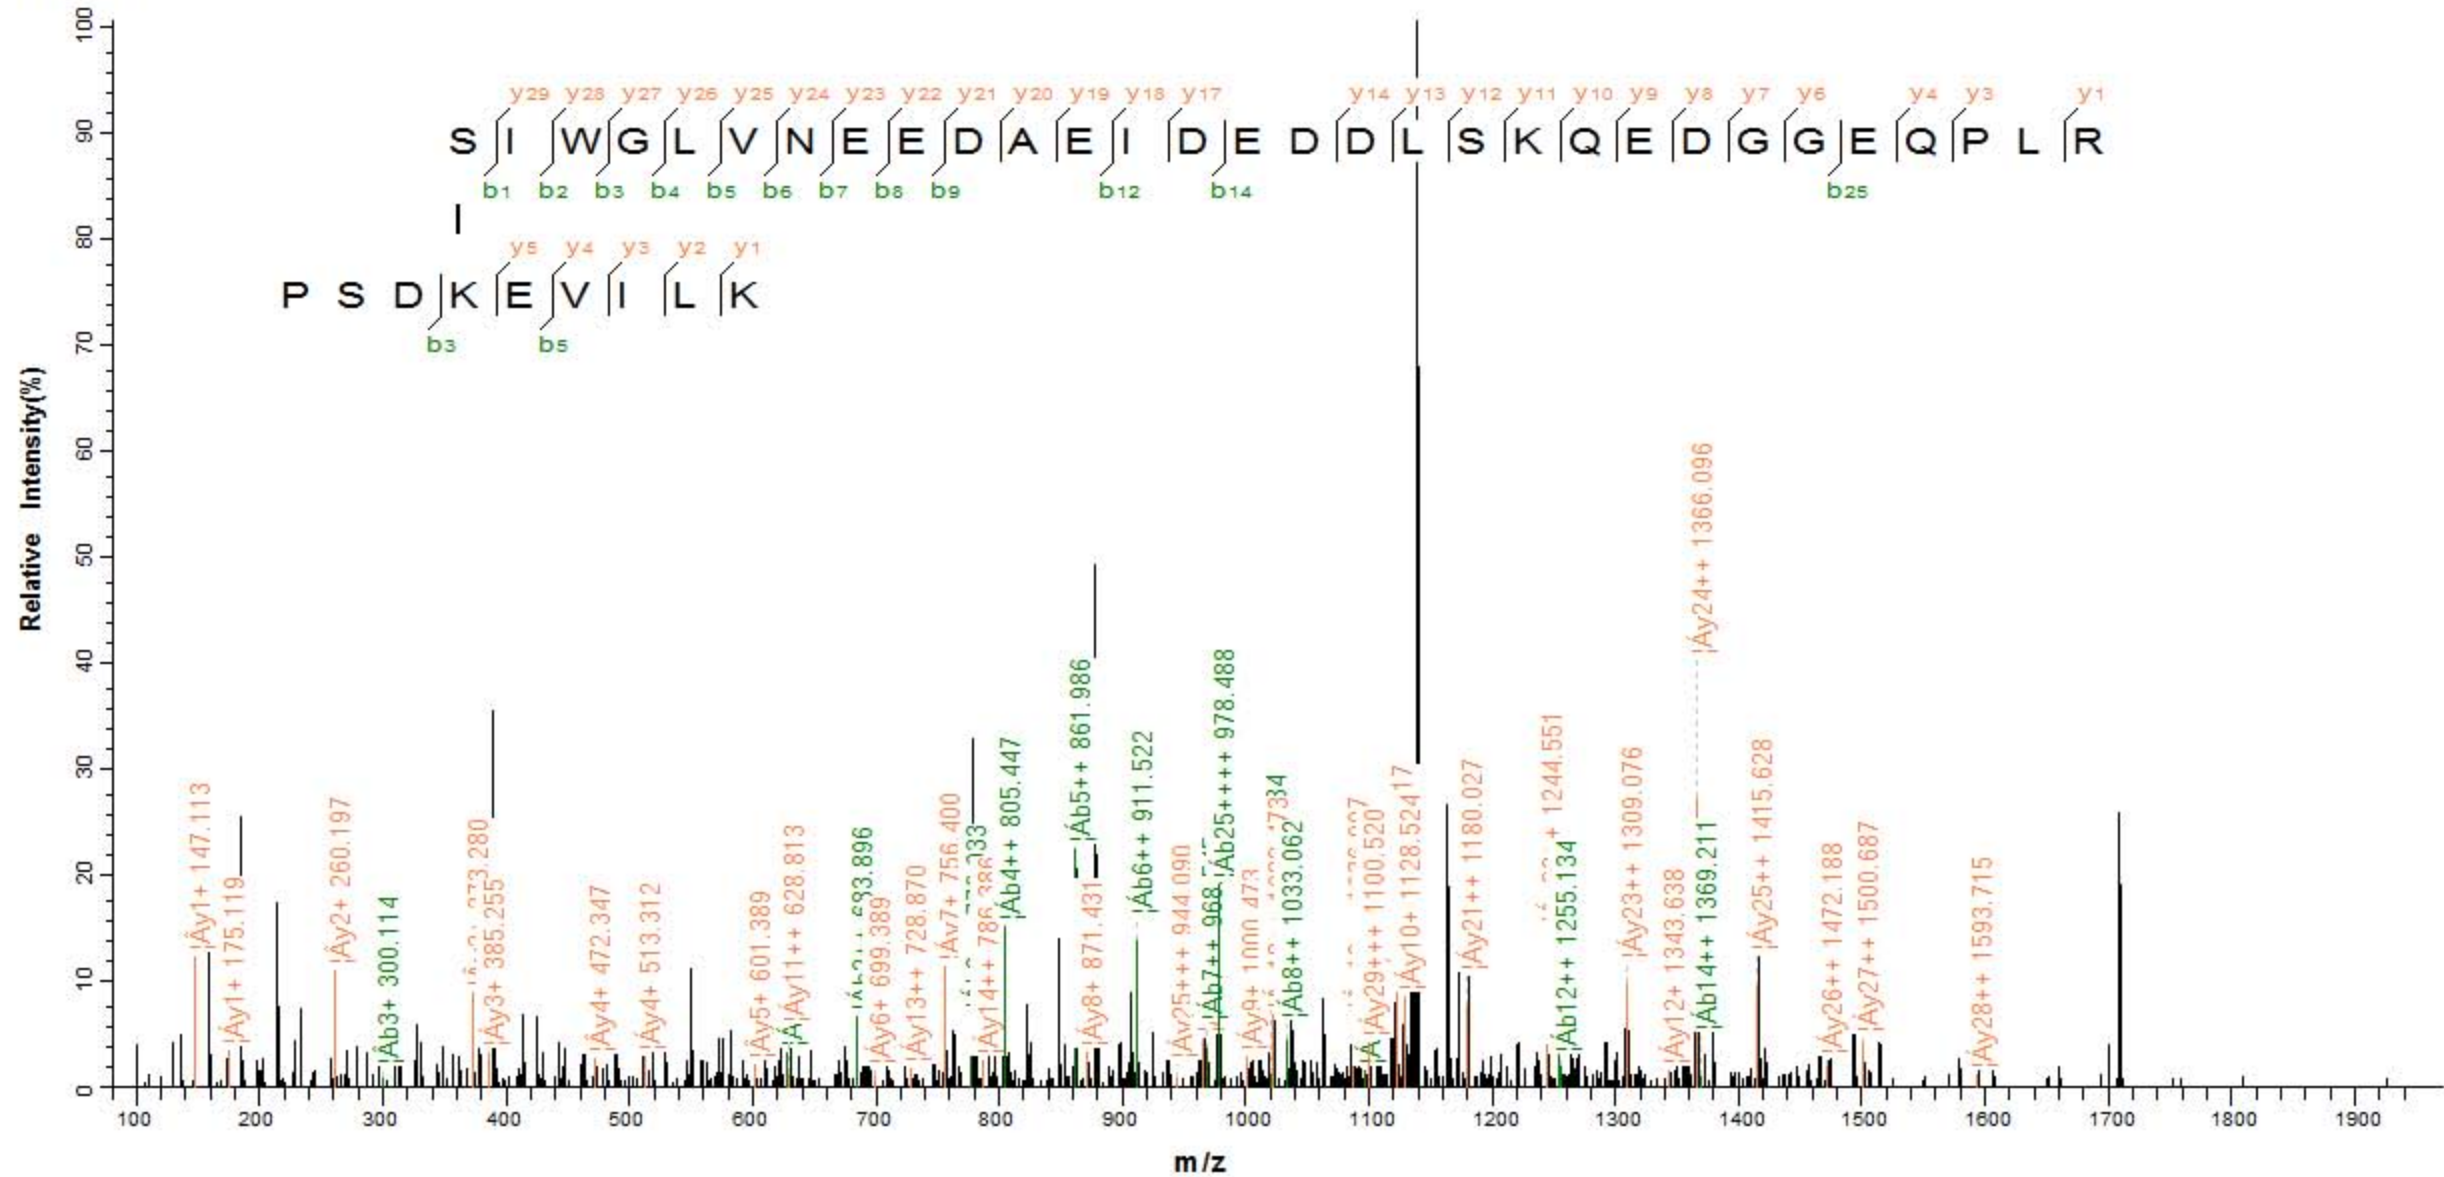

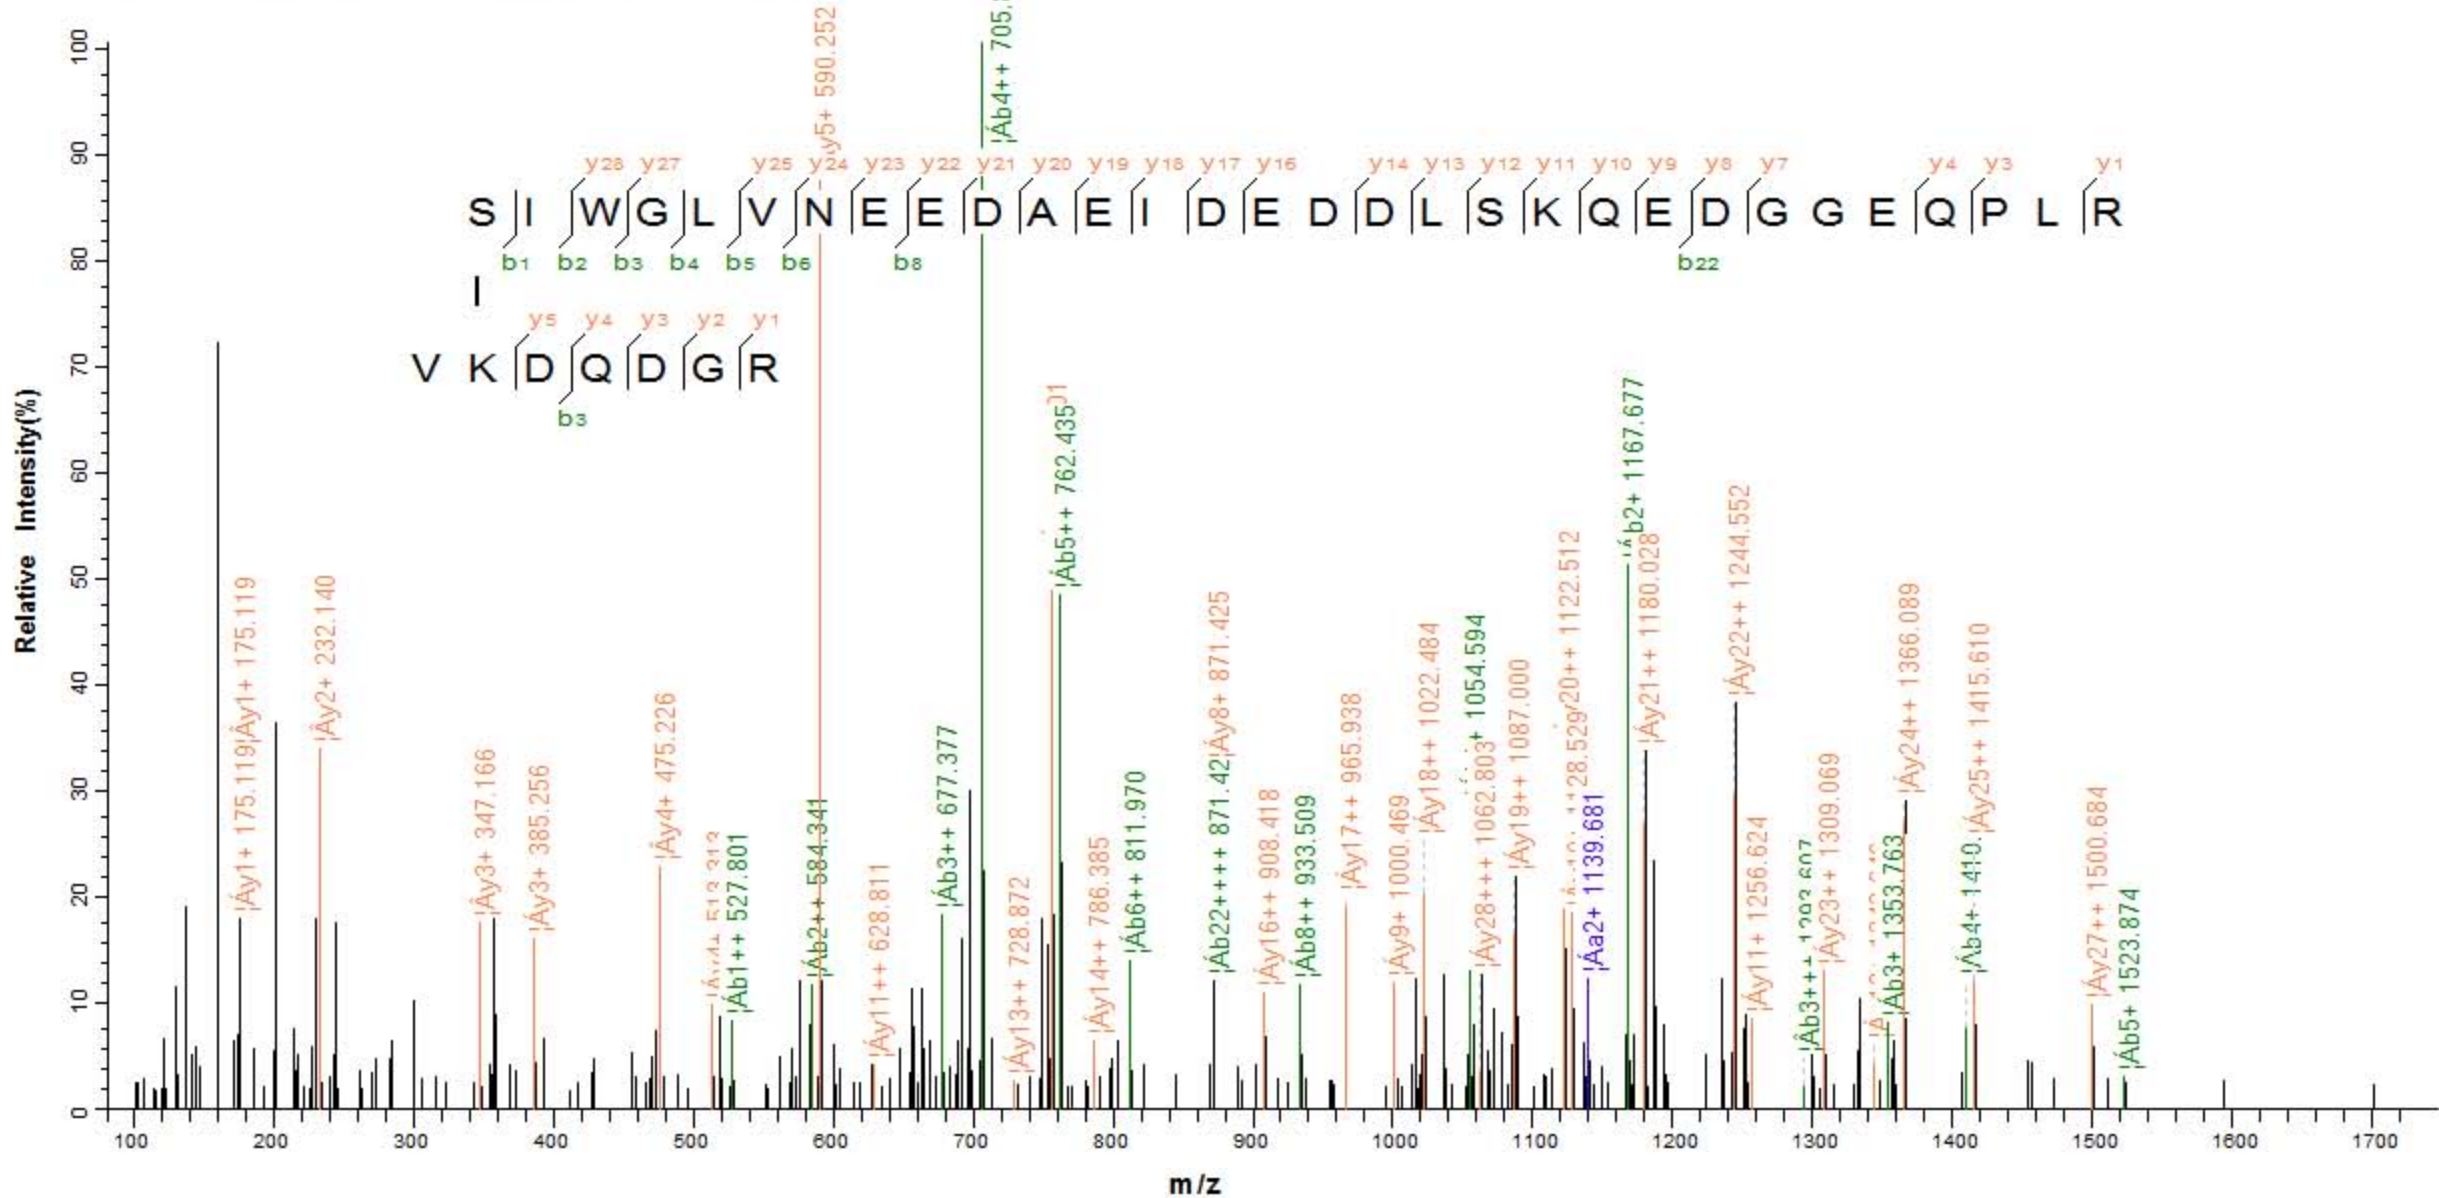

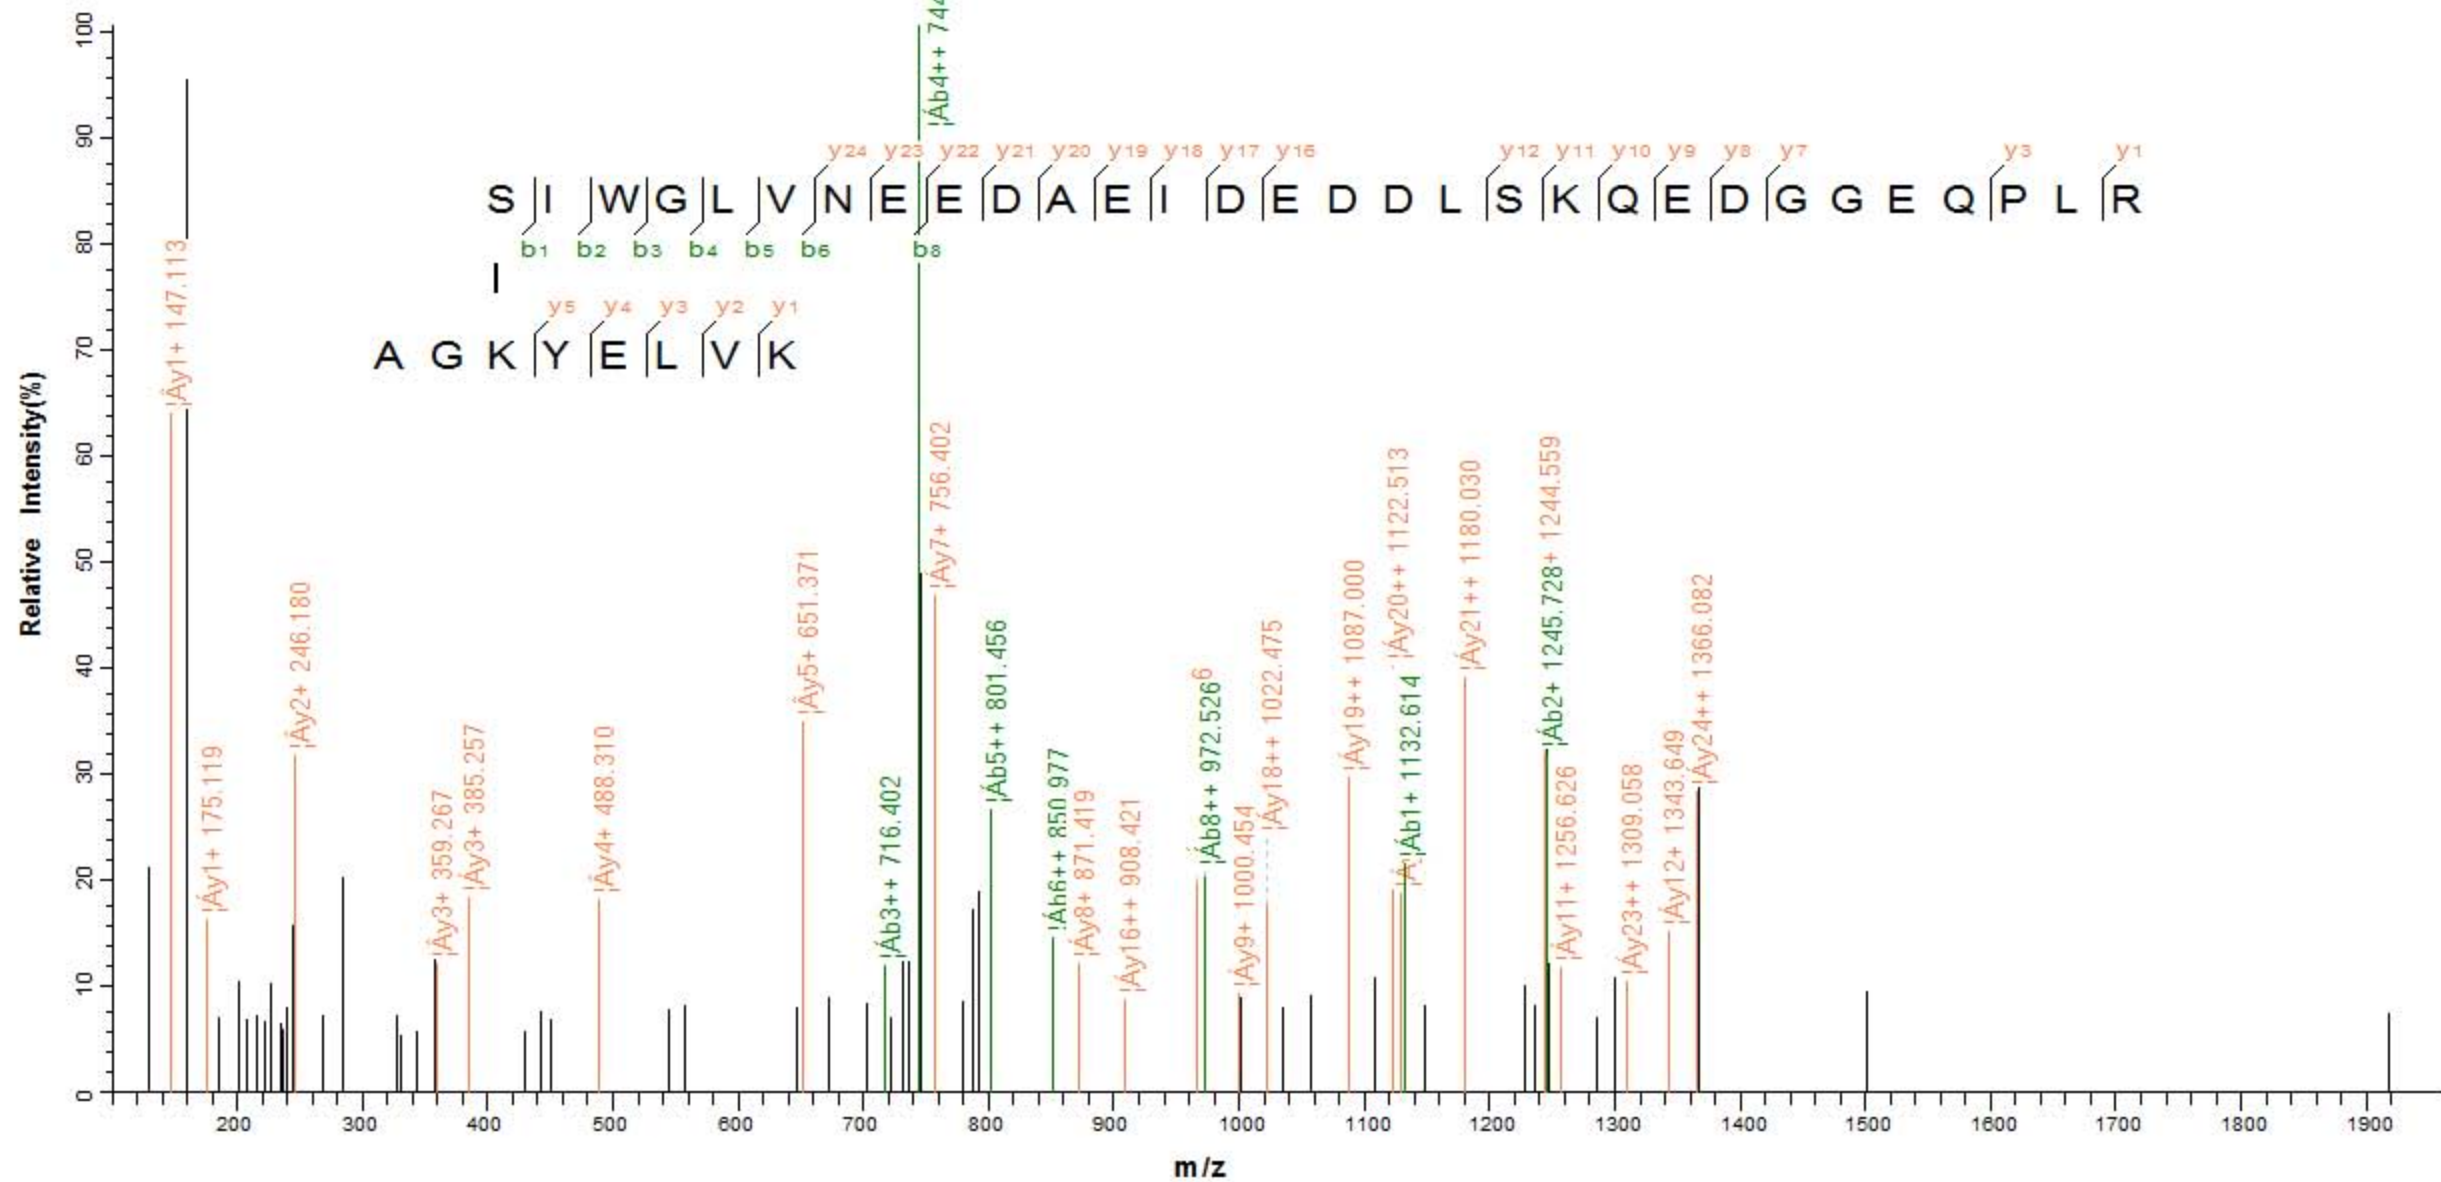



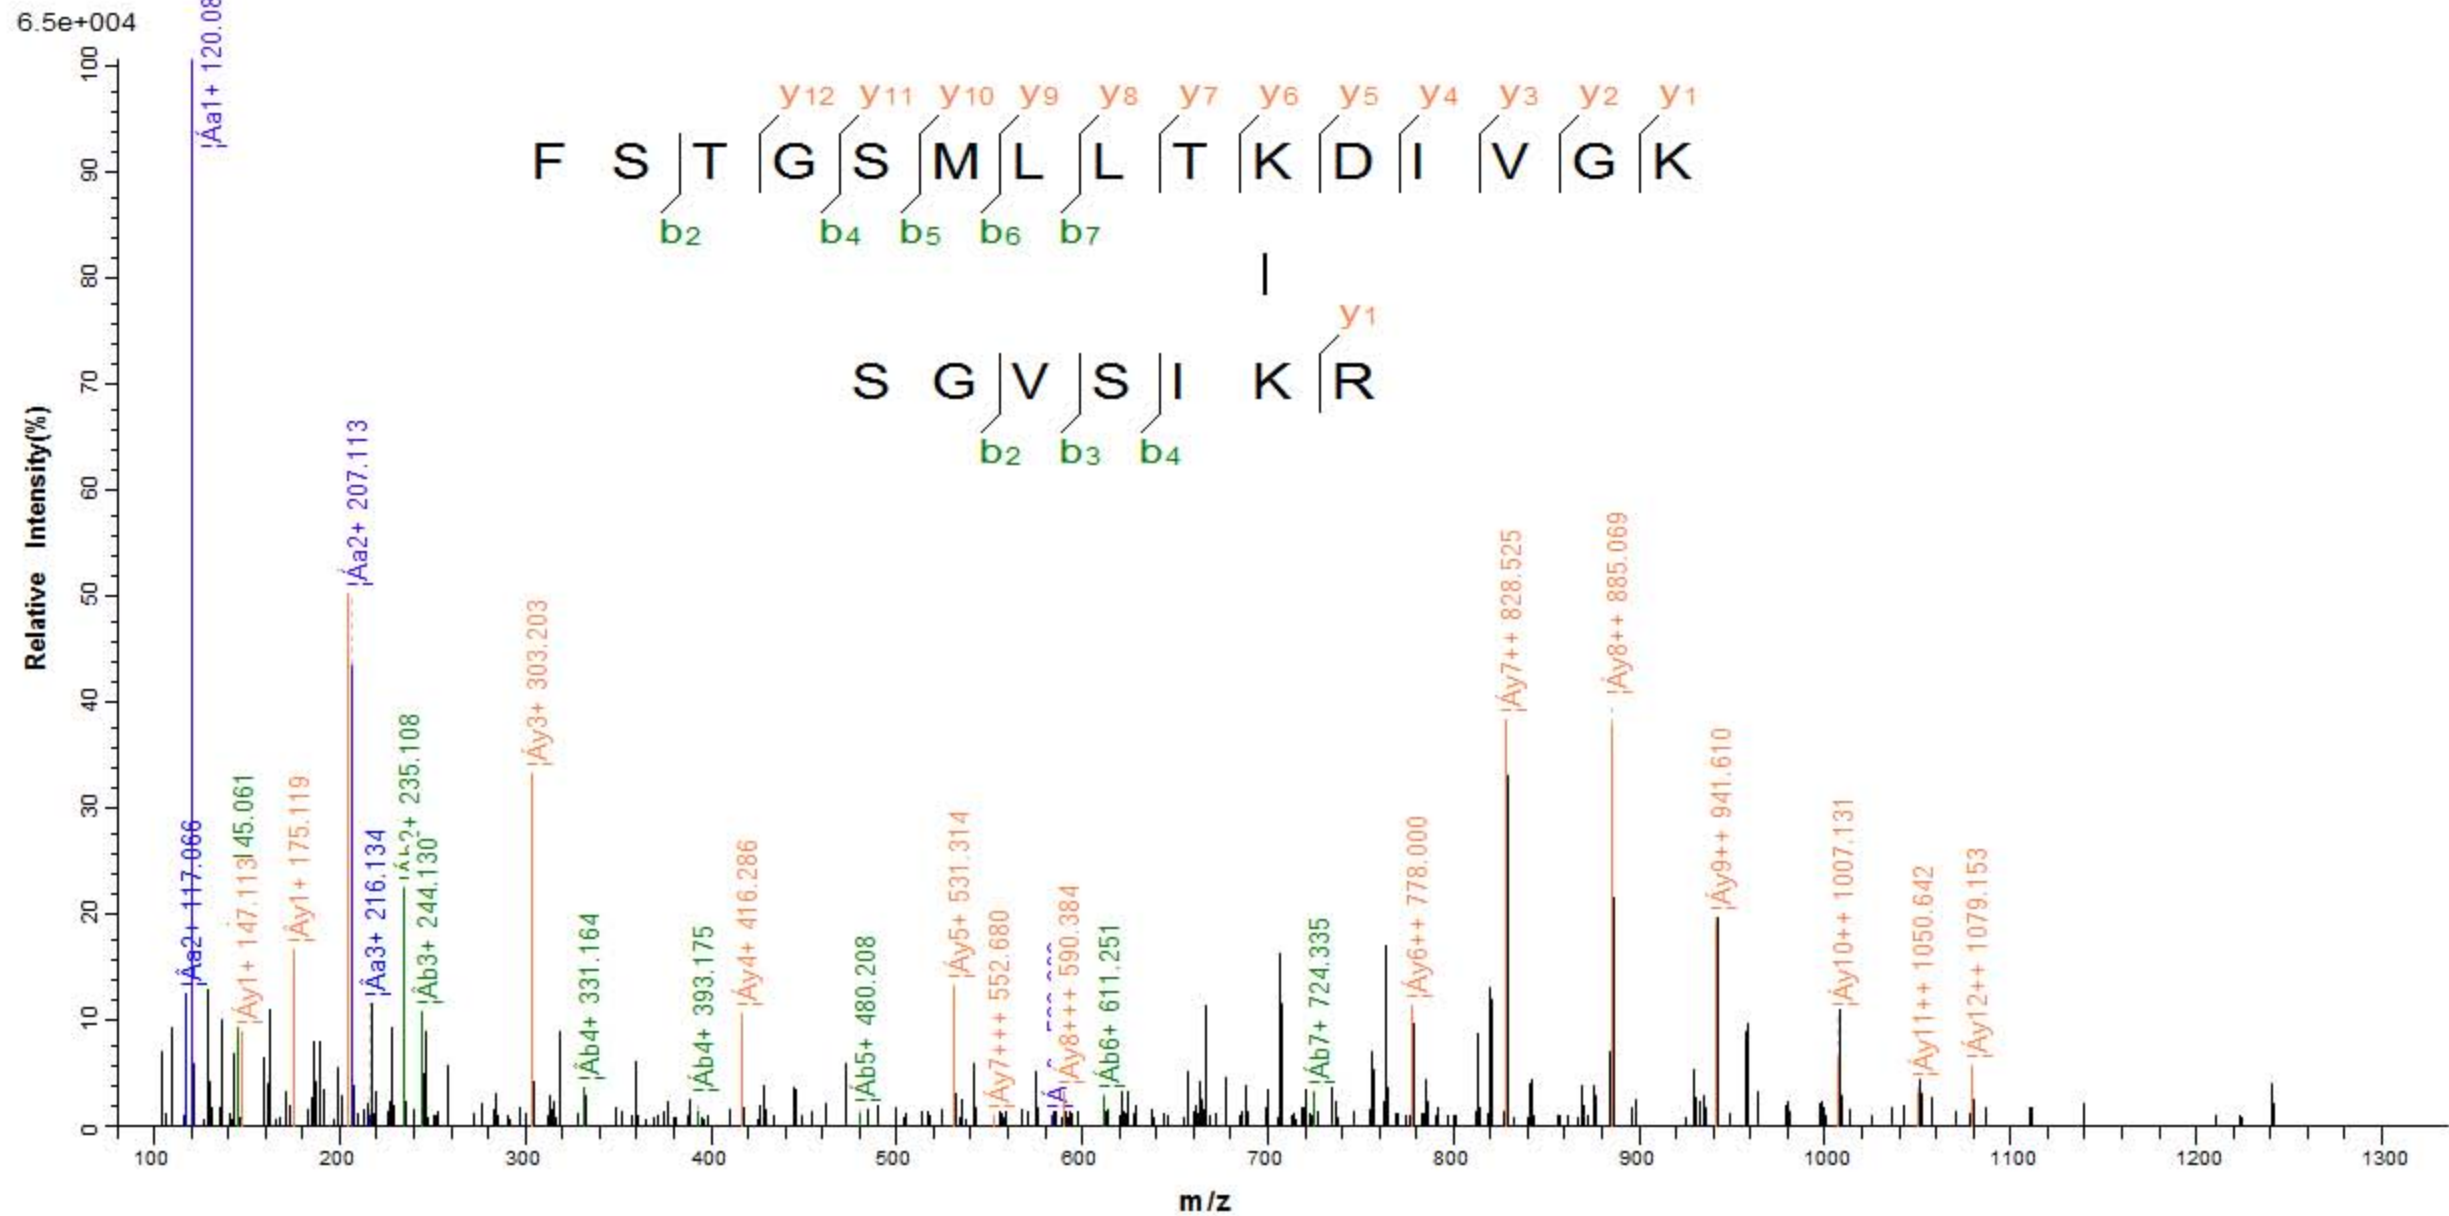

5.7e+004

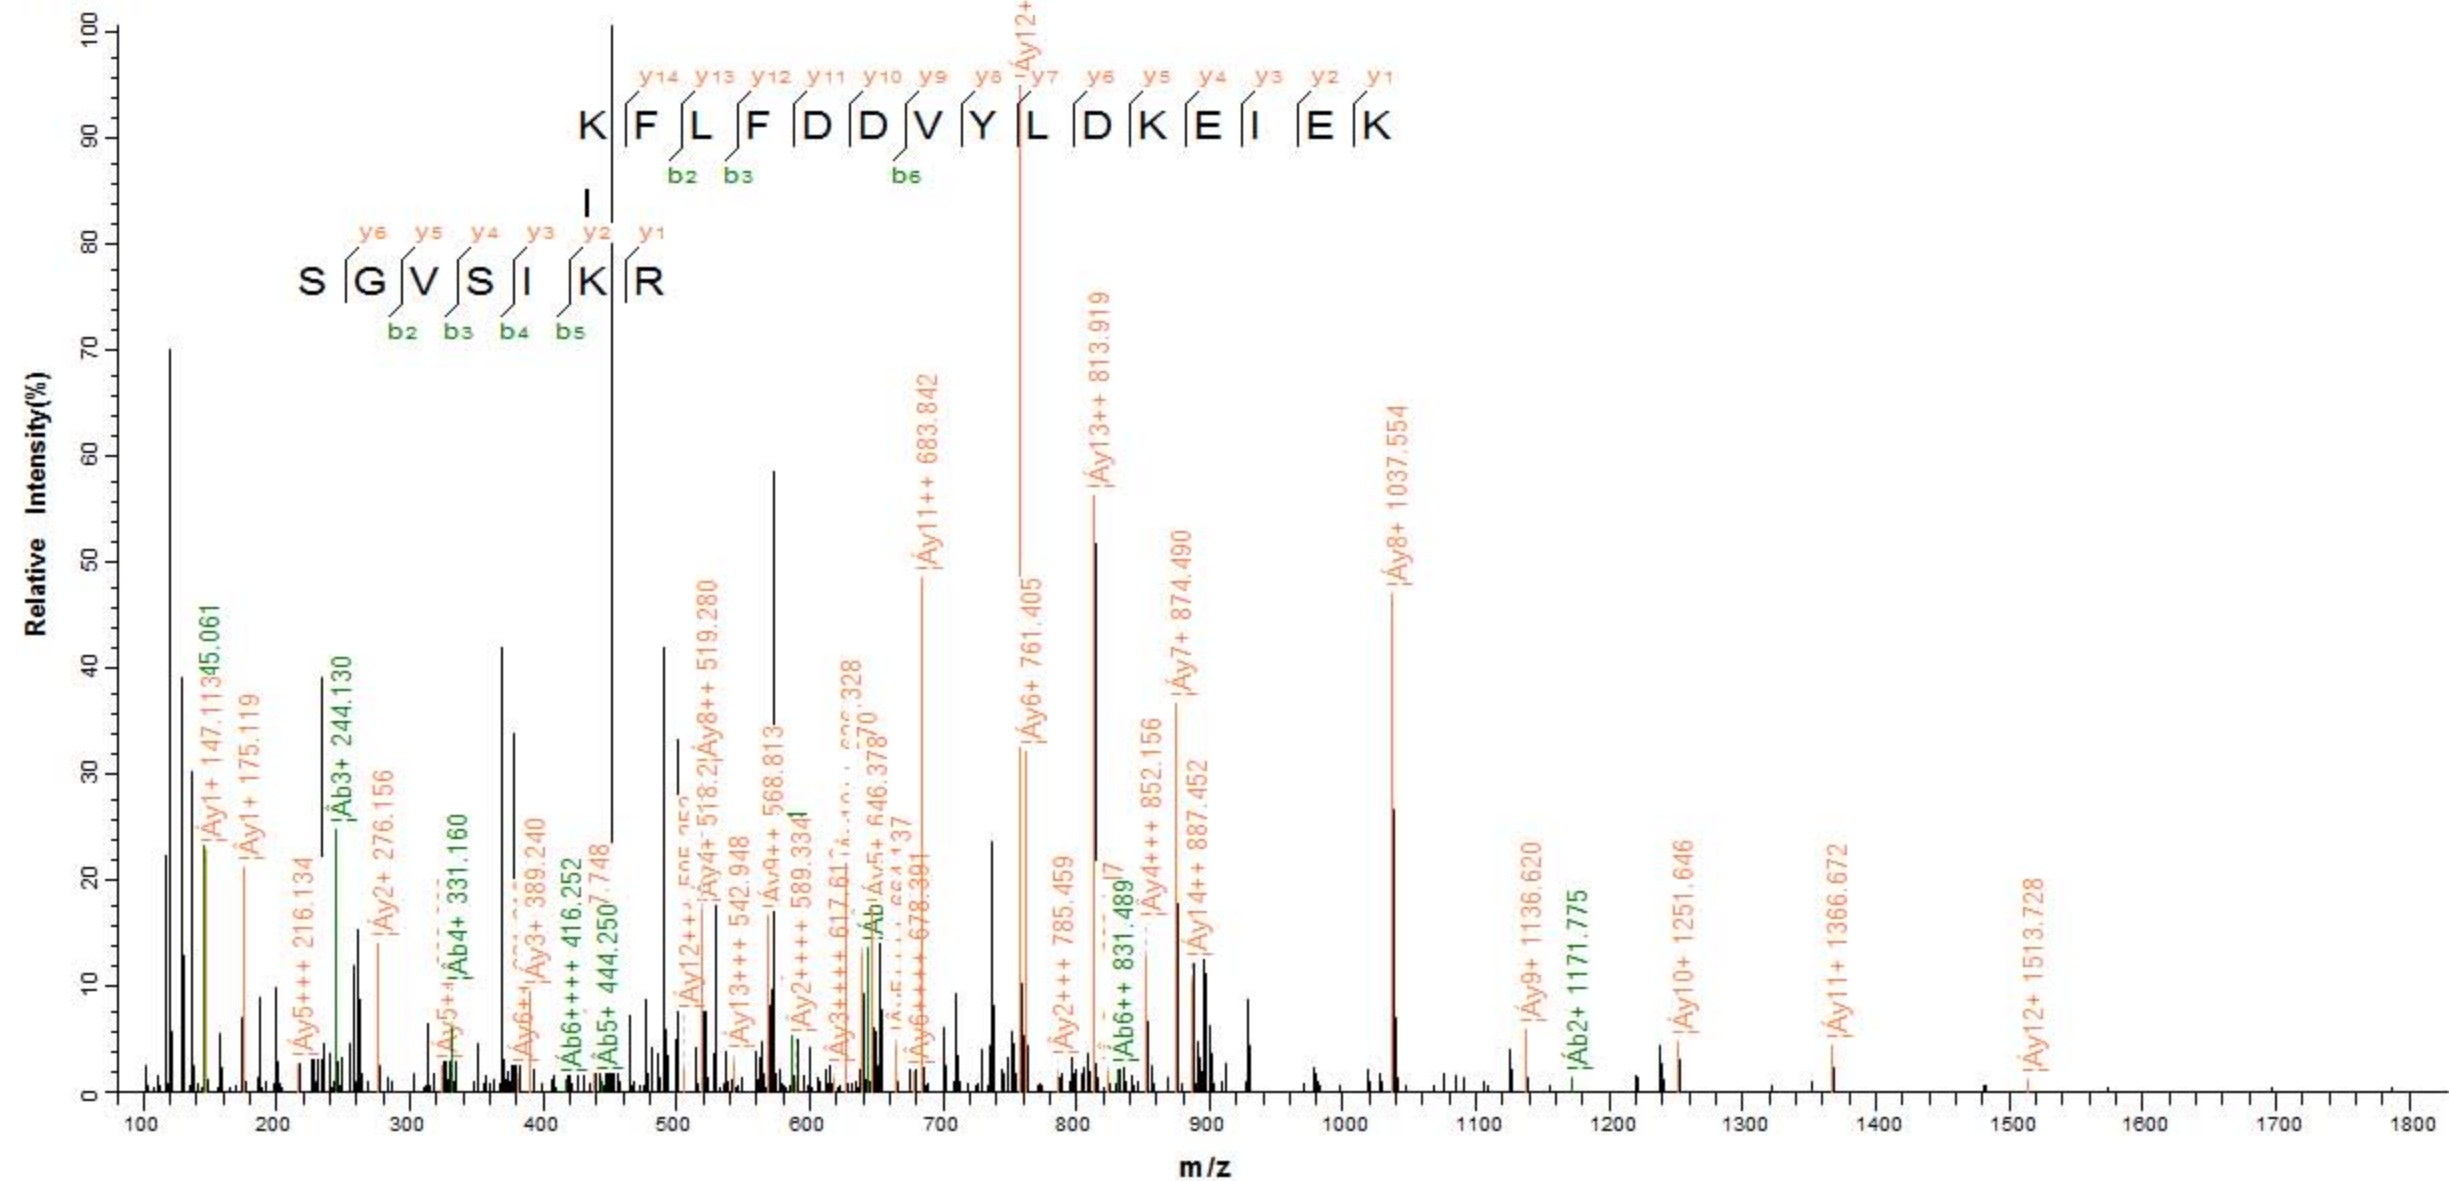

5.6e+003

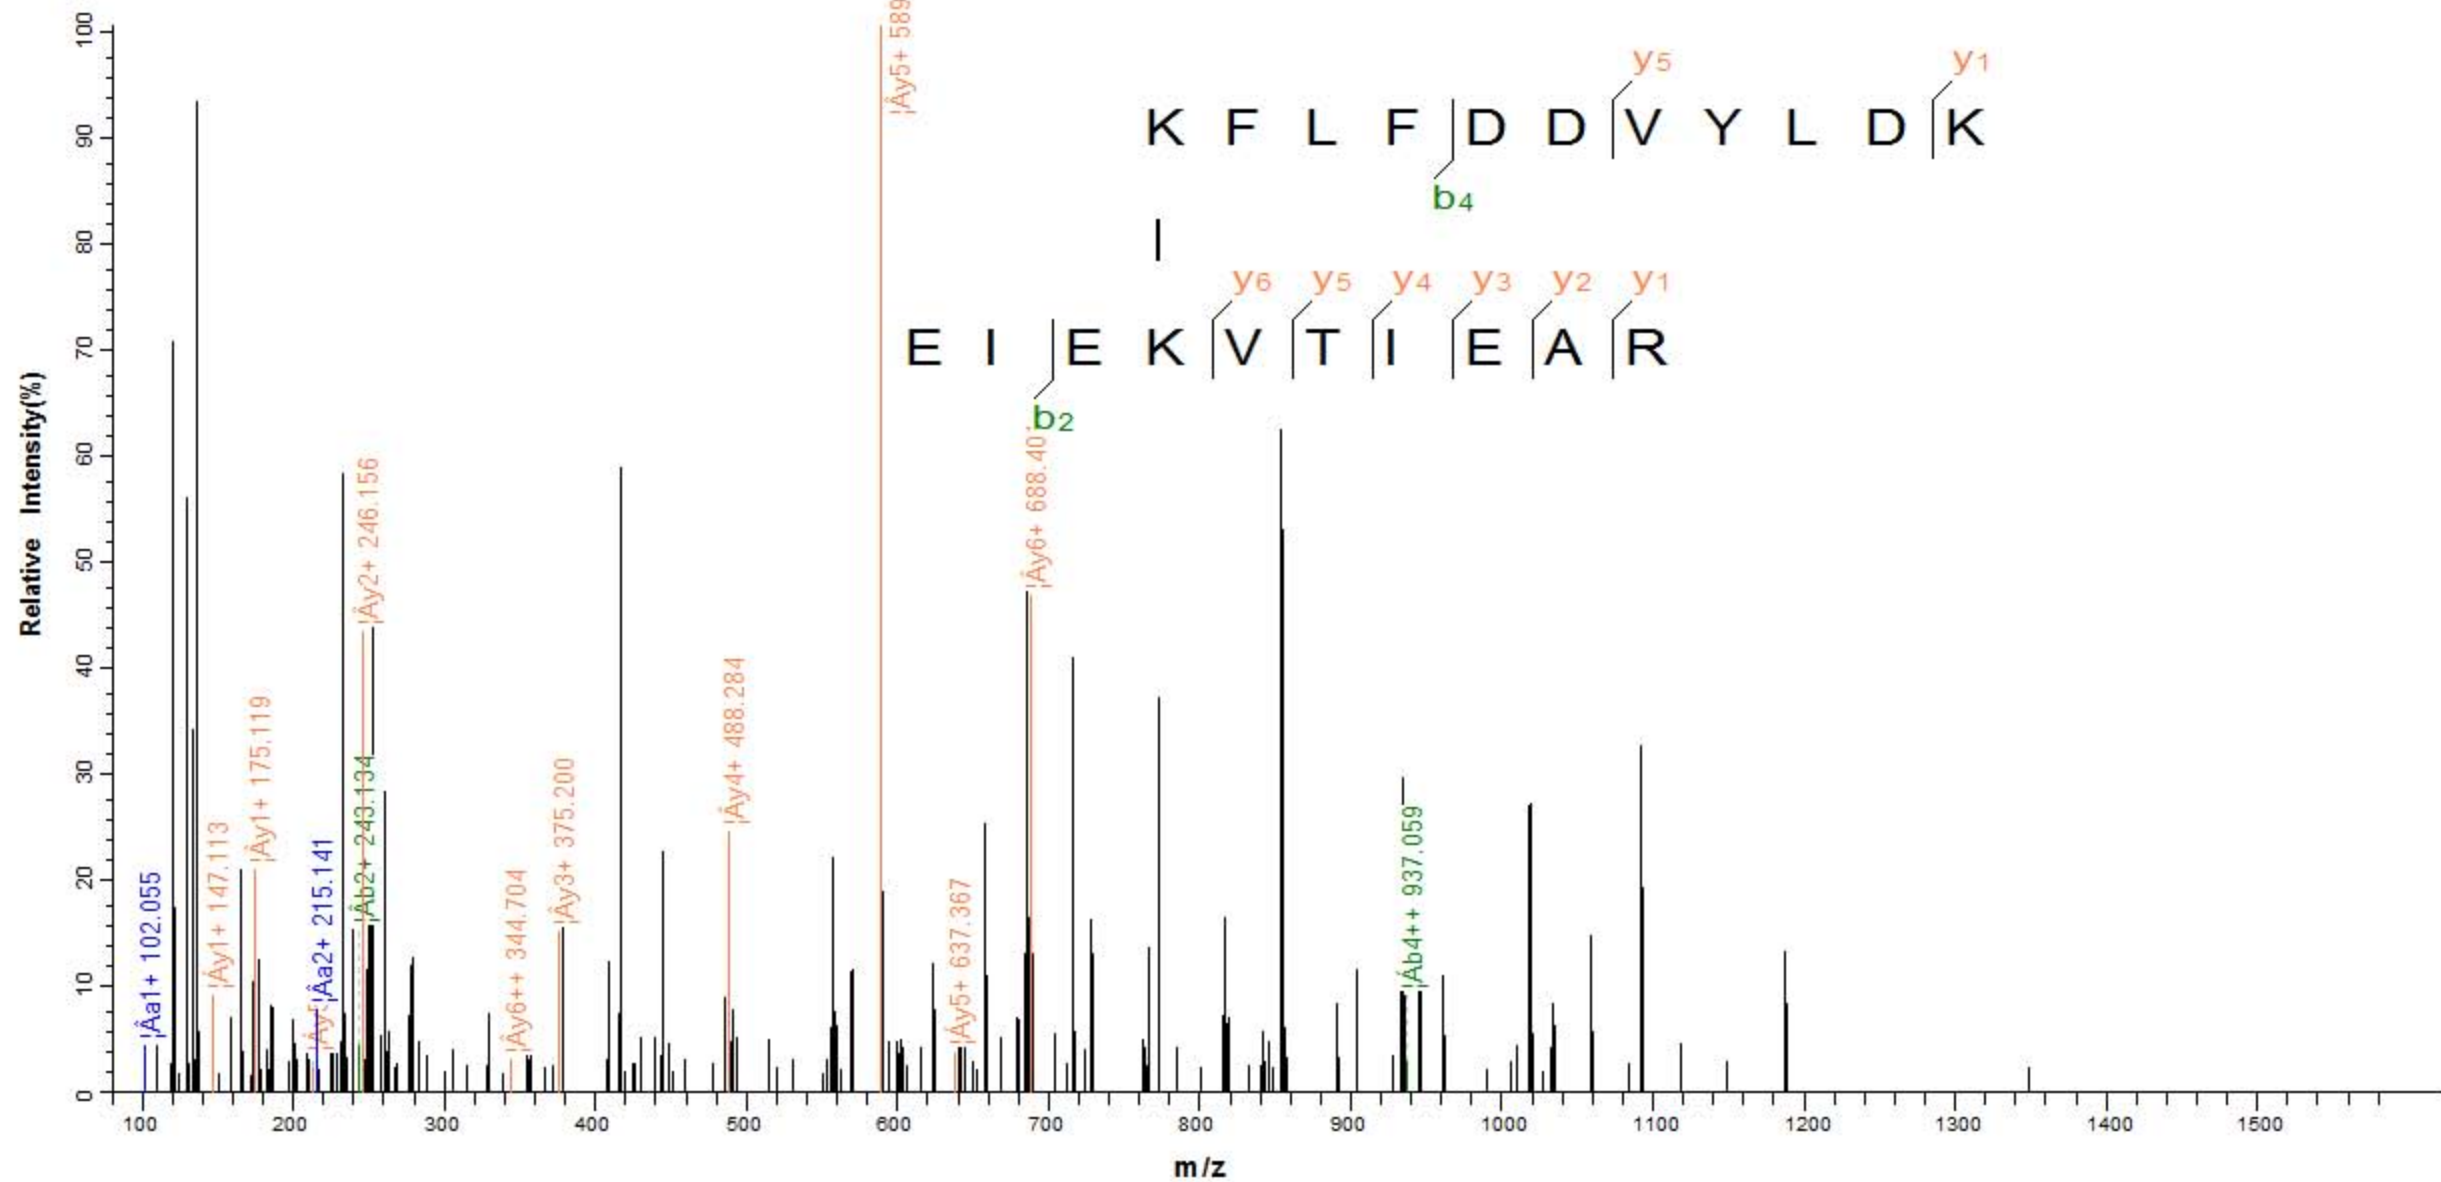

2.4e+004

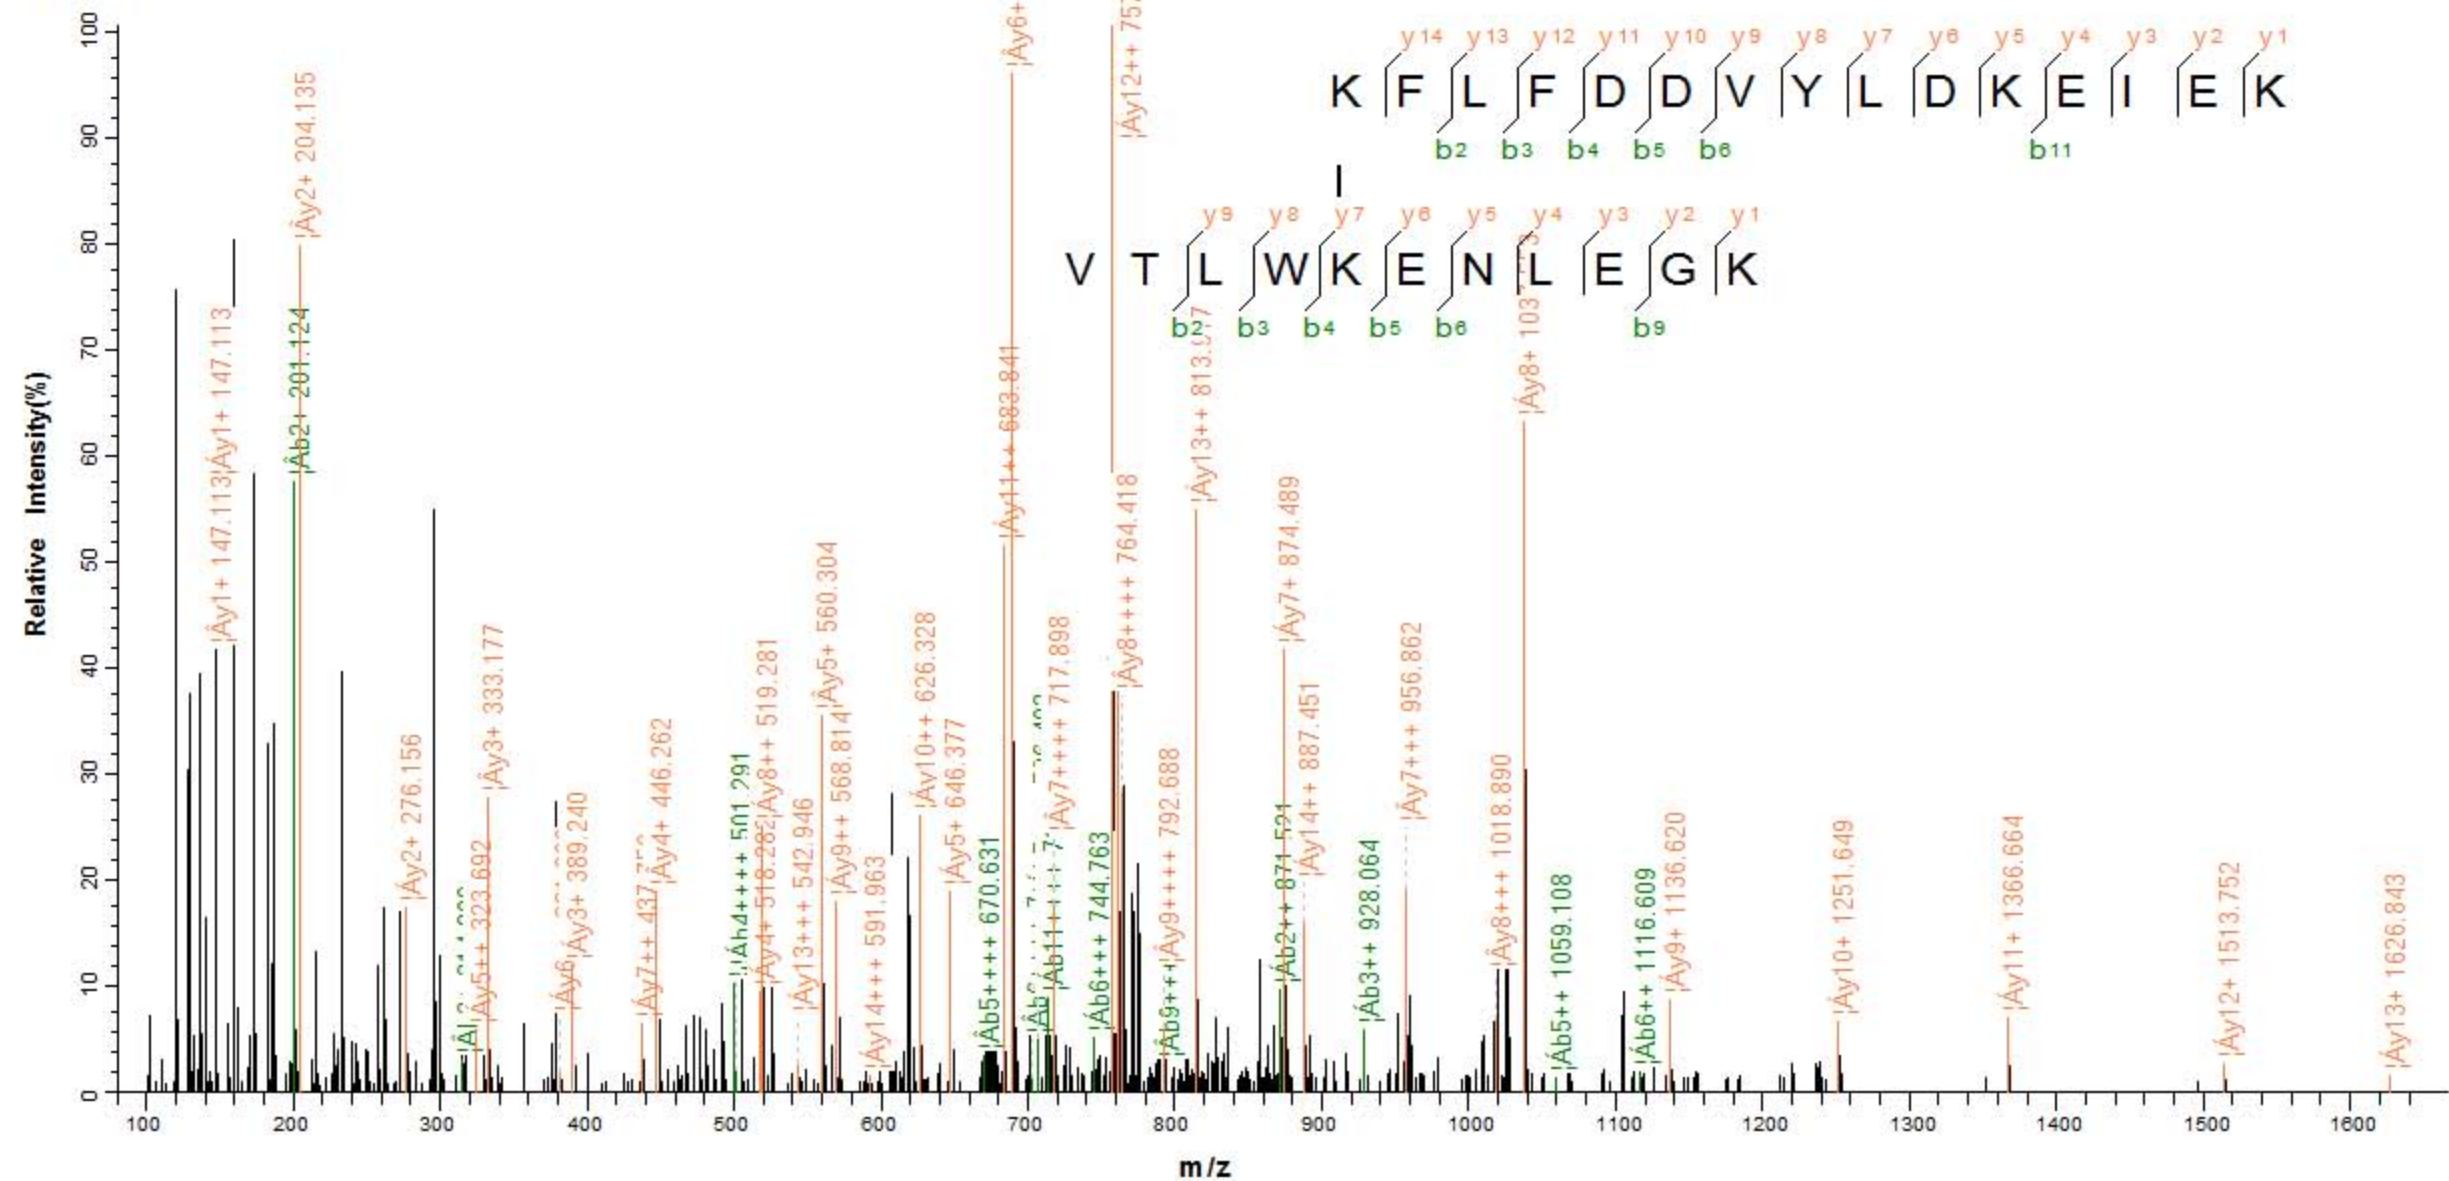

1.4e+004

Relative Intensity(%)

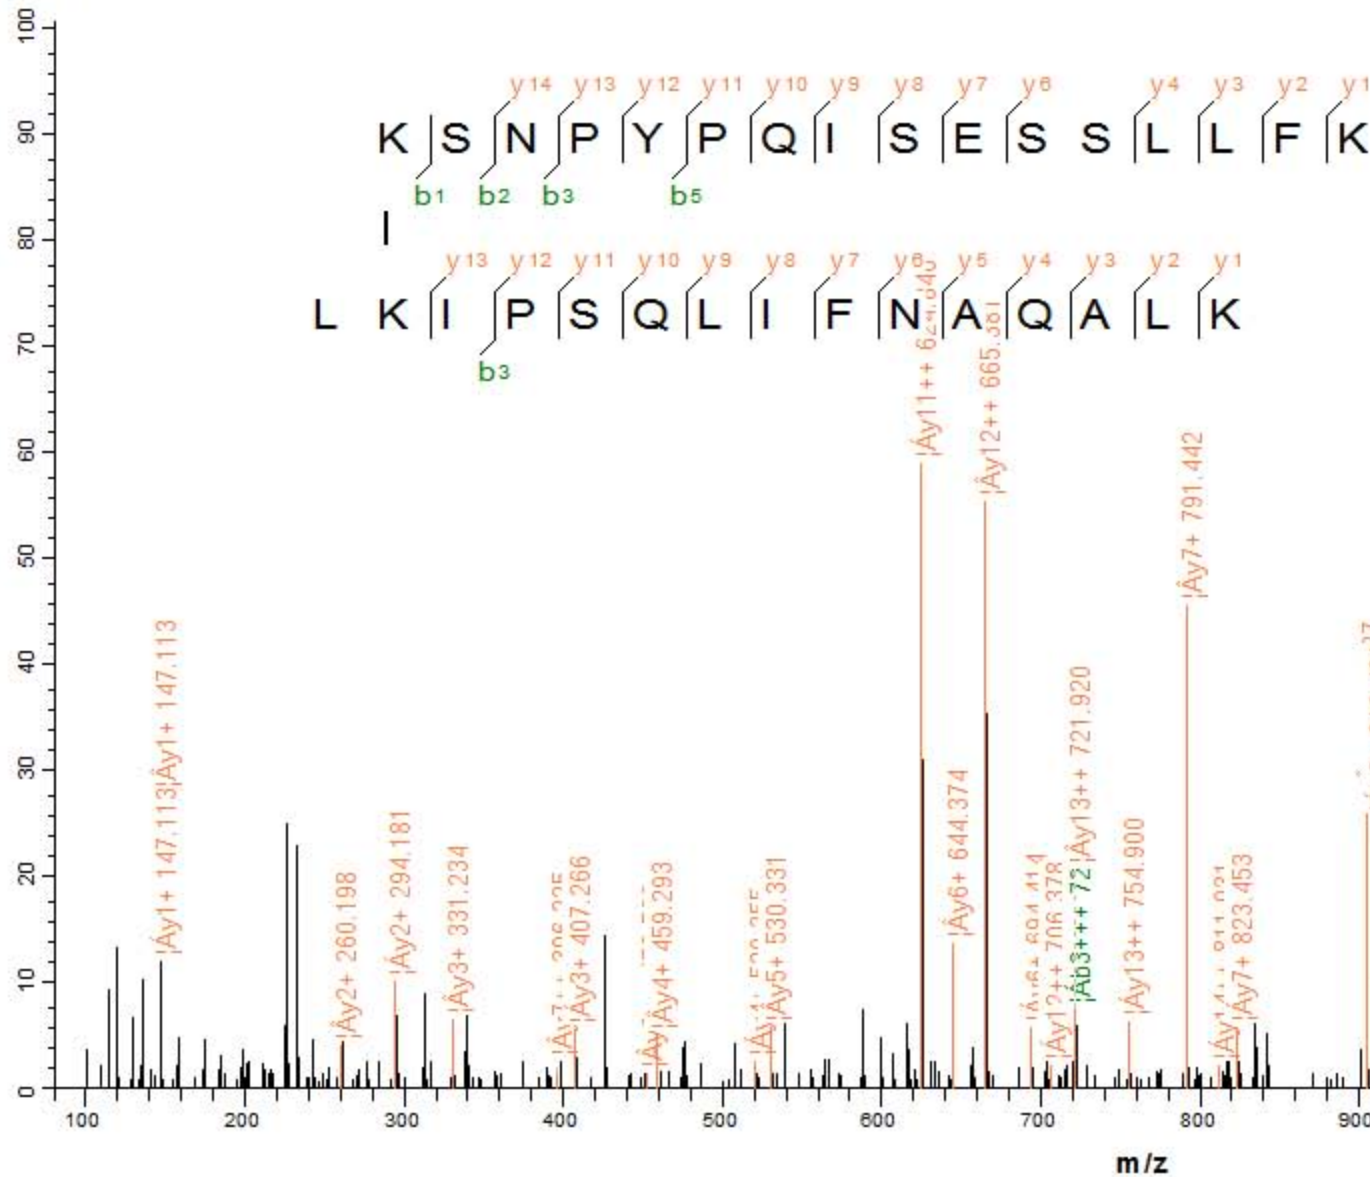

m/z

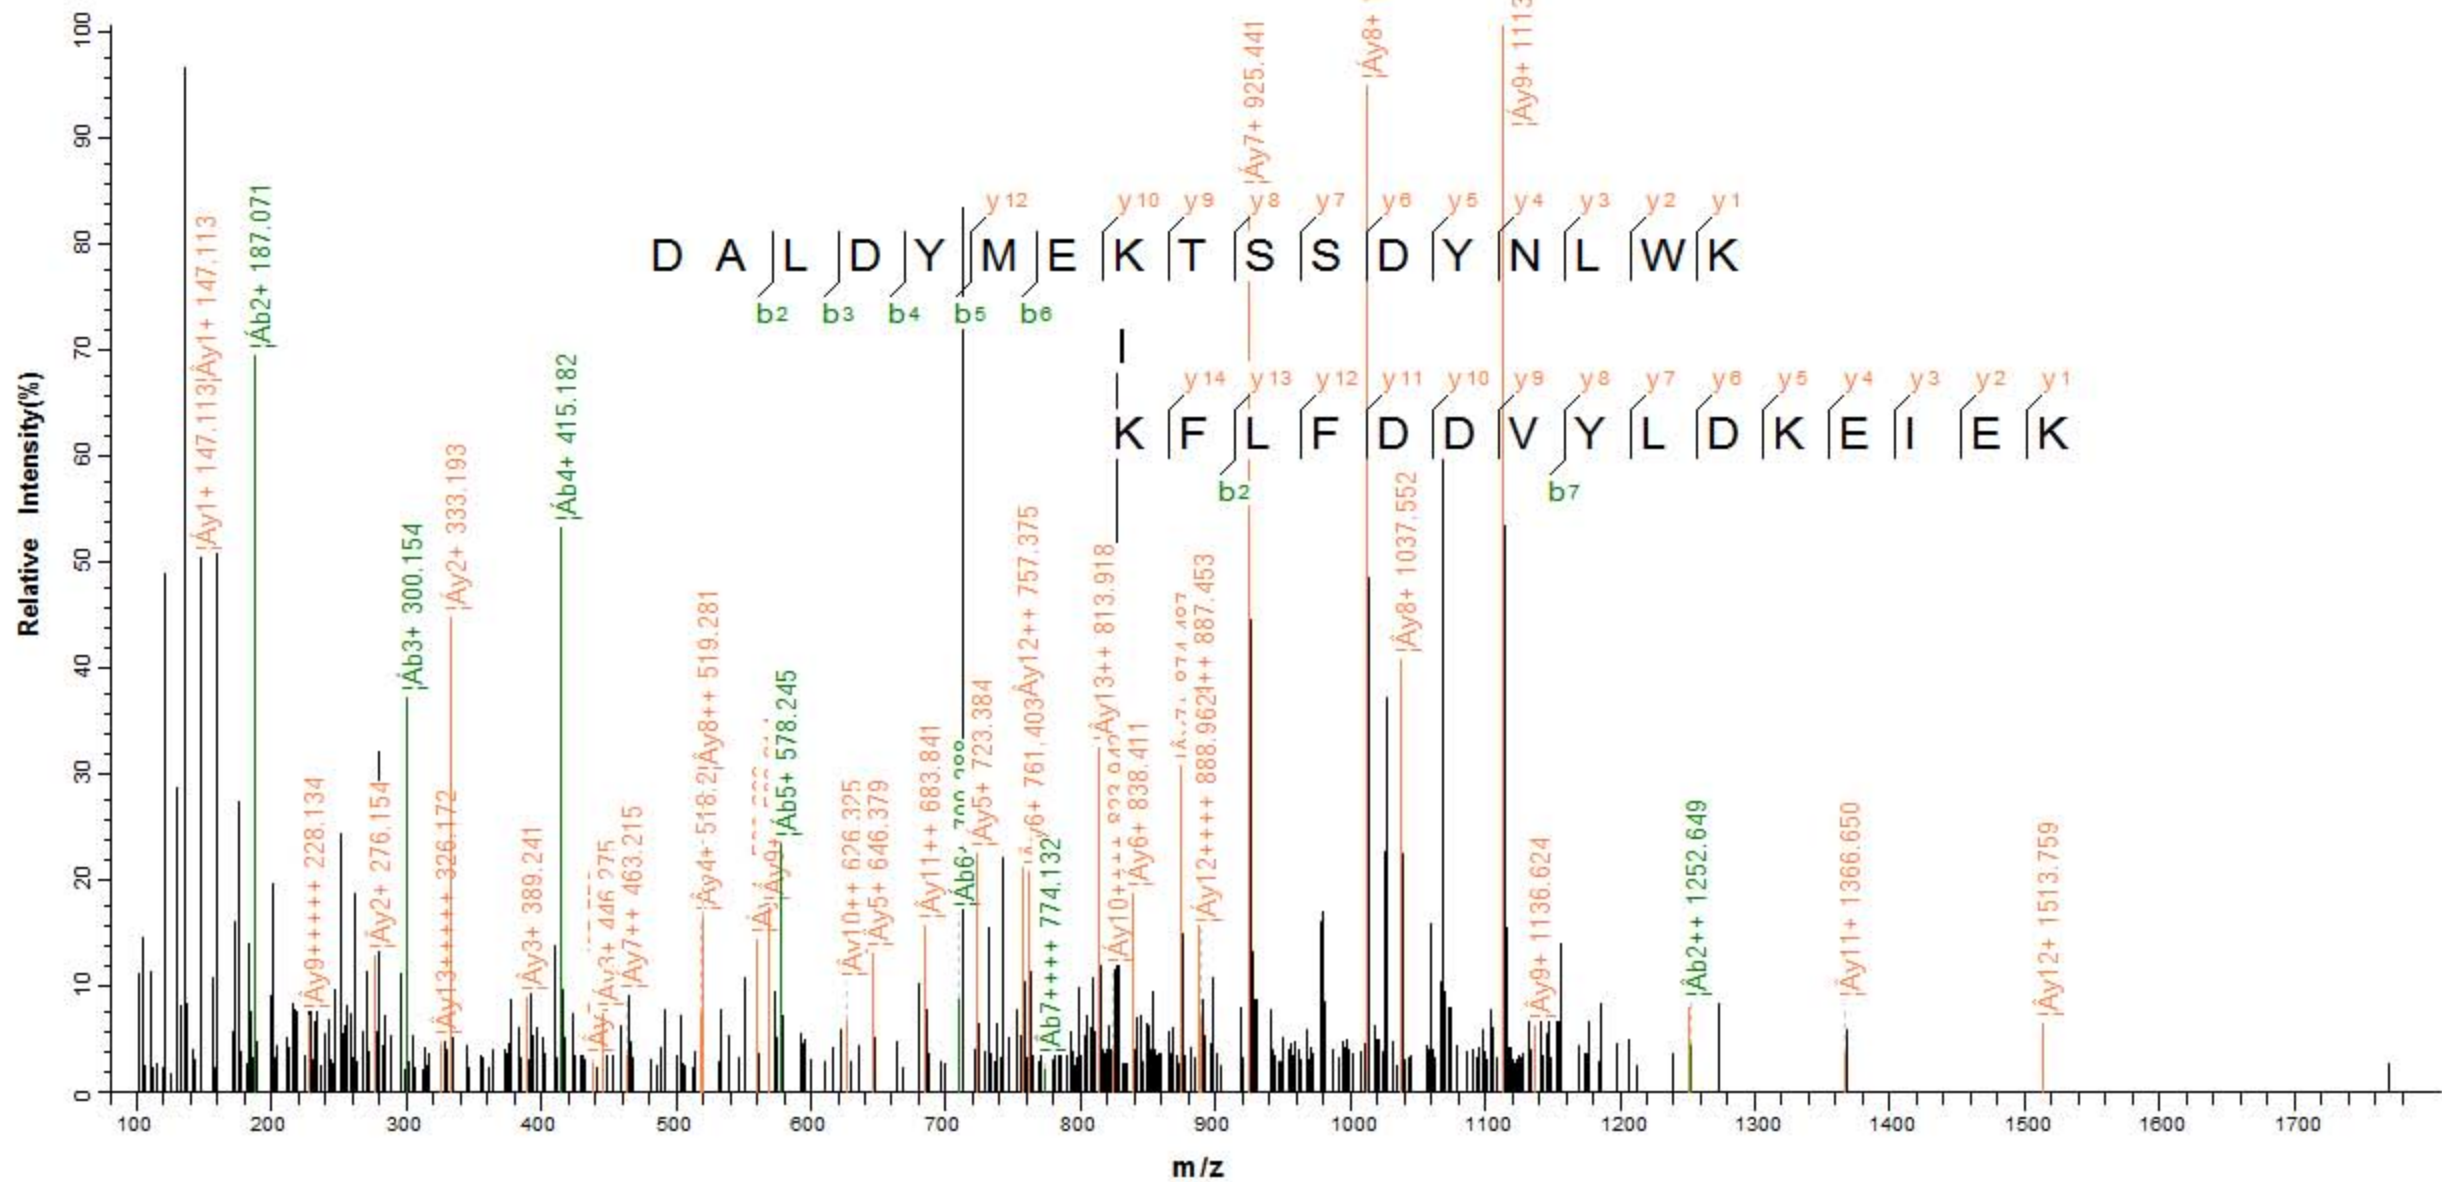

1.0e+005

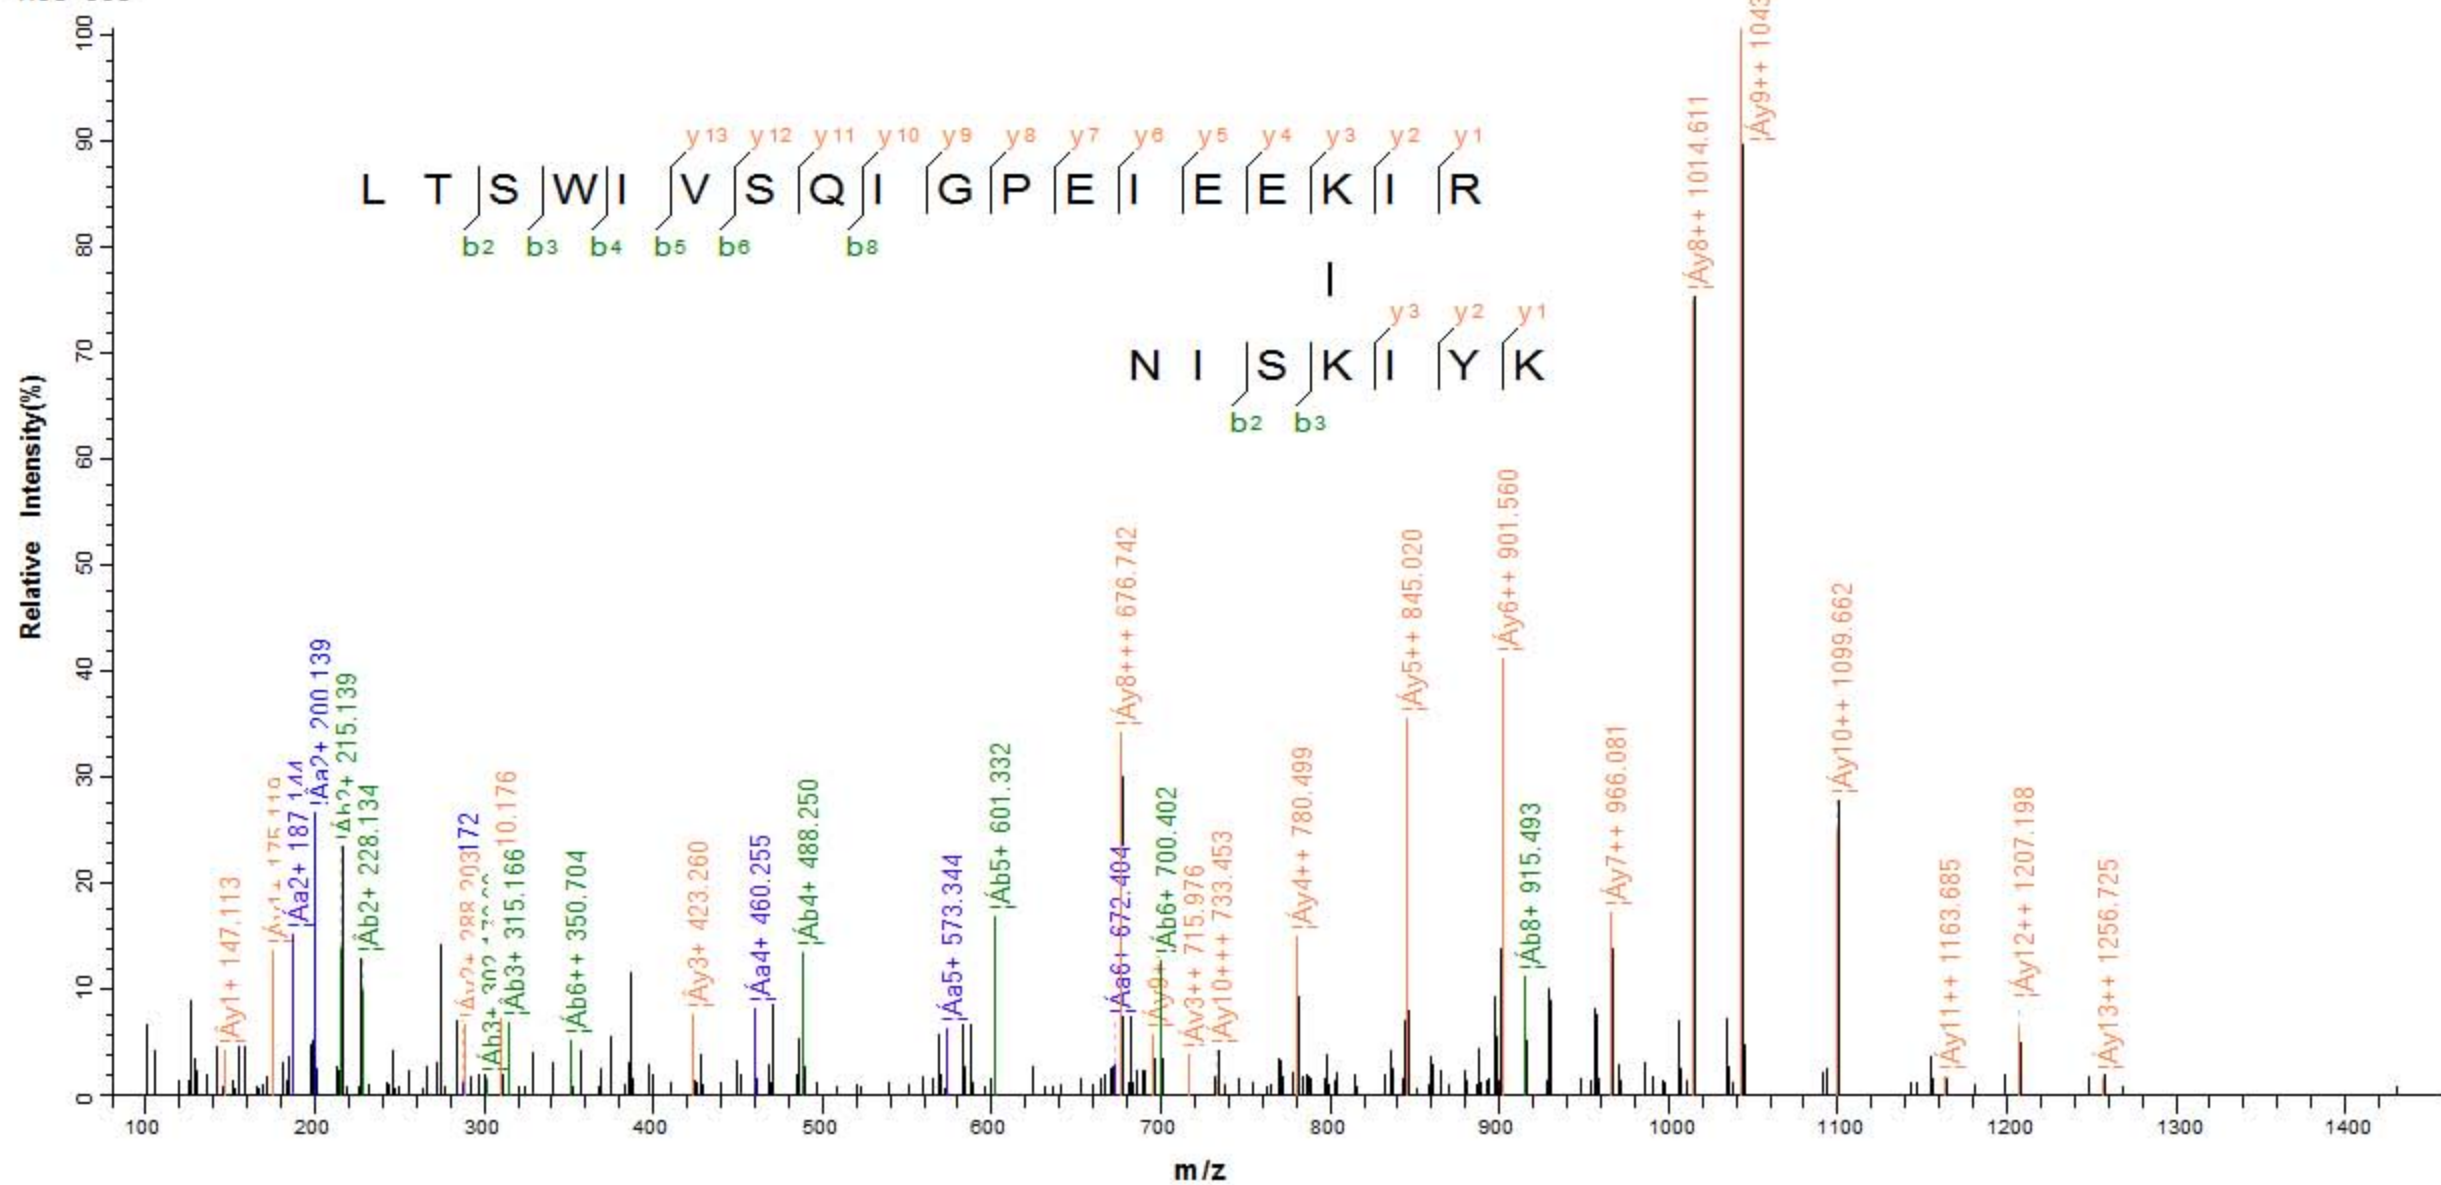

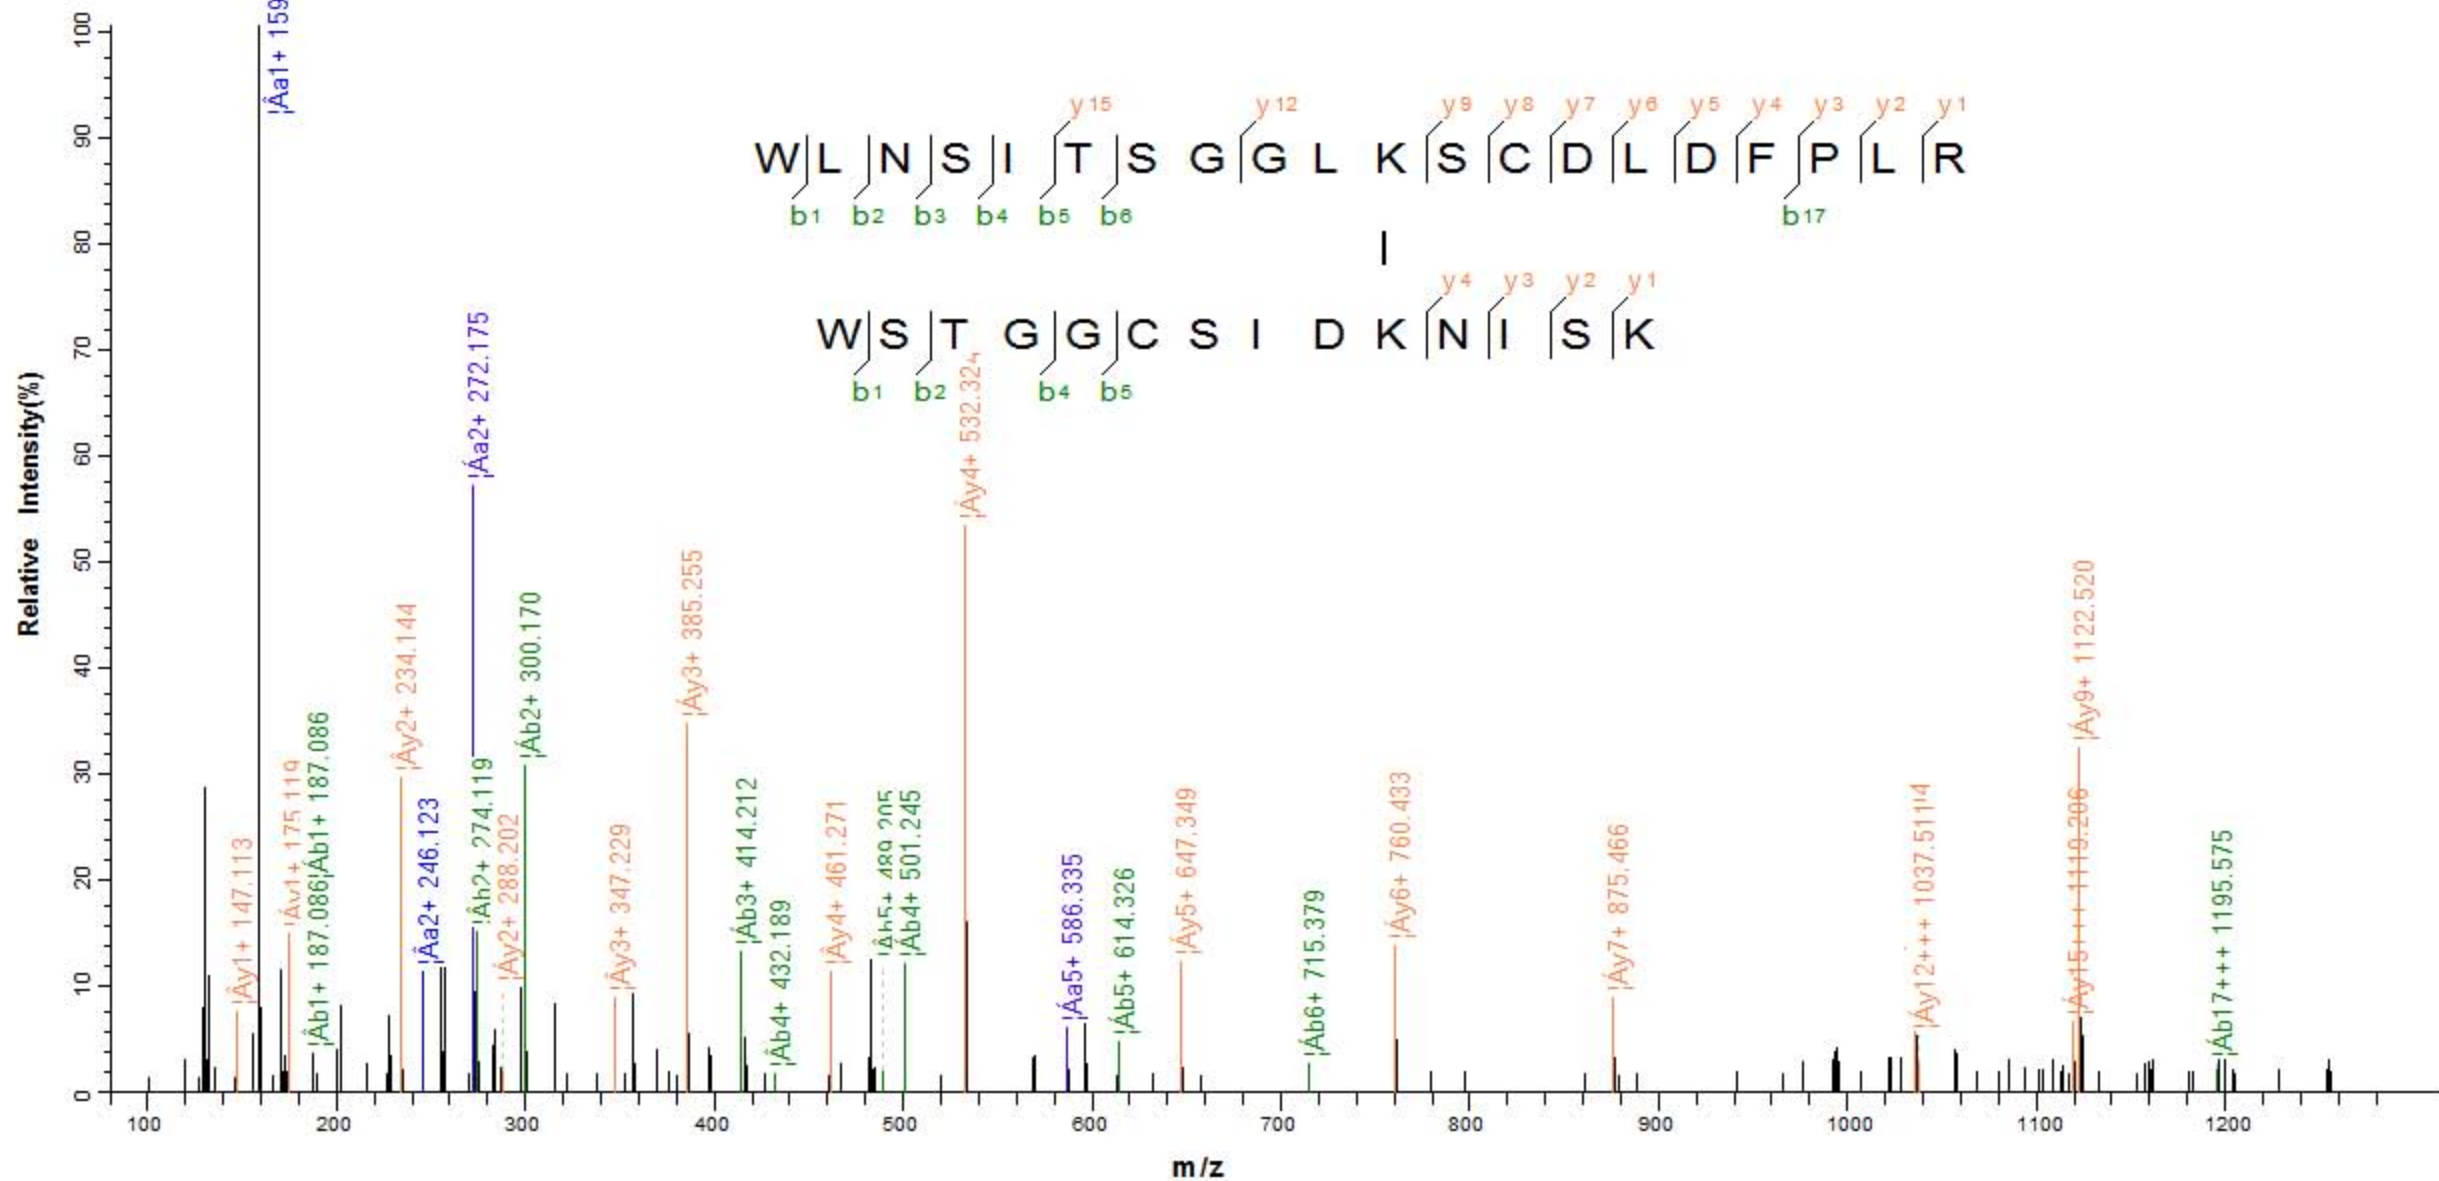



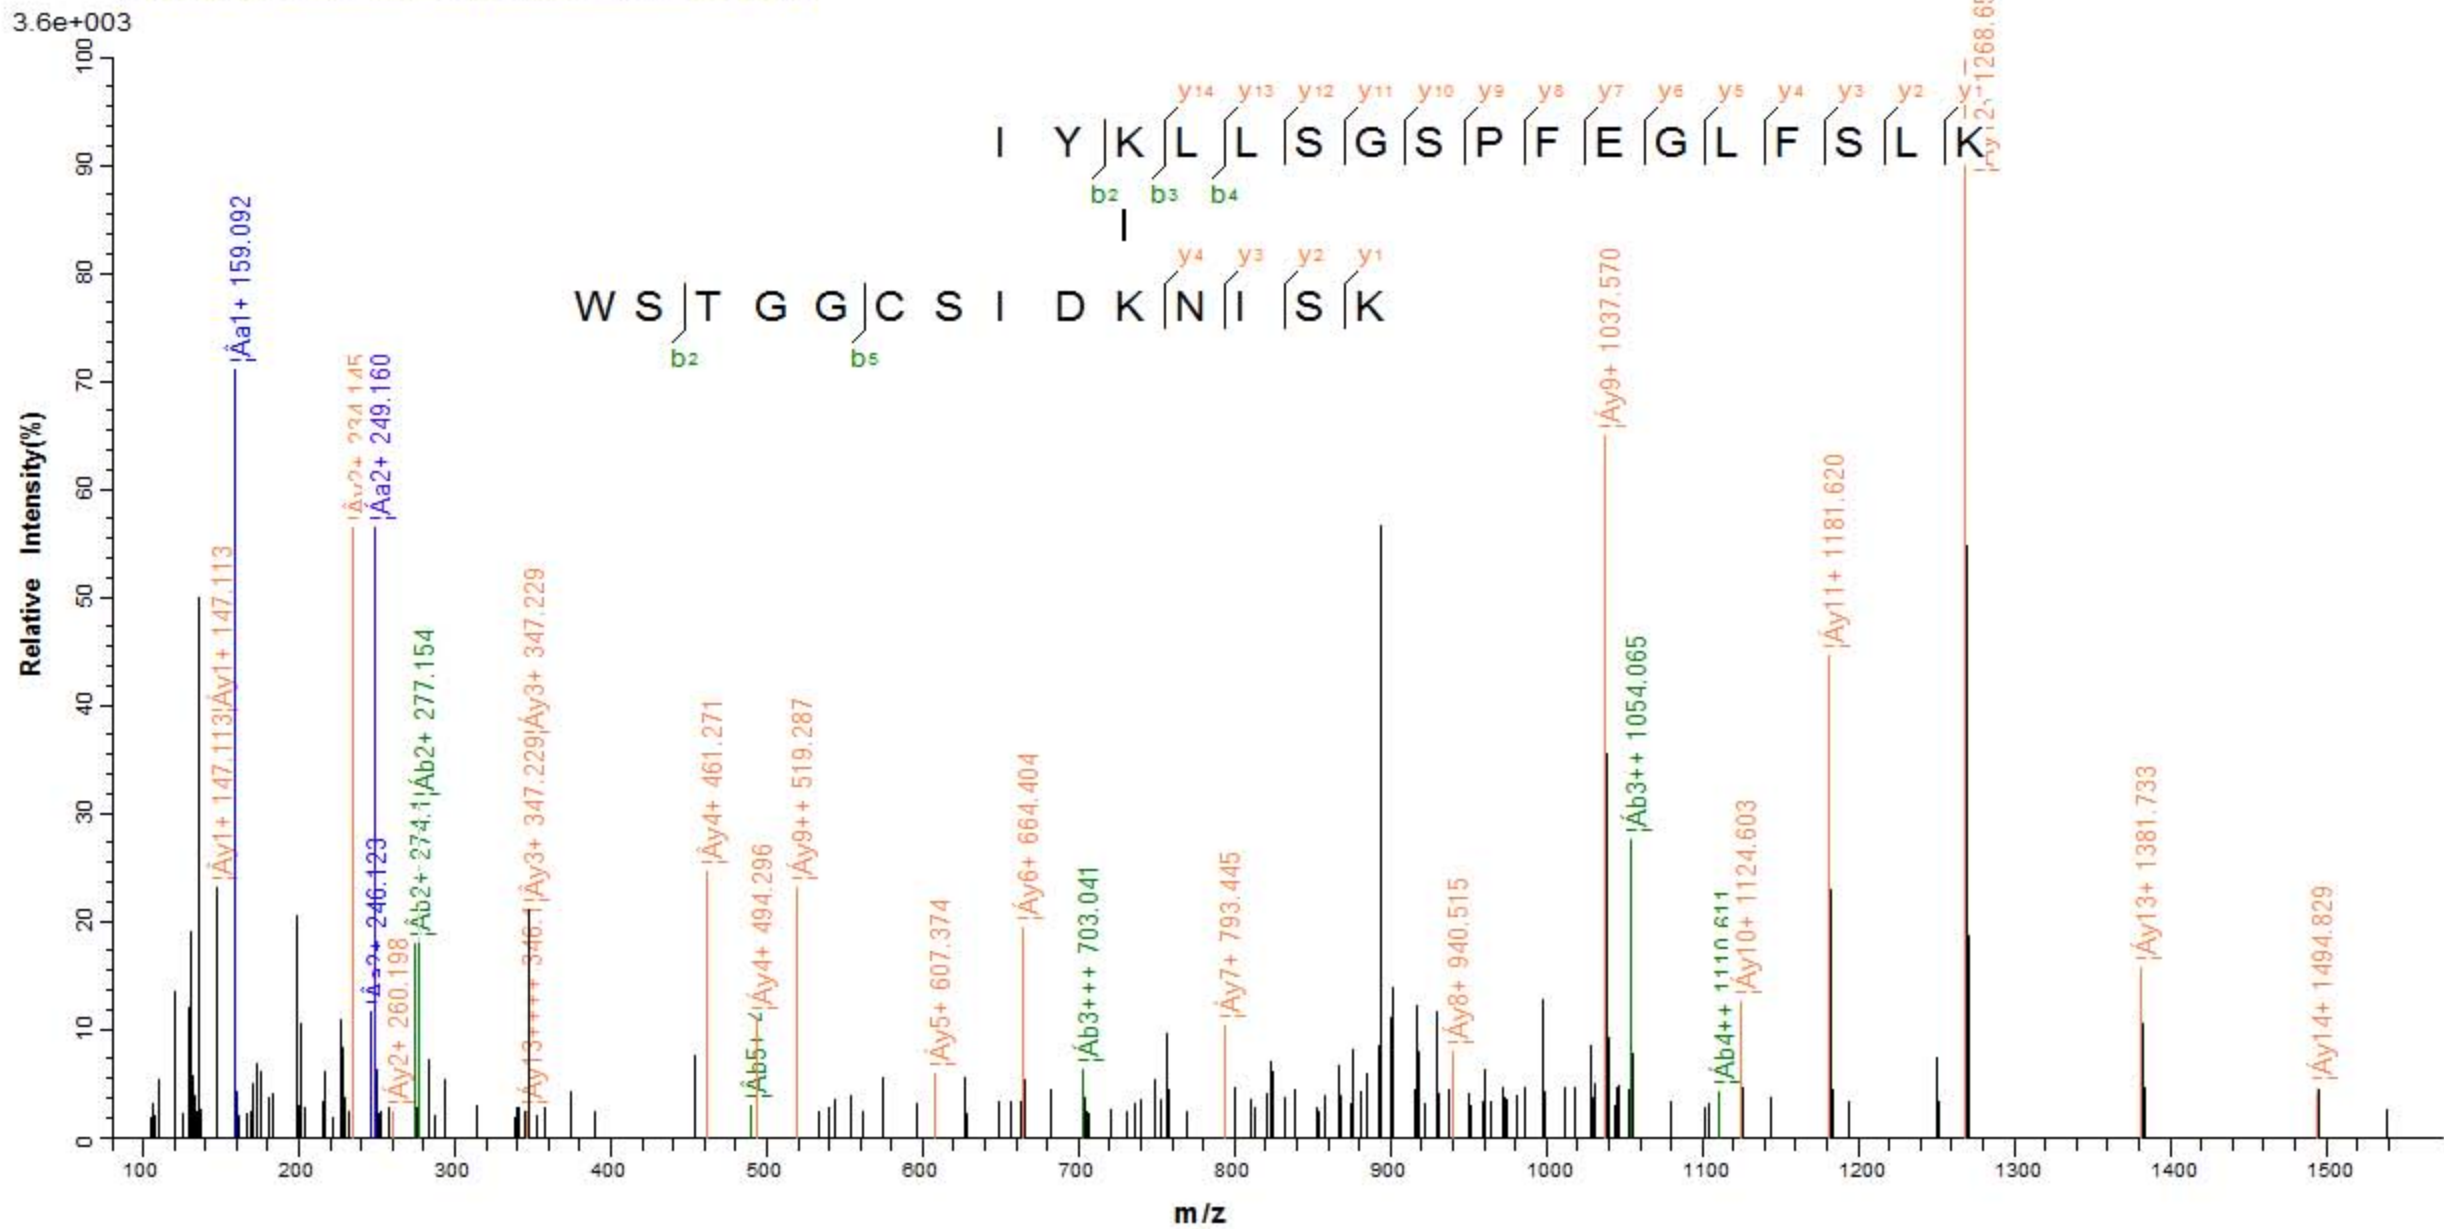

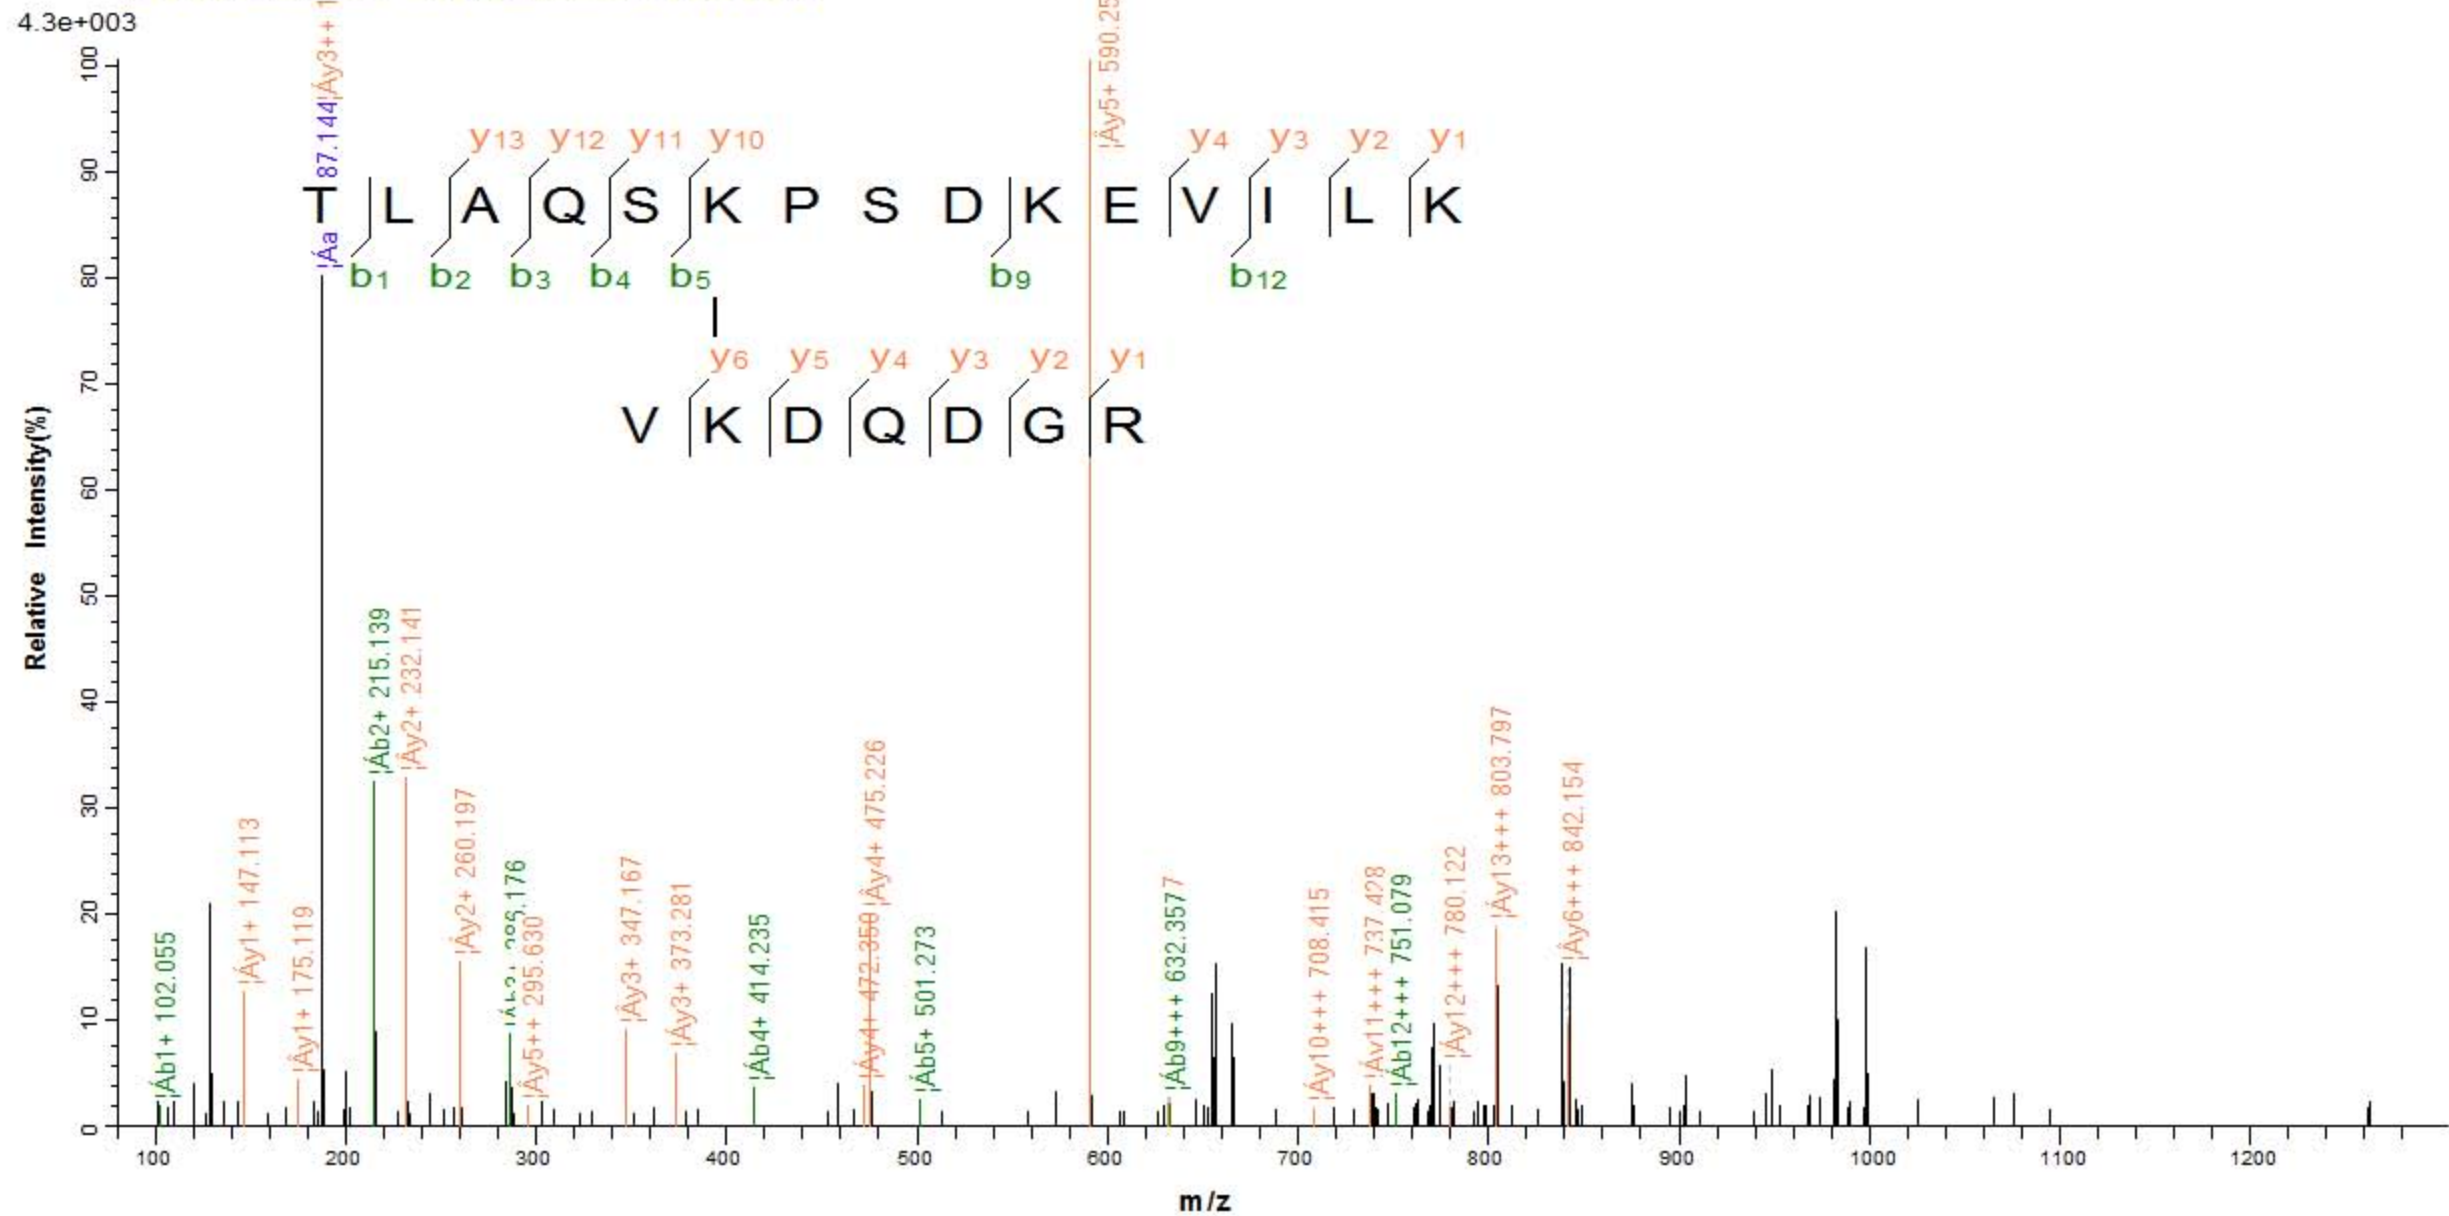

1.7e+004

Relative Intensity(%)

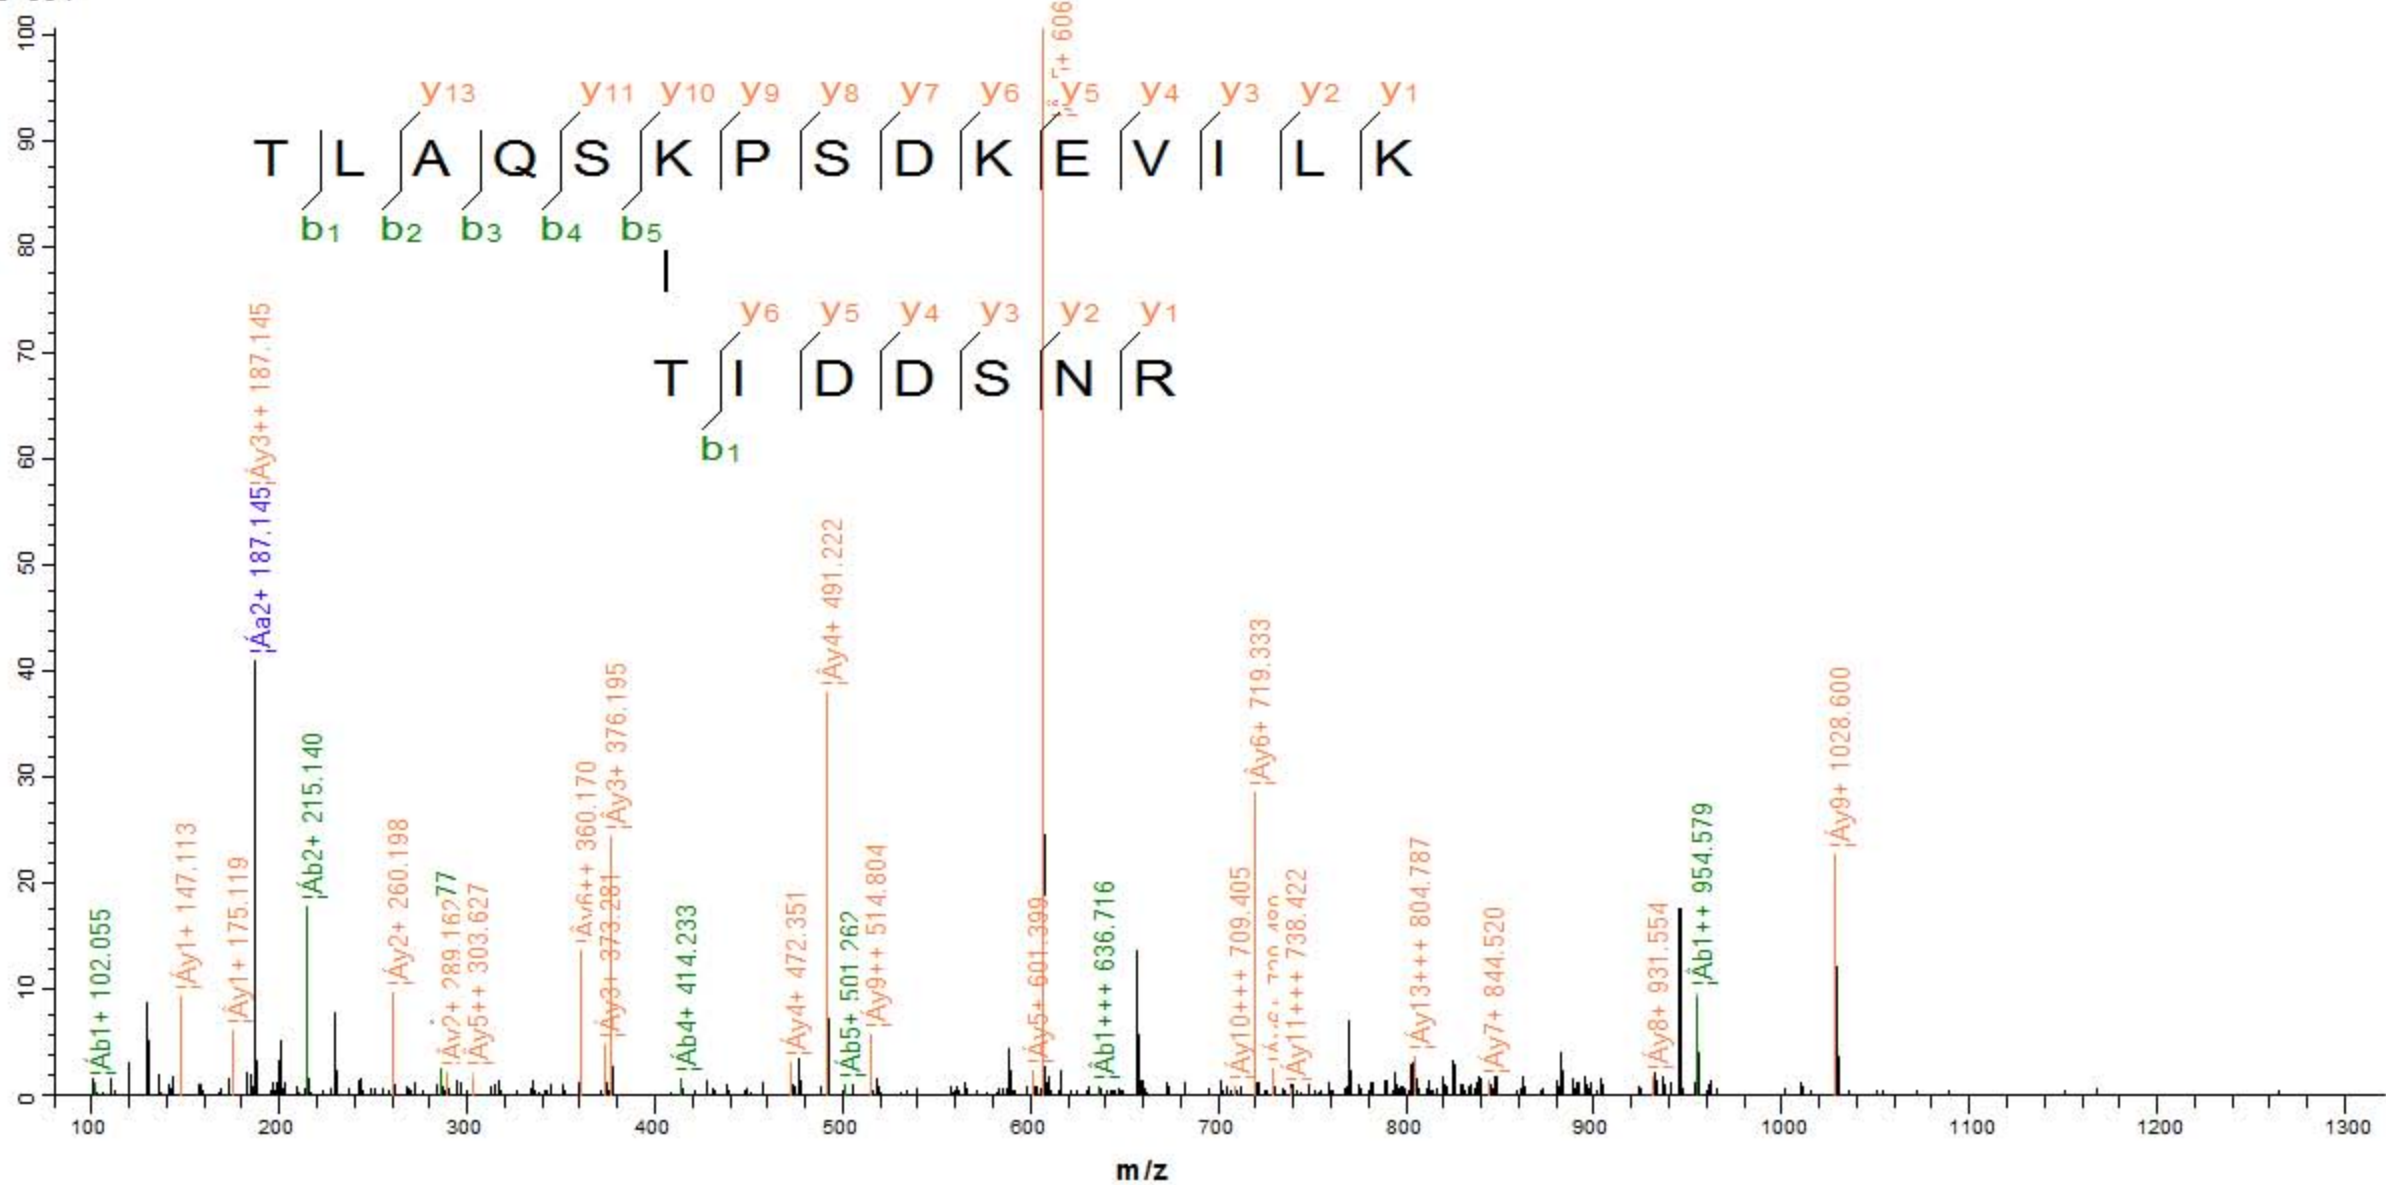

2.3e+004

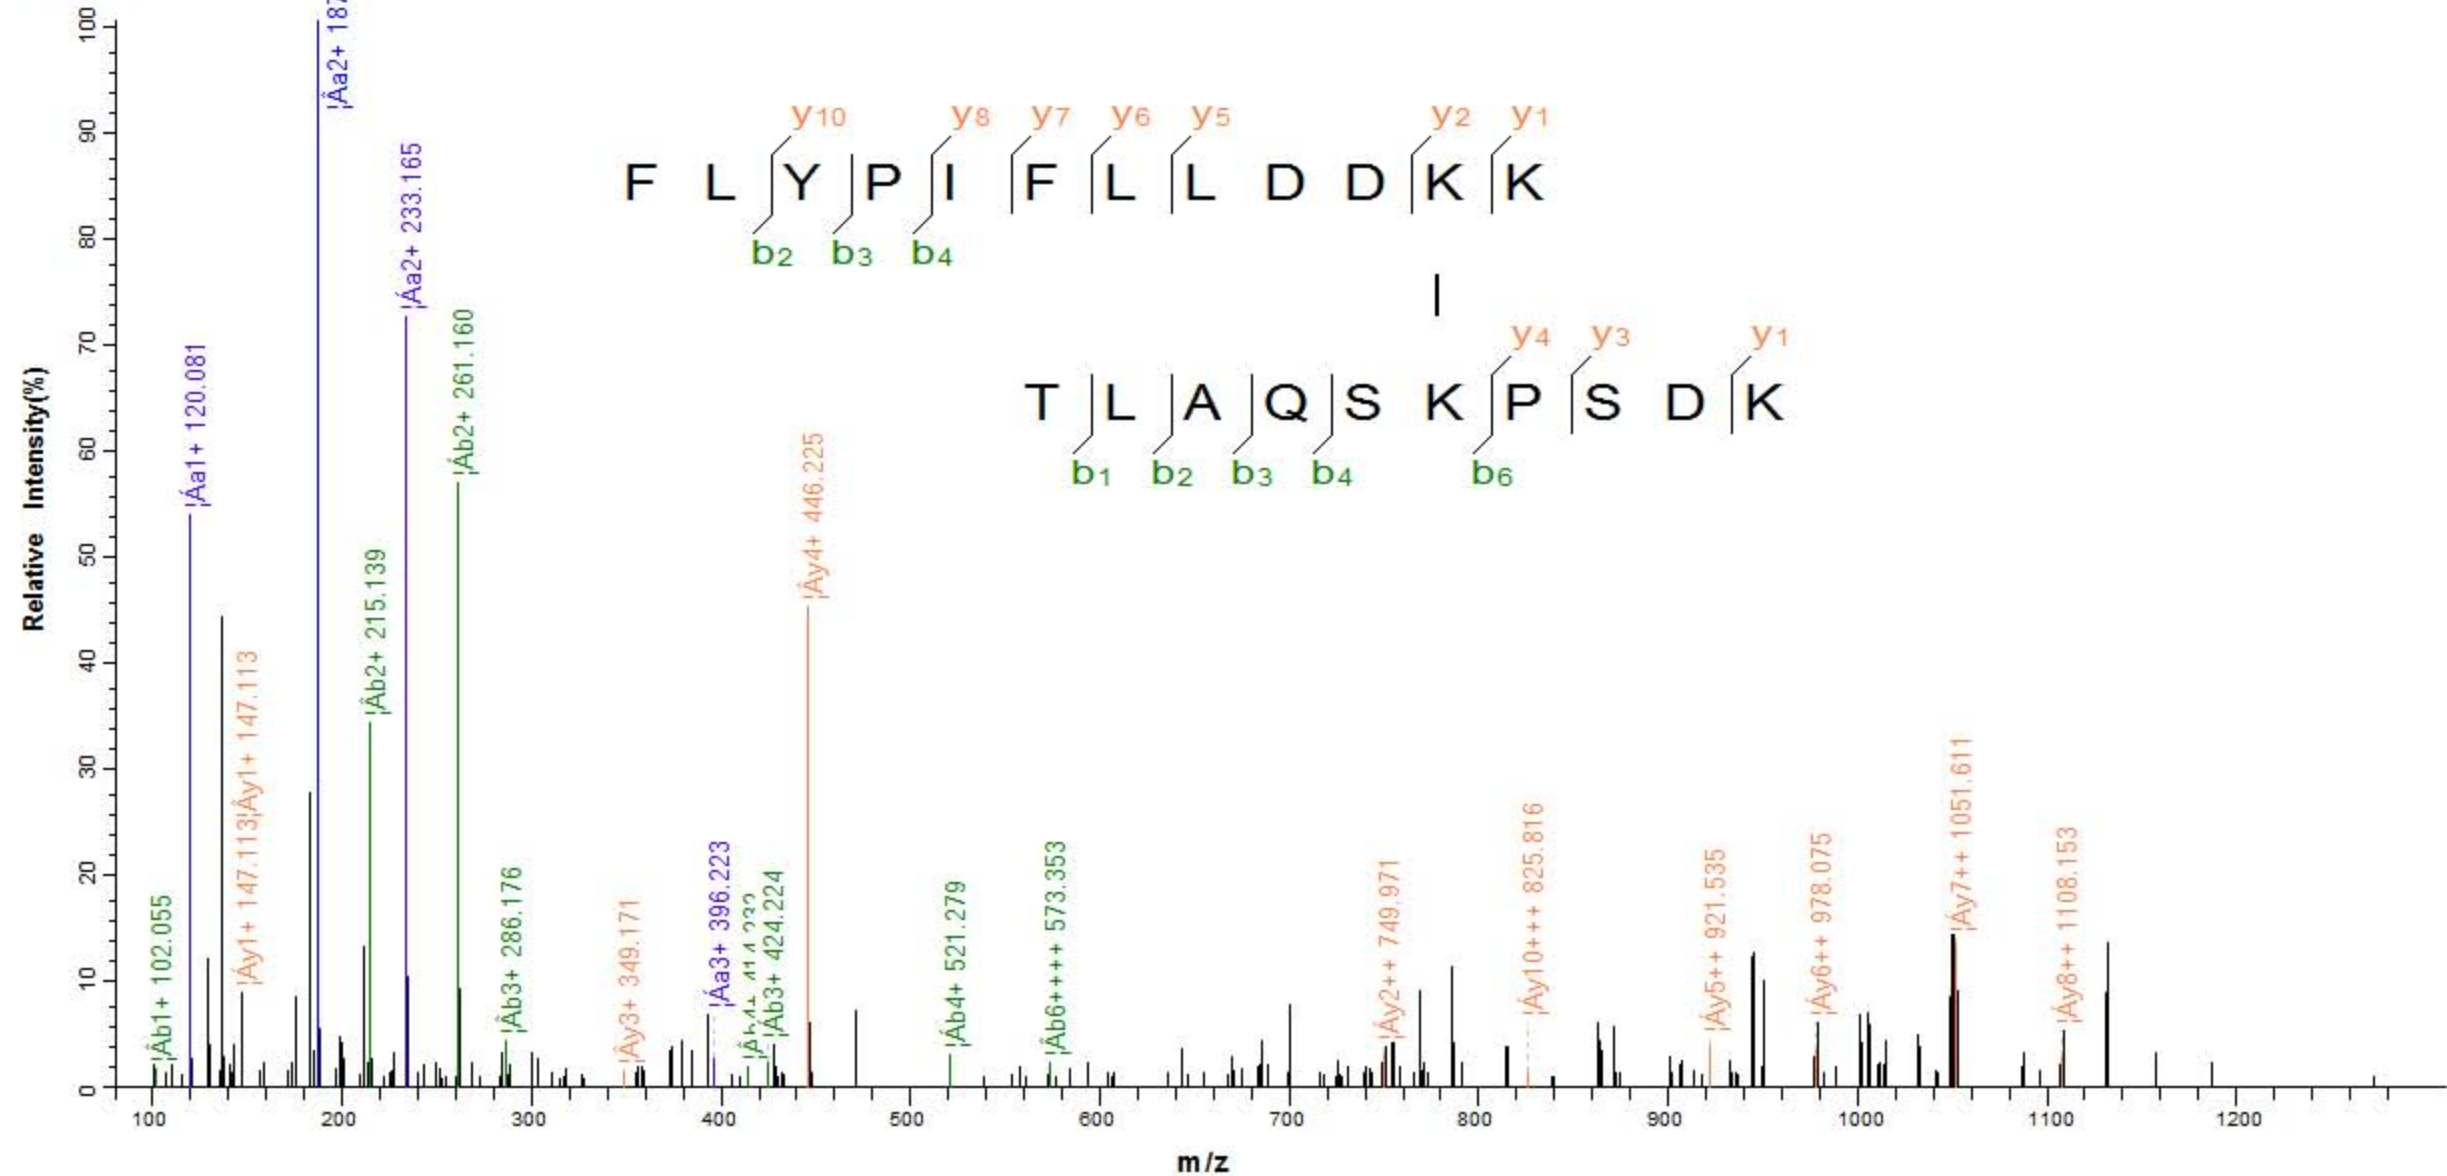

4.8e+003

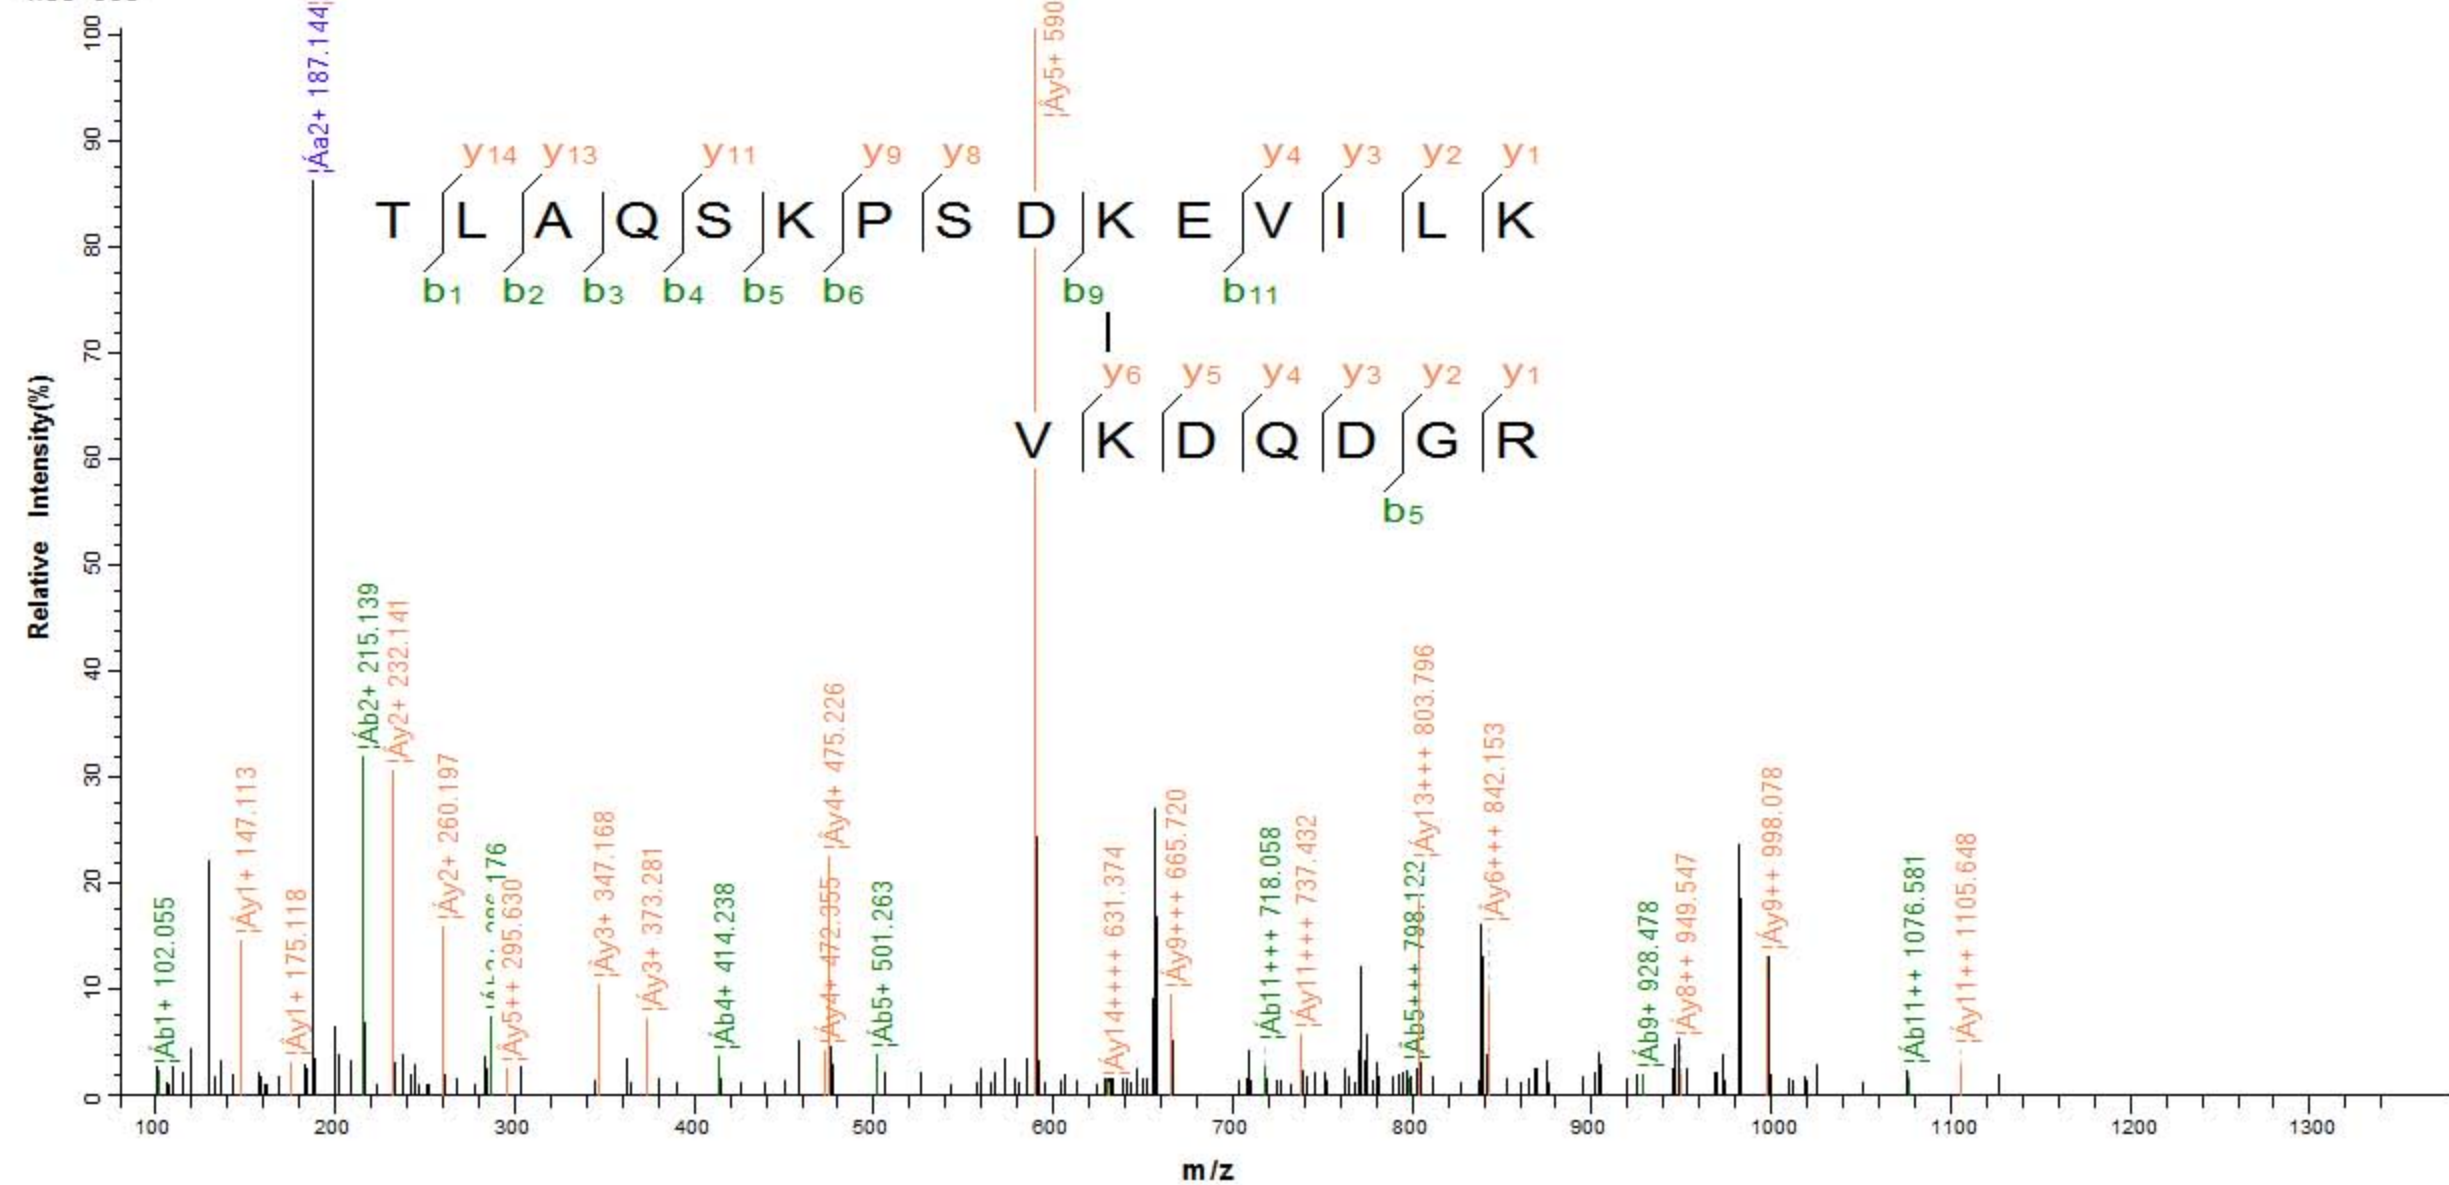

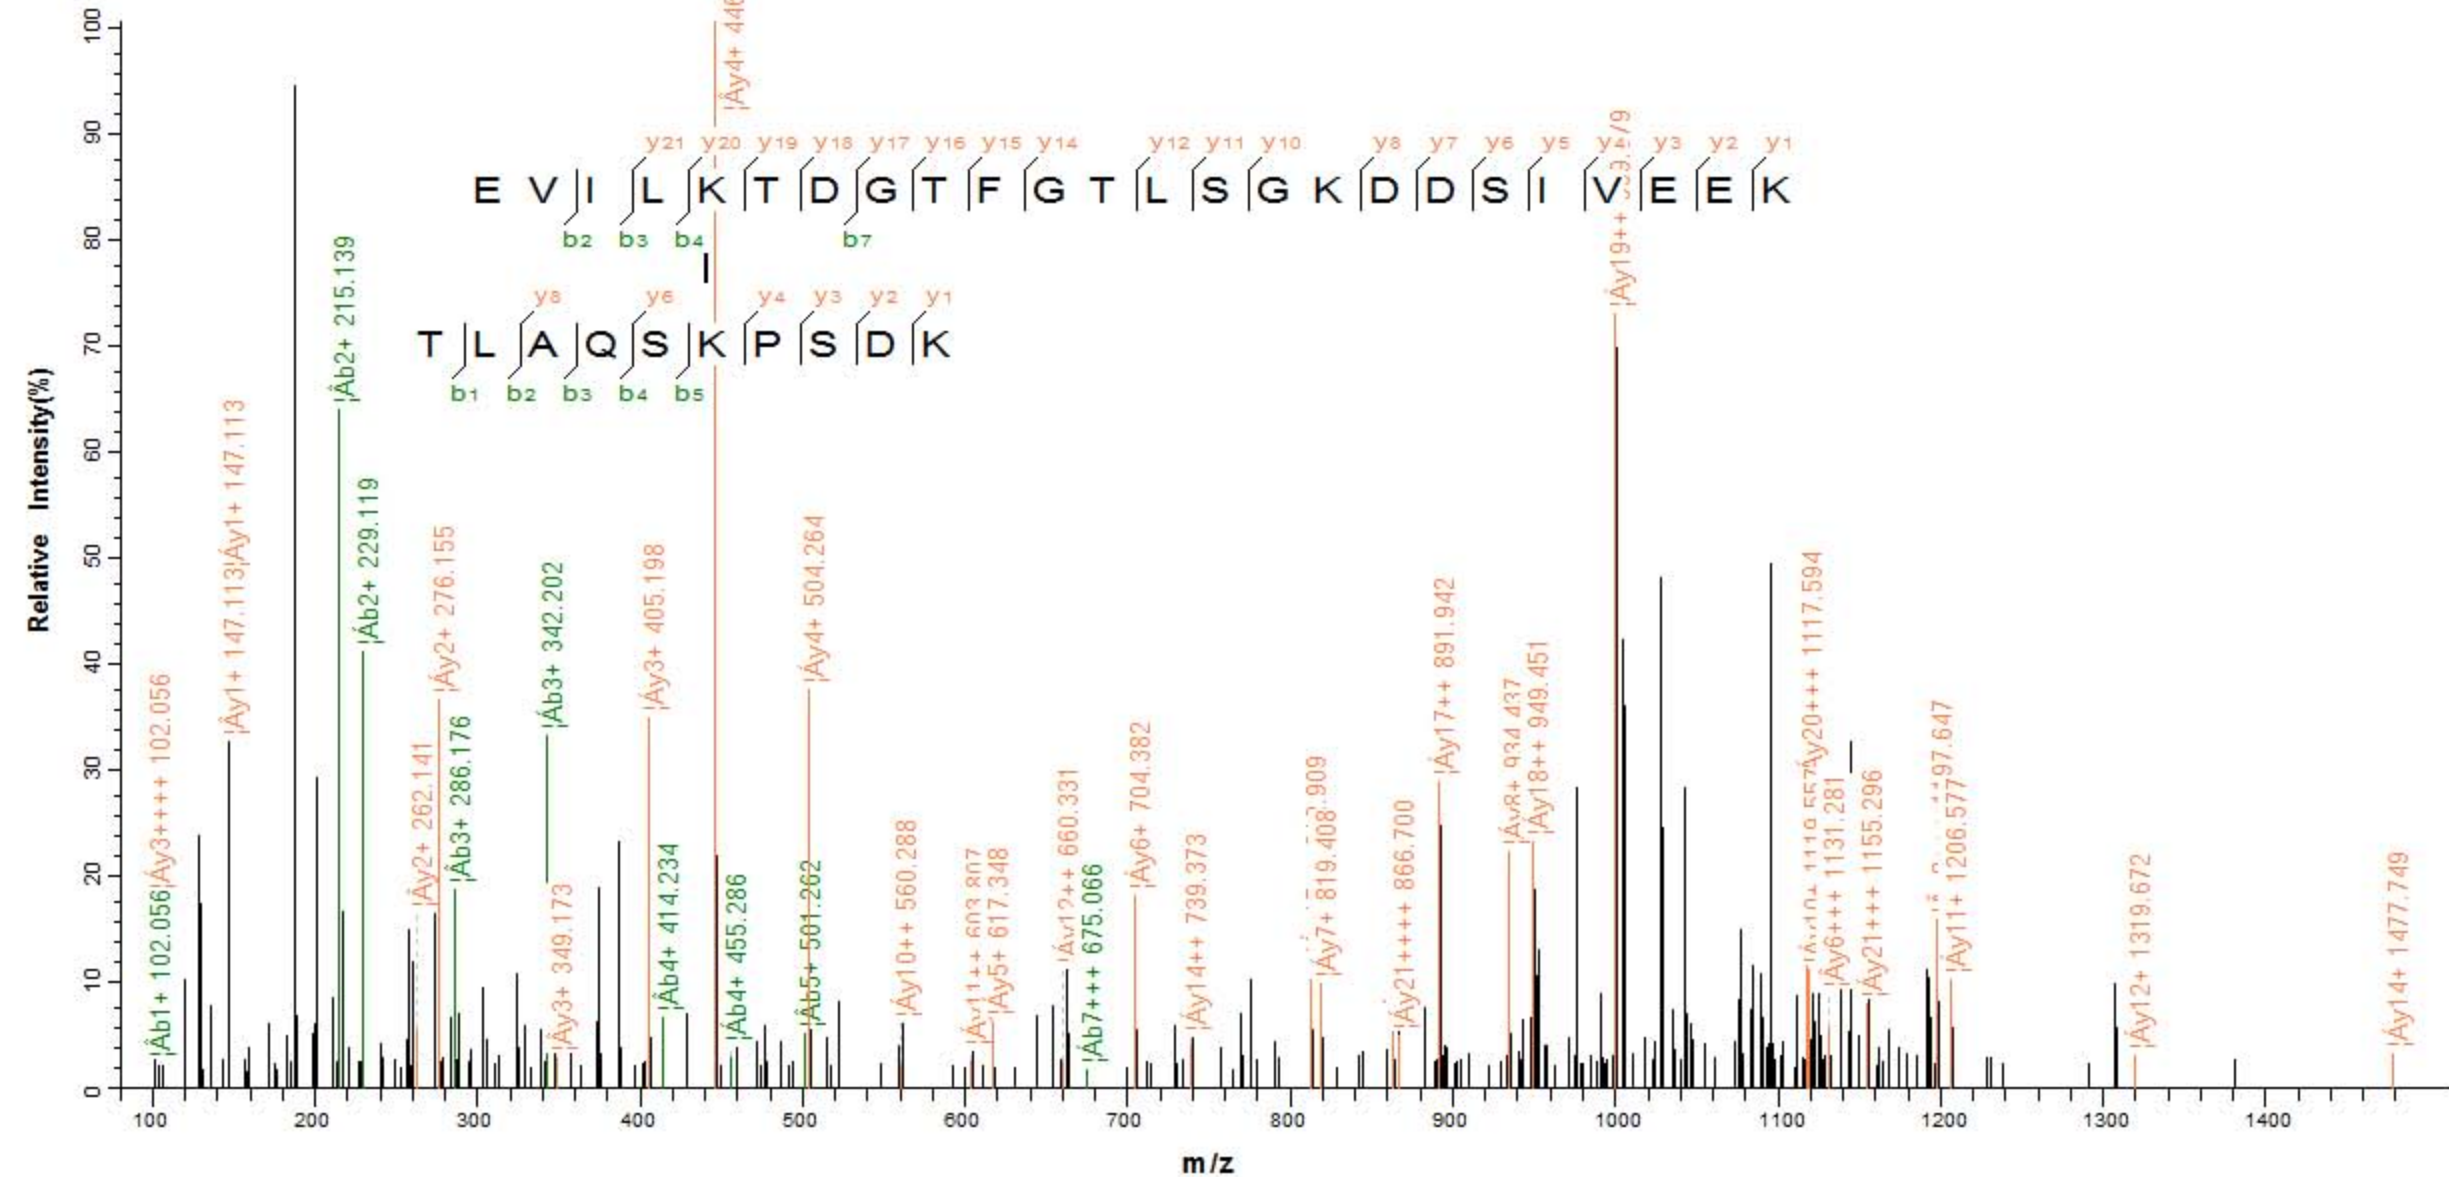

5.3e+004

Relative Intensity(%)

T D | G | T | F | G | T | L | S | G | K | D | D | S | I | V | E | E | K  
 b<sub>2</sub> b<sub>3</sub> b<sub>4</sub> b<sub>5</sub> b<sub>6</sub> b<sub>7</sub> b<sub>8</sub> b<sub>11</sub> y<sub>12</sub> y<sub>11</sub> y<sub>10</sub> y<sub>8</sub> y<sub>7</sub> y<sub>6</sub> y<sub>5</sub> y<sub>4</sub> y<sub>3</sub> y<sub>2</sub> y<sub>1</sub>

T L | A | Q | S | K | P | S | D | K  
 b<sub>2</sub> b<sub>3</sub> b<sub>4</sub> b<sub>5</sub> y<sub>6</sub> y<sub>4</sub> y<sub>3</sub> y<sub>2</sub> y<sub>1</sub>

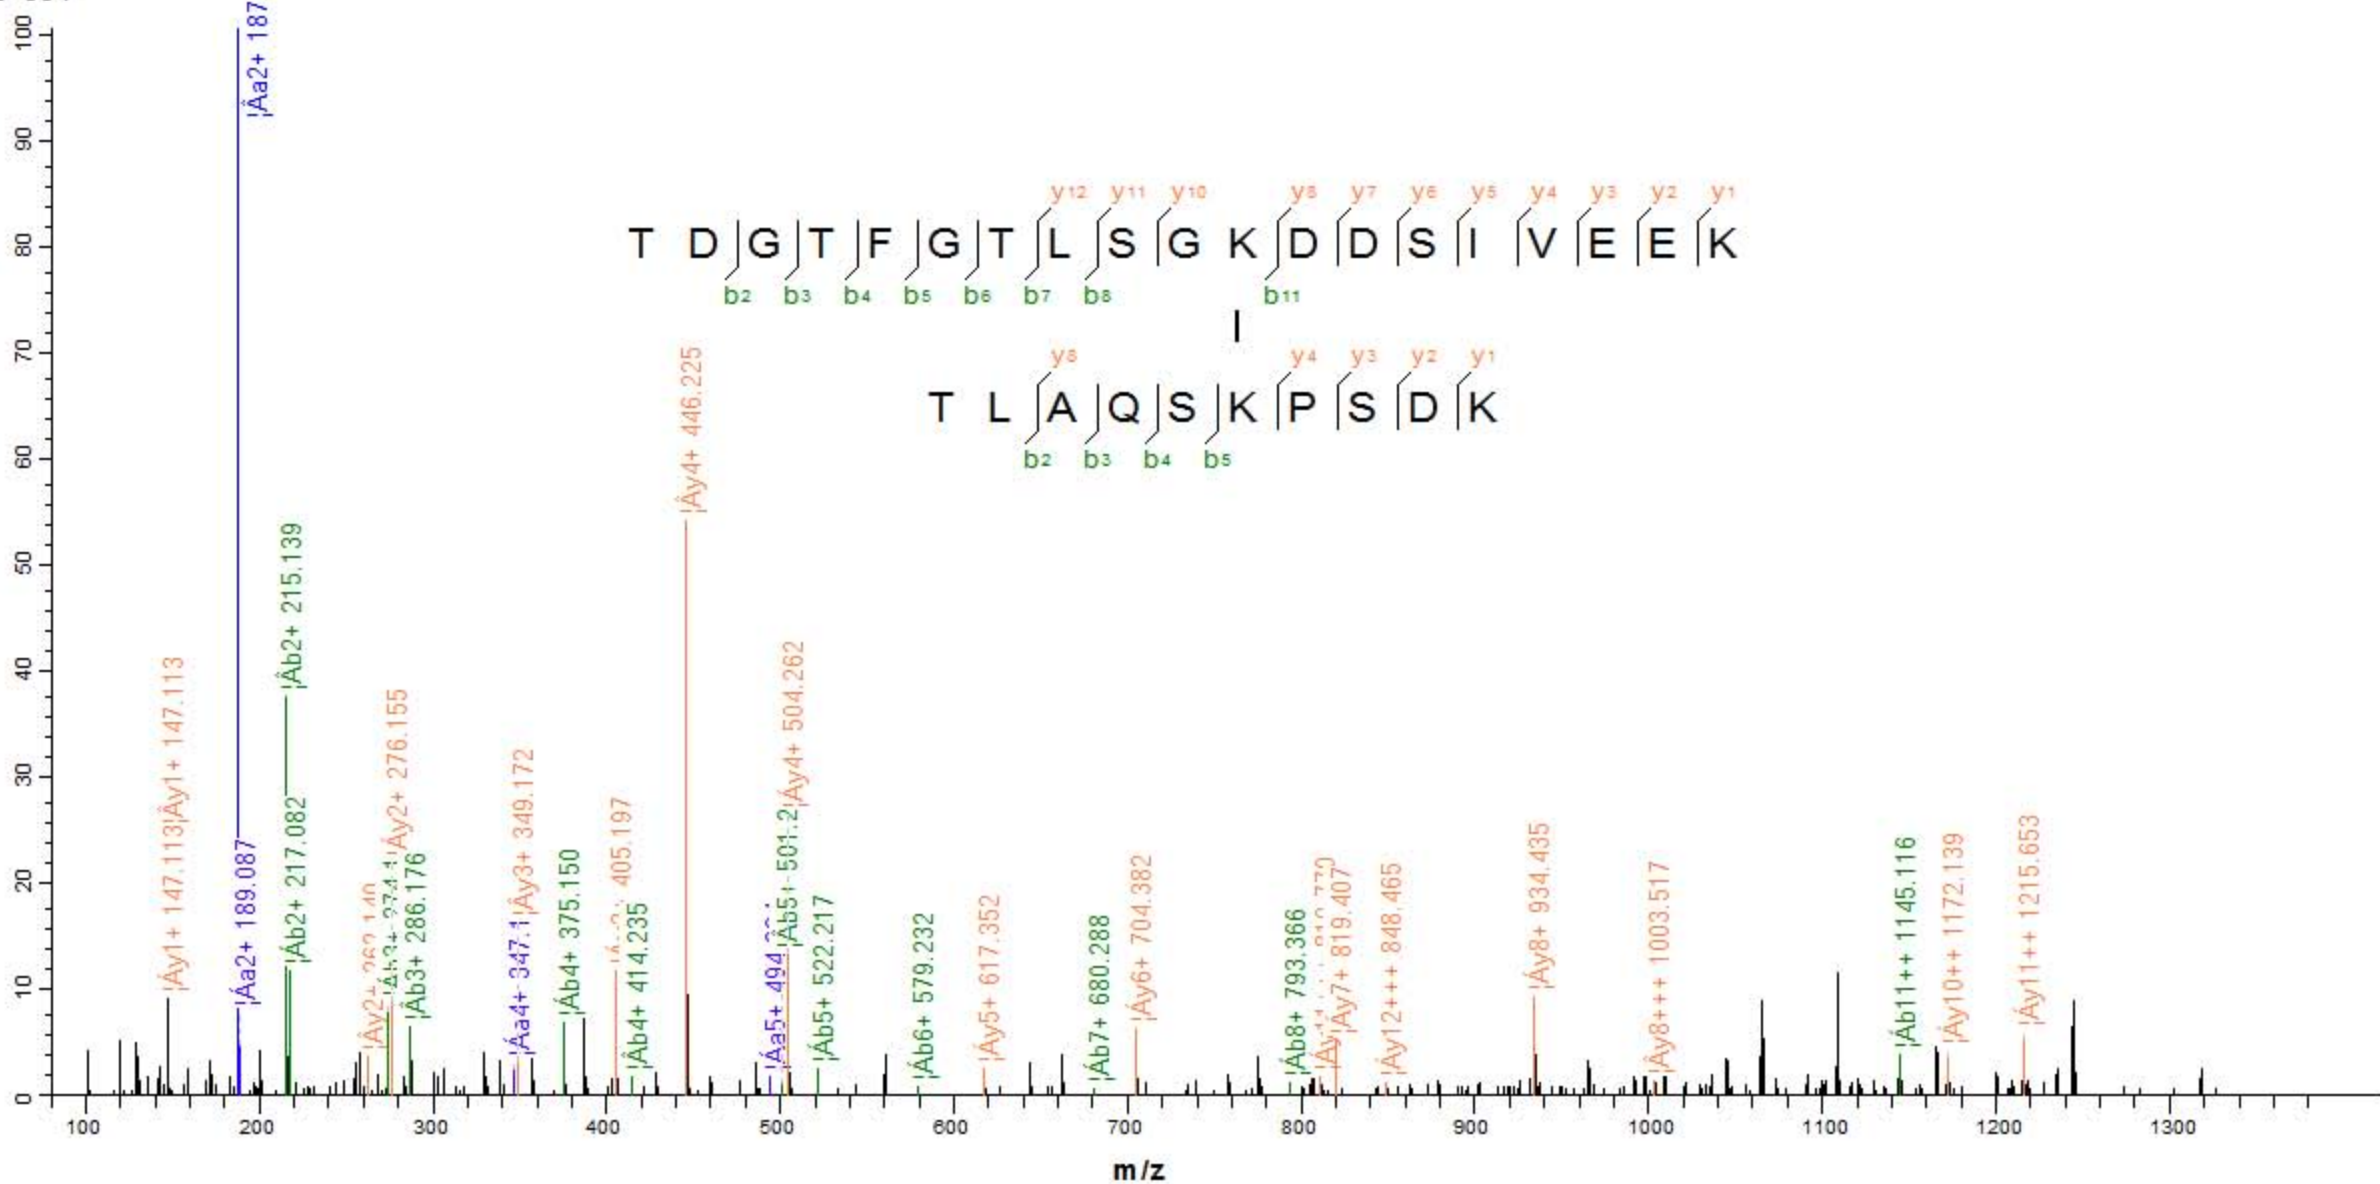

m/z

1.0e+004

Relative Intensity(%)

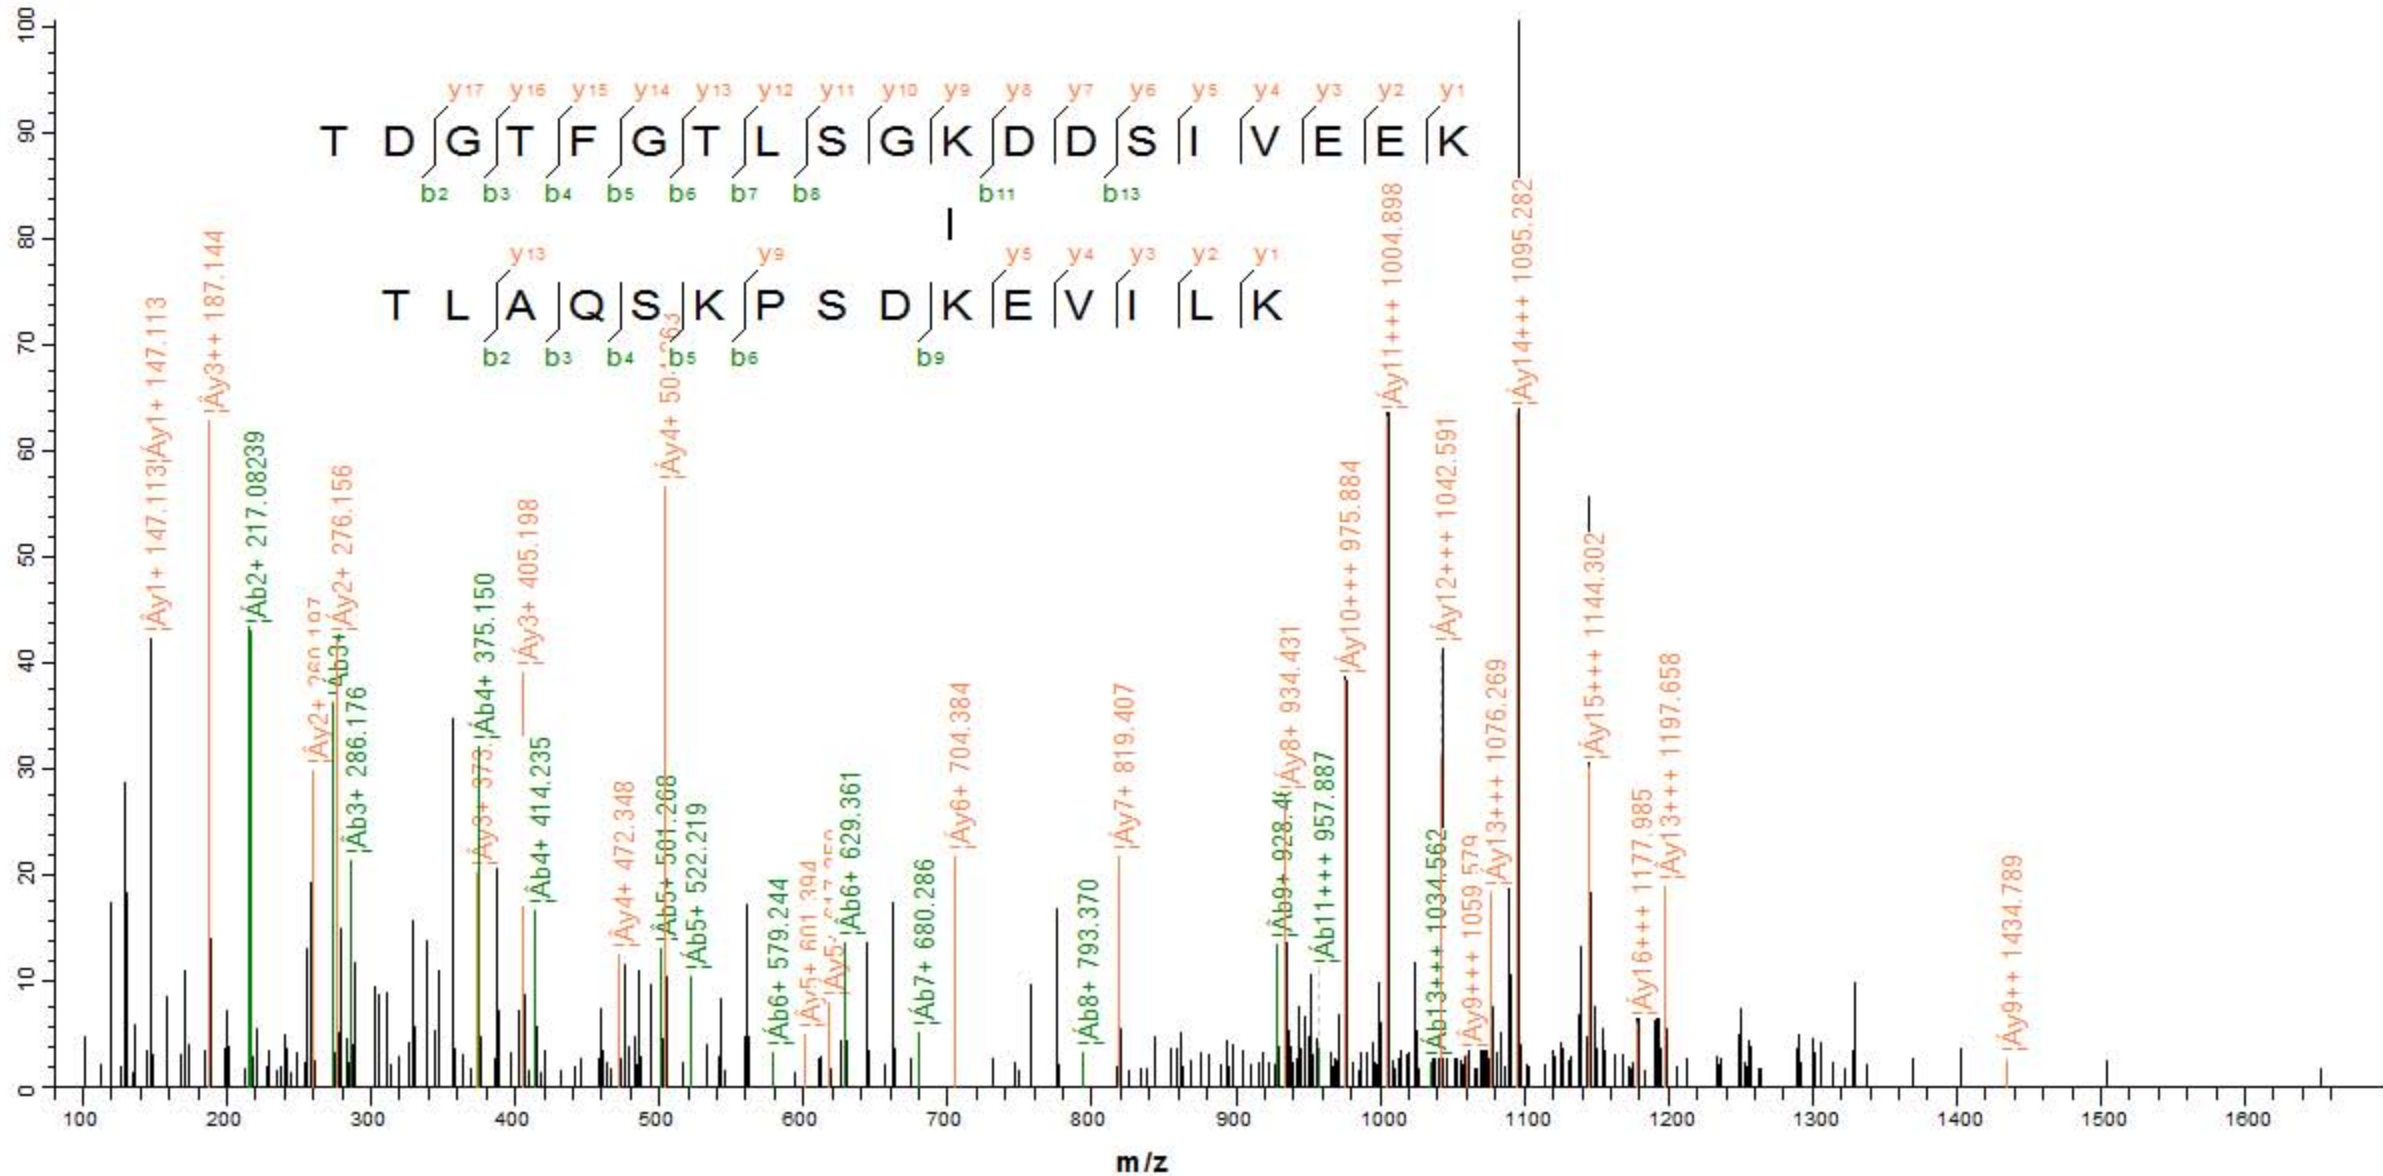



2.0e+004

Relative Intensity(%)

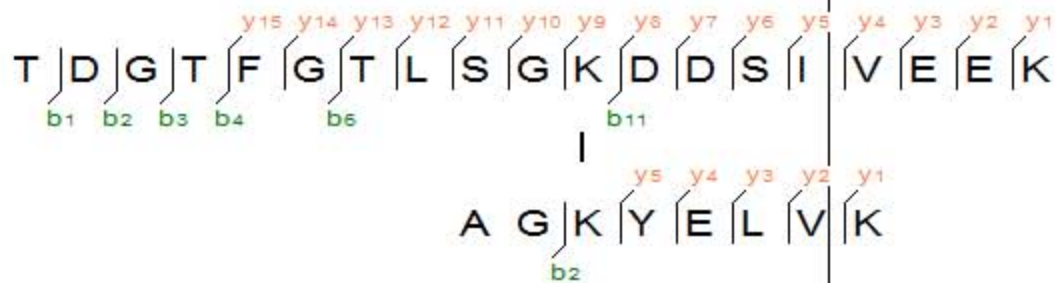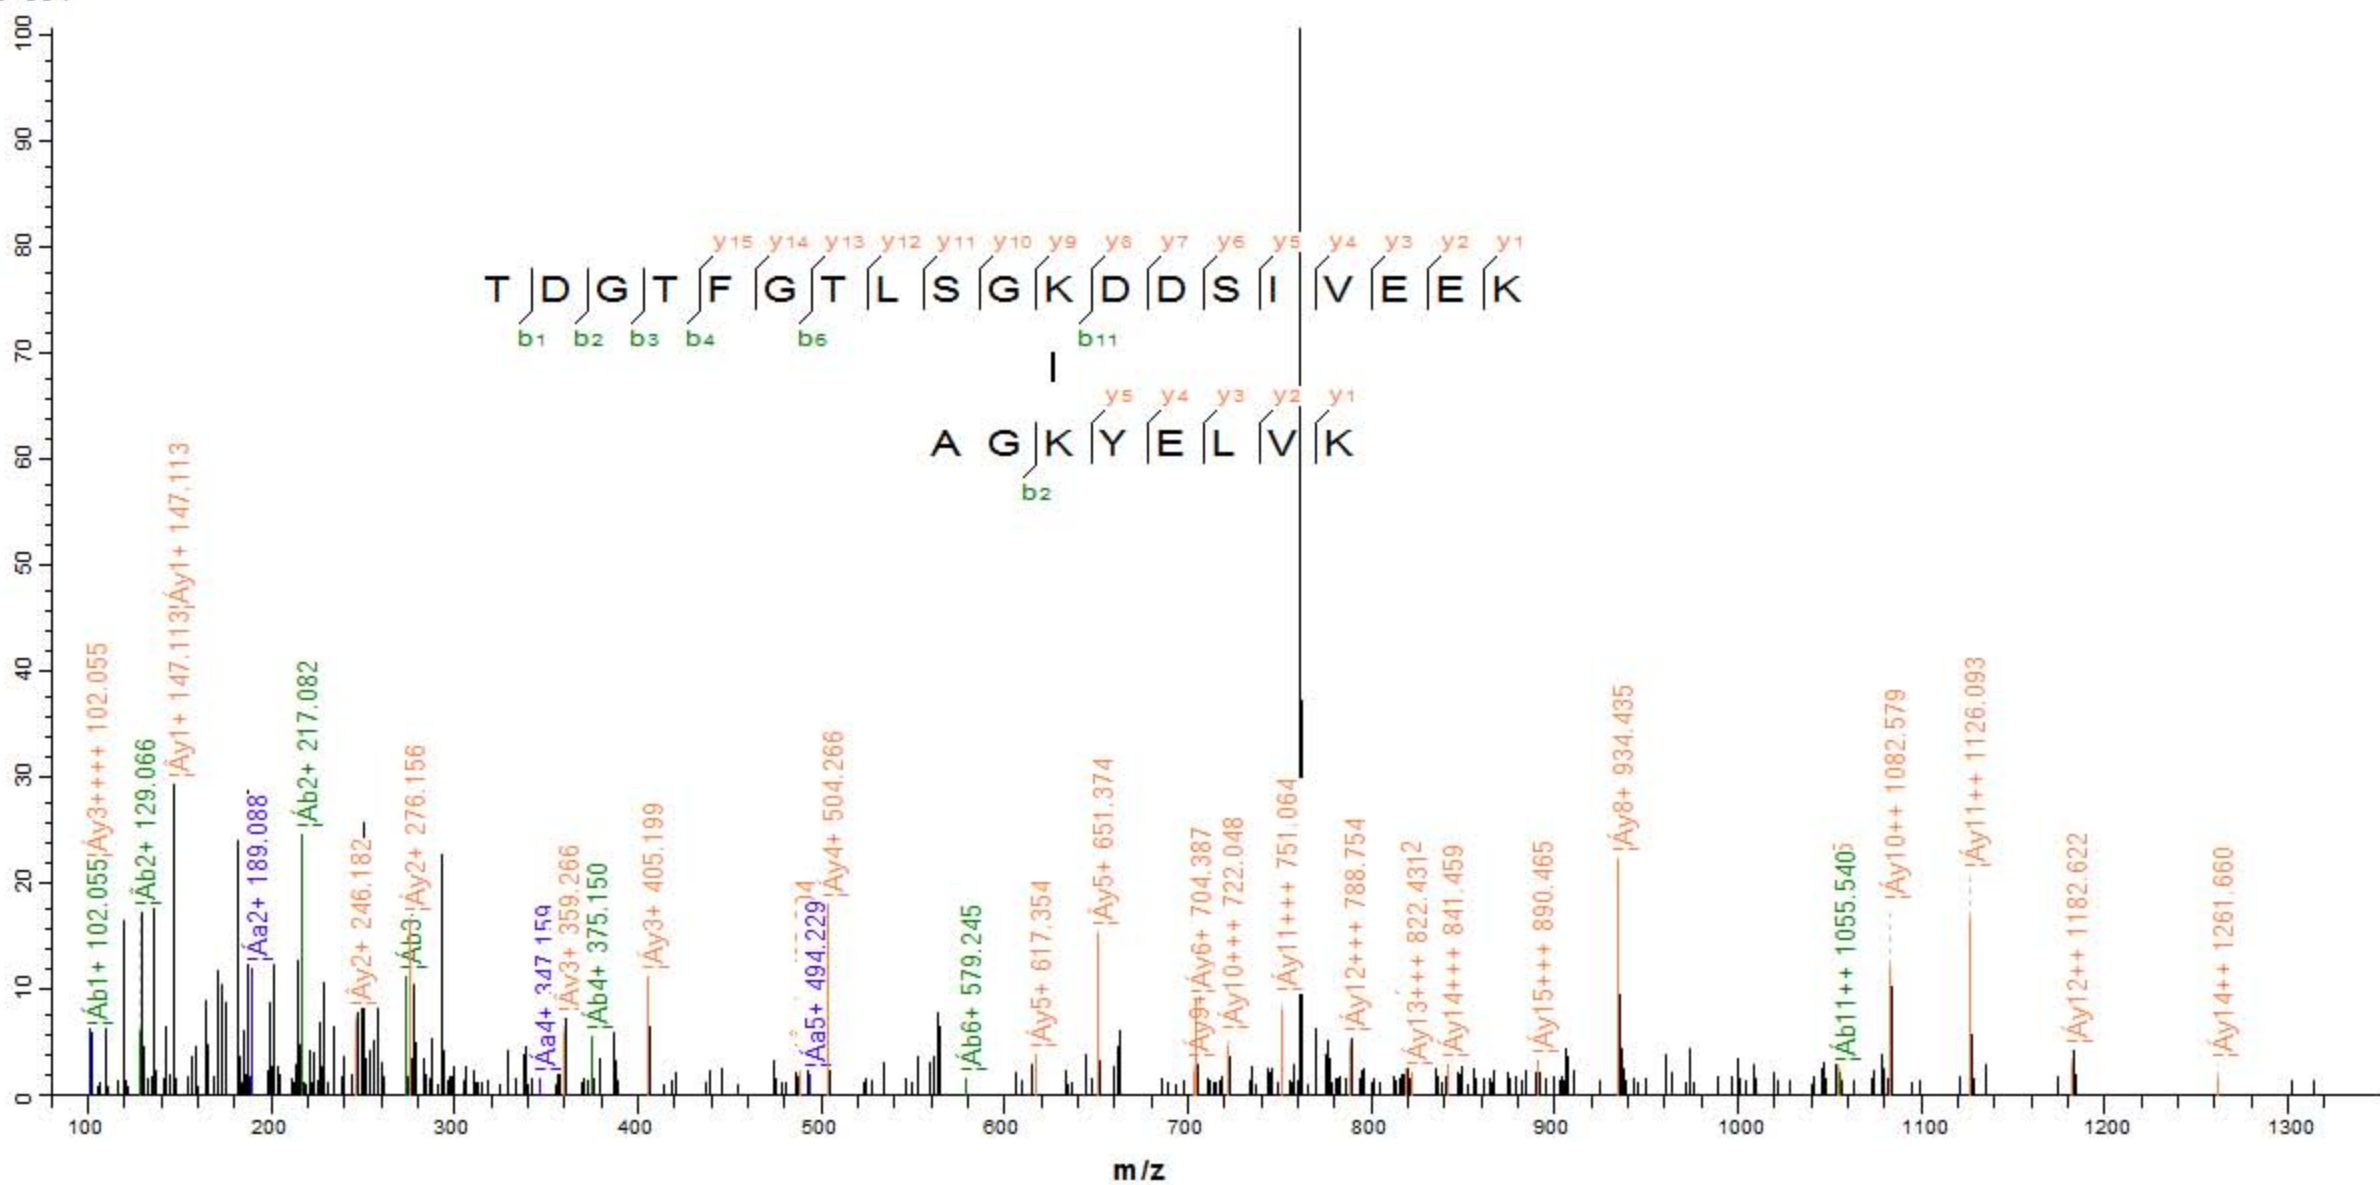

m/z

2.2e+004

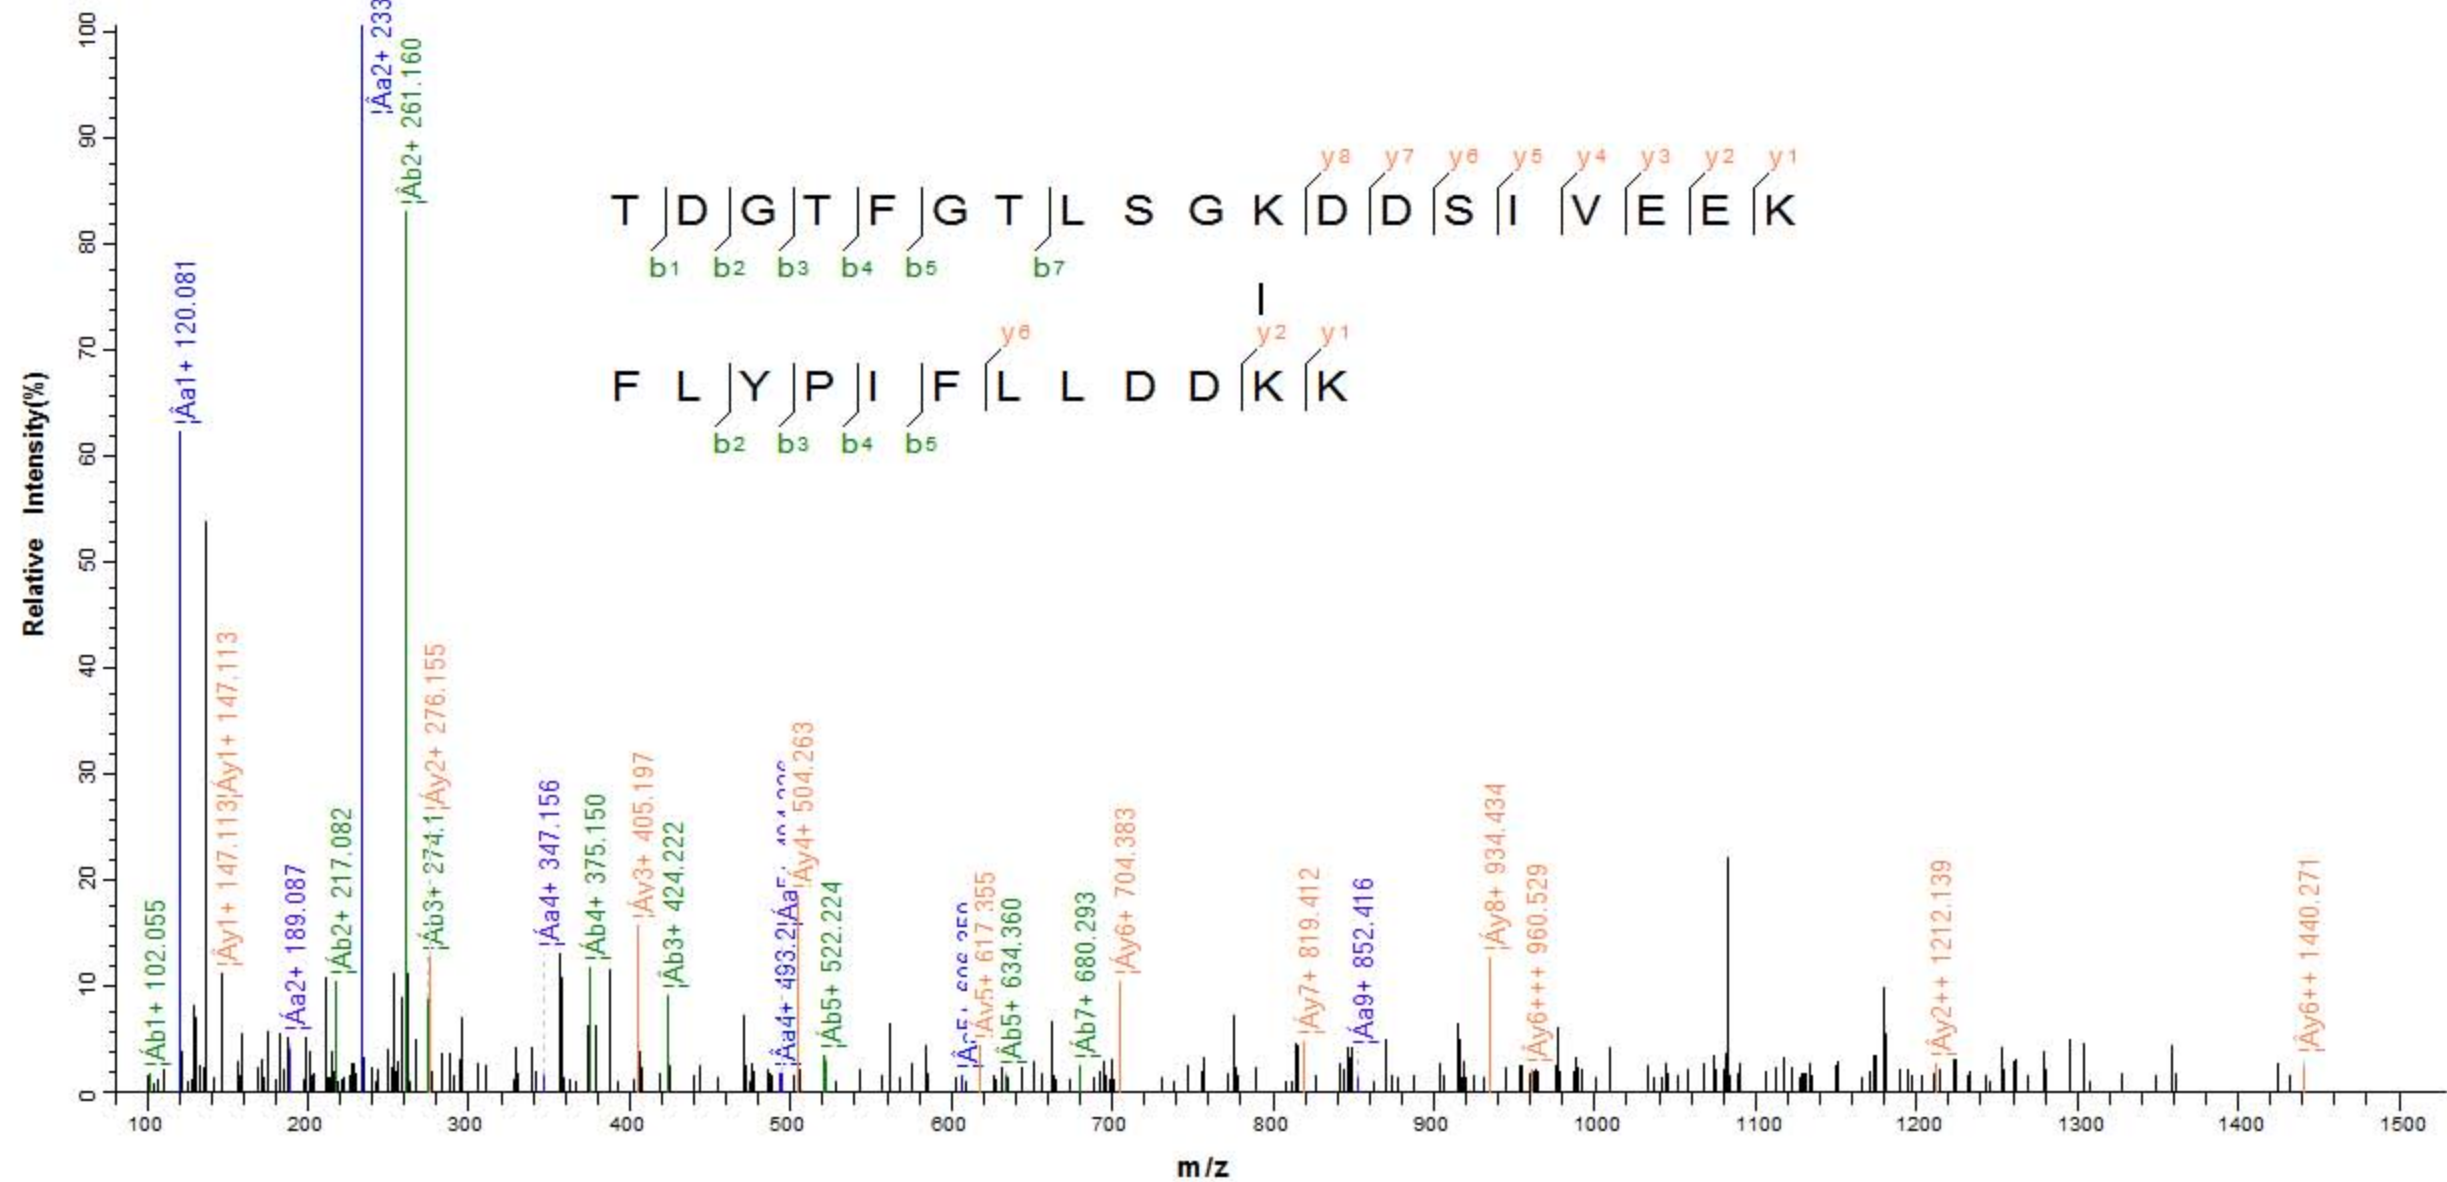

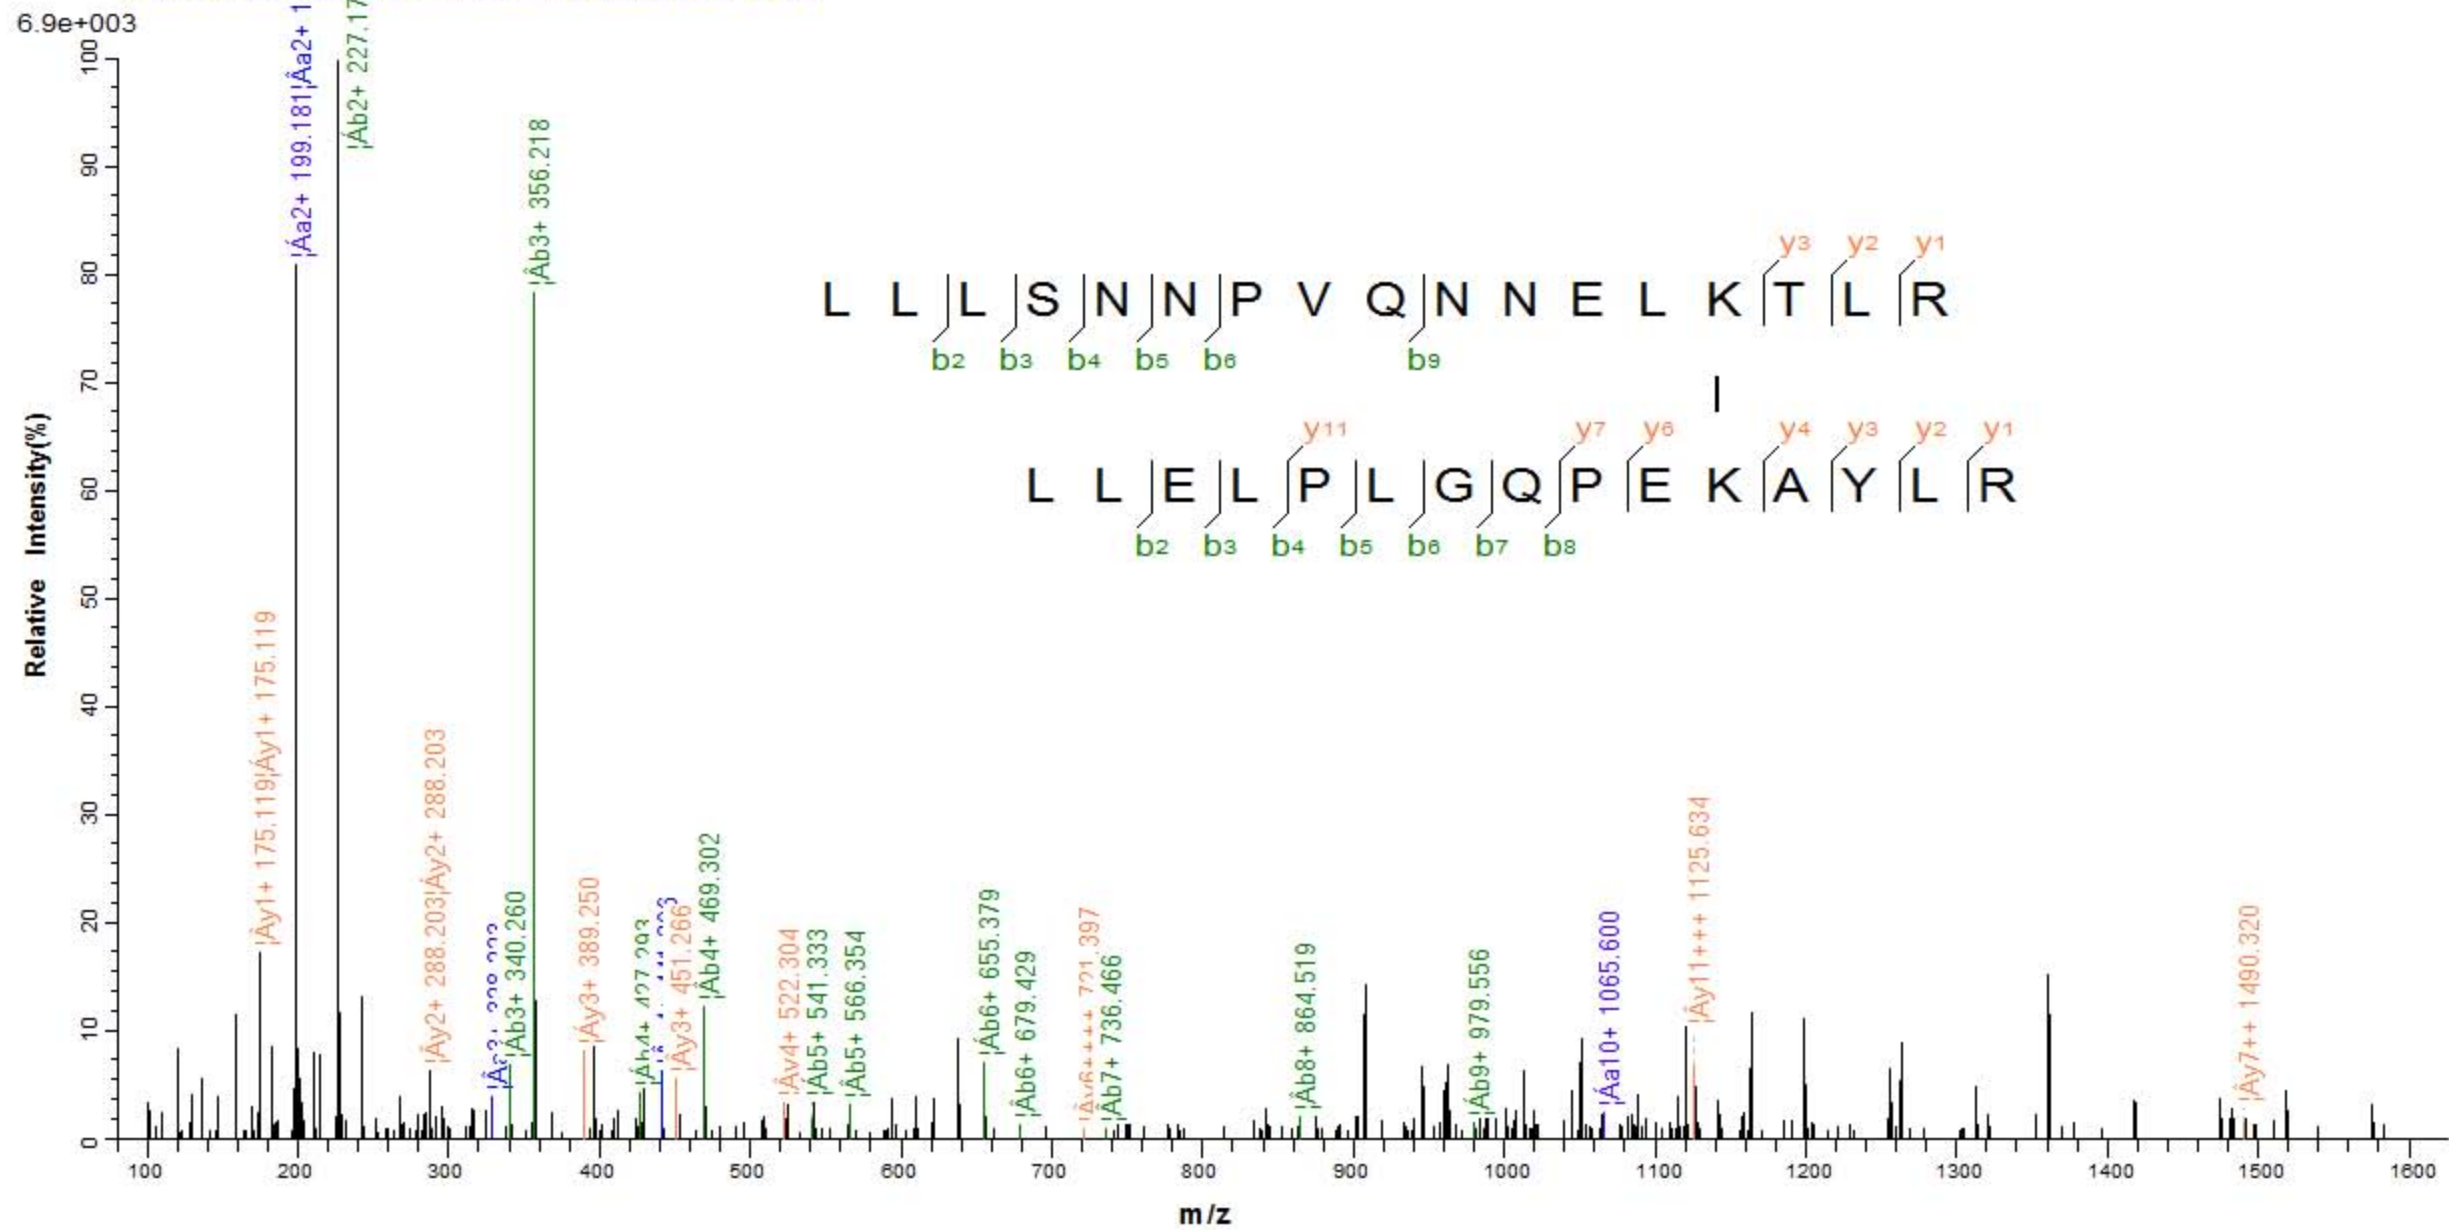

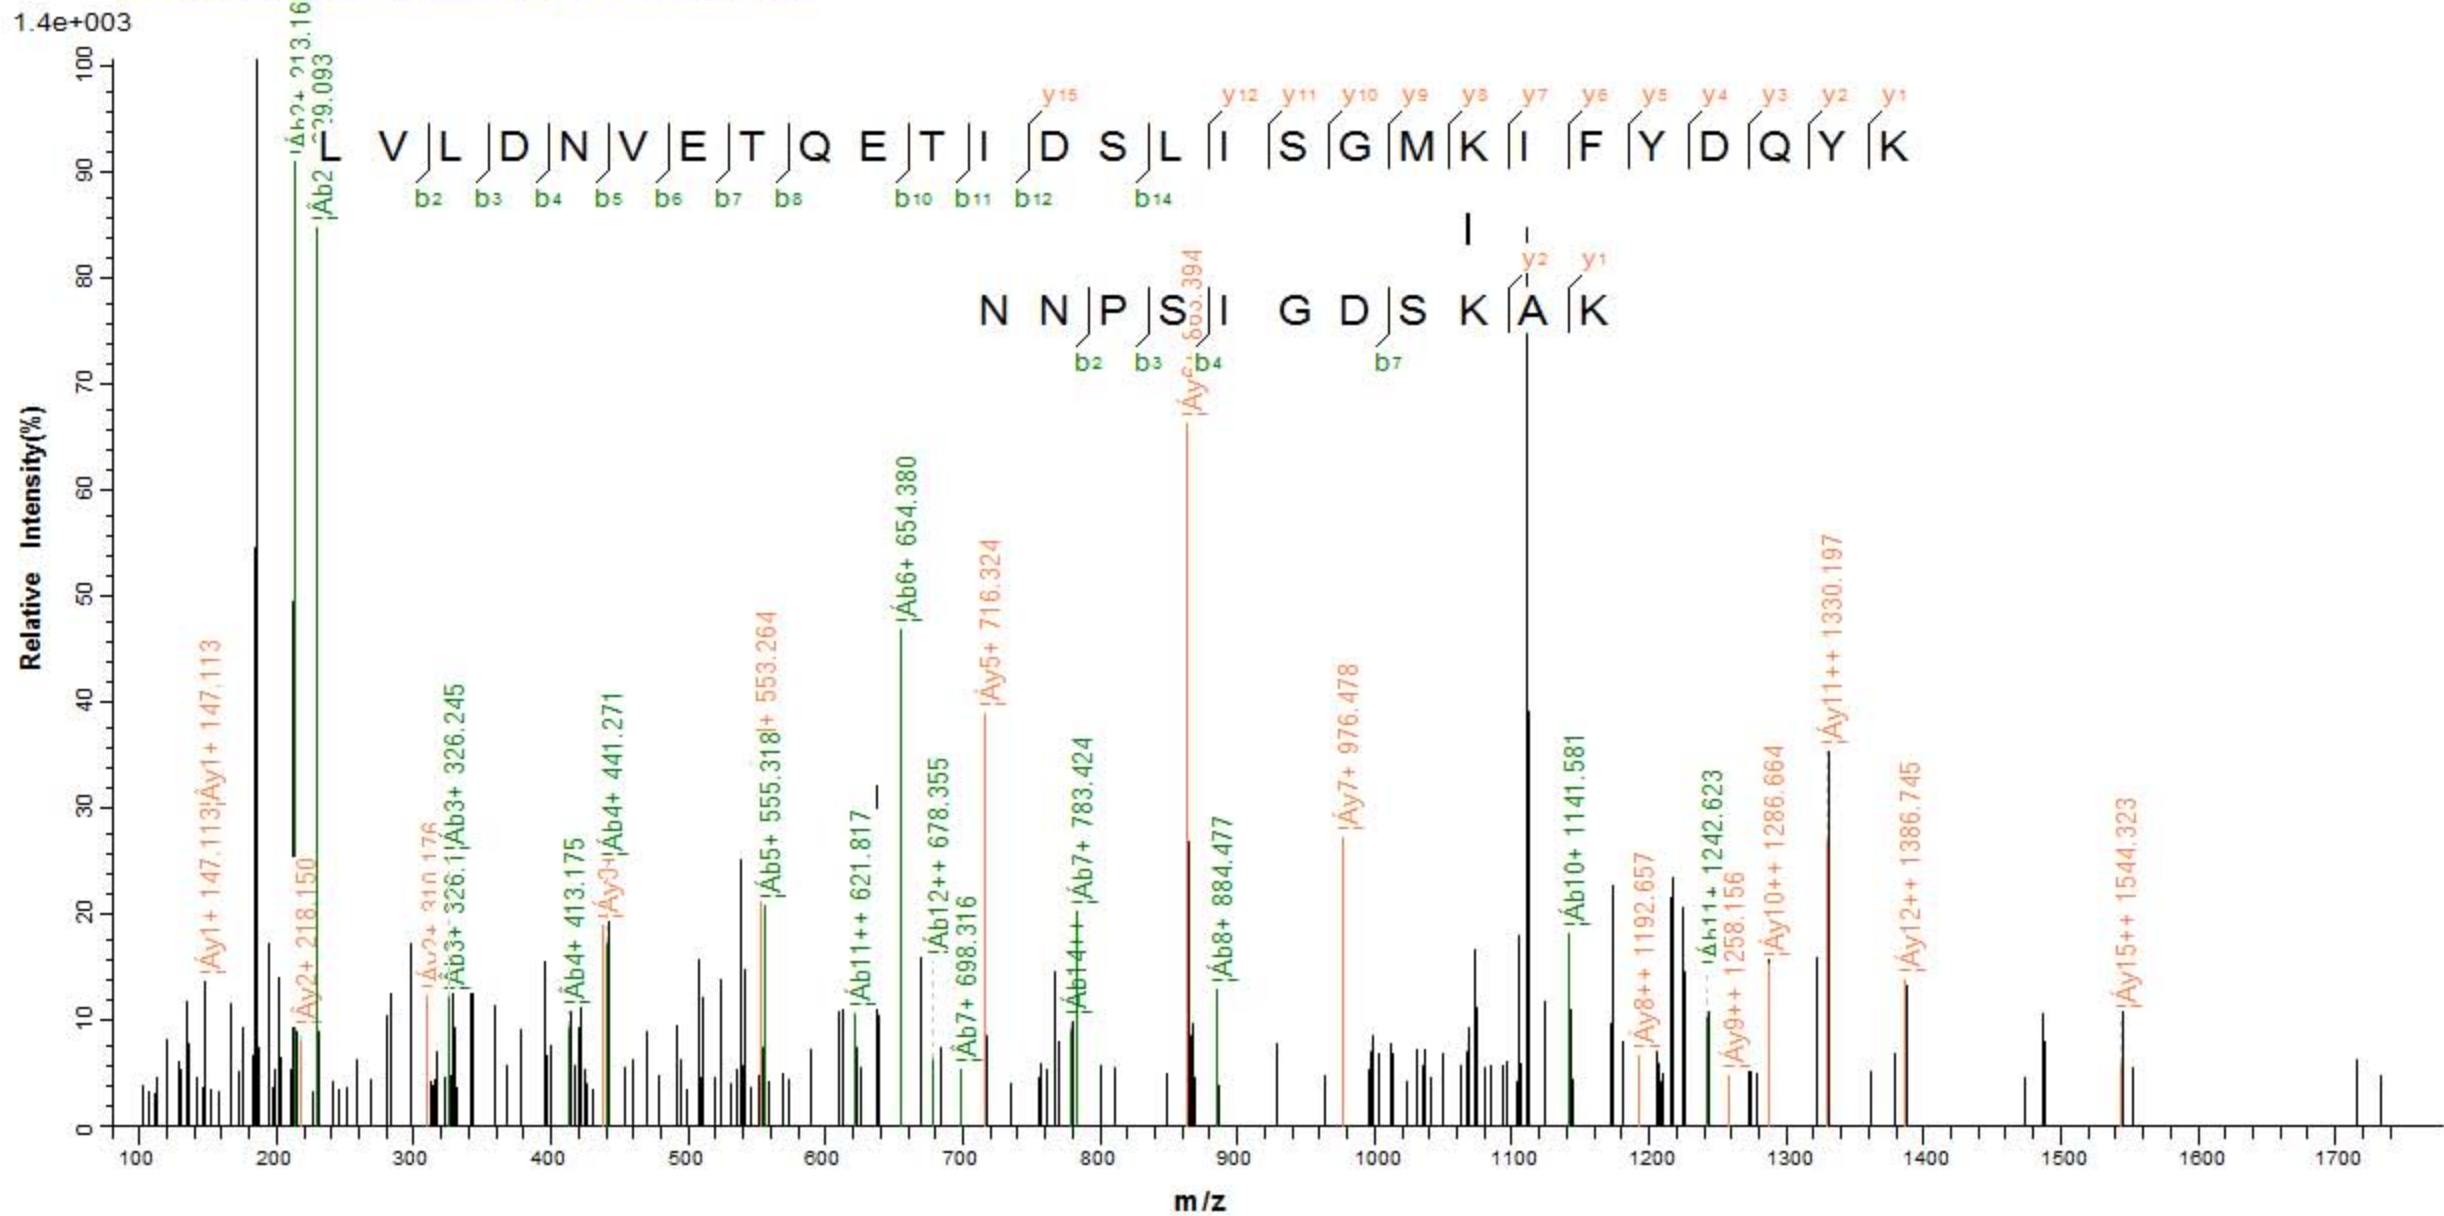

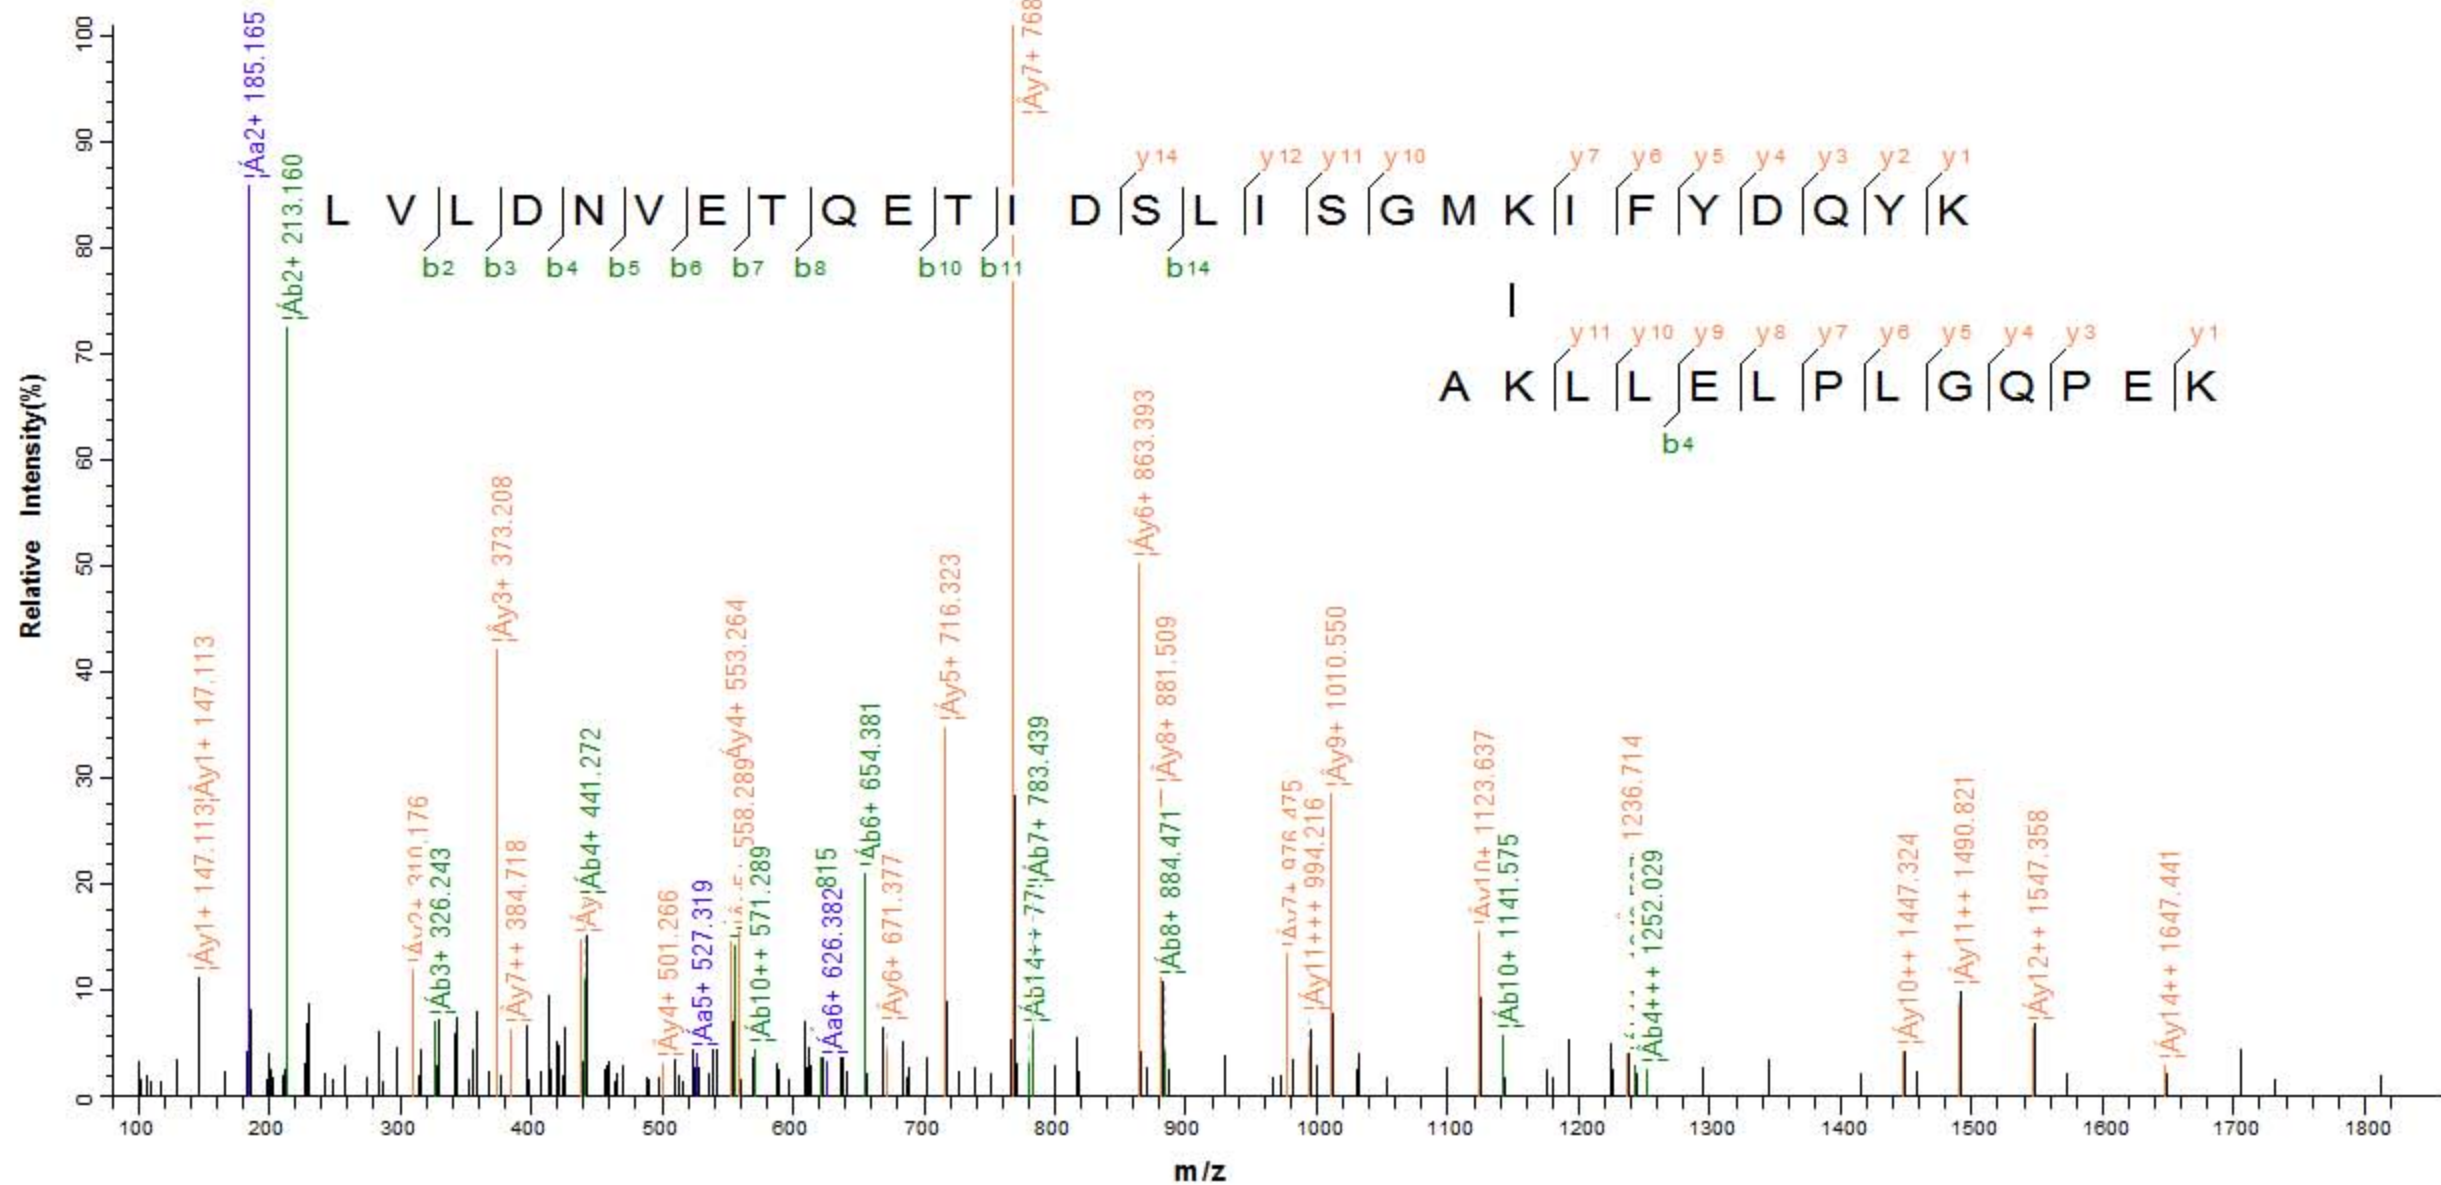

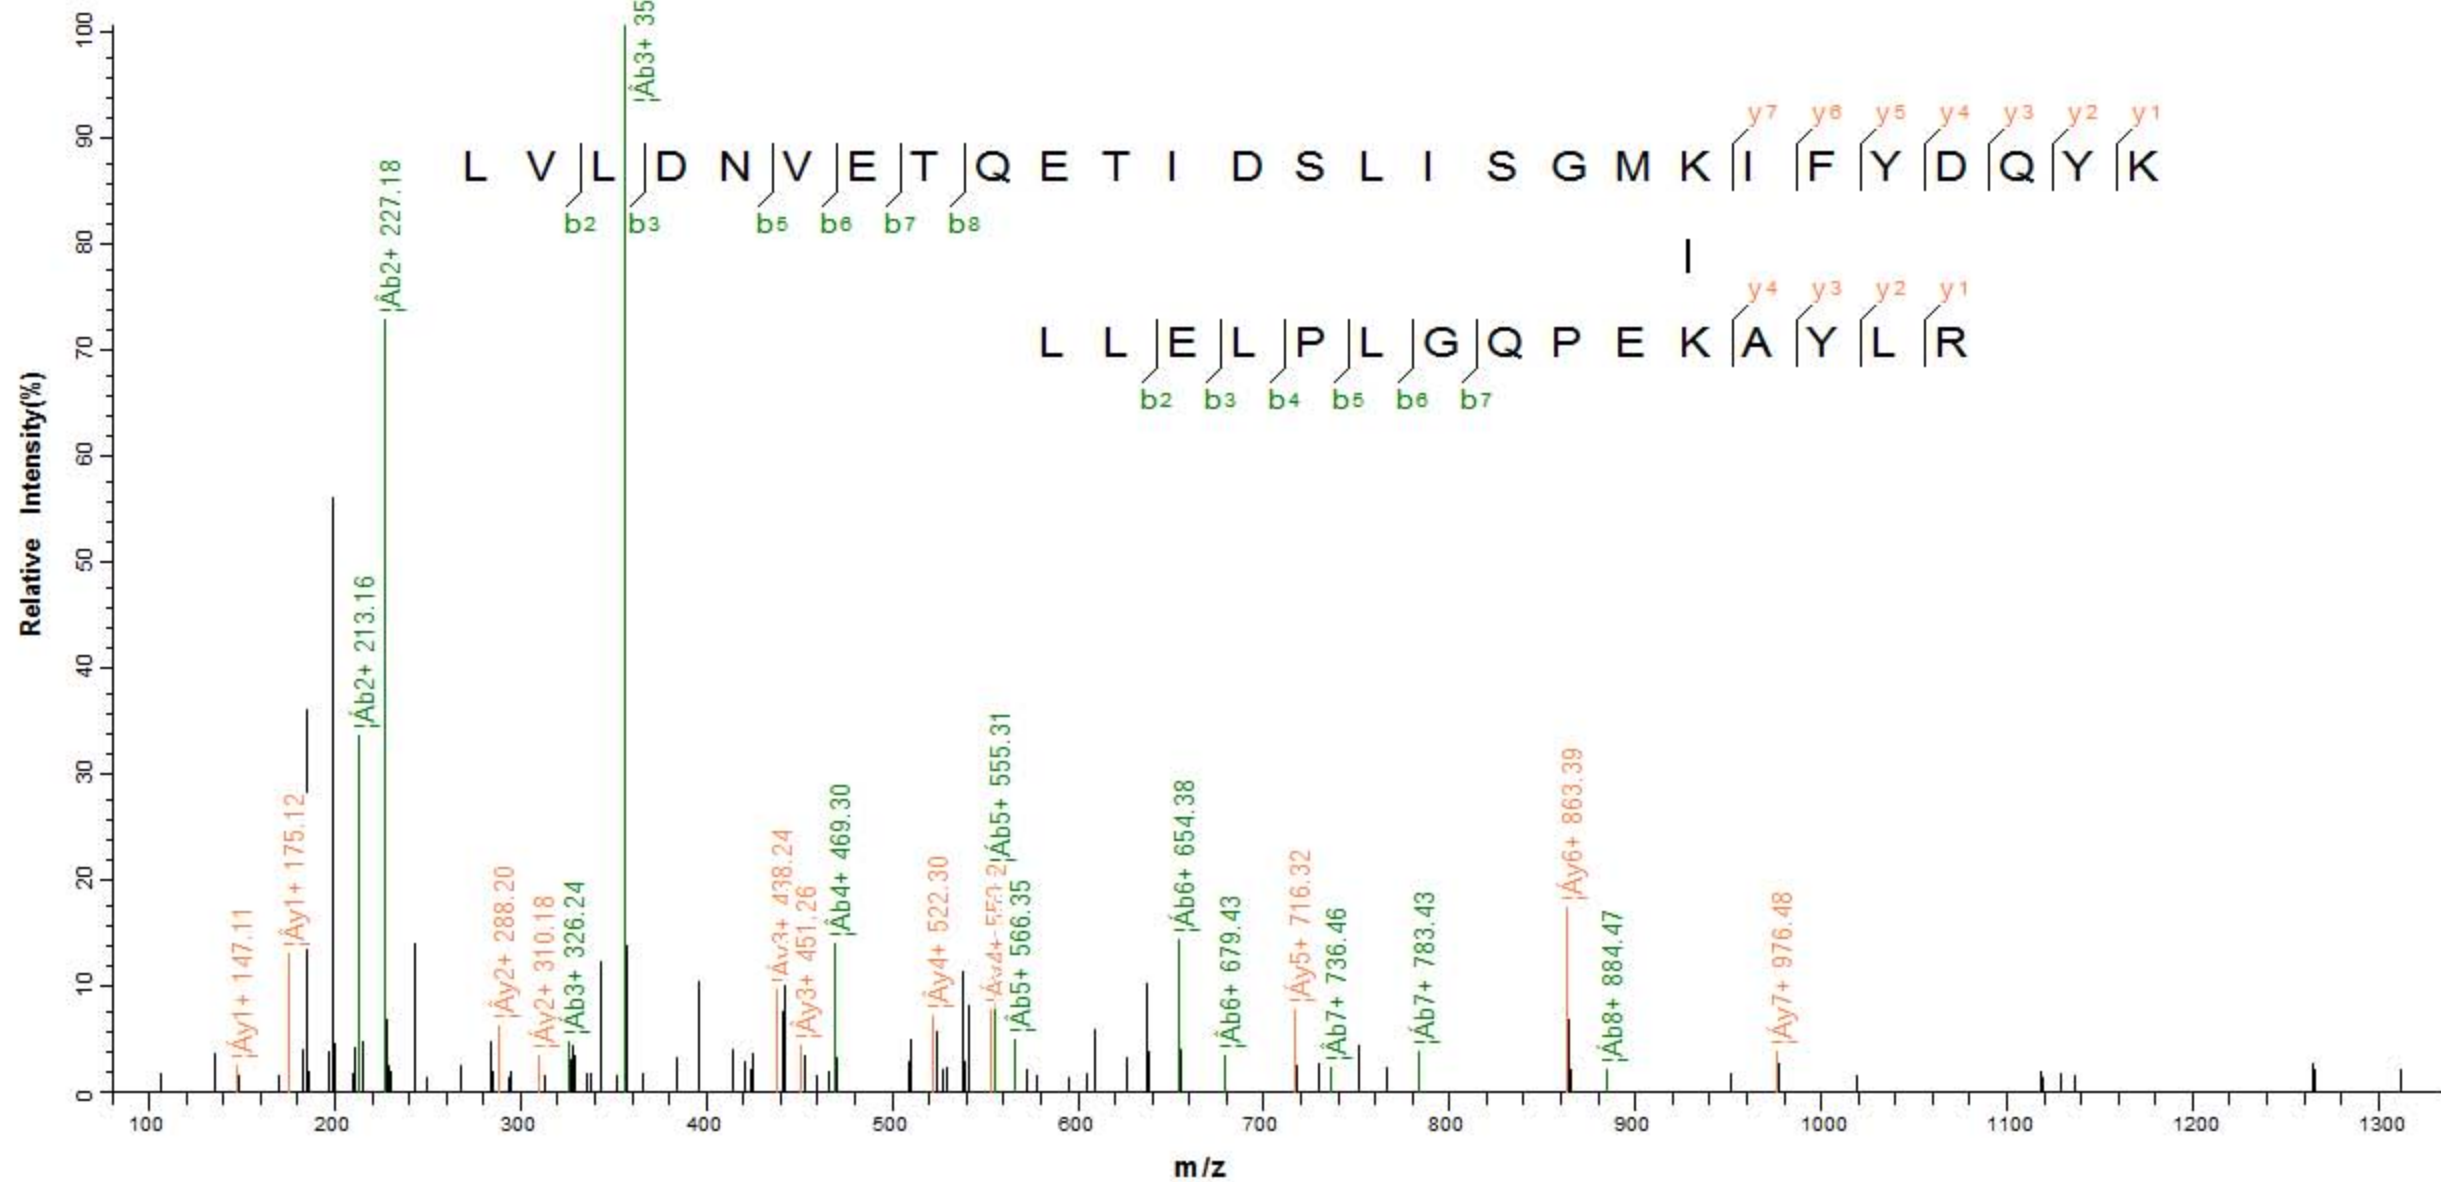

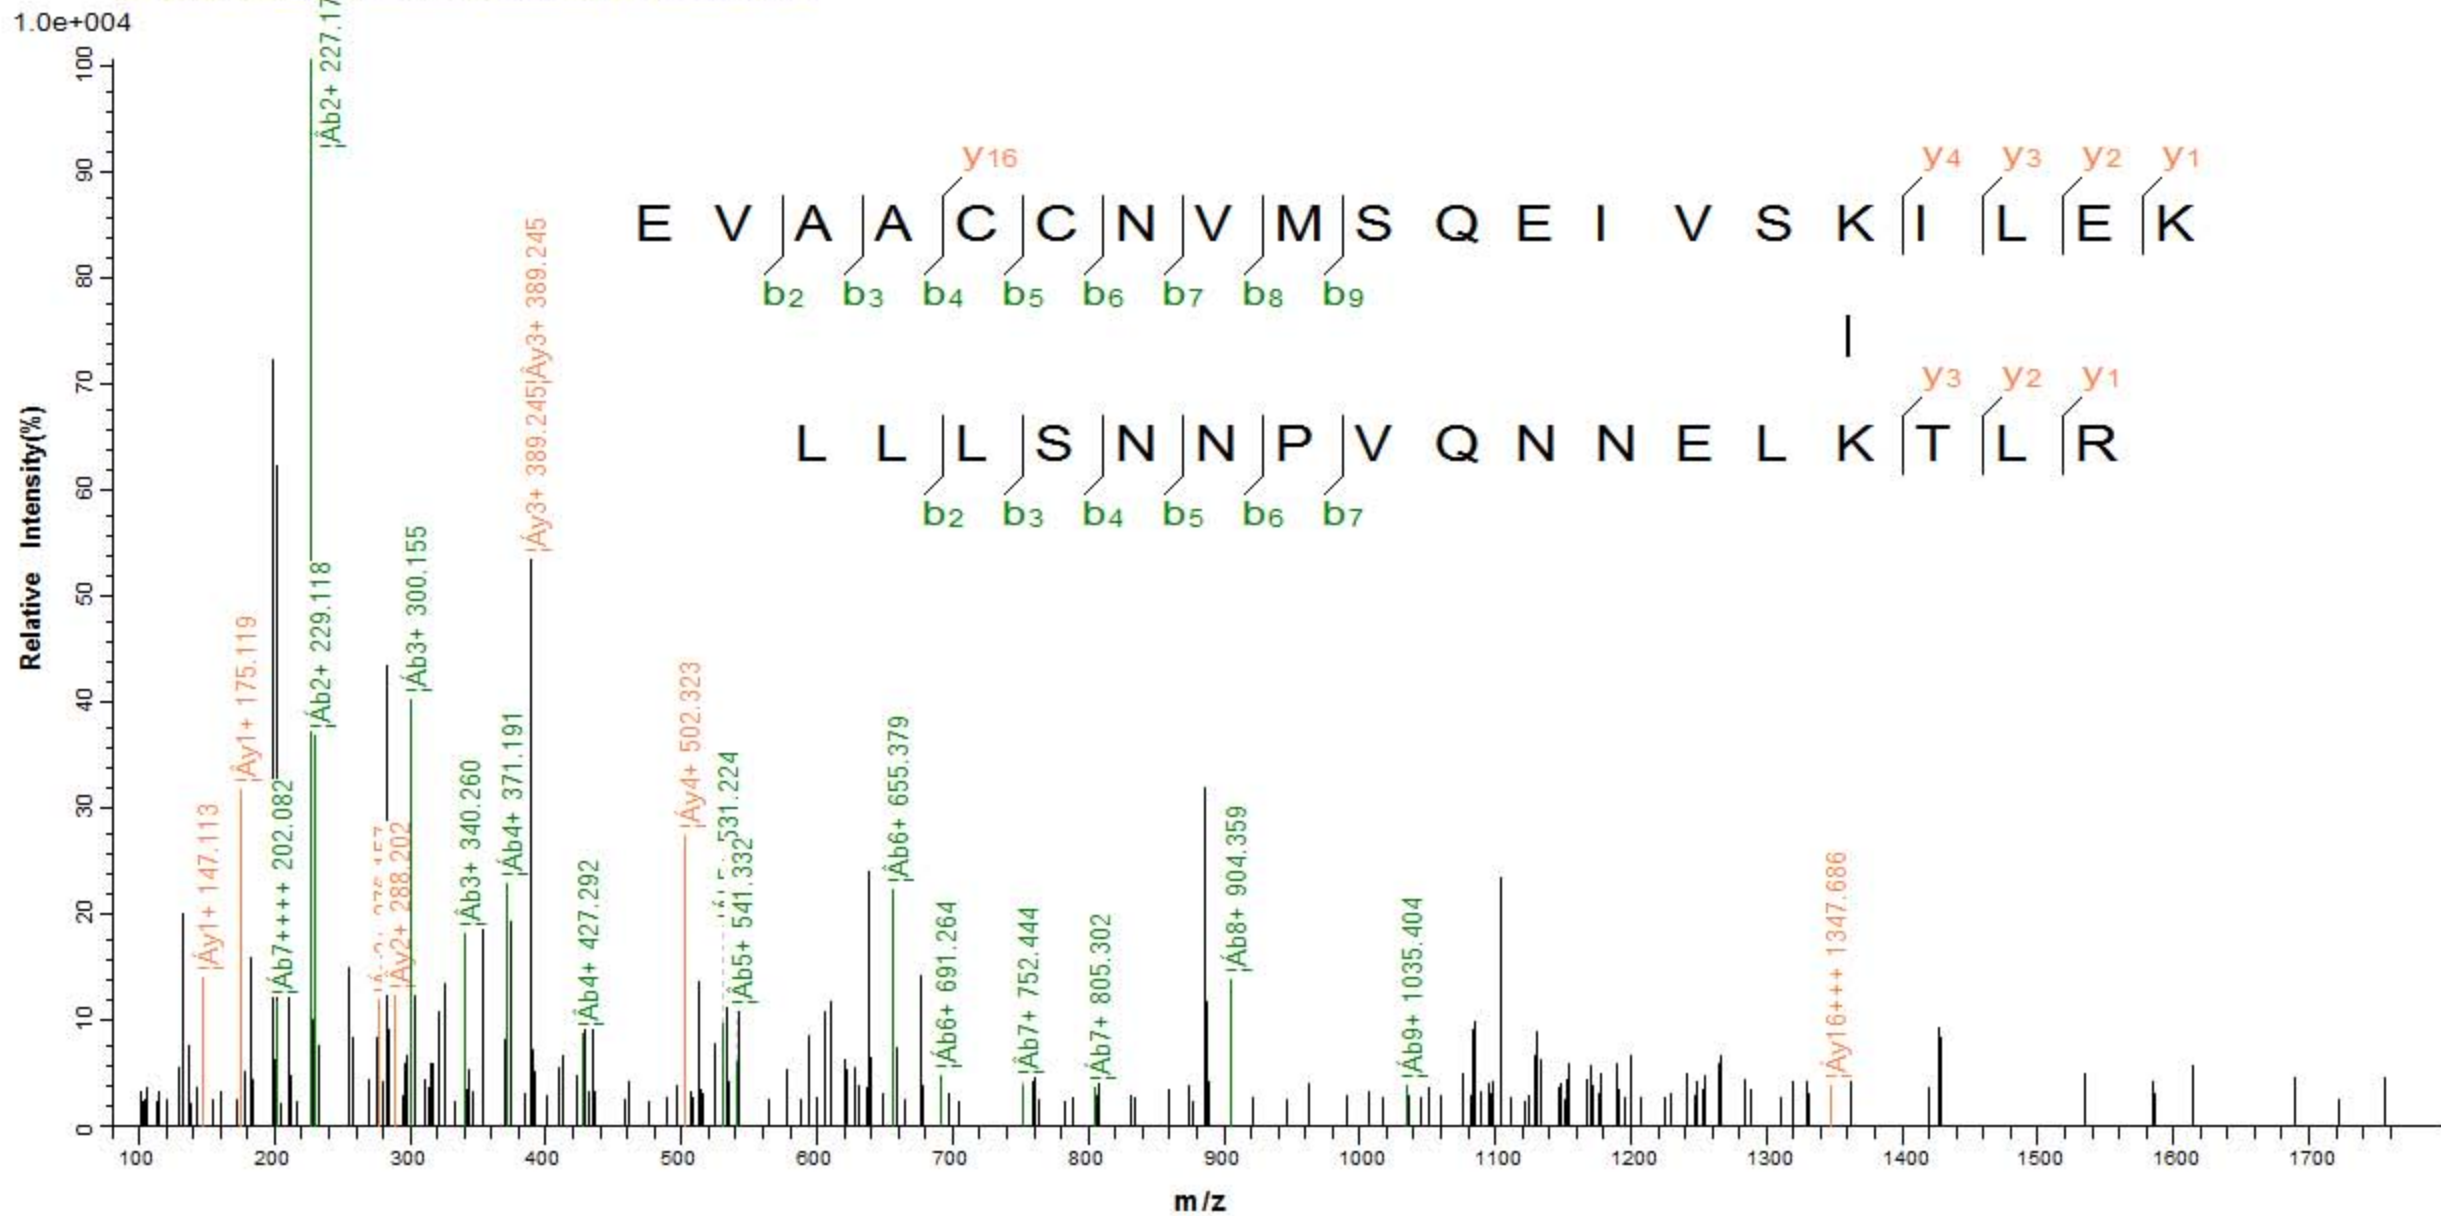

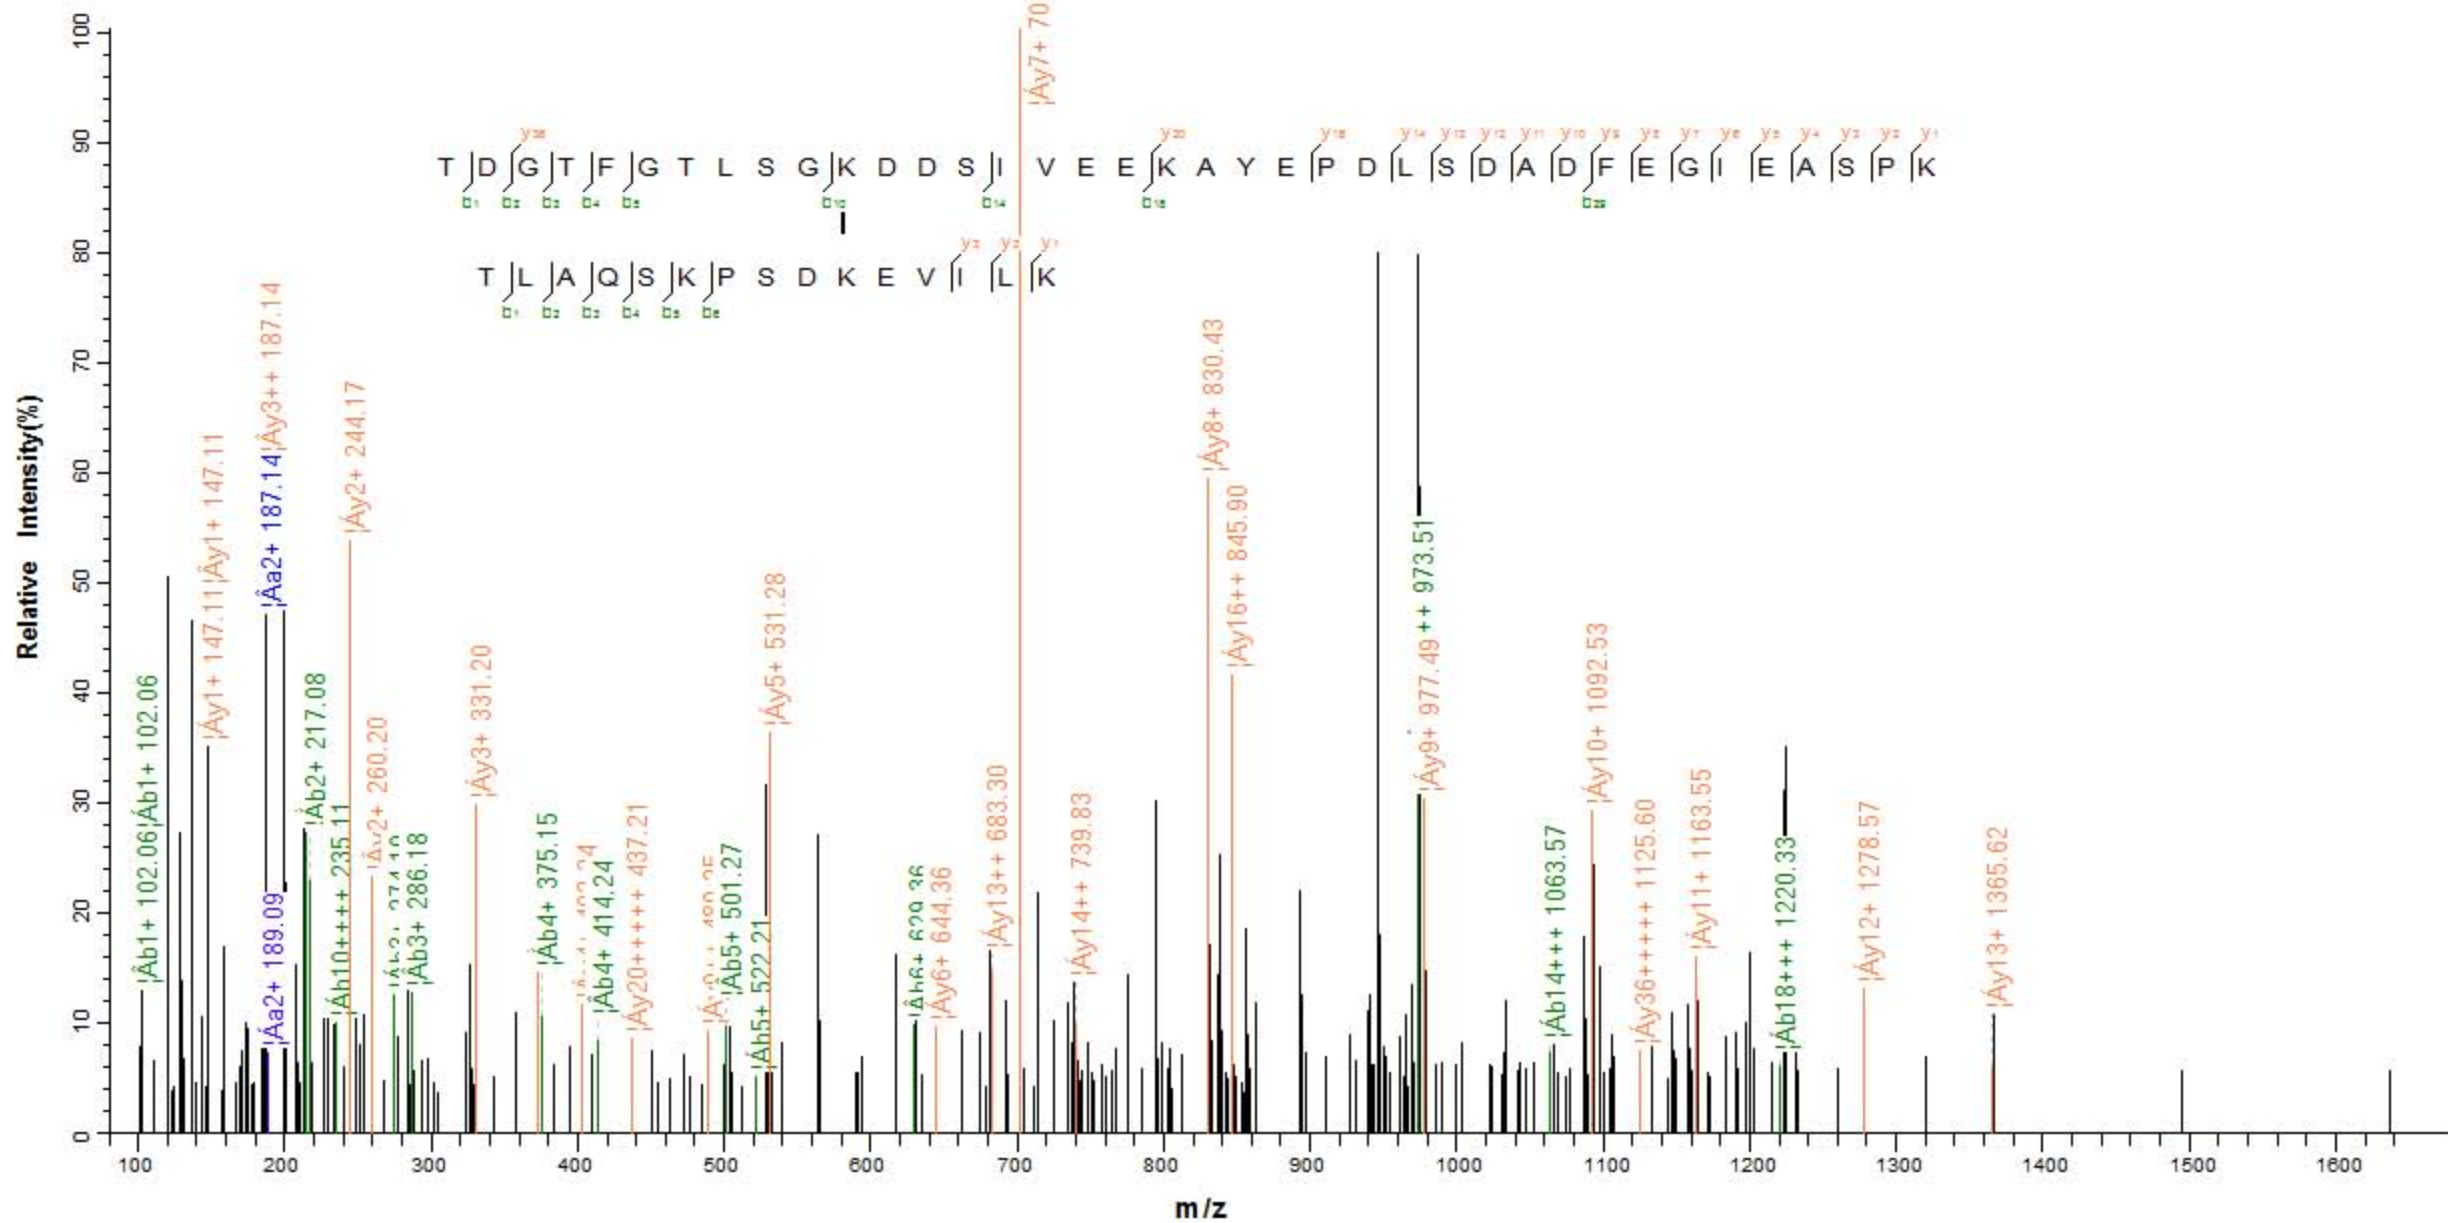



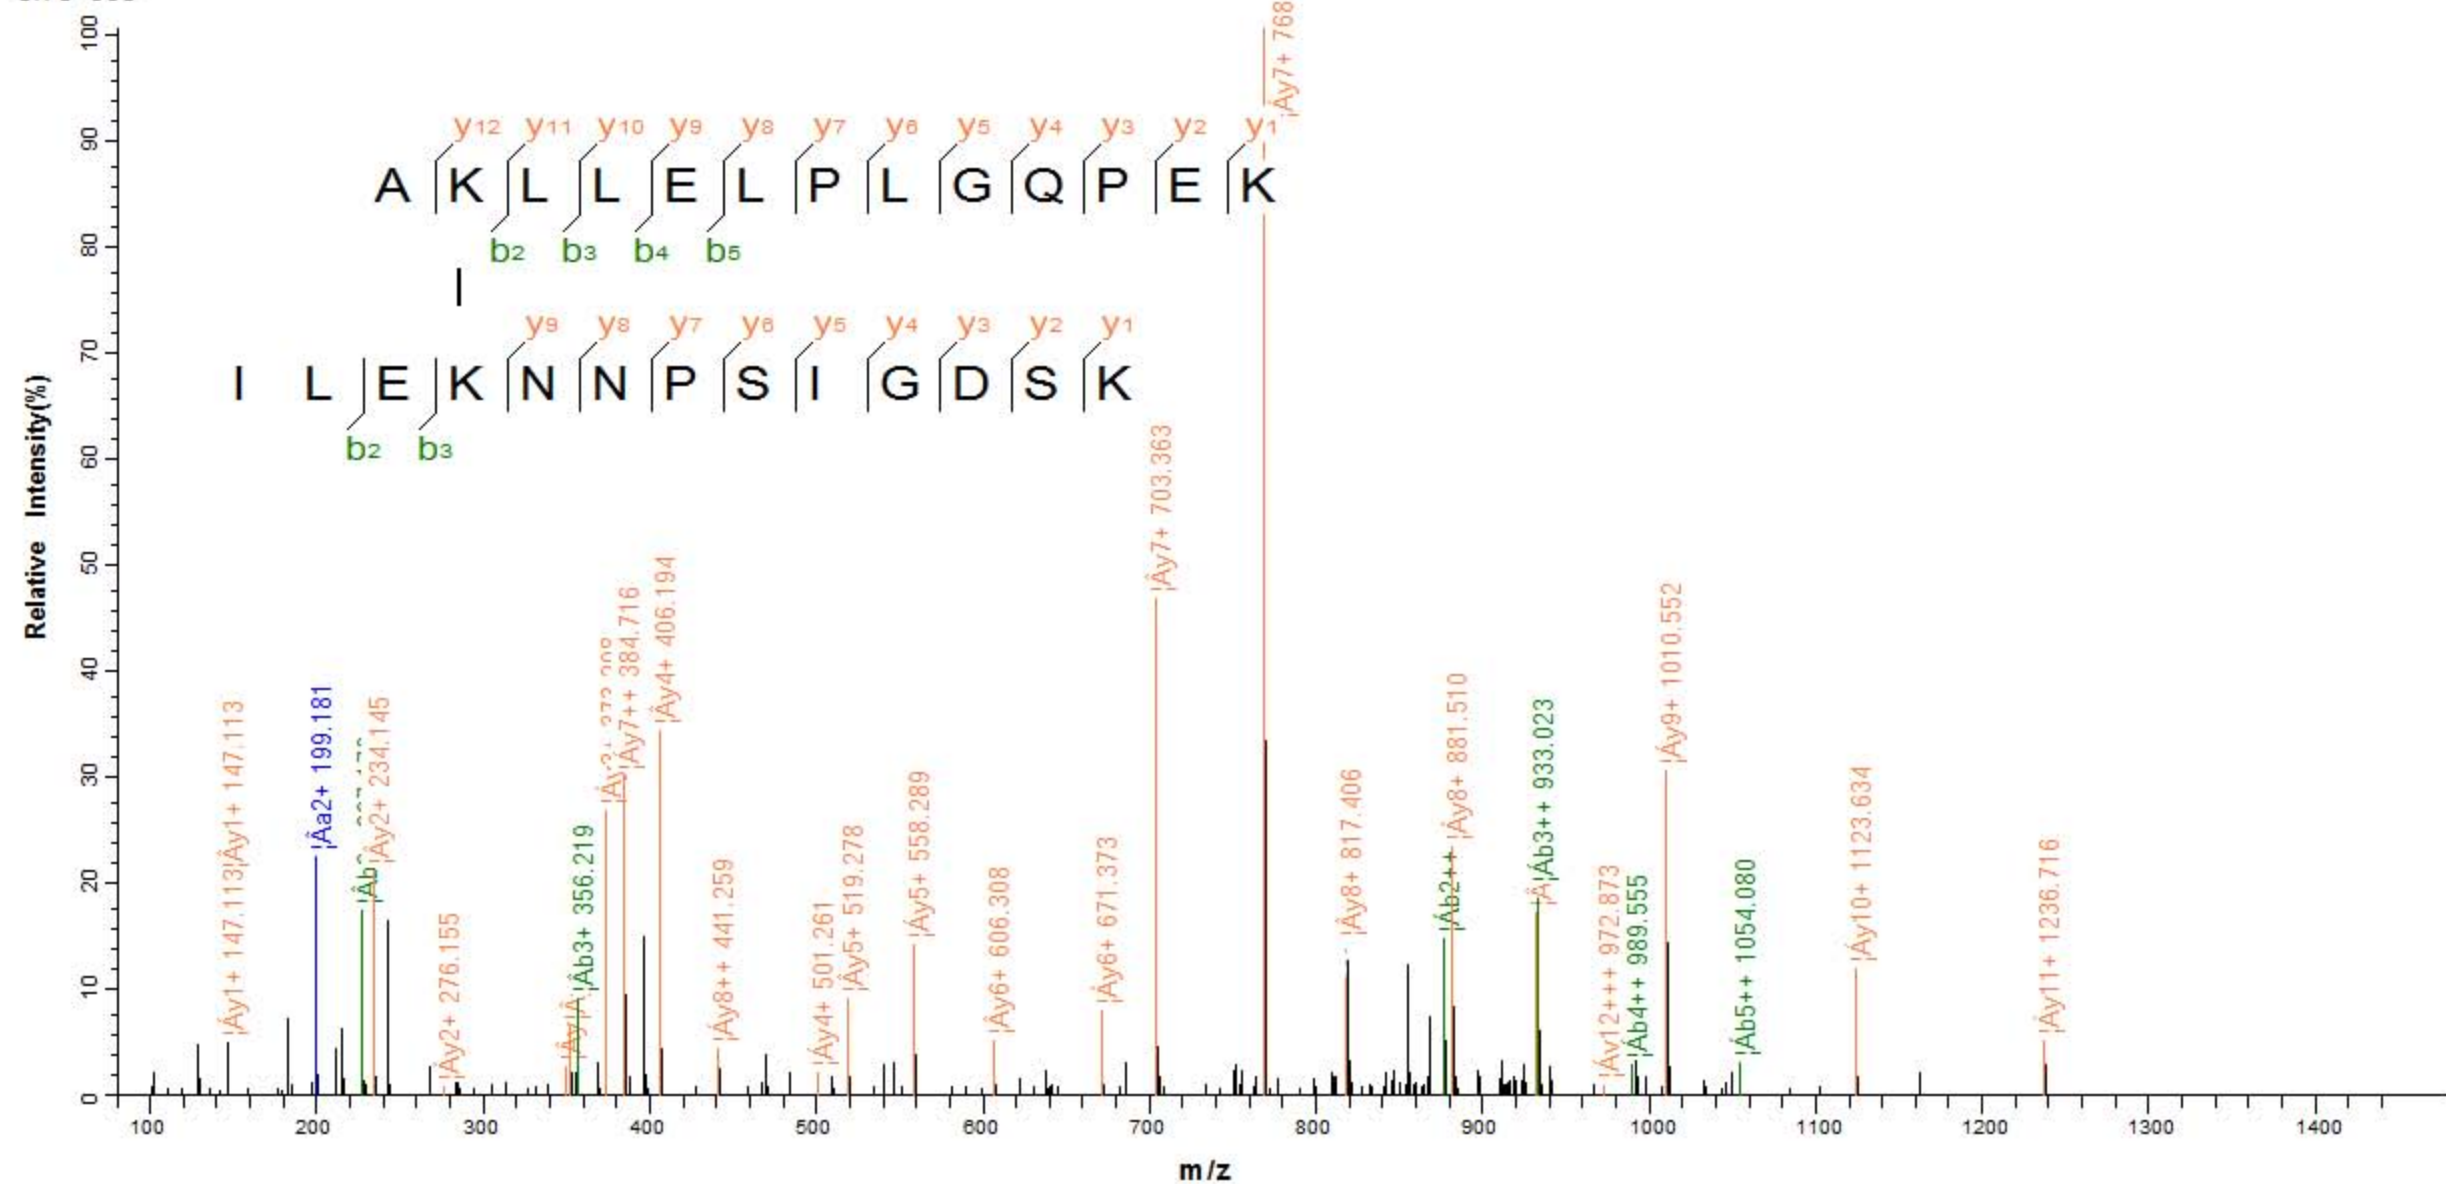

4.0e+004

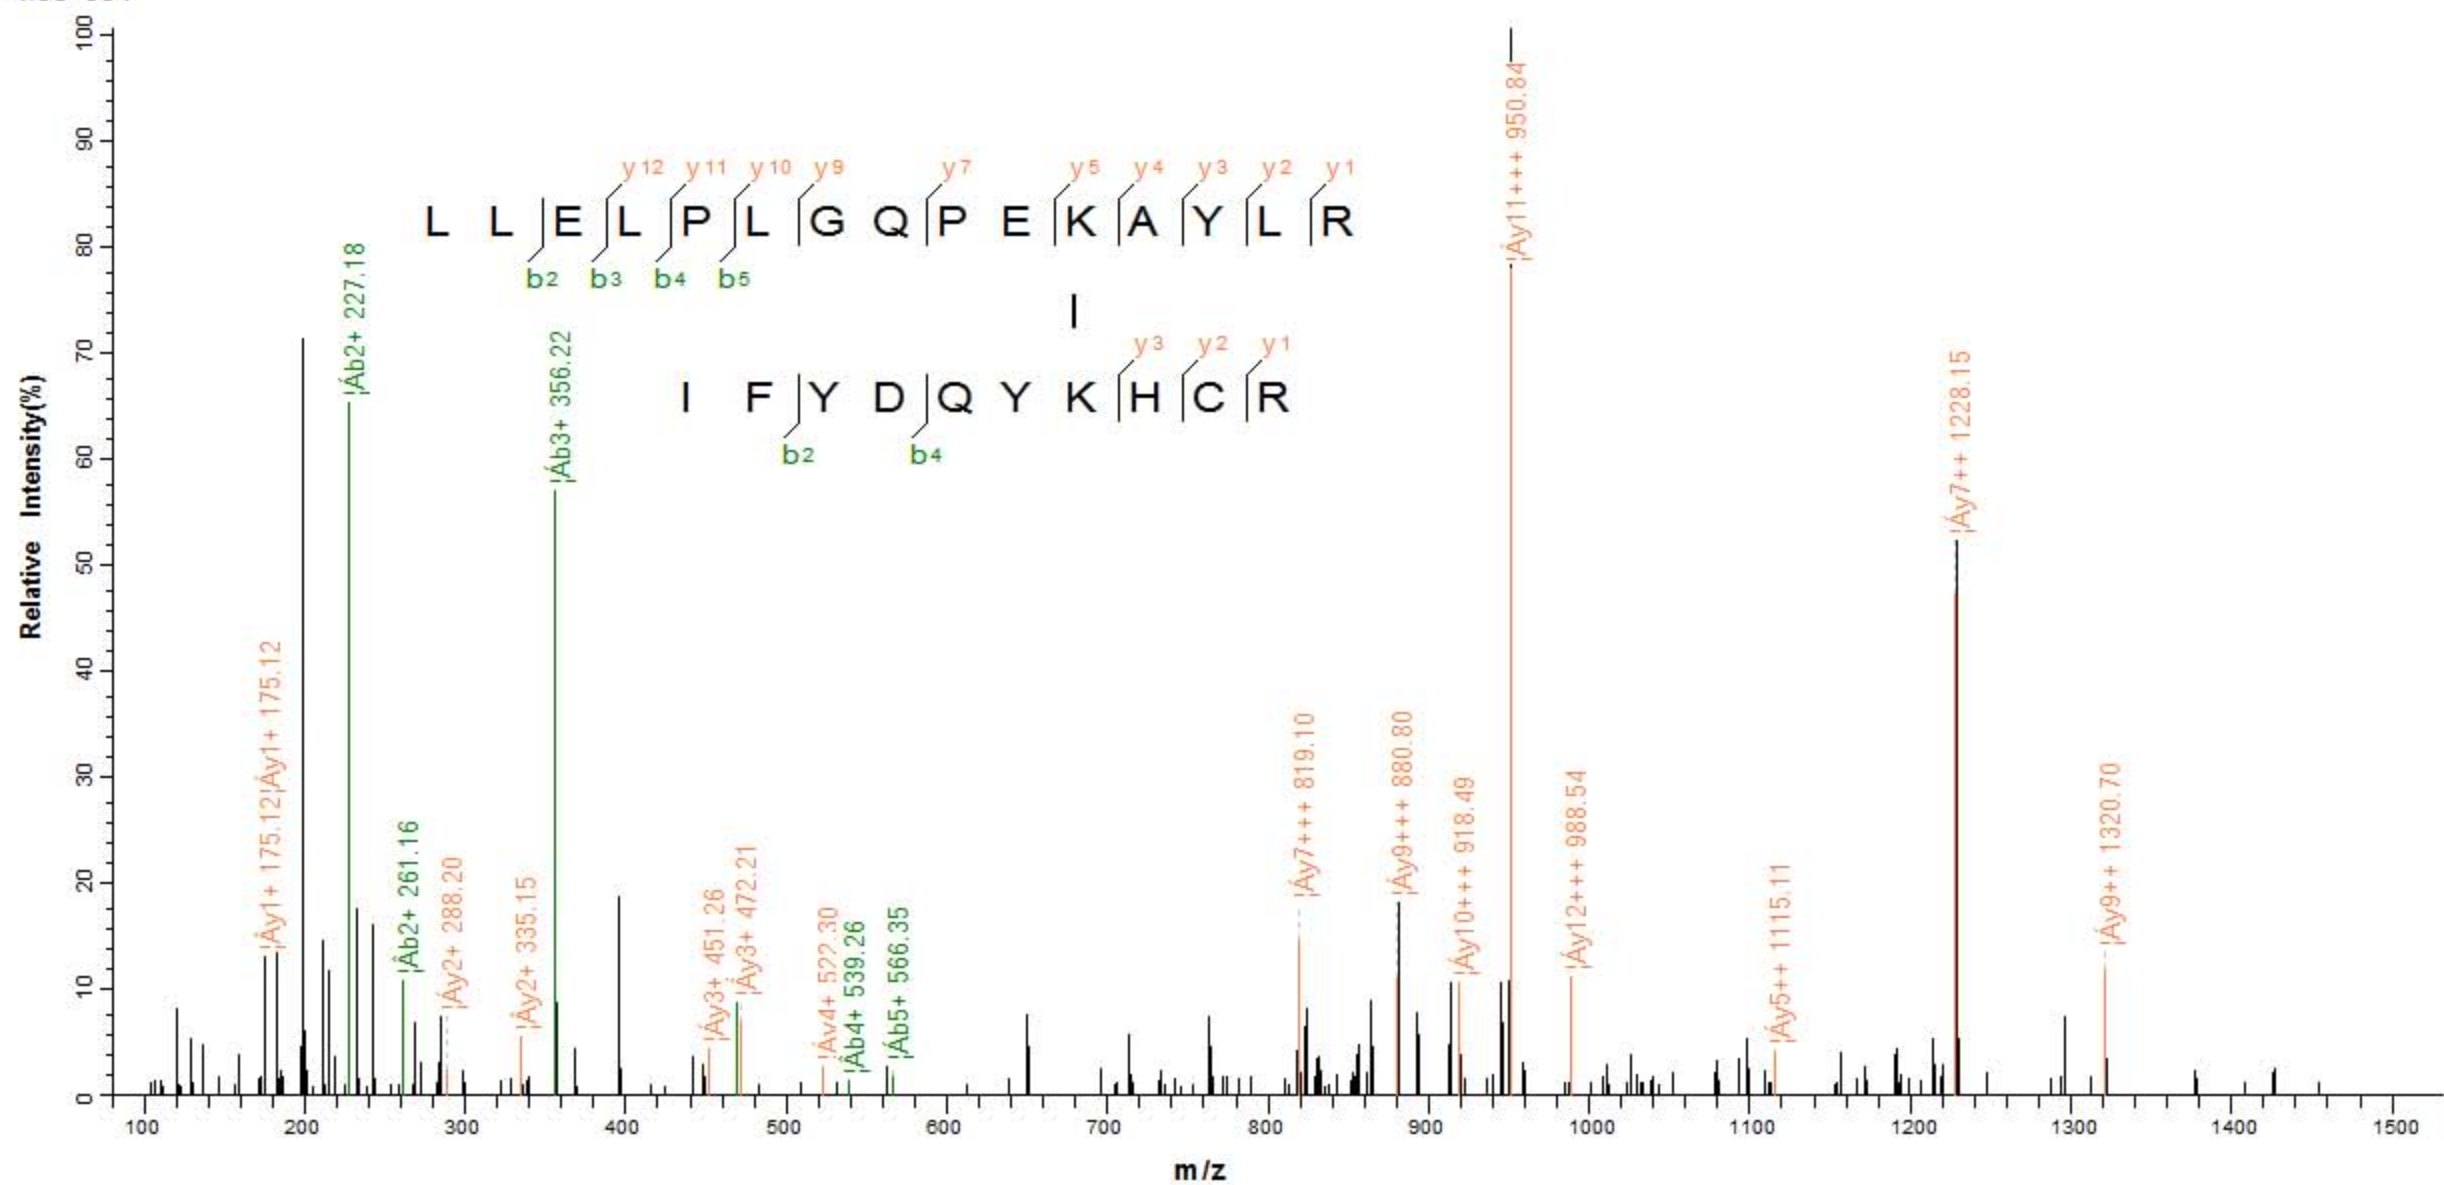

2.1e+004

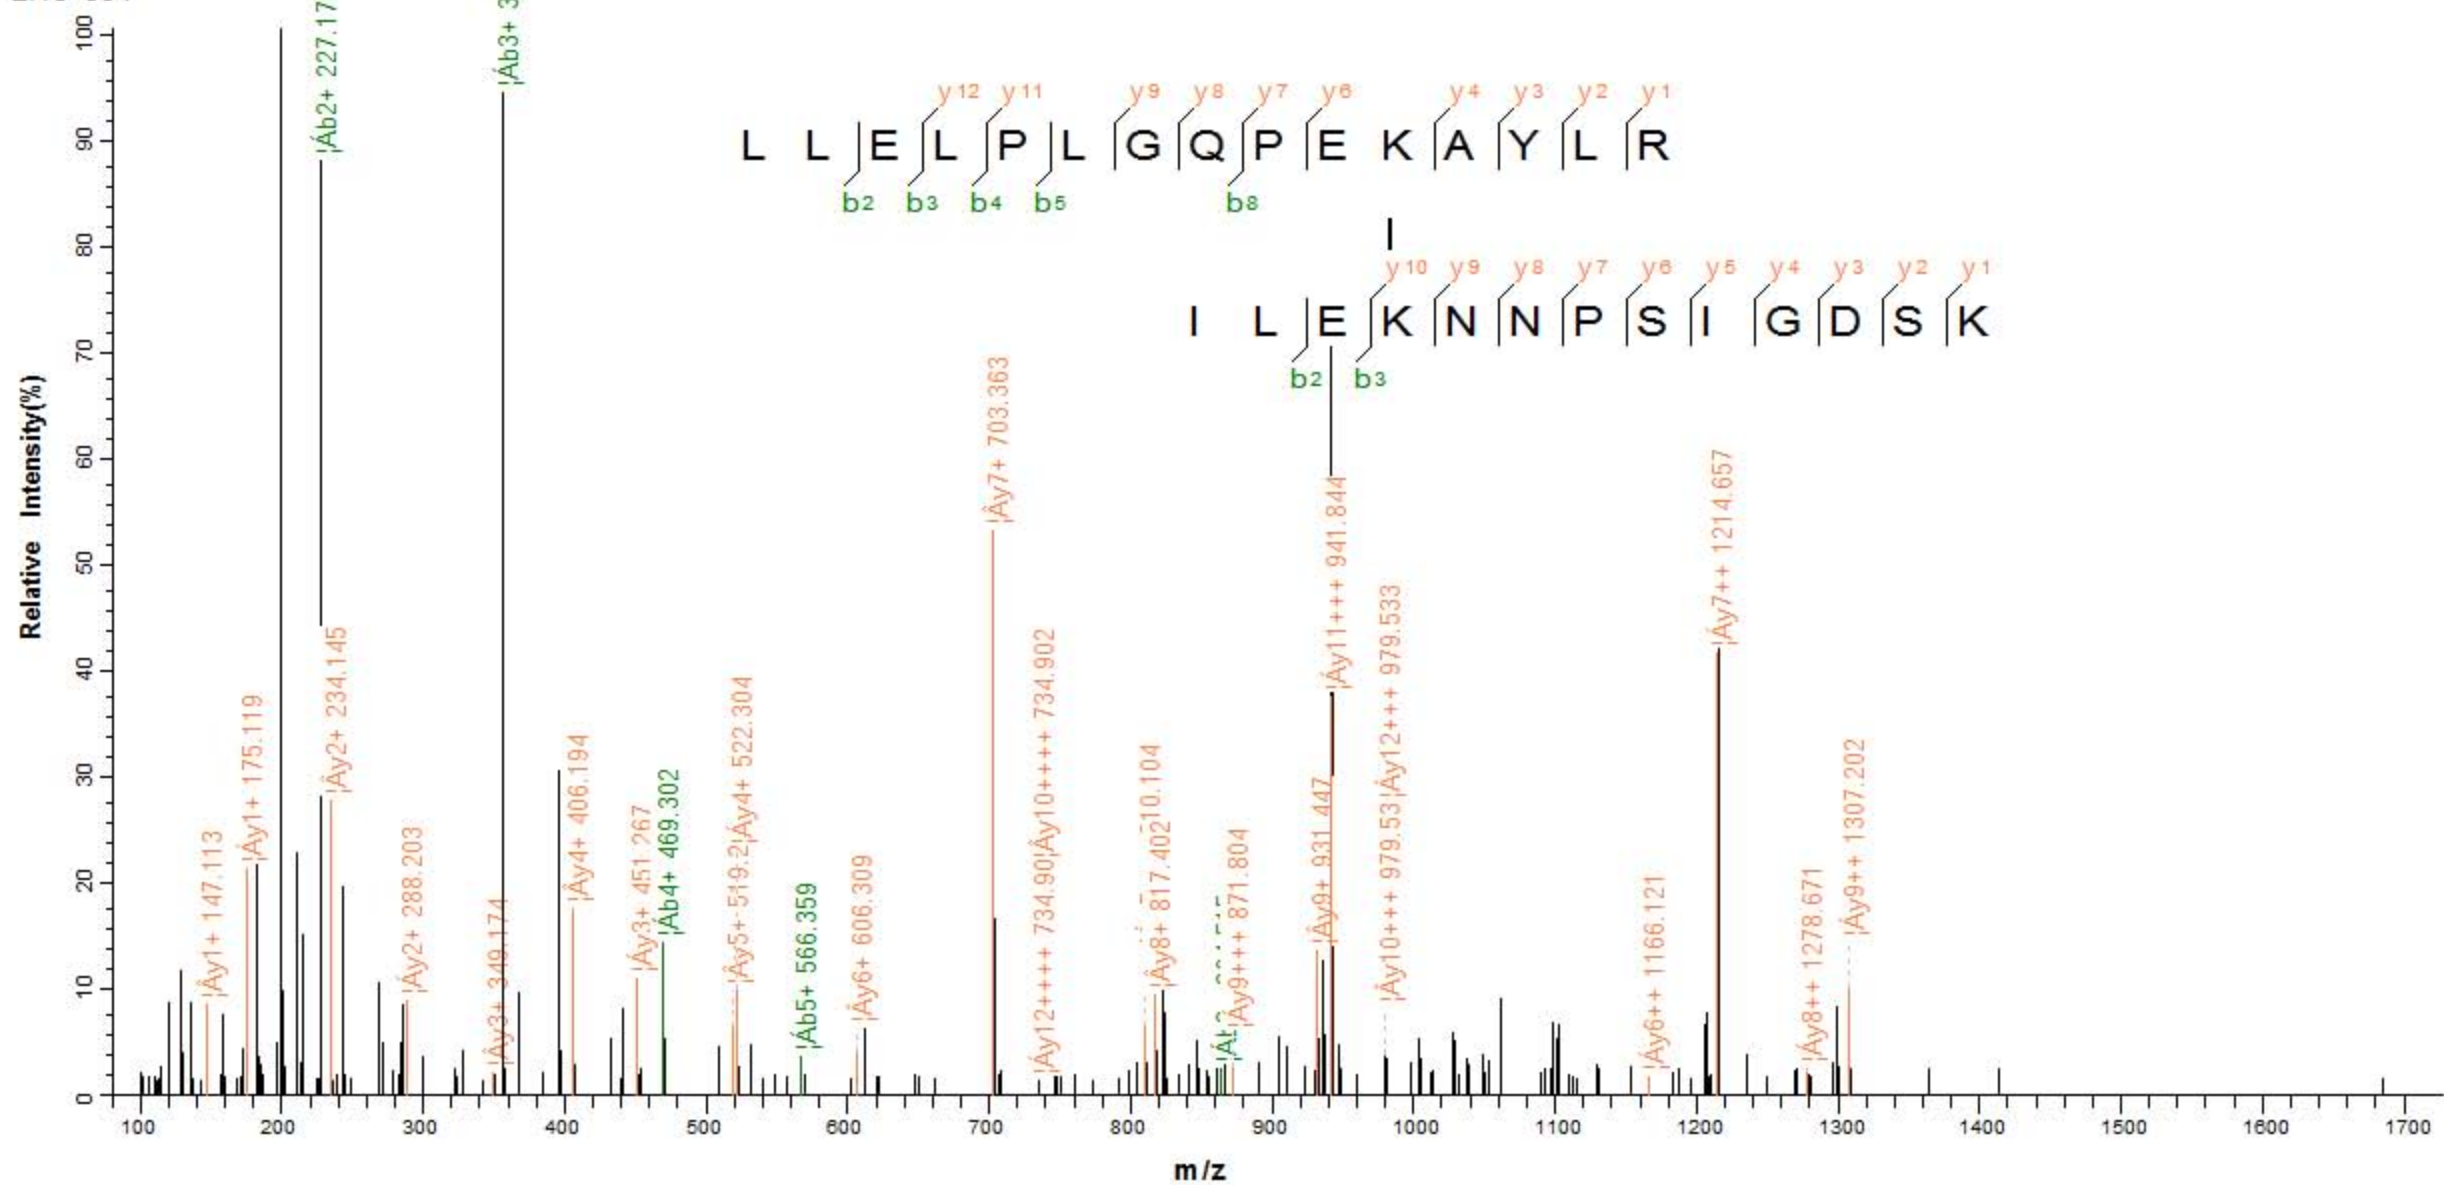

9.5e+004

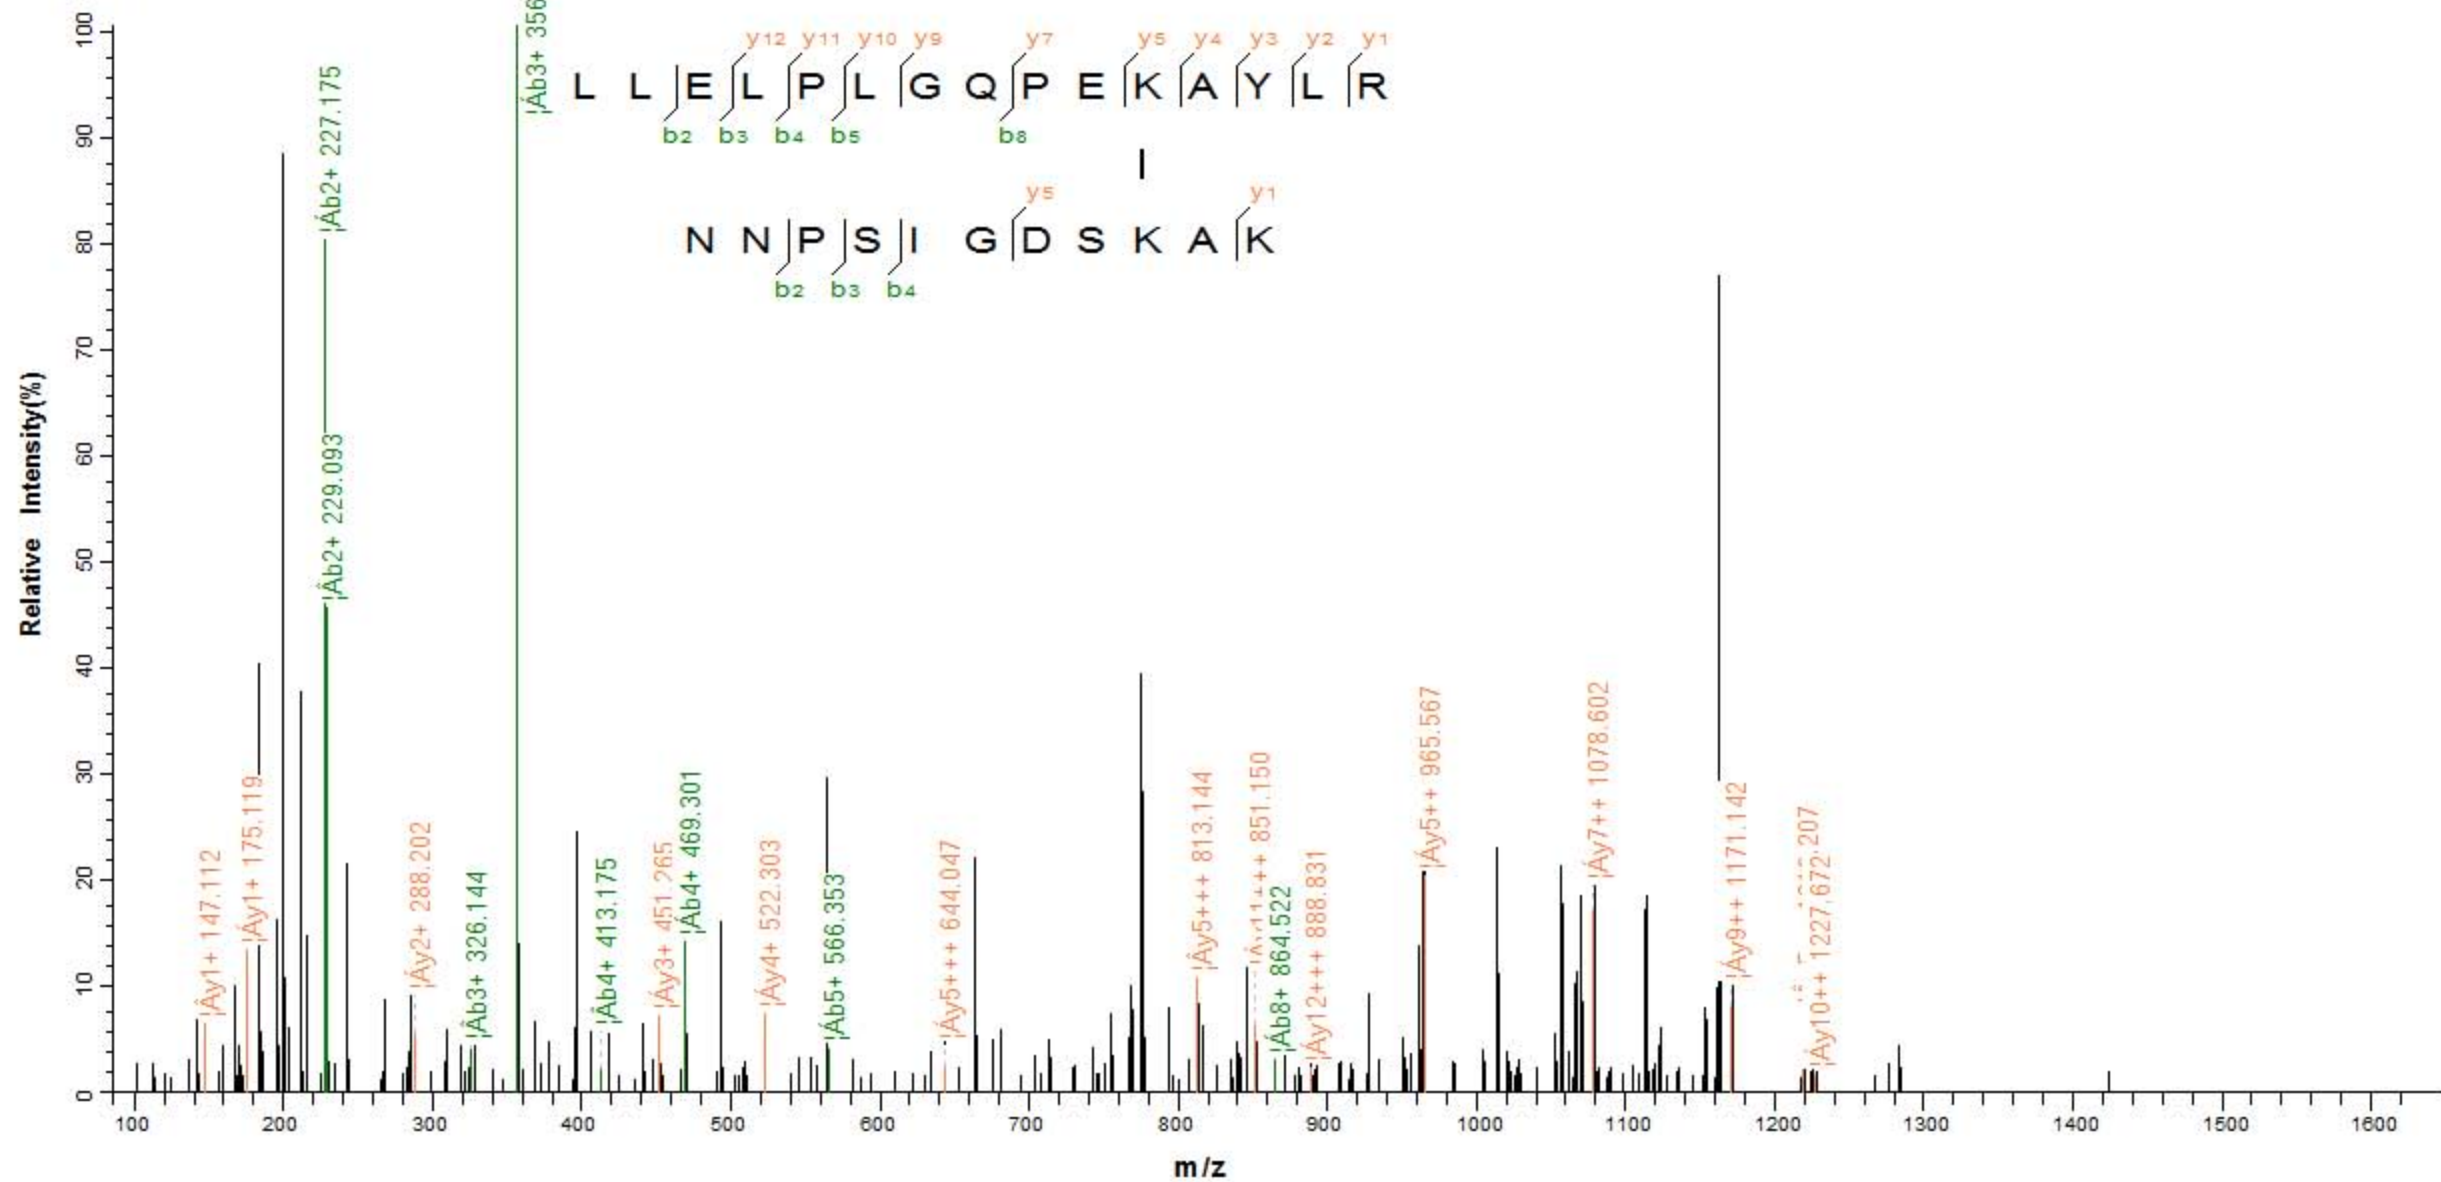

1.6e+004

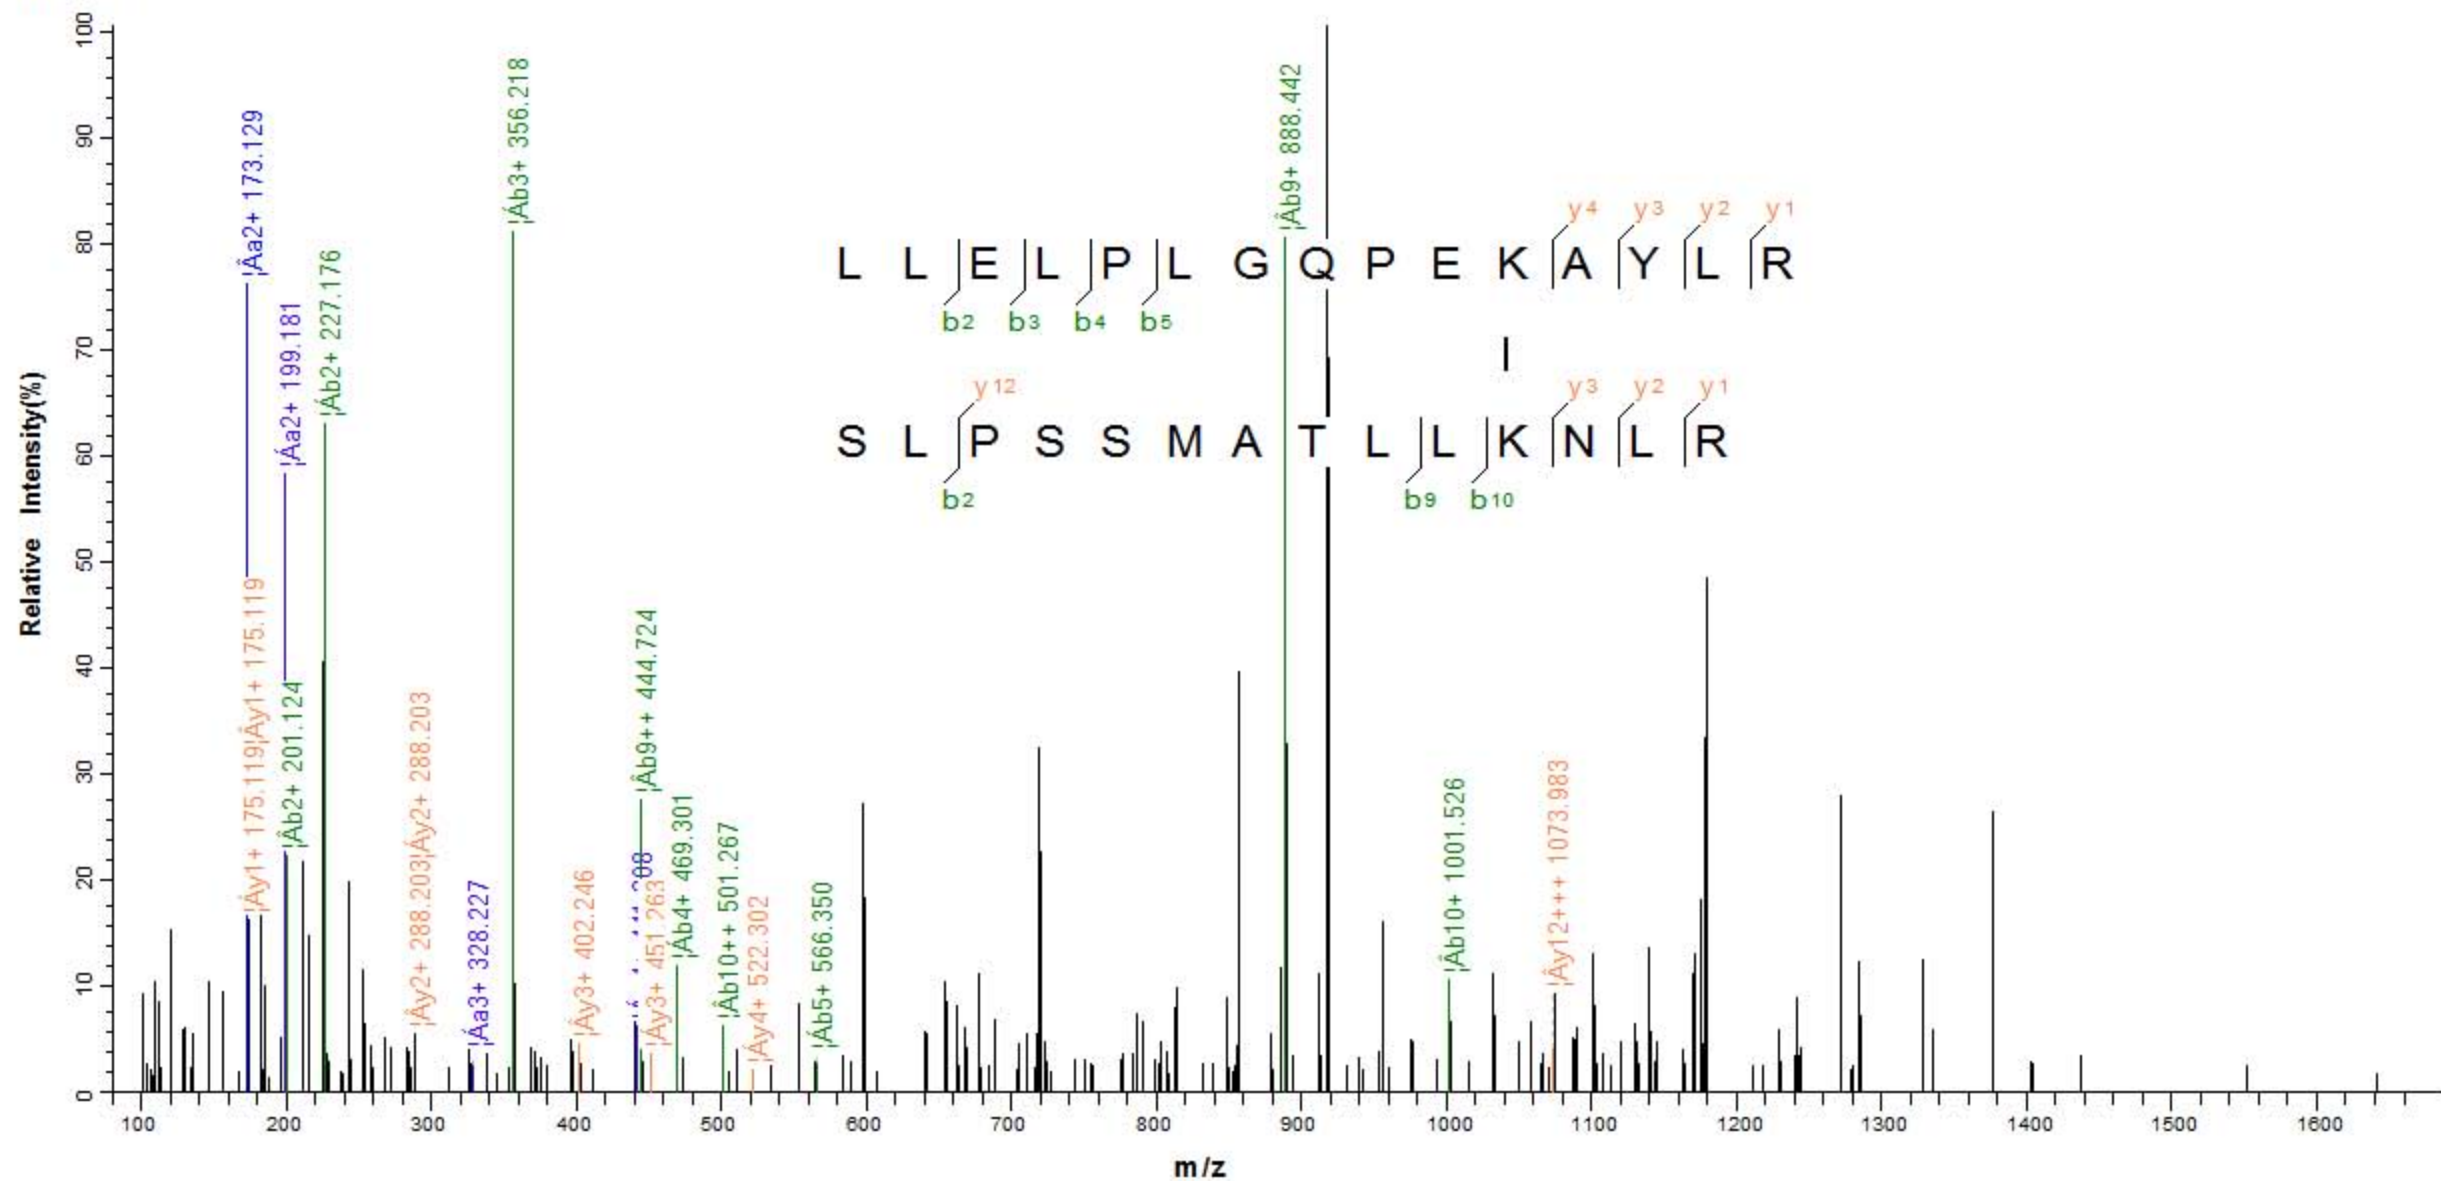

8.4e+003

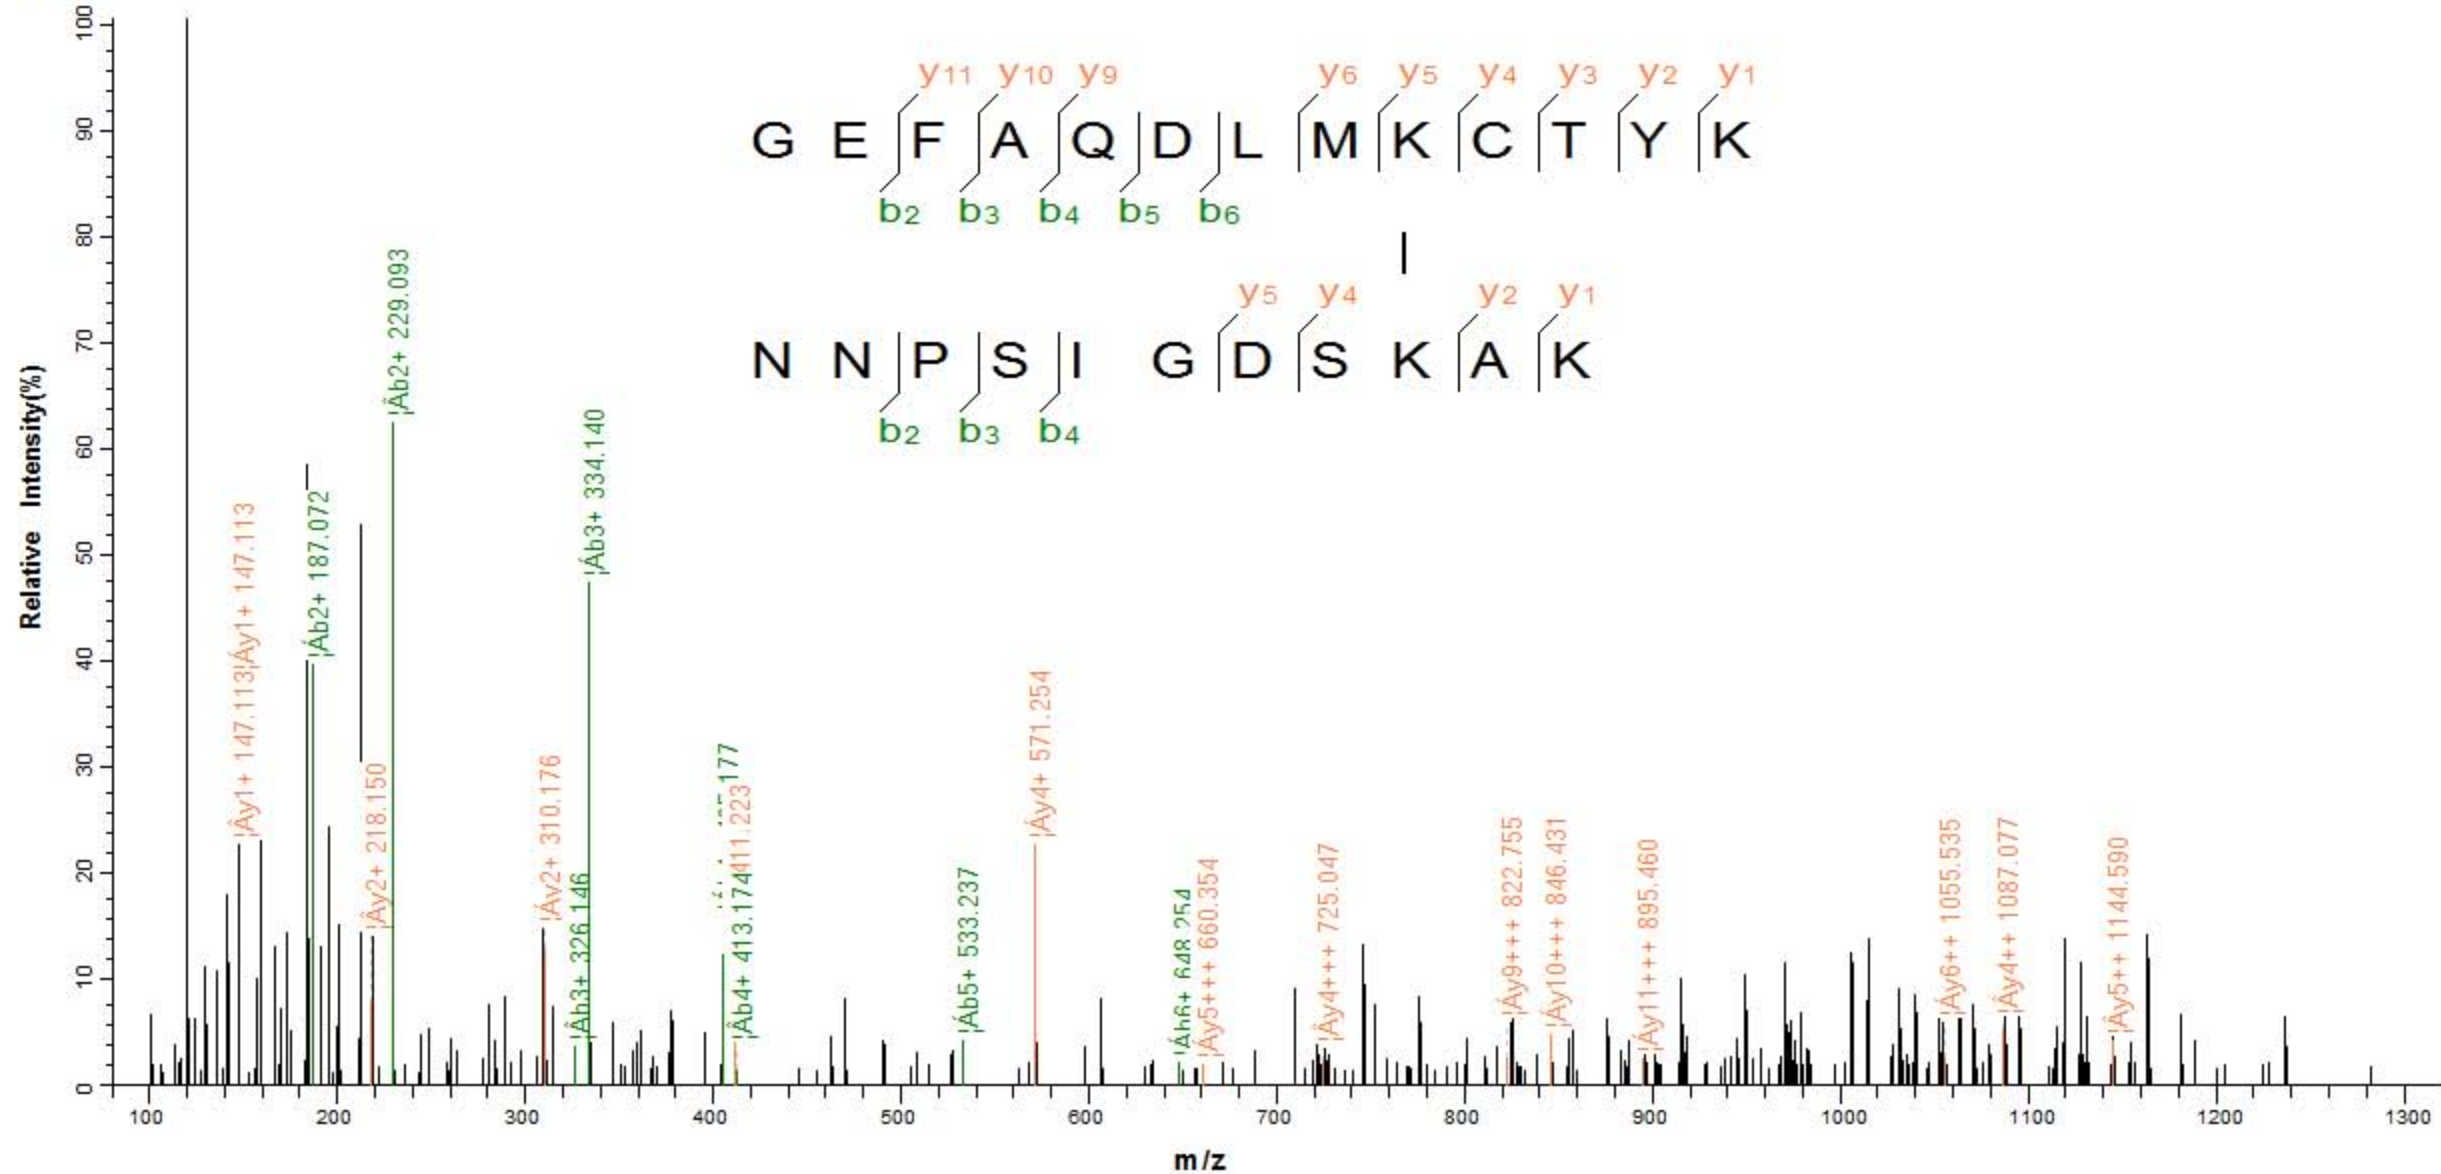

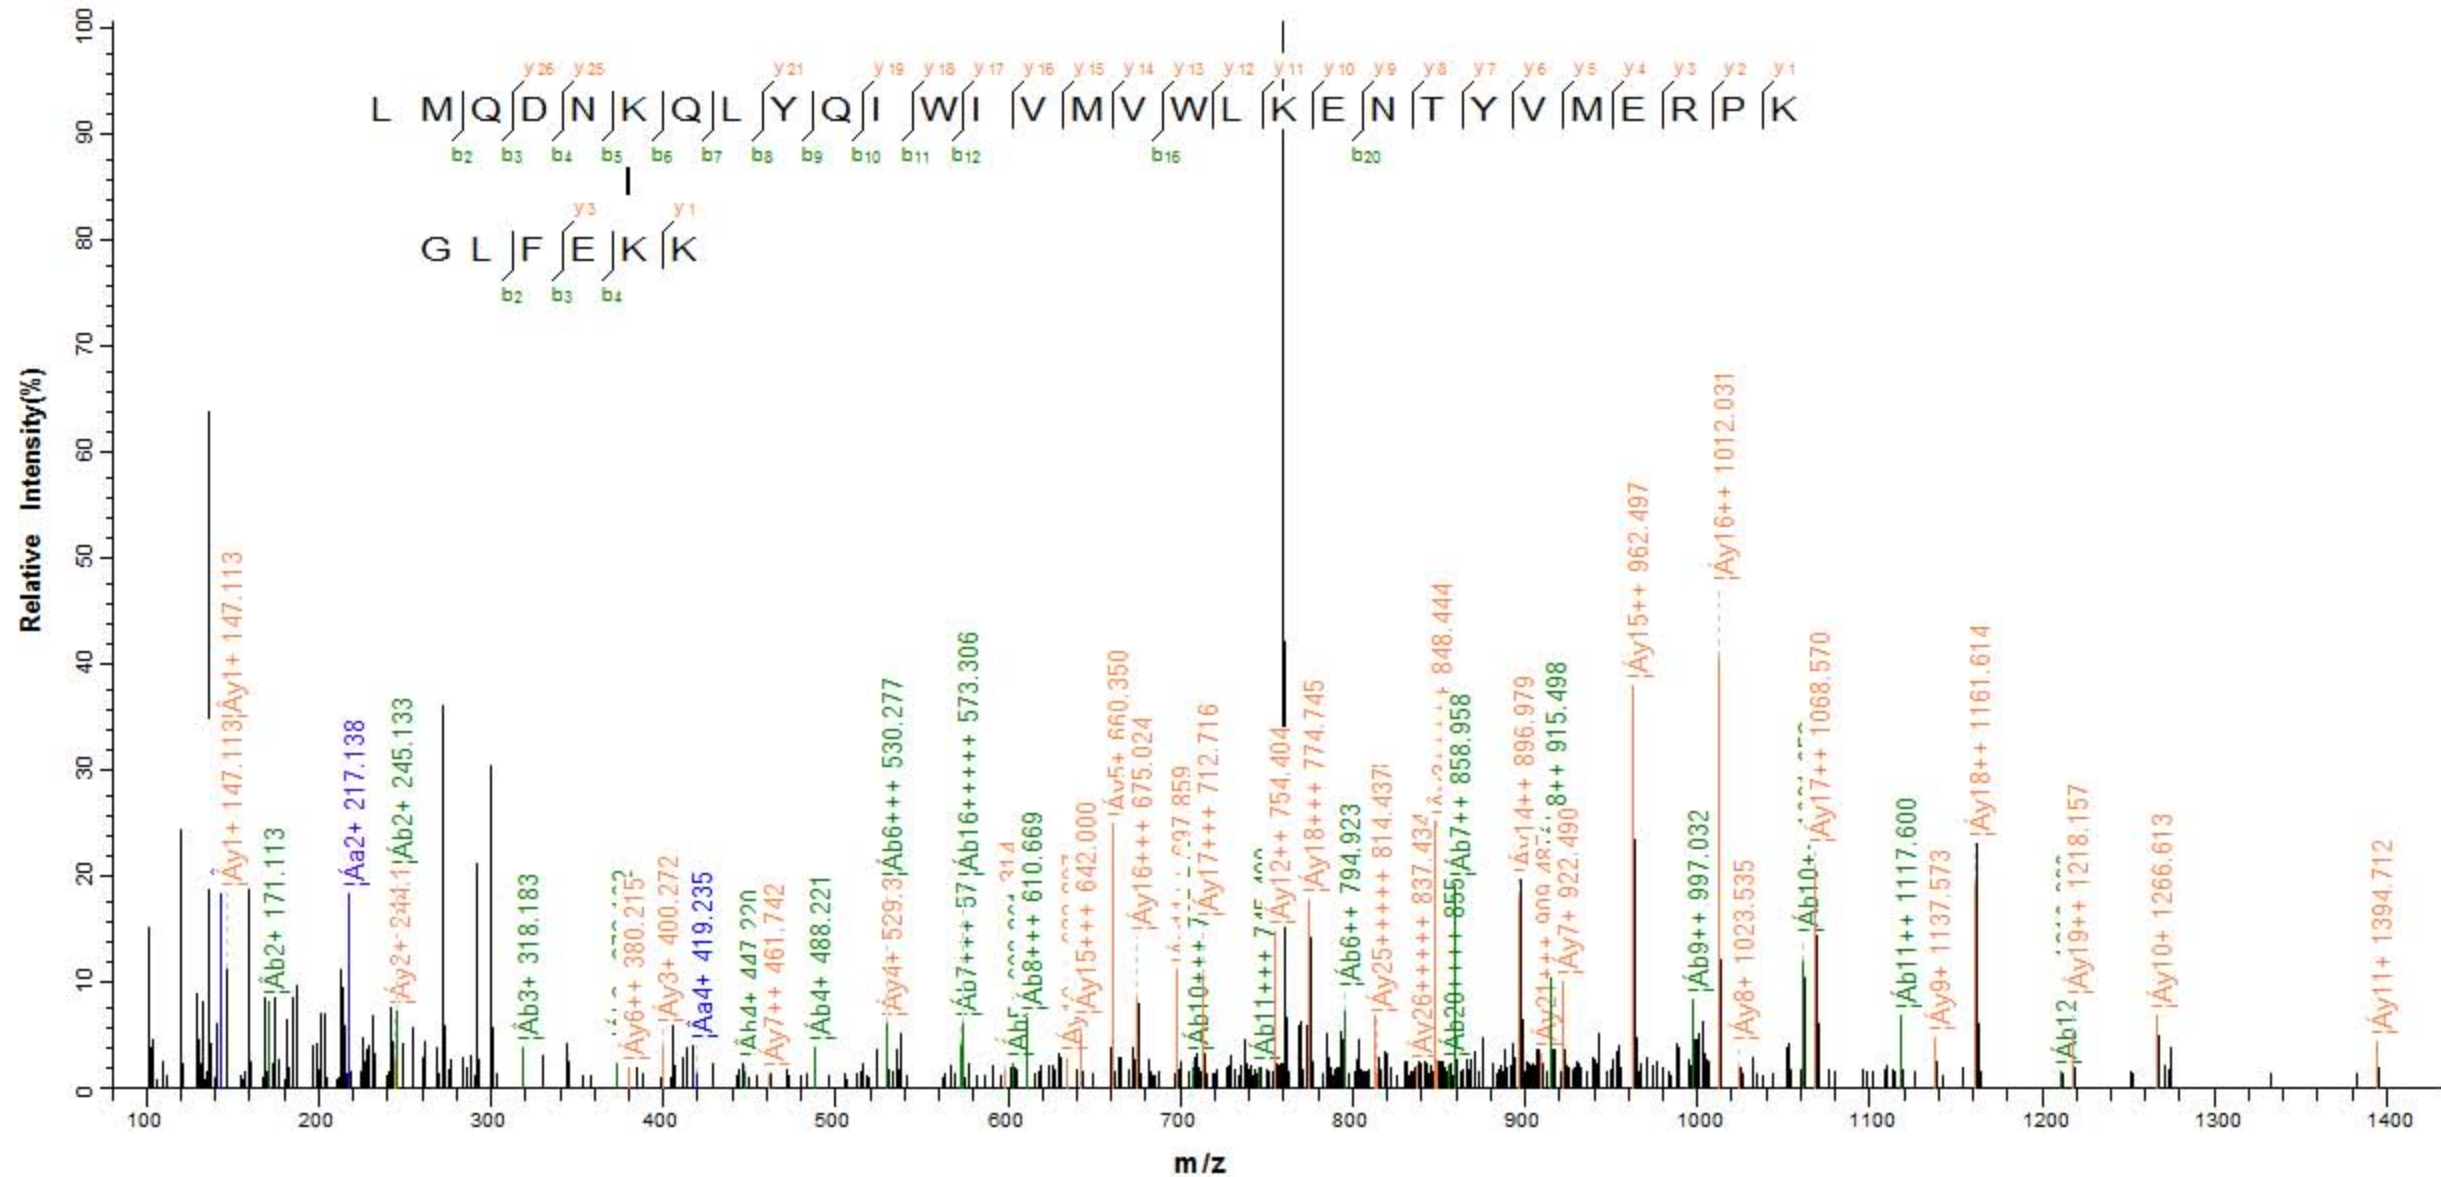

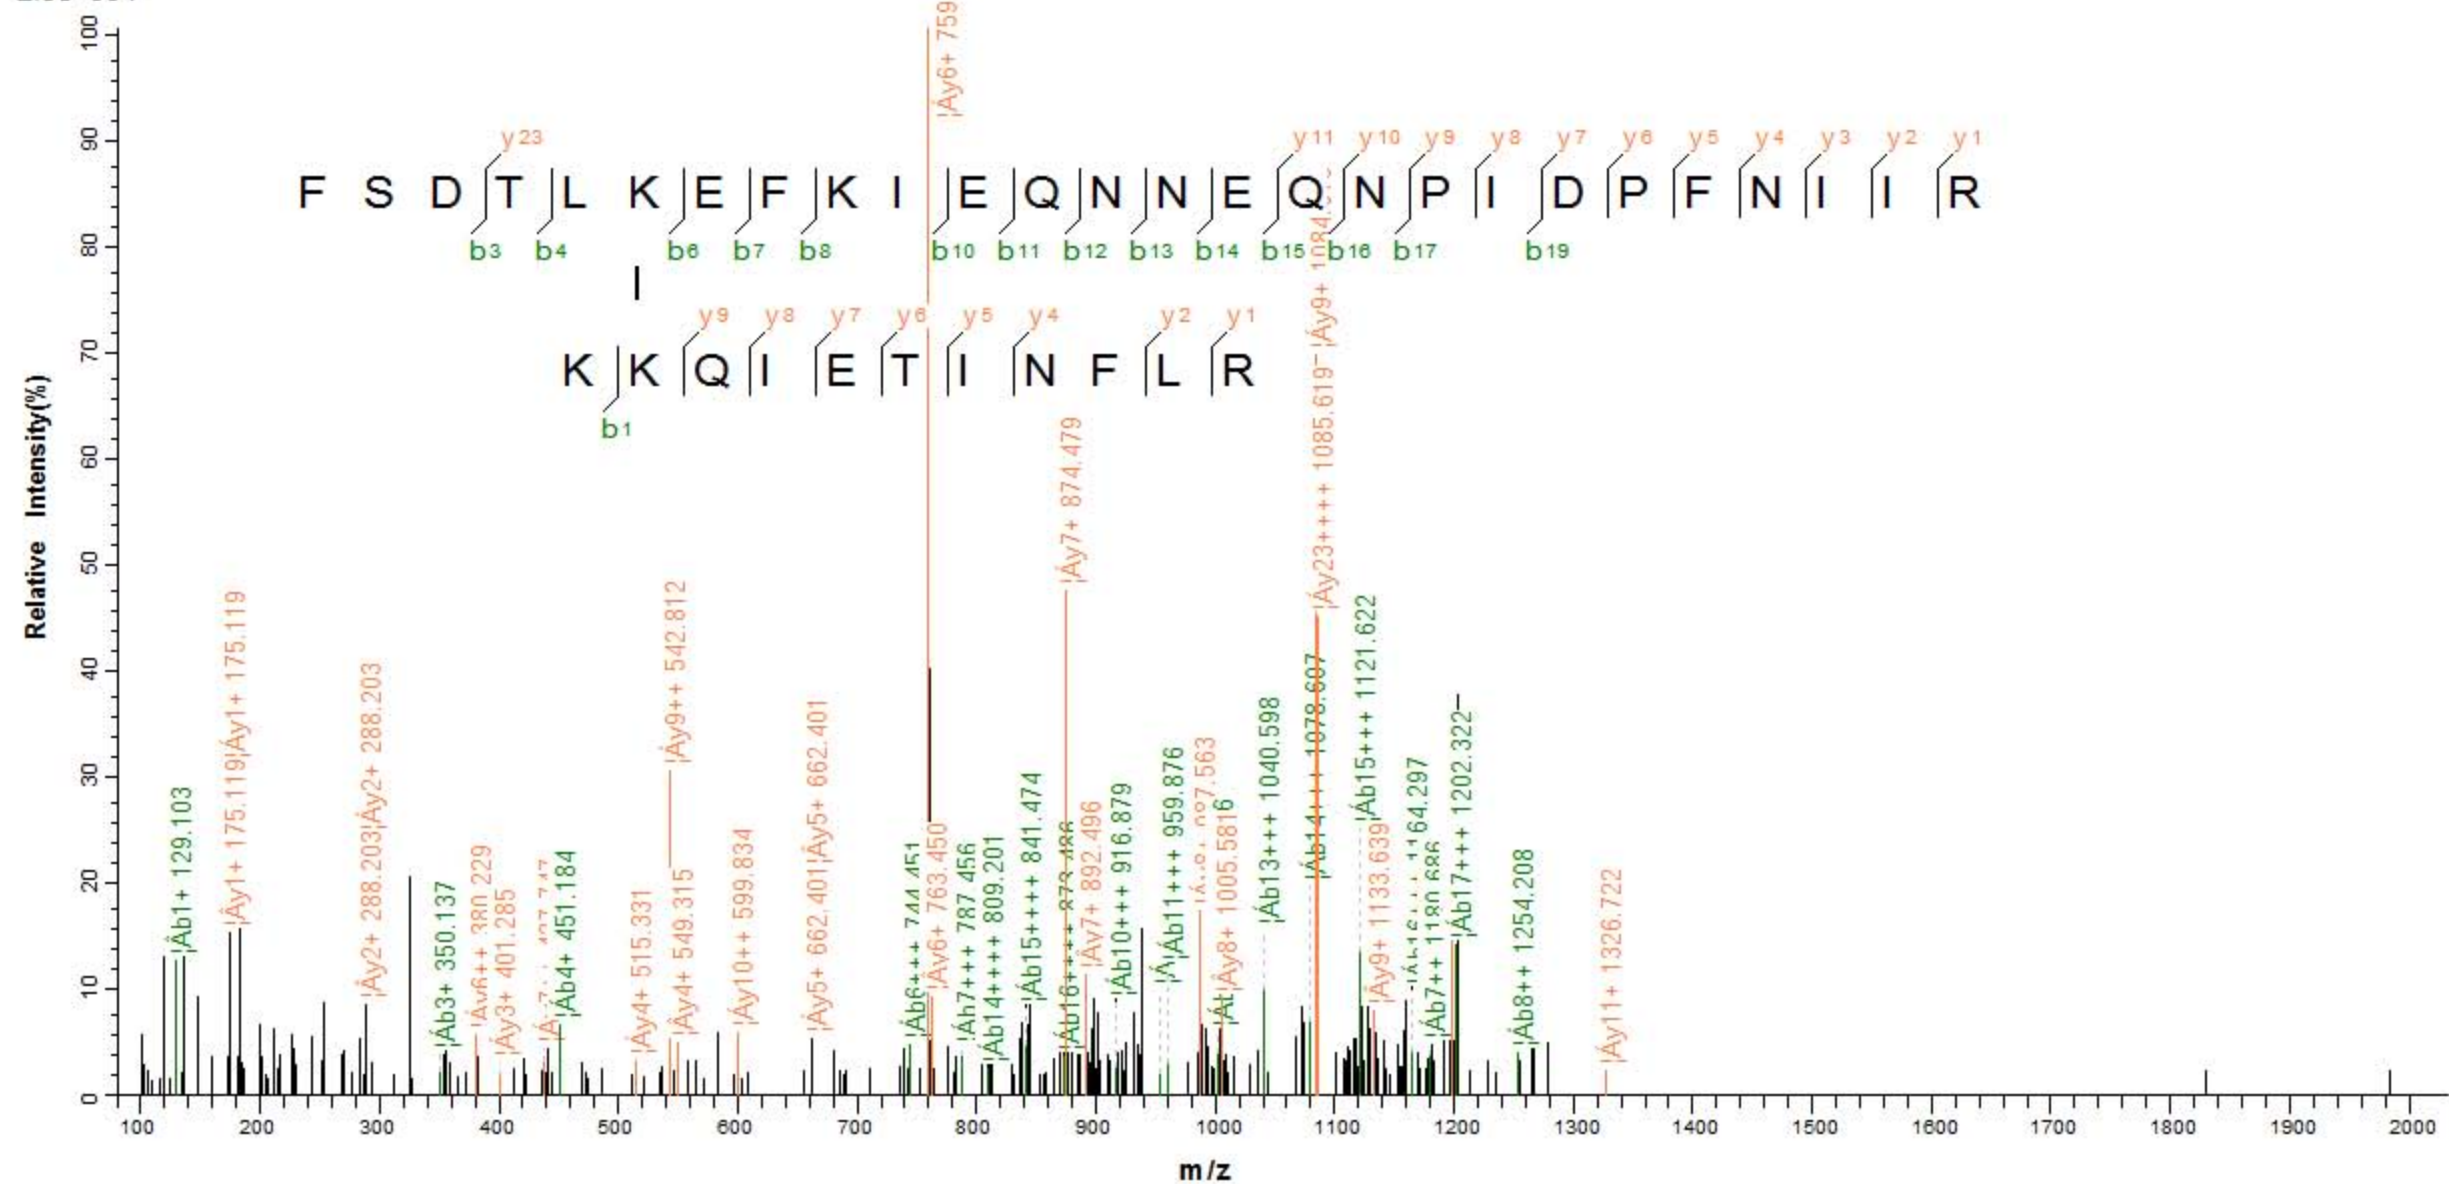



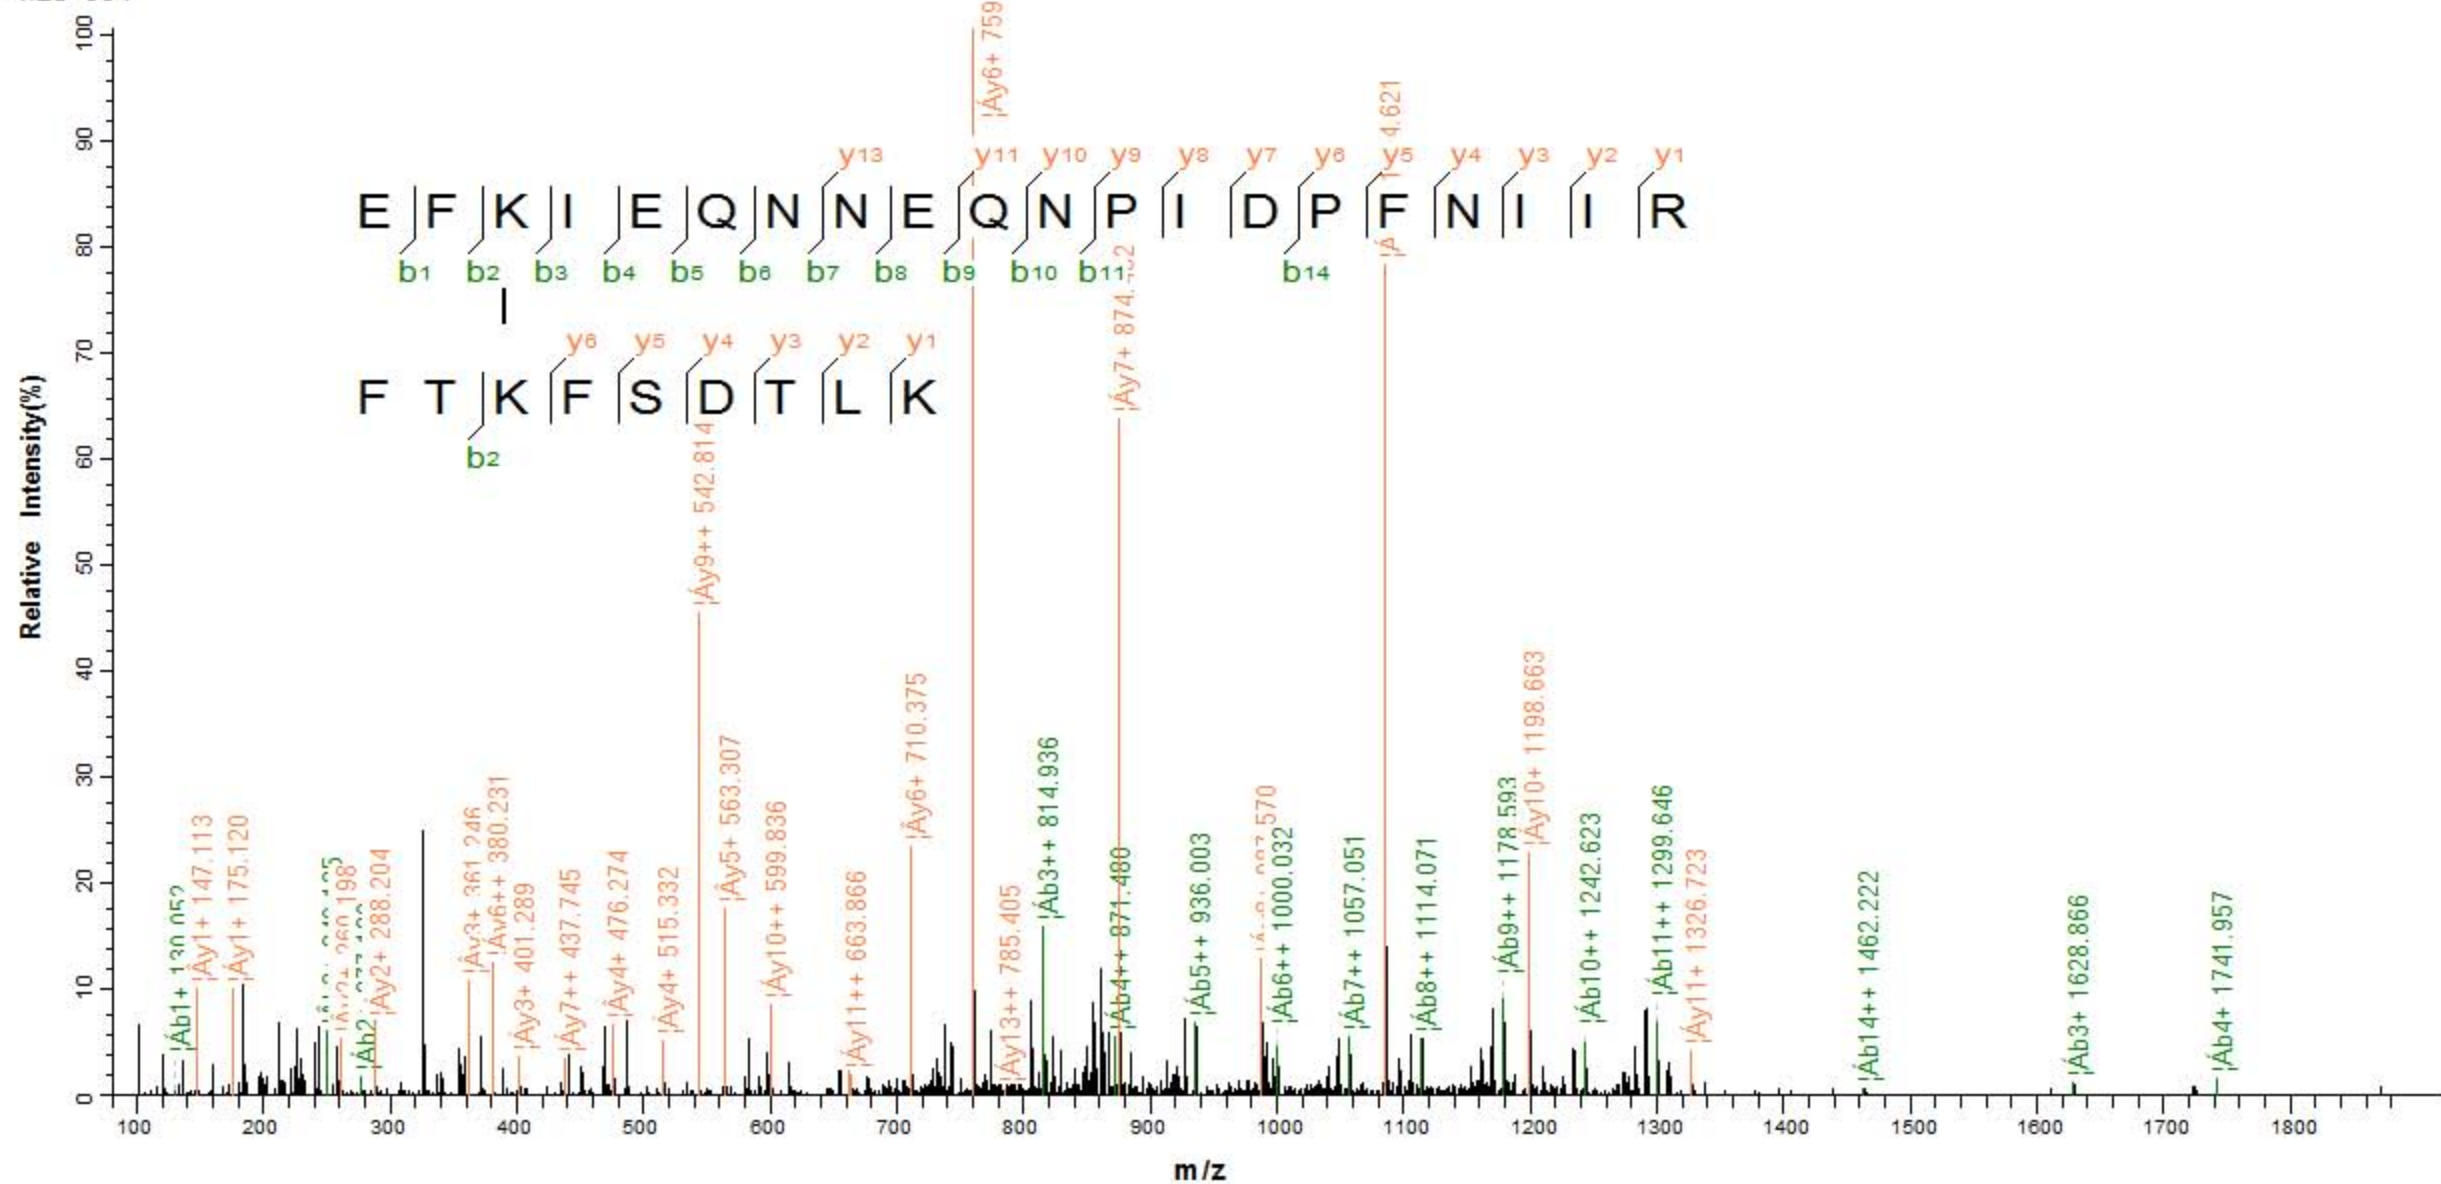

4.8e+004

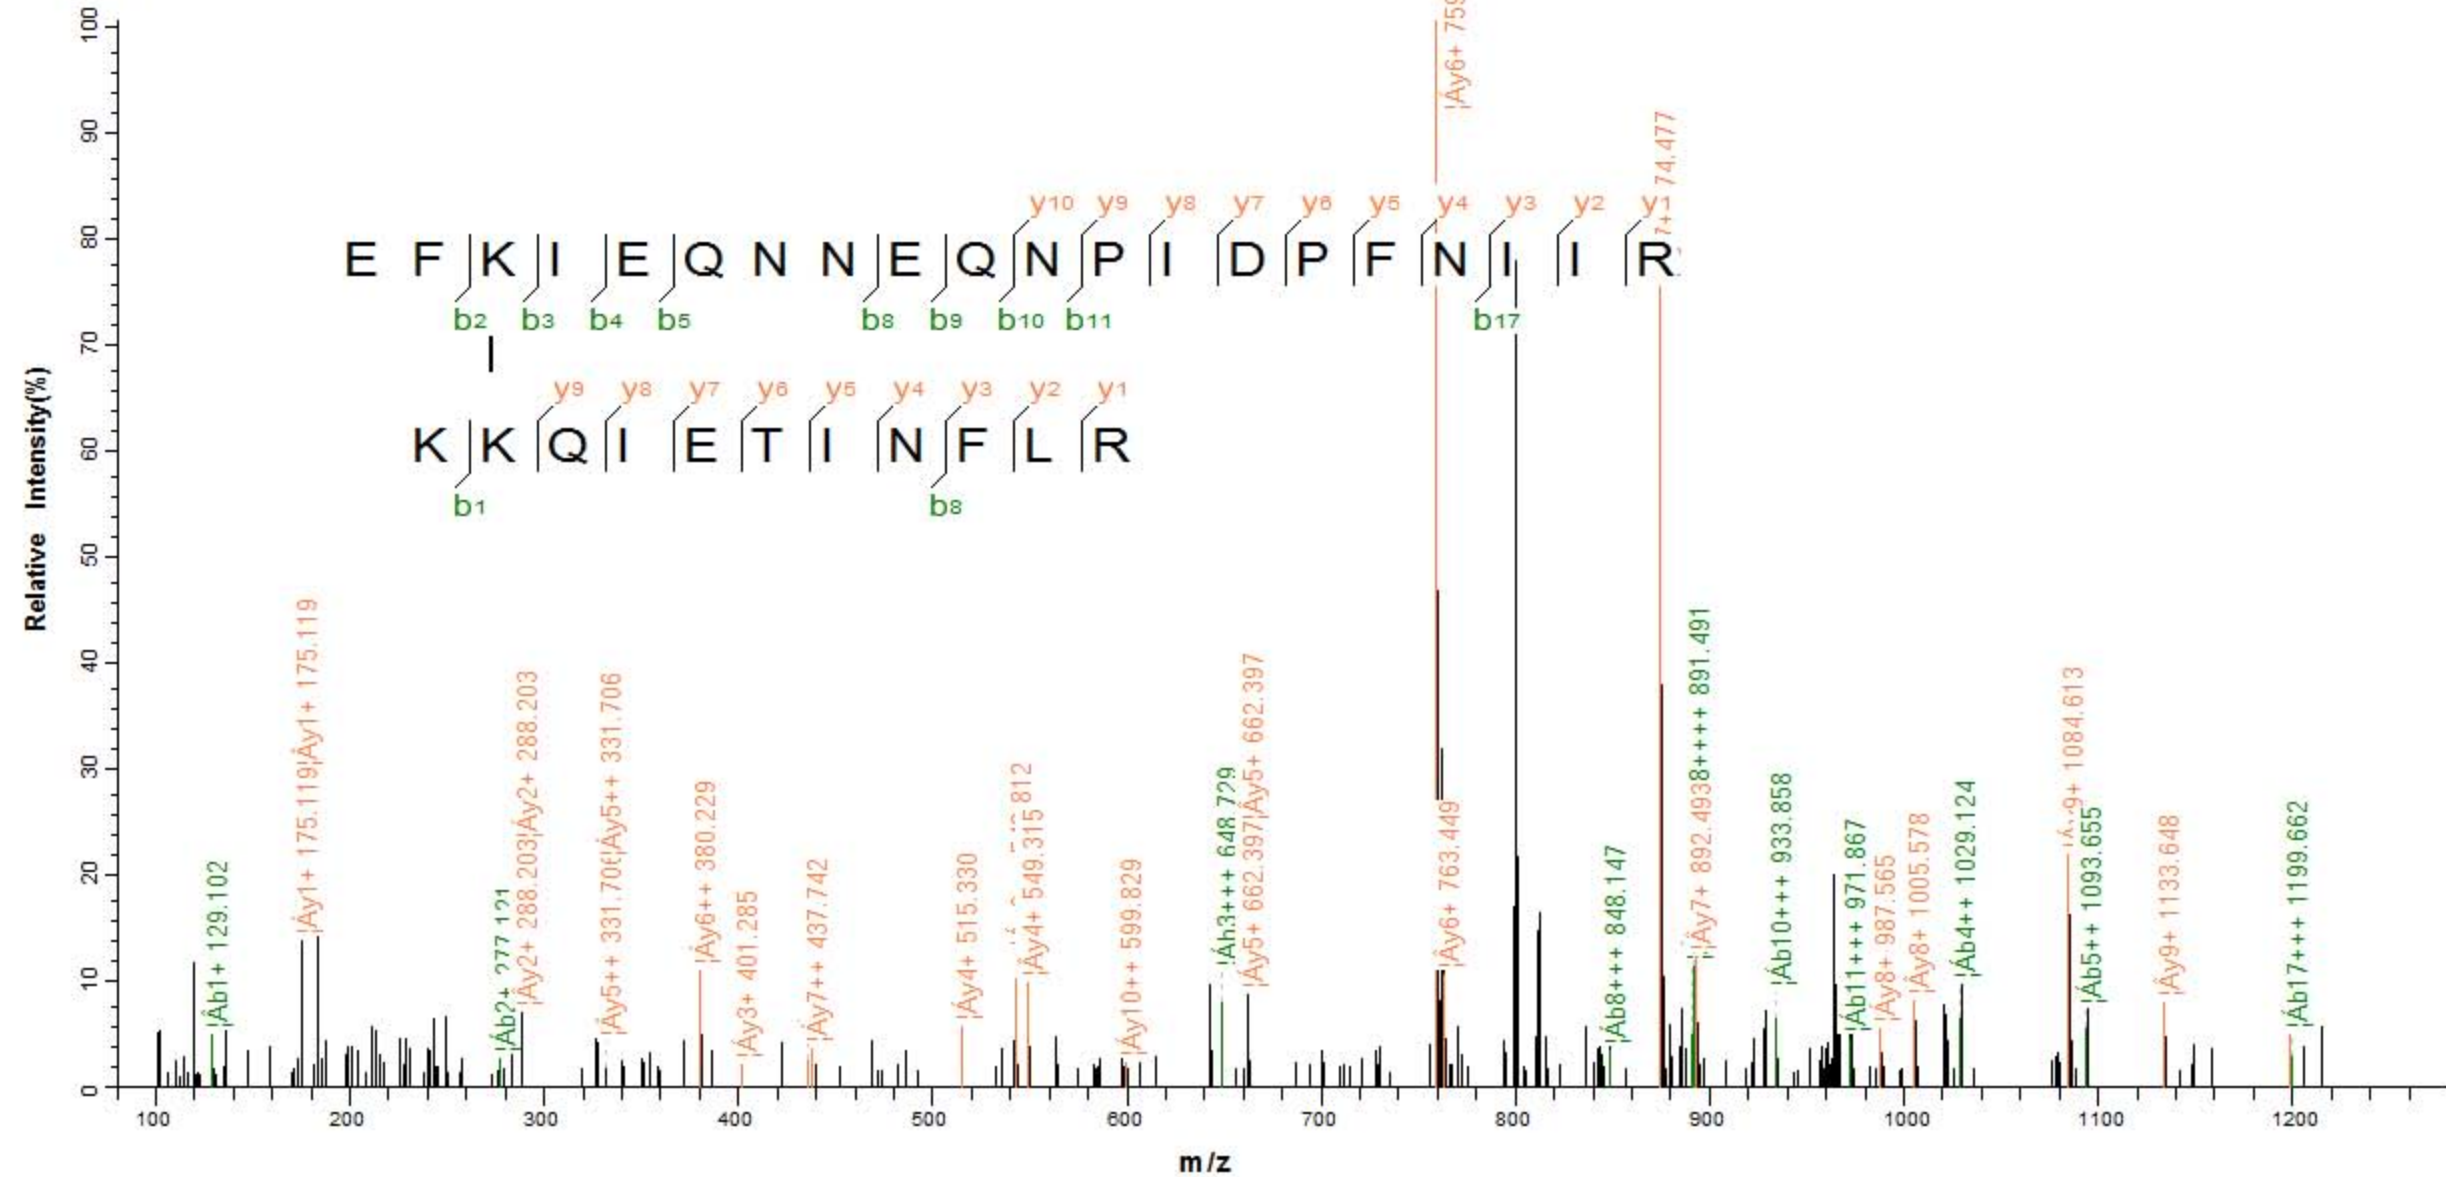

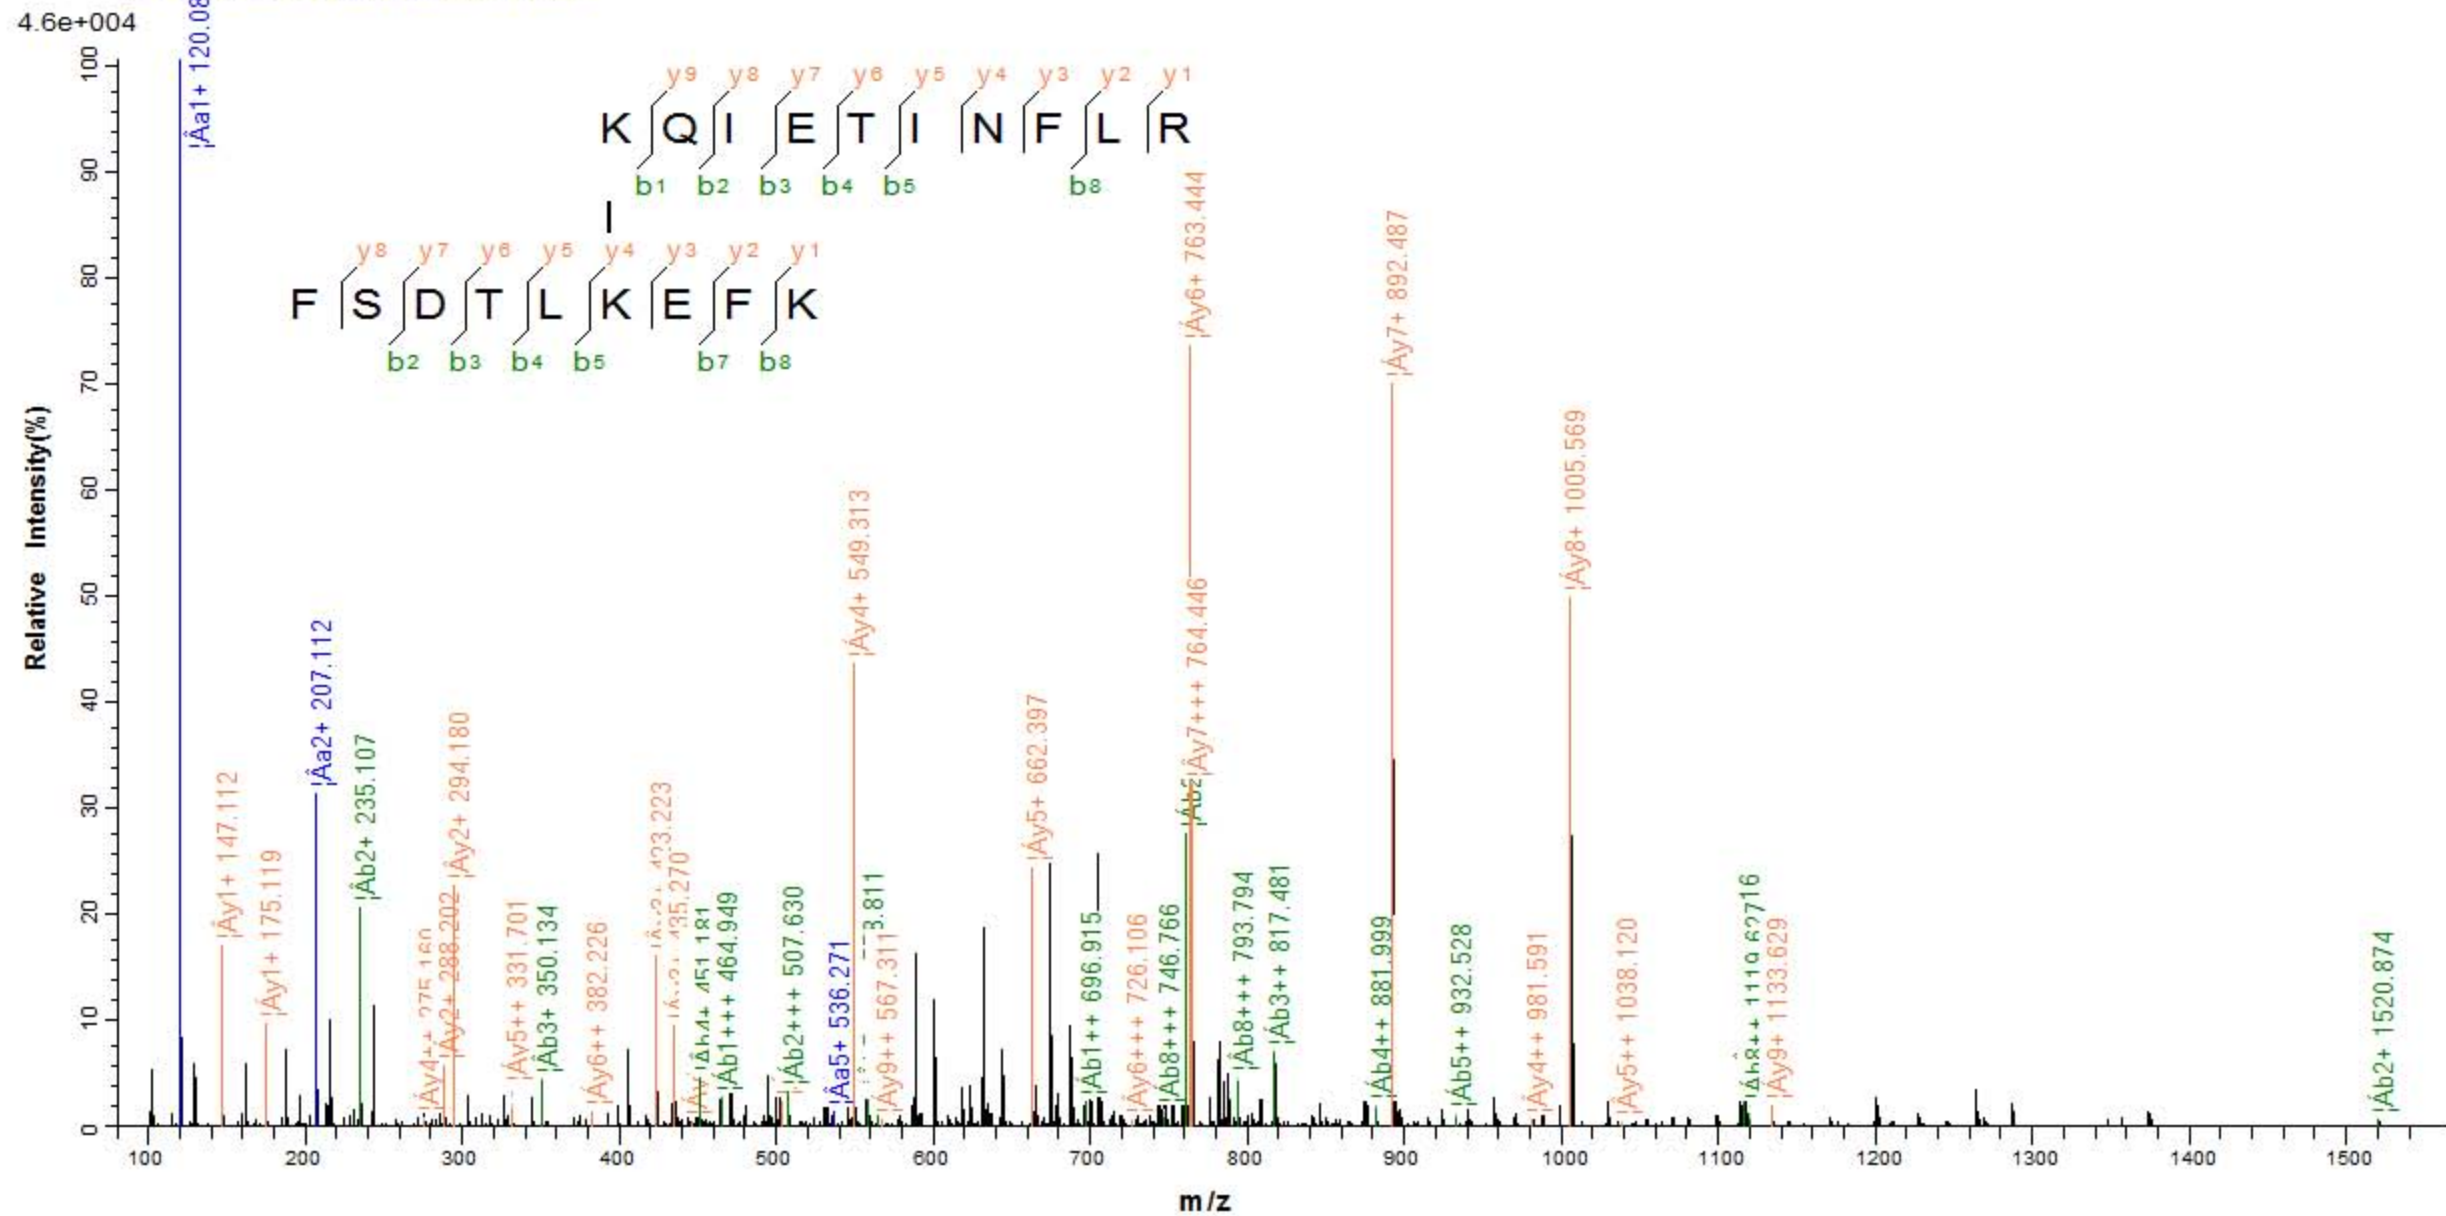

2.1e+004

Relative Intensity(%)

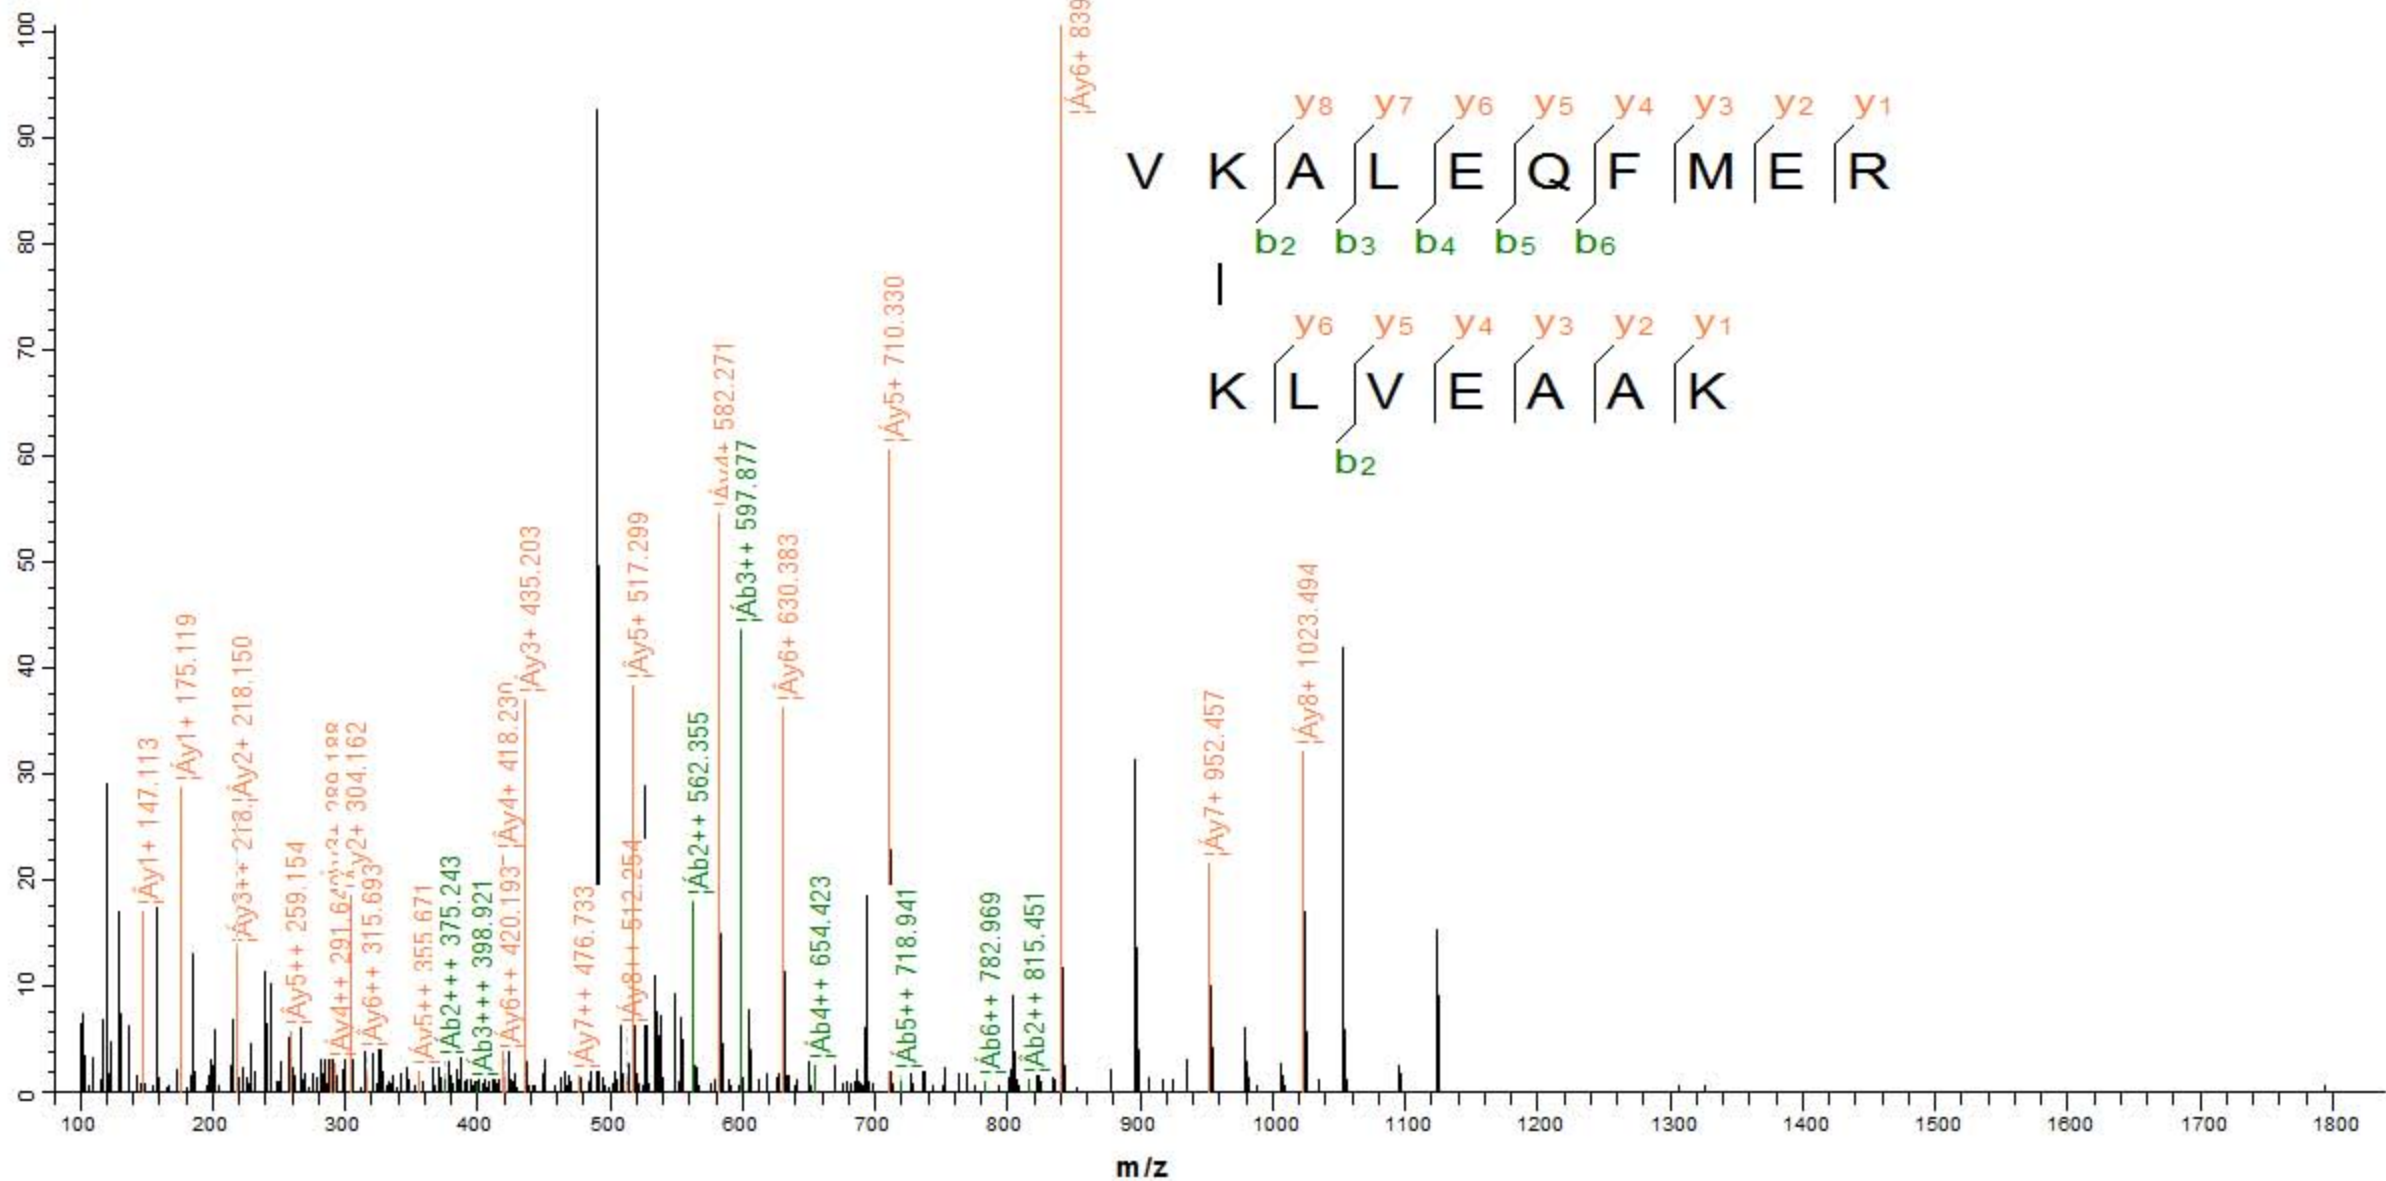

3.24e-016NEDQFLEEITQYEHLIK-VKALEQFMER

6.5e+003

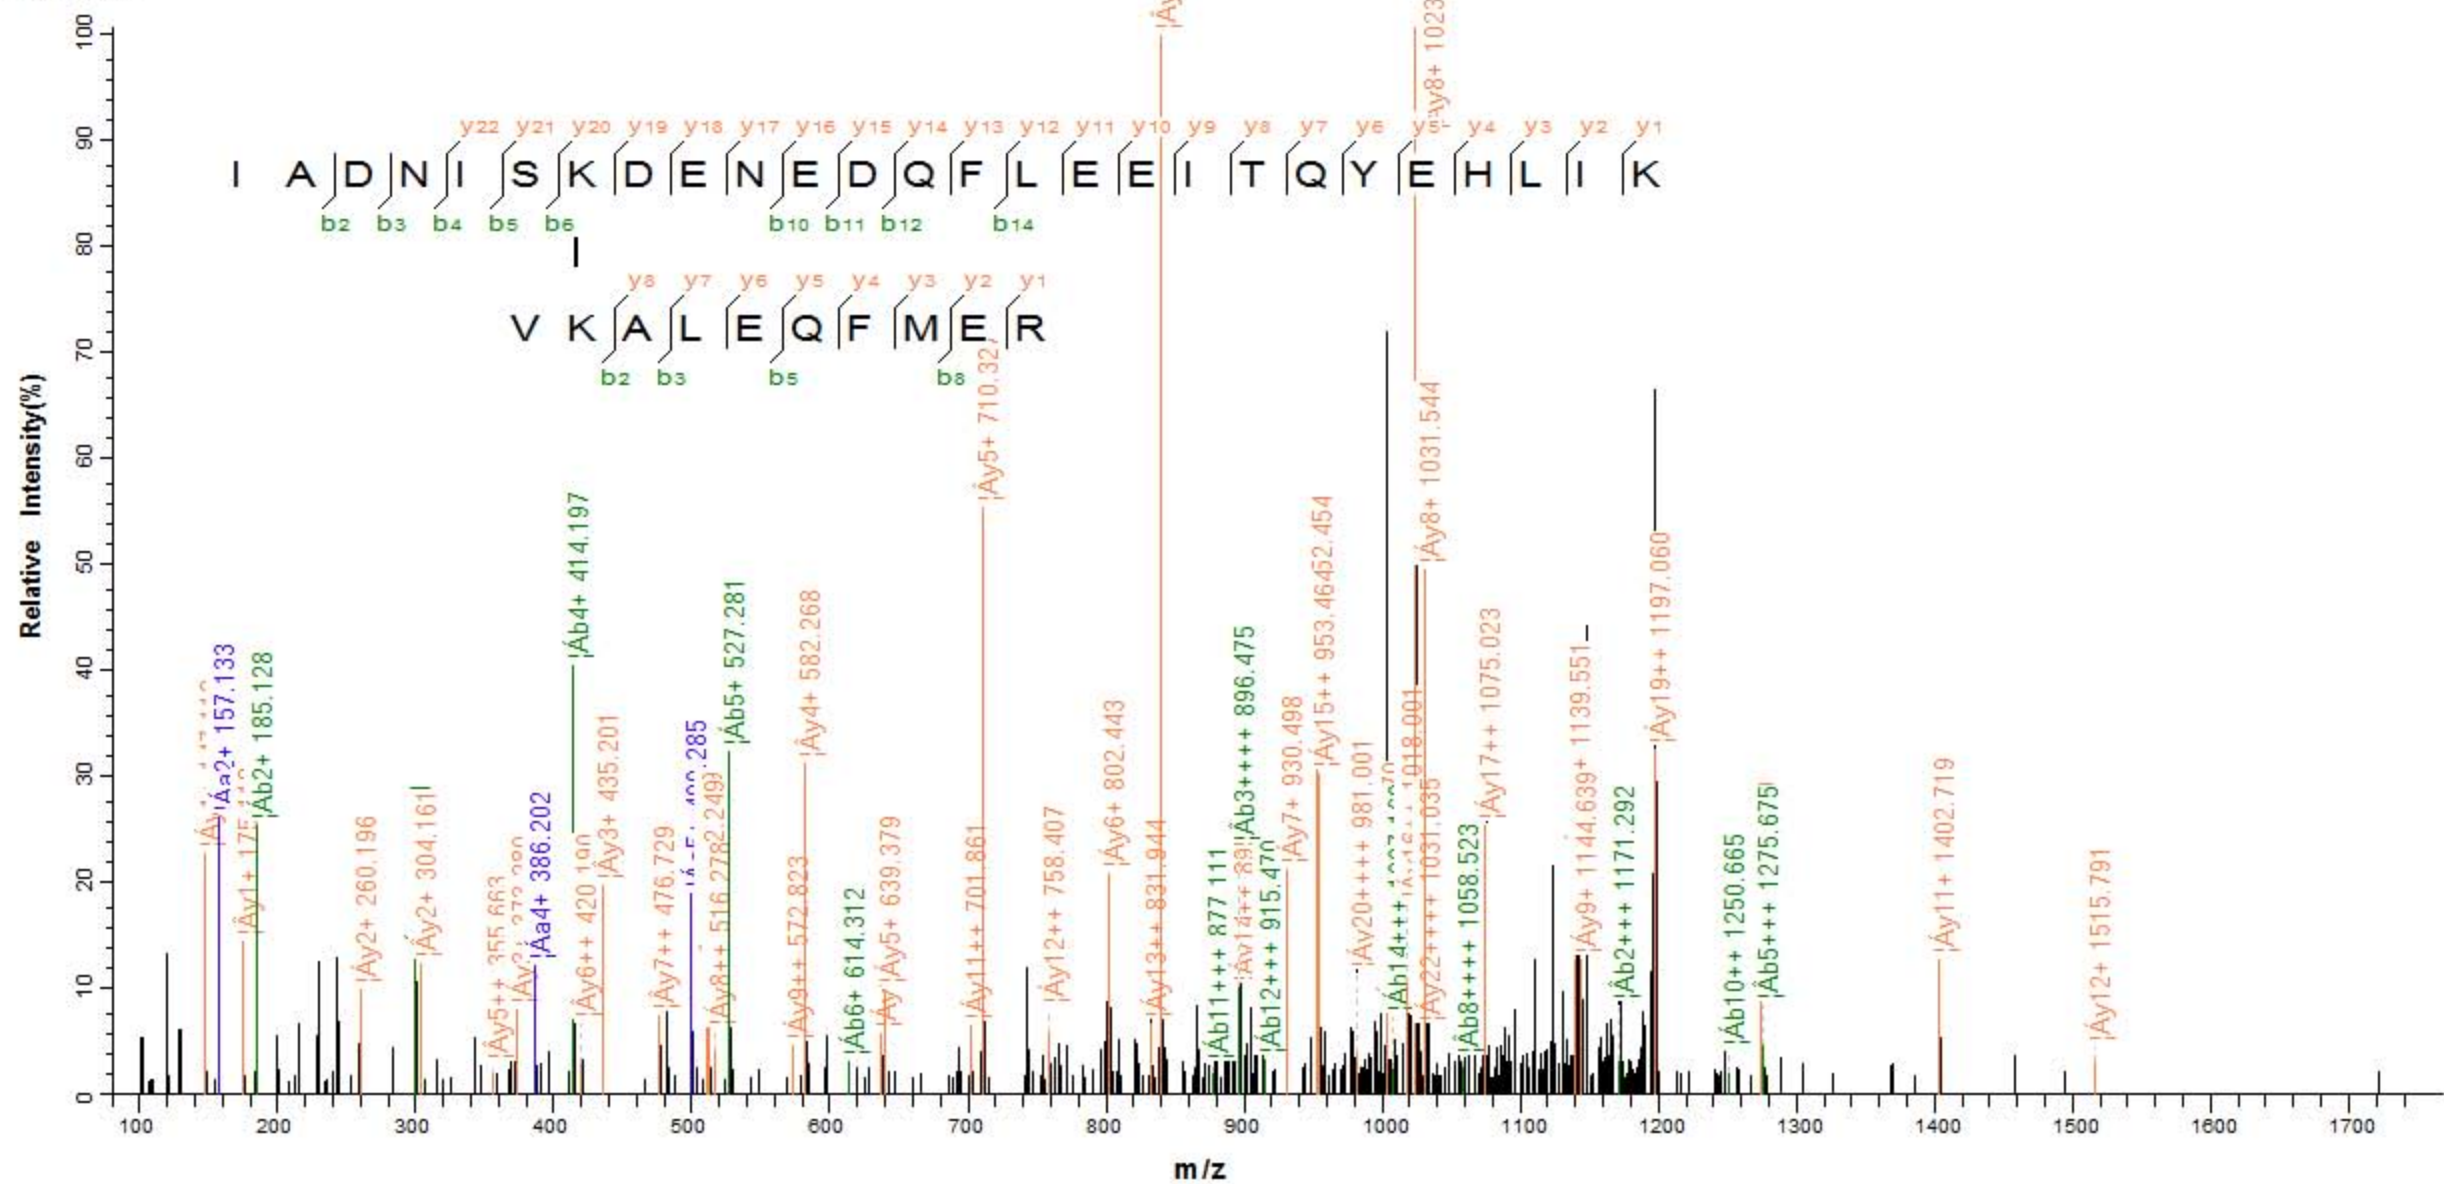

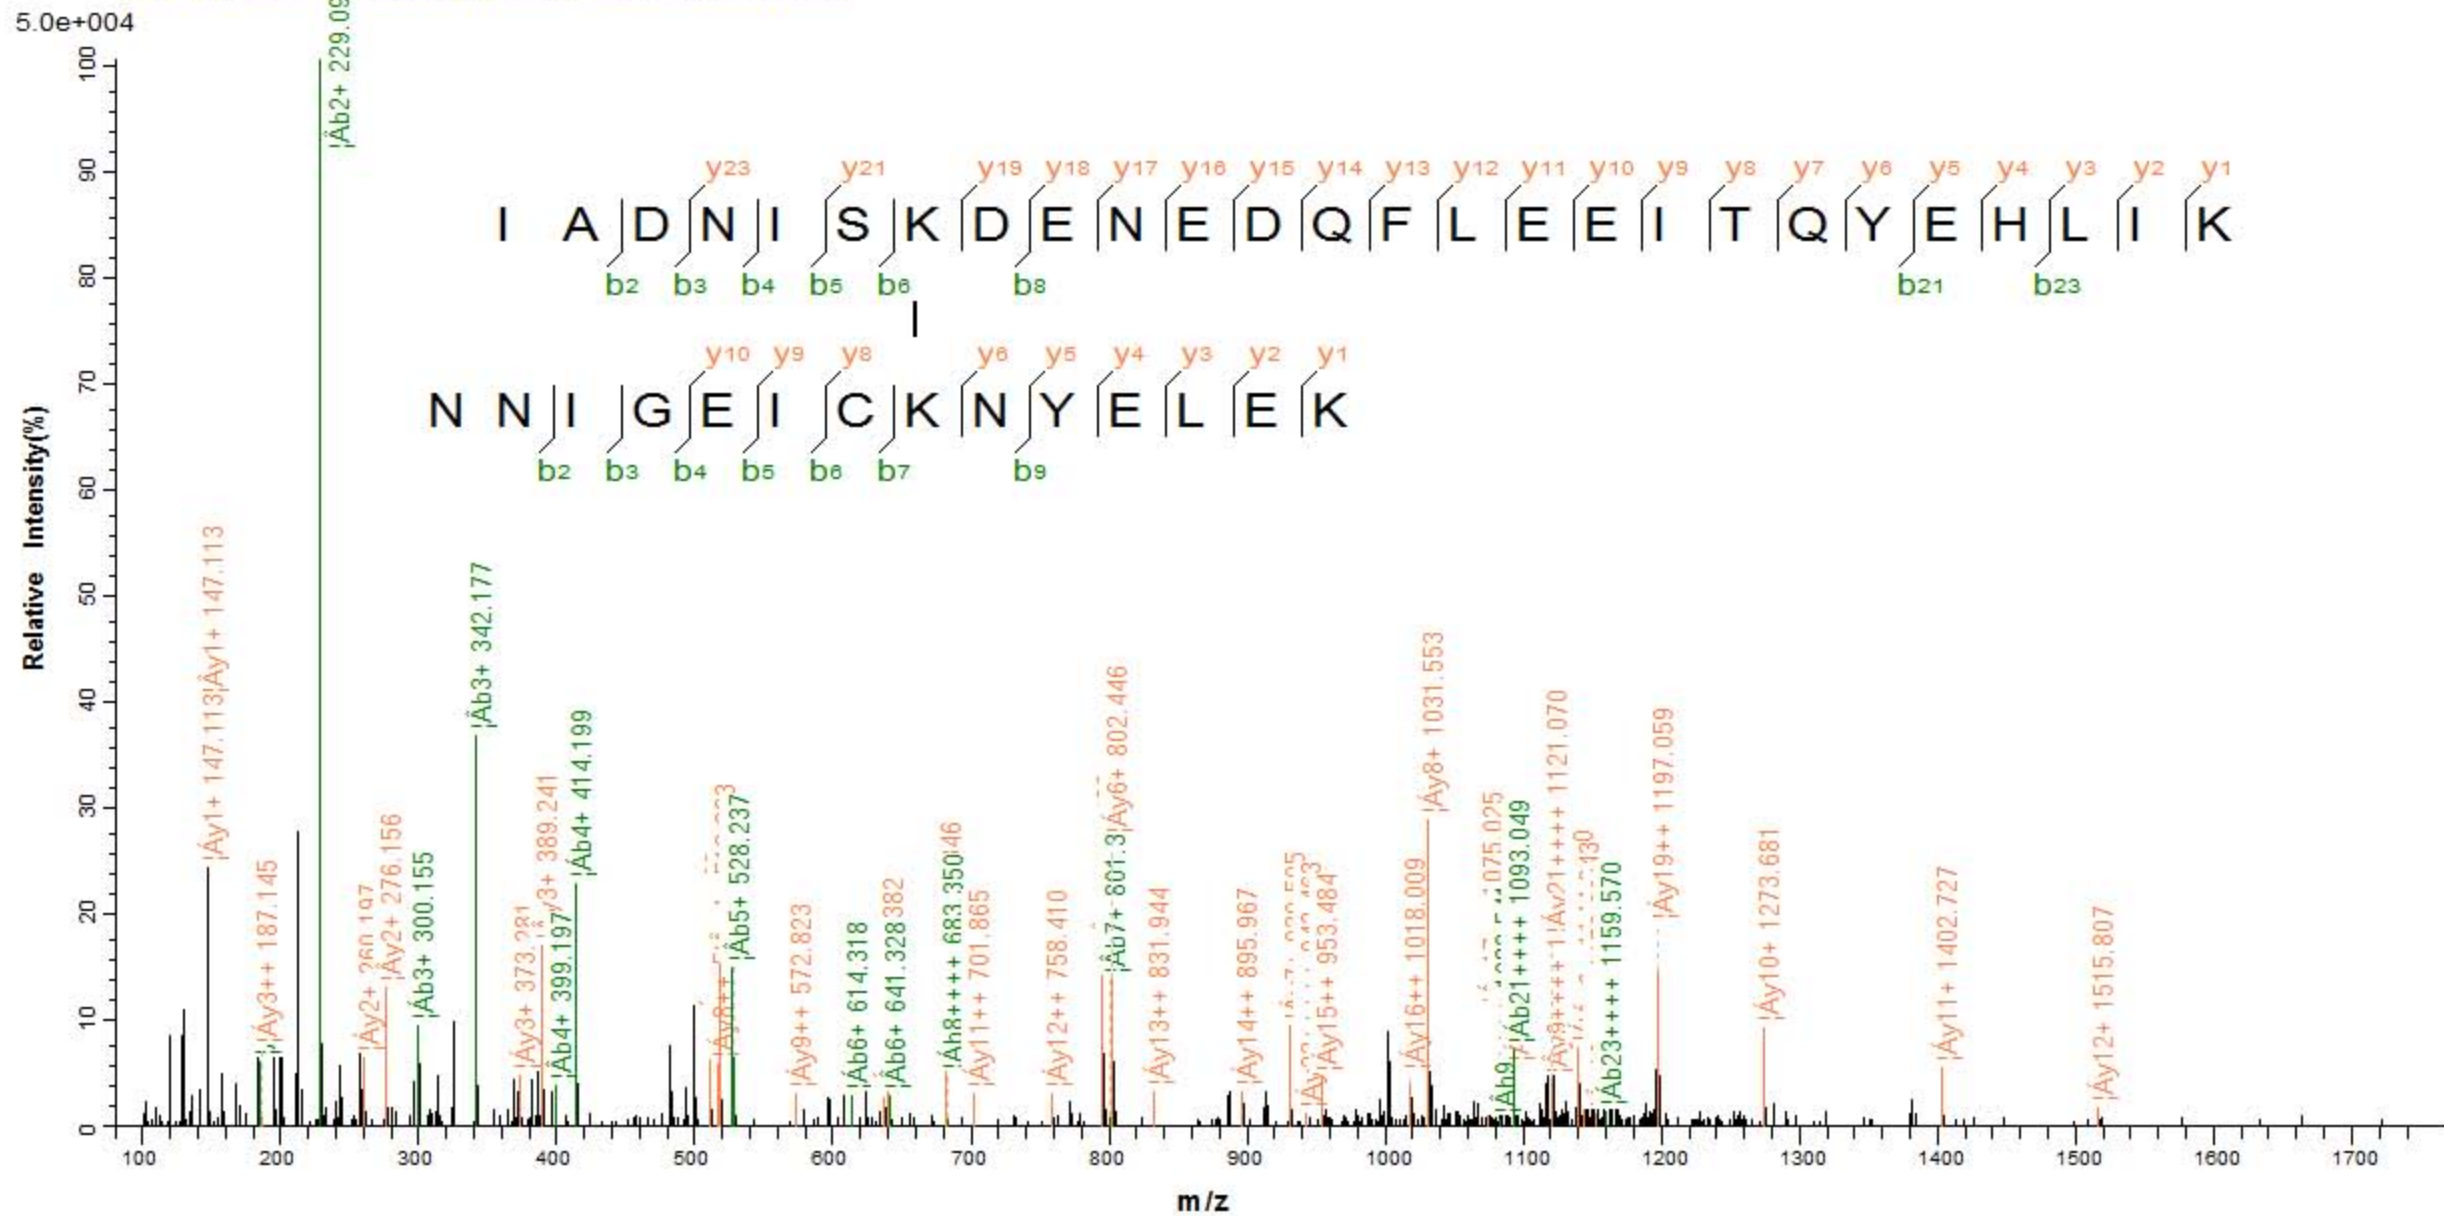

9.69e-008NEDQFLEEITQYEHLIKGIR-NNIGEICKNYELEK

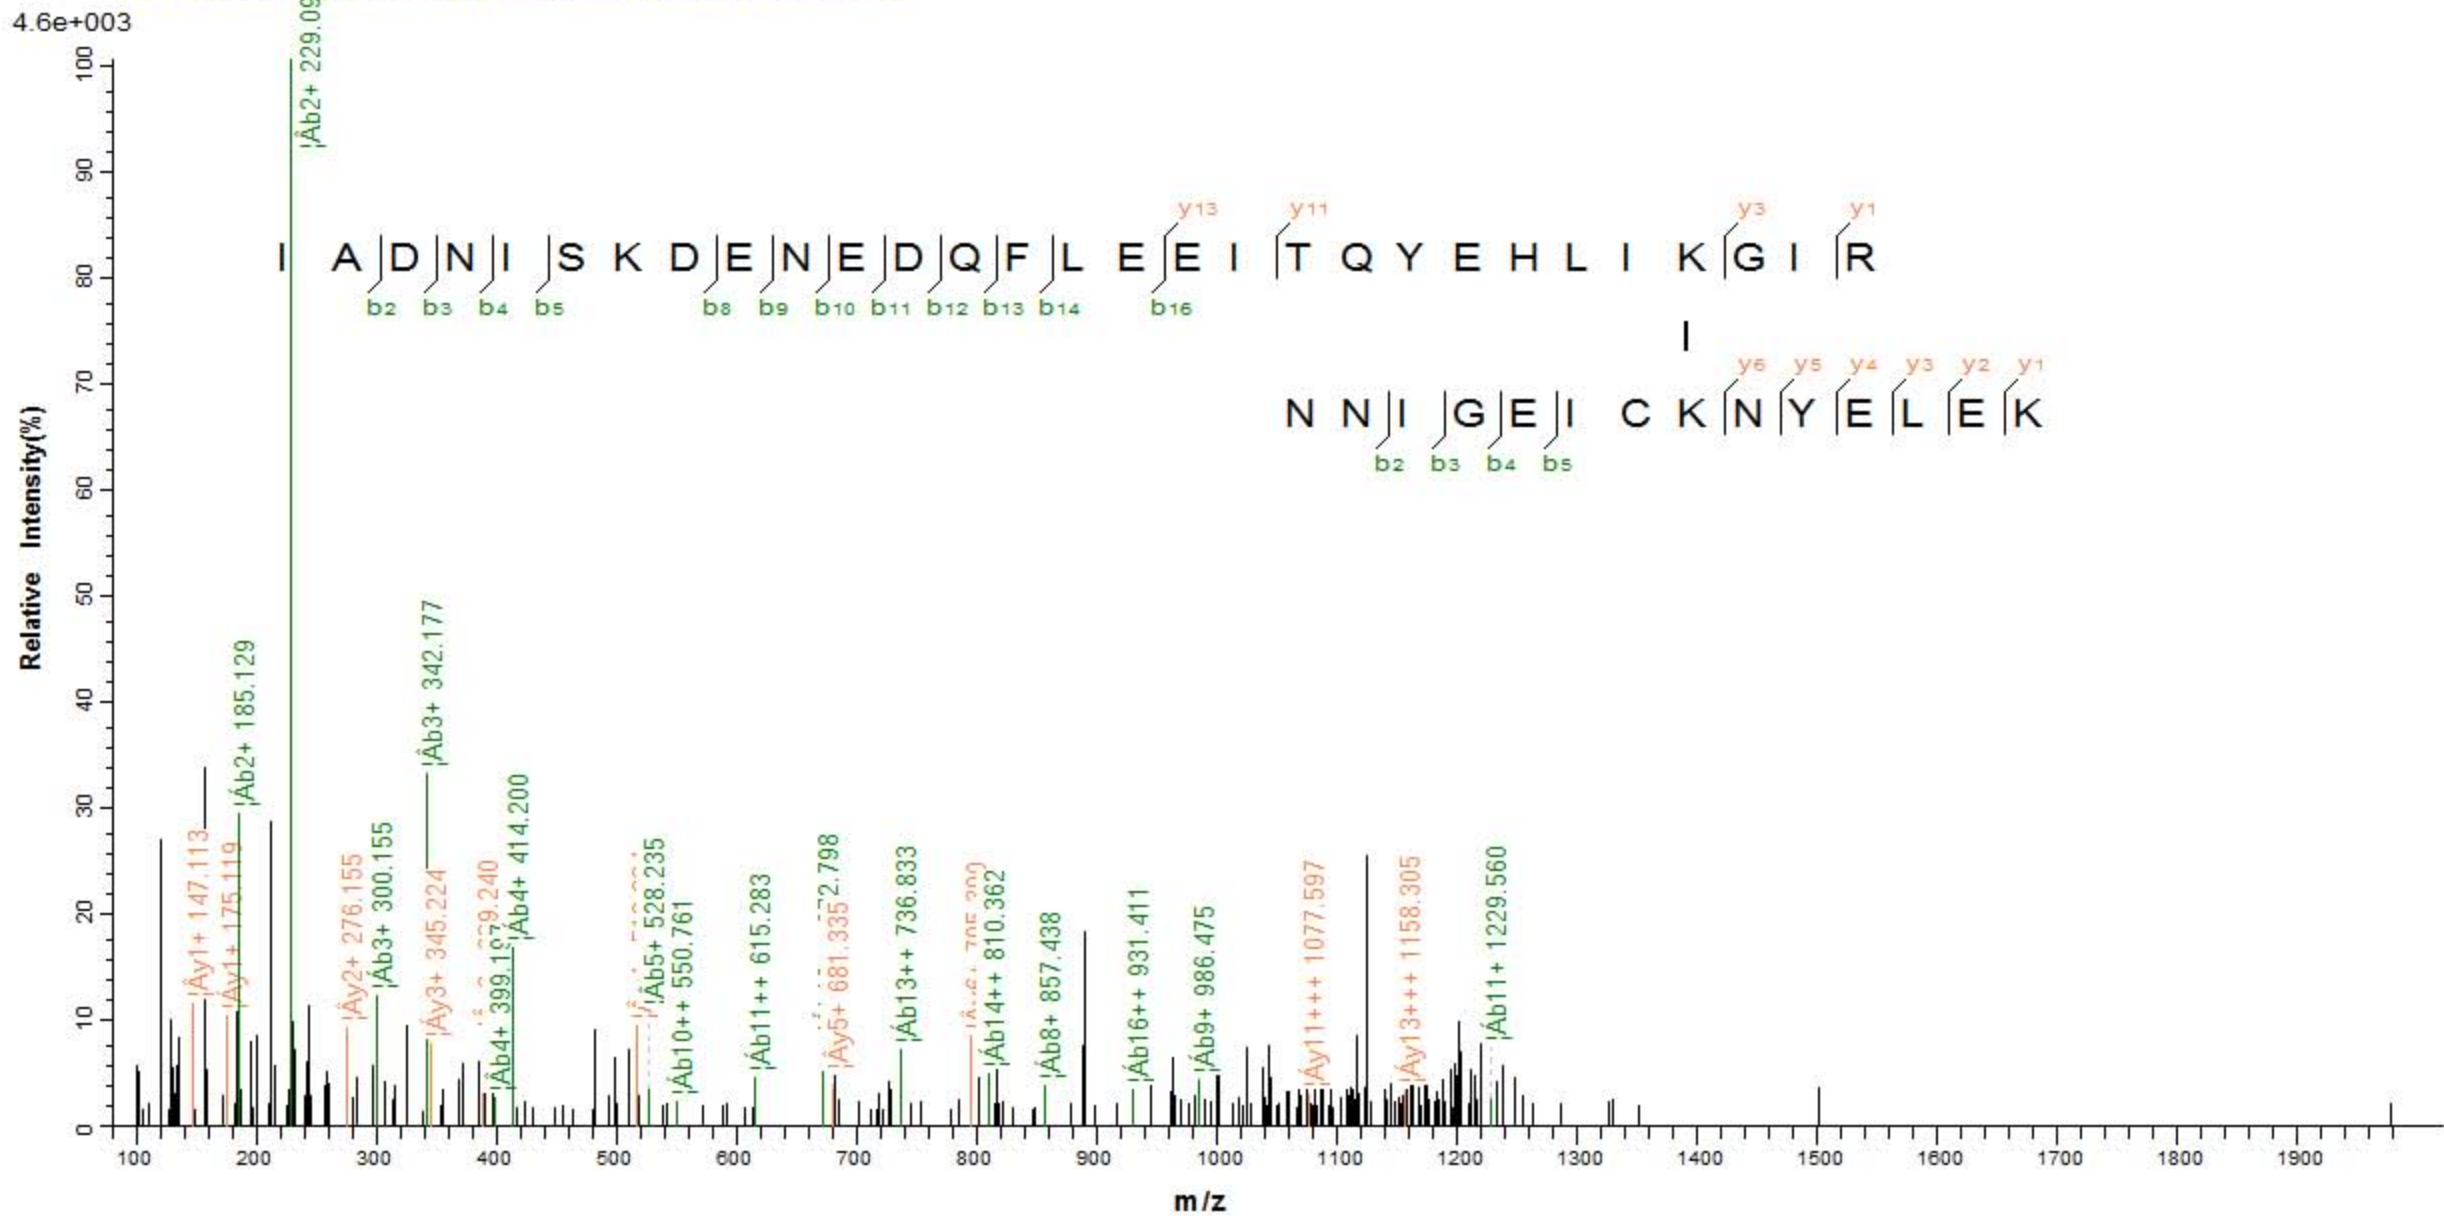

1.22e-008NEDQFLEEITQYEHLIKIR-LQGFSDKTFELIK

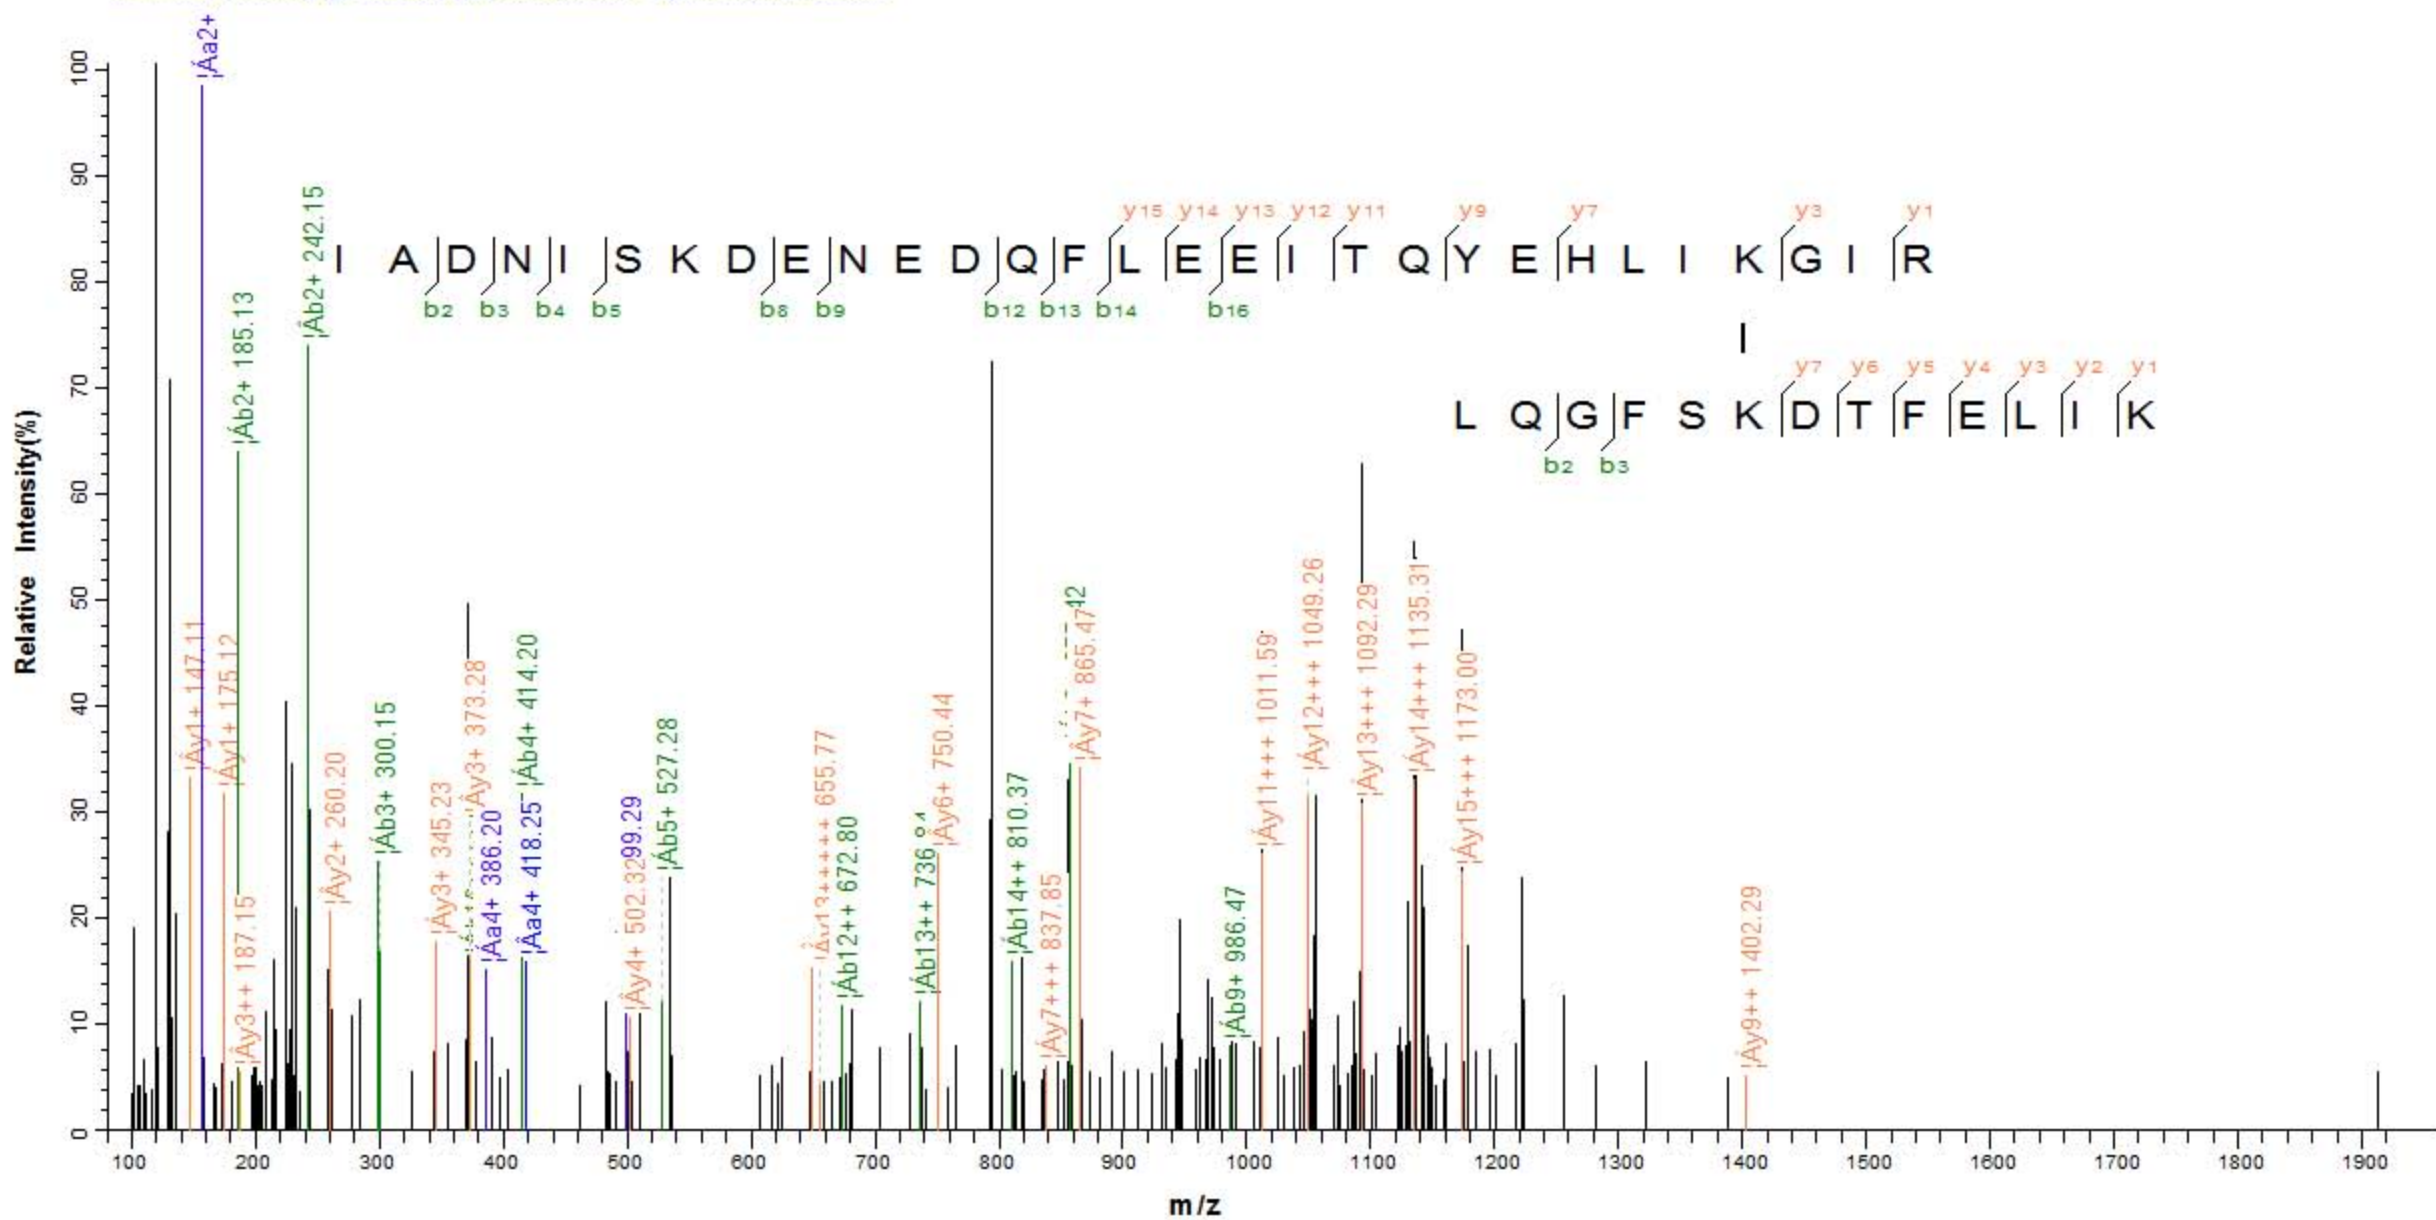



3.9e+004

Relative Intensity(%)

E Y E E W Q K S V S L L S S E S N I P T L I E K  
 b2 b3 b4 b5 b6 b7 b9 b10 b16  
 y15 y13 y12 y11 y10 y9 y8 y7 y6 y5 y4 y3 y2 y1  
 V K A L E Q F M E R  
 y9 y8 y7 y6 y5 y4 y3 y2 b9

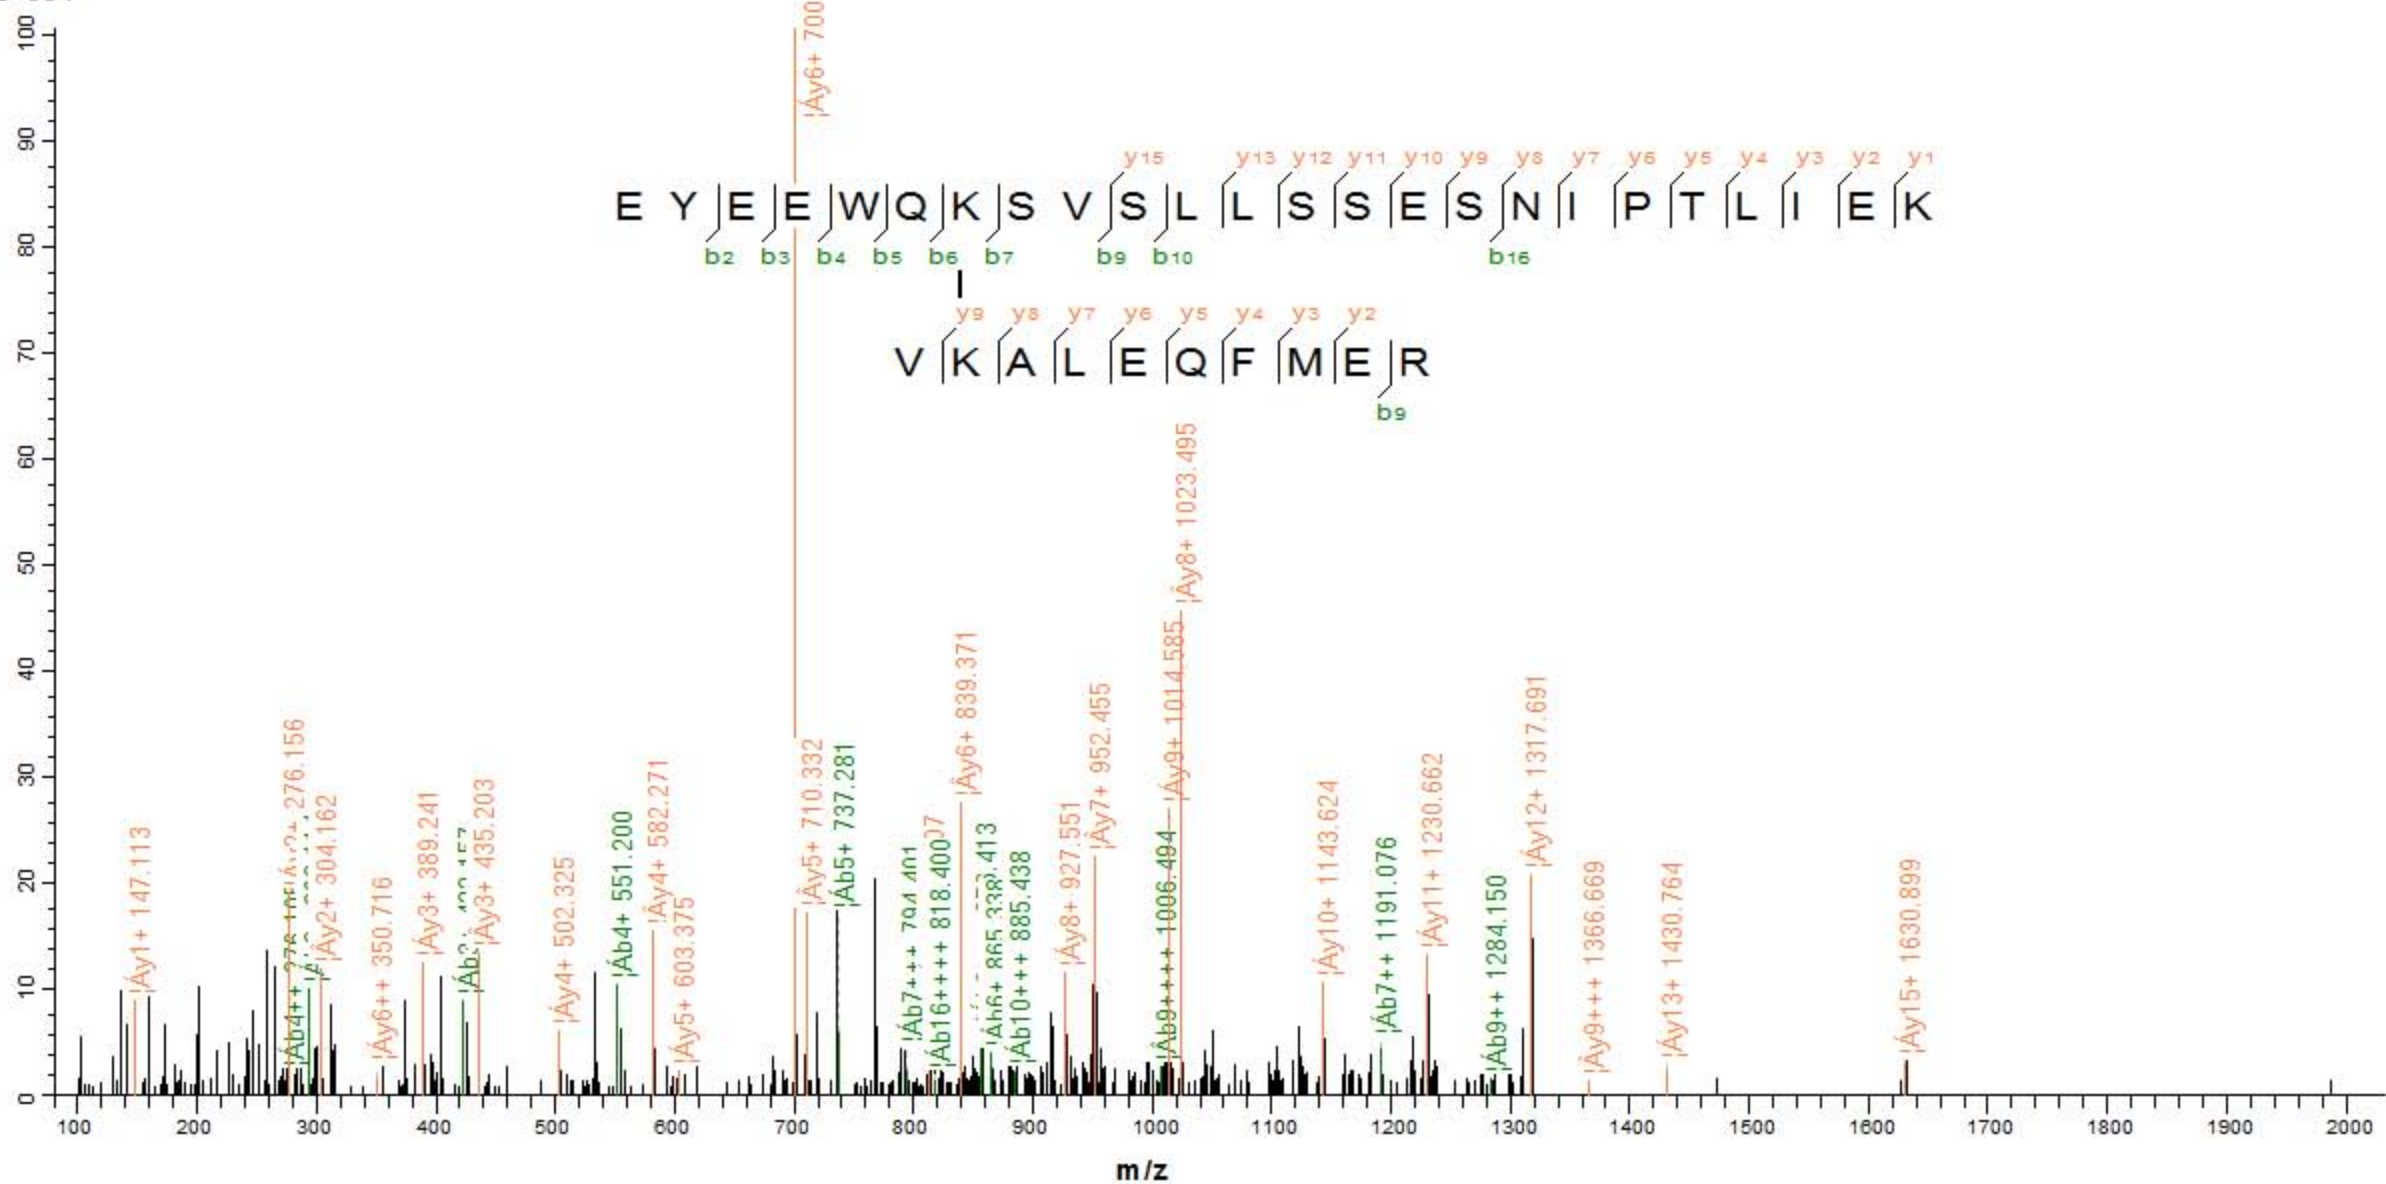

m/z

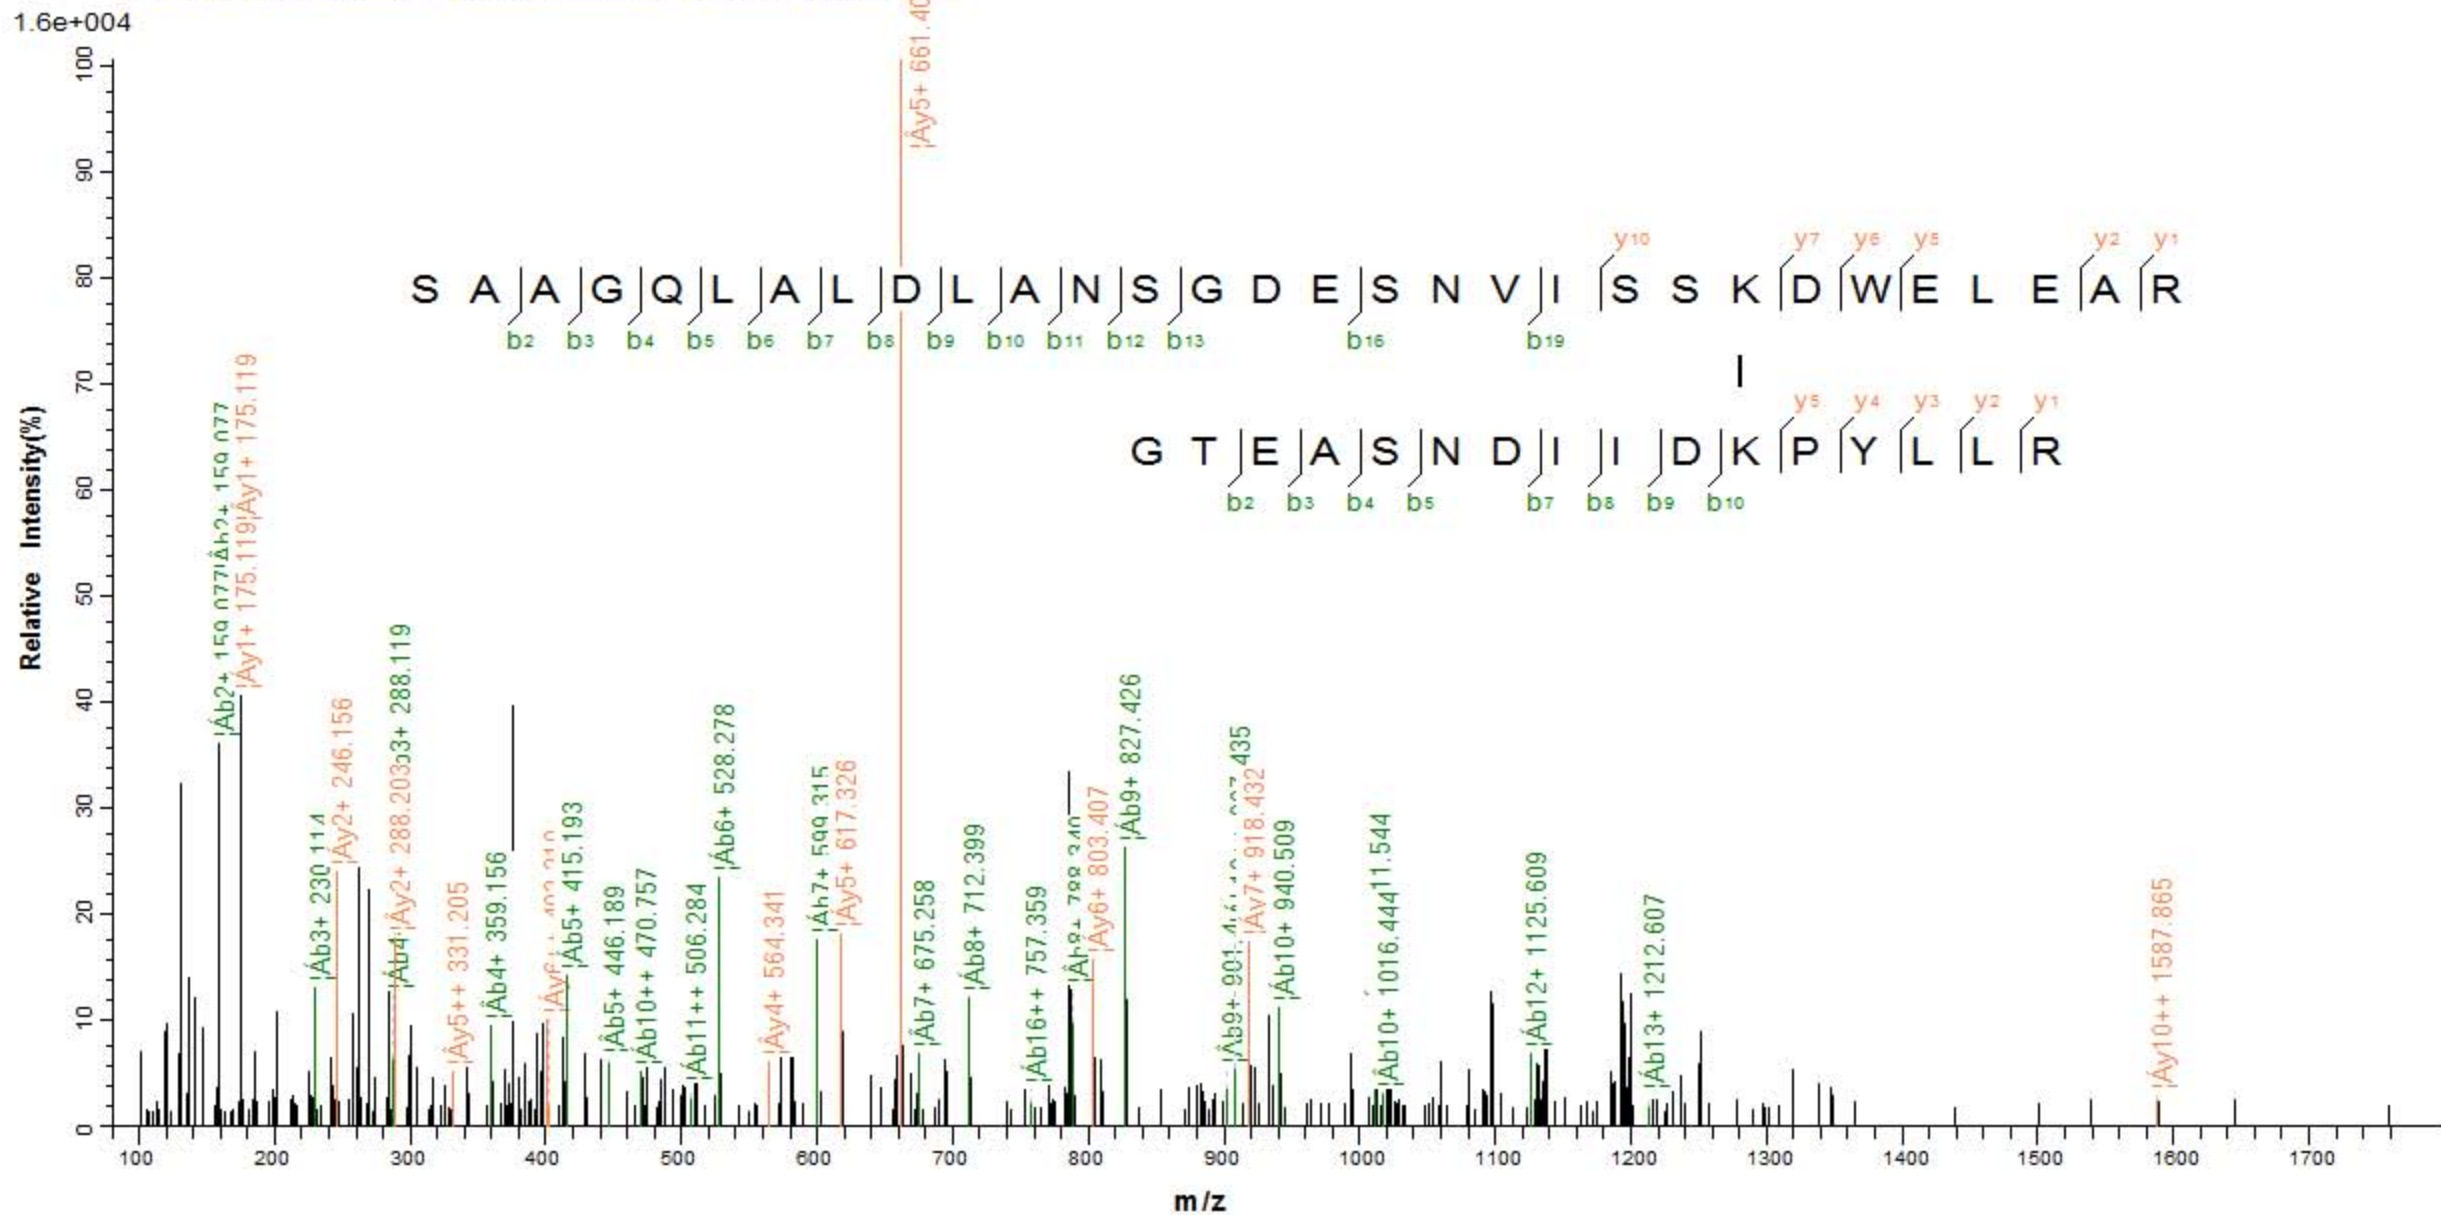

2.1e+004

Relative Intensity(%)

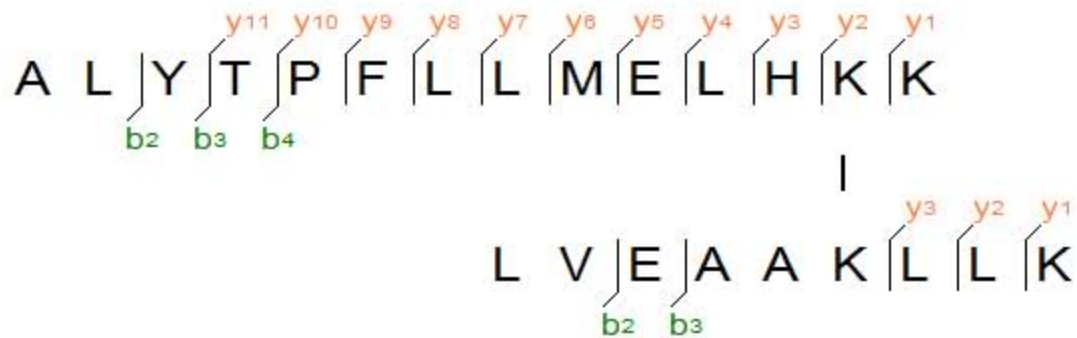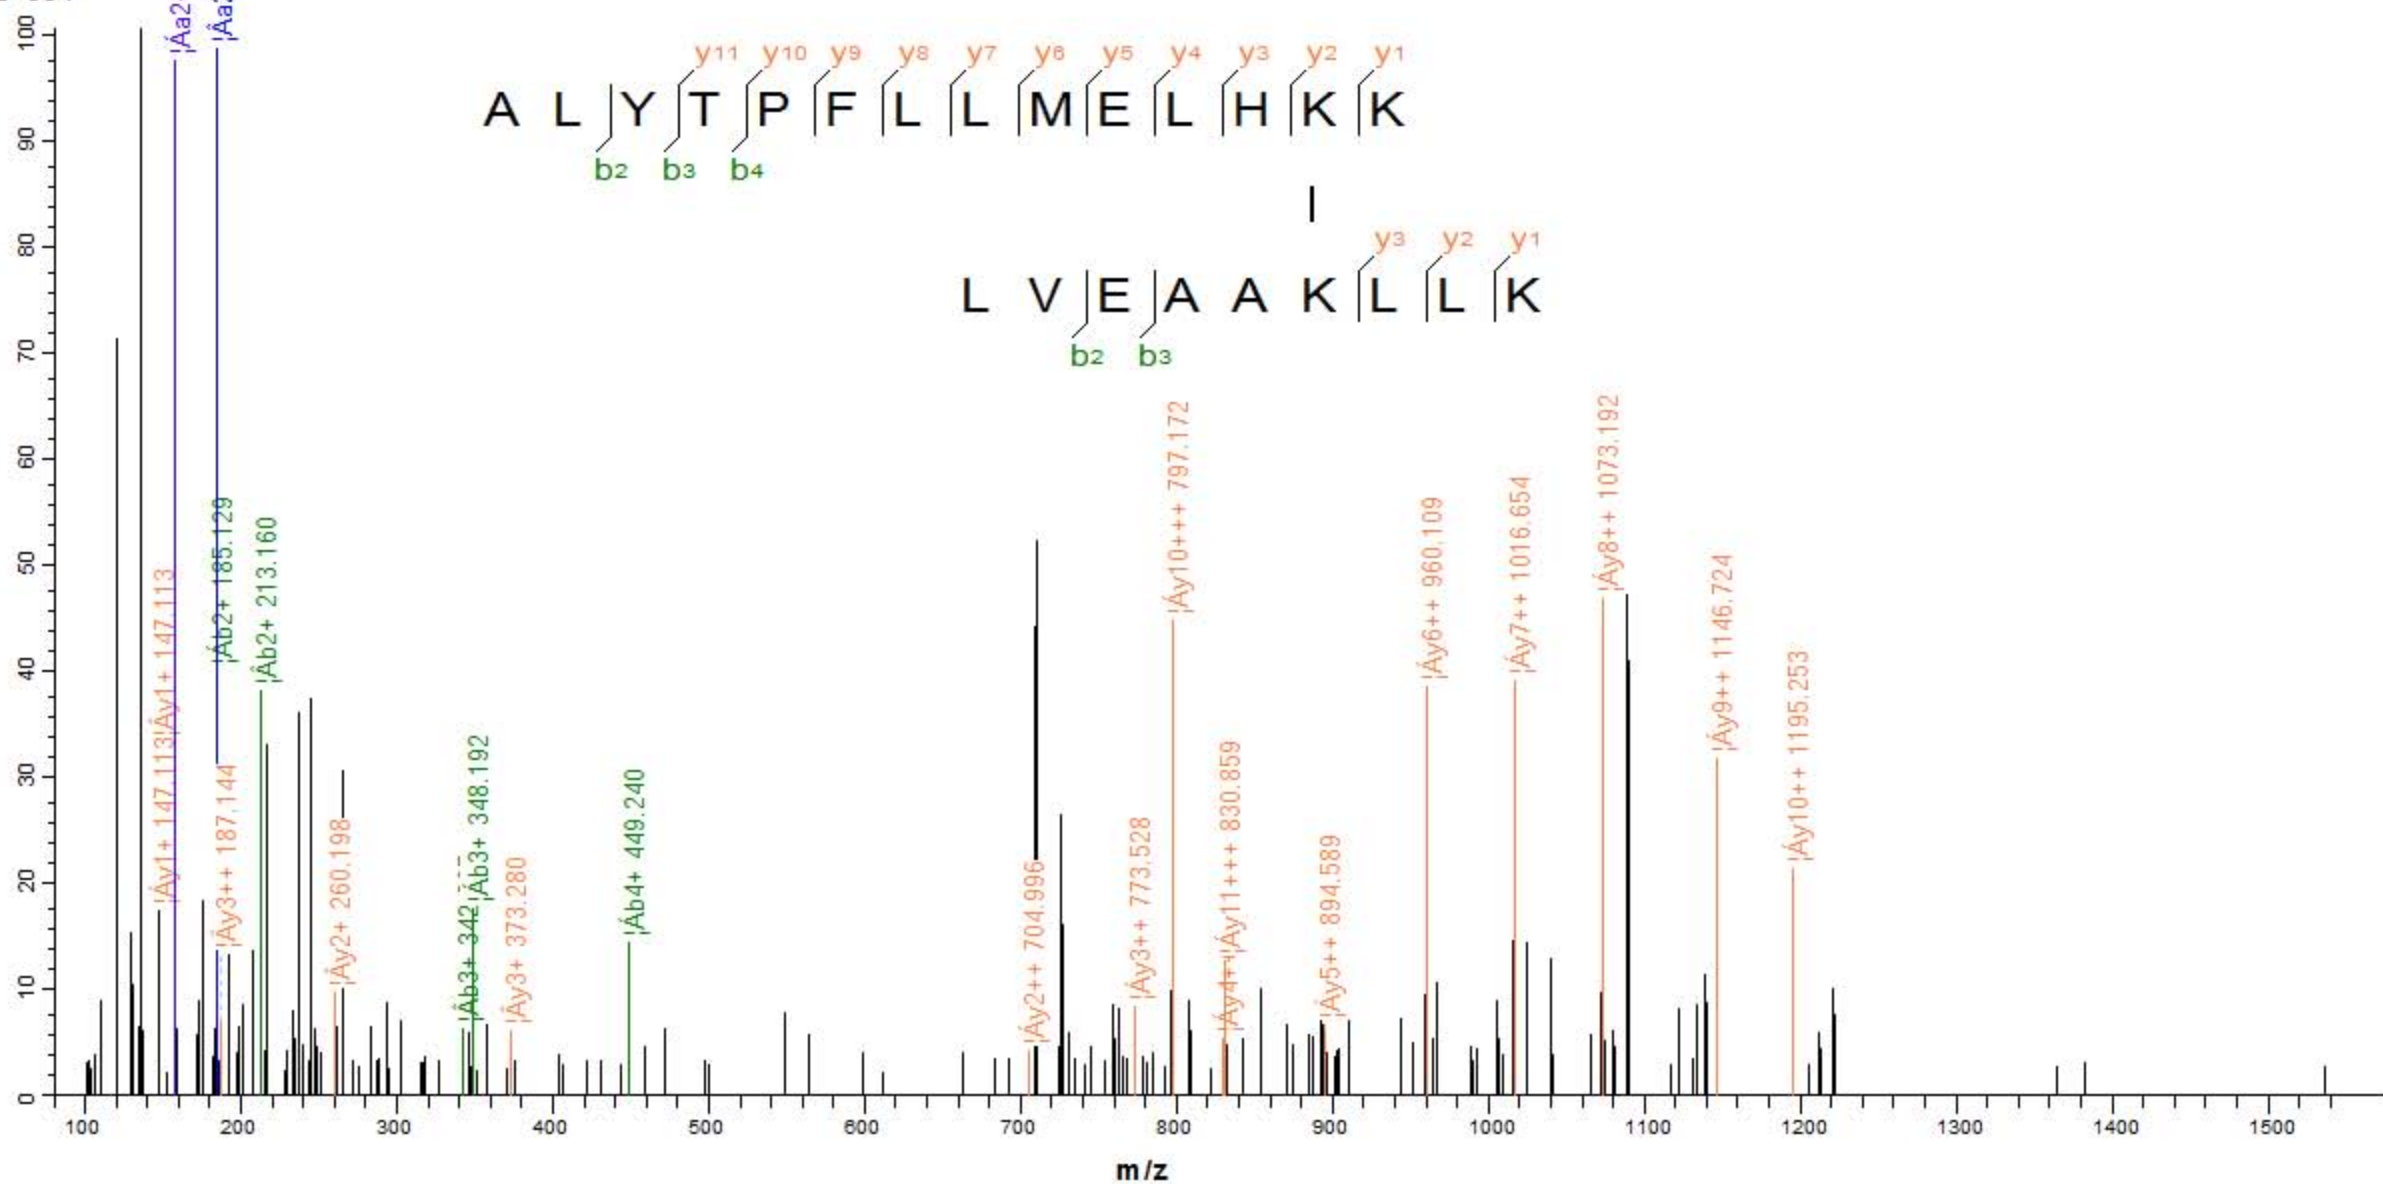

2.4e+004

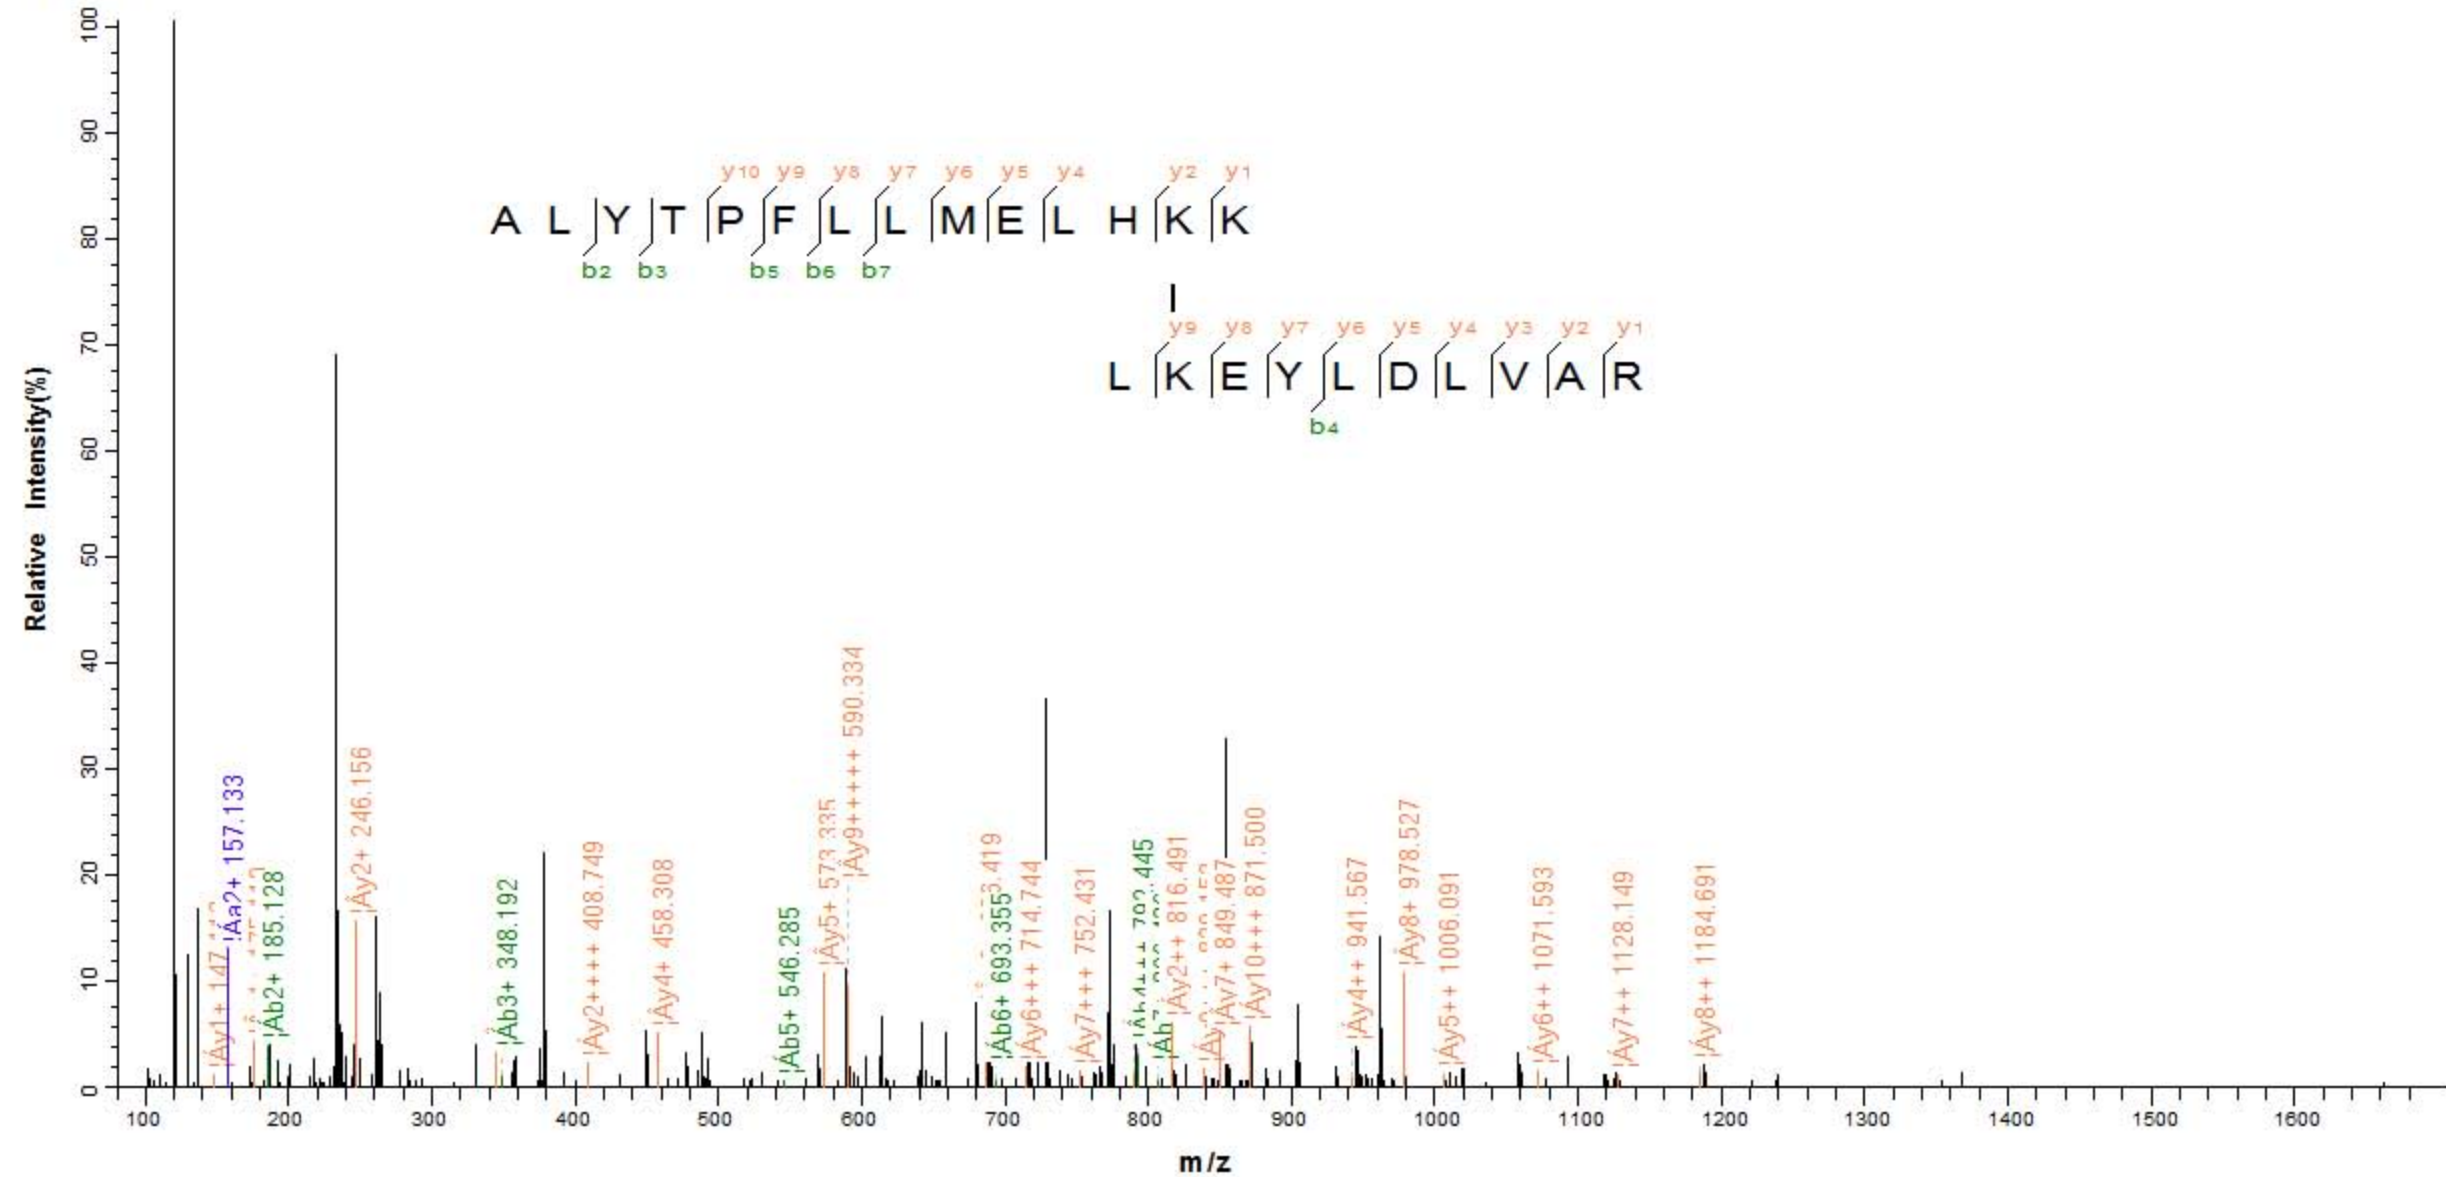

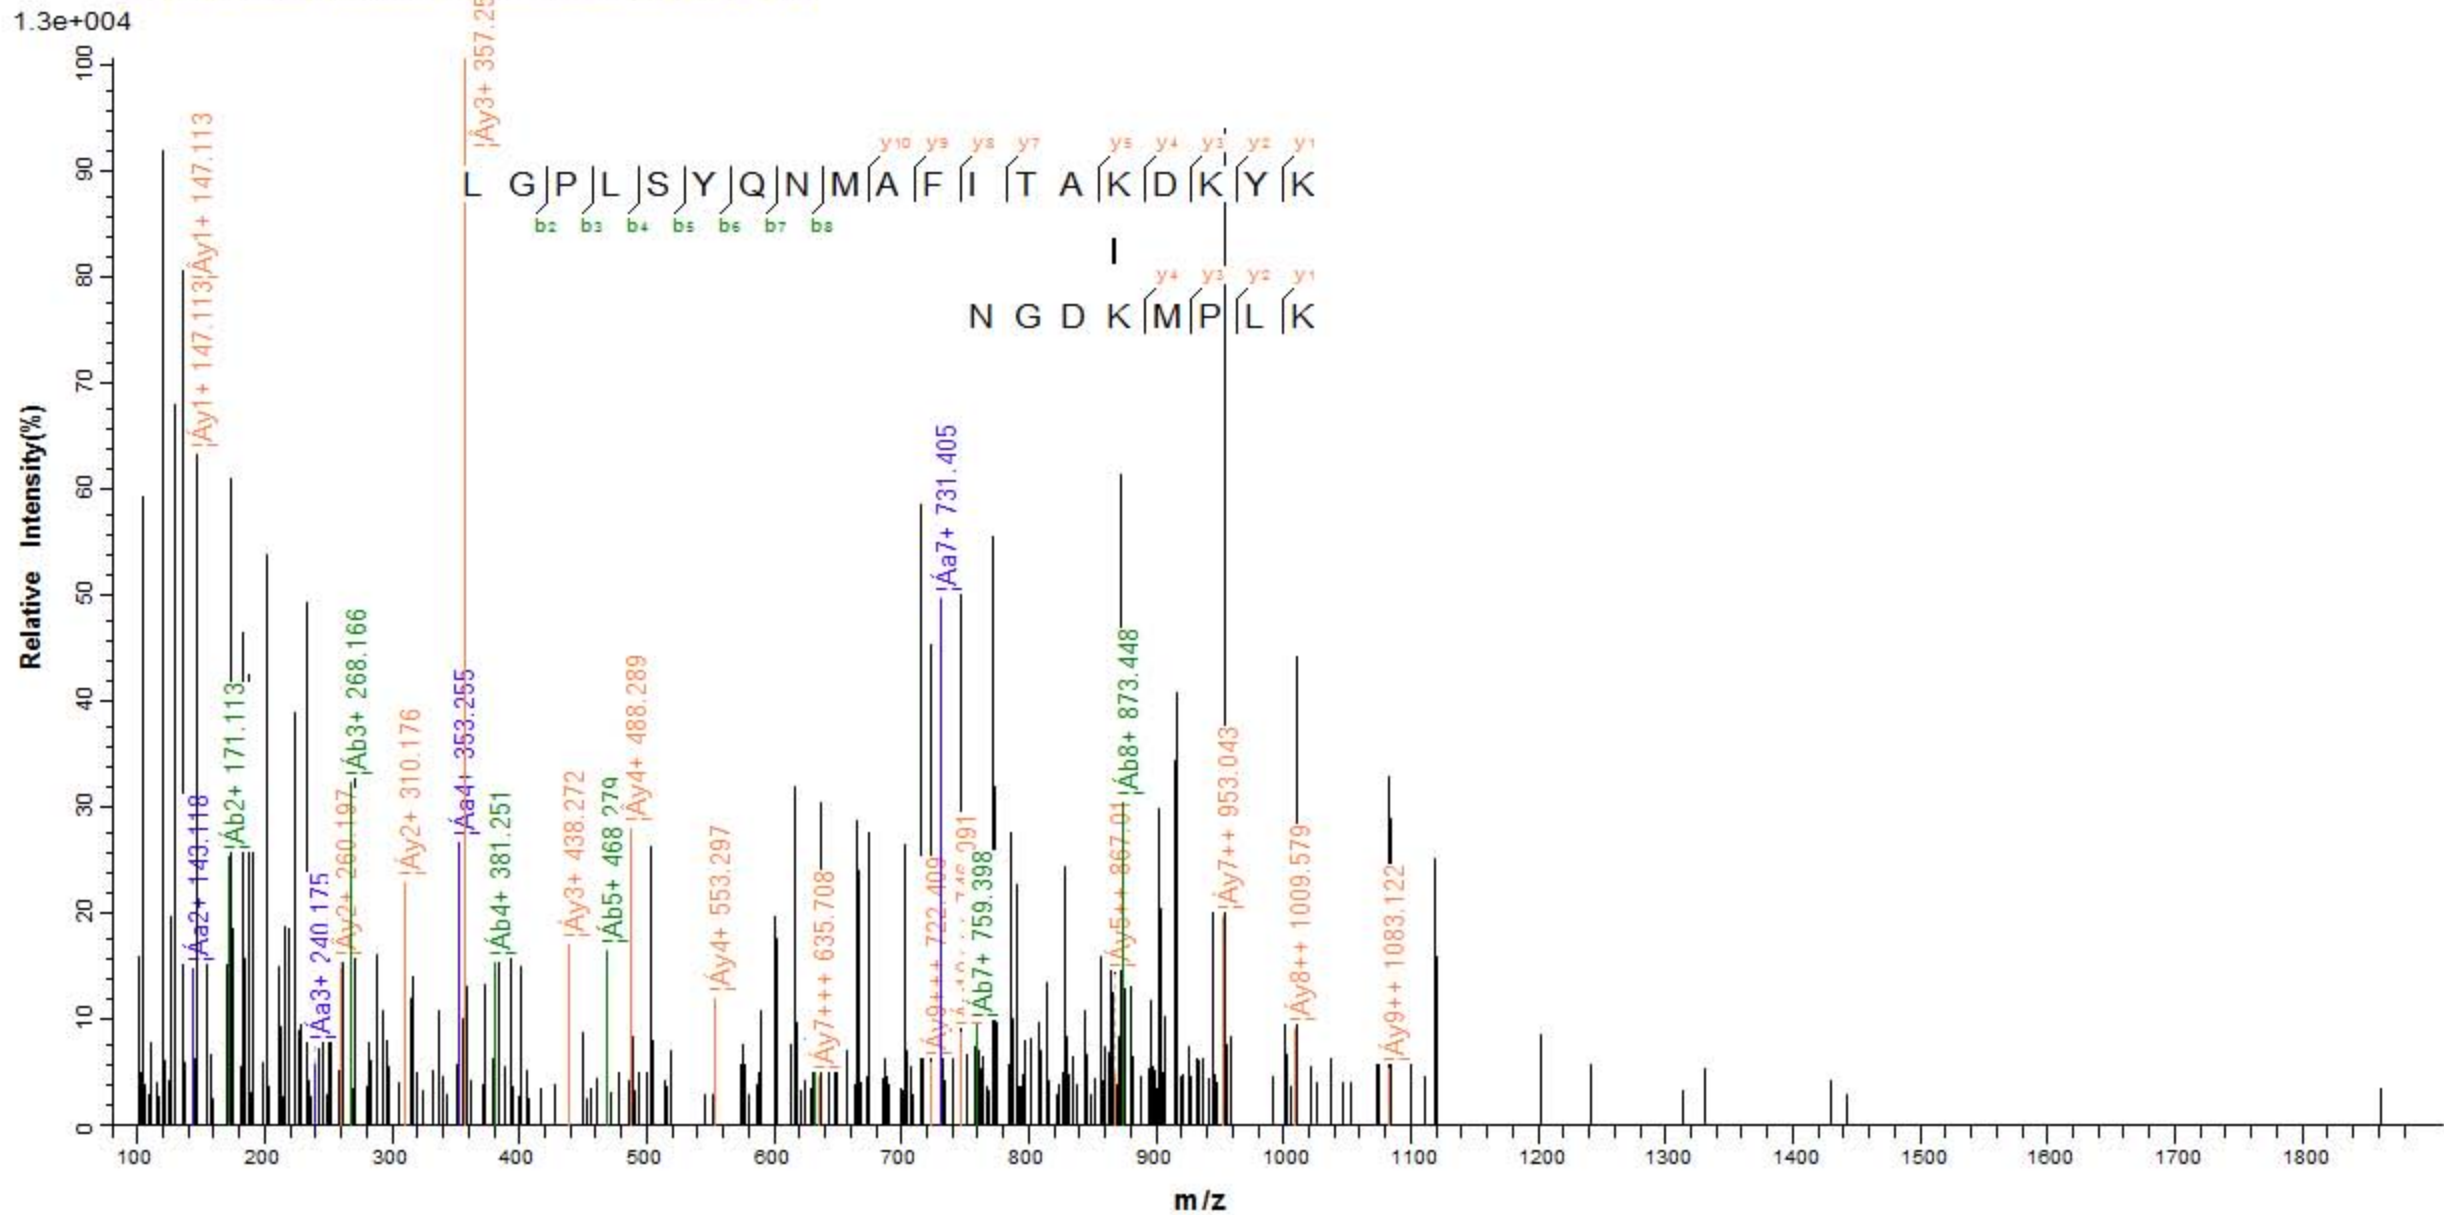

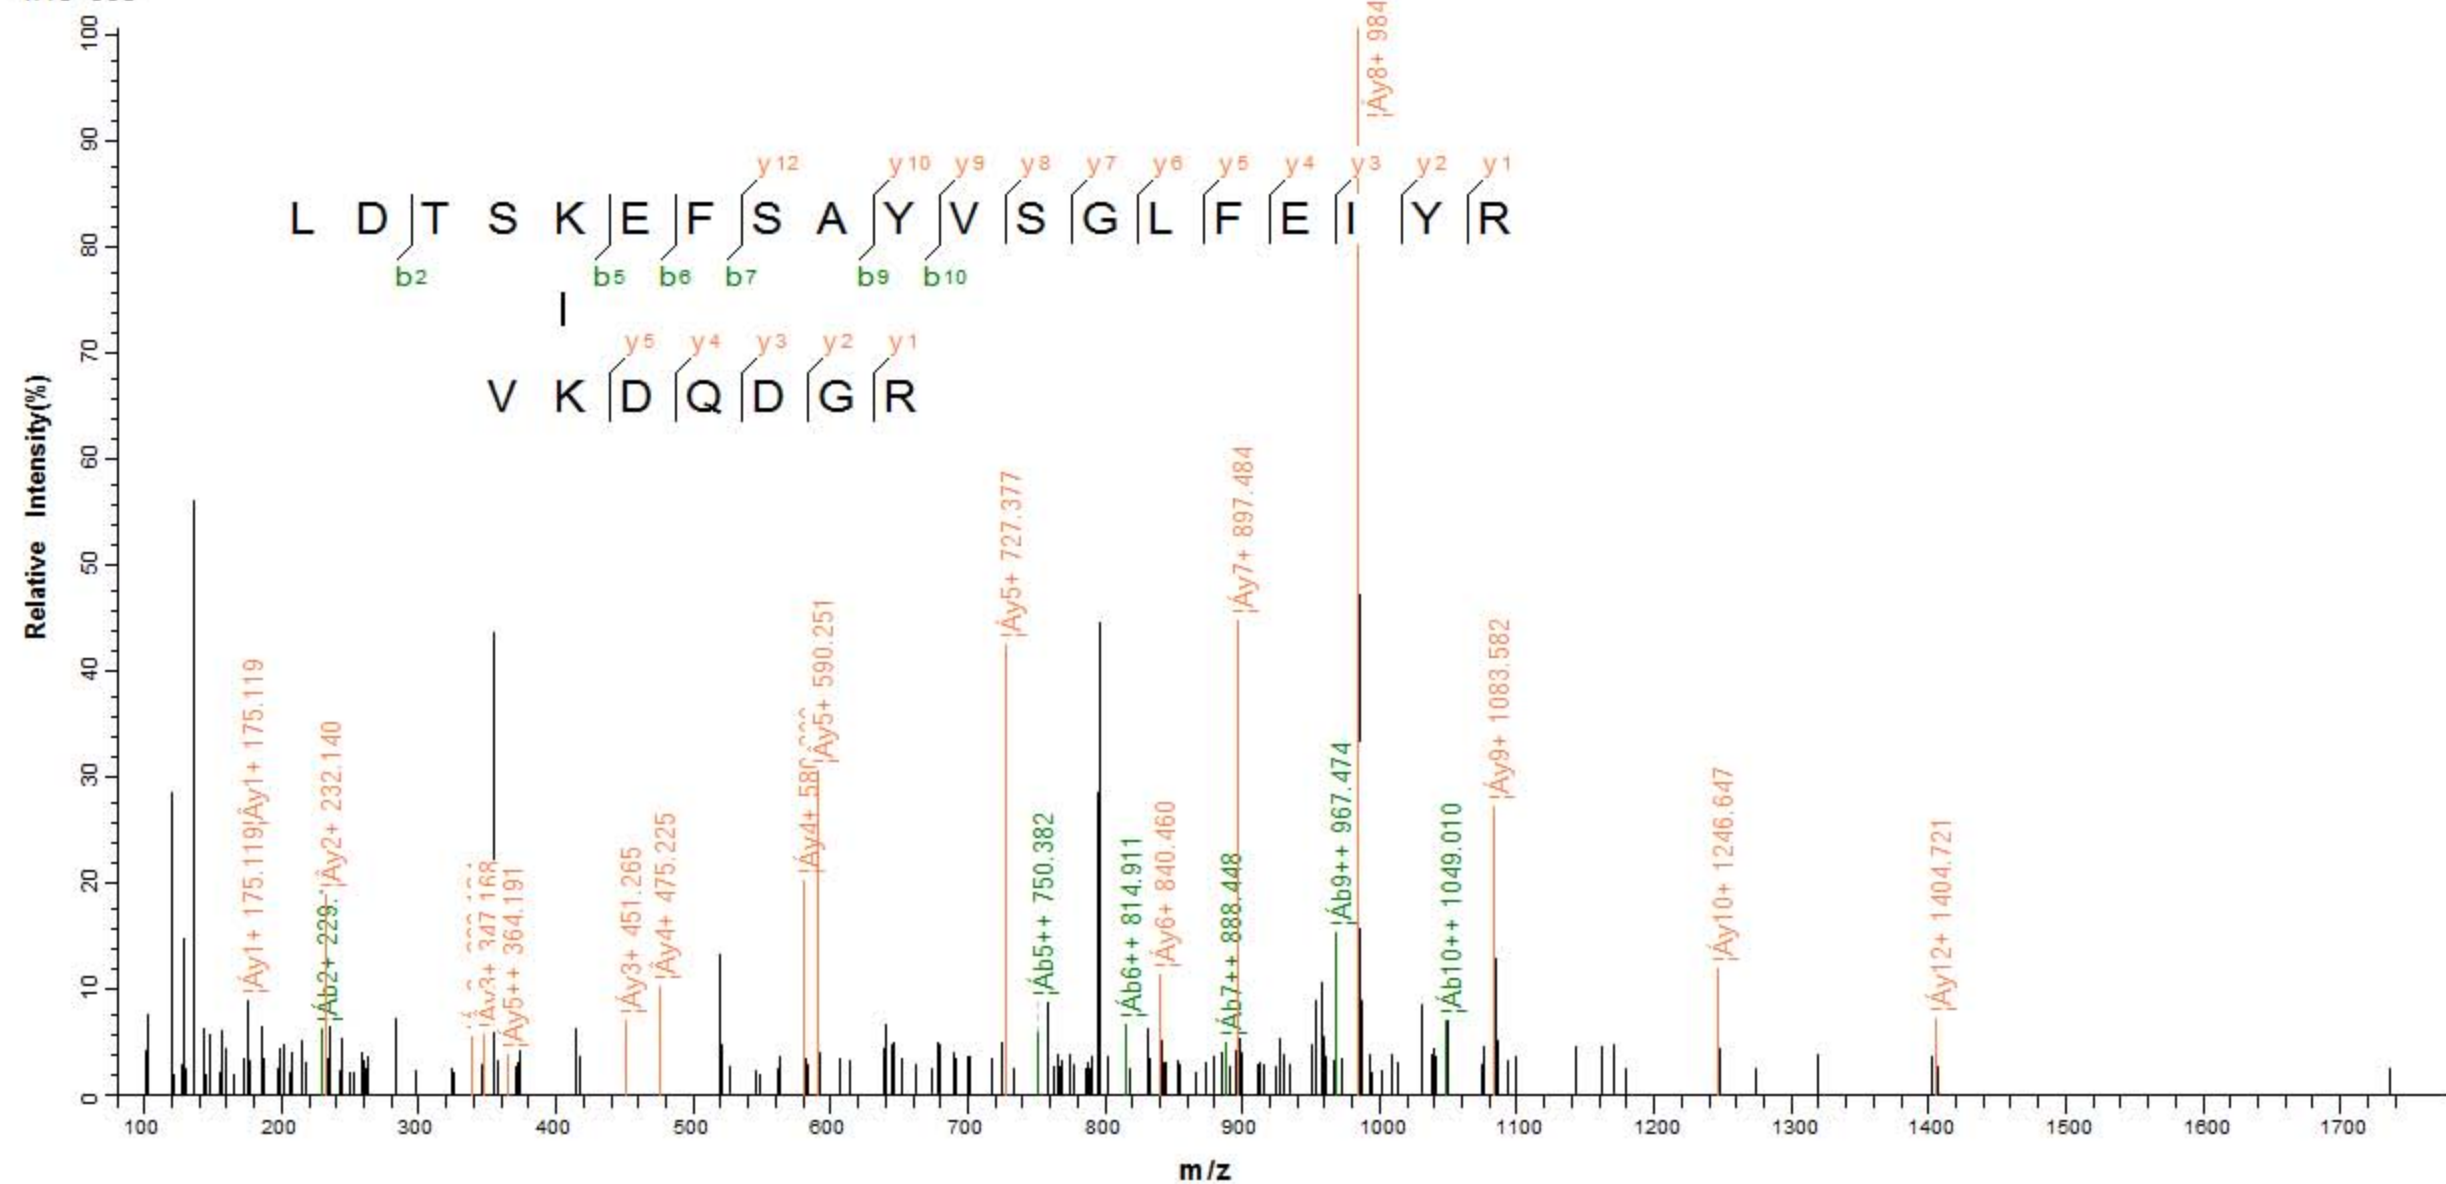

3.0e+004

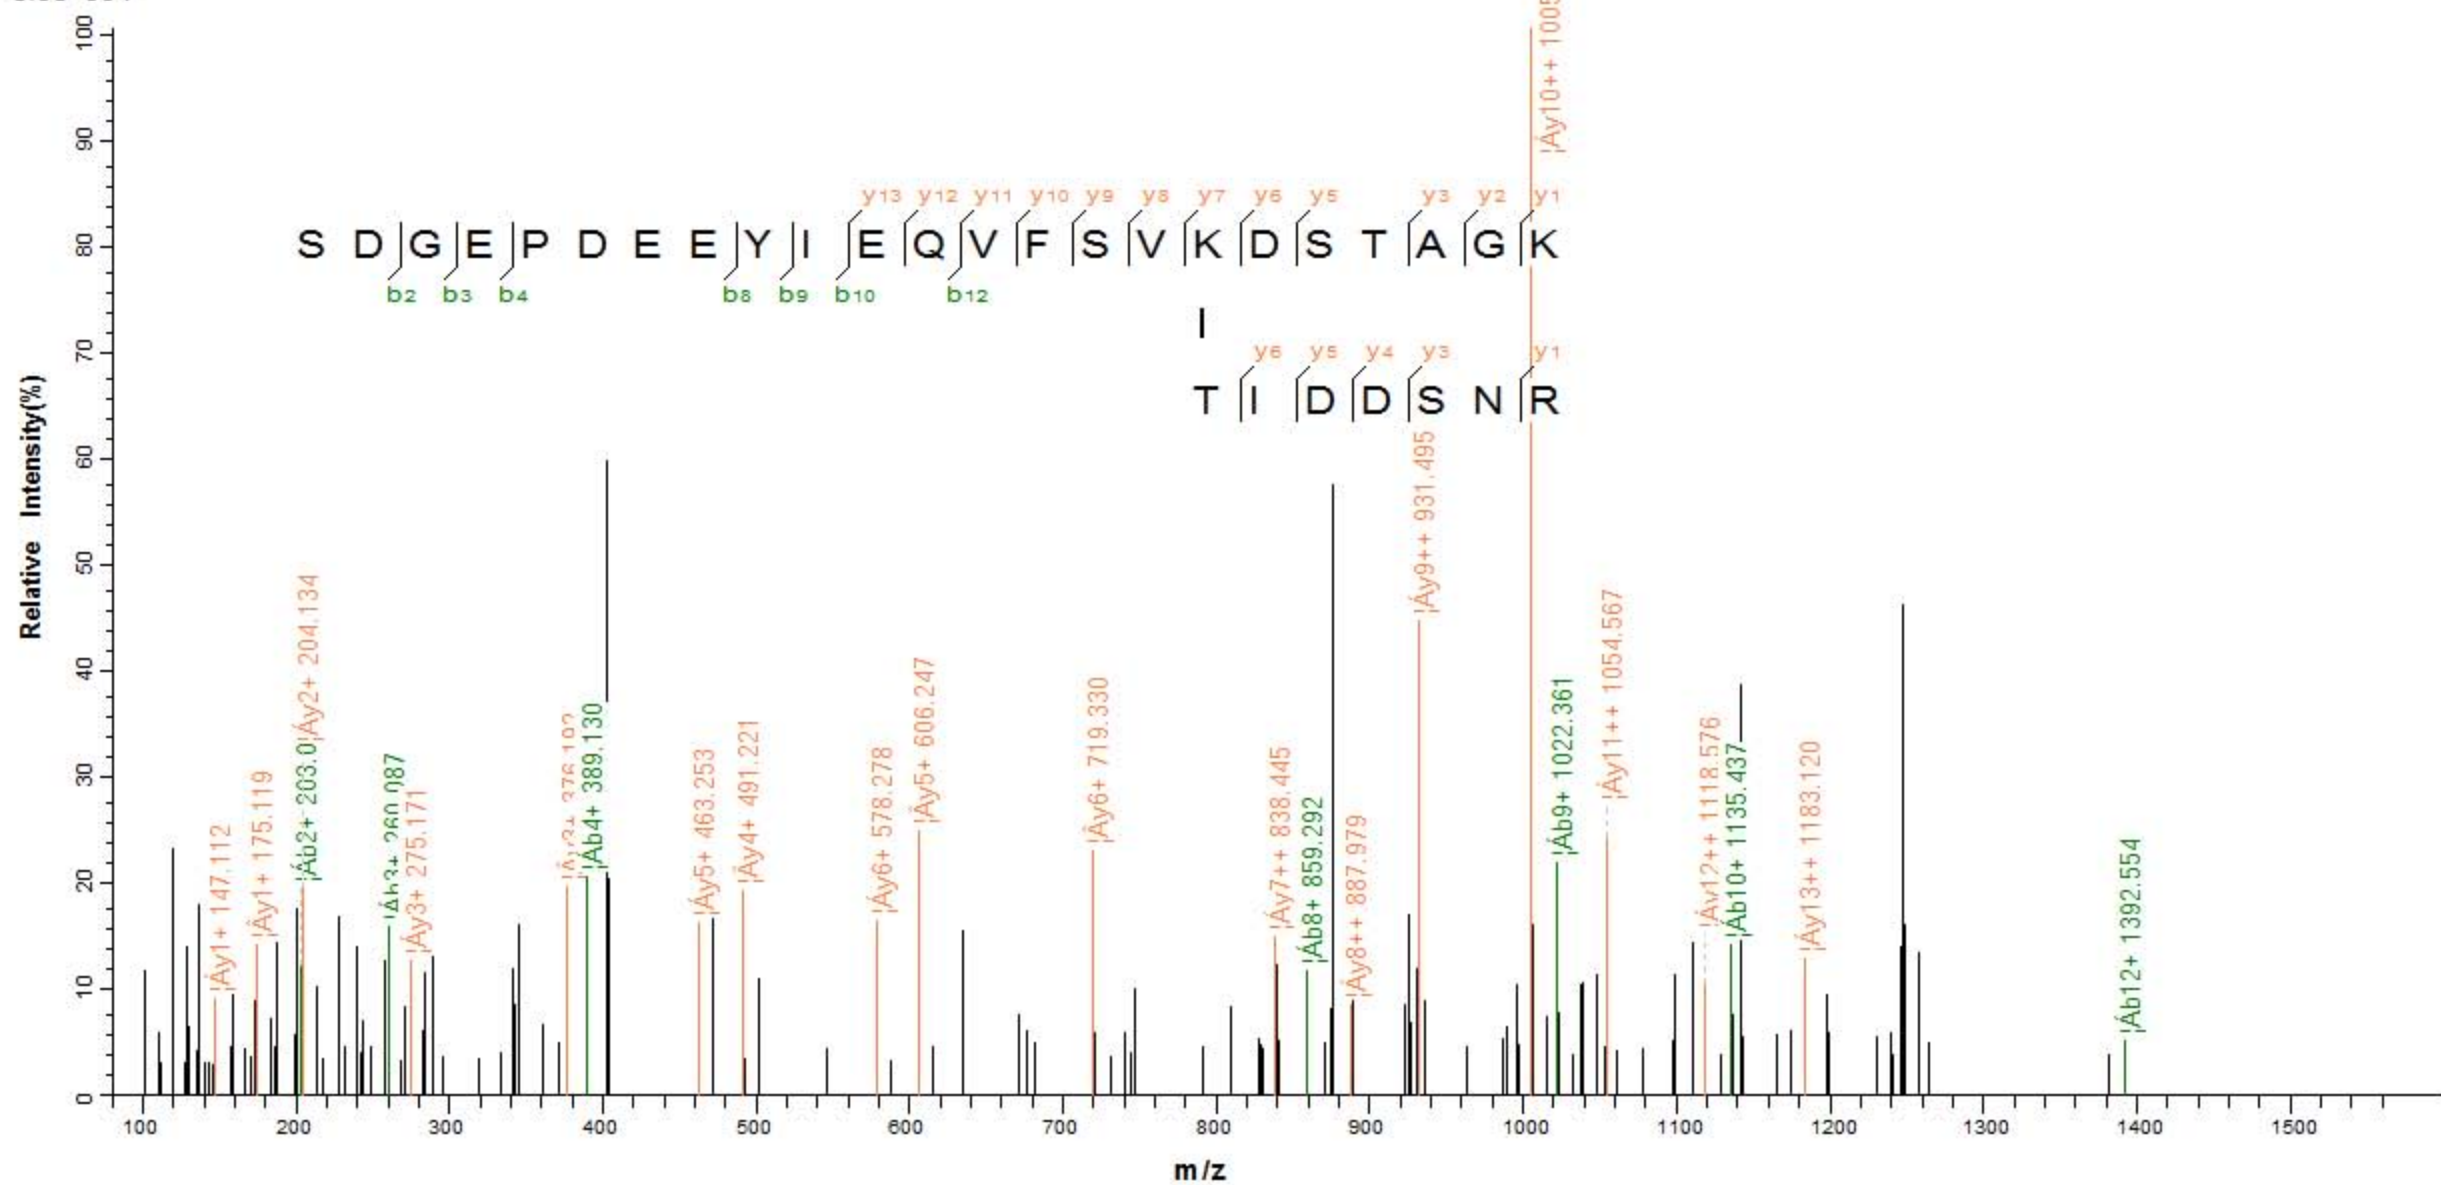

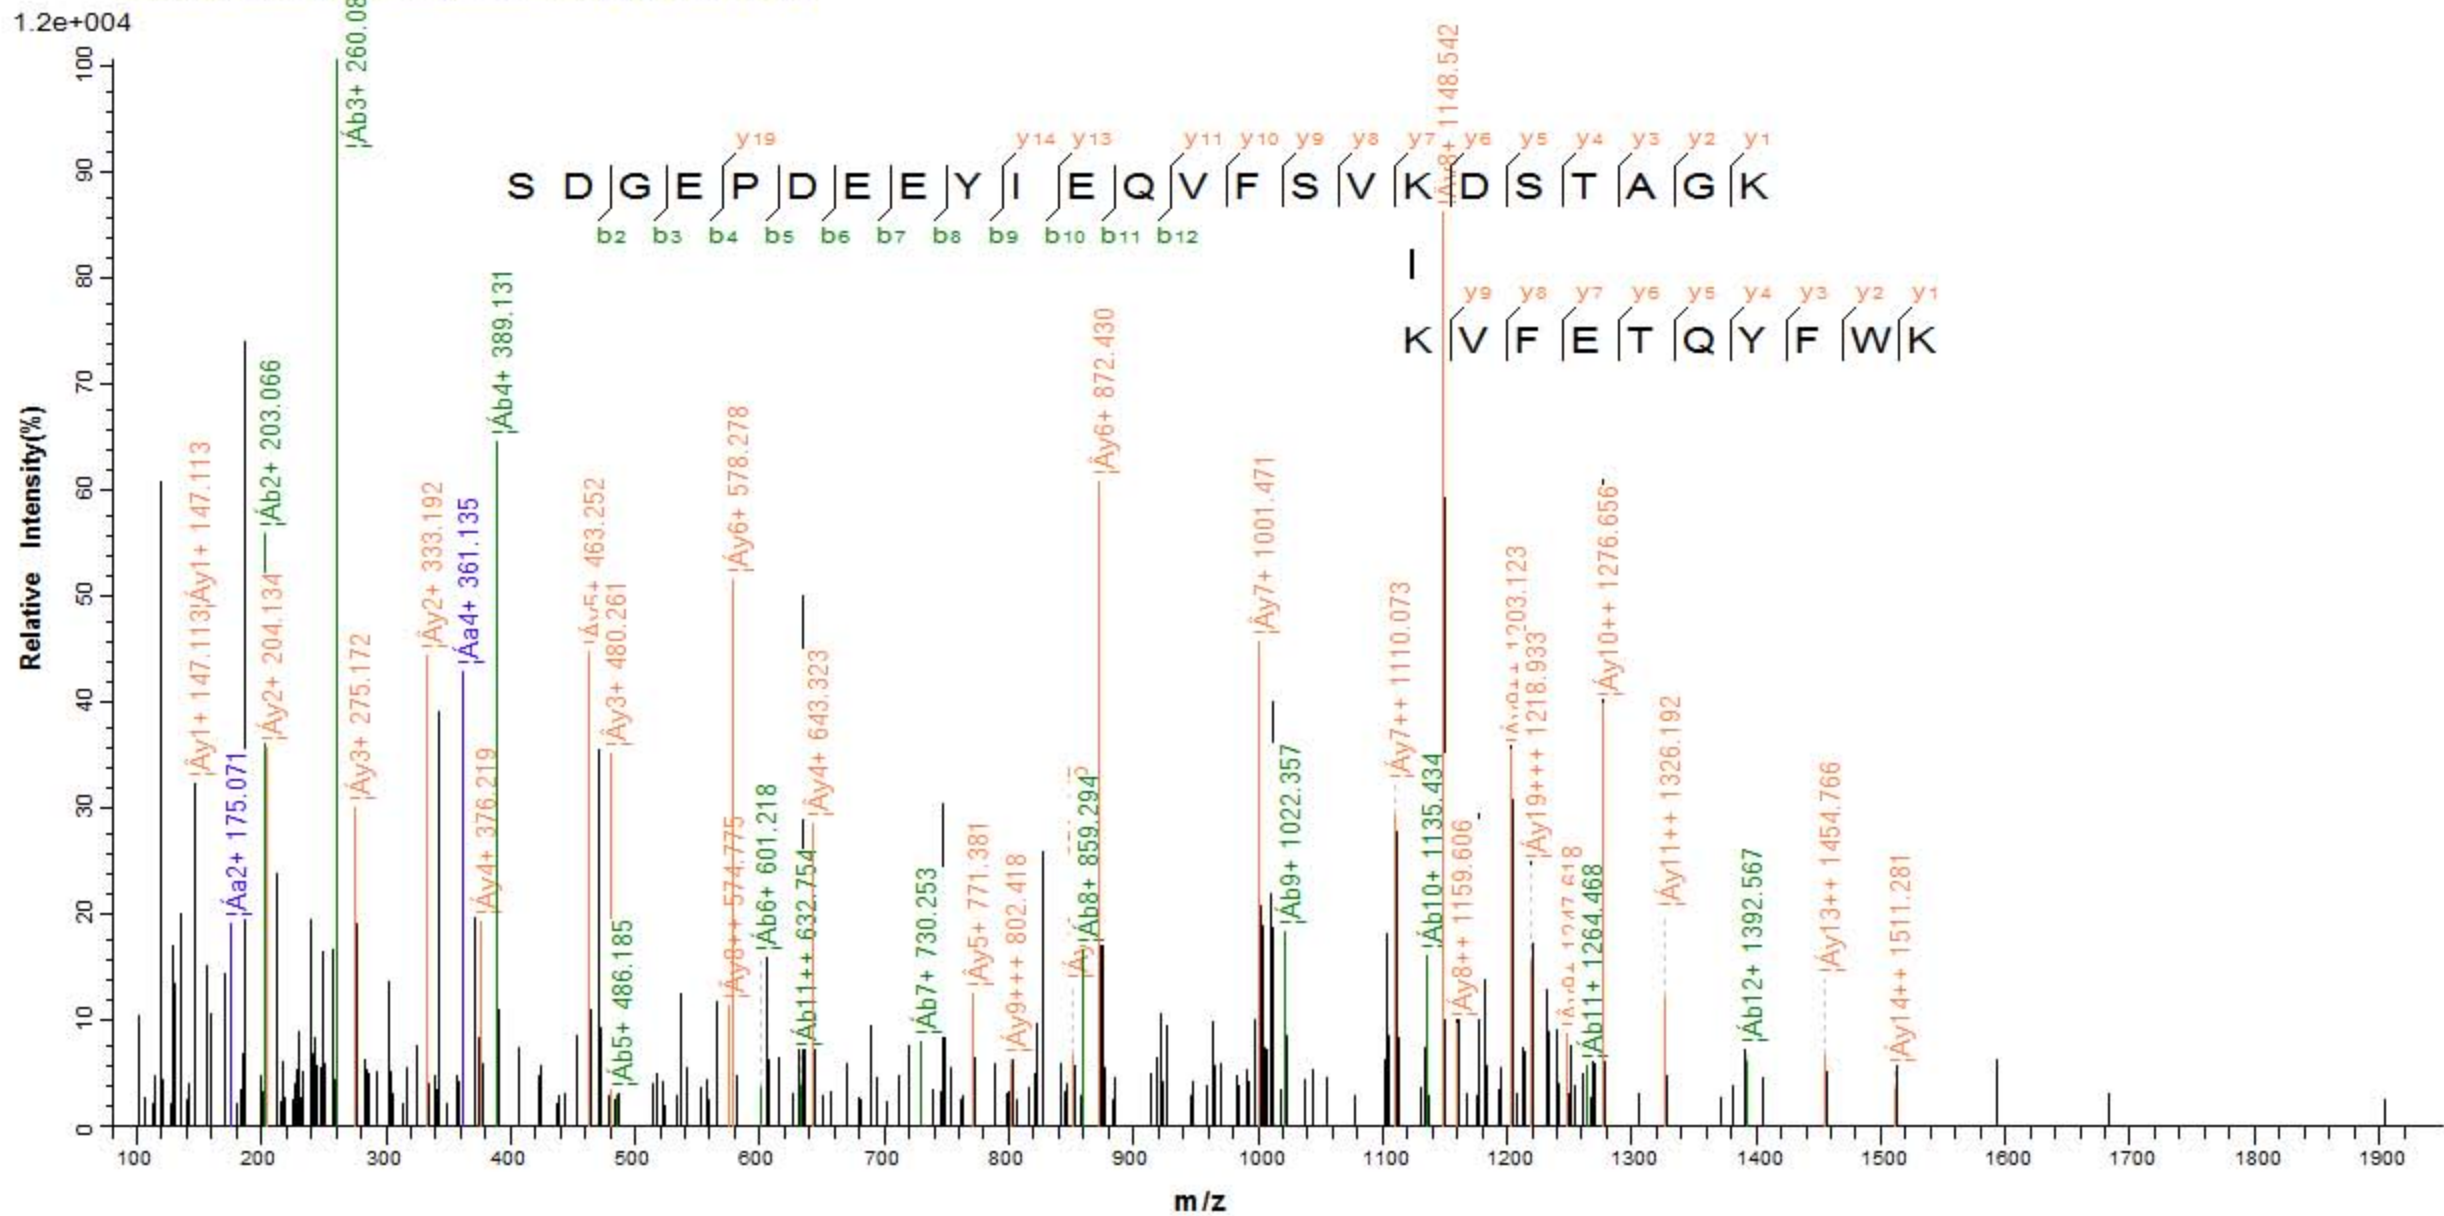



1.2e+004

Relative Intensity(%)

100  
90  
80  
70  
60  
50  
40  
30  
20  
10  
0

V F E T Q Y F W K L L N Q L V L R

b<sub>2</sub> b<sub>3</sub> b<sub>4</sub> b<sub>5</sub> b<sub>6</sub> b<sub>7</sub> b<sub>8</sub> b<sub>9</sub> b<sub>10</sub> b<sub>14</sub>

y<sub>12</sub> y<sub>11</sub> y<sub>10</sub> y<sub>9</sub> y<sub>8</sub> y<sub>7</sub> y<sub>6</sub> y<sub>5</sub> y<sub>4</sub> y<sub>3</sub> y<sub>2</sub> y<sub>1</sub>

D S T A G K K

b<sub>2</sub> b<sub>3</sub> b<sub>4</sub> y<sub>1</sub>

m/z

100 200 300 400 500 600 700 800 900 1000 1100 1200 1300 1400

|Ay6+ 742.455

|Ay7+ 855.538

|Ay9++ 970.582

|Ay8+ 968.622

|Ab9++ 1037.020

|Ay10++ 1063.613

|Ab8+ 1101.497

|Ay11++ 1137.162

|Ay12++ 1218.669

|Ay1+ 147.112

|Ay1+ 175.118

|Ab2+ 203.065

|Ab2+ 247.143

|Ay2+ 288.202

|Ab3+ 304.114

|Ab4+ 376.100

|Ay3+ 387.270

|Ay7++ 428.273

|Ab7++ 458.208

|Ay5+ 628.411

|Ay8++ 484.813

|Ay4+ 500.354

|Ab5+ 605.290

|Ay9+++ 647.382

|Ay10+++ 709.413

|Ab6+ 768.353

|Ab14+++ 885.451

|Ab7+ 915.421

|Ab9++ 1037.020

|Ay10++ 1063.613

|Ab8+ 1101.497

|Ay11++ 1137.162

|Ay12++ 1218.669

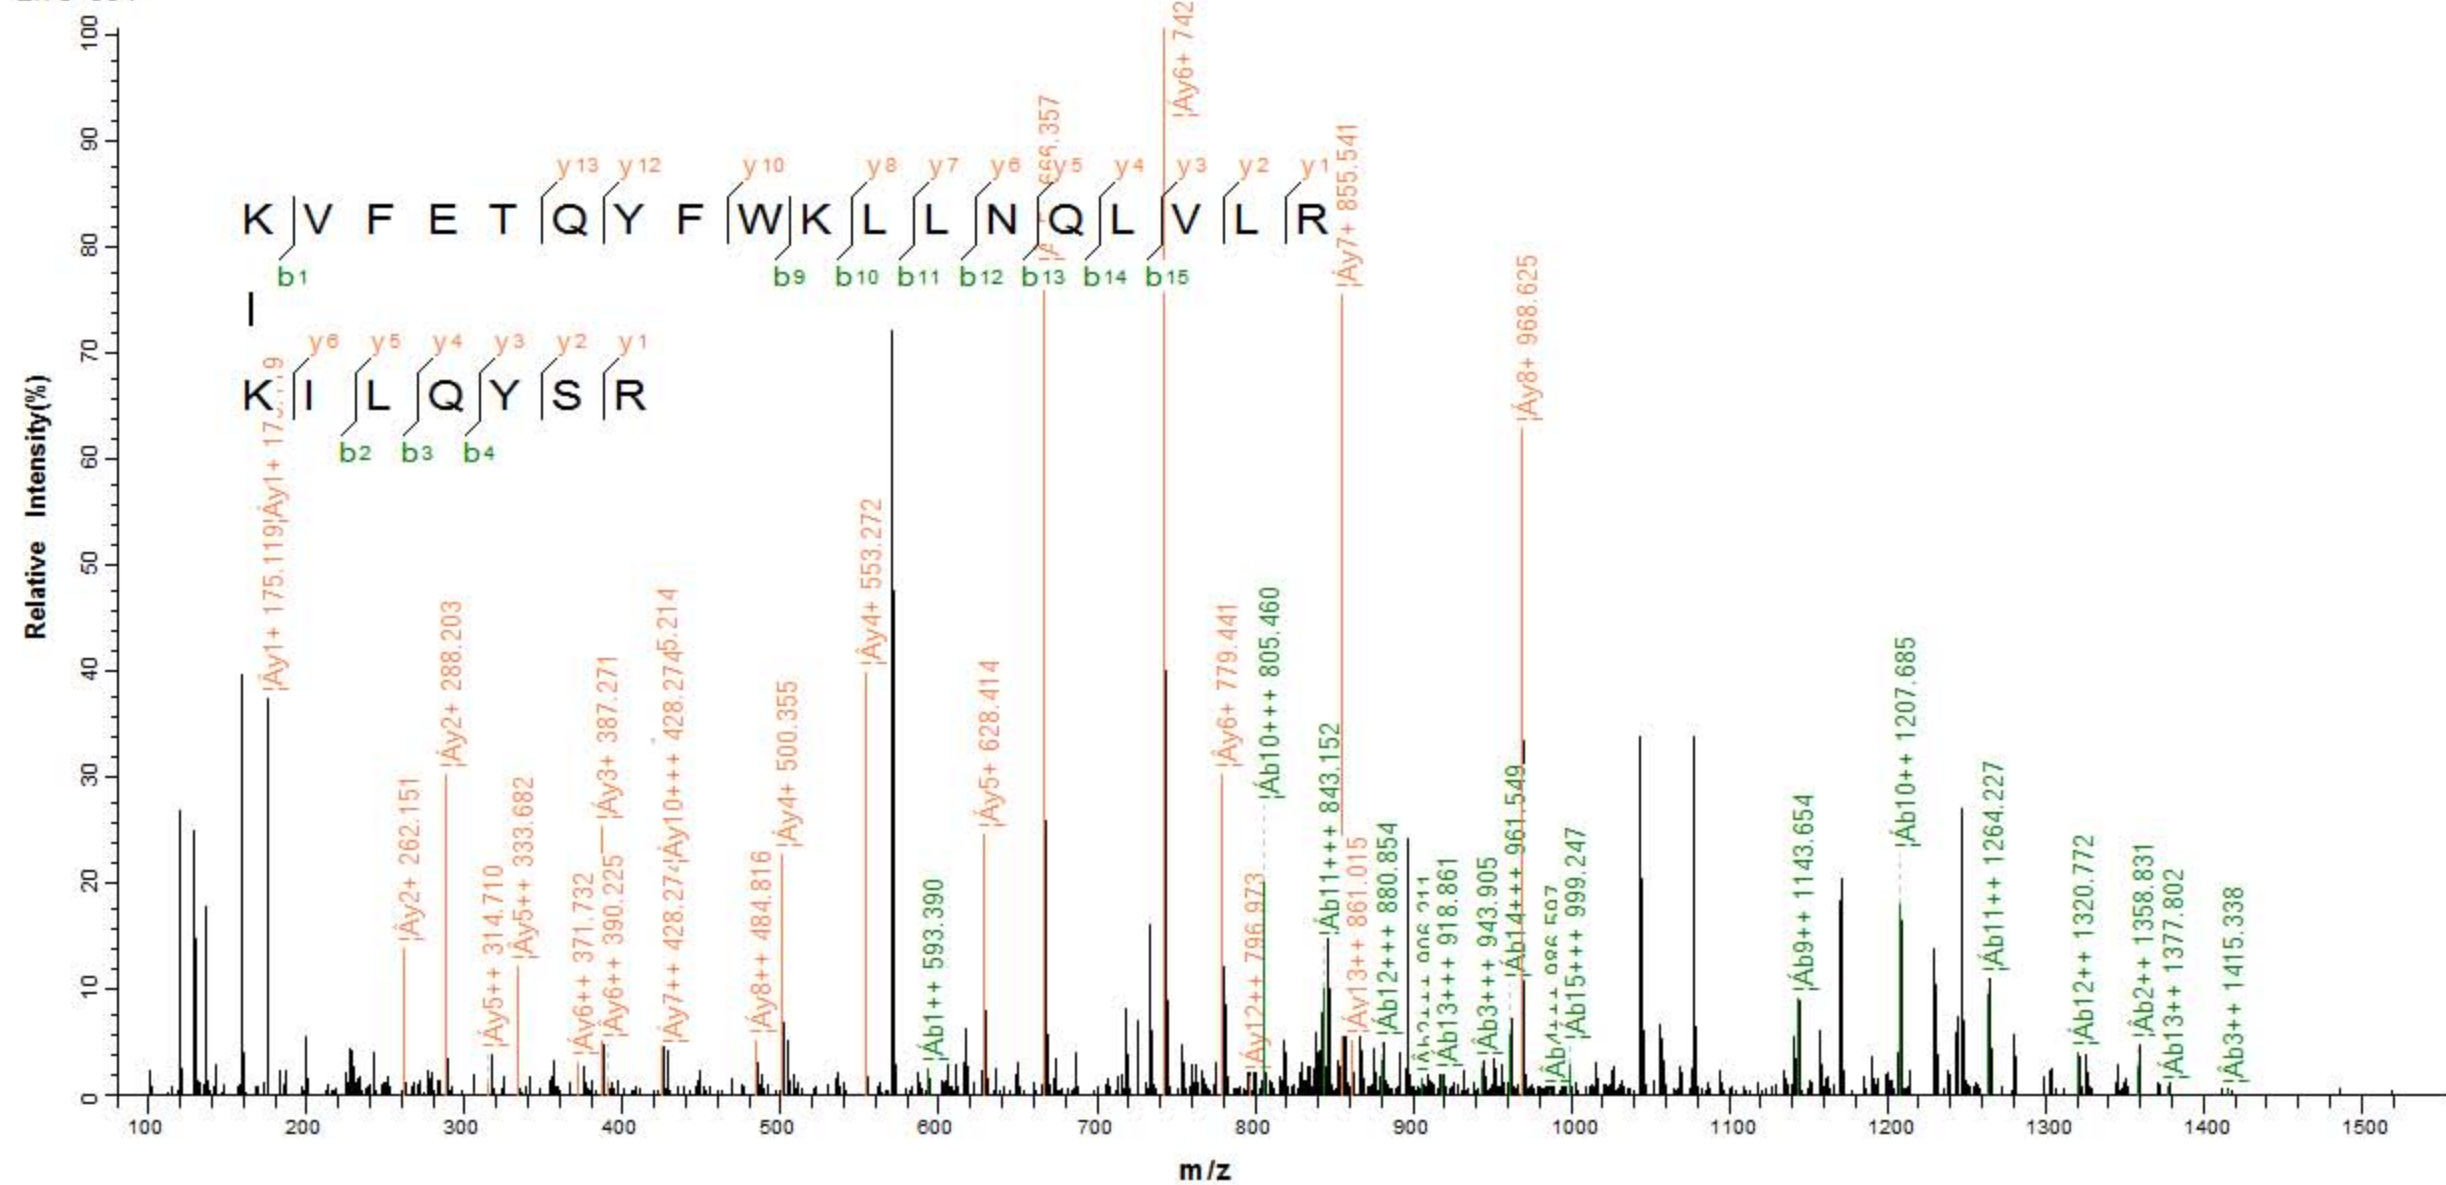

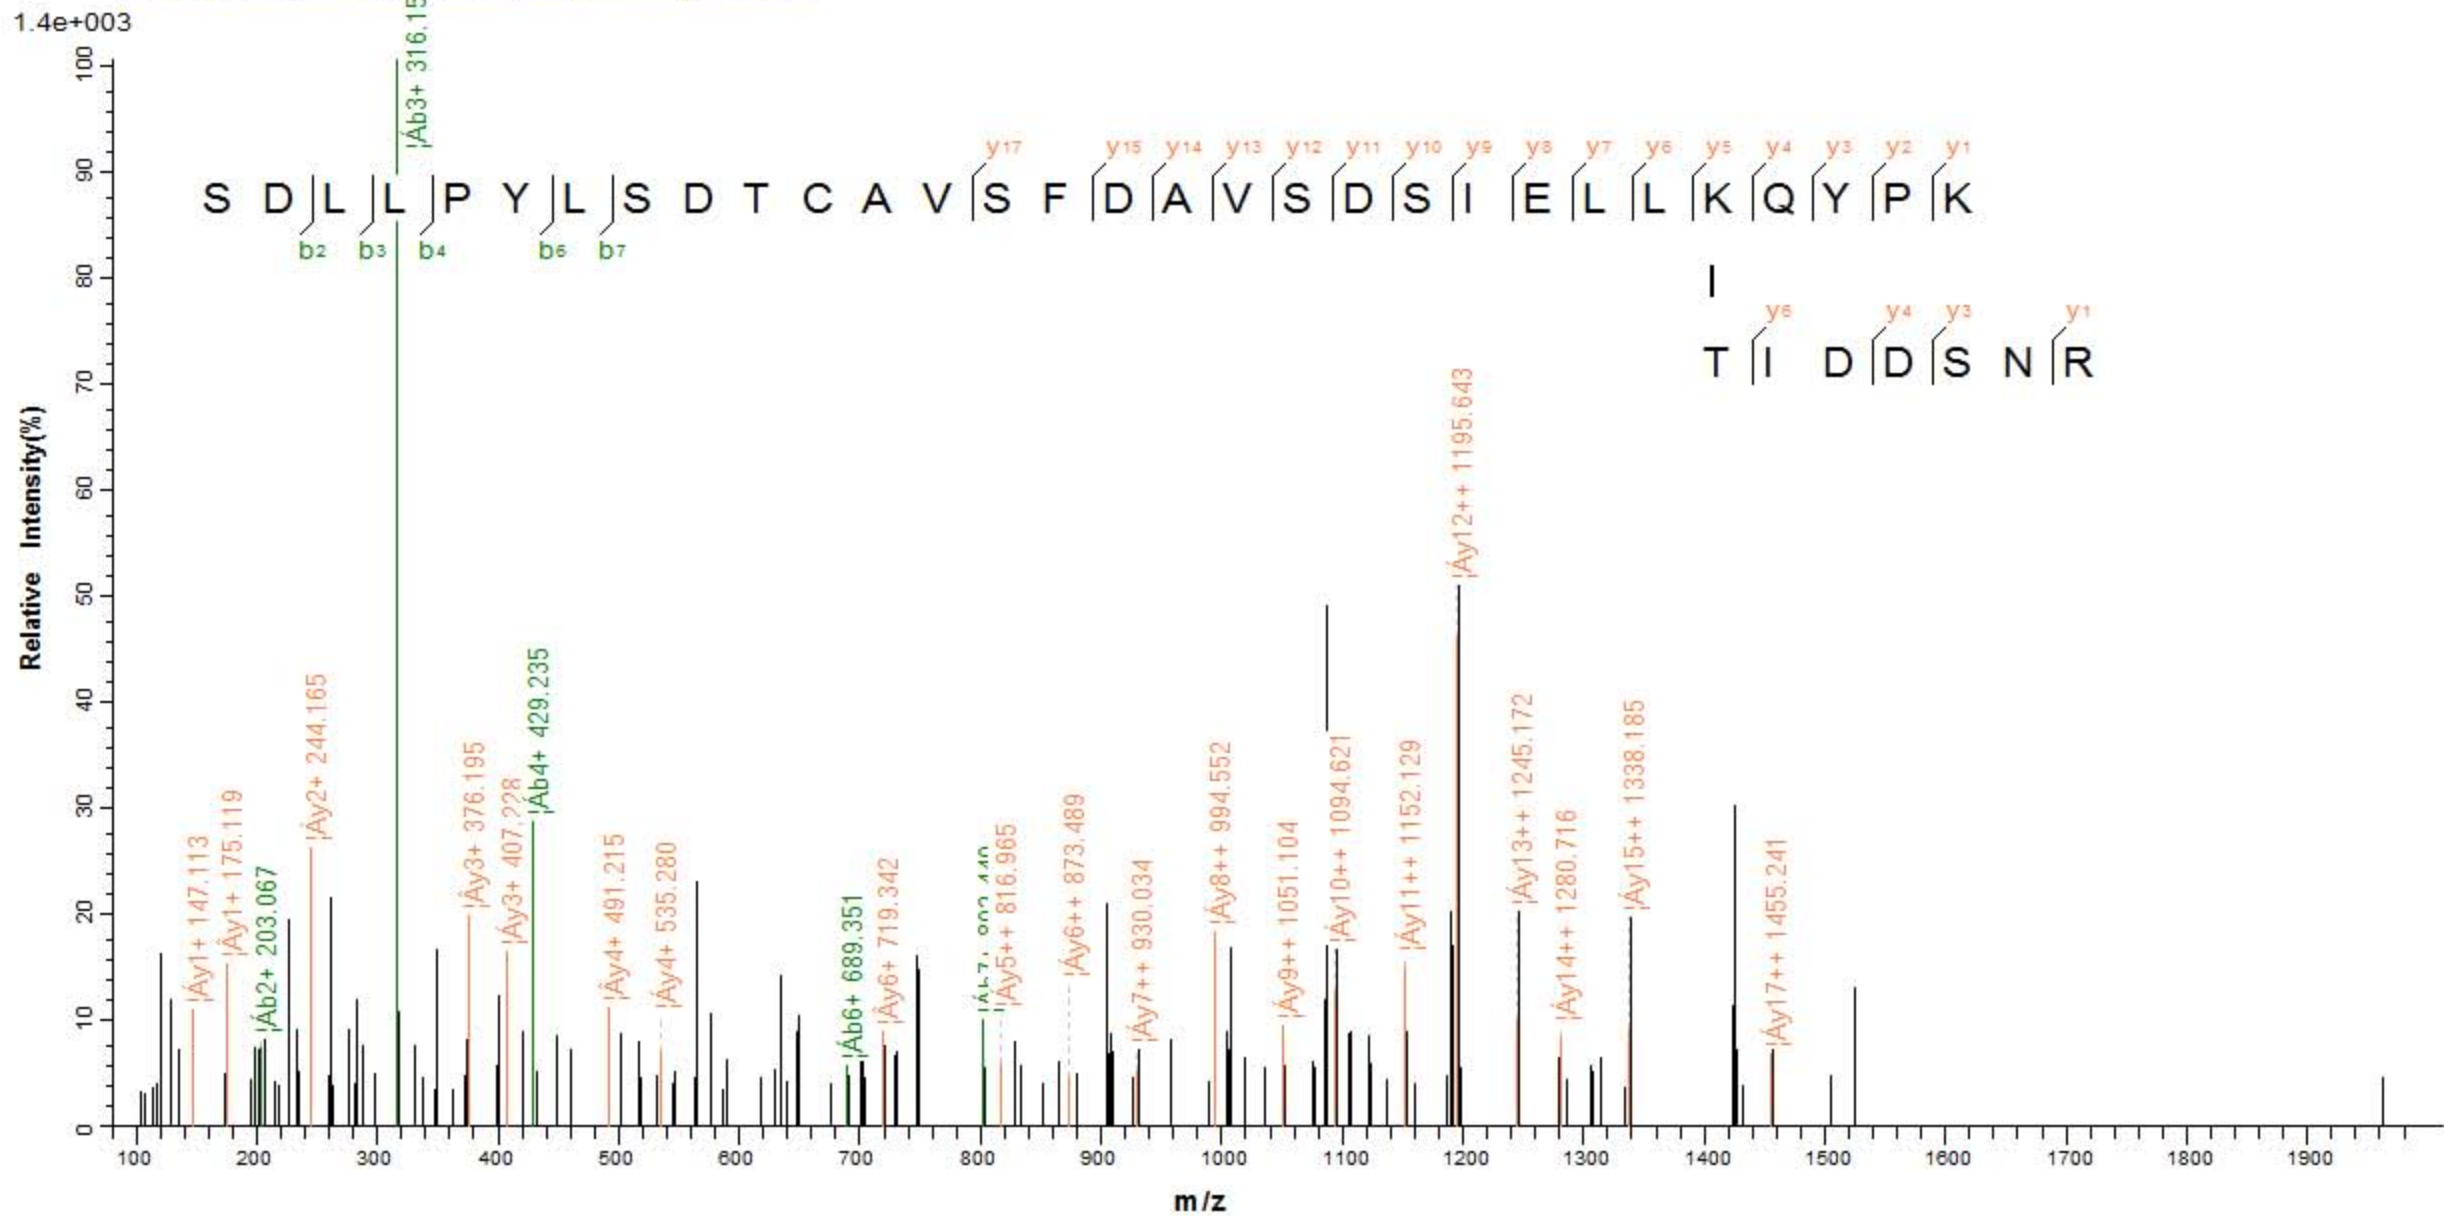

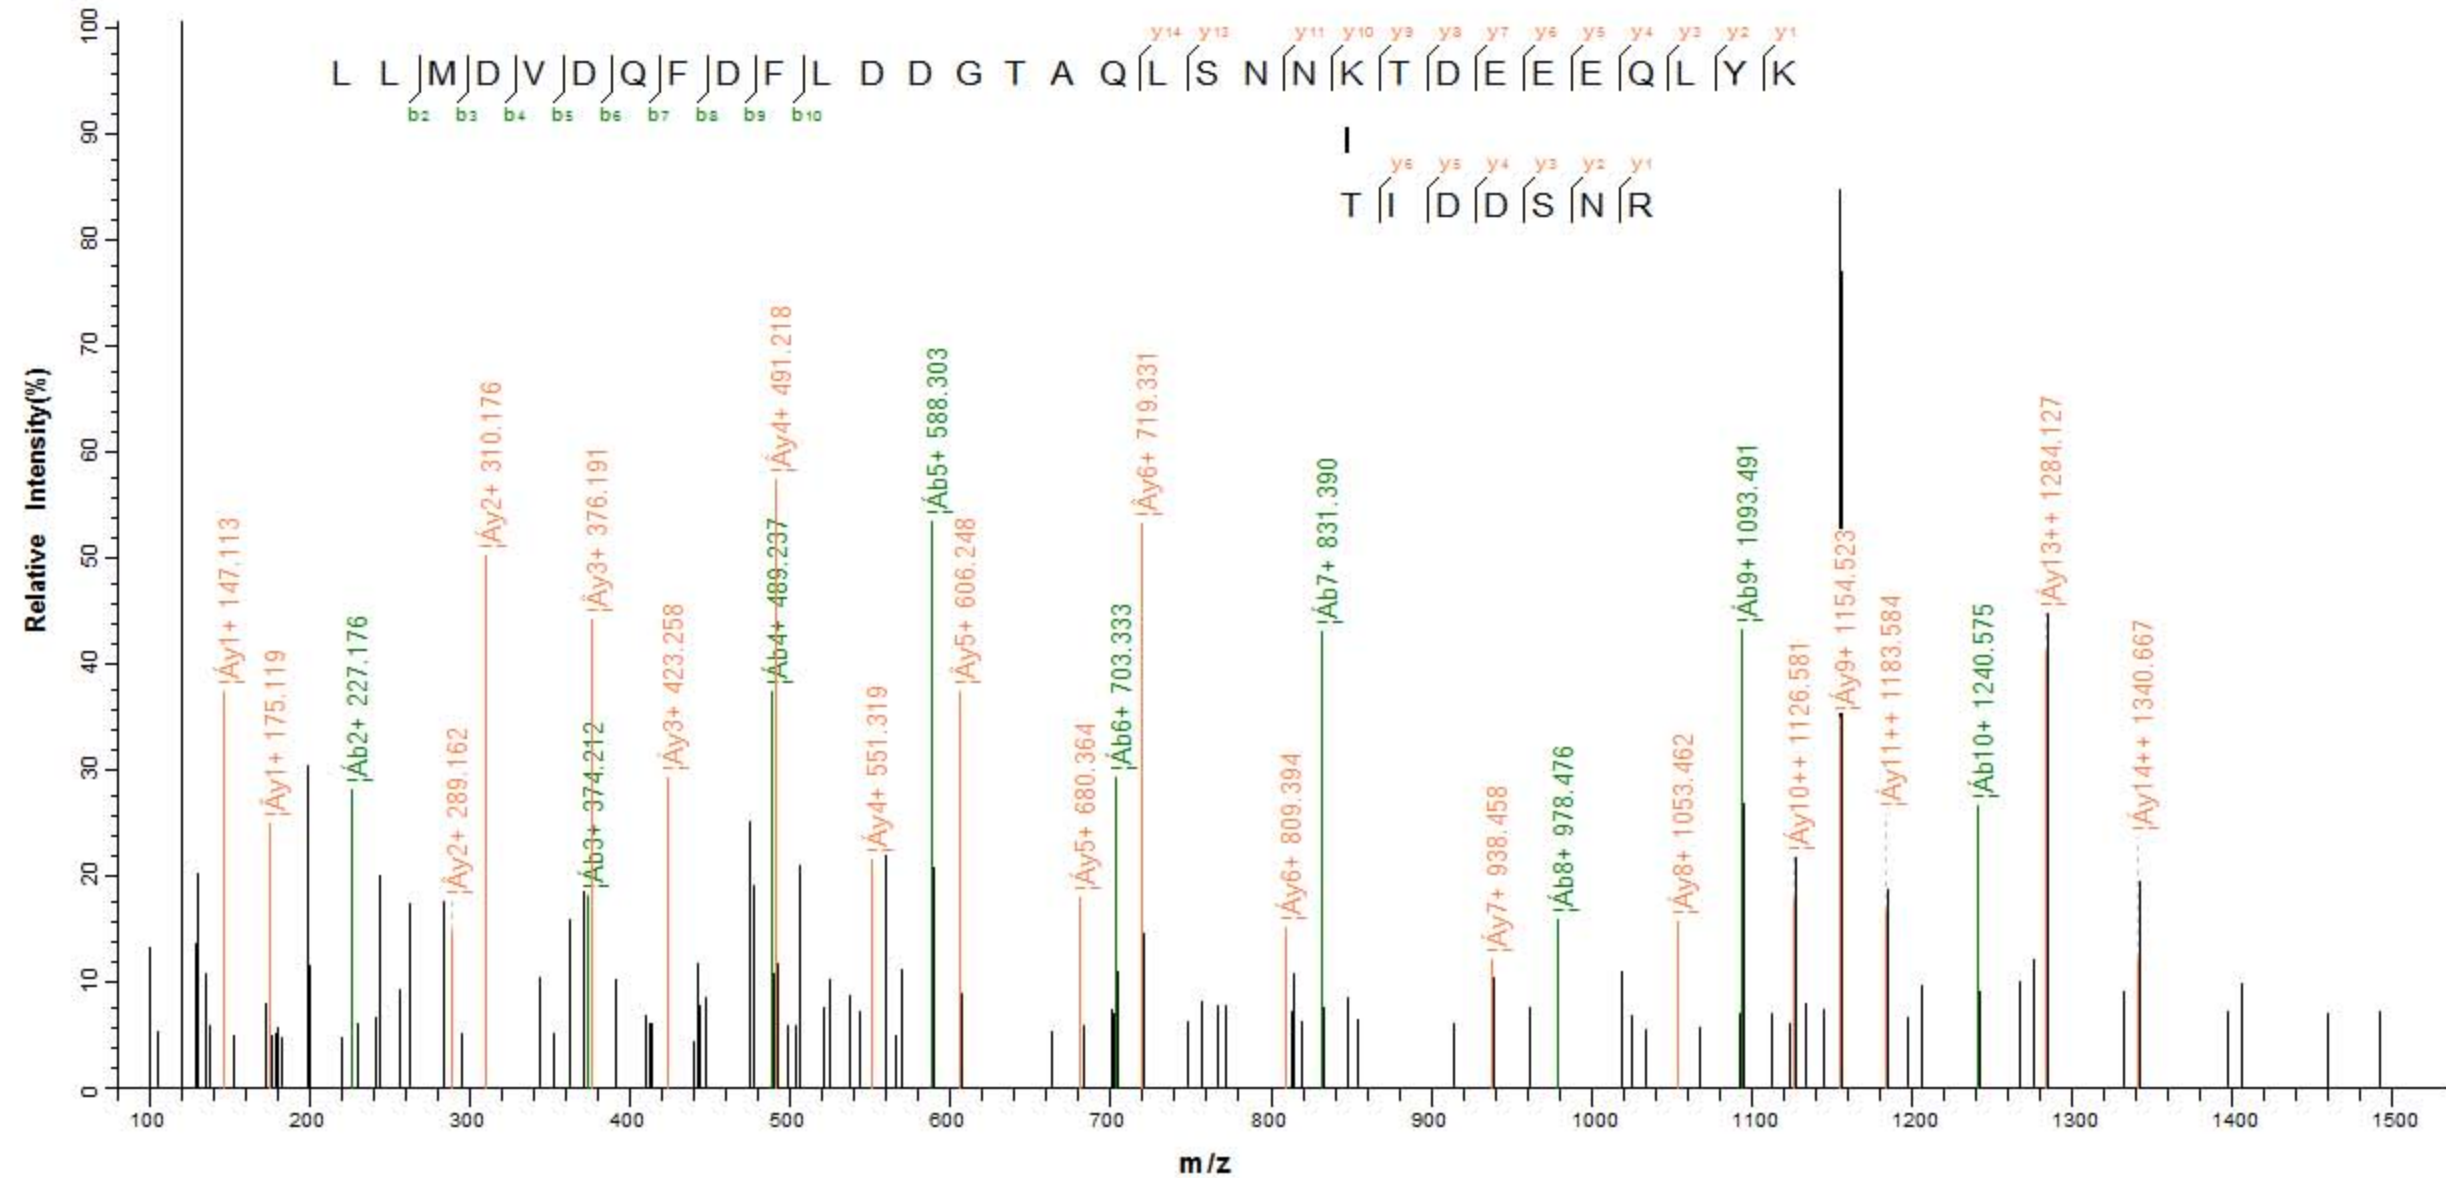

5.3e+003

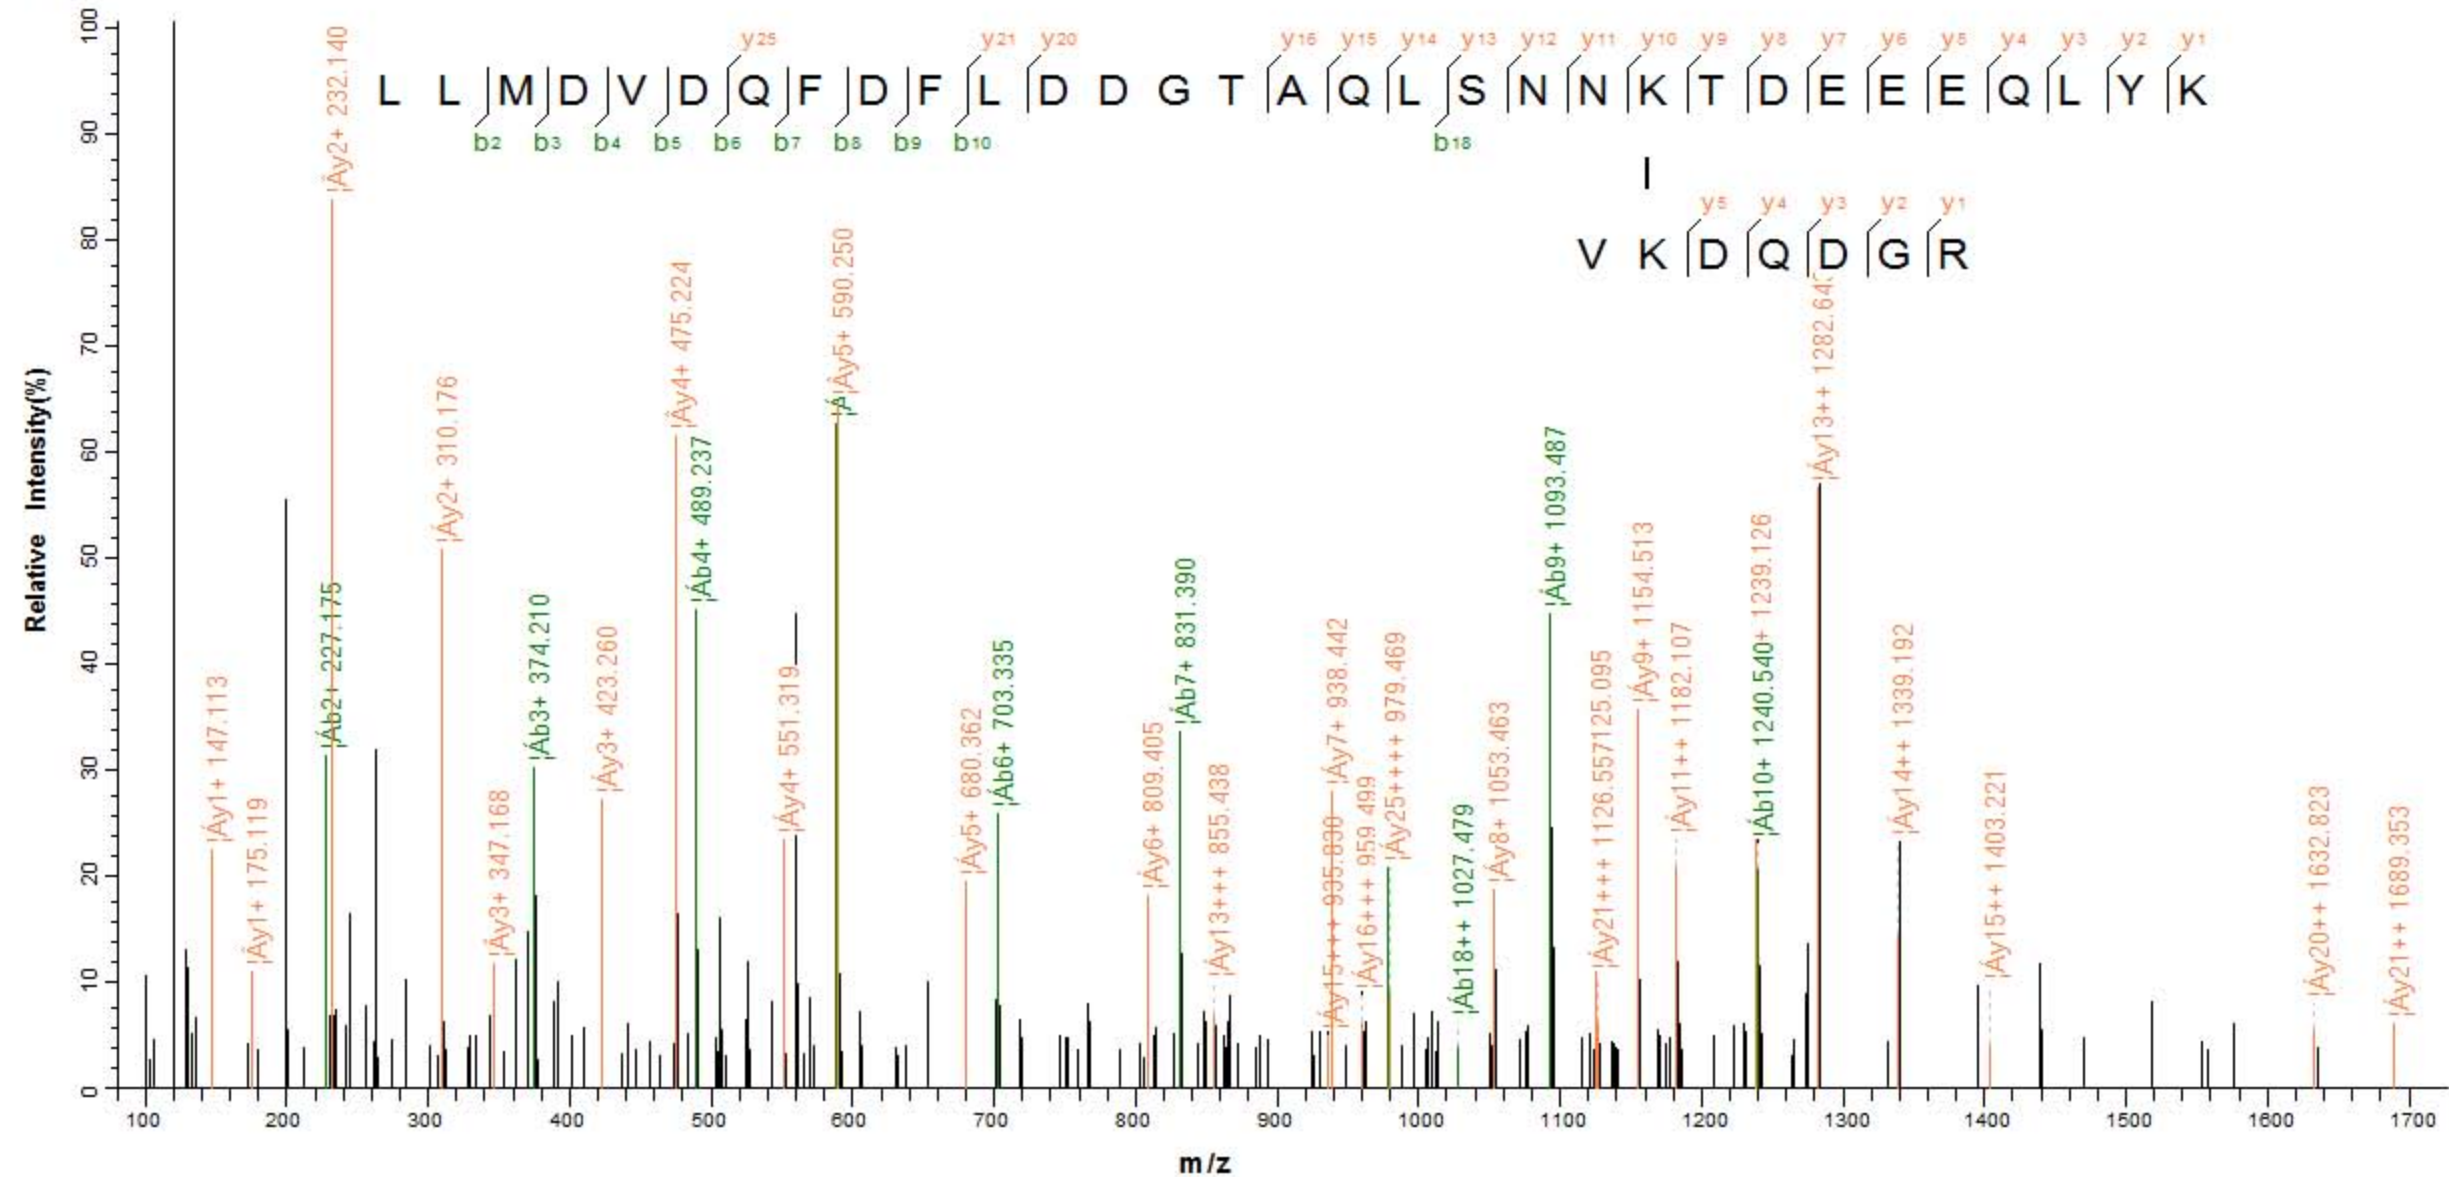

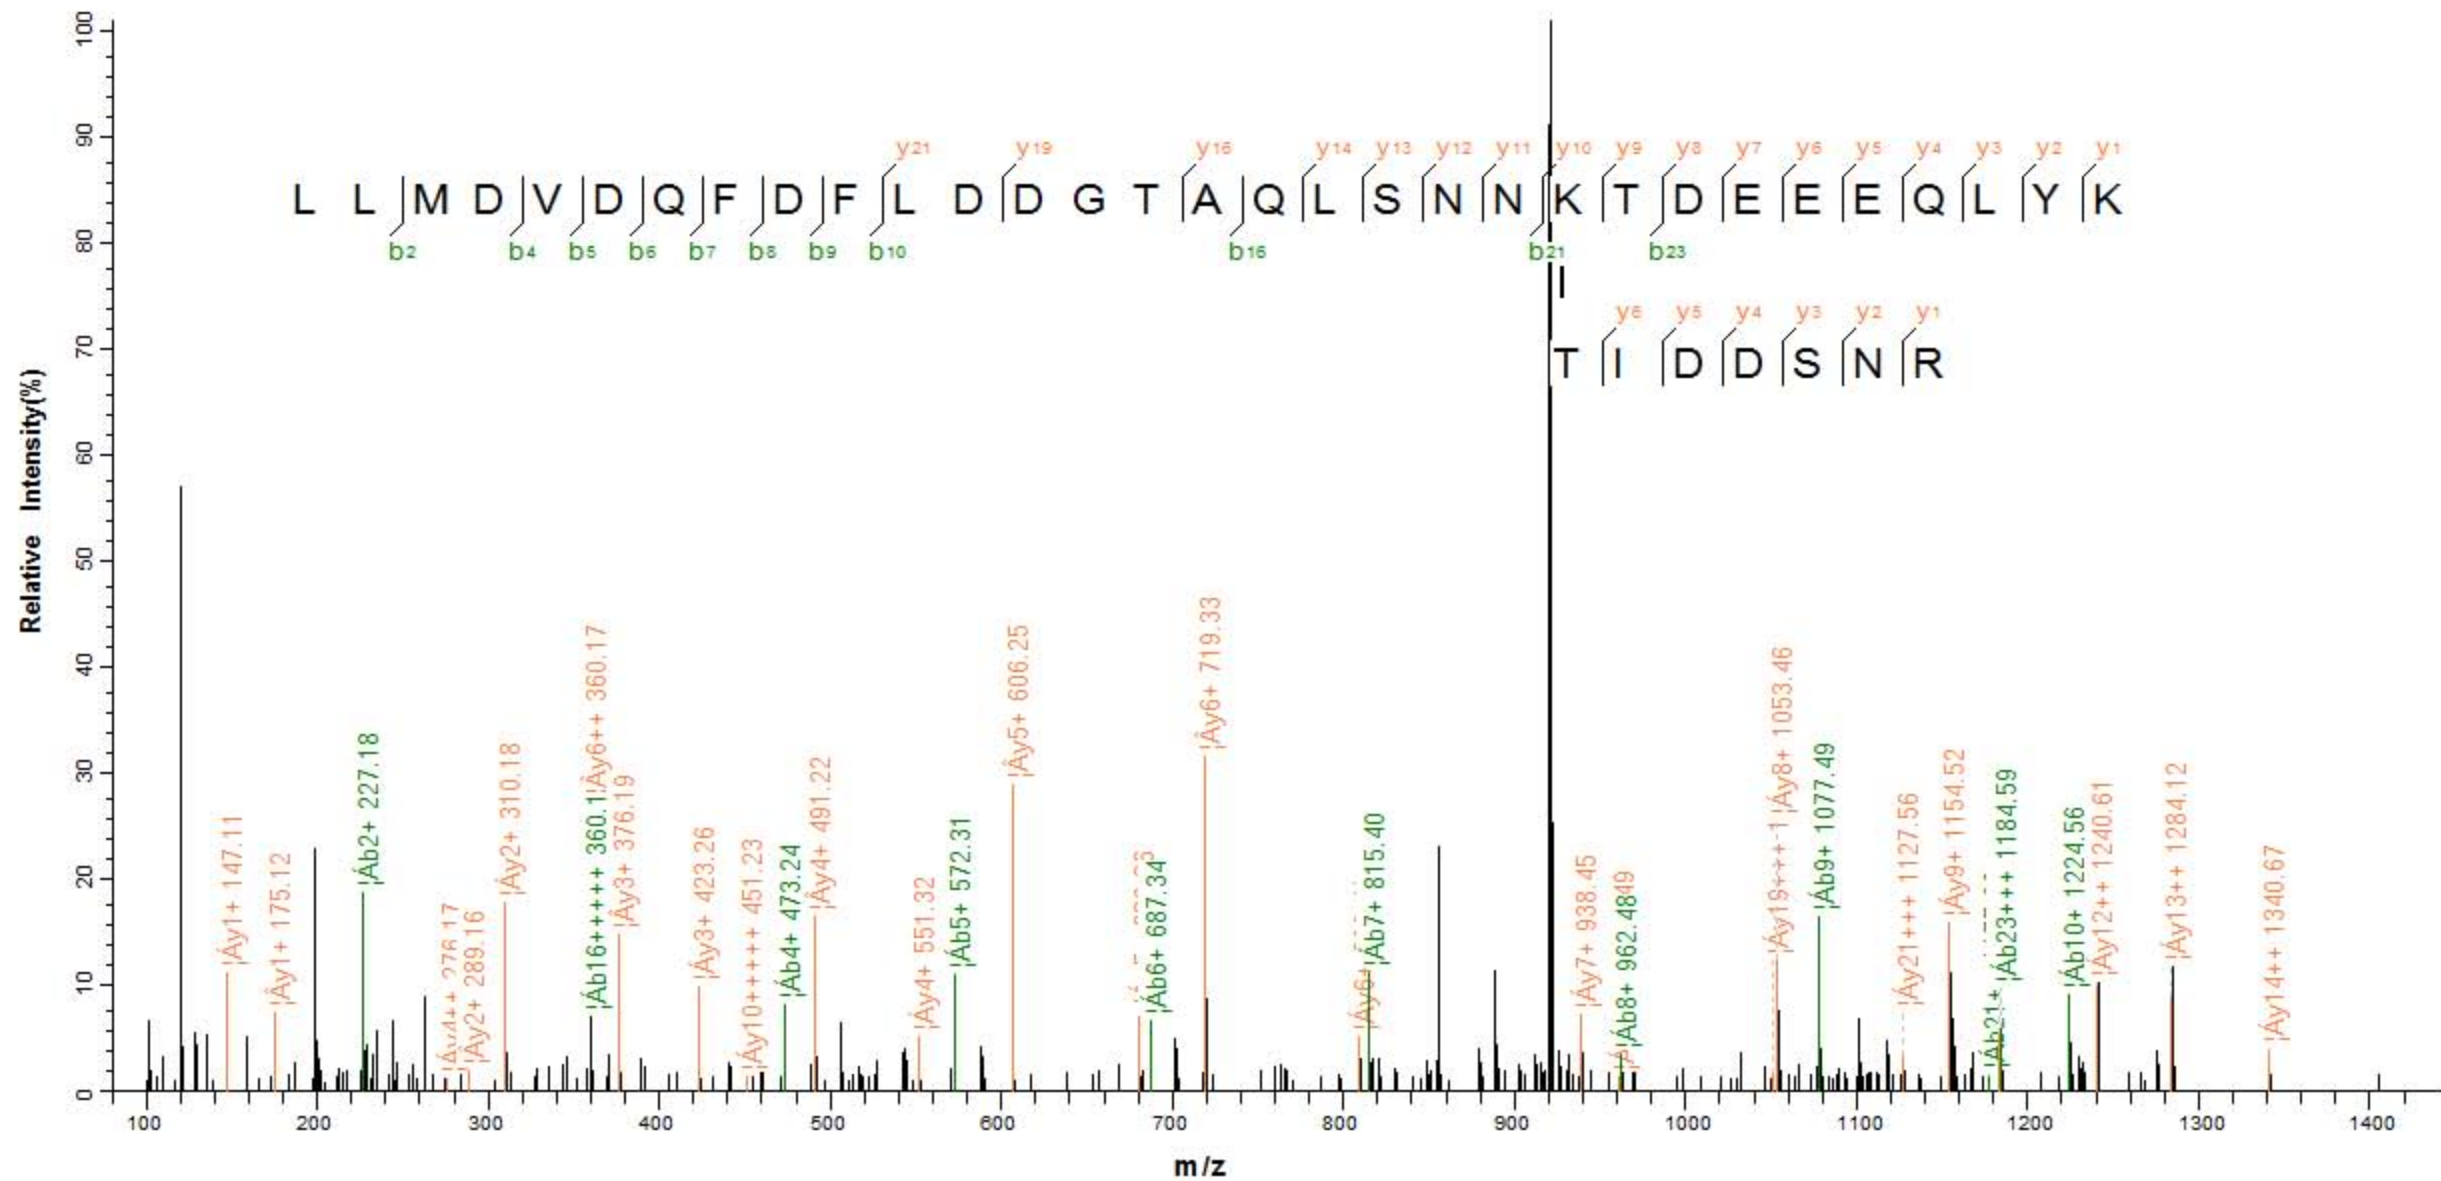

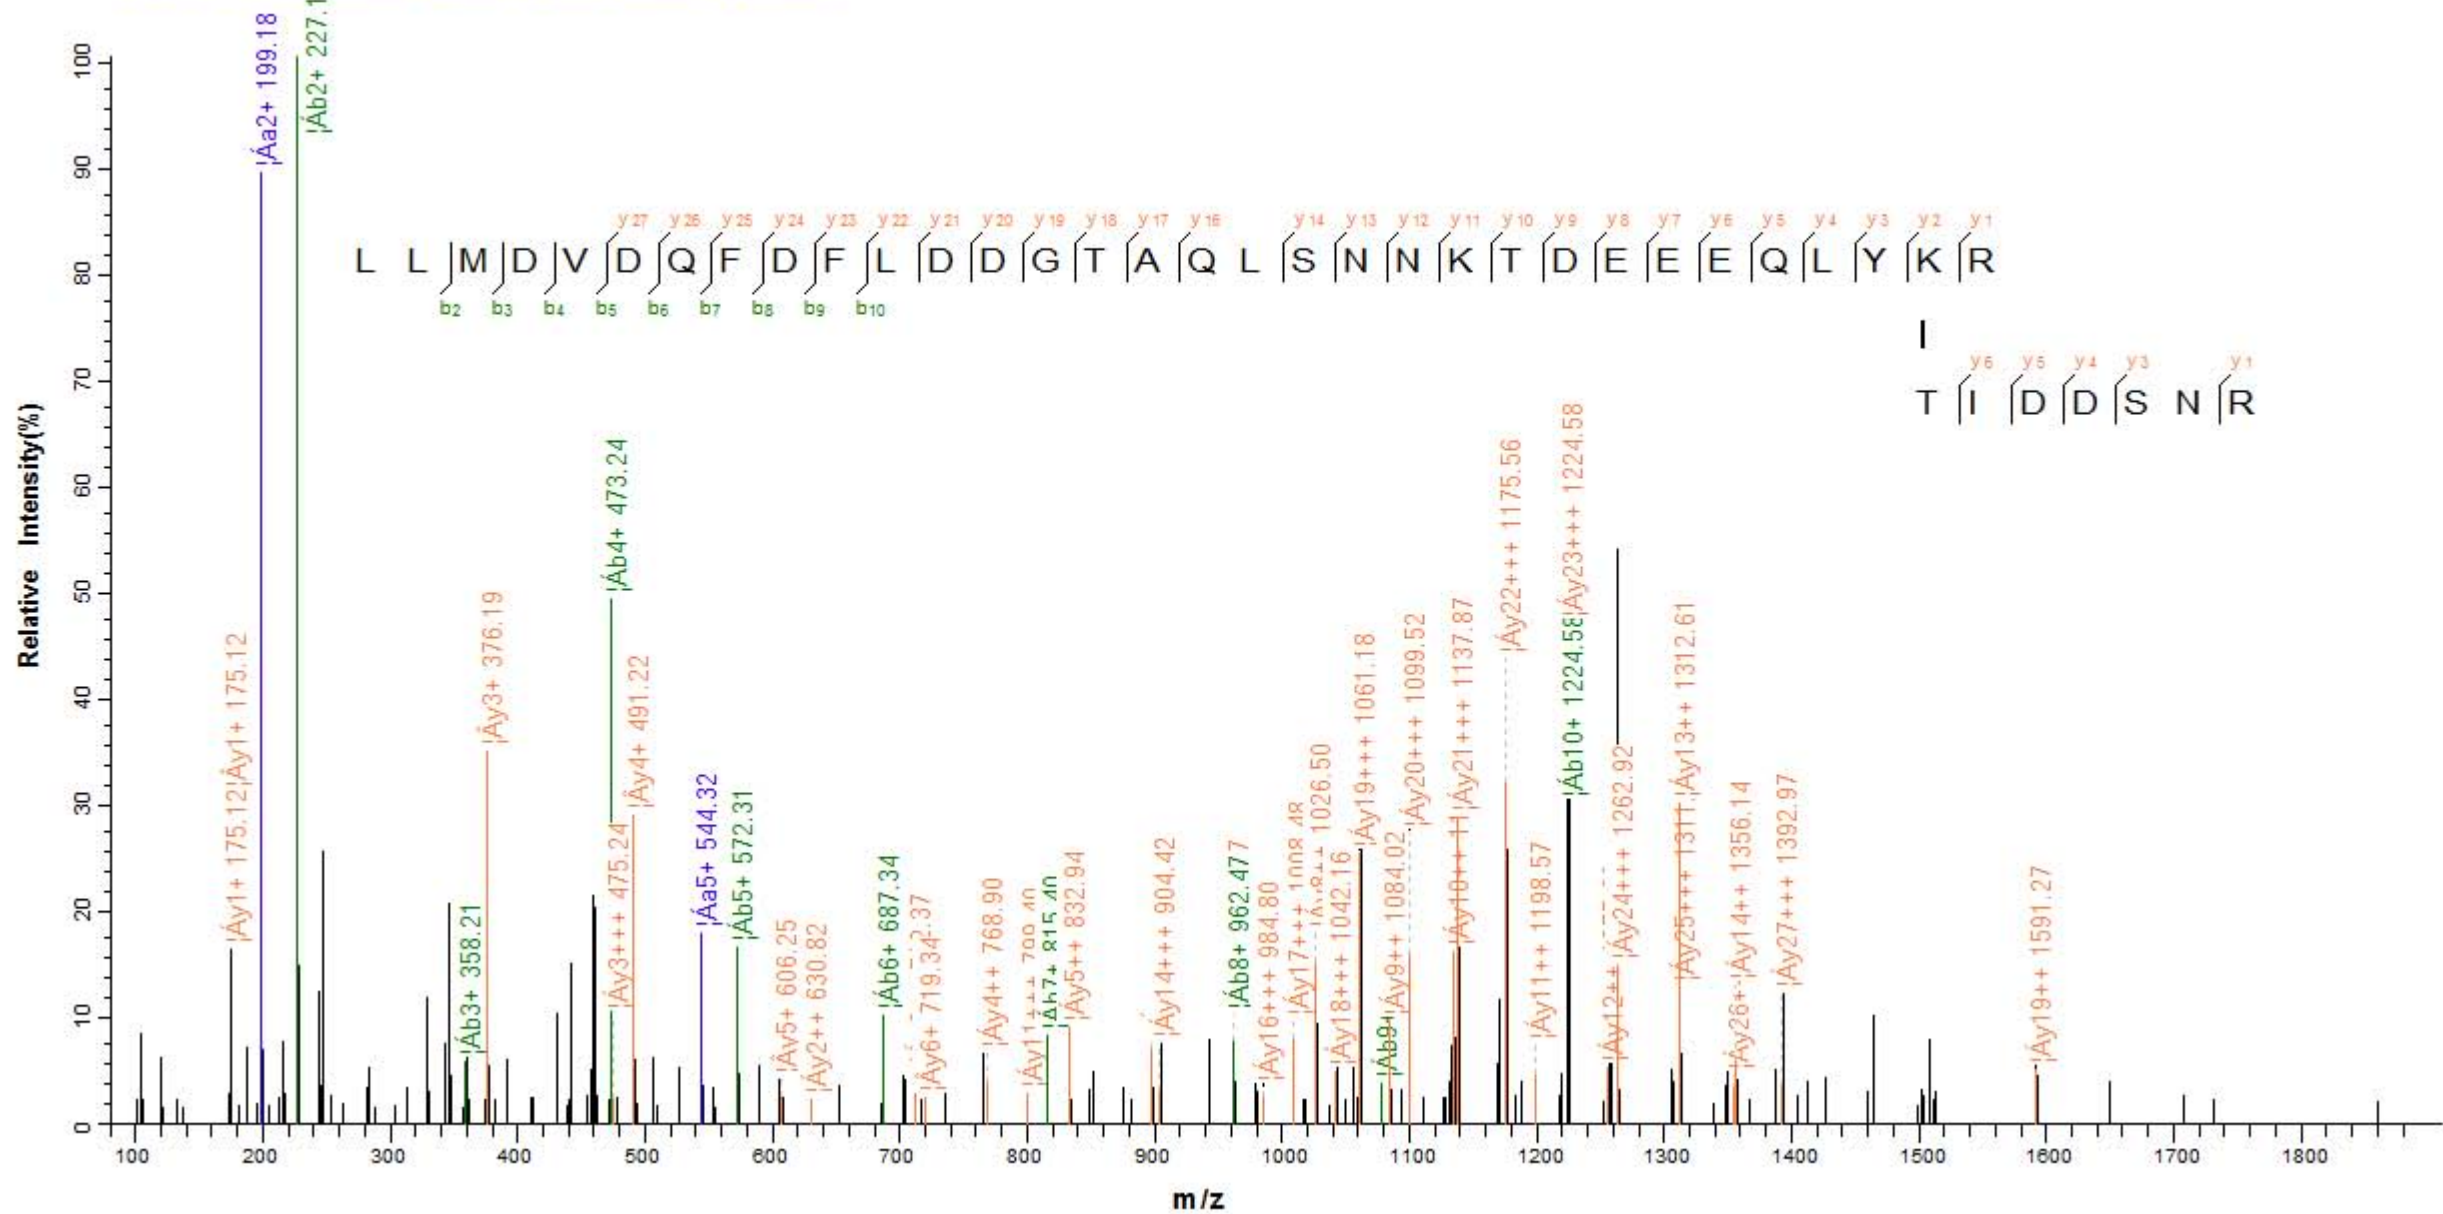

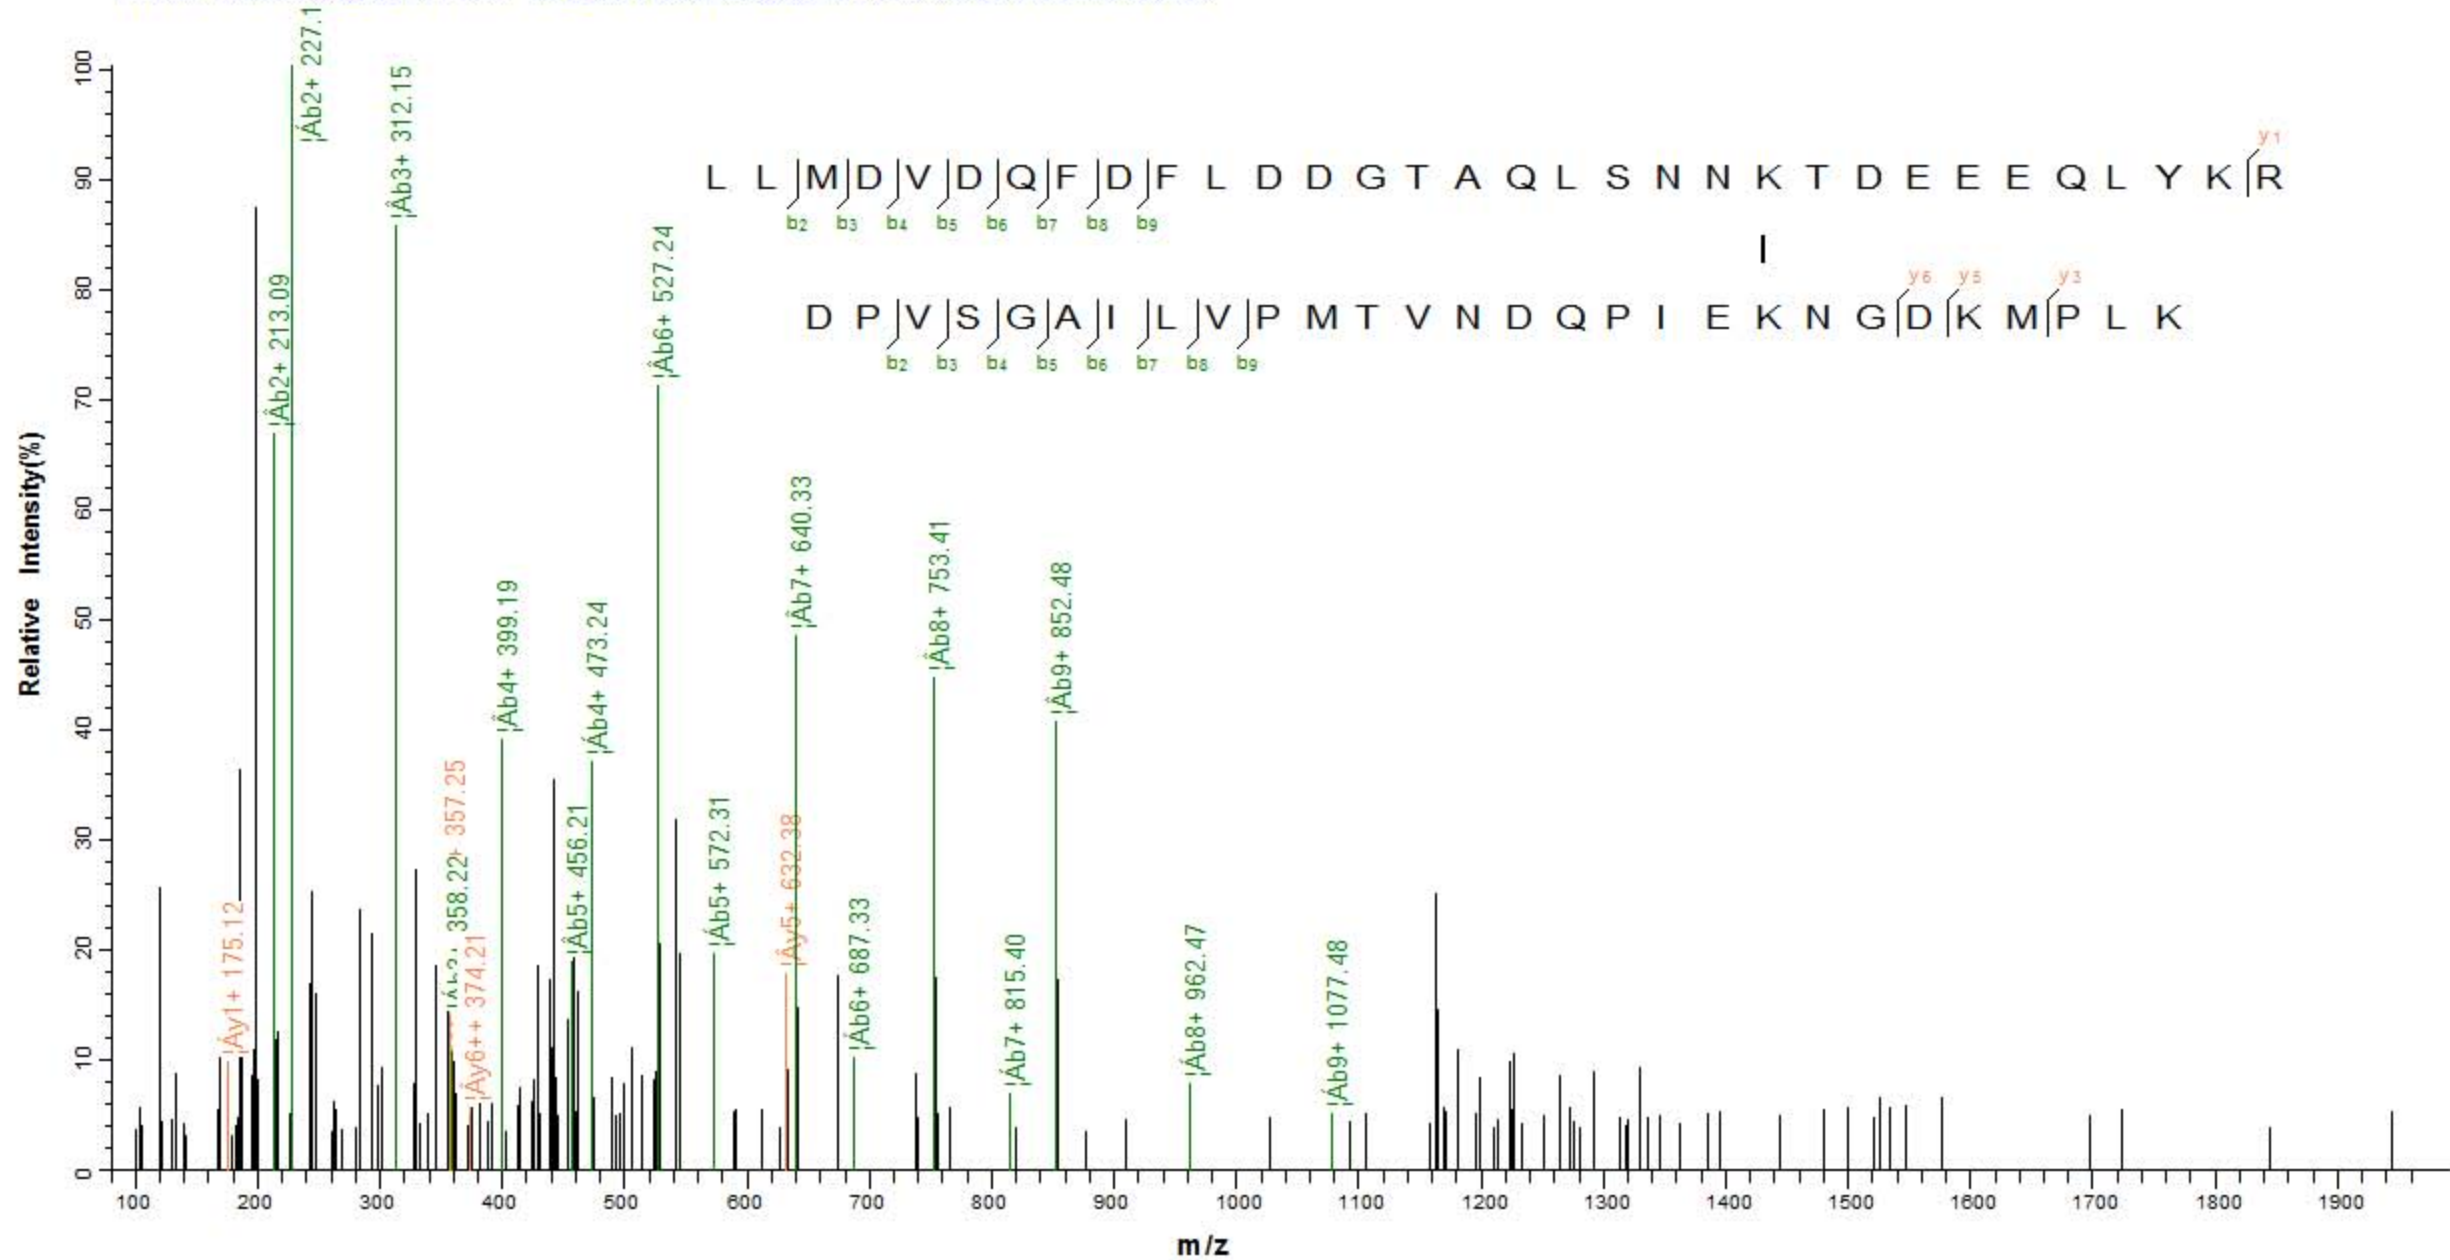



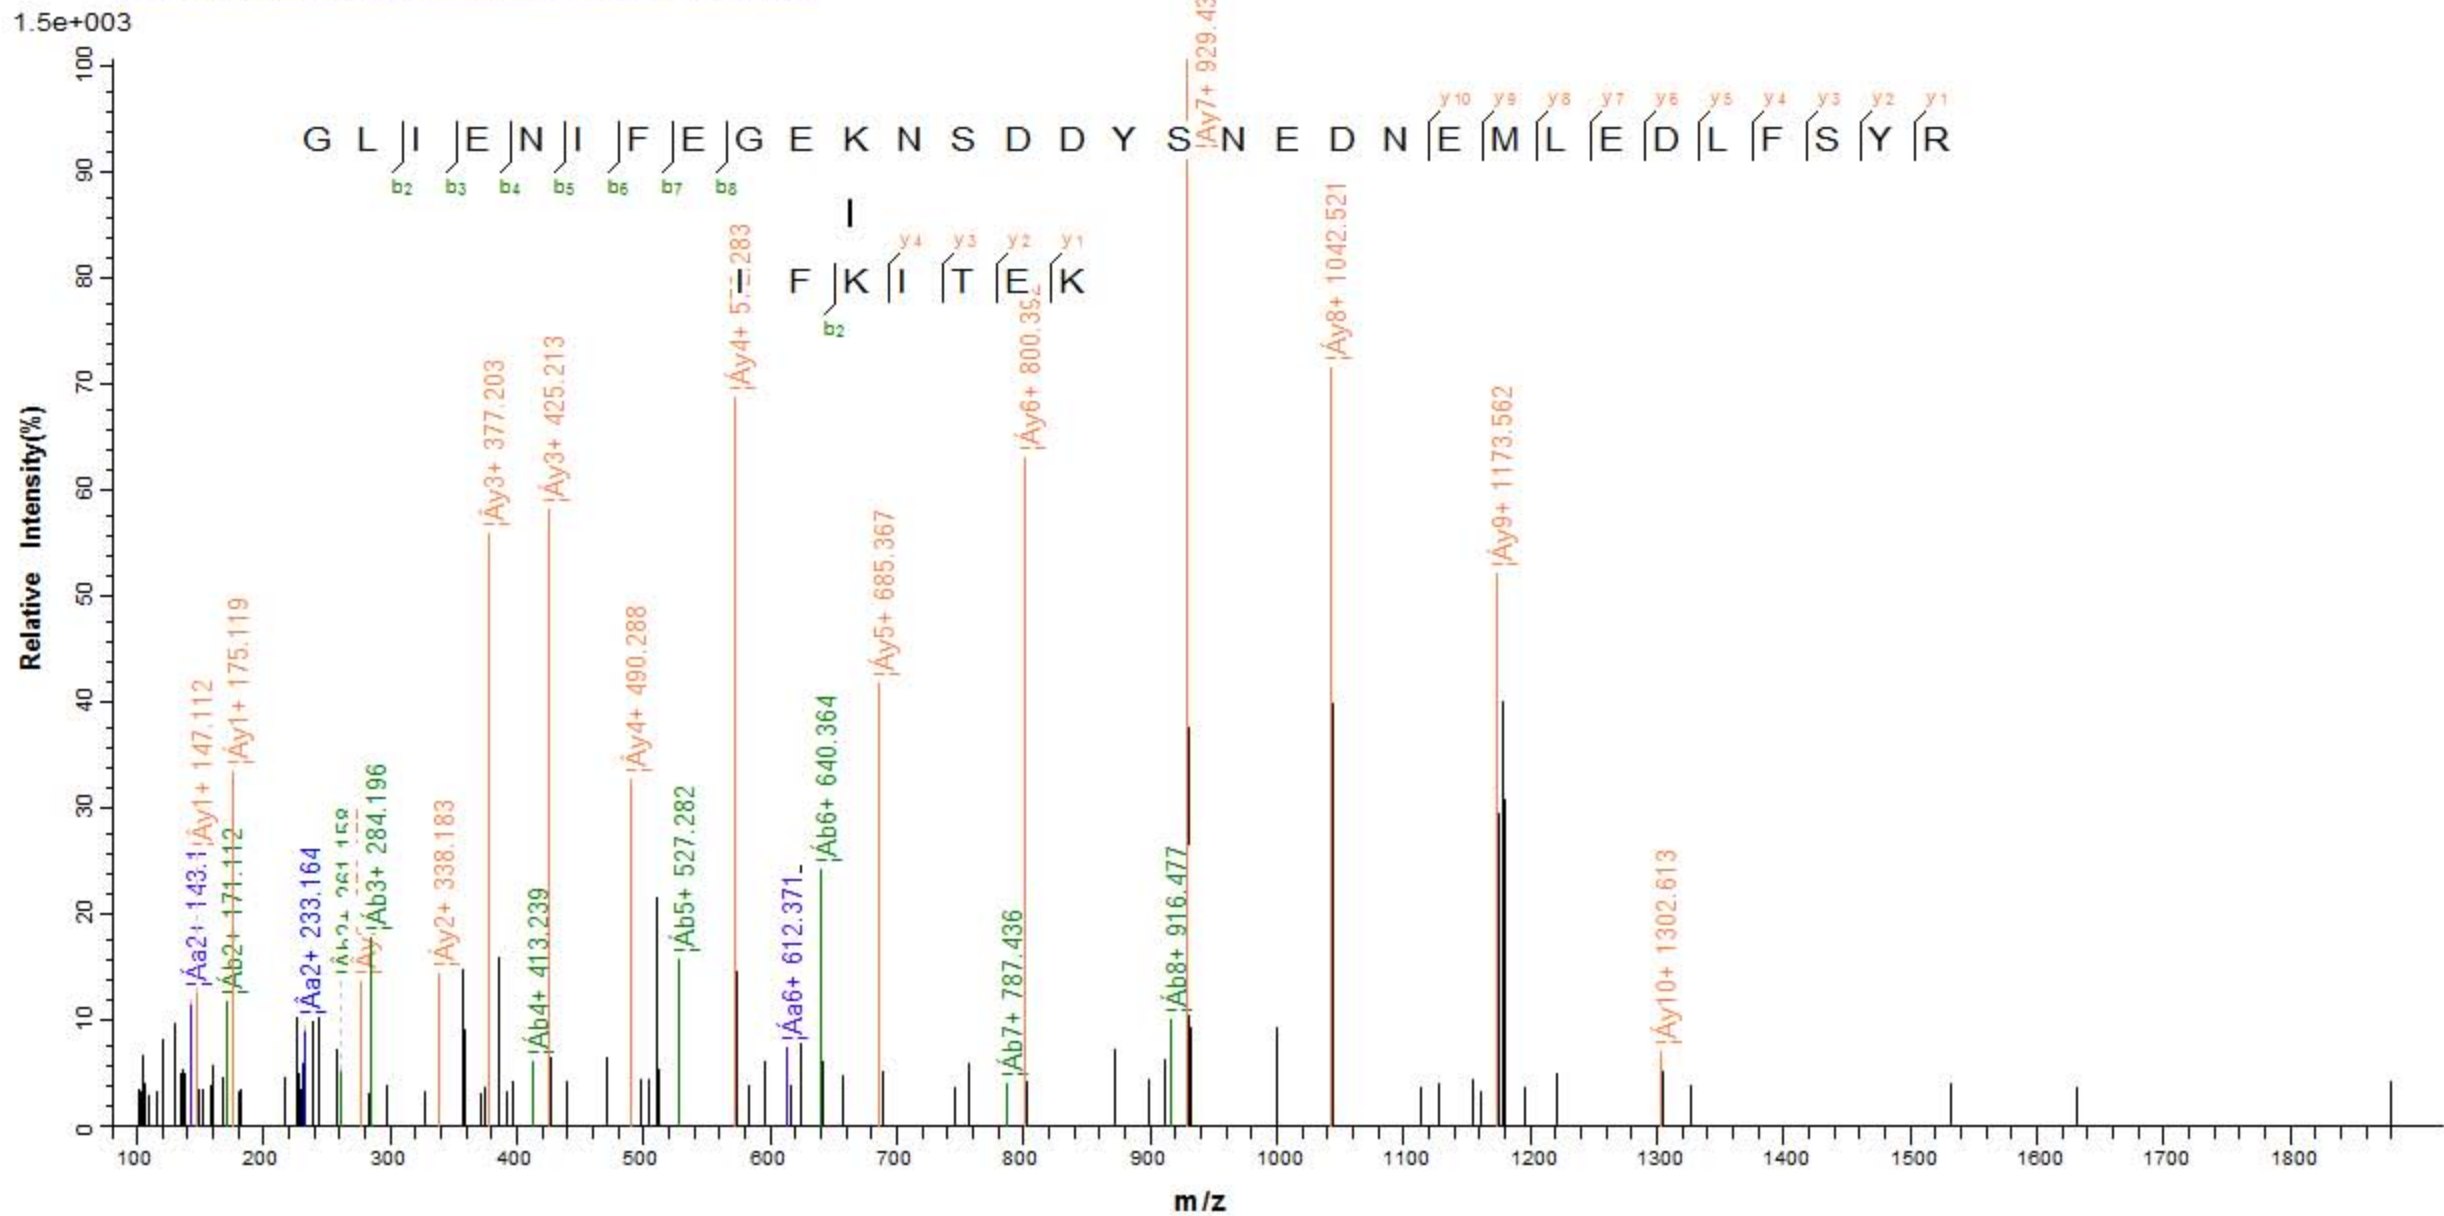

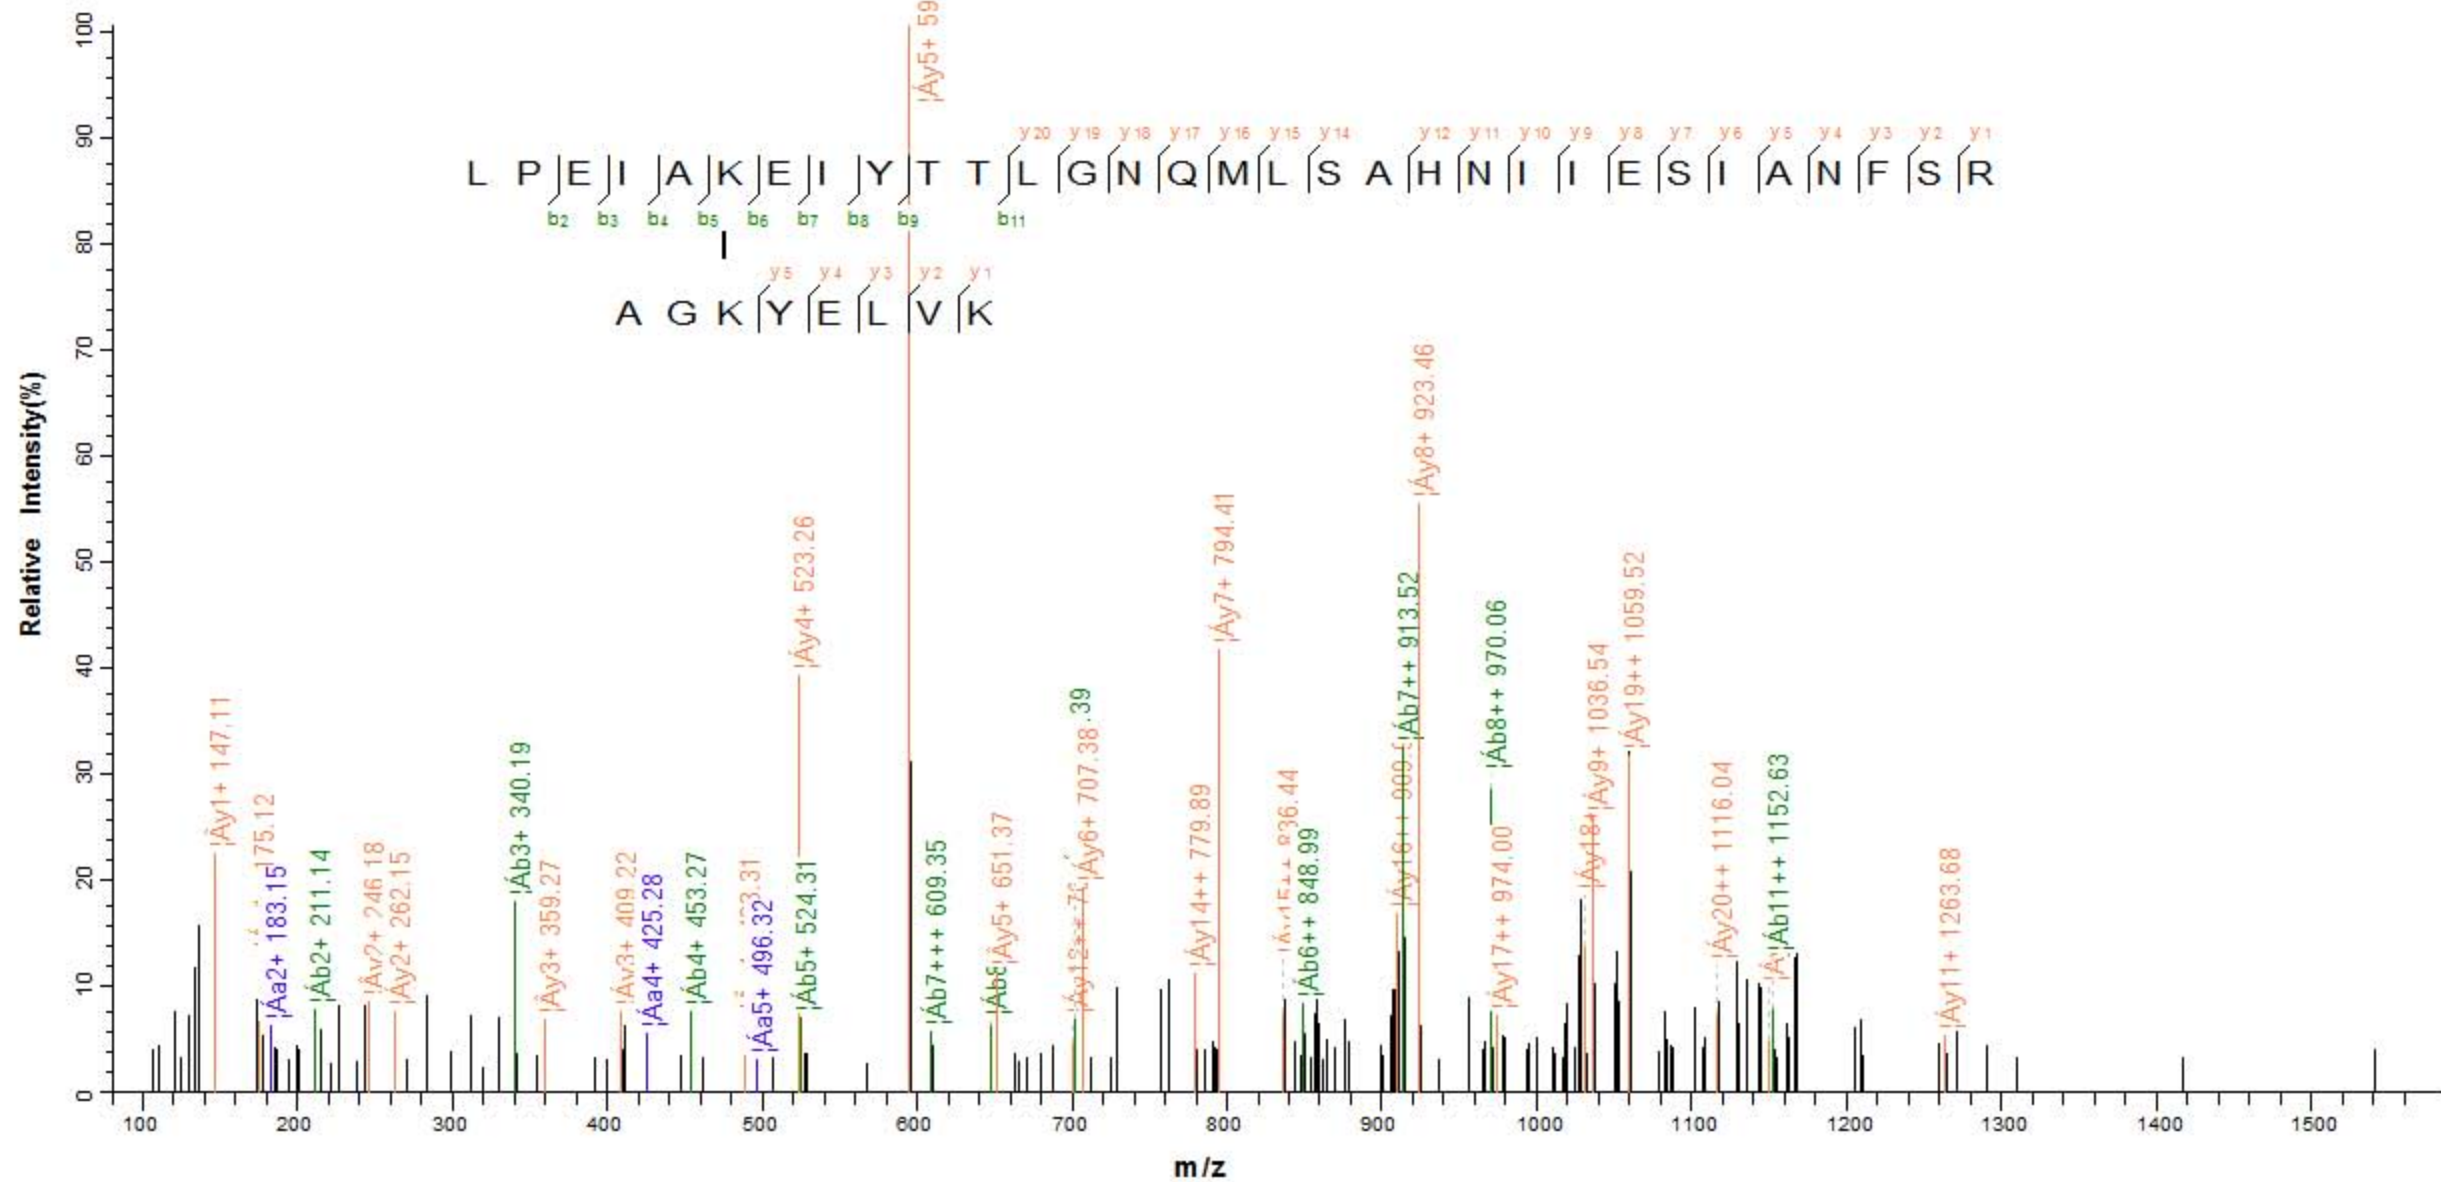

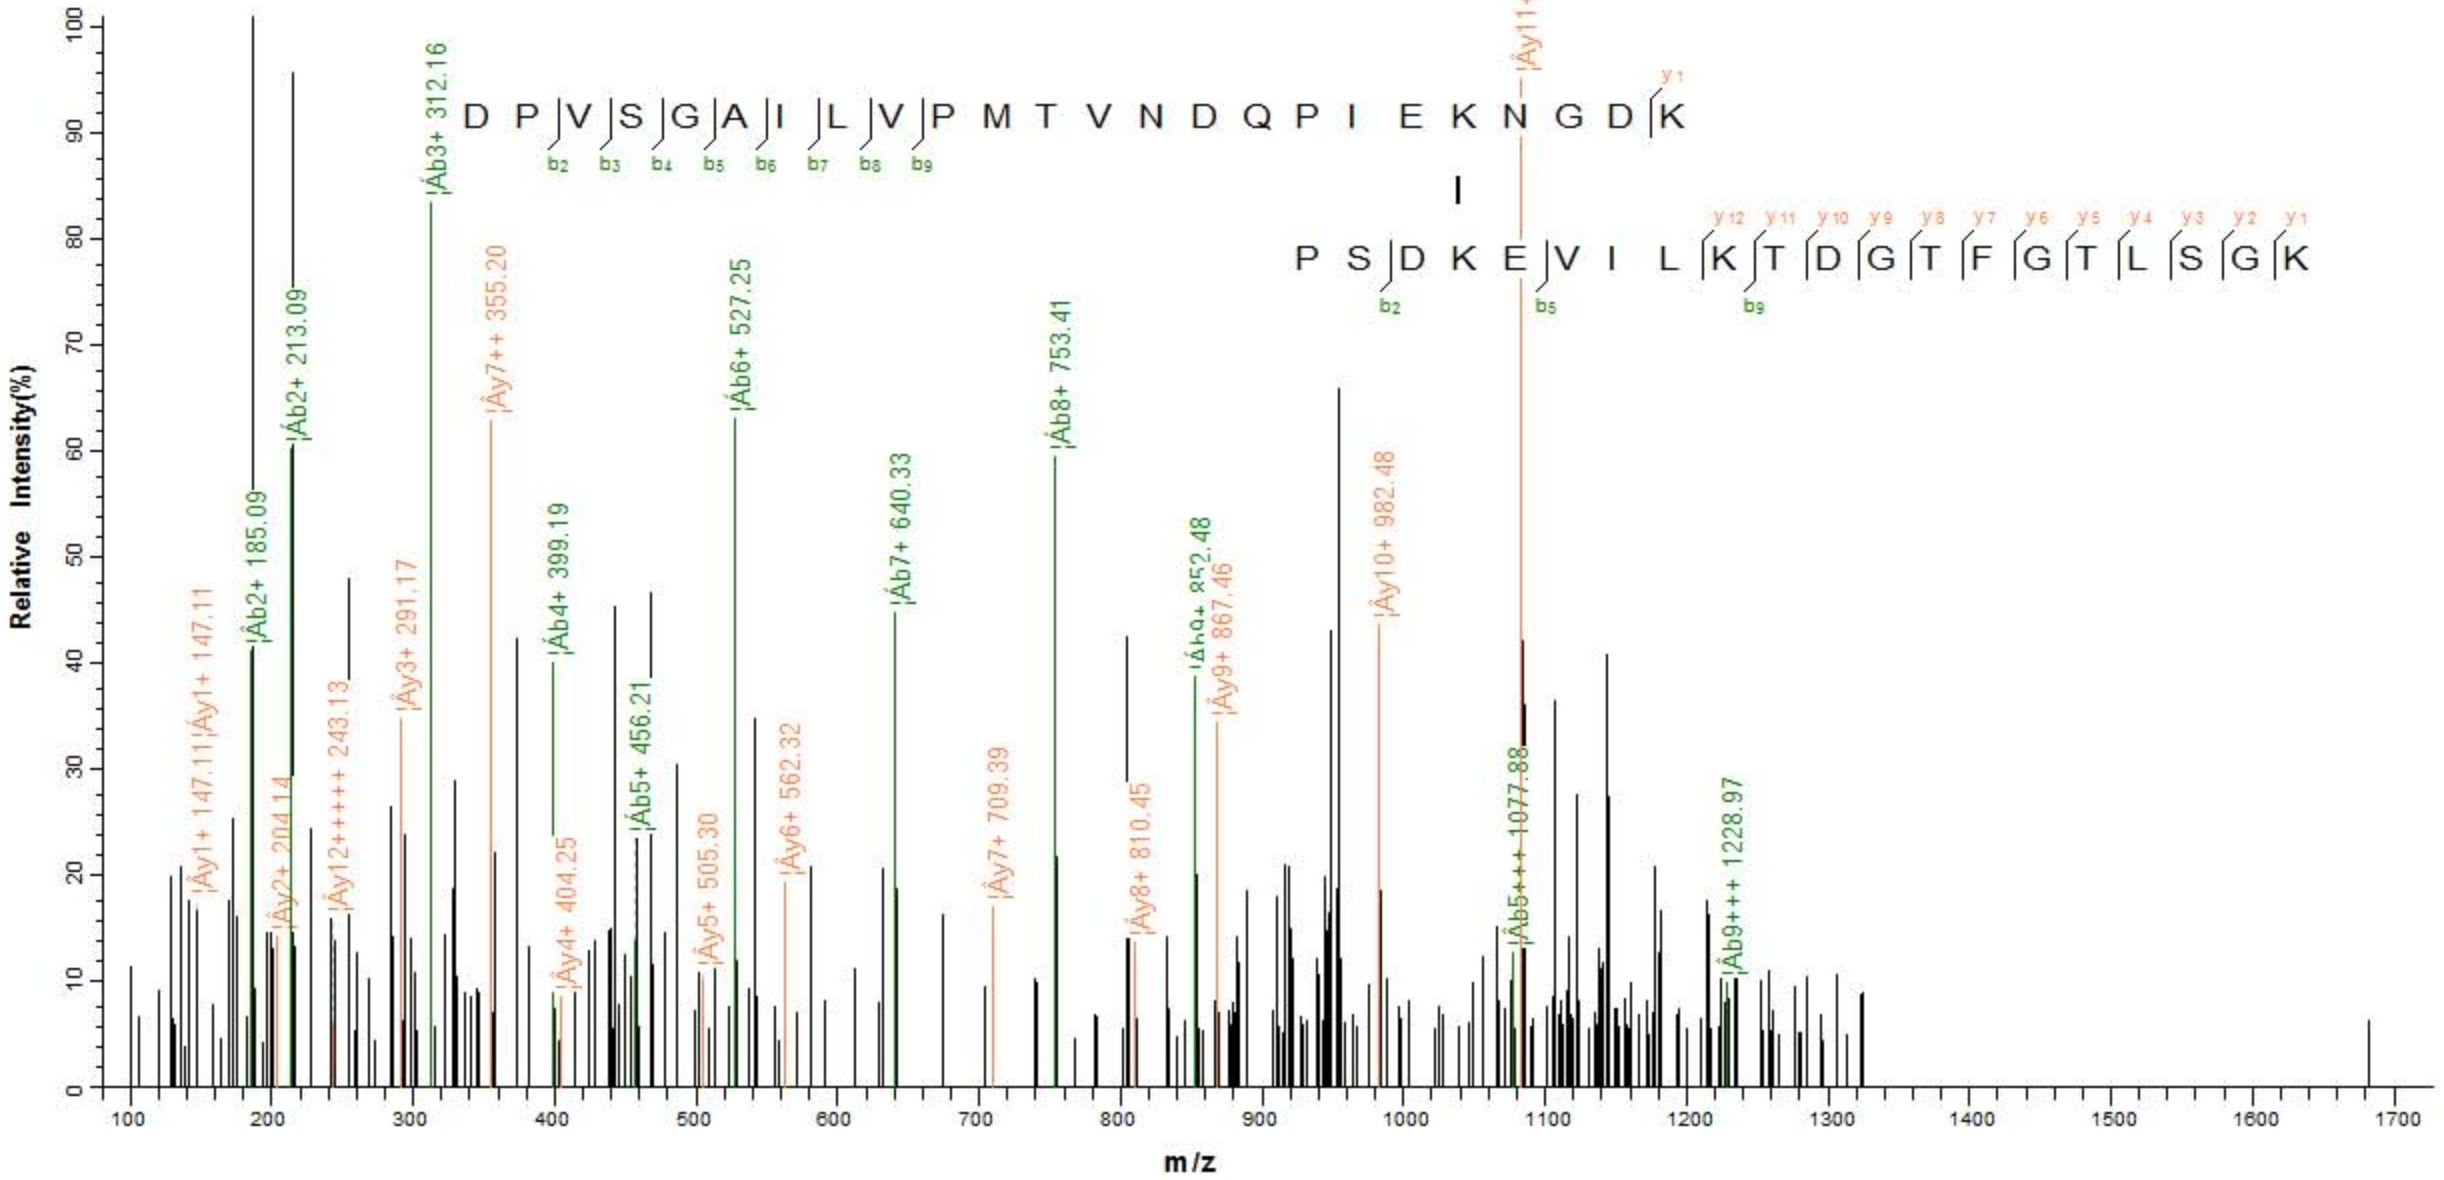

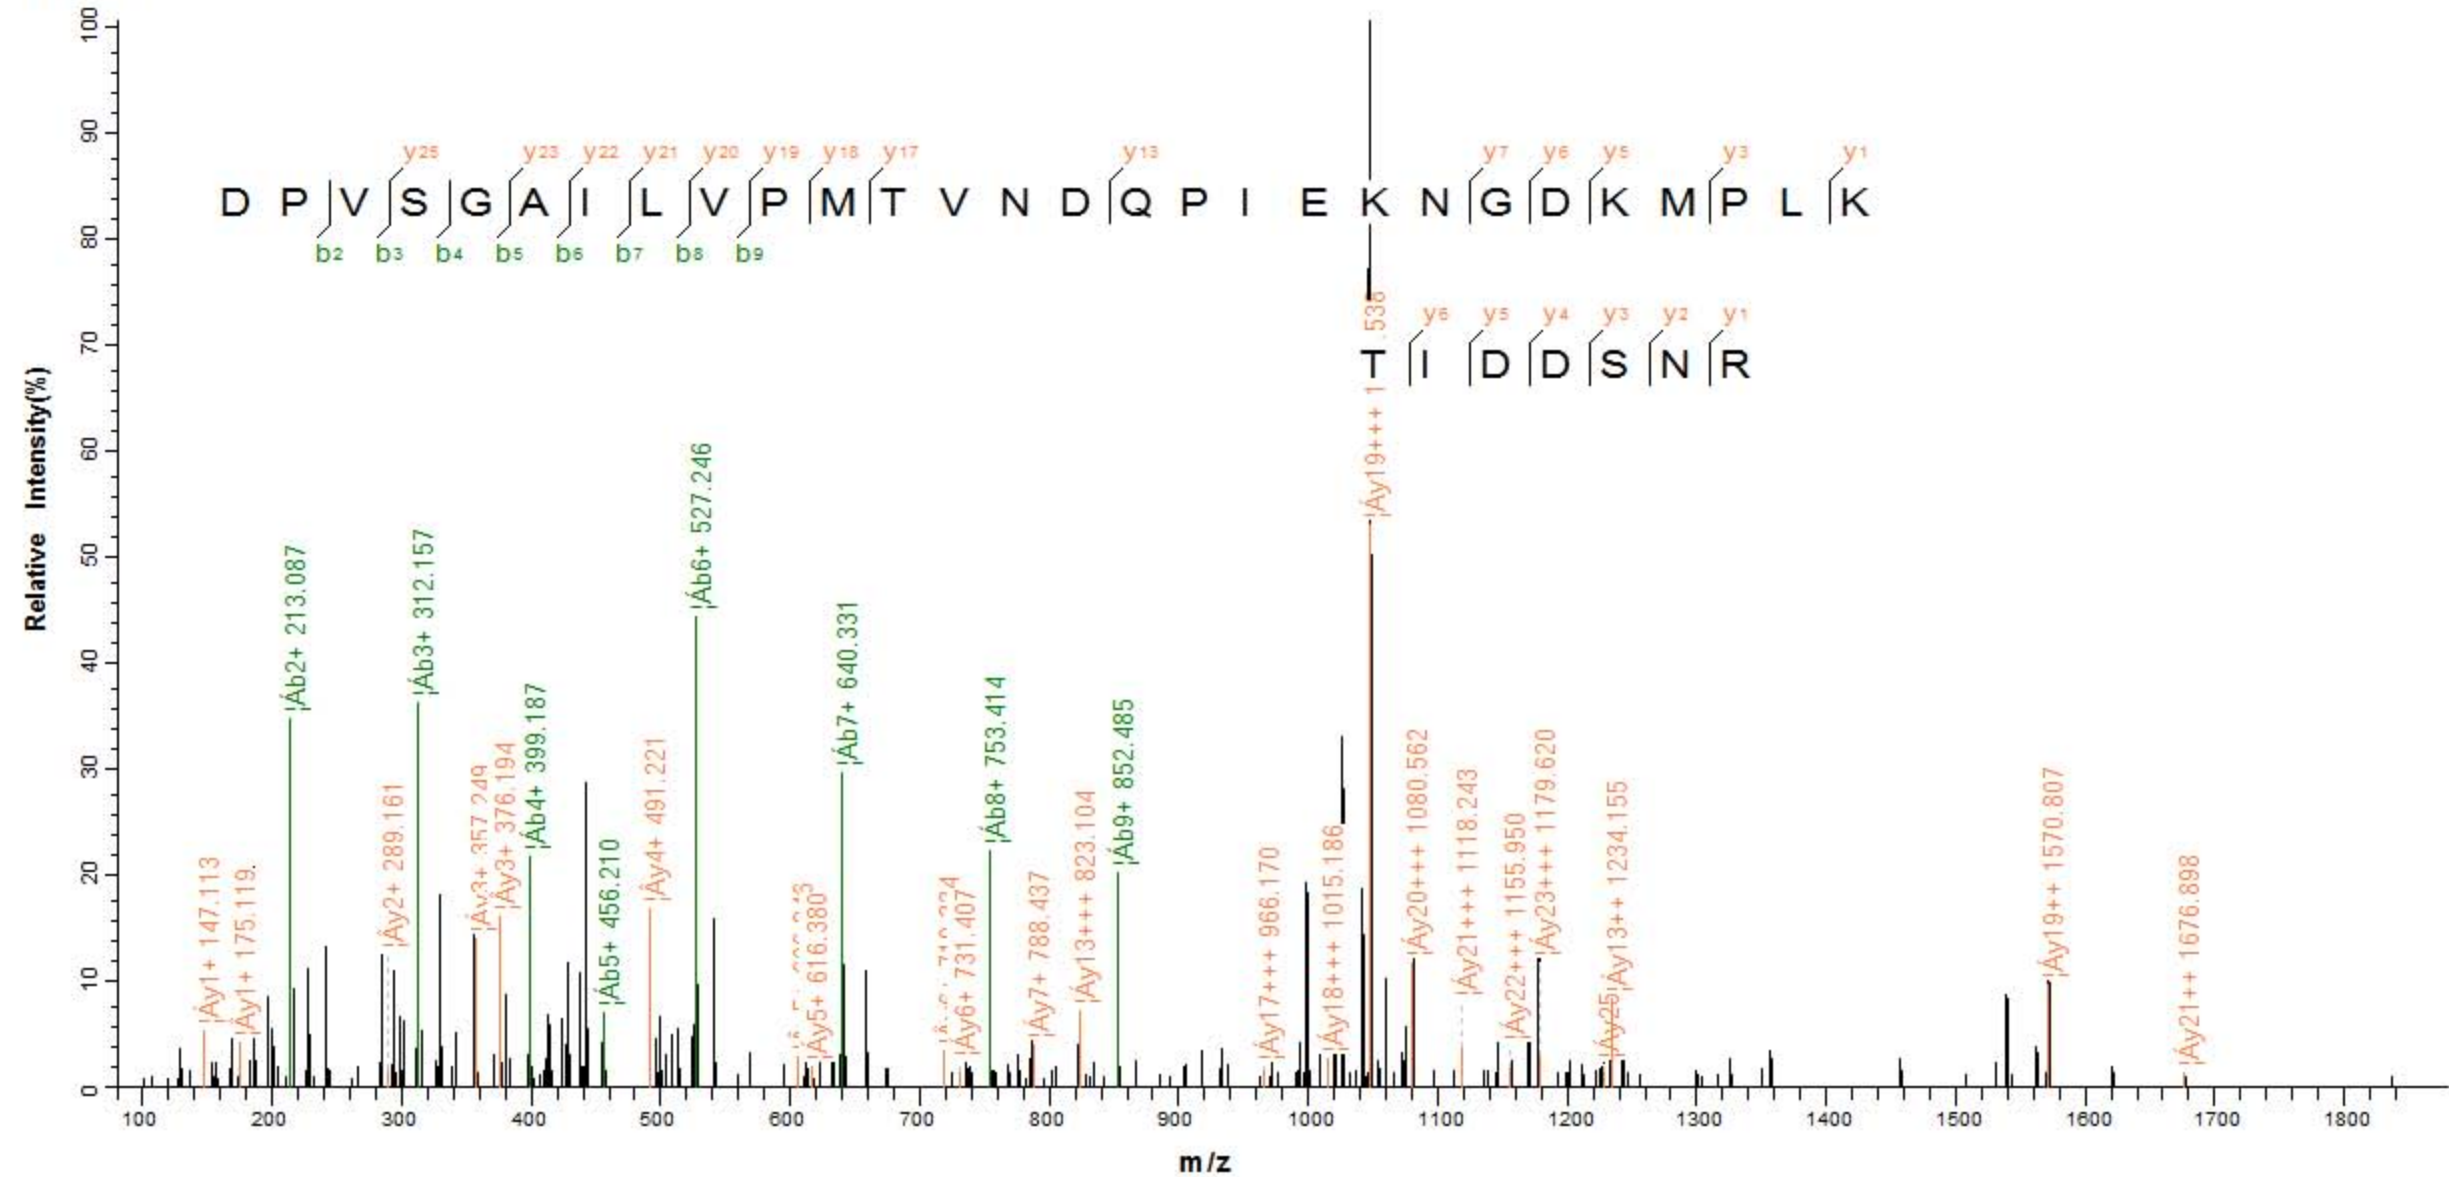

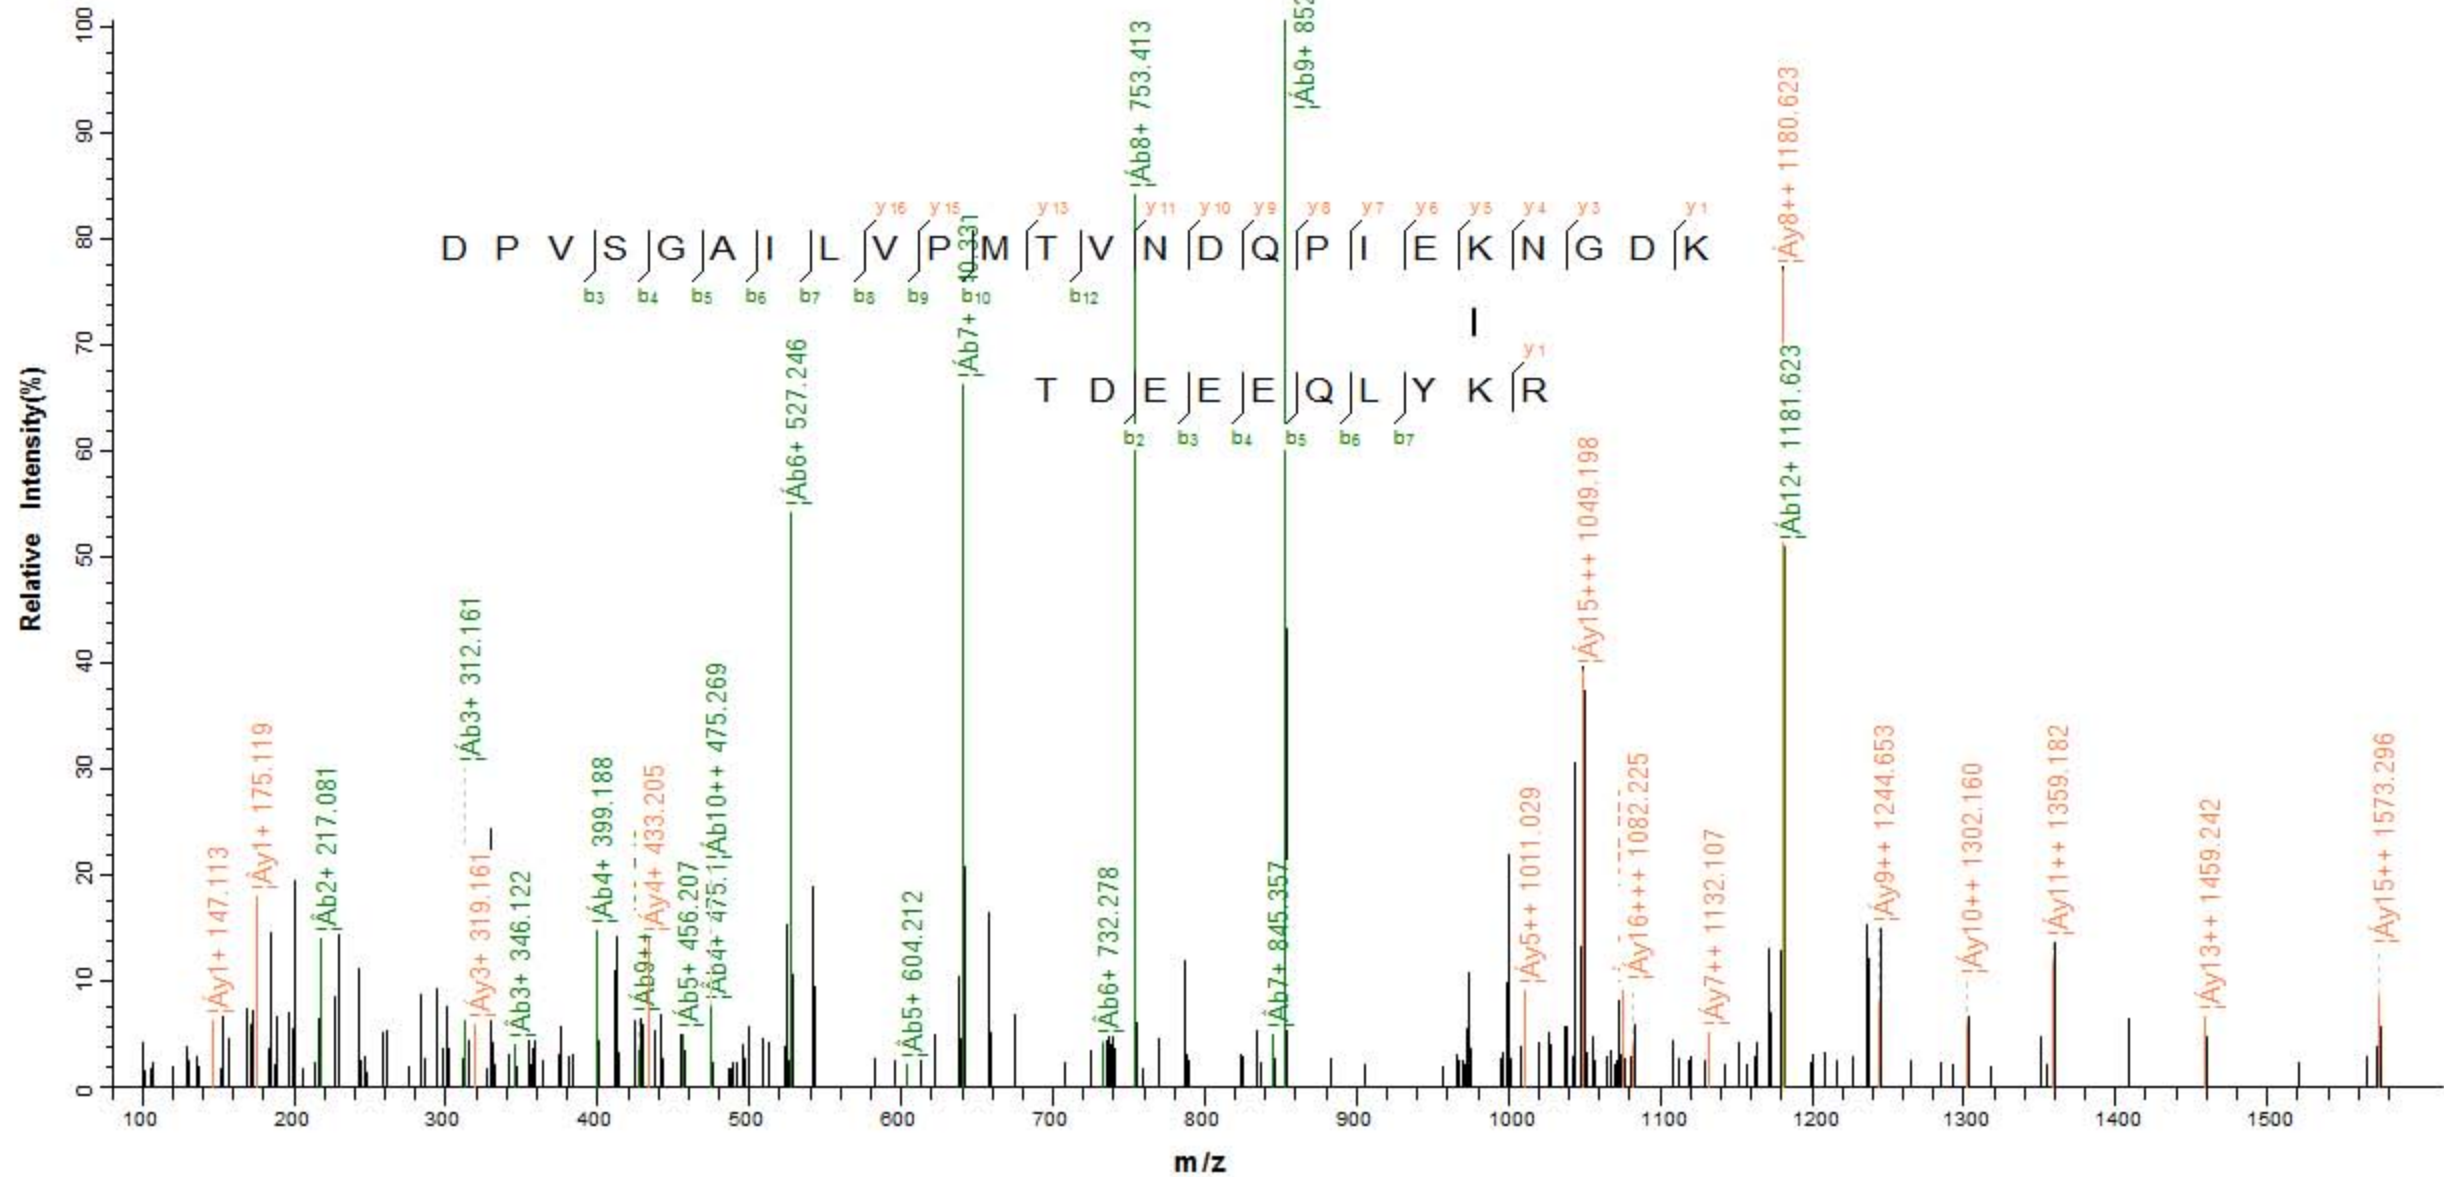

2.4e+004

Relative Intensity(%)

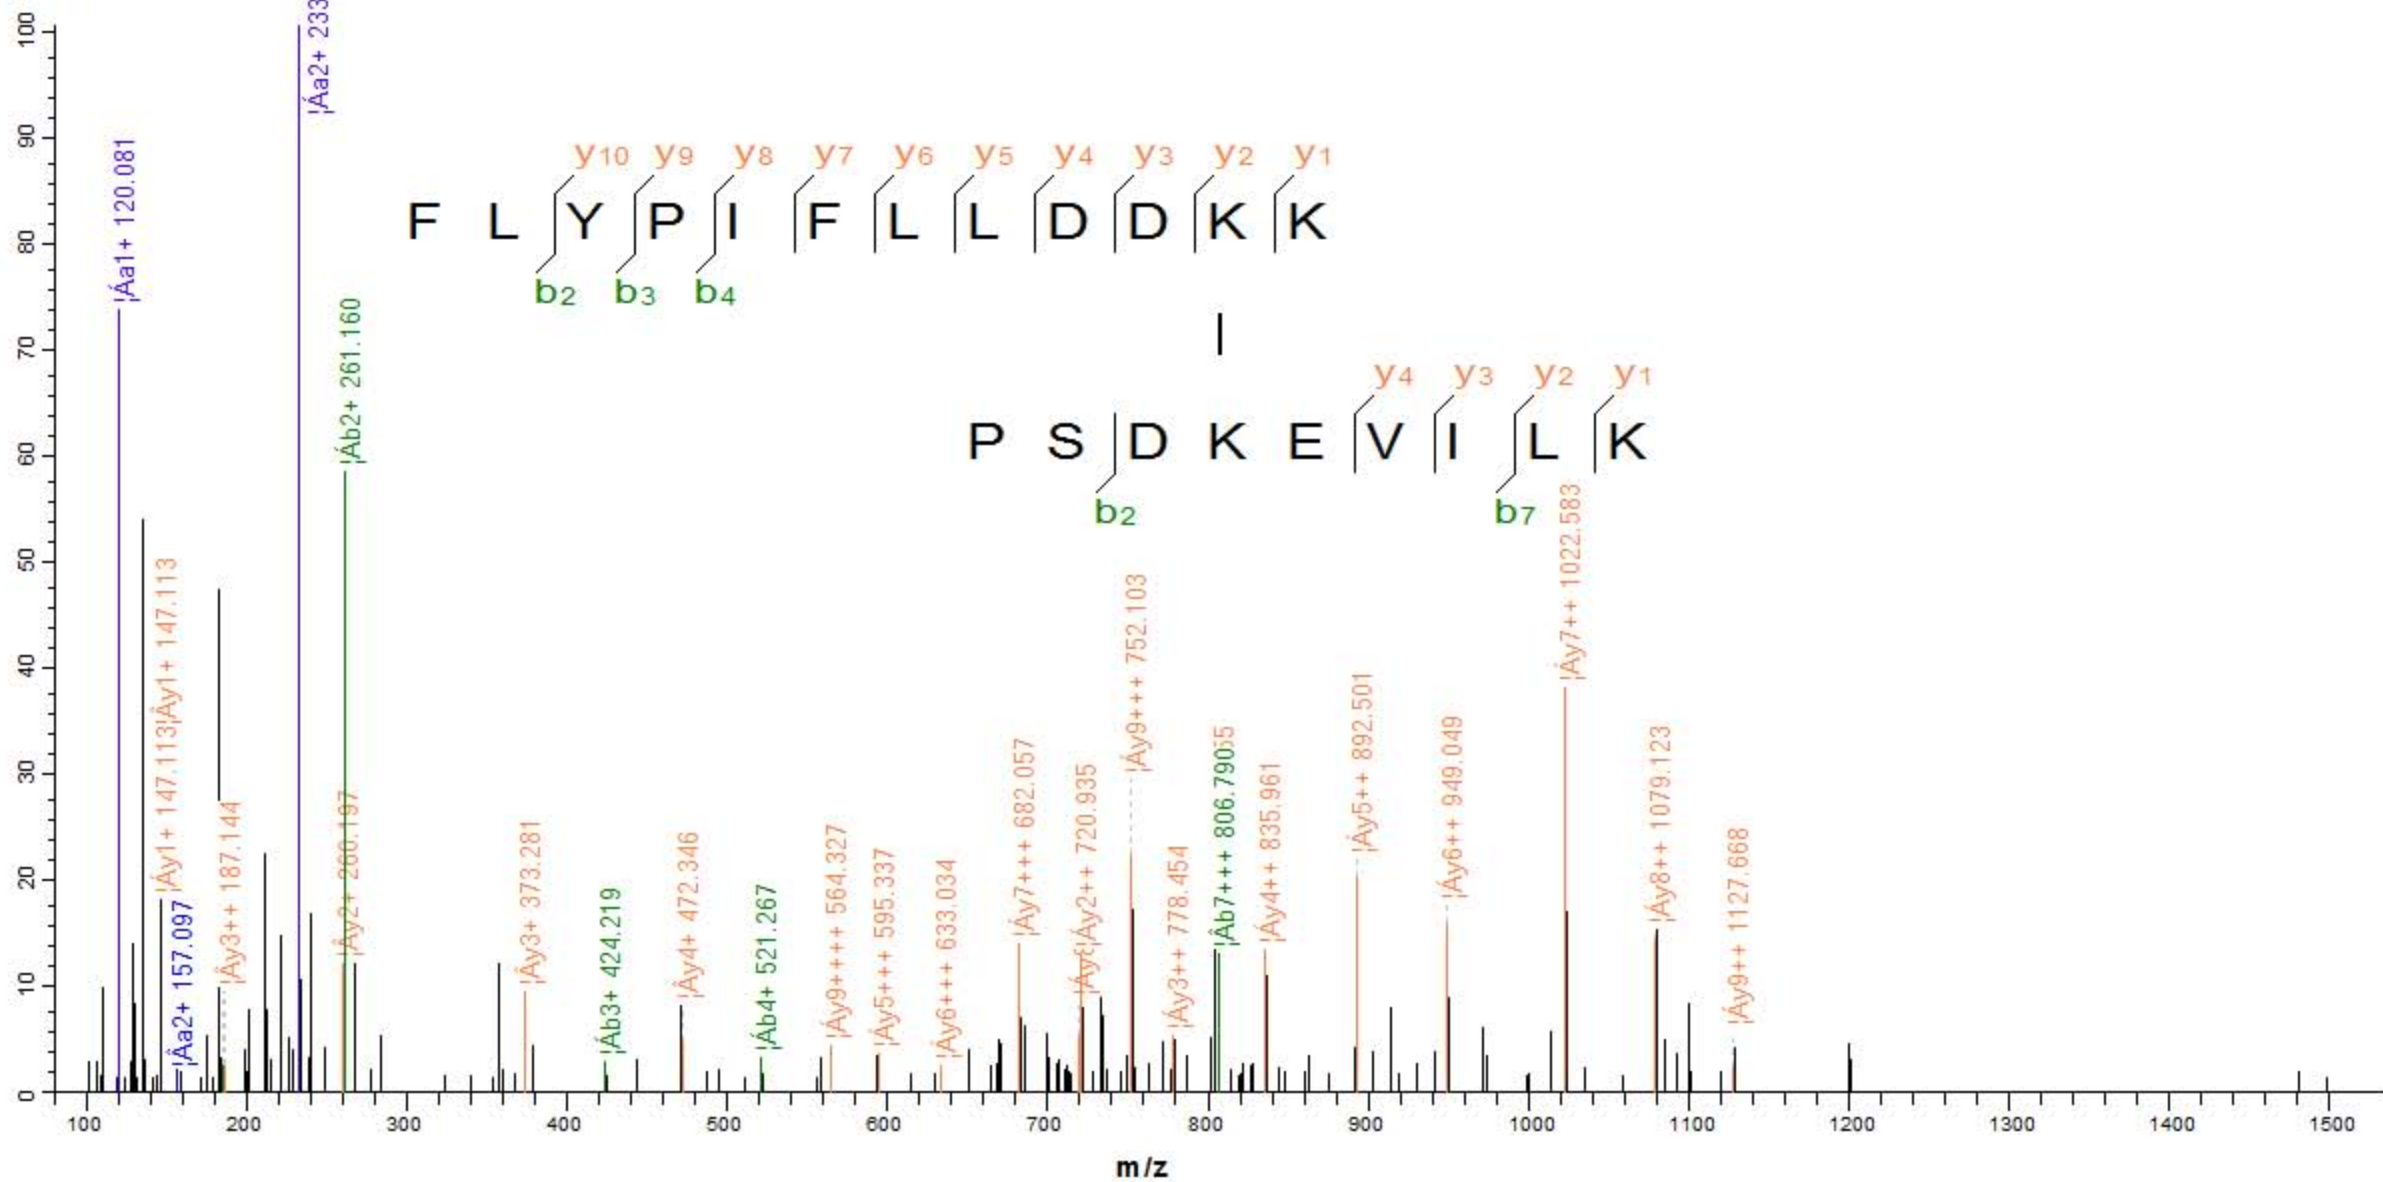

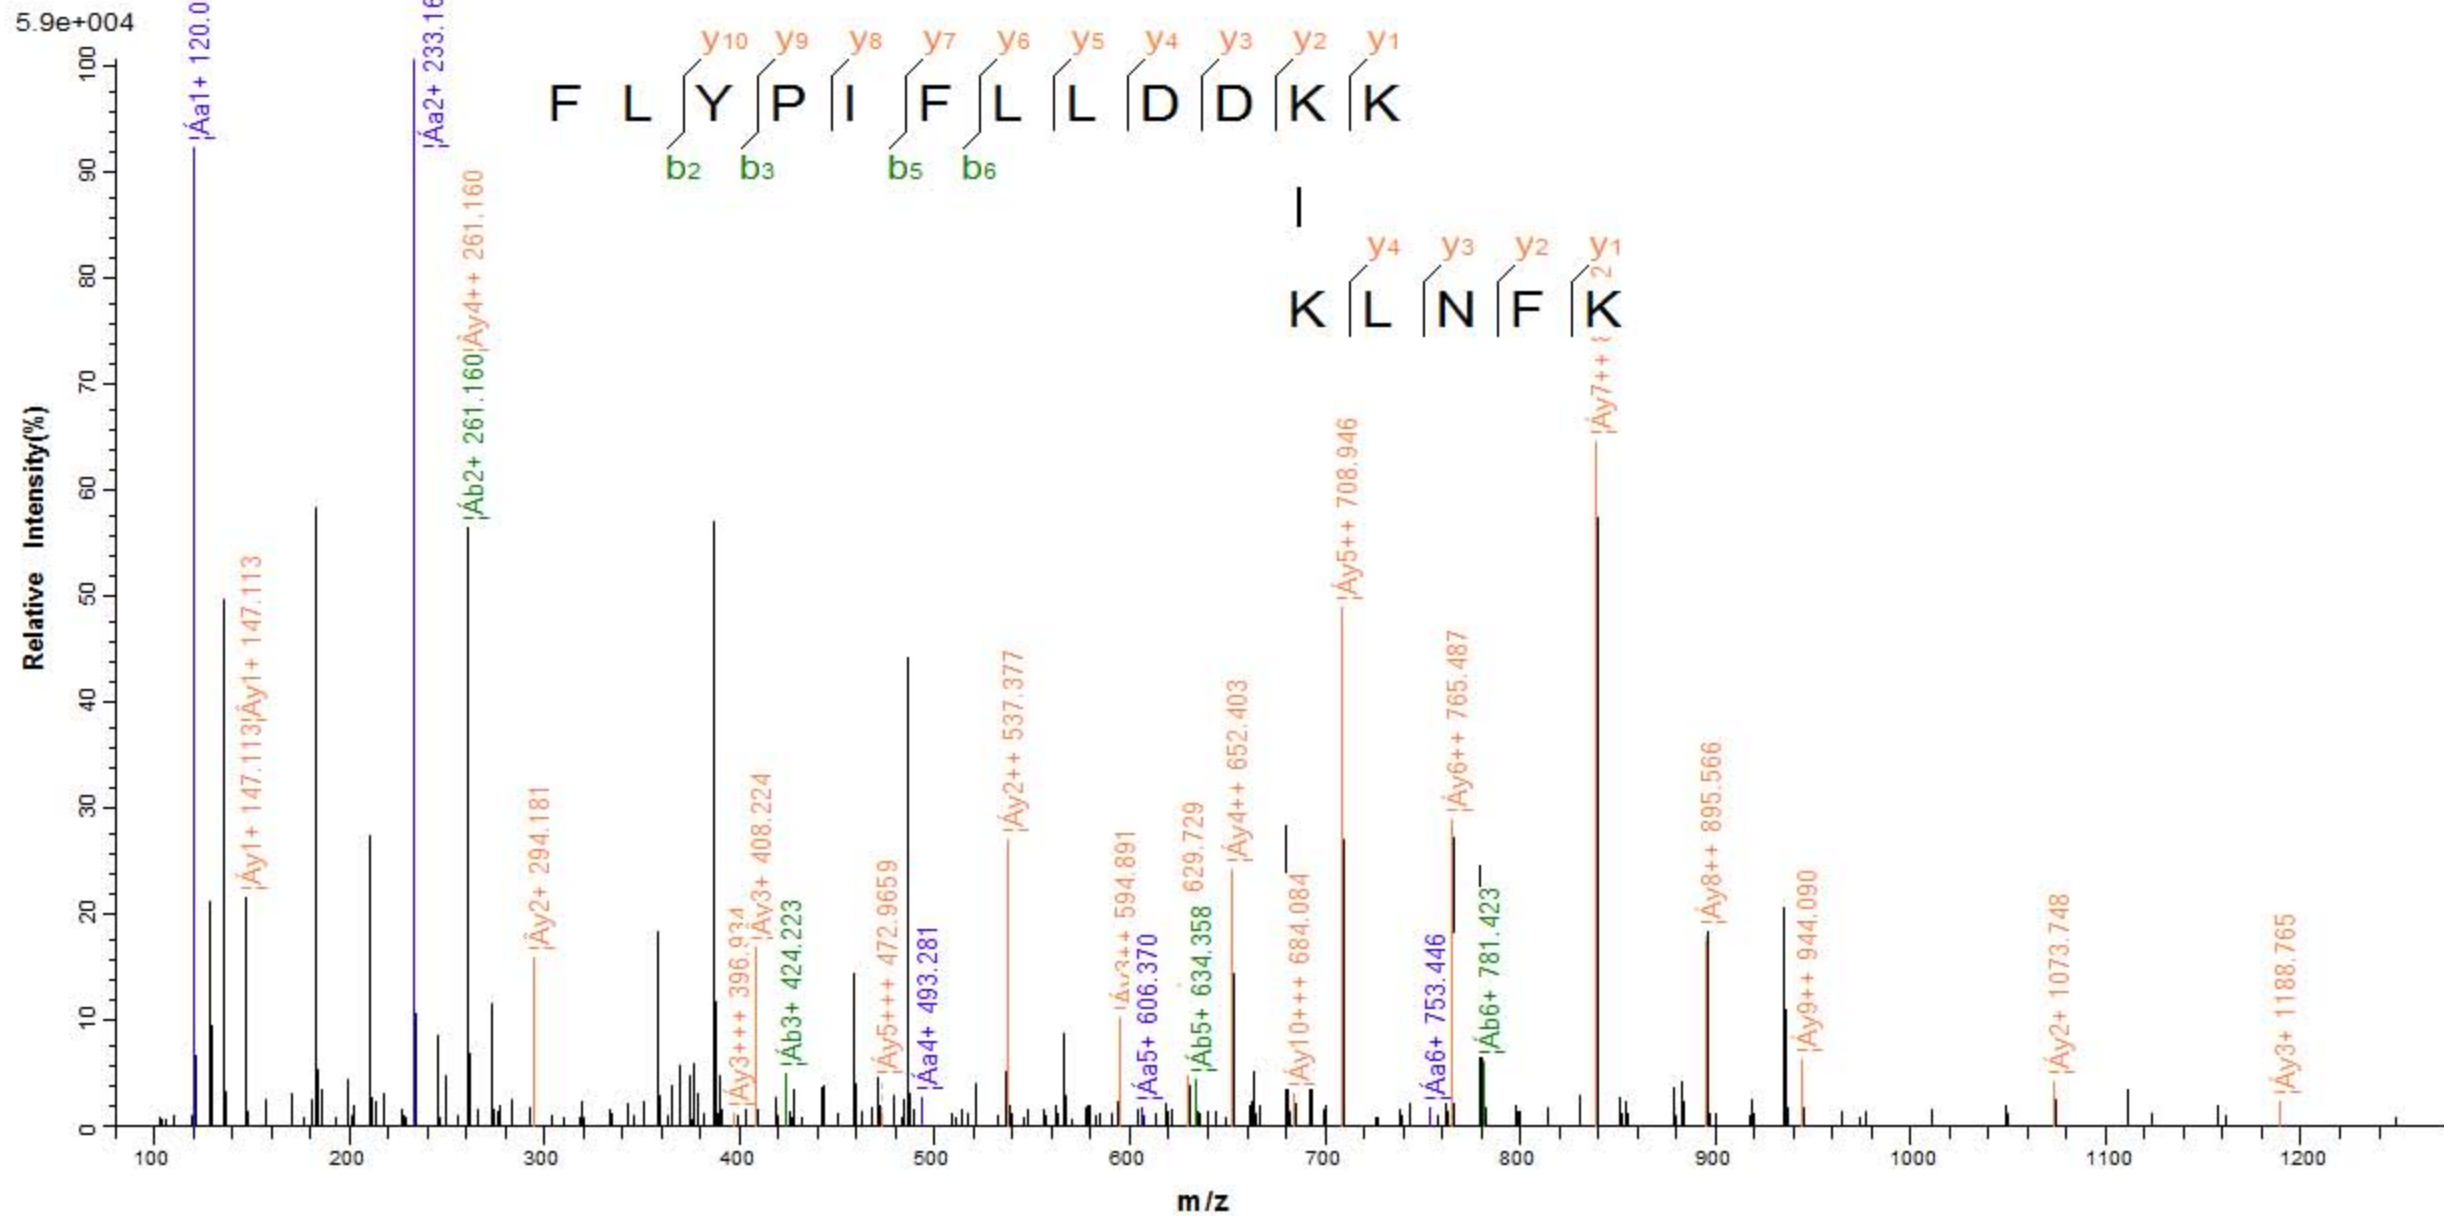

1.5e+004

Relative Intensity(%)

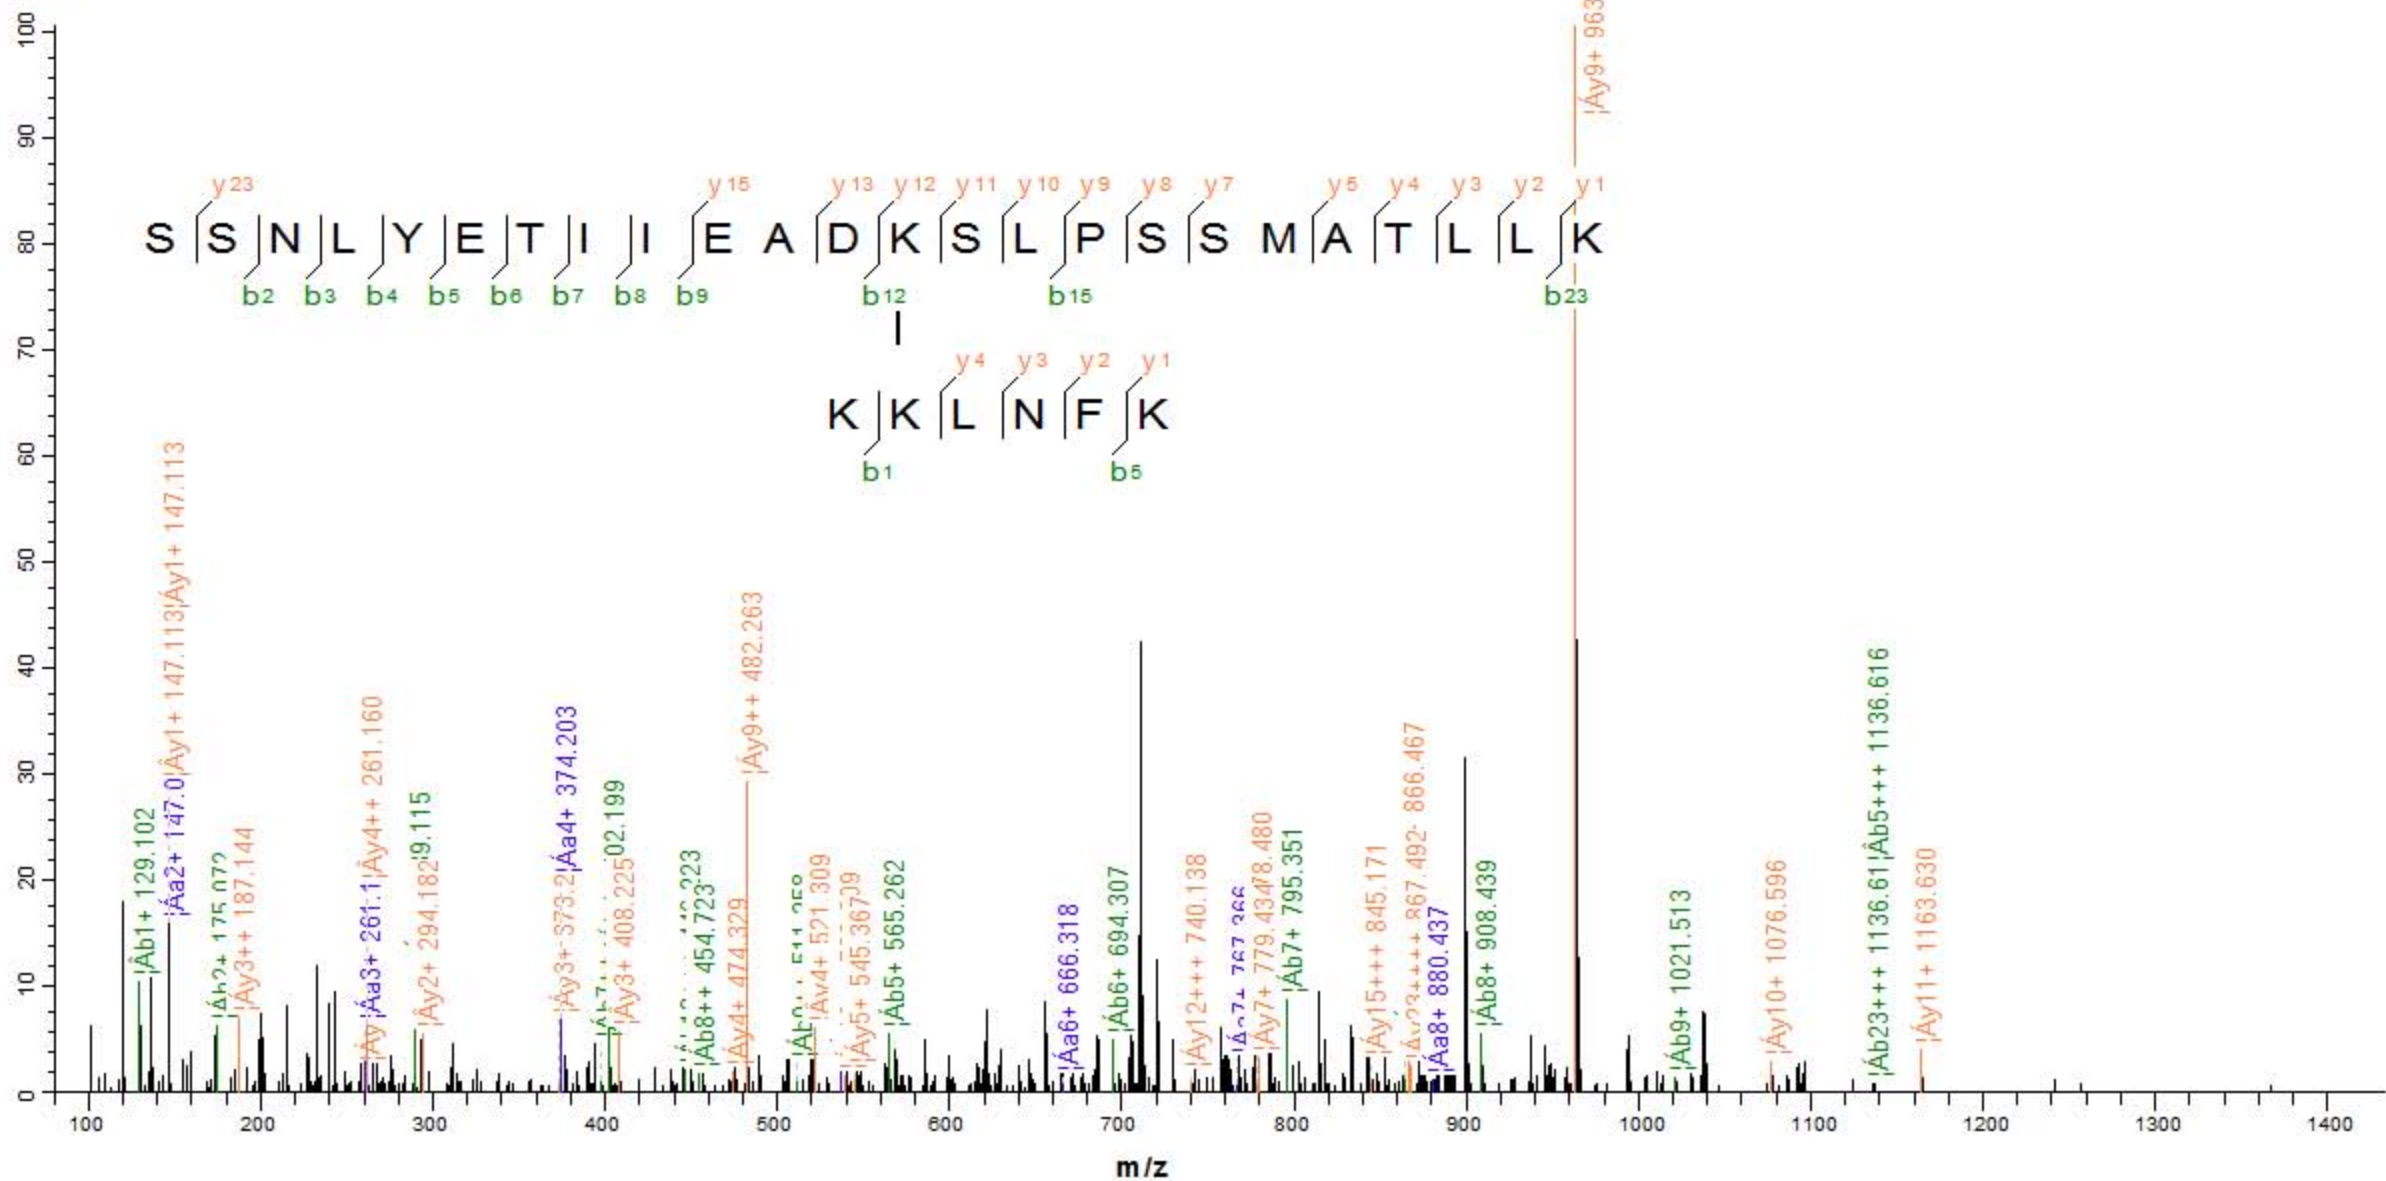



1.4e+005

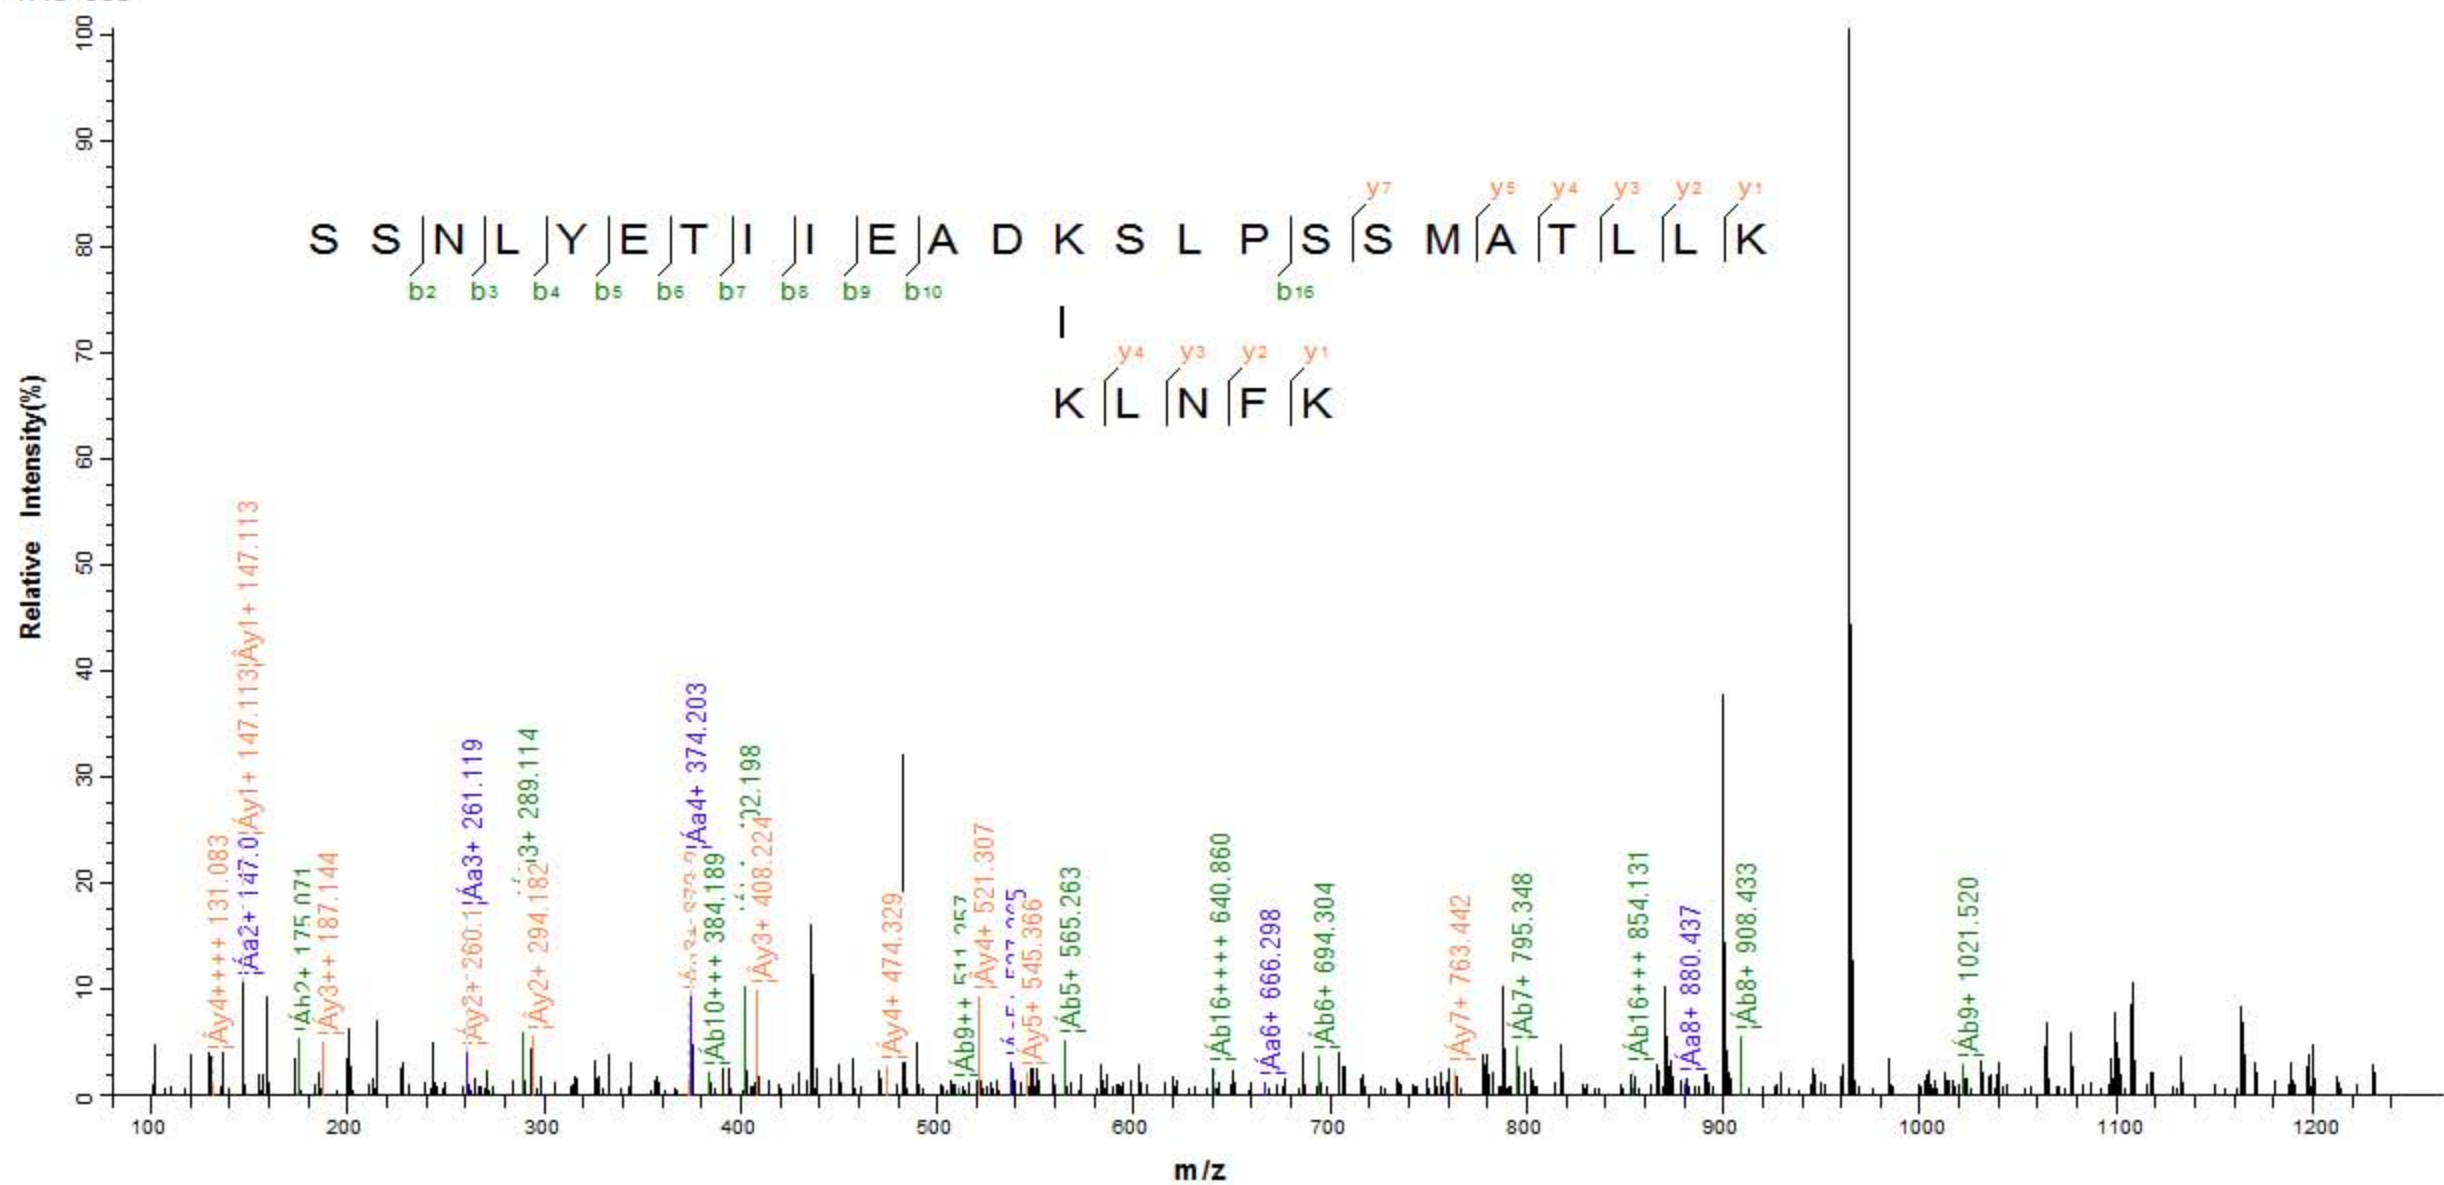

2.2e+004

Relative Intensity(%)

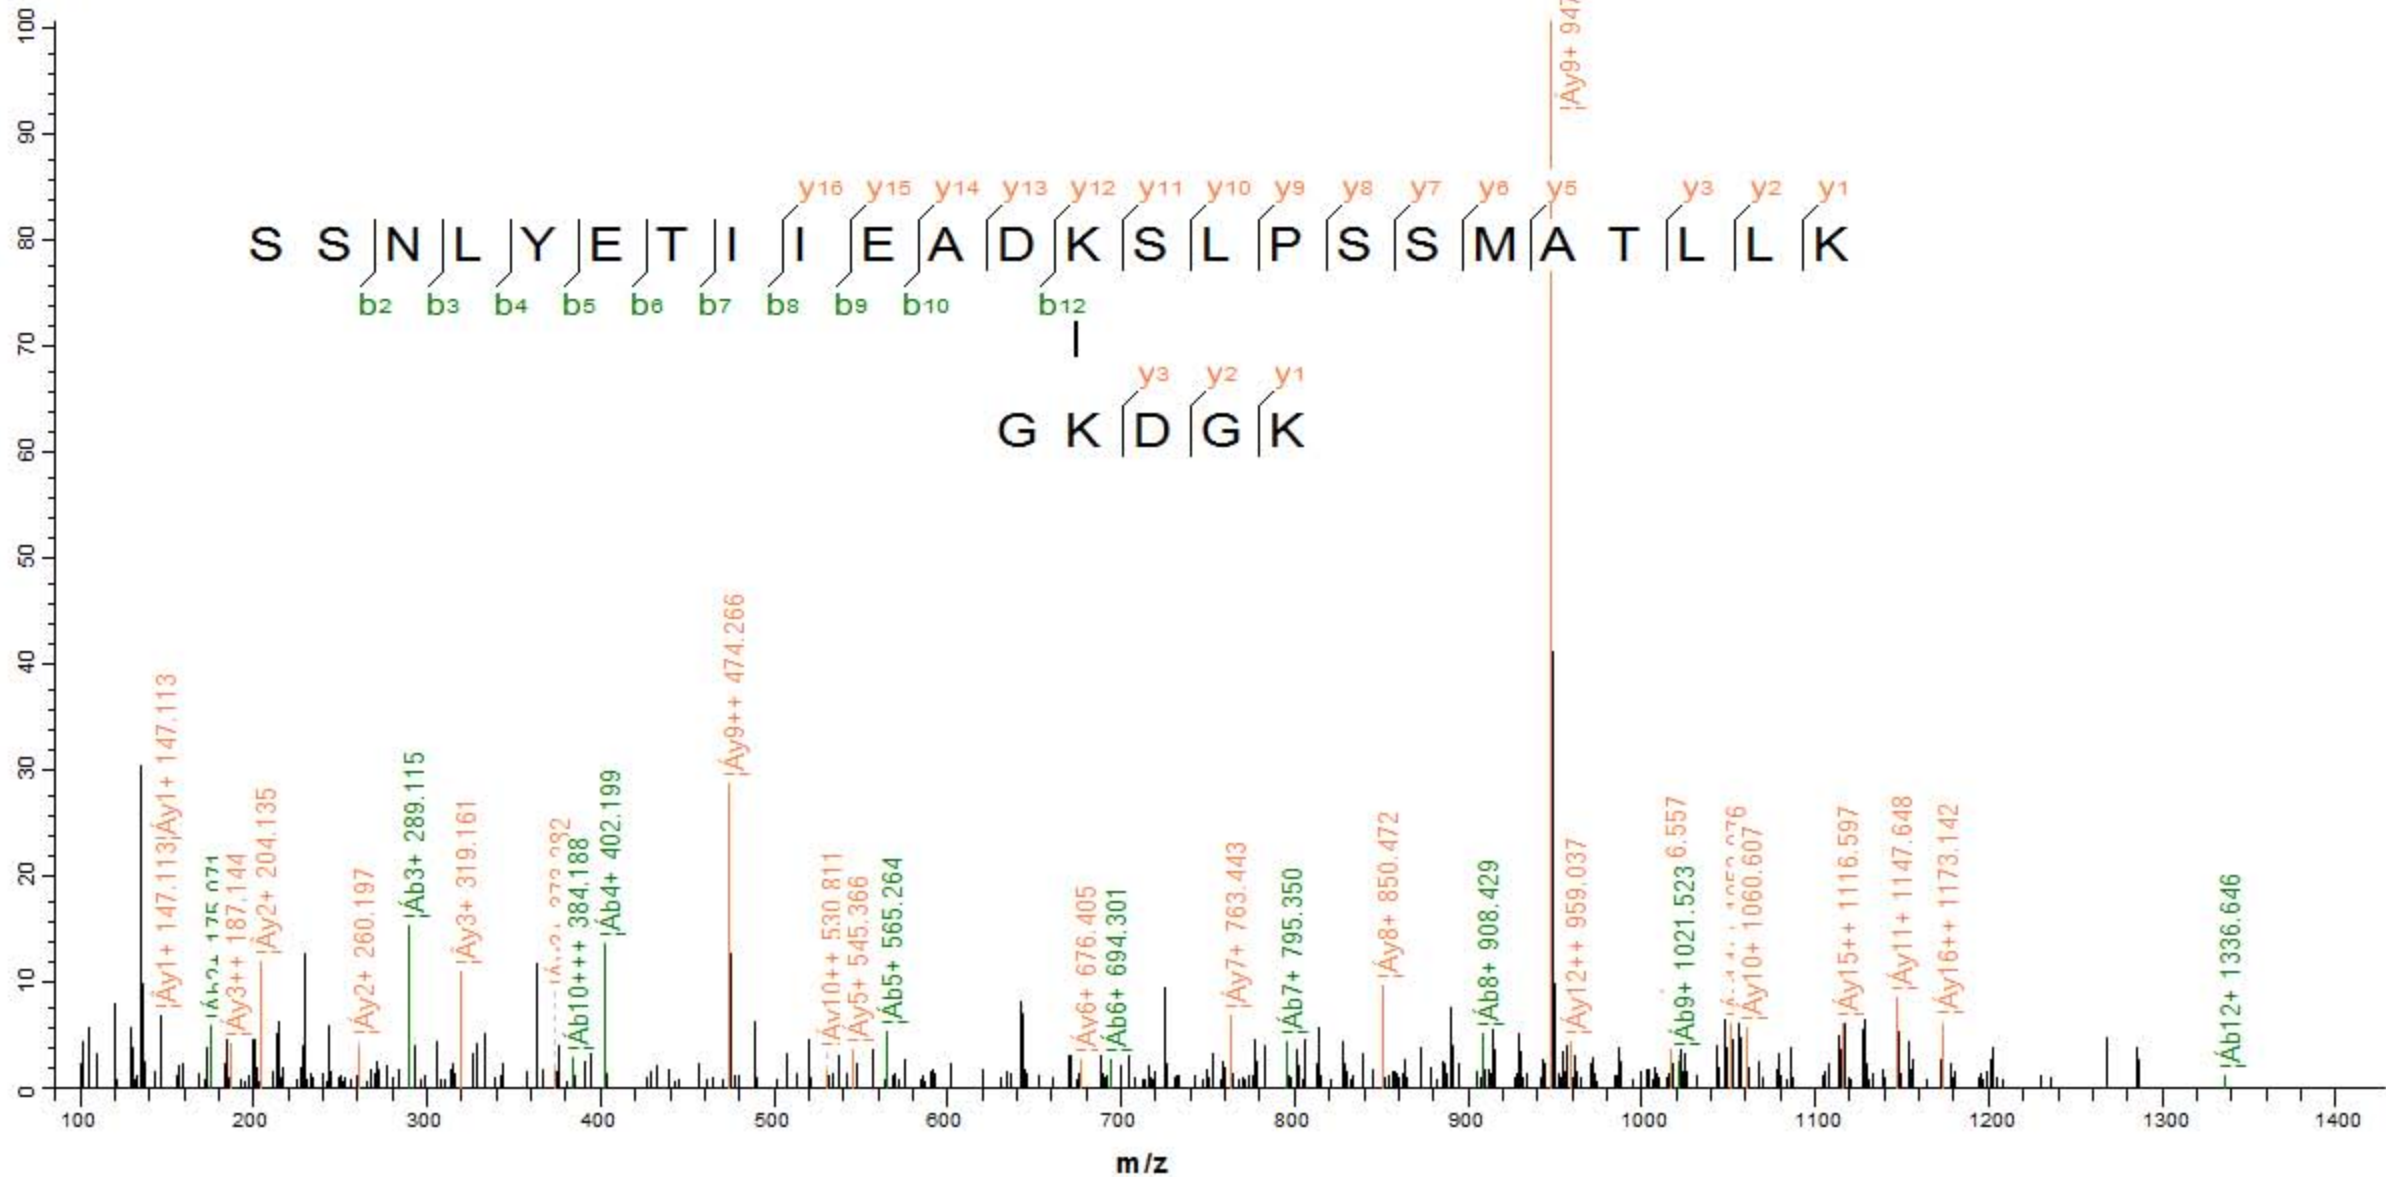

1.3e+004

Relative Intensity(%)

100  
90  
80  
70  
60  
50  
40  
30  
20  
10  
0

100 200 300 400 500 600 700 800 900 1000 1100

m/z

S L P S S M A T L L K N L R

b<sub>2</sub> b<sub>5</sub> b<sub>6</sub> b<sub>11</sub>

y<sub>12</sub> y<sub>11</sub> y<sub>10</sub> y<sub>9</sub> y<sub>8</sub> y<sub>7</sub> y<sub>6</sub> y<sub>5</sub> y<sub>4</sub> y<sub>3</sub> y<sub>2</sub> y<sub>1</sub>

K K L N F K

b<sub>2</sub> y<sub>5</sub> y<sub>4</sub> y<sub>3</sub> y<sub>2</sub> y<sub>1</sub>

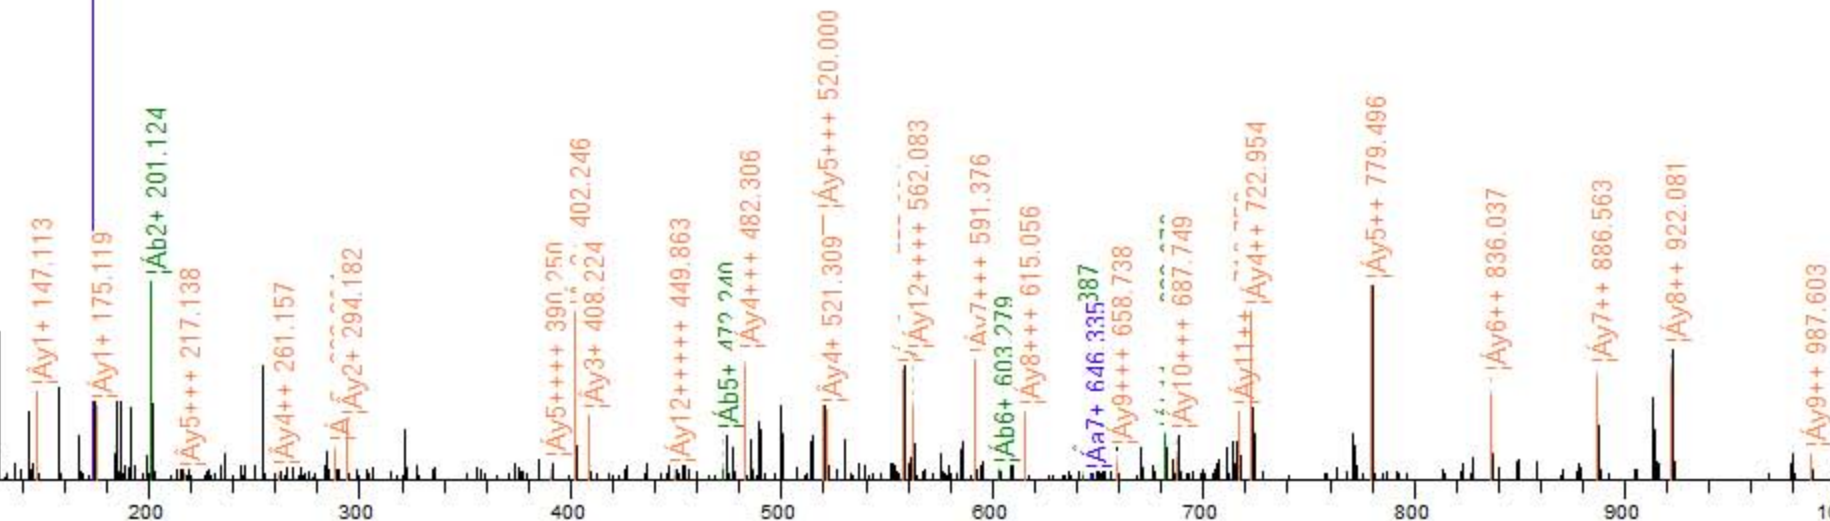

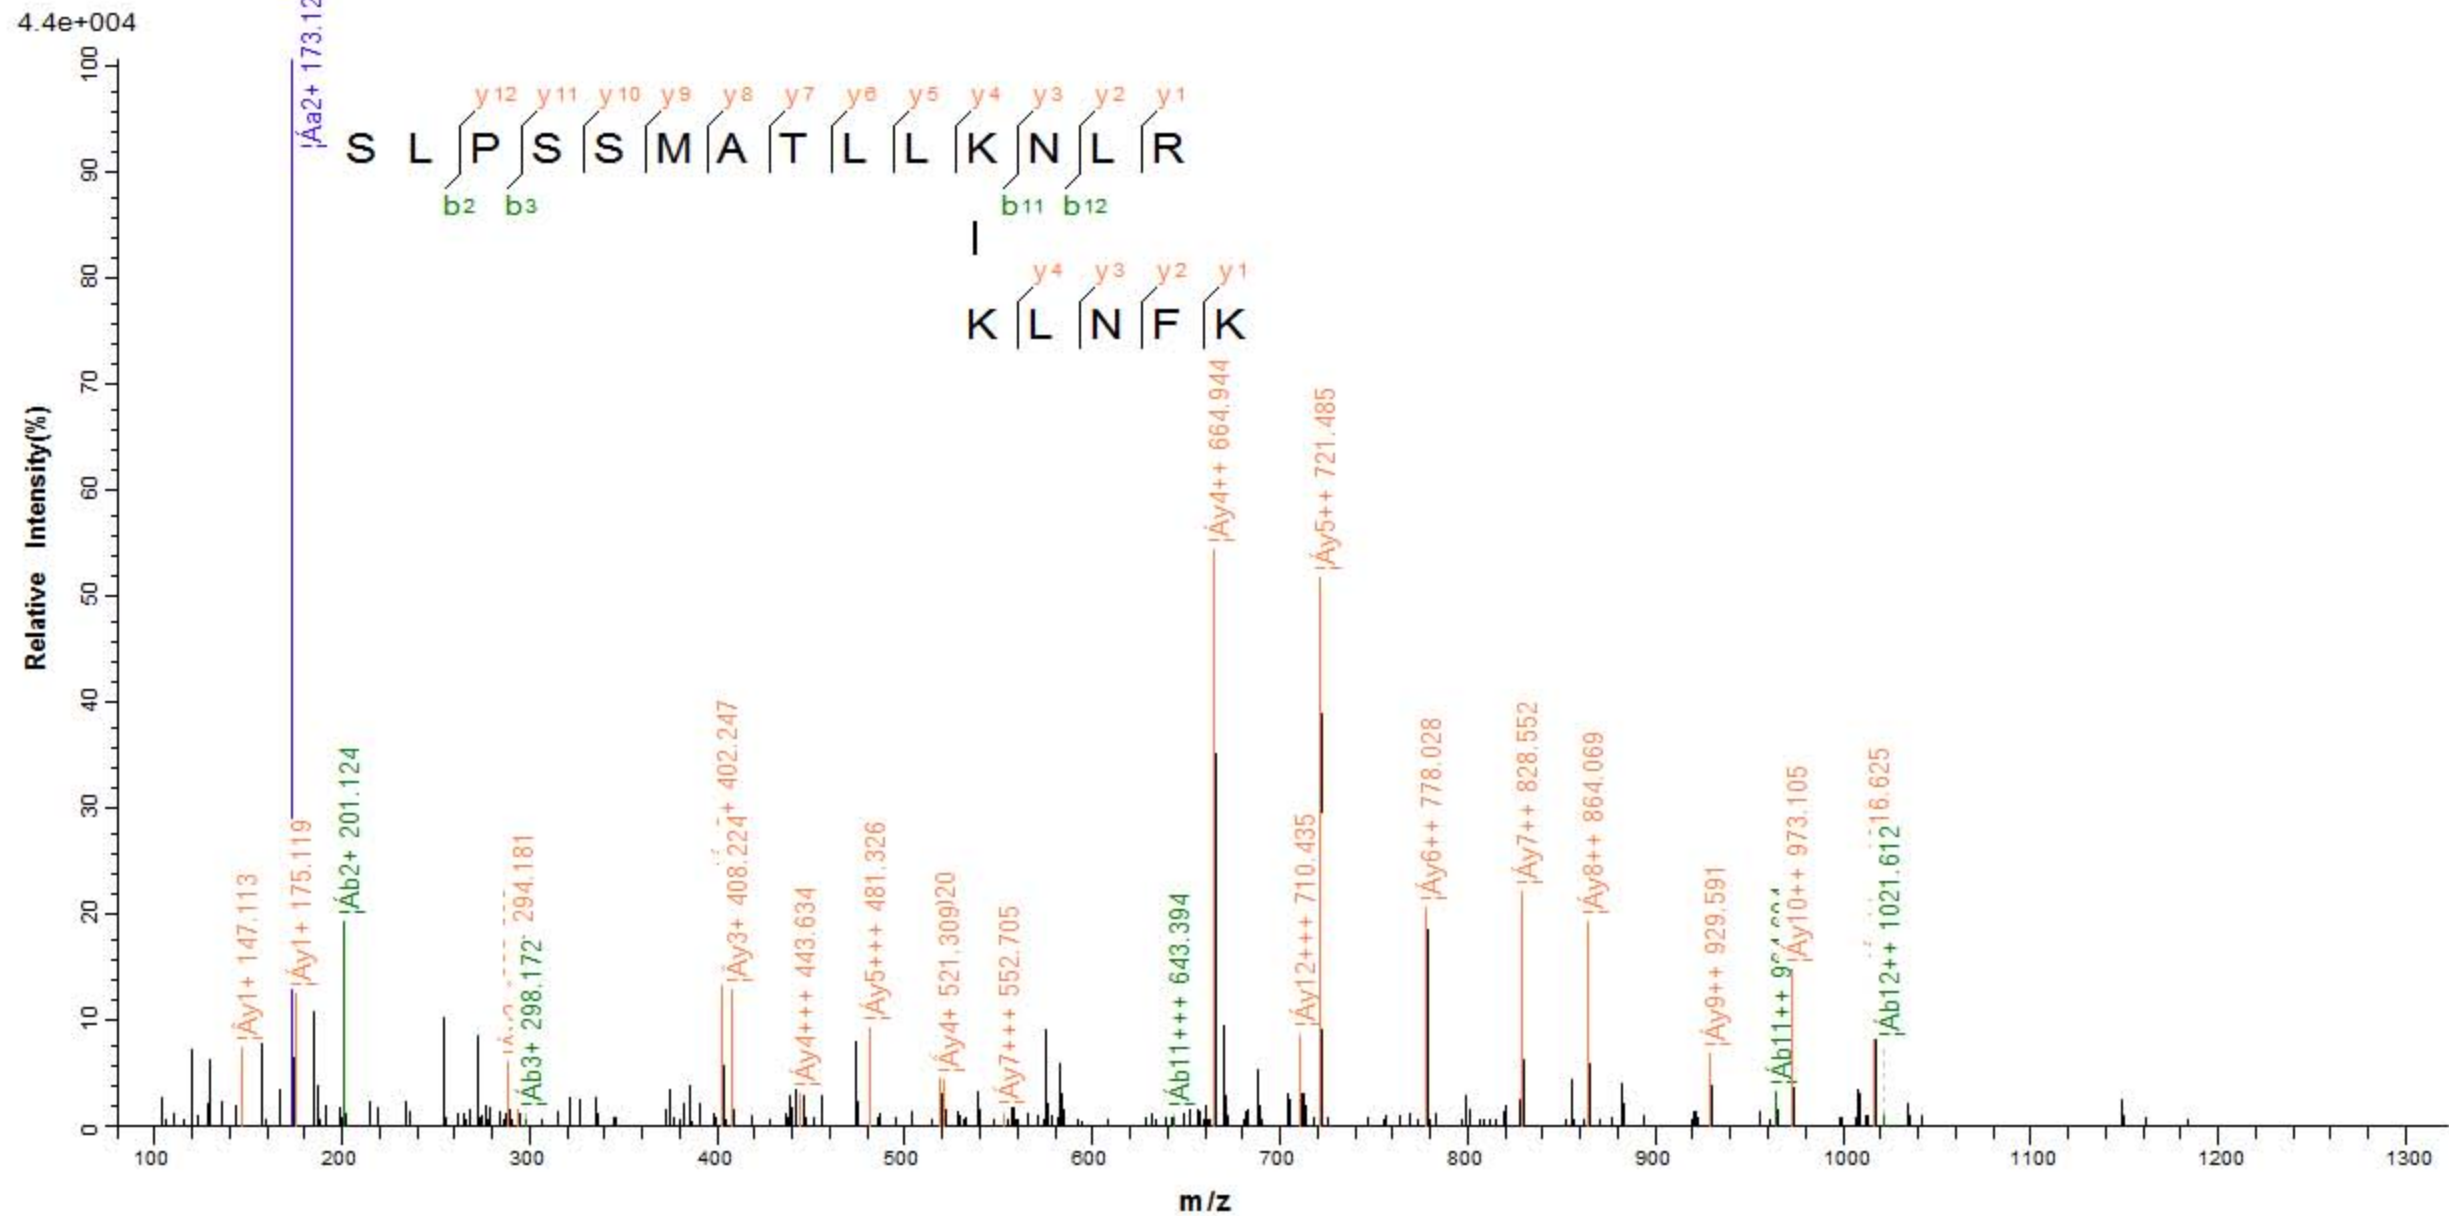

1.6e+004

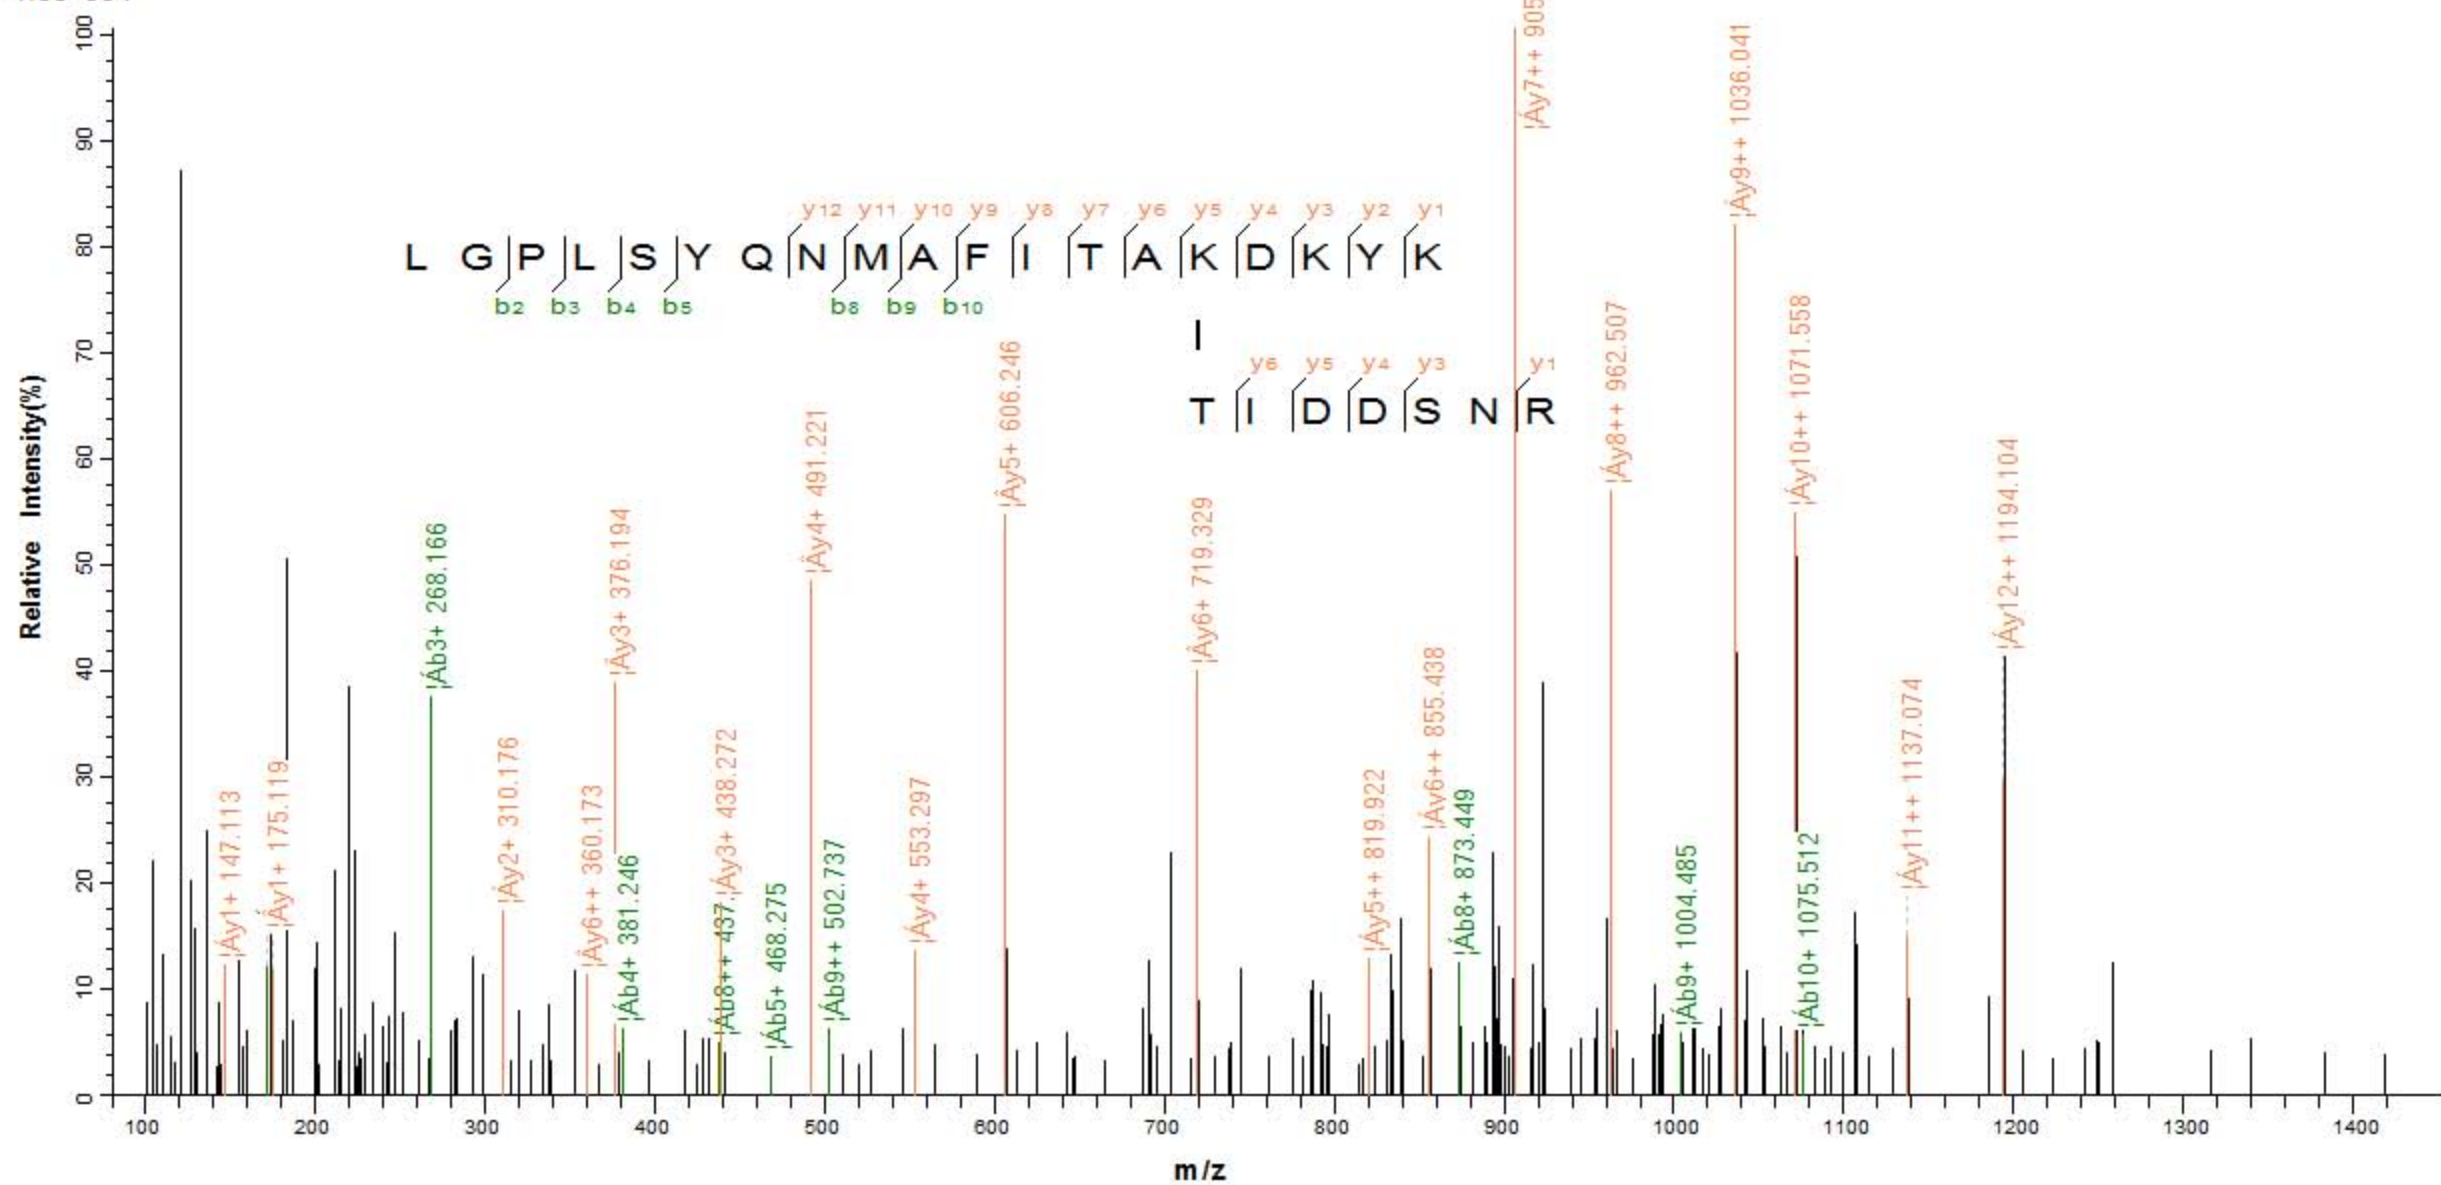

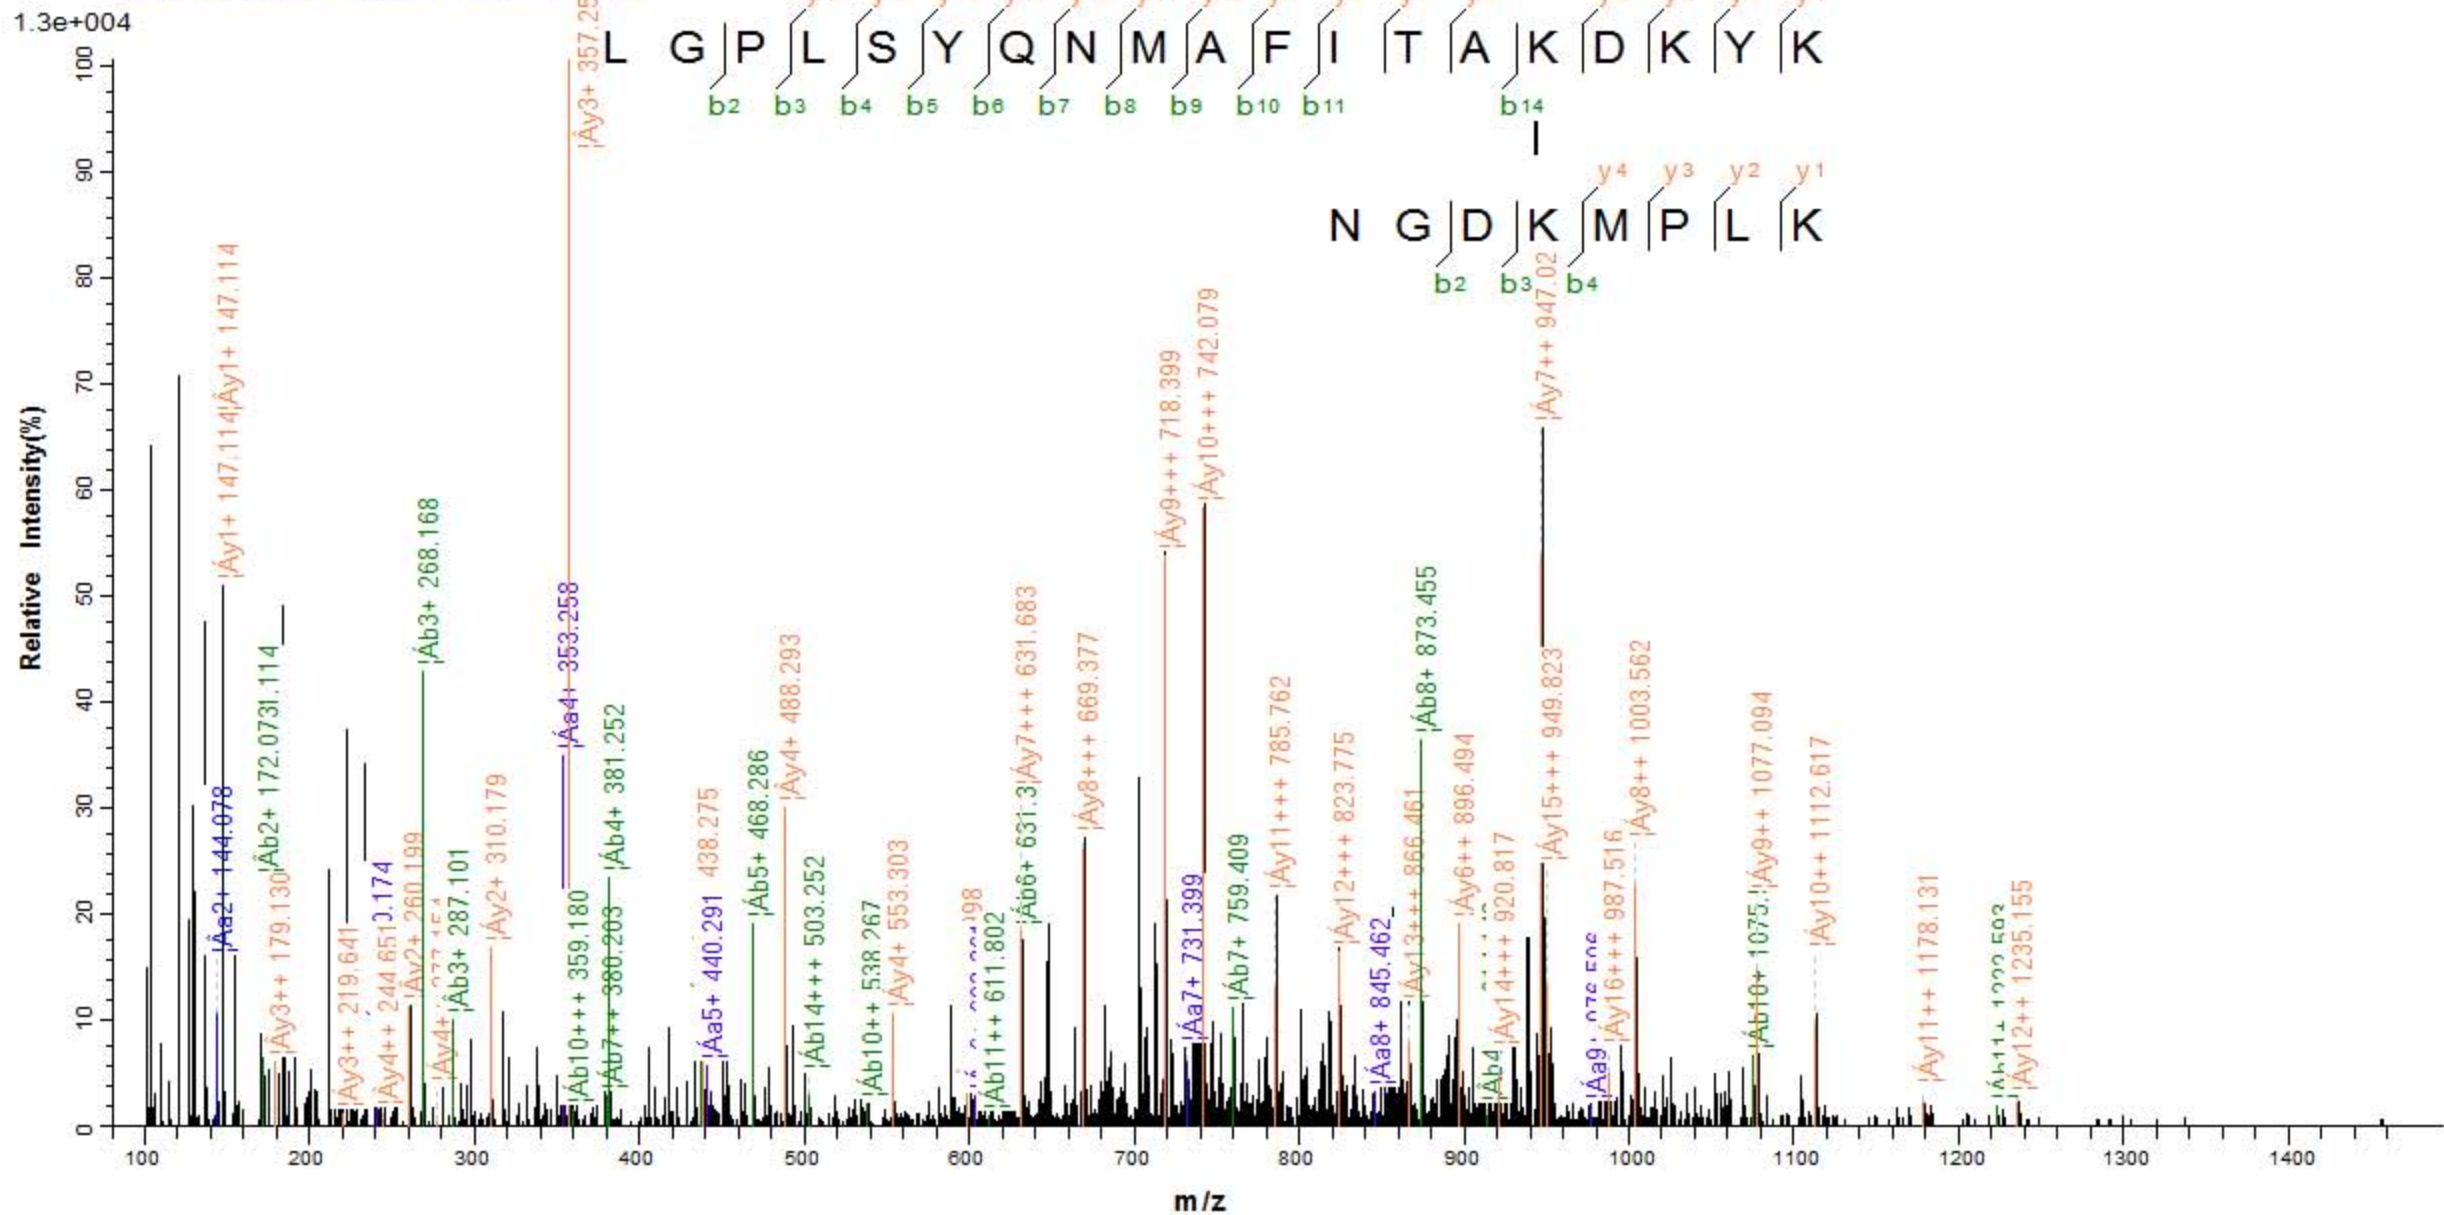

5.1e+004

Relative Intensity(%)

D K Y K L Y P V R  
 b<sub>2</sub> b<sub>3</sub>

T I D D S N R  
 b<sub>1</sub> b<sub>2</sub>

y<sub>5</sub> y<sub>4</sub> y<sub>3</sub> y<sub>2</sub> y<sub>1</sub>  
 y<sub>6</sub> y<sub>5</sub> y<sub>4</sub> y<sub>3</sub> y<sub>2</sub> y<sub>1</sub>

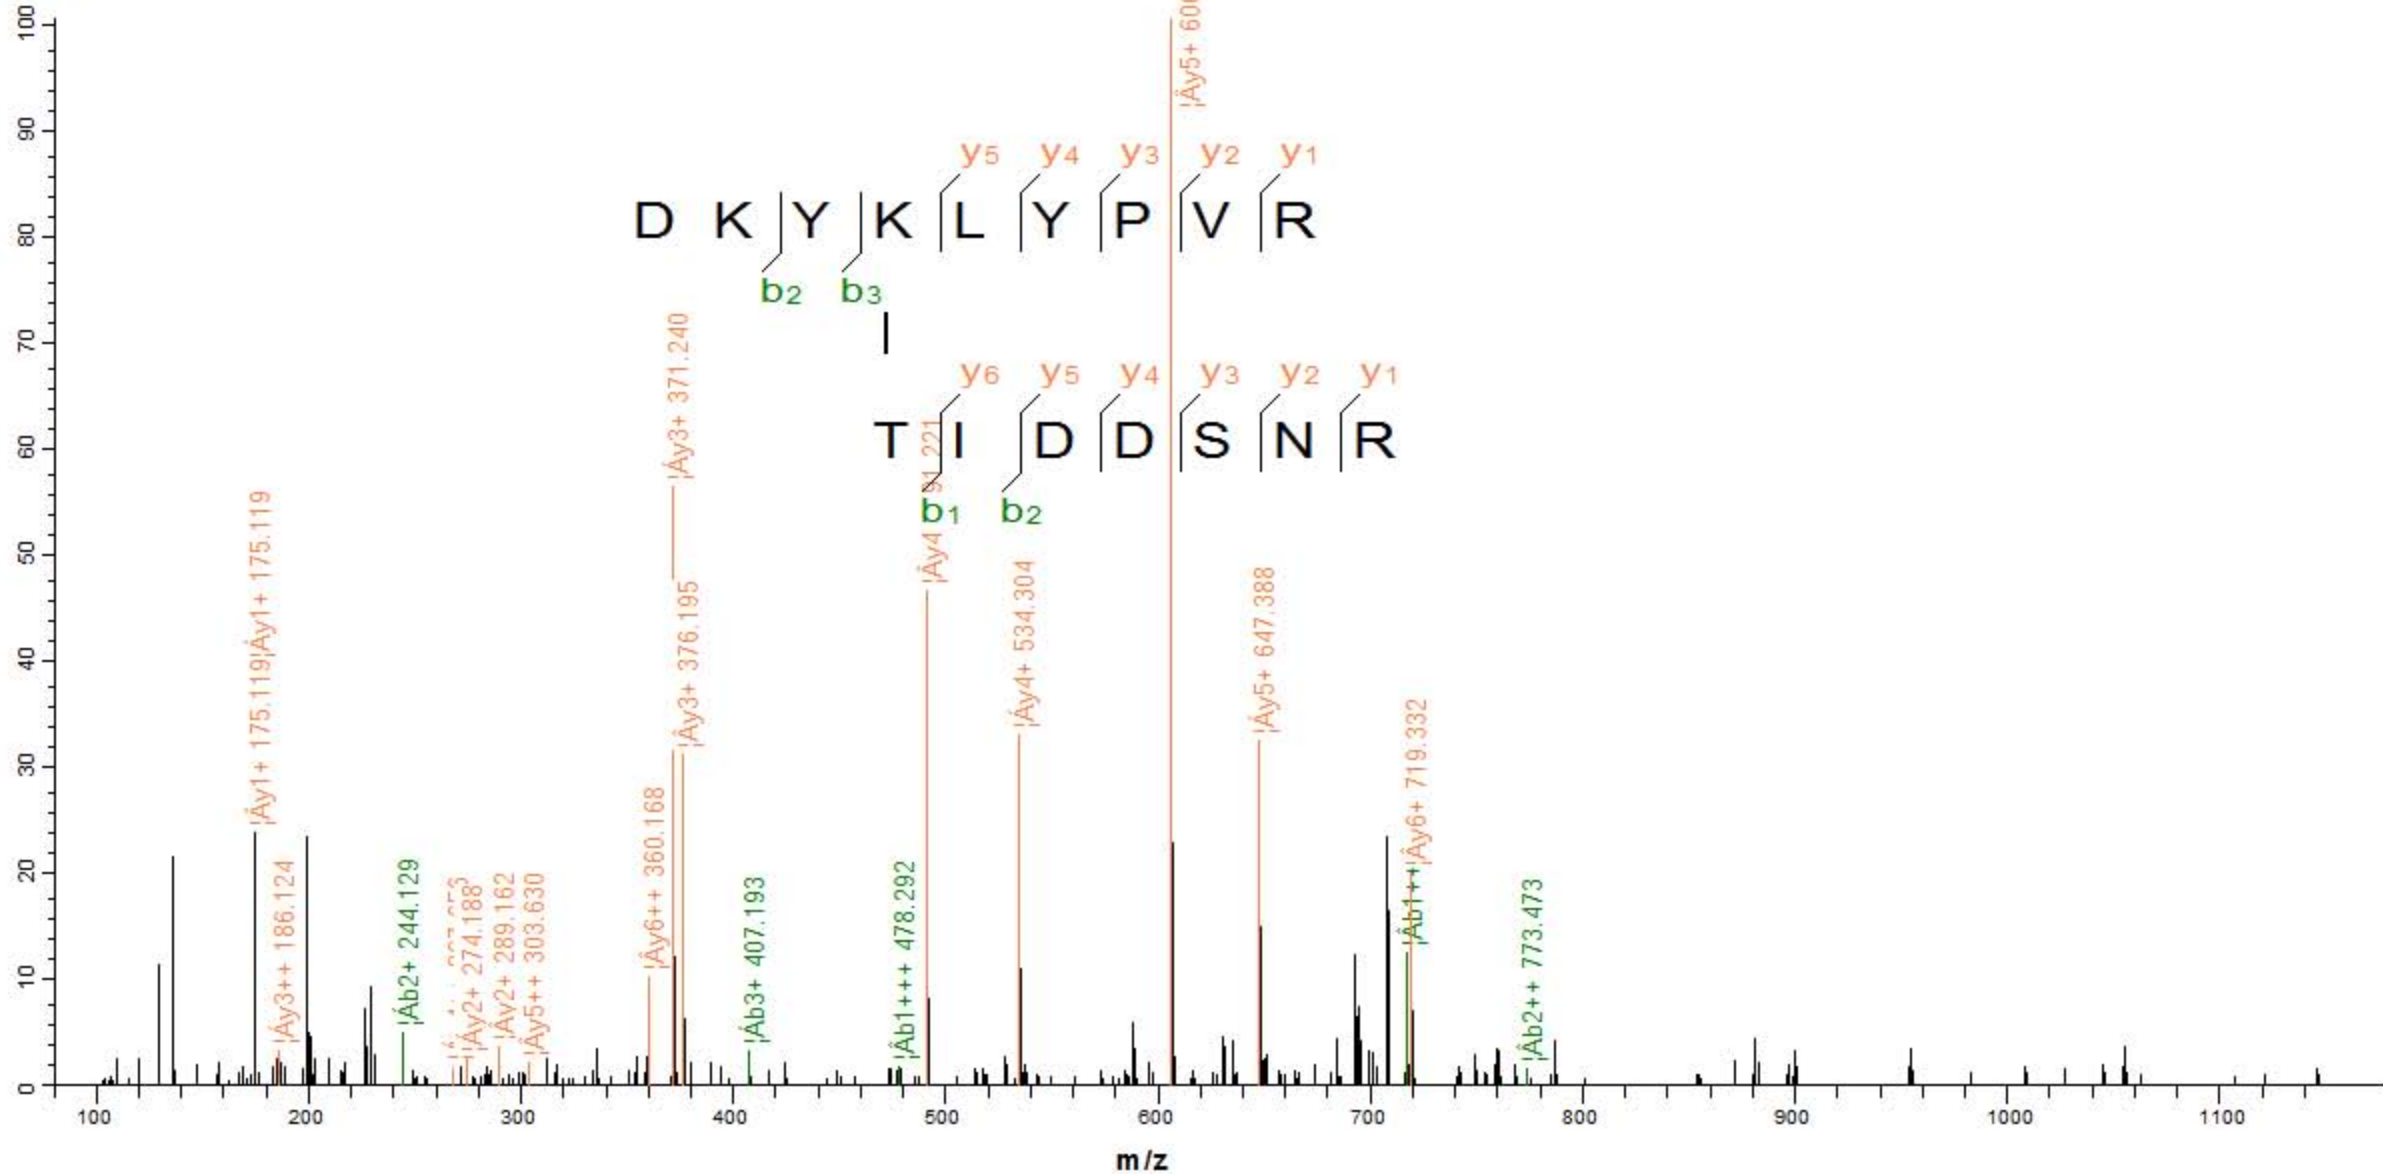

2.7e+004

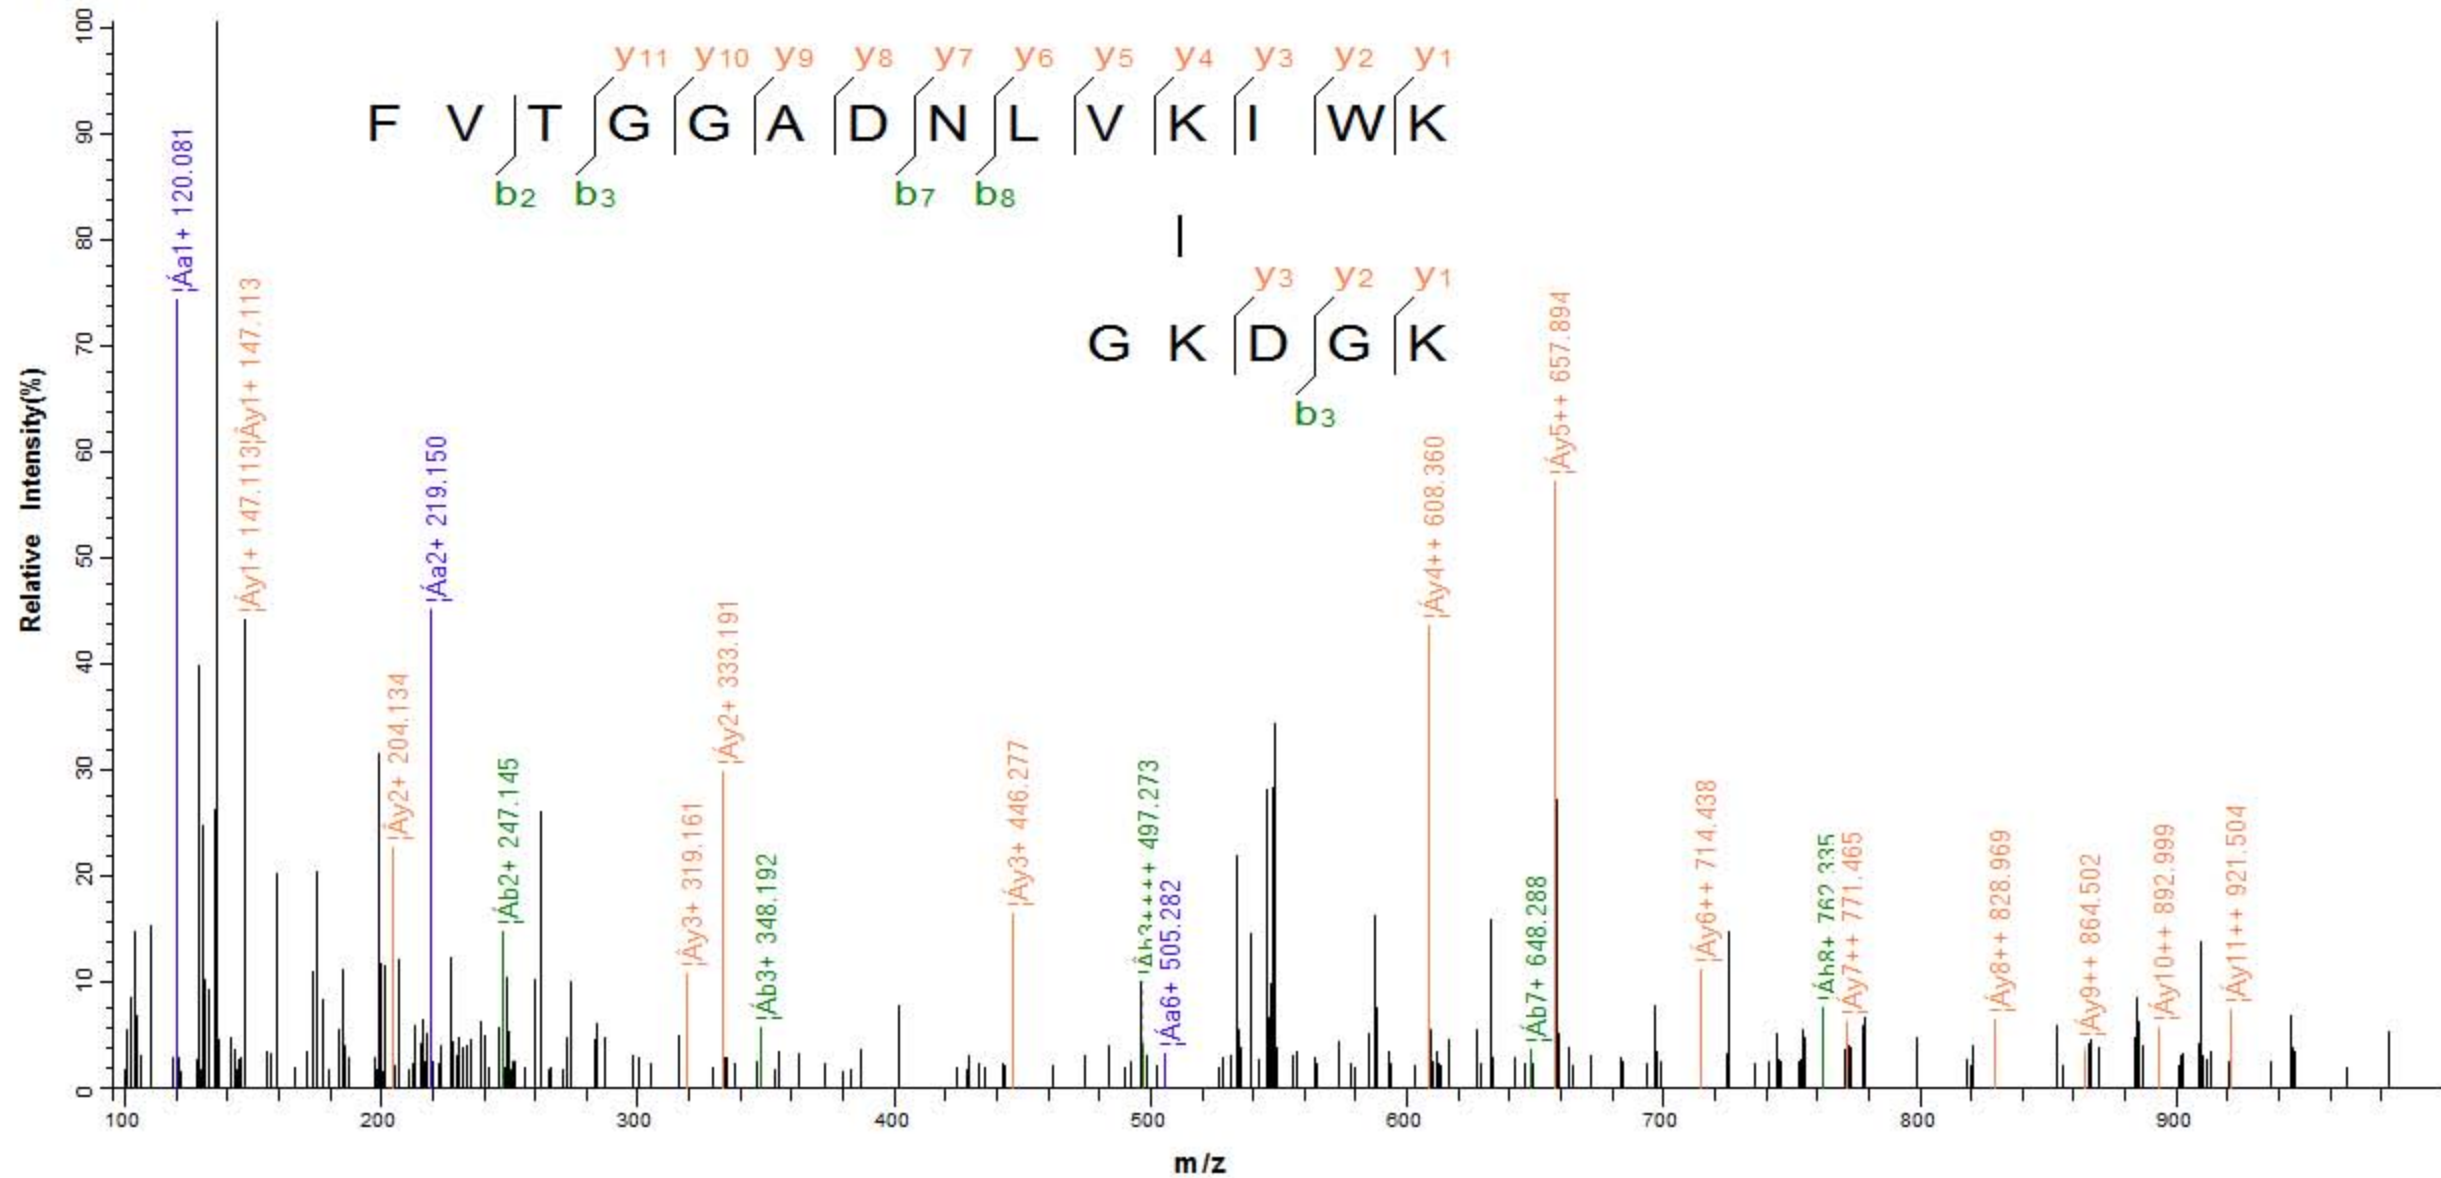



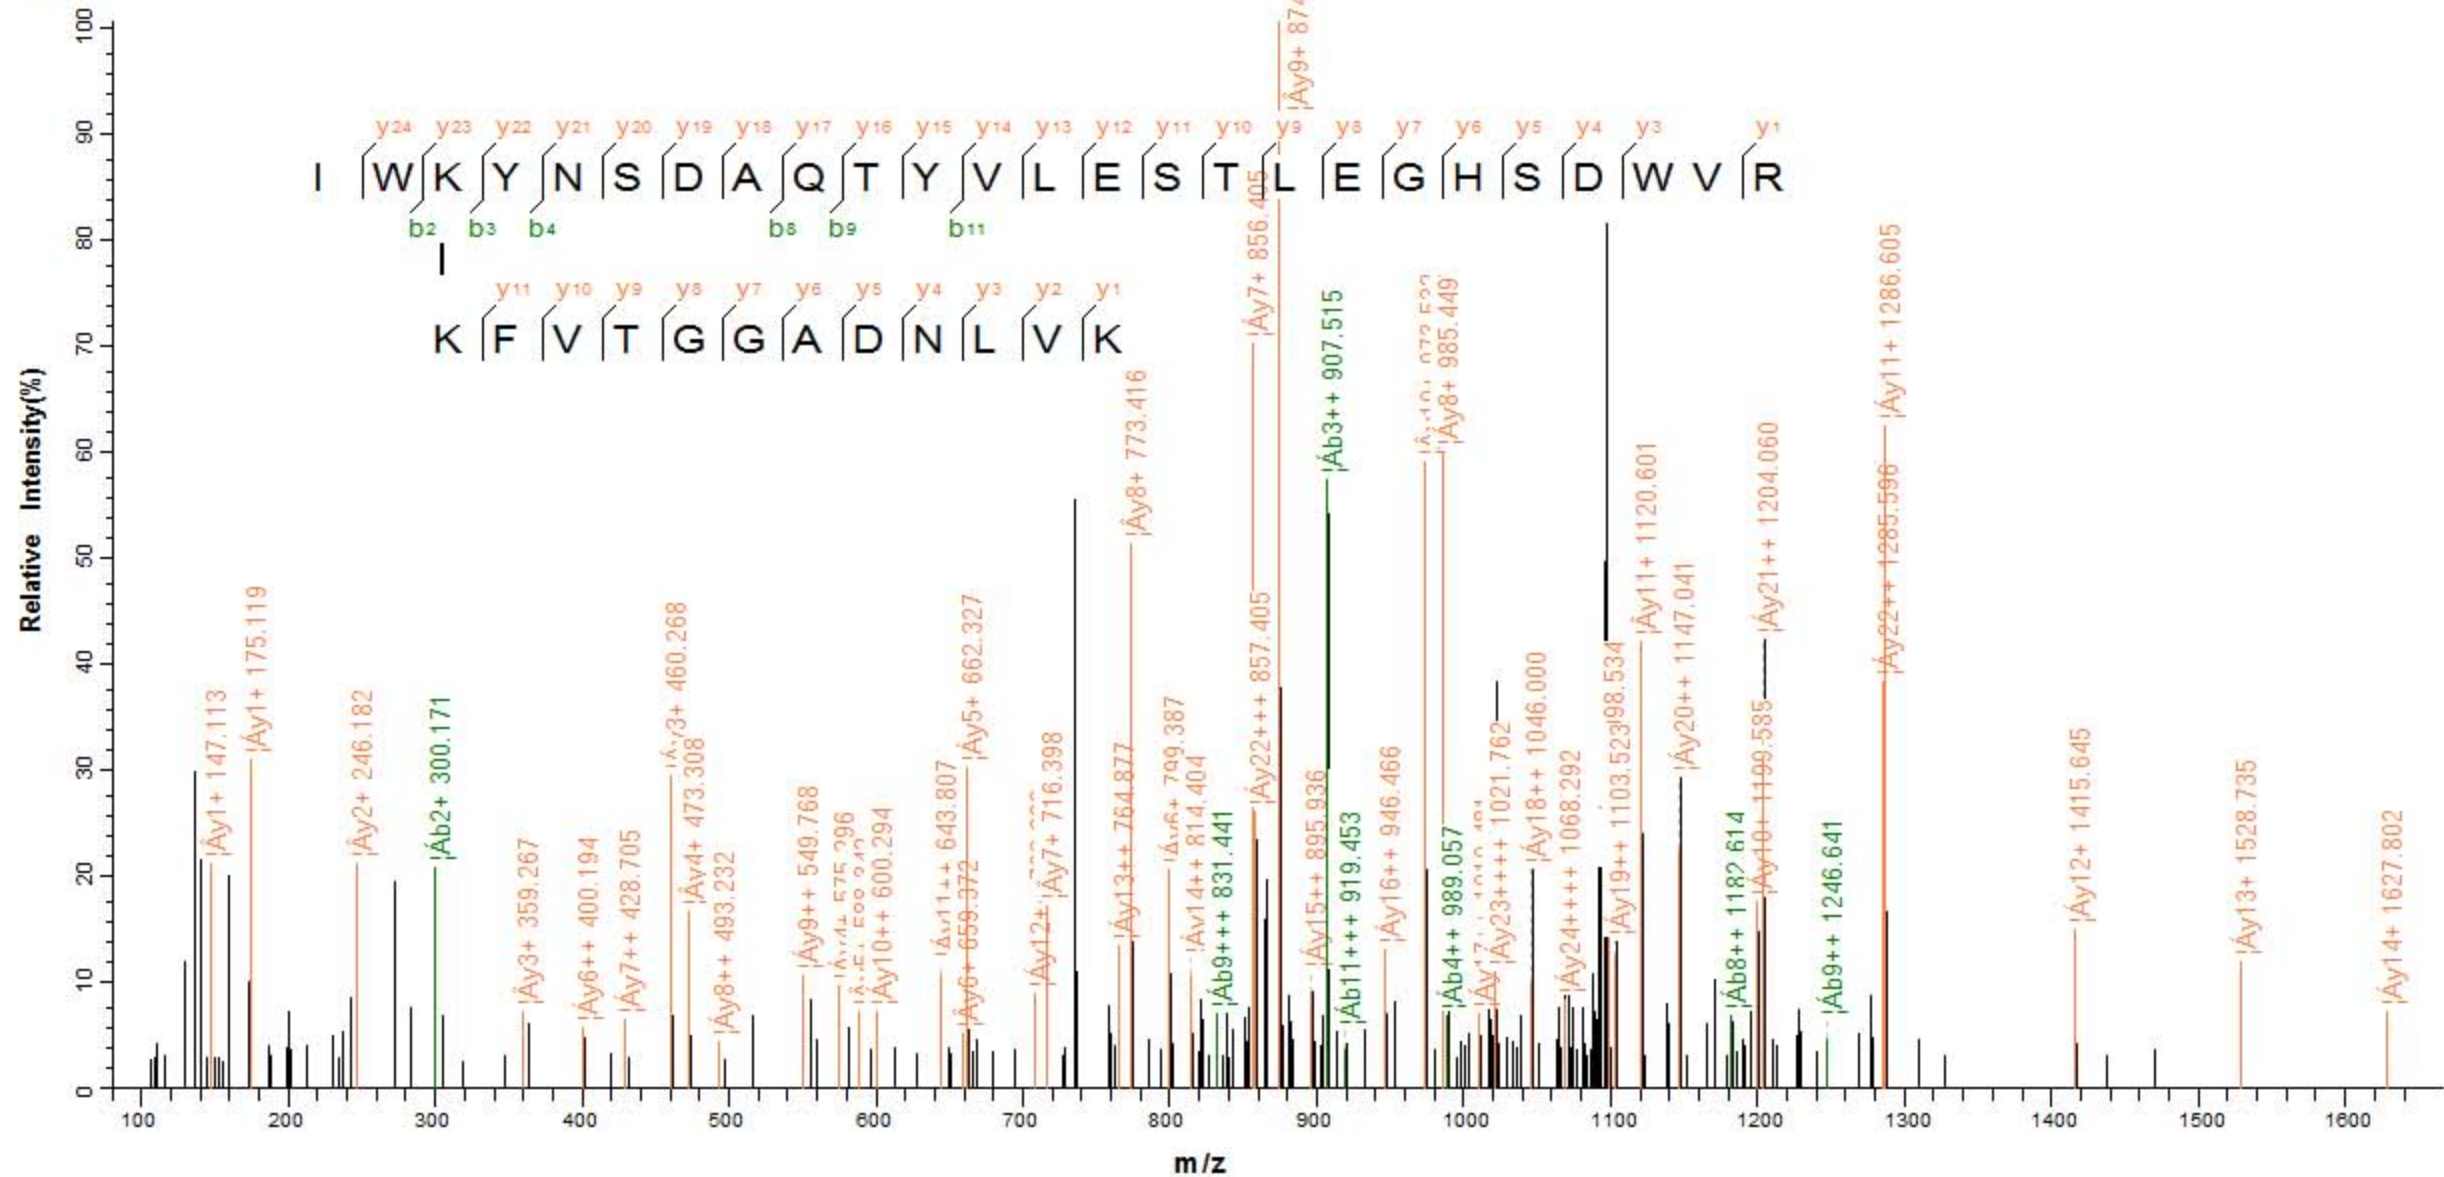

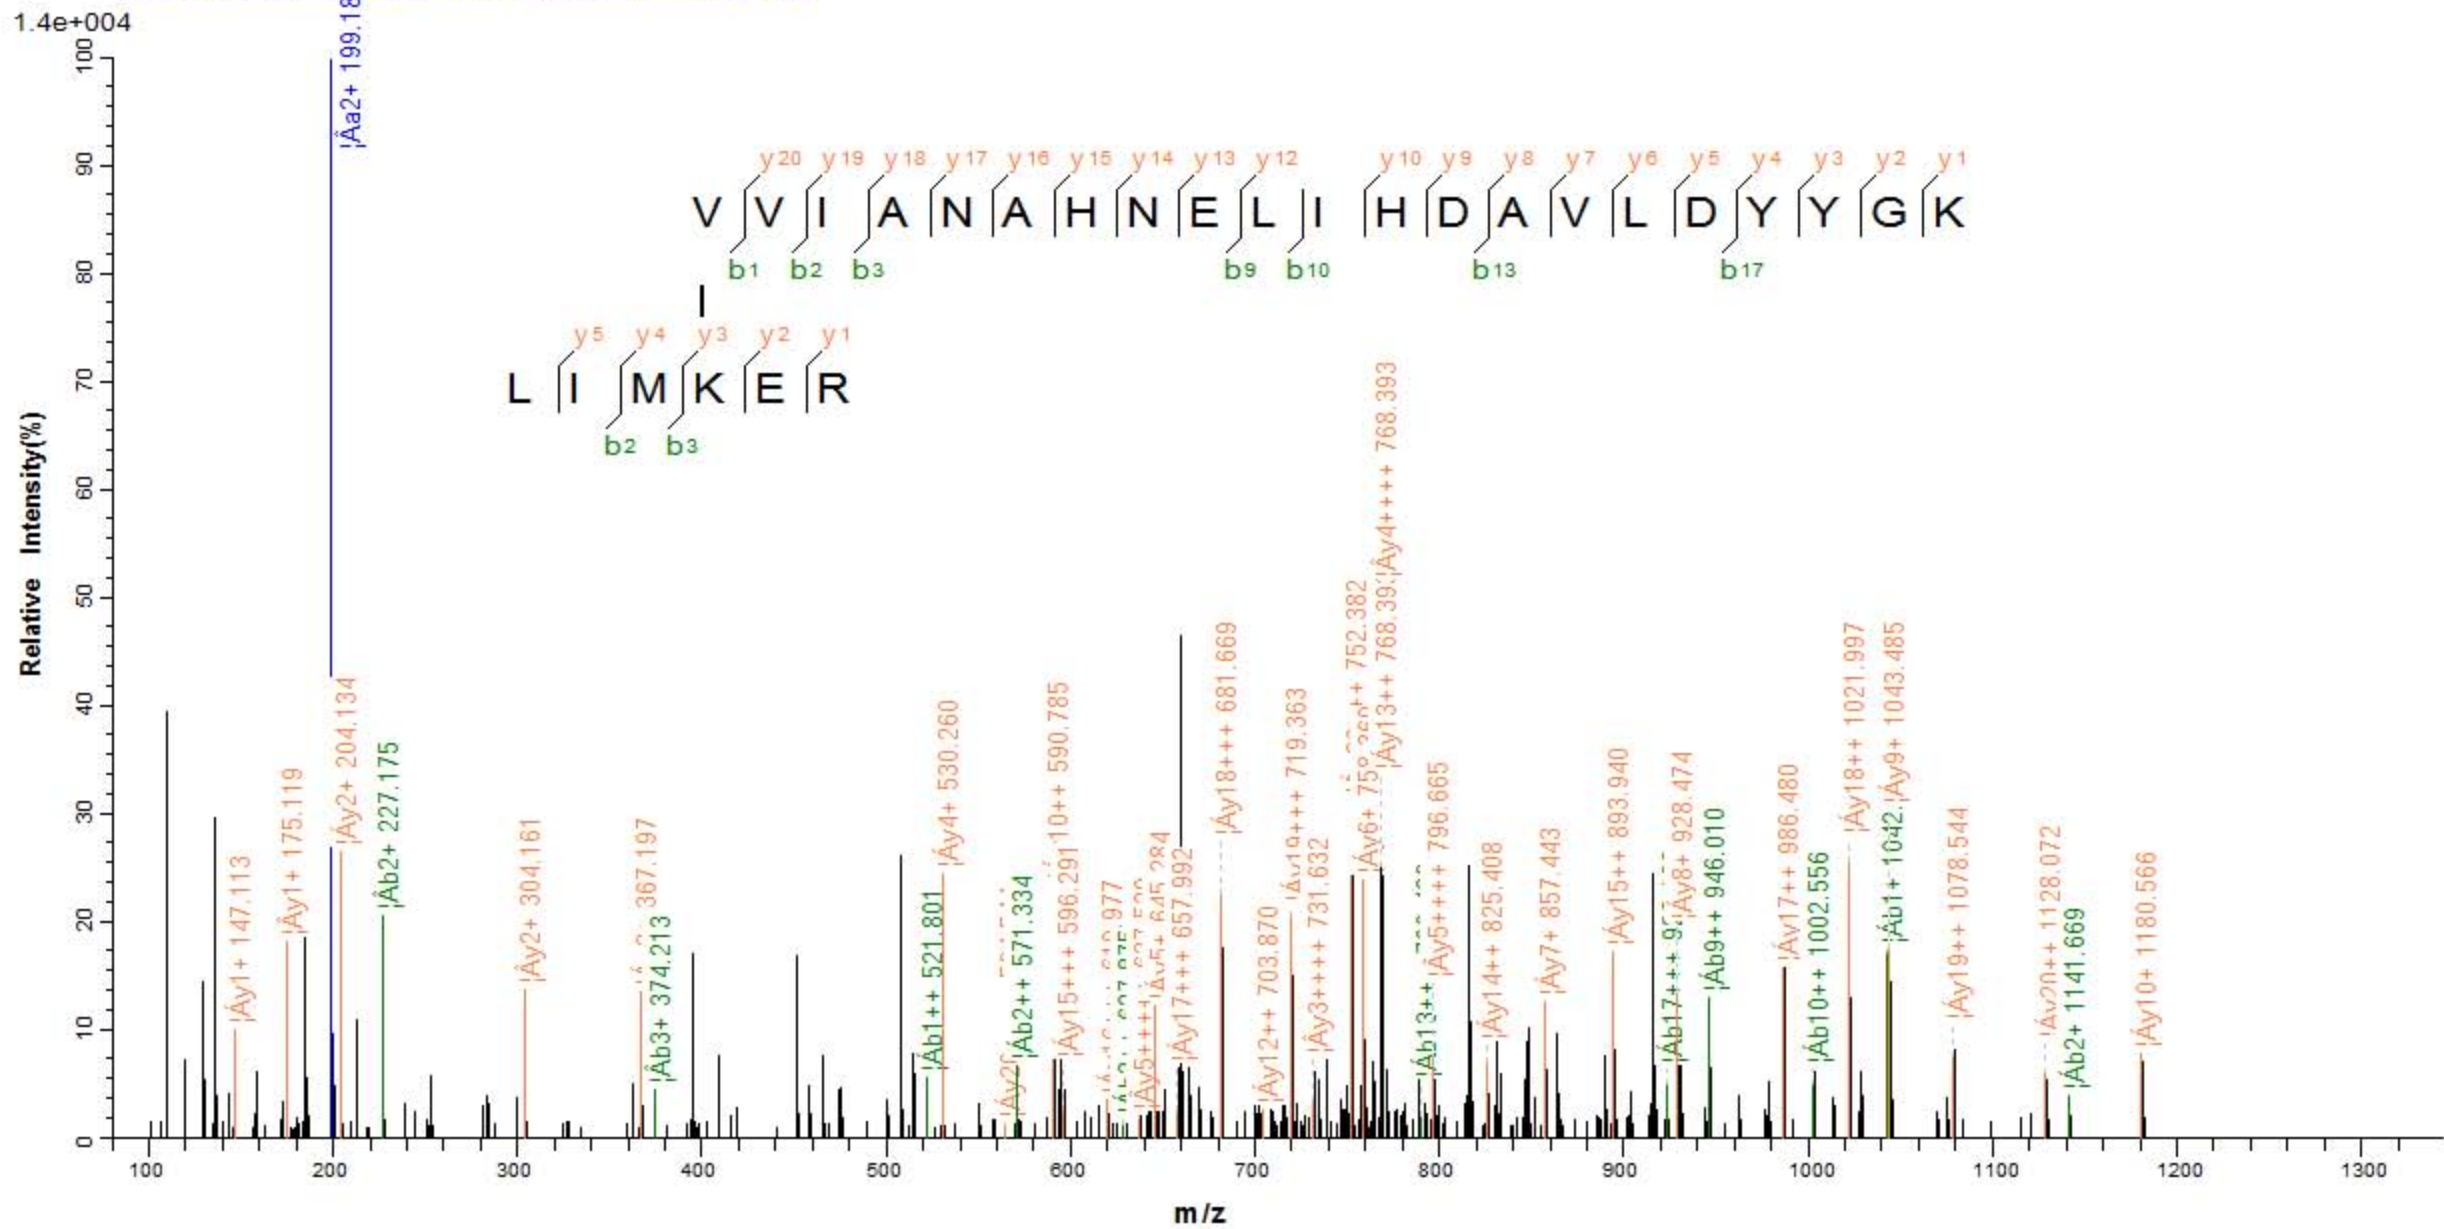

1.18e-008LIHDAVLDDYYGK-FSTGSMLLTKDIVGKta

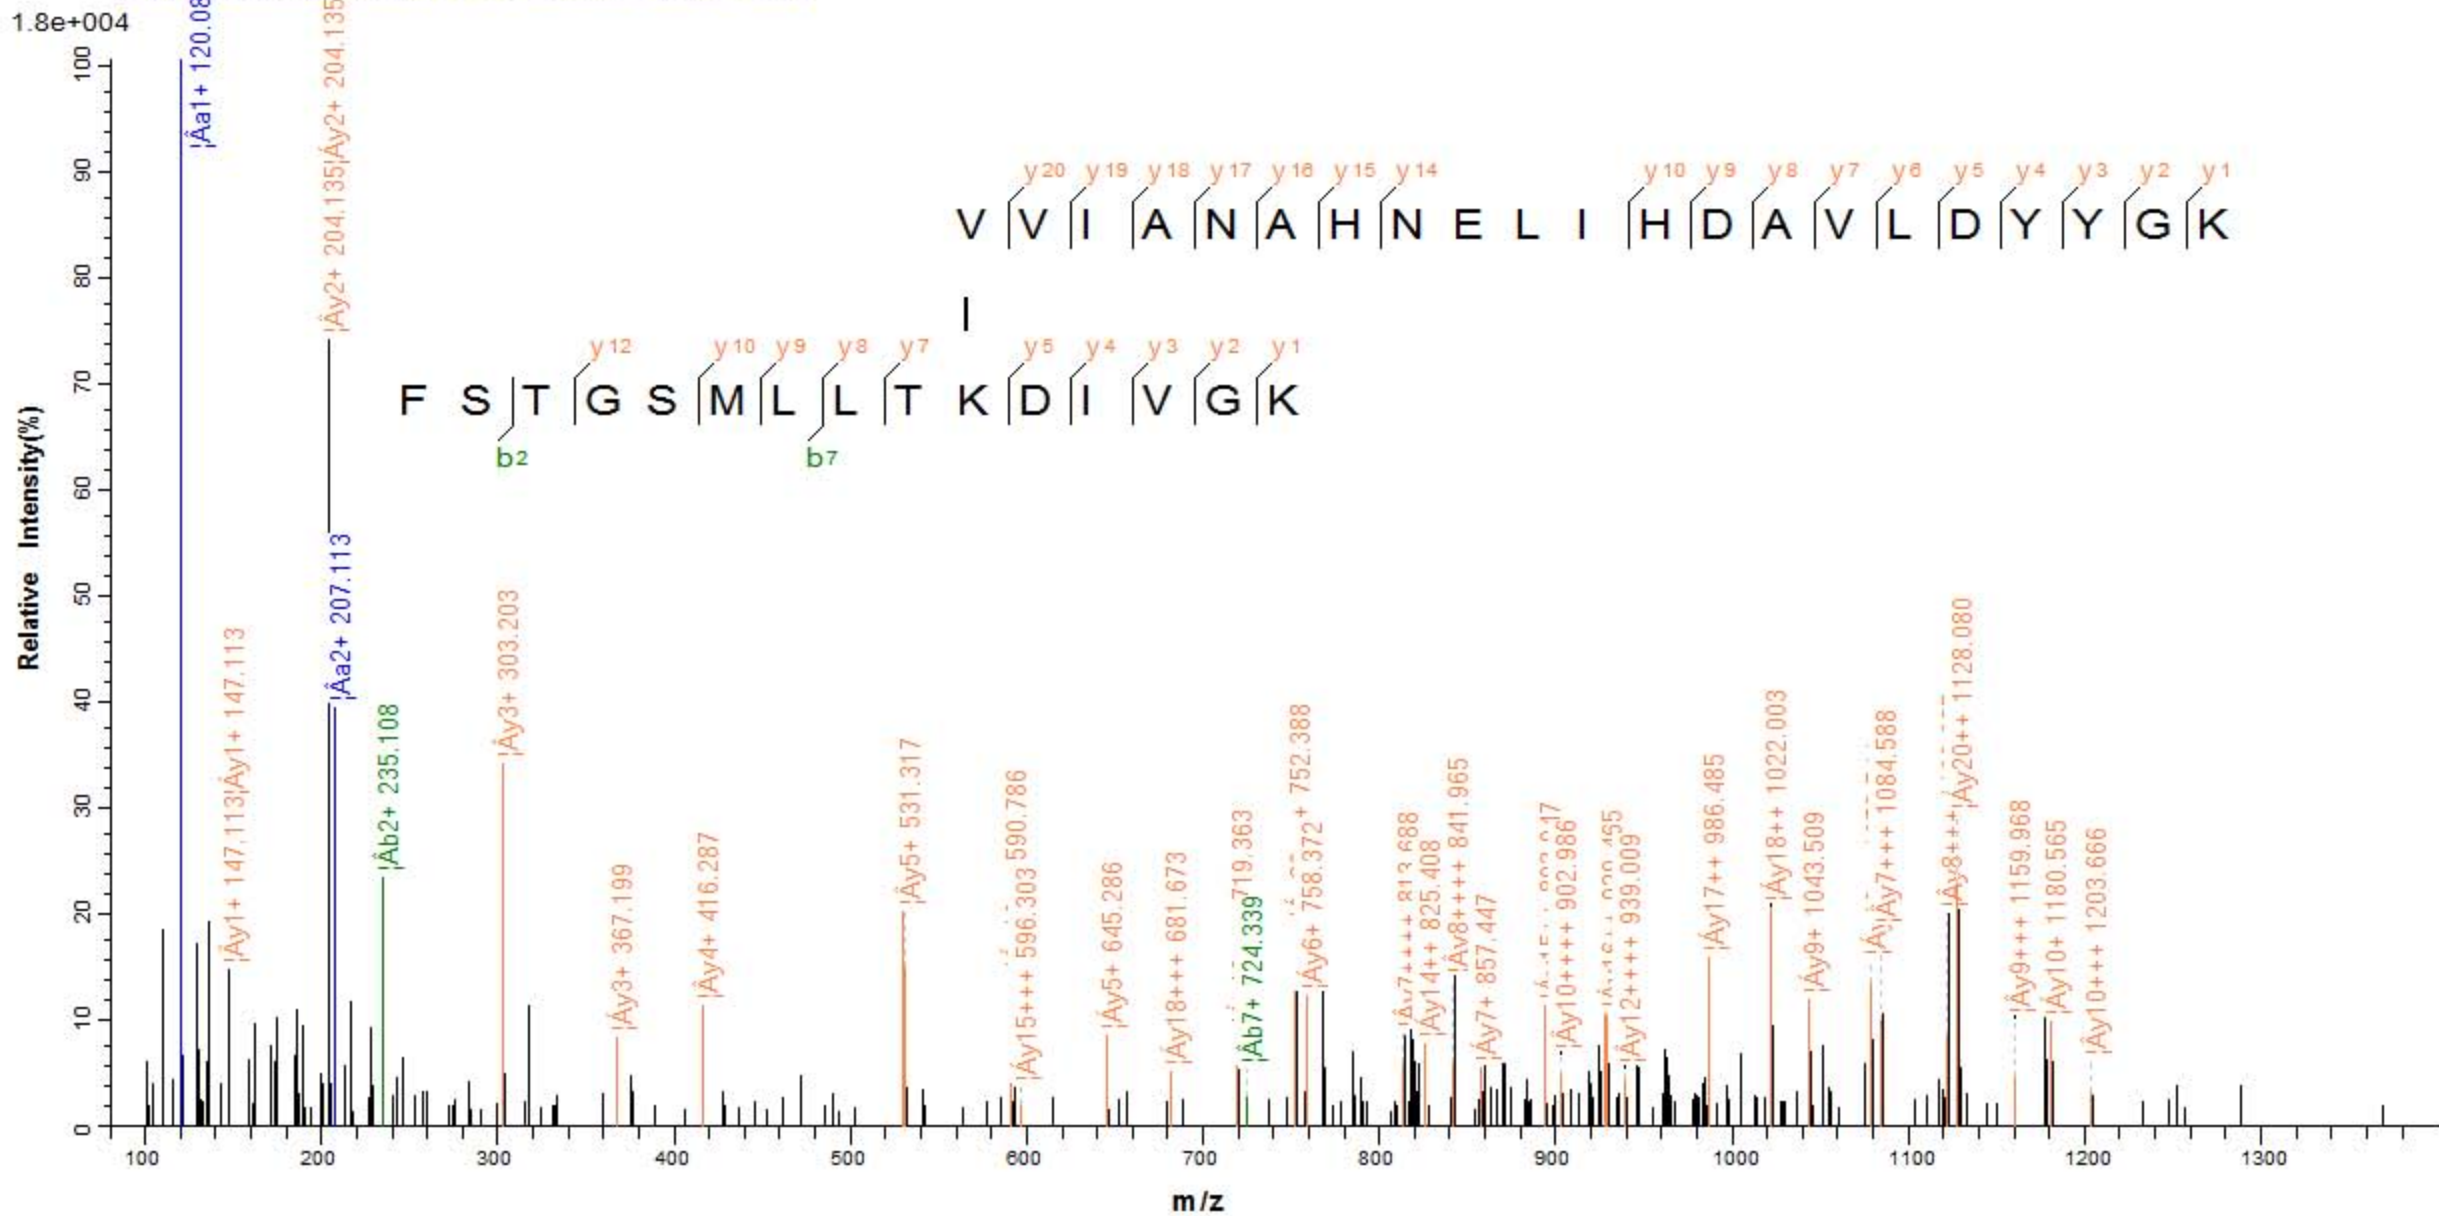

7.5e+003

Relative Intensity(%)

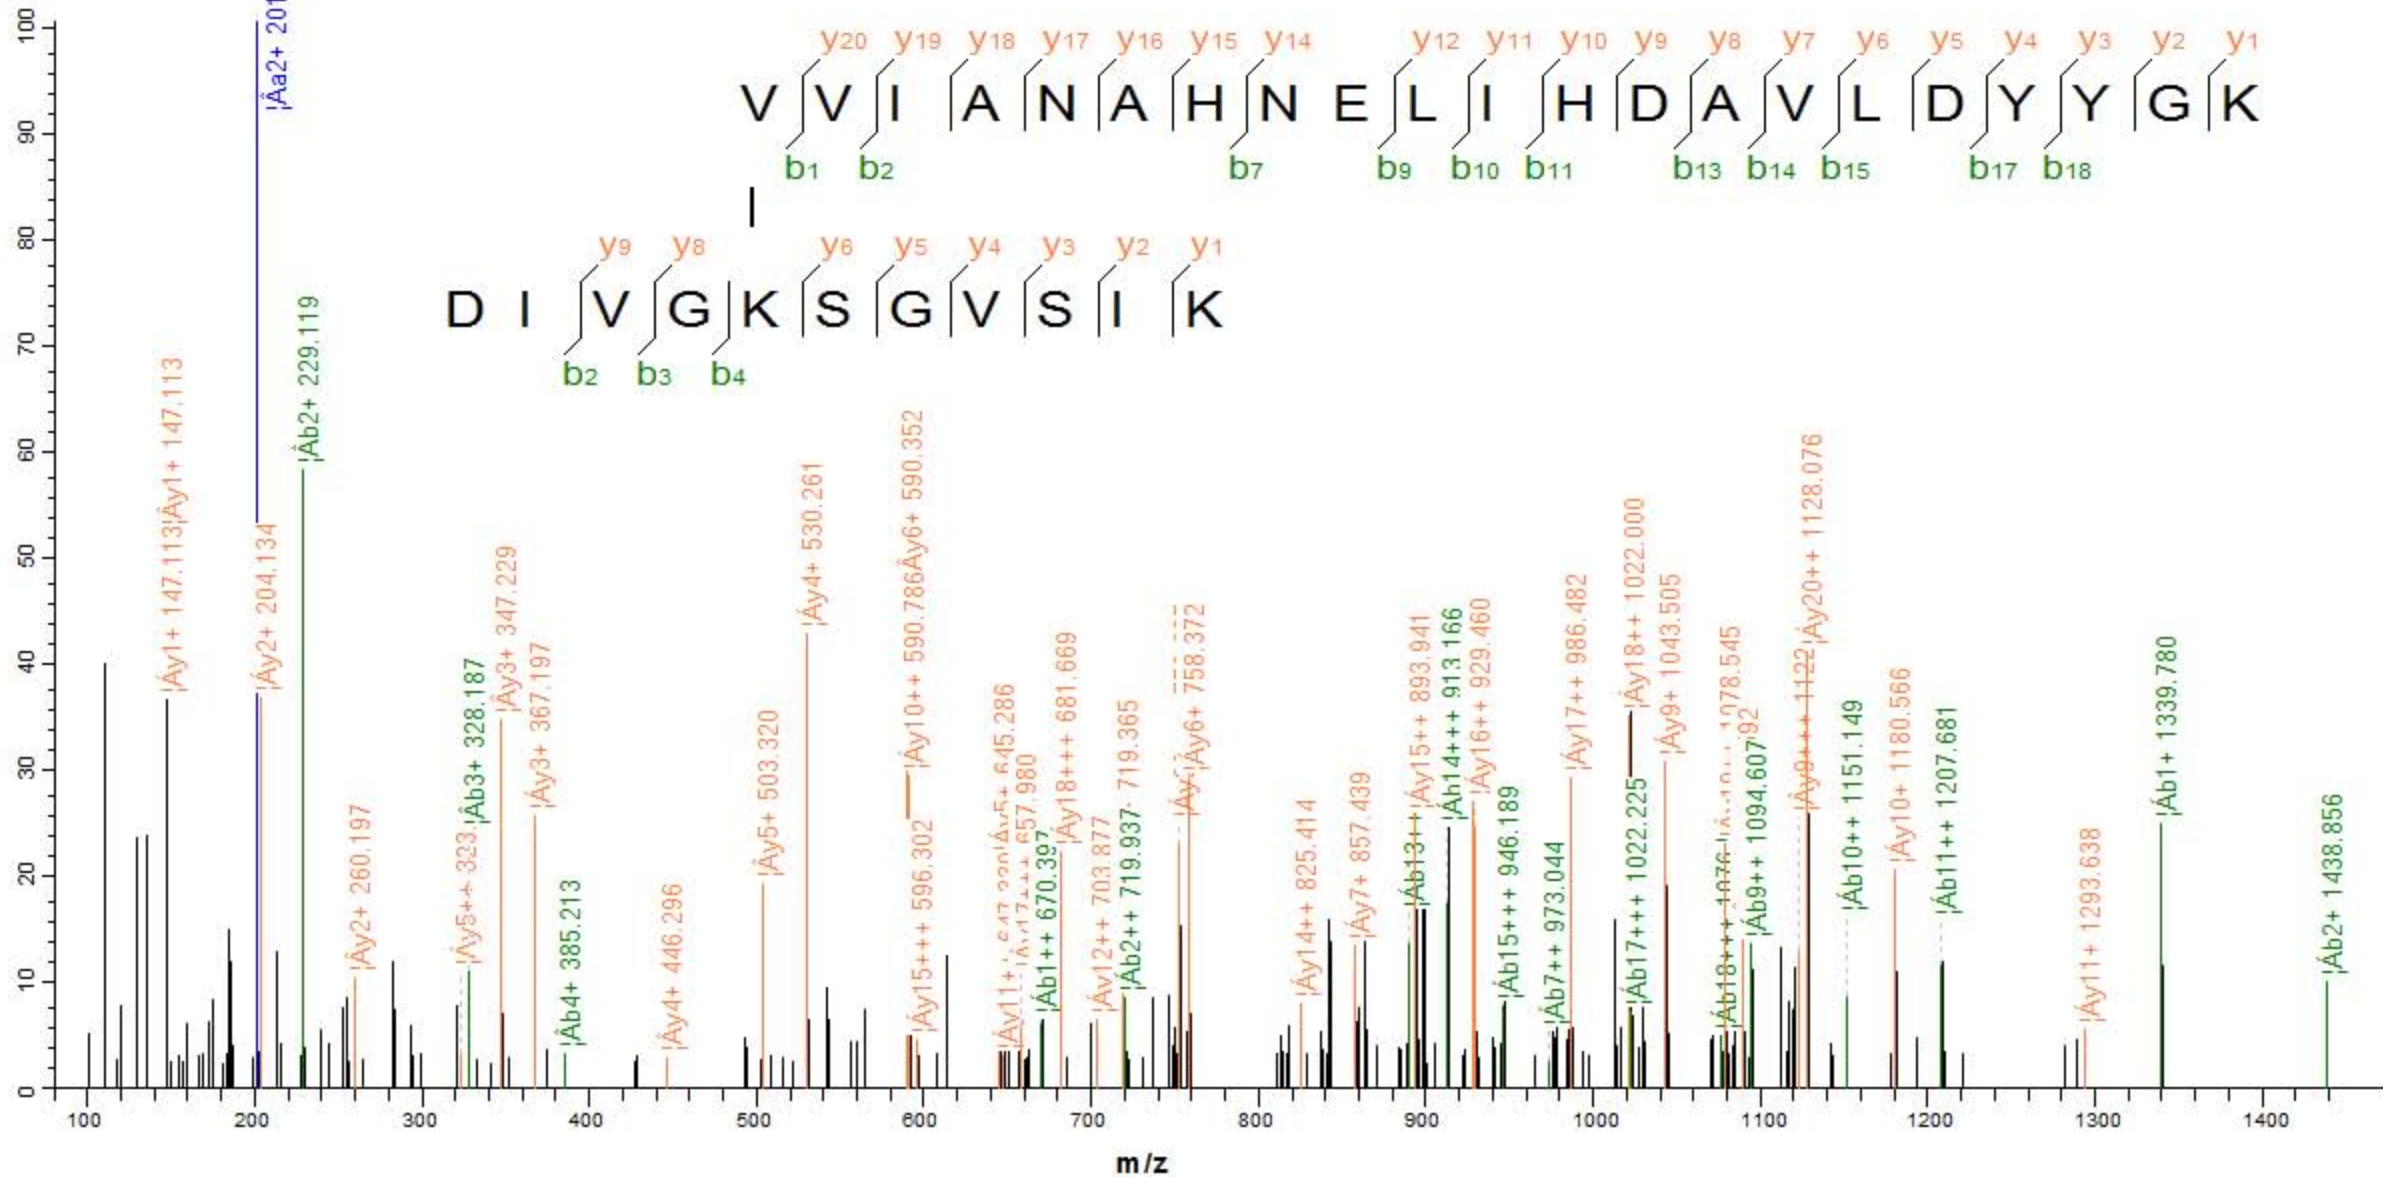

6.2e+003

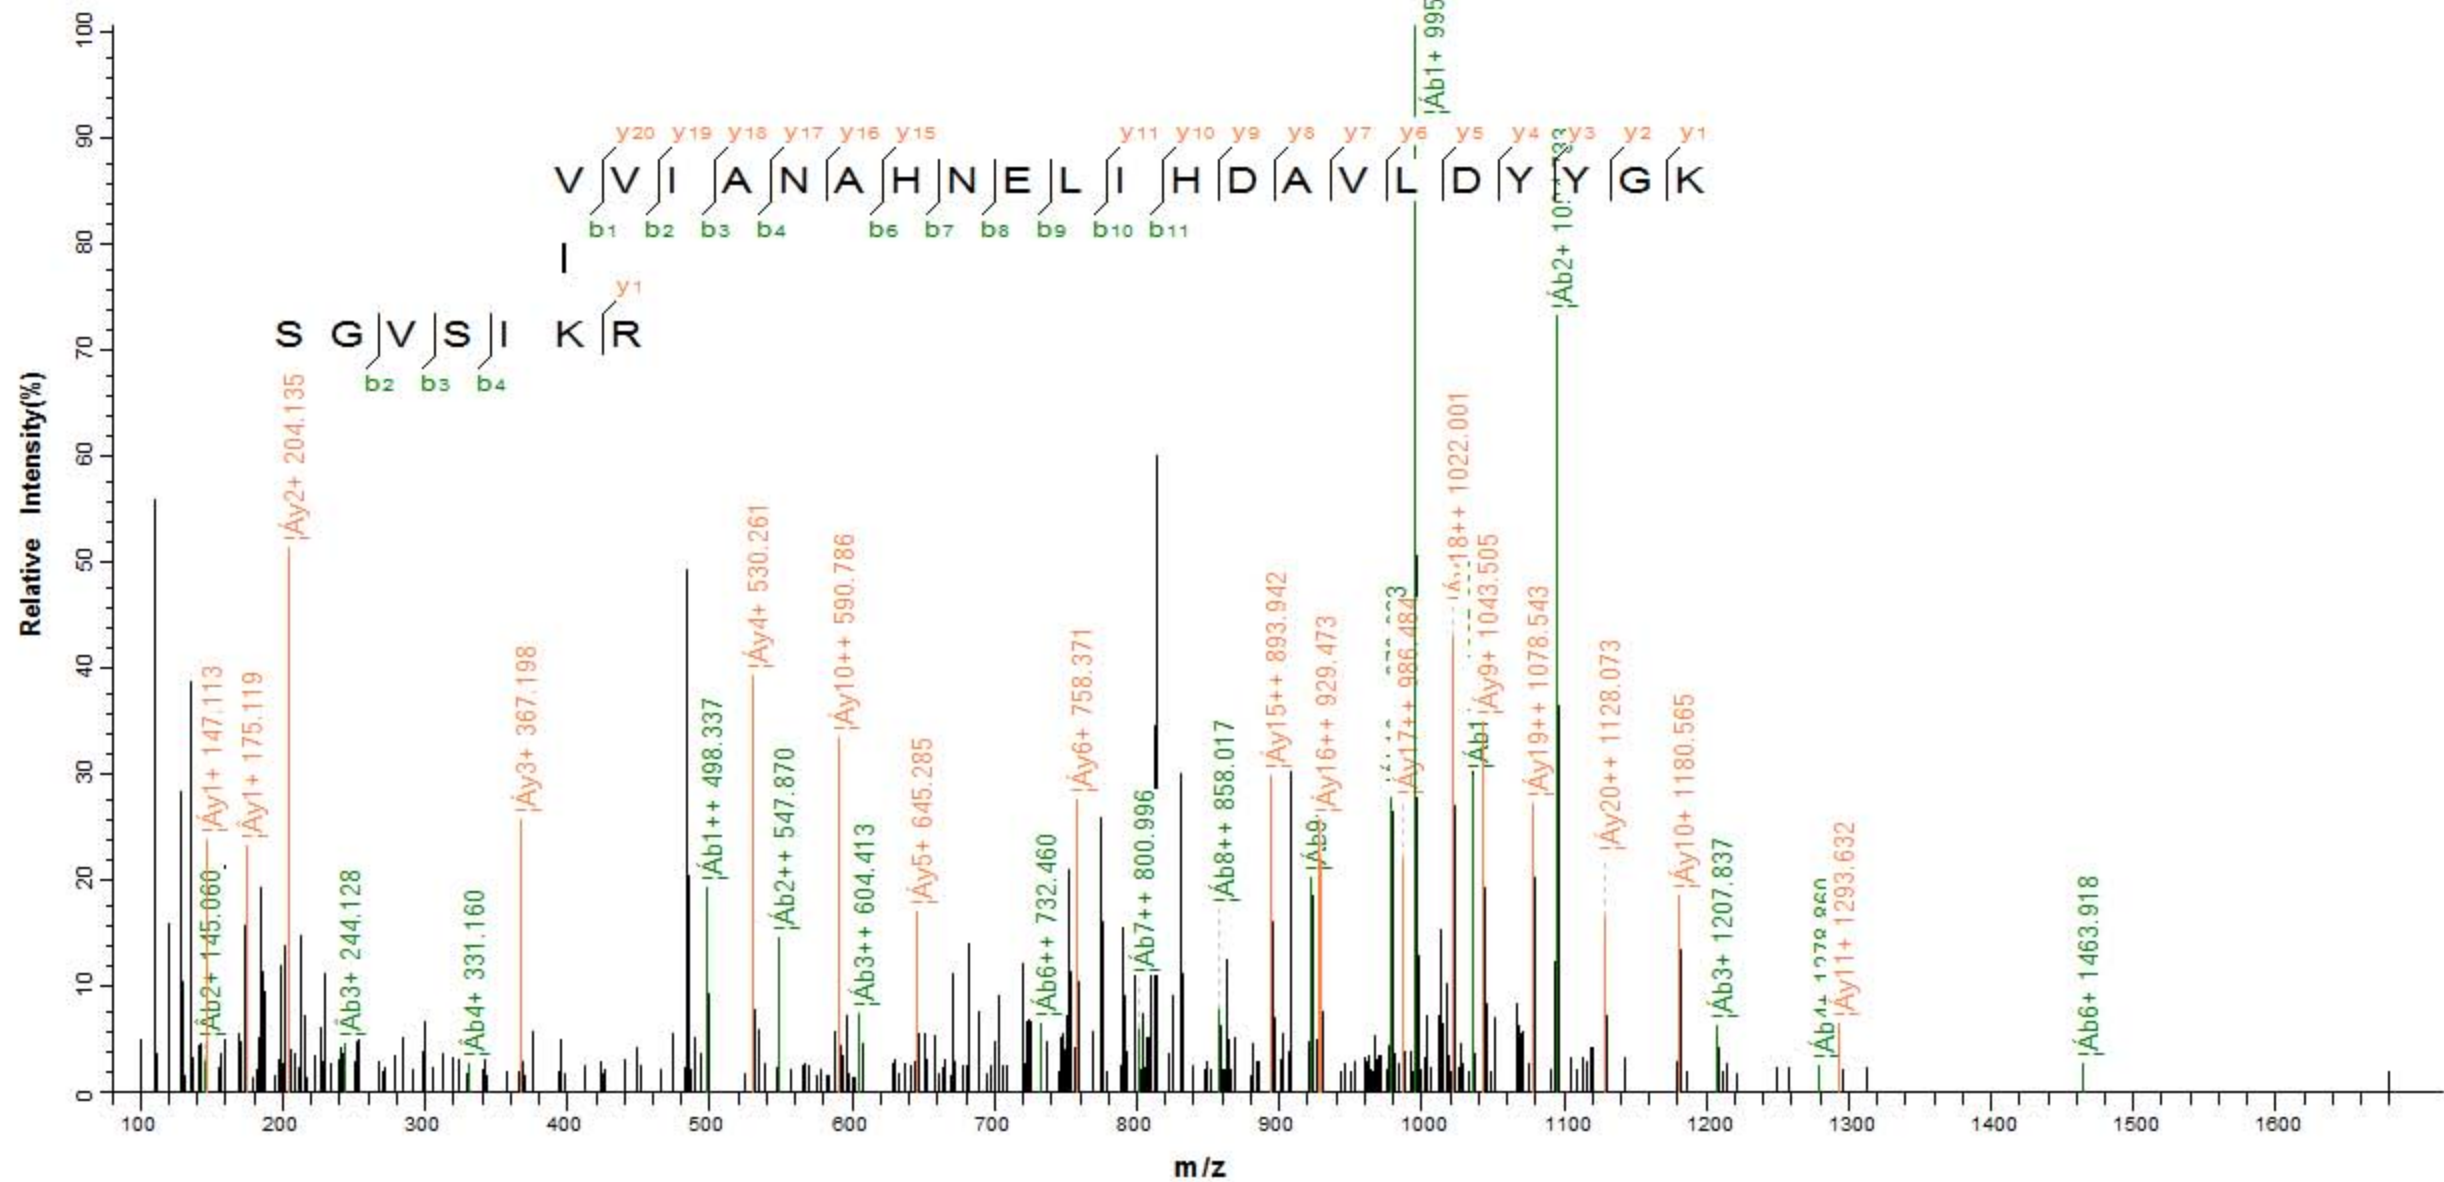

7.7e+004

Relative Intensity(%)

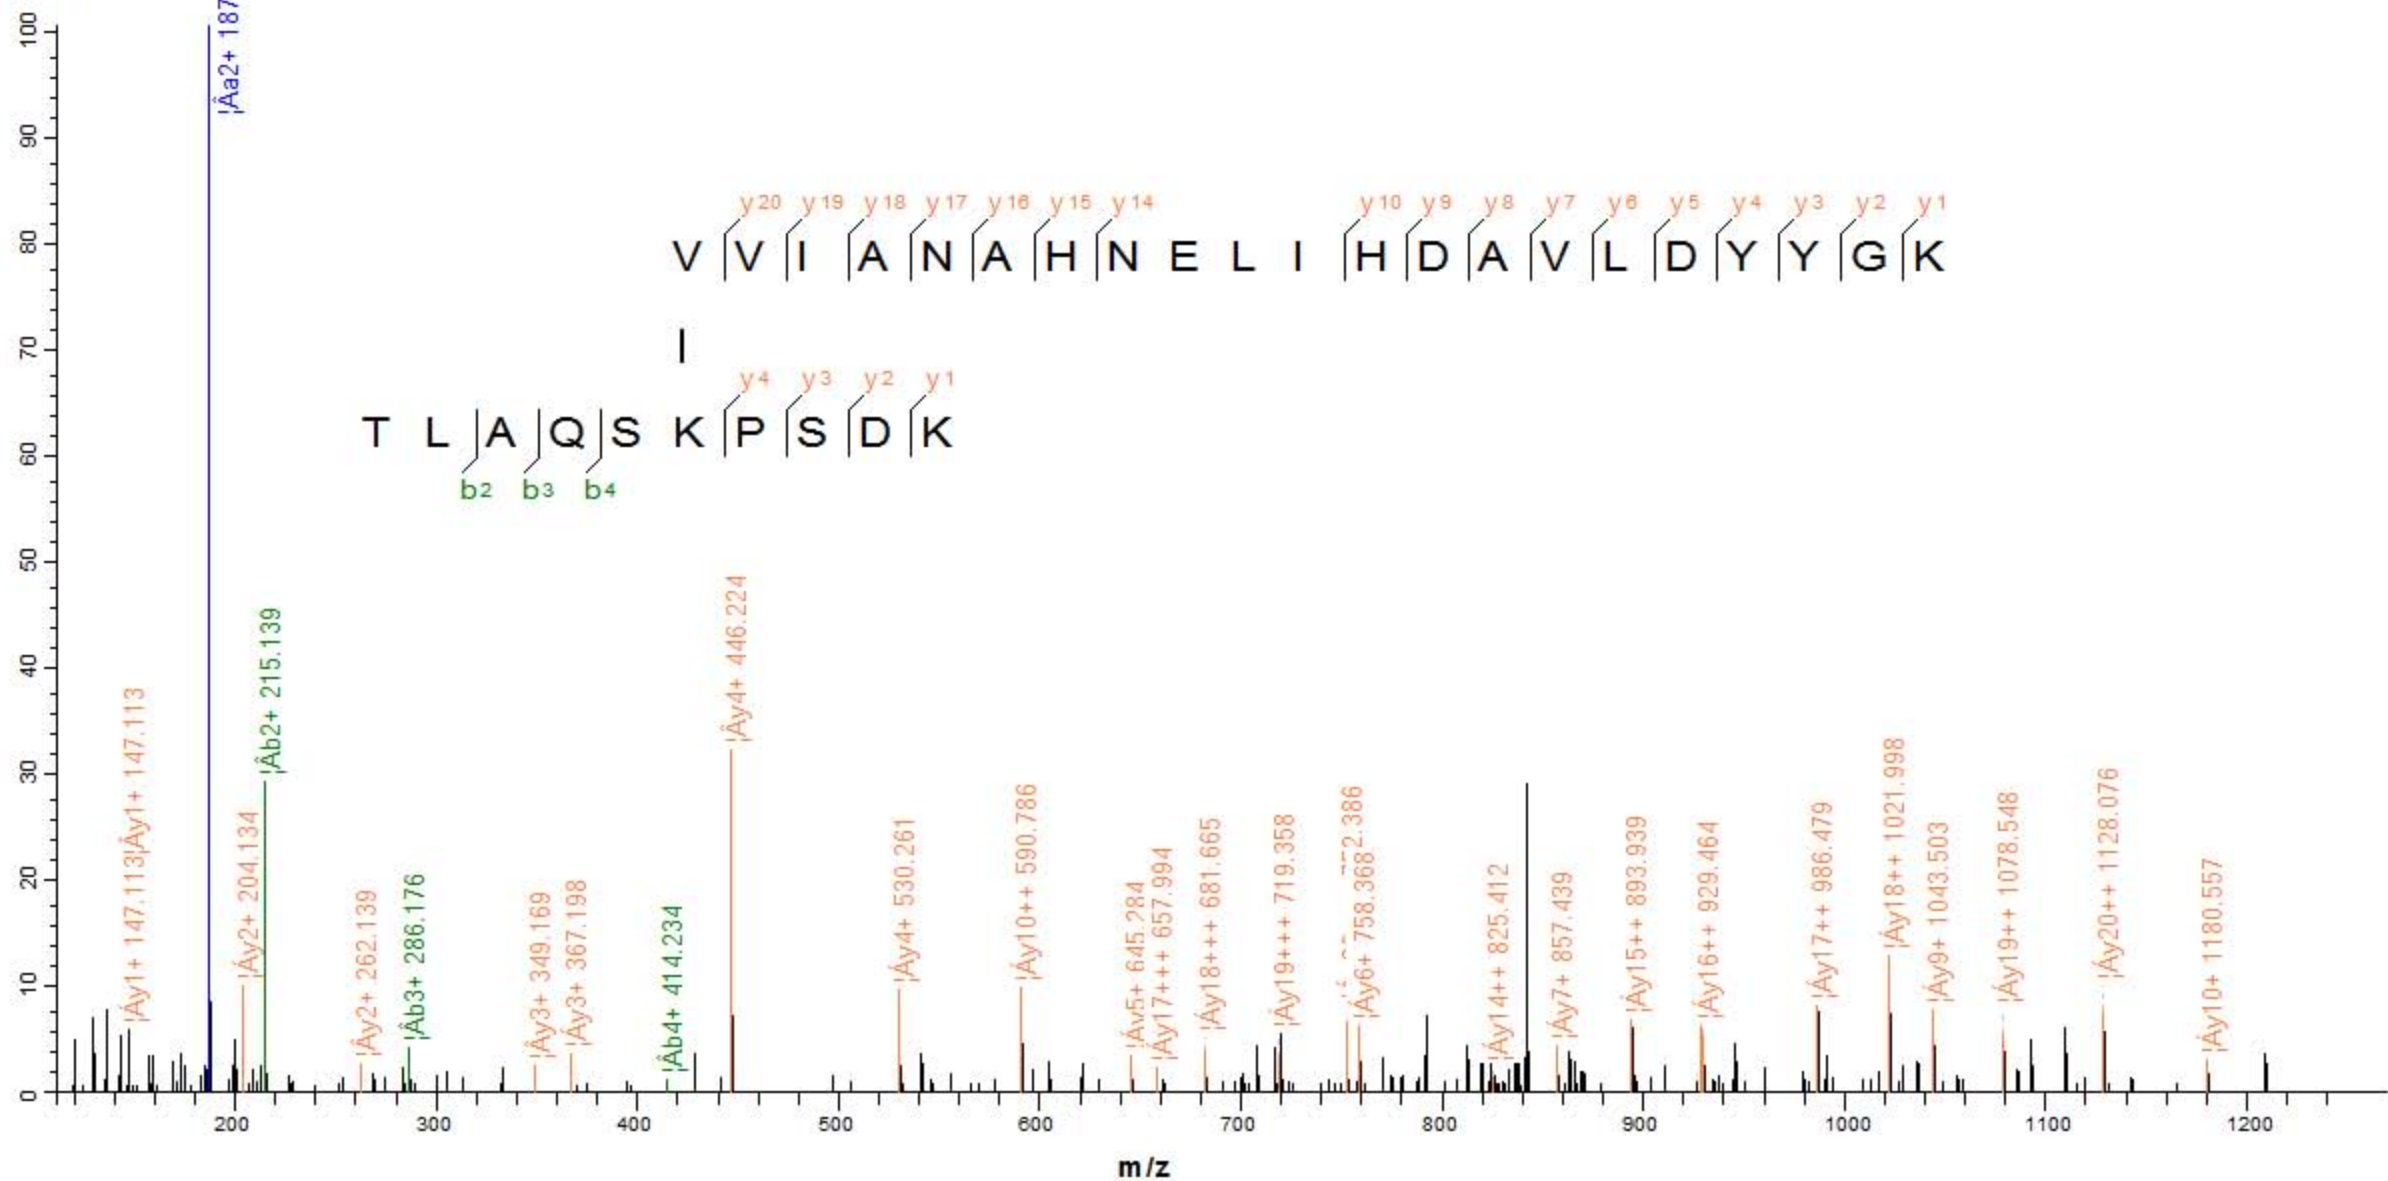

1.8e+003

Relative Intensity(%)

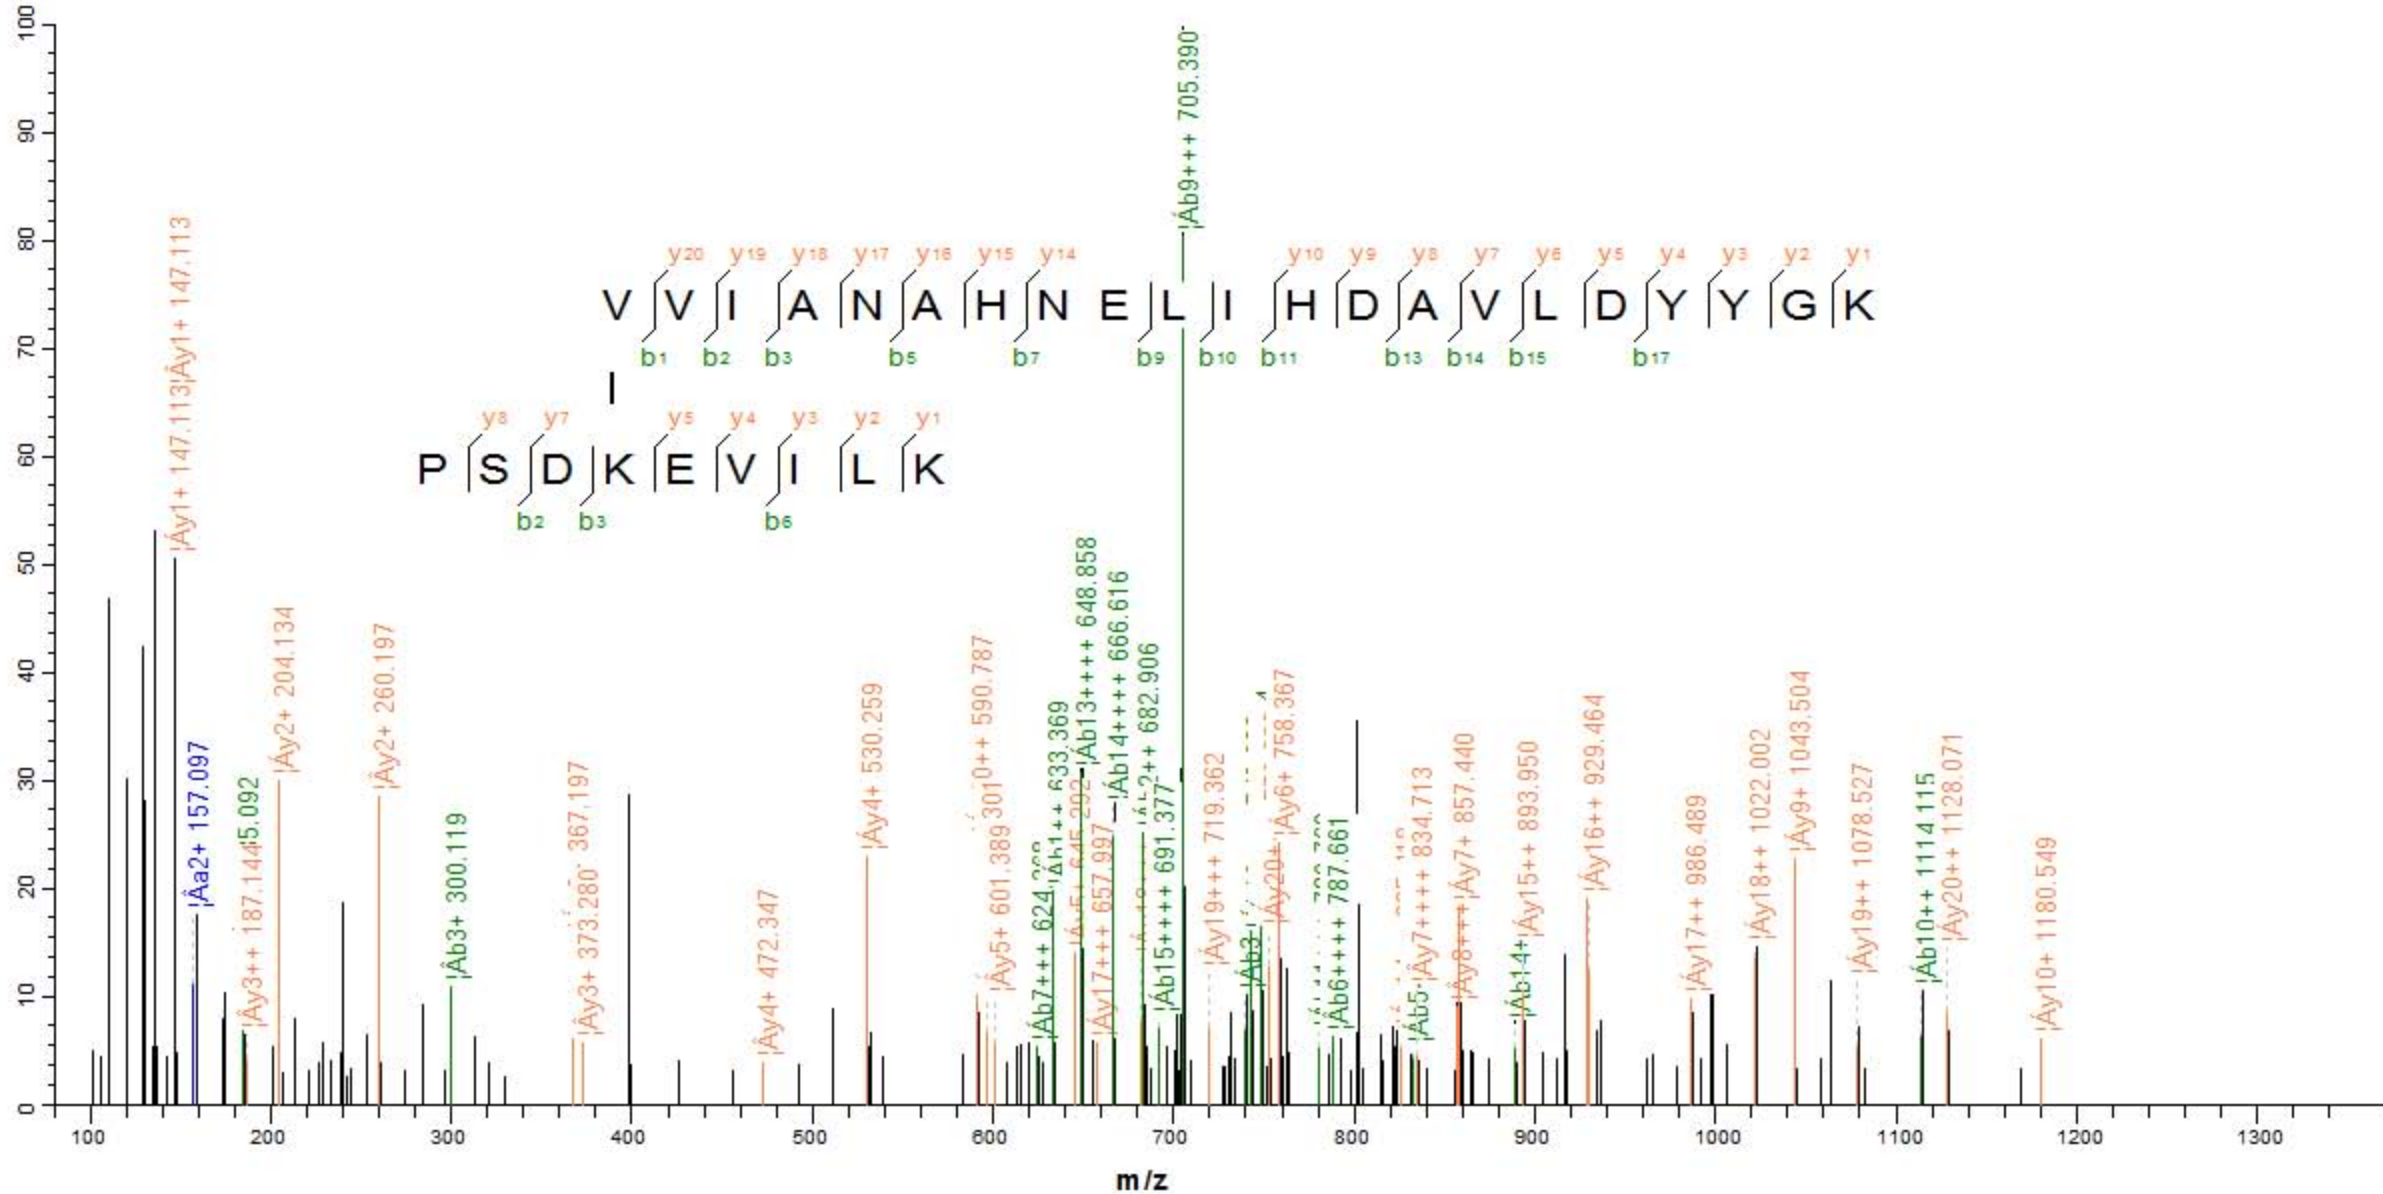

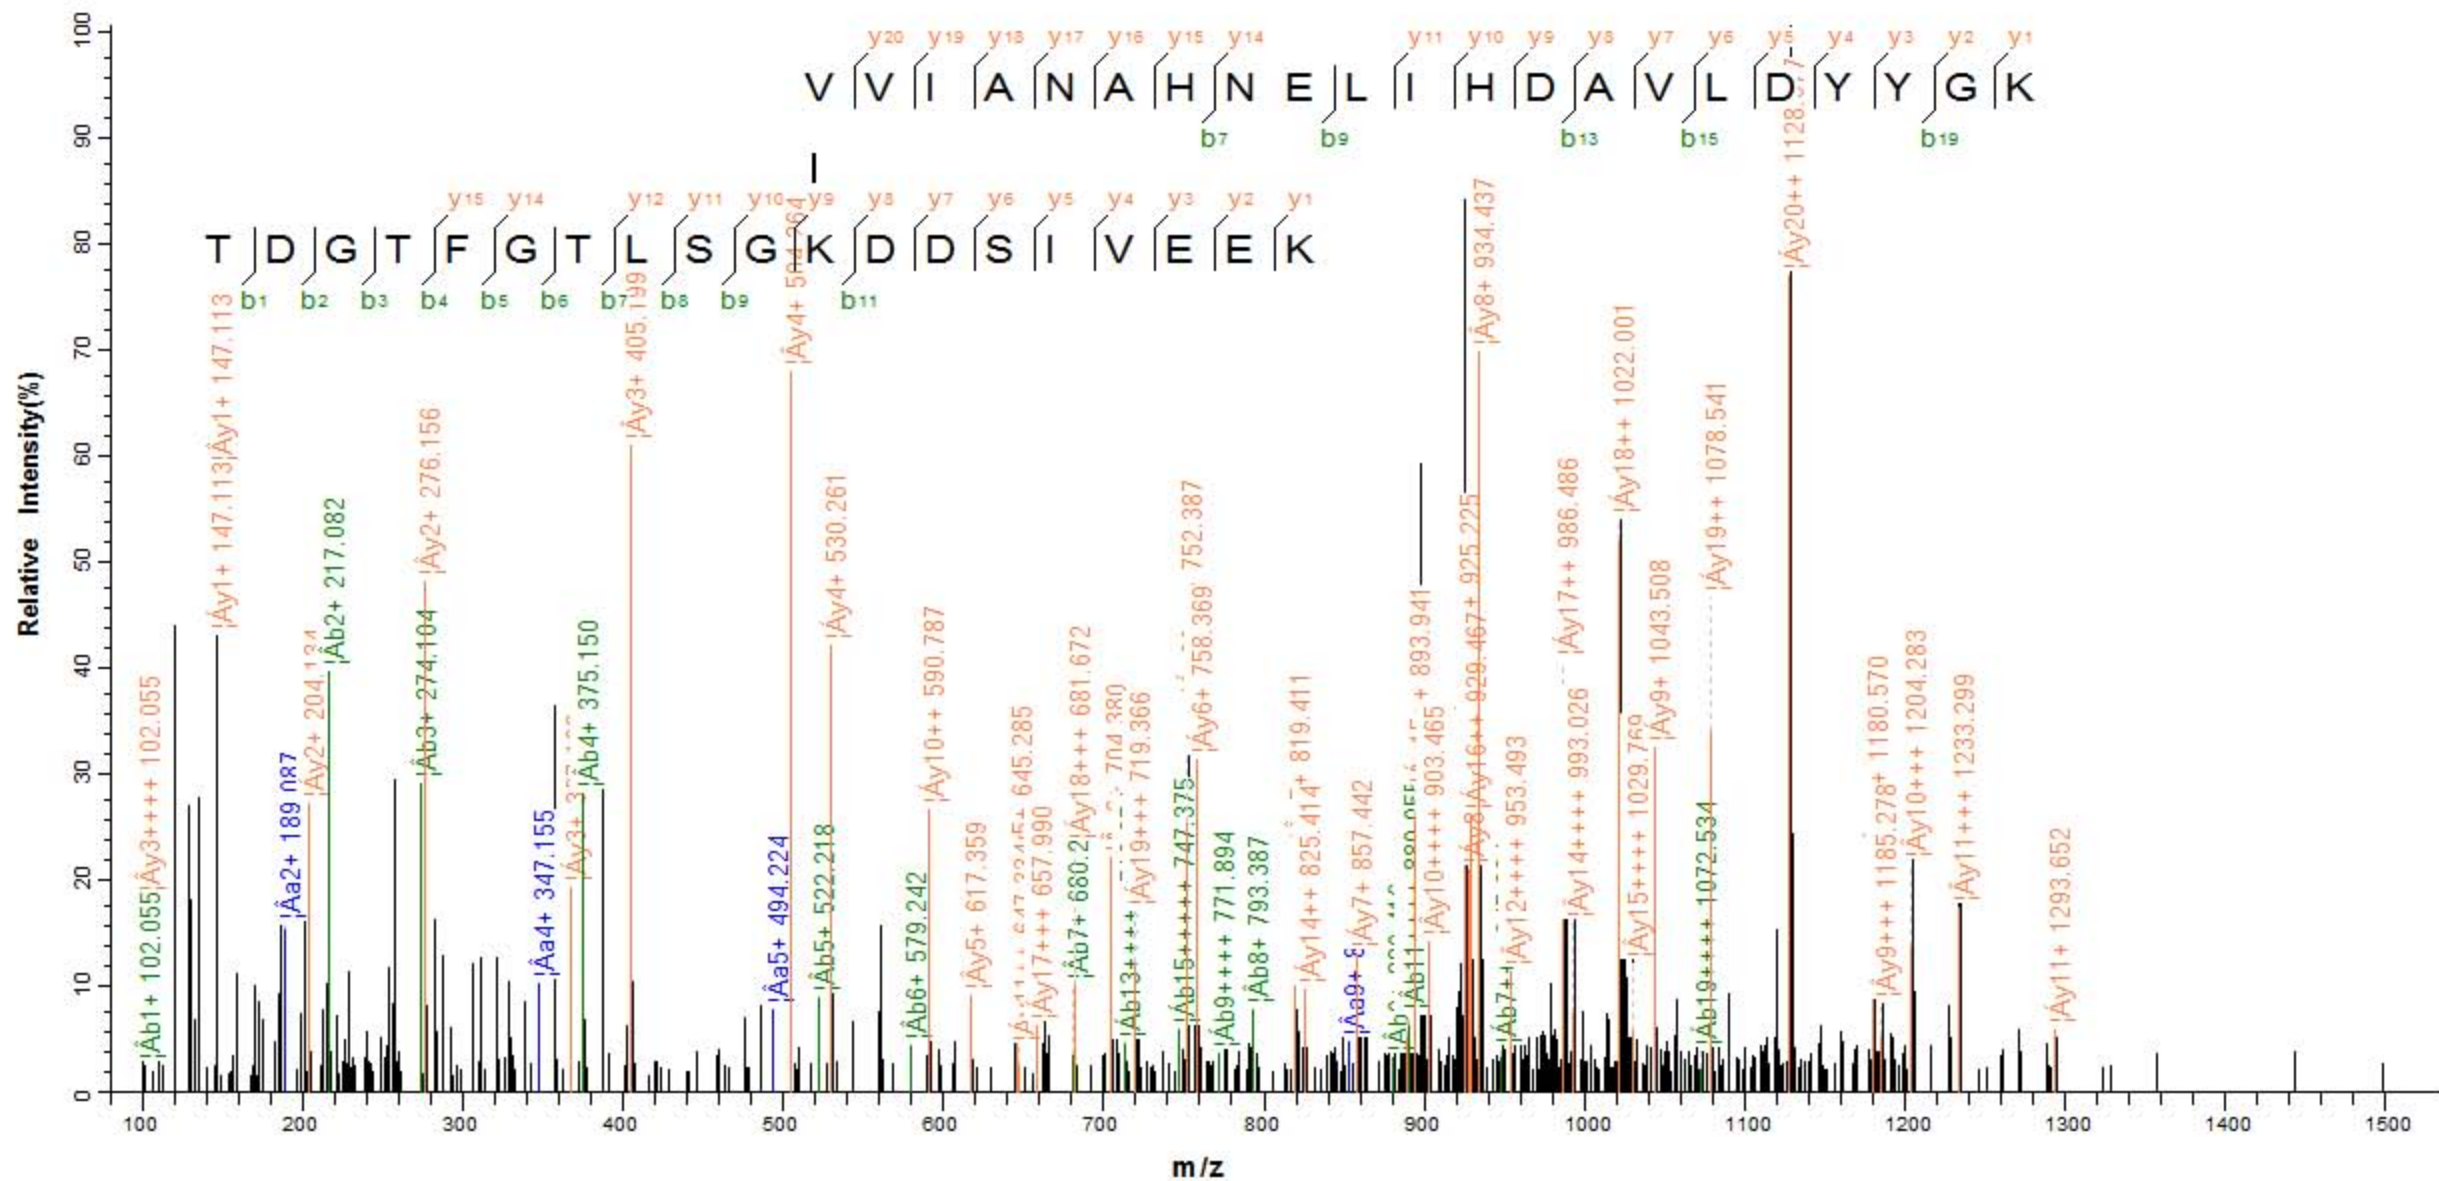



3.4e+004

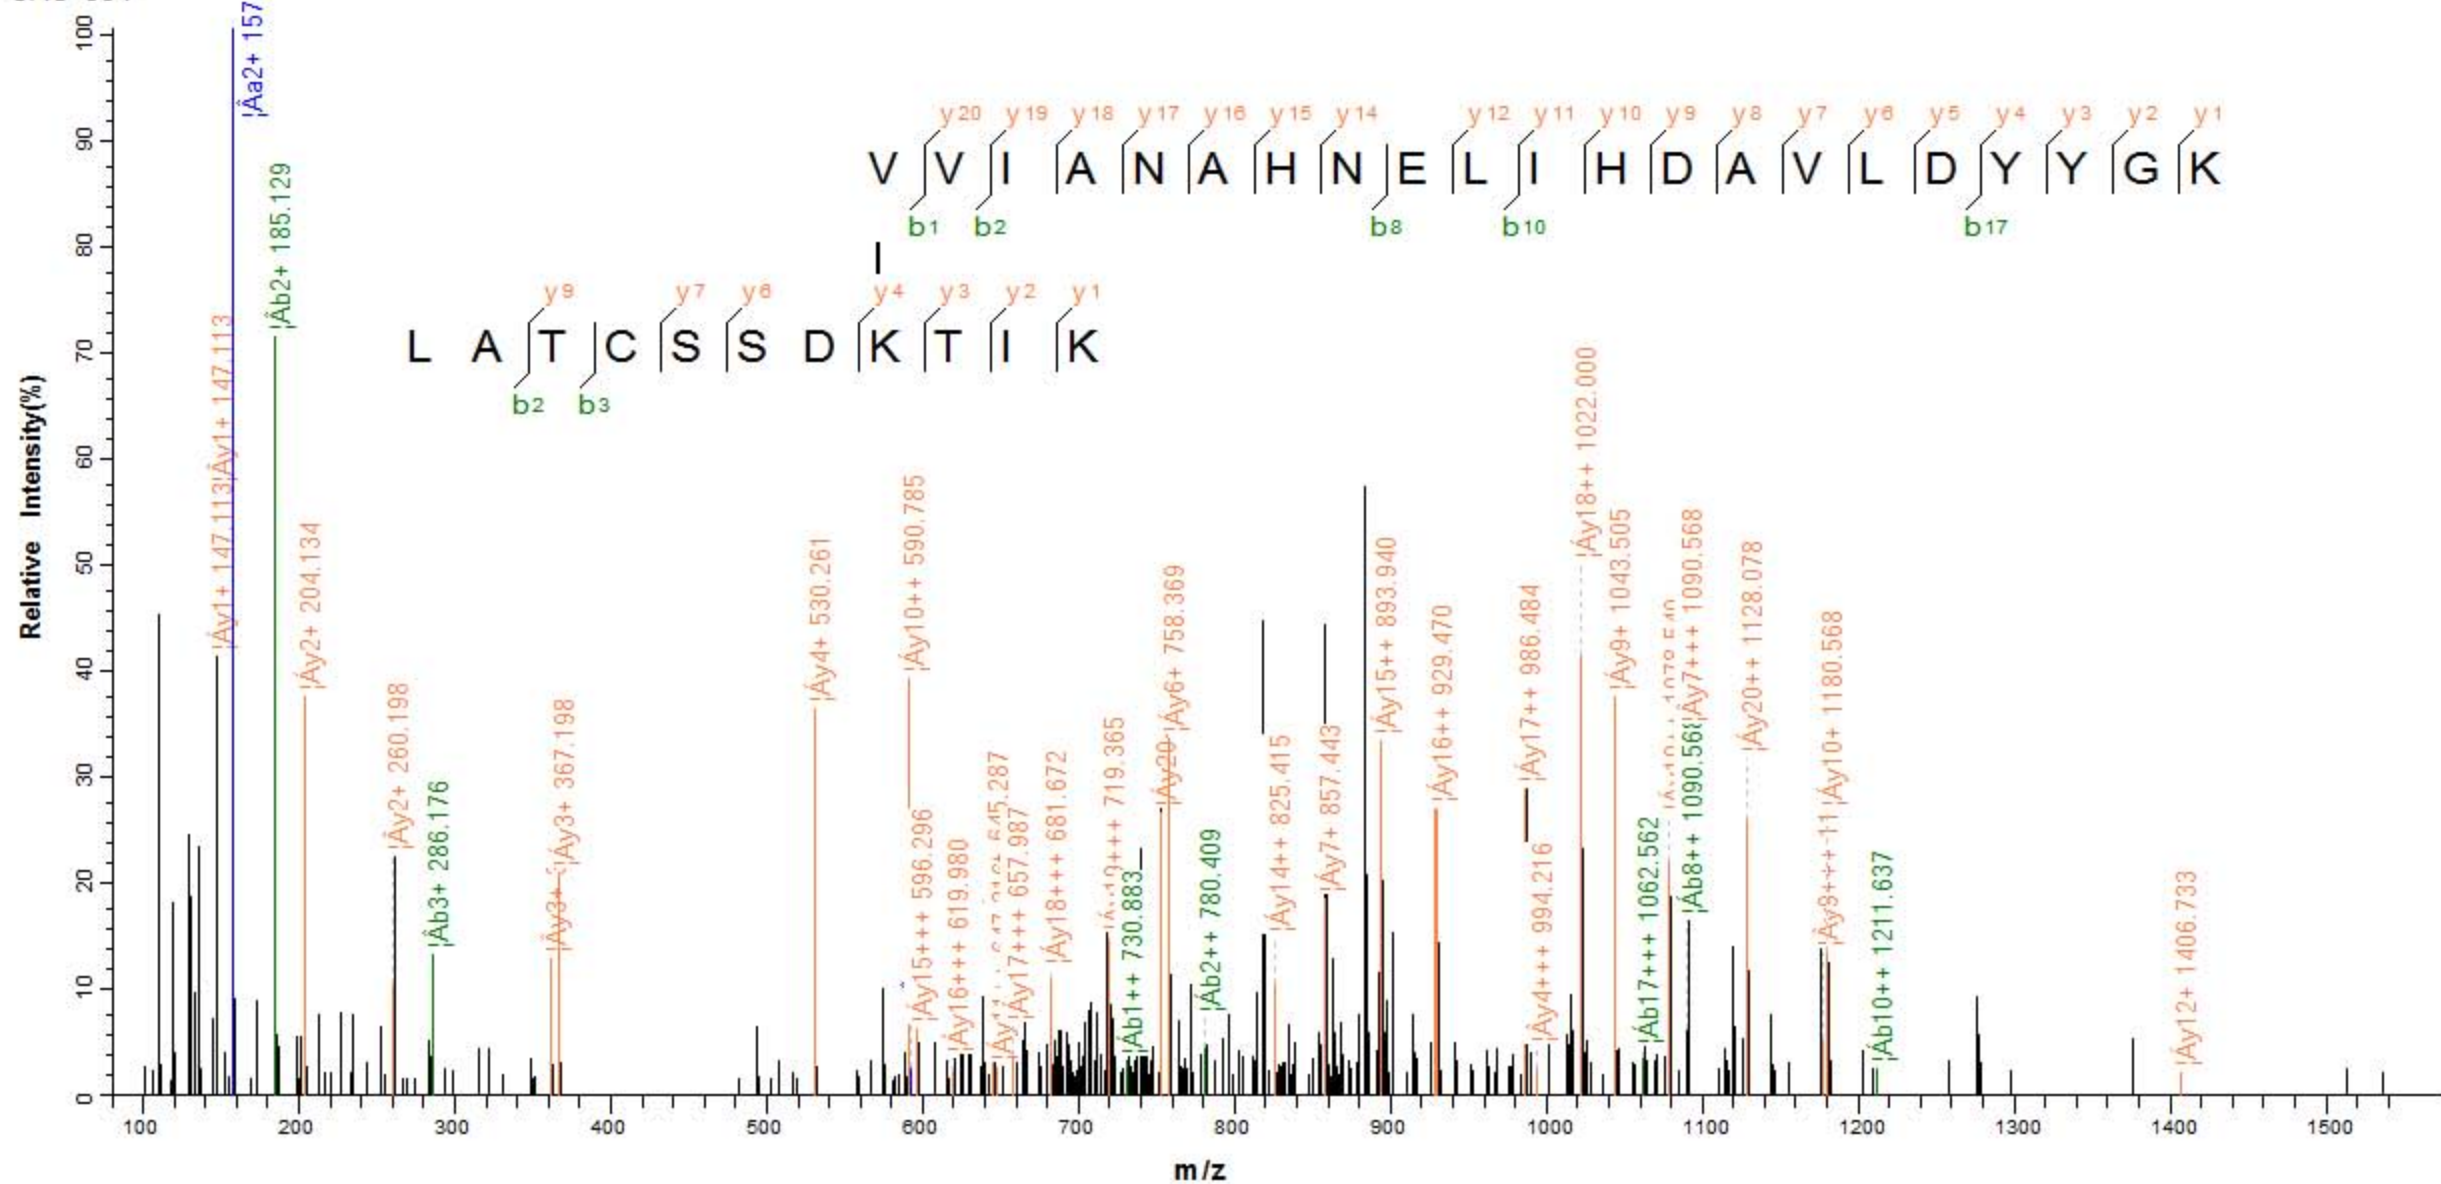

1.3e+004

Relative Intensity(%)

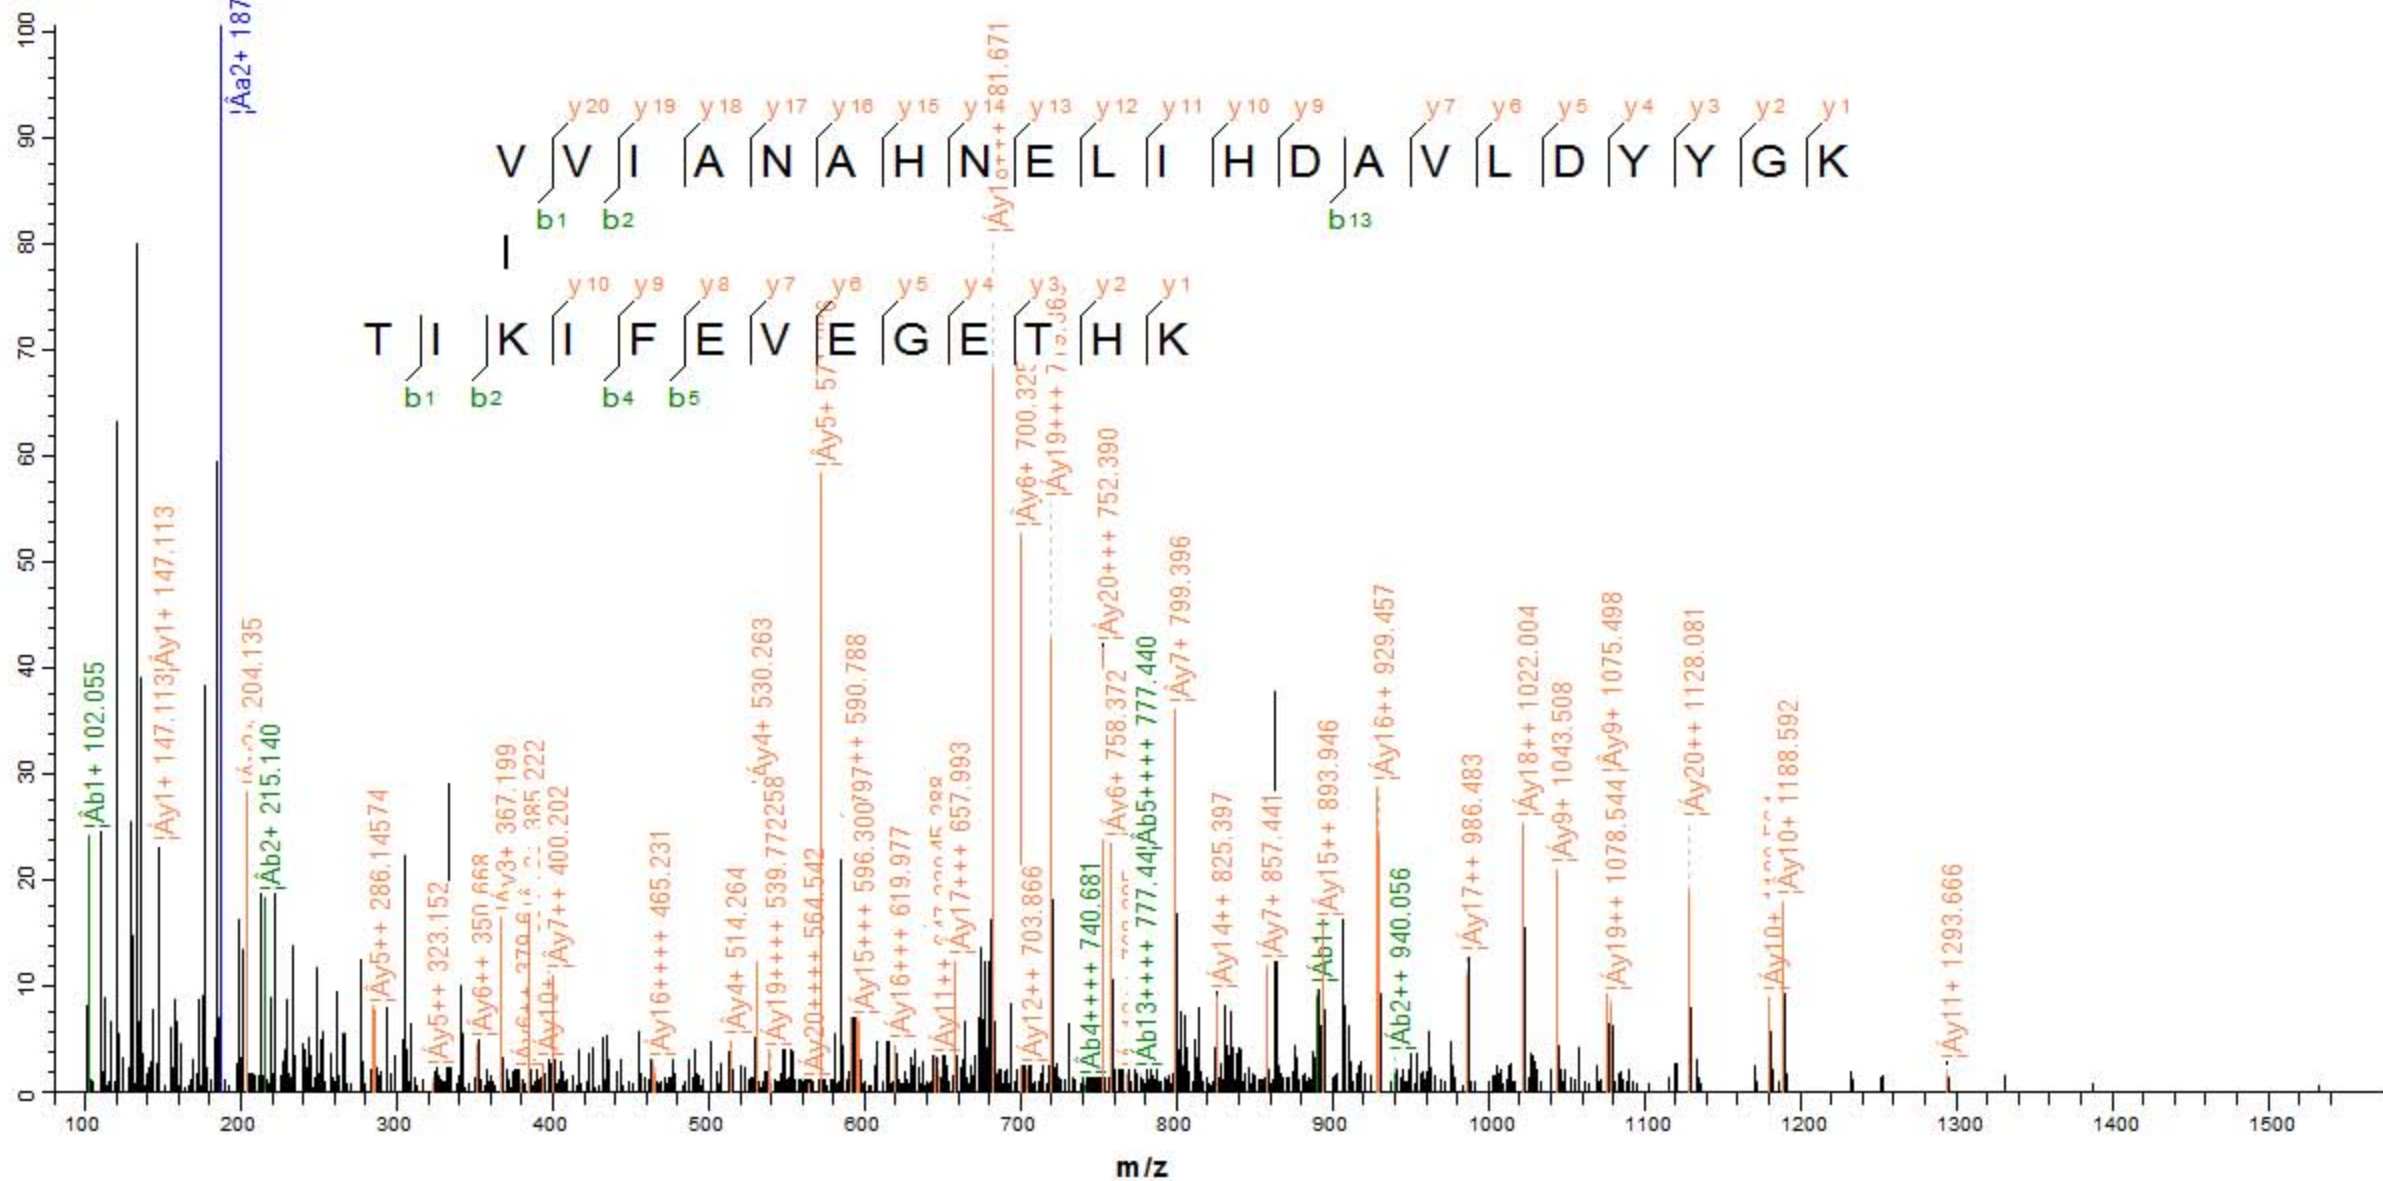

5.4e+004

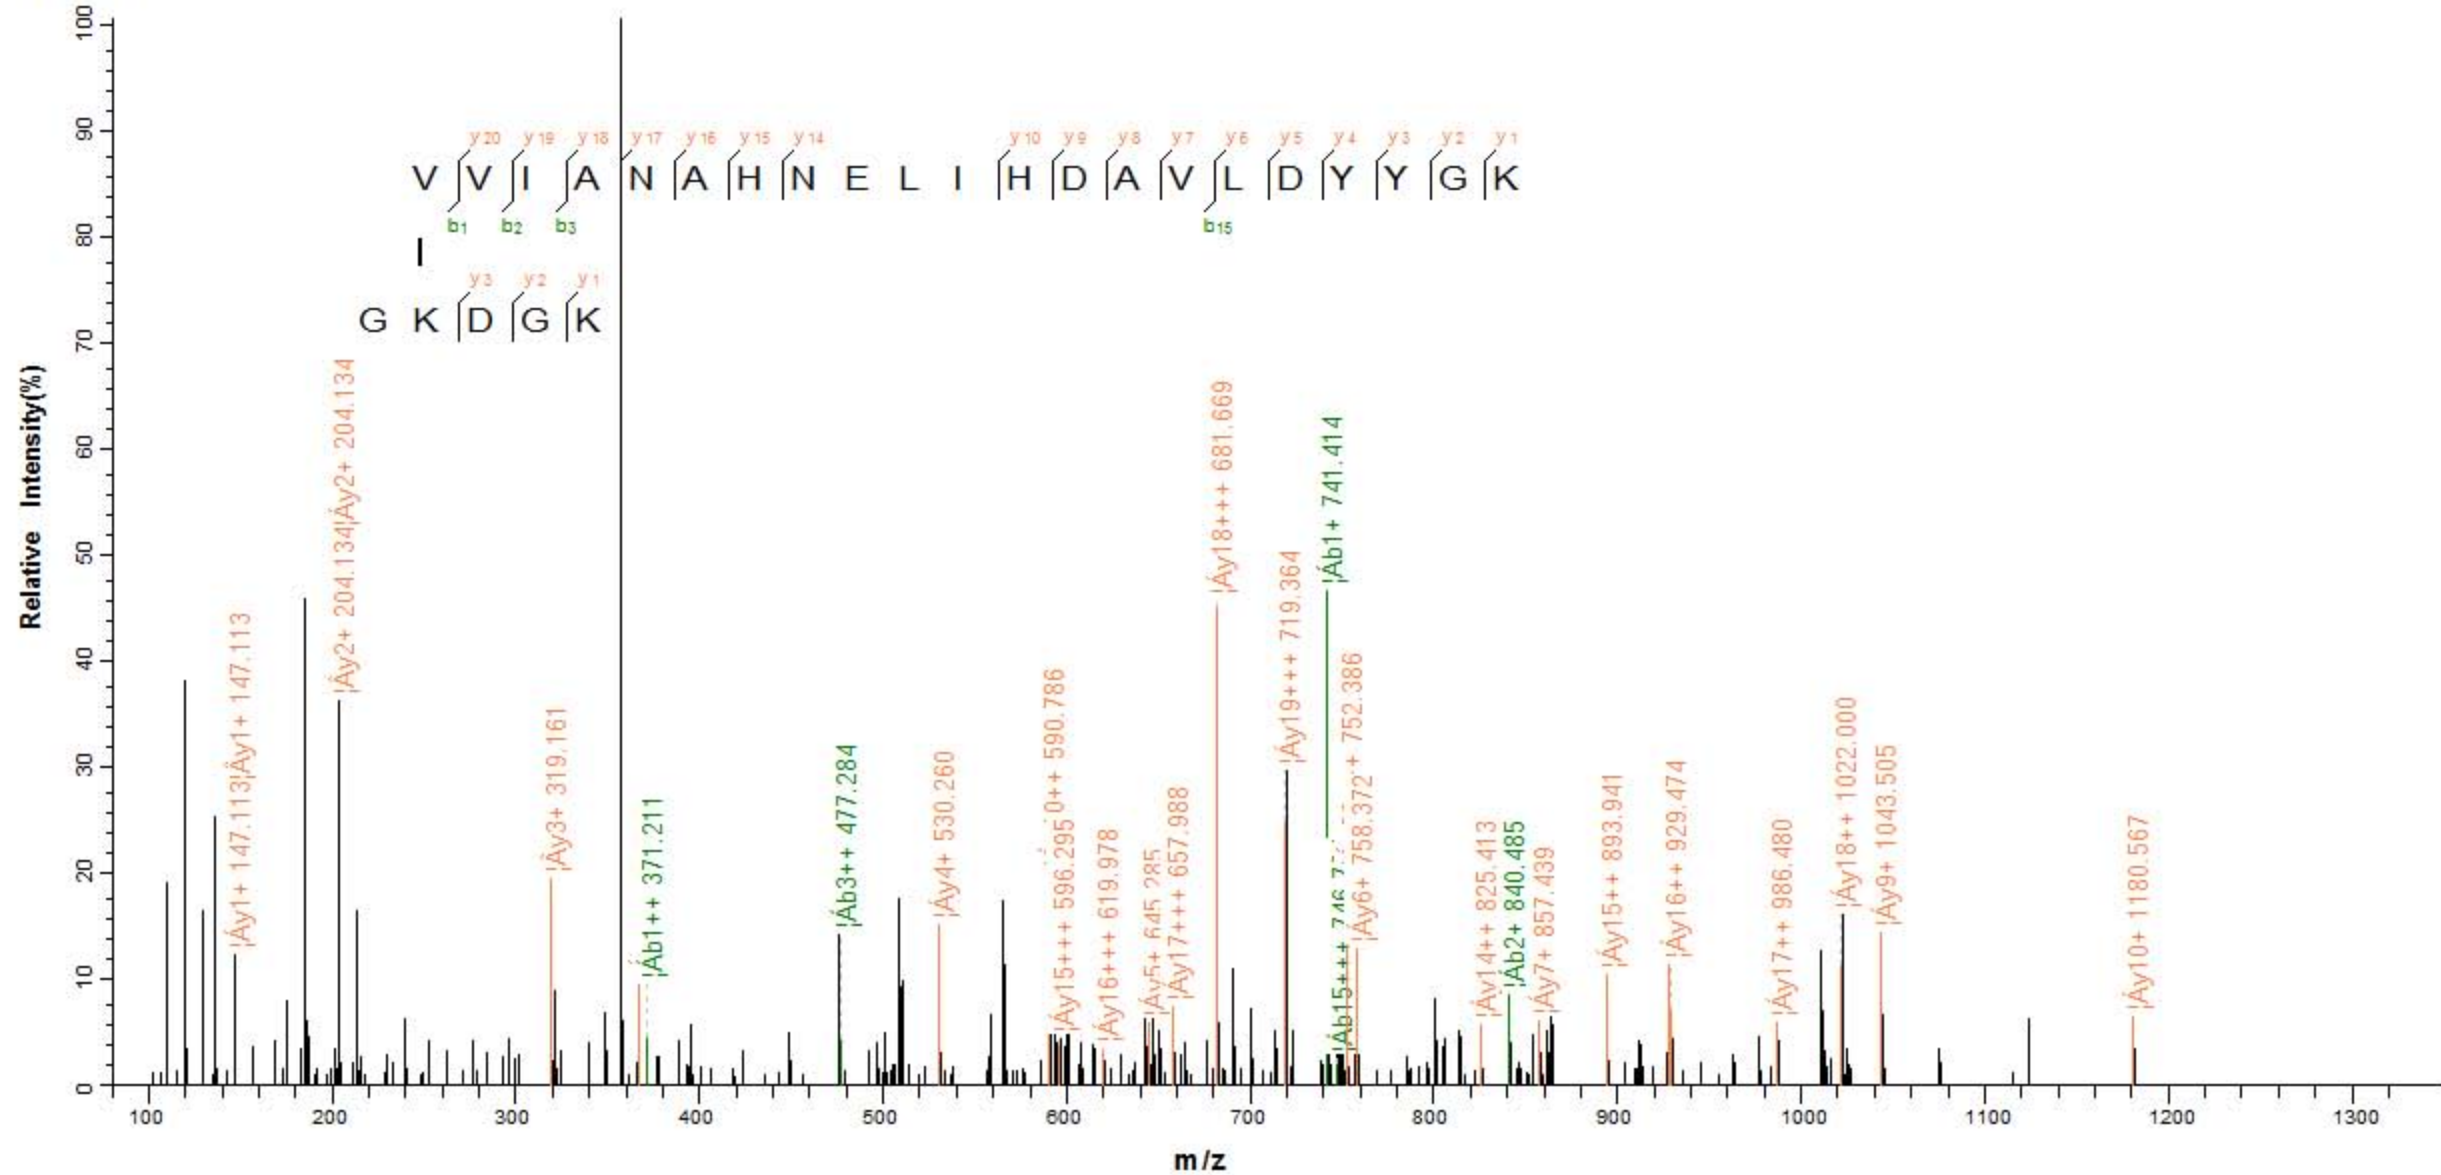

2.6e+004

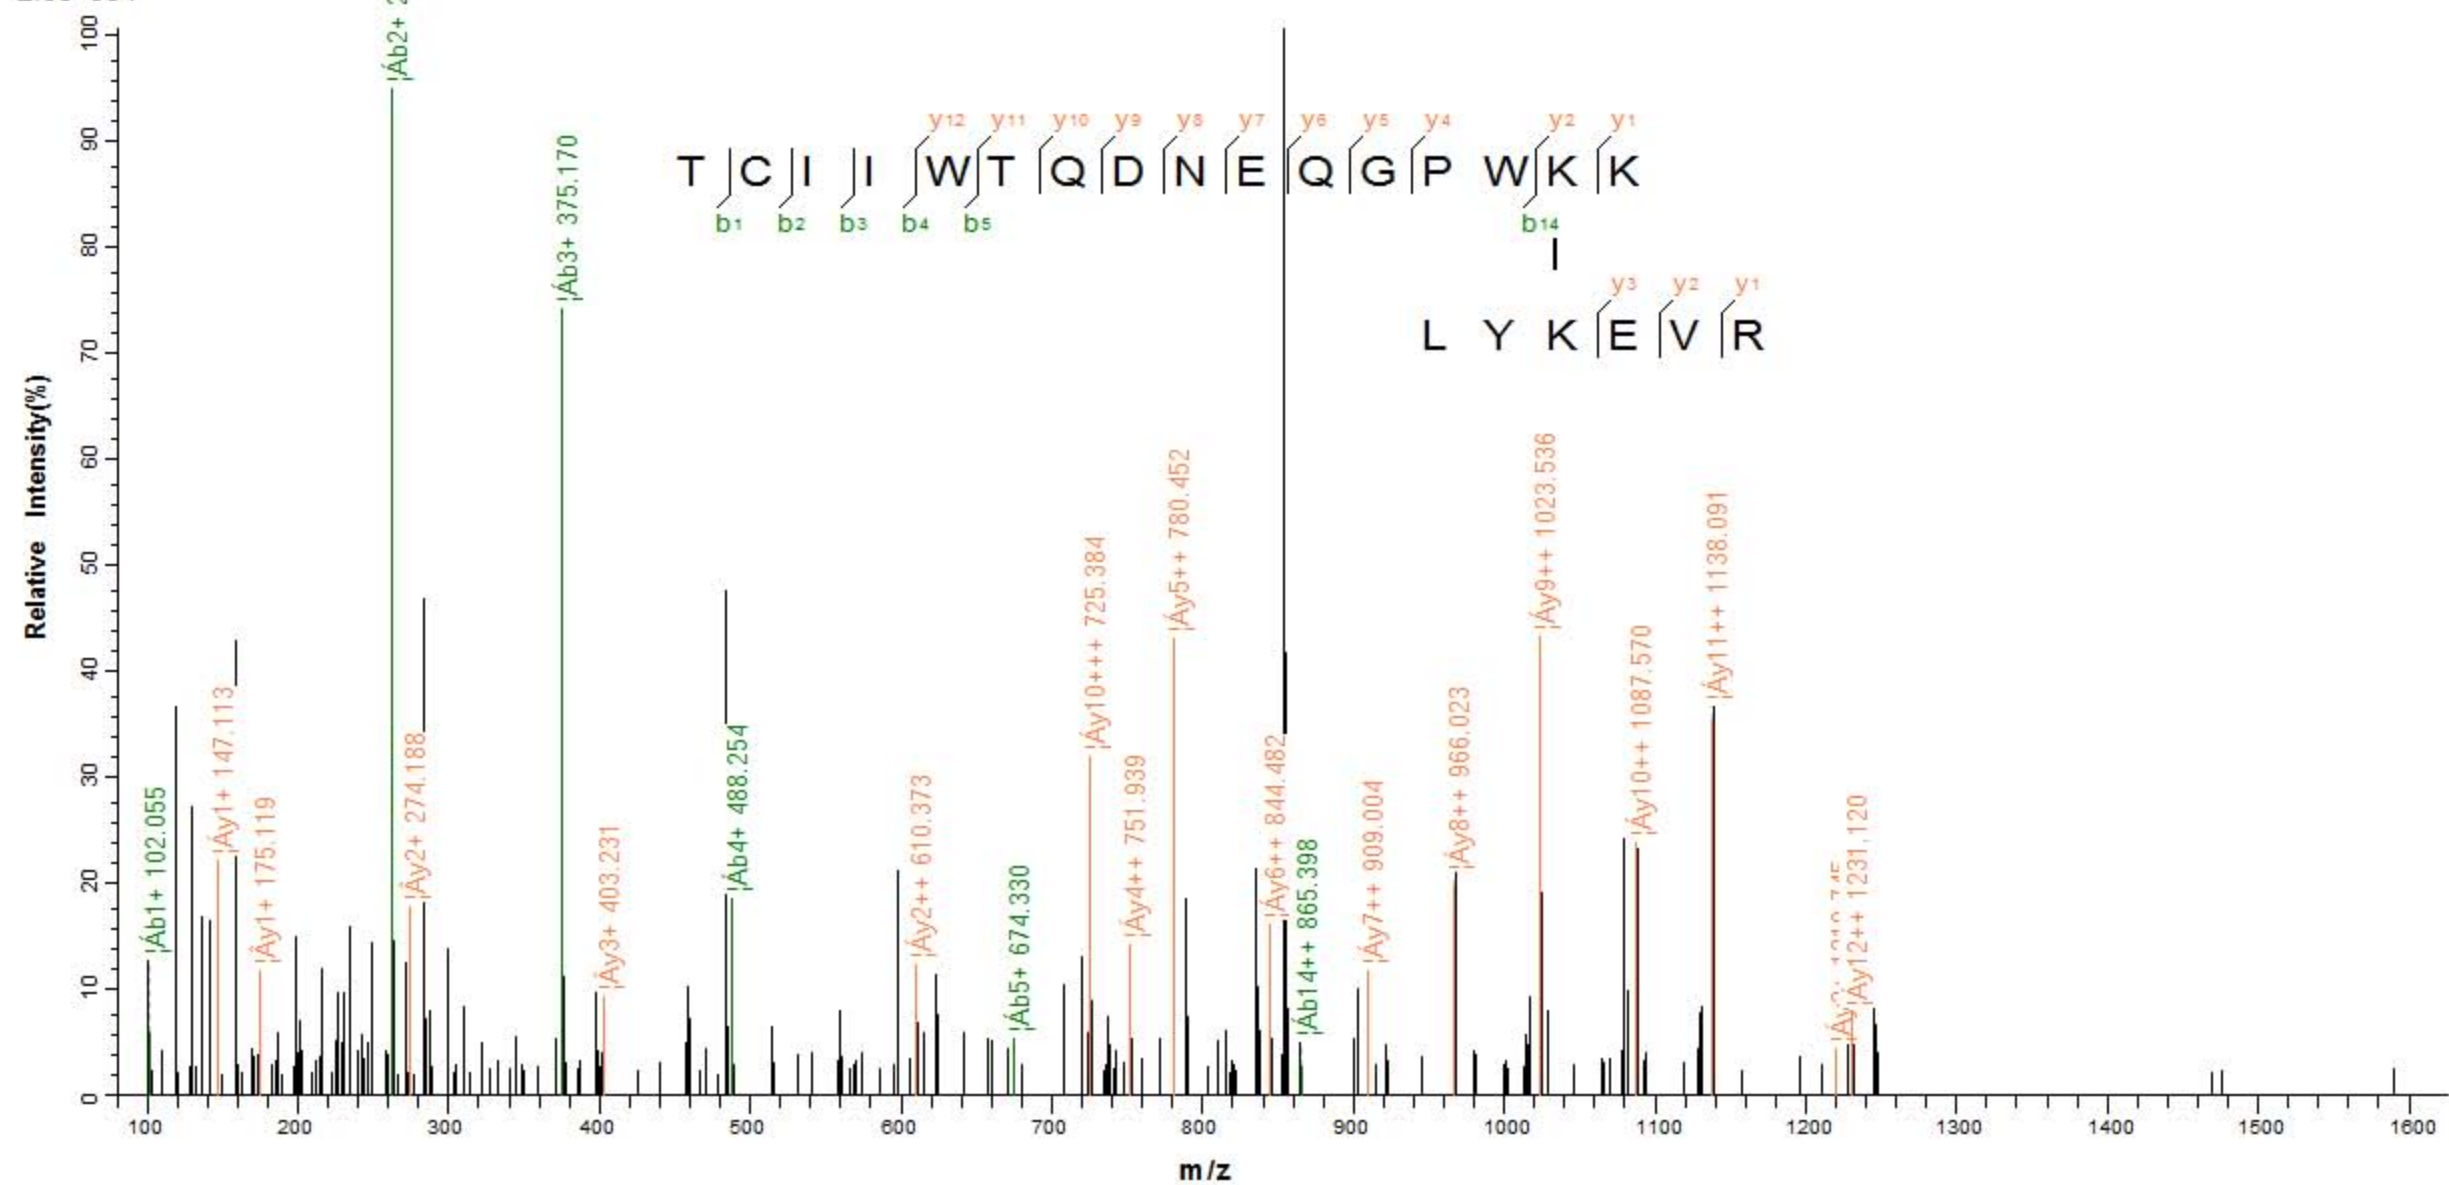

1.8e+004

Relative Intensity(%)

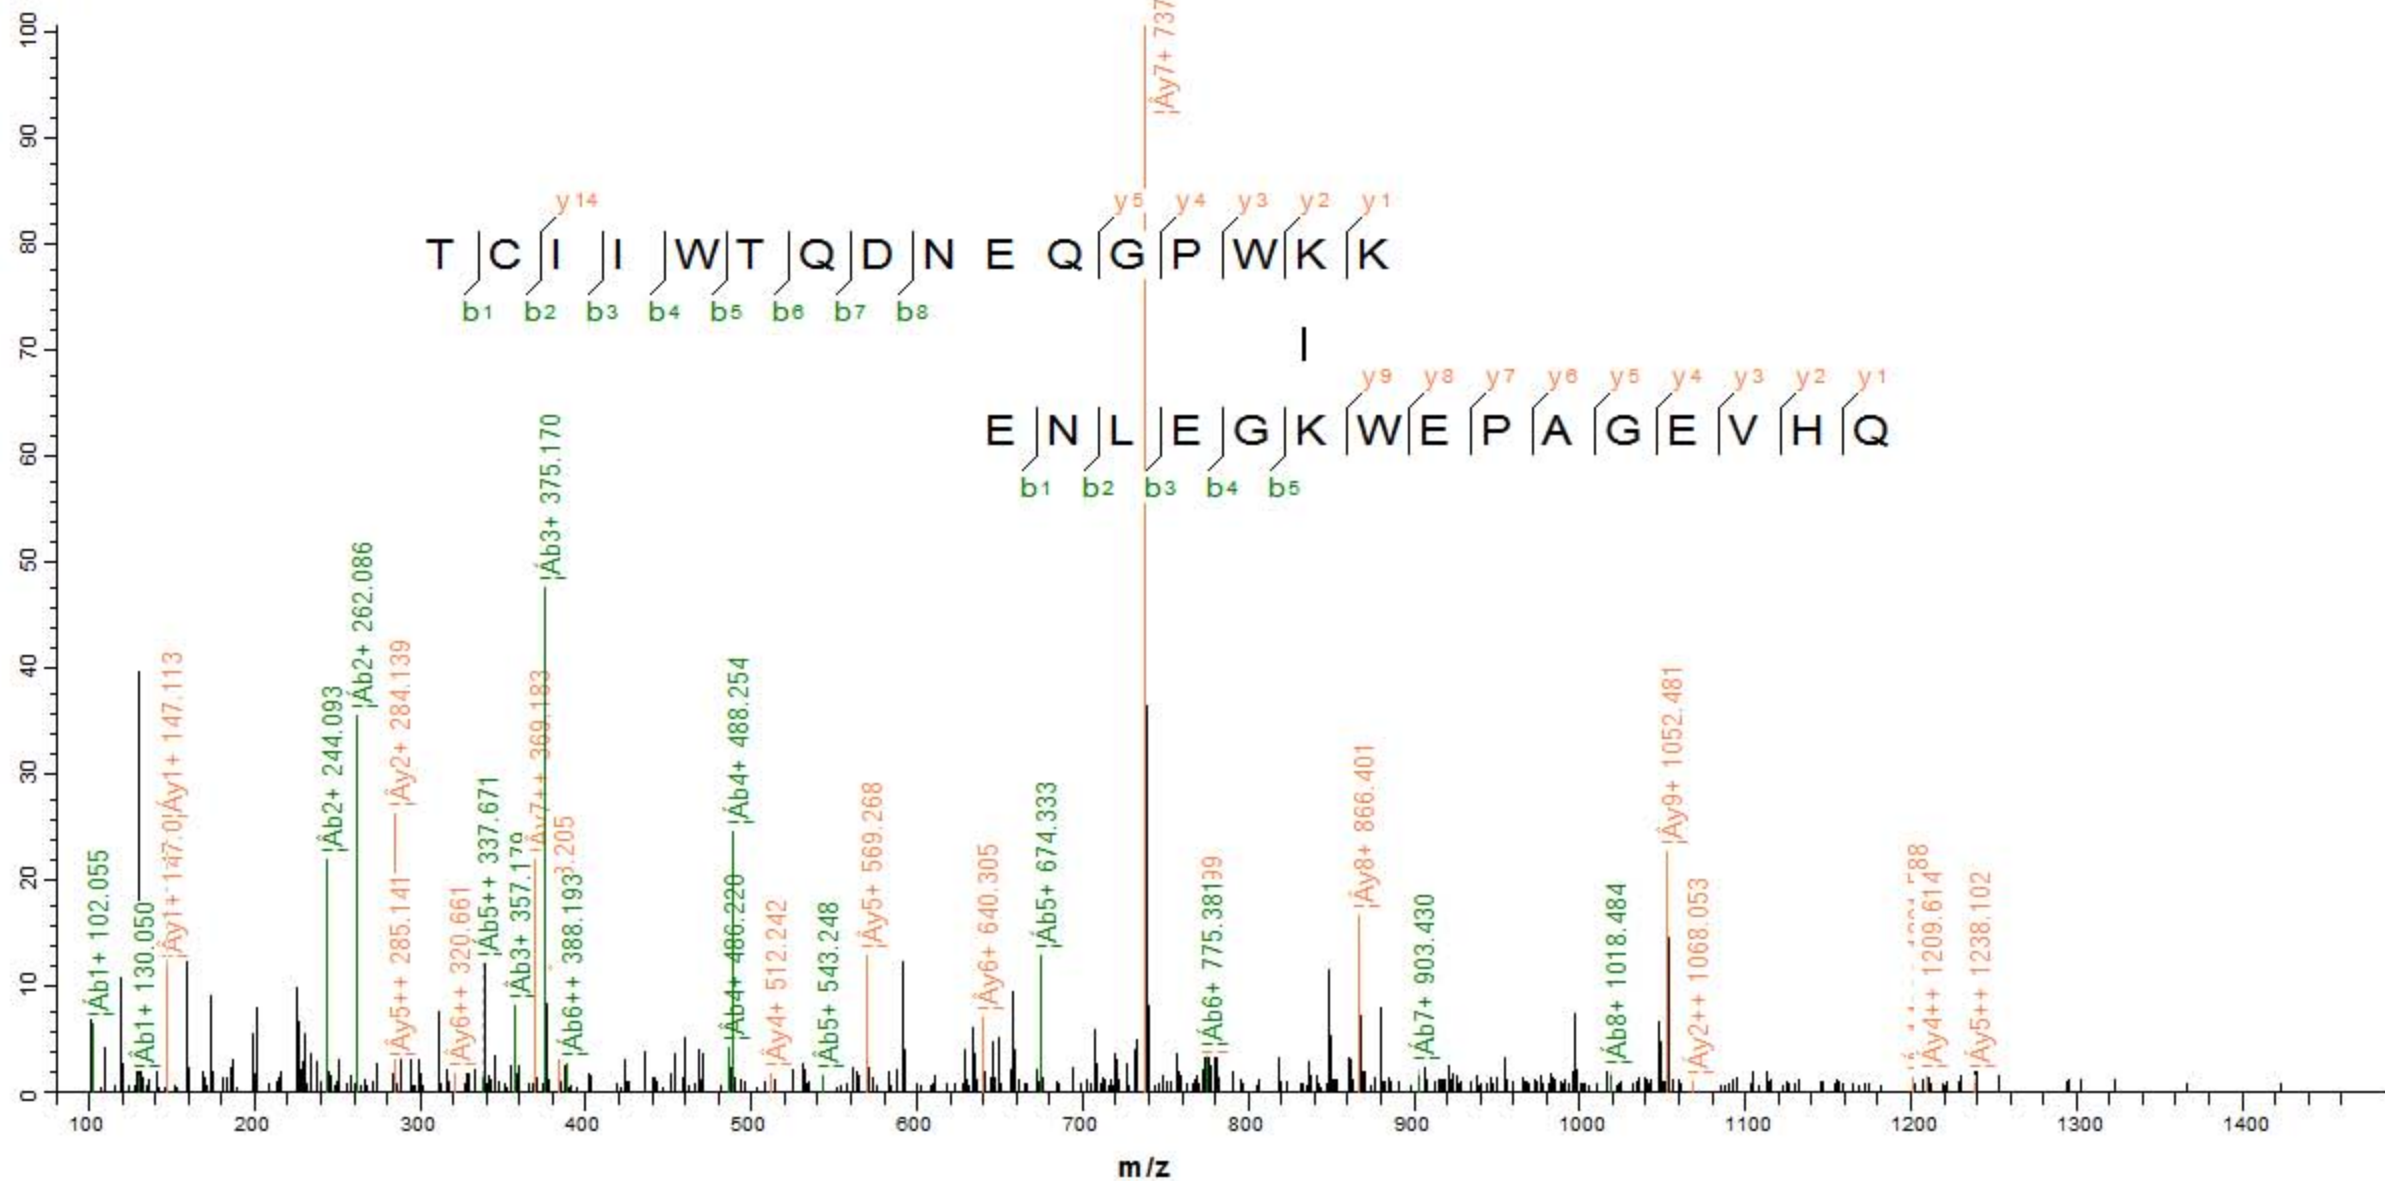

1.2e+004

Relative Intensity(%)

K | T | L | L | K | E | E | K  
|  
T | I | D | D | S | N | R  
b1      b3

y7      y5      y4      y3      y2      y1  
y6      y5      y3      y1

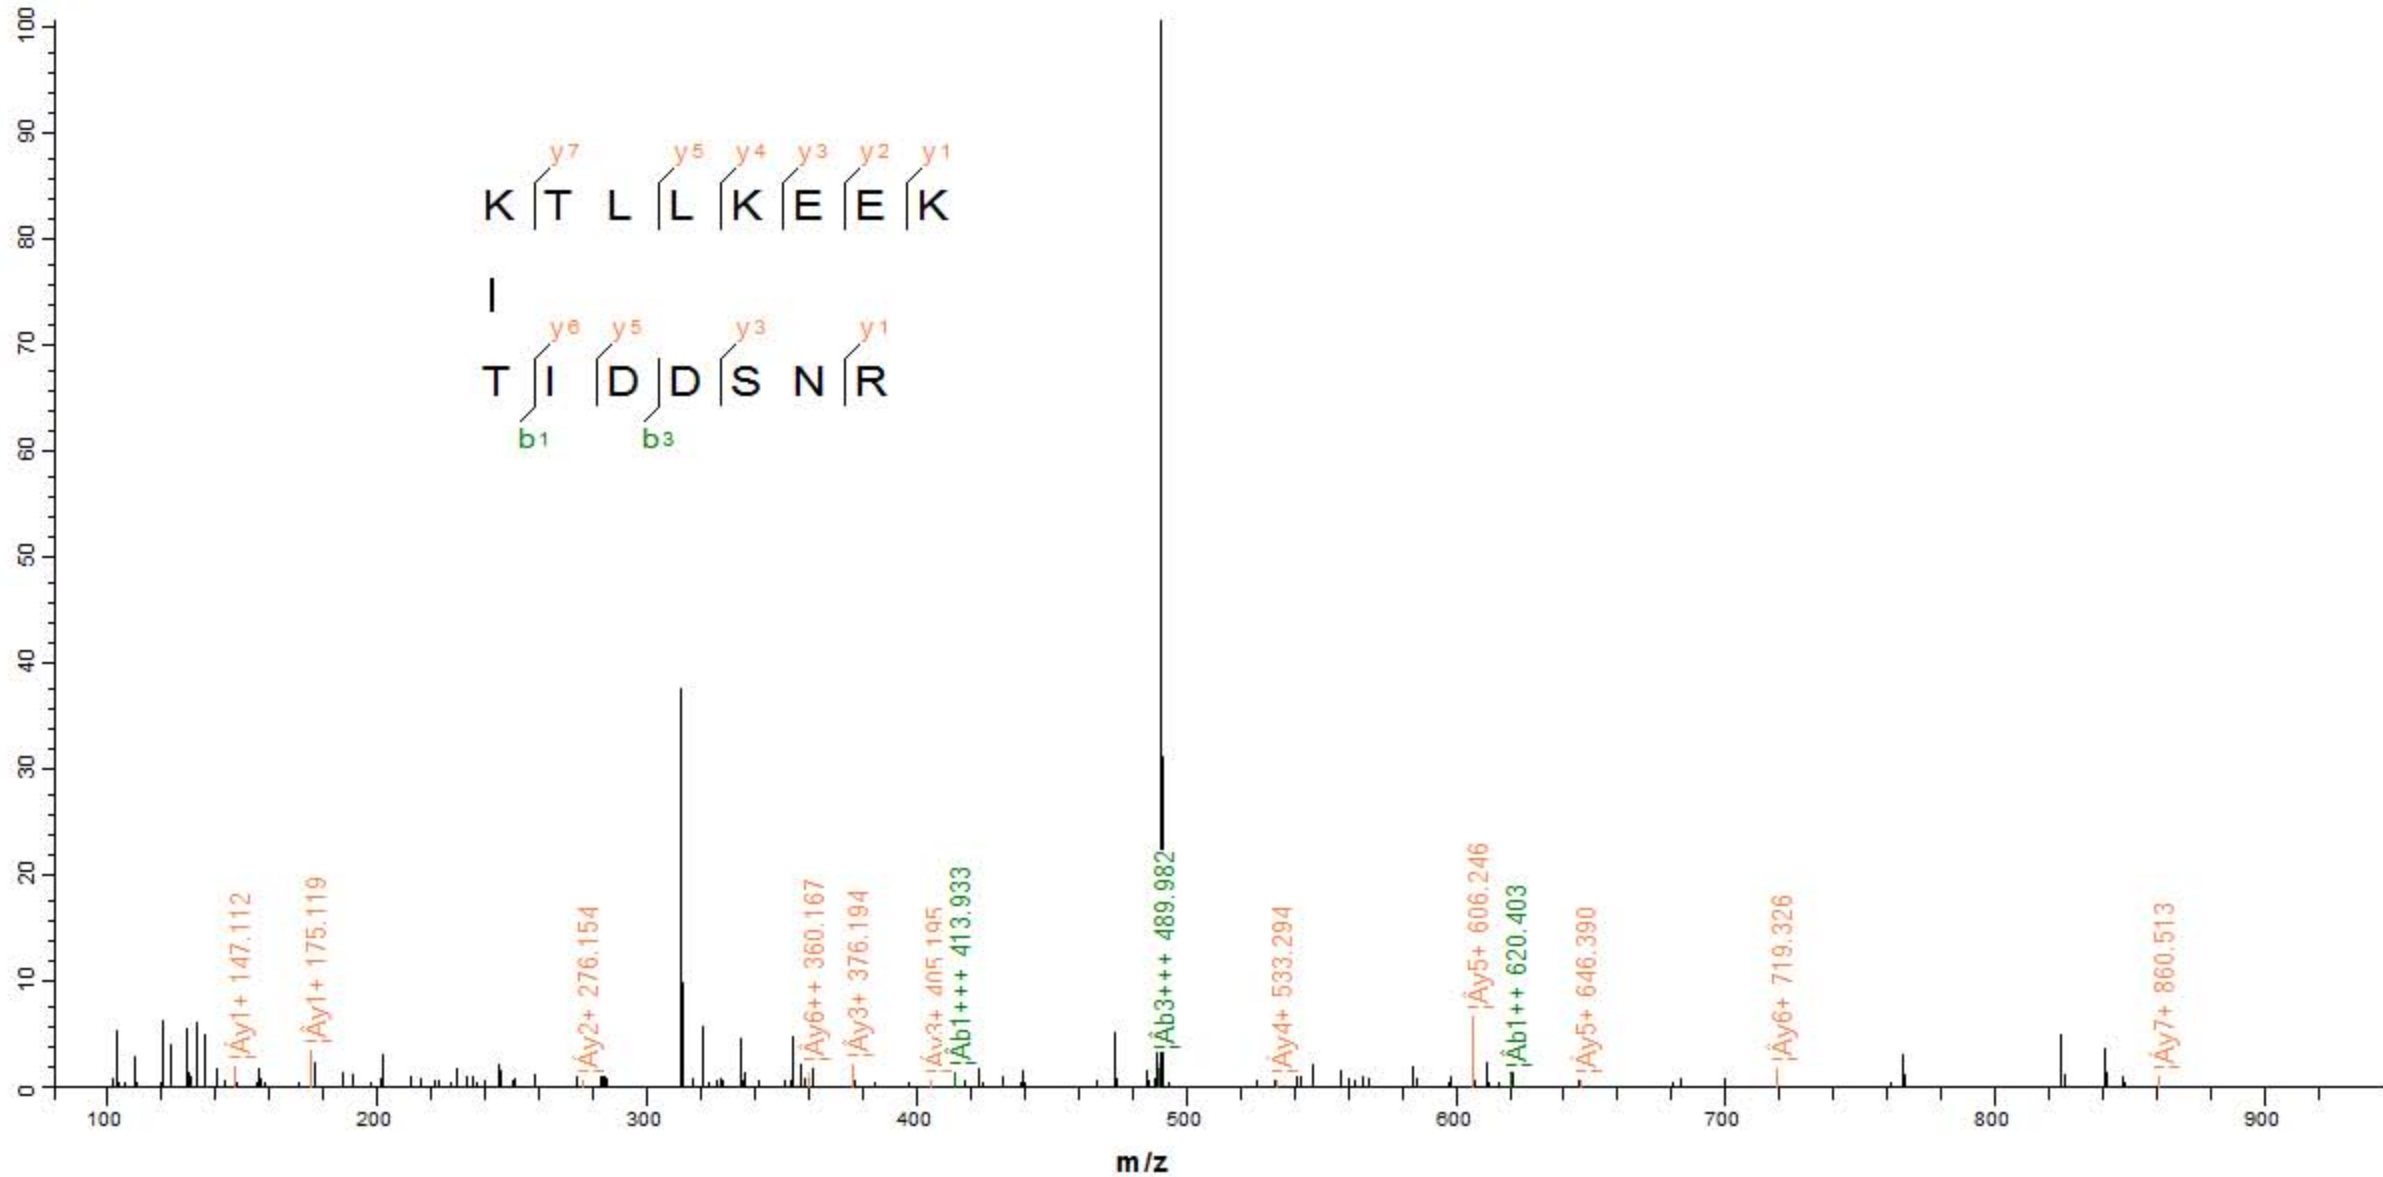

3.9e+003

Relative Intensity(%)

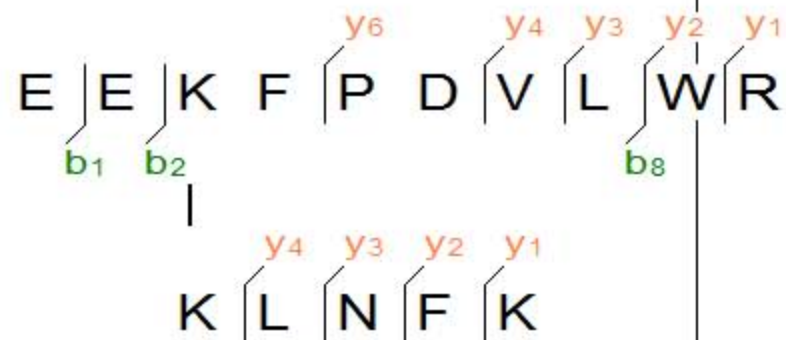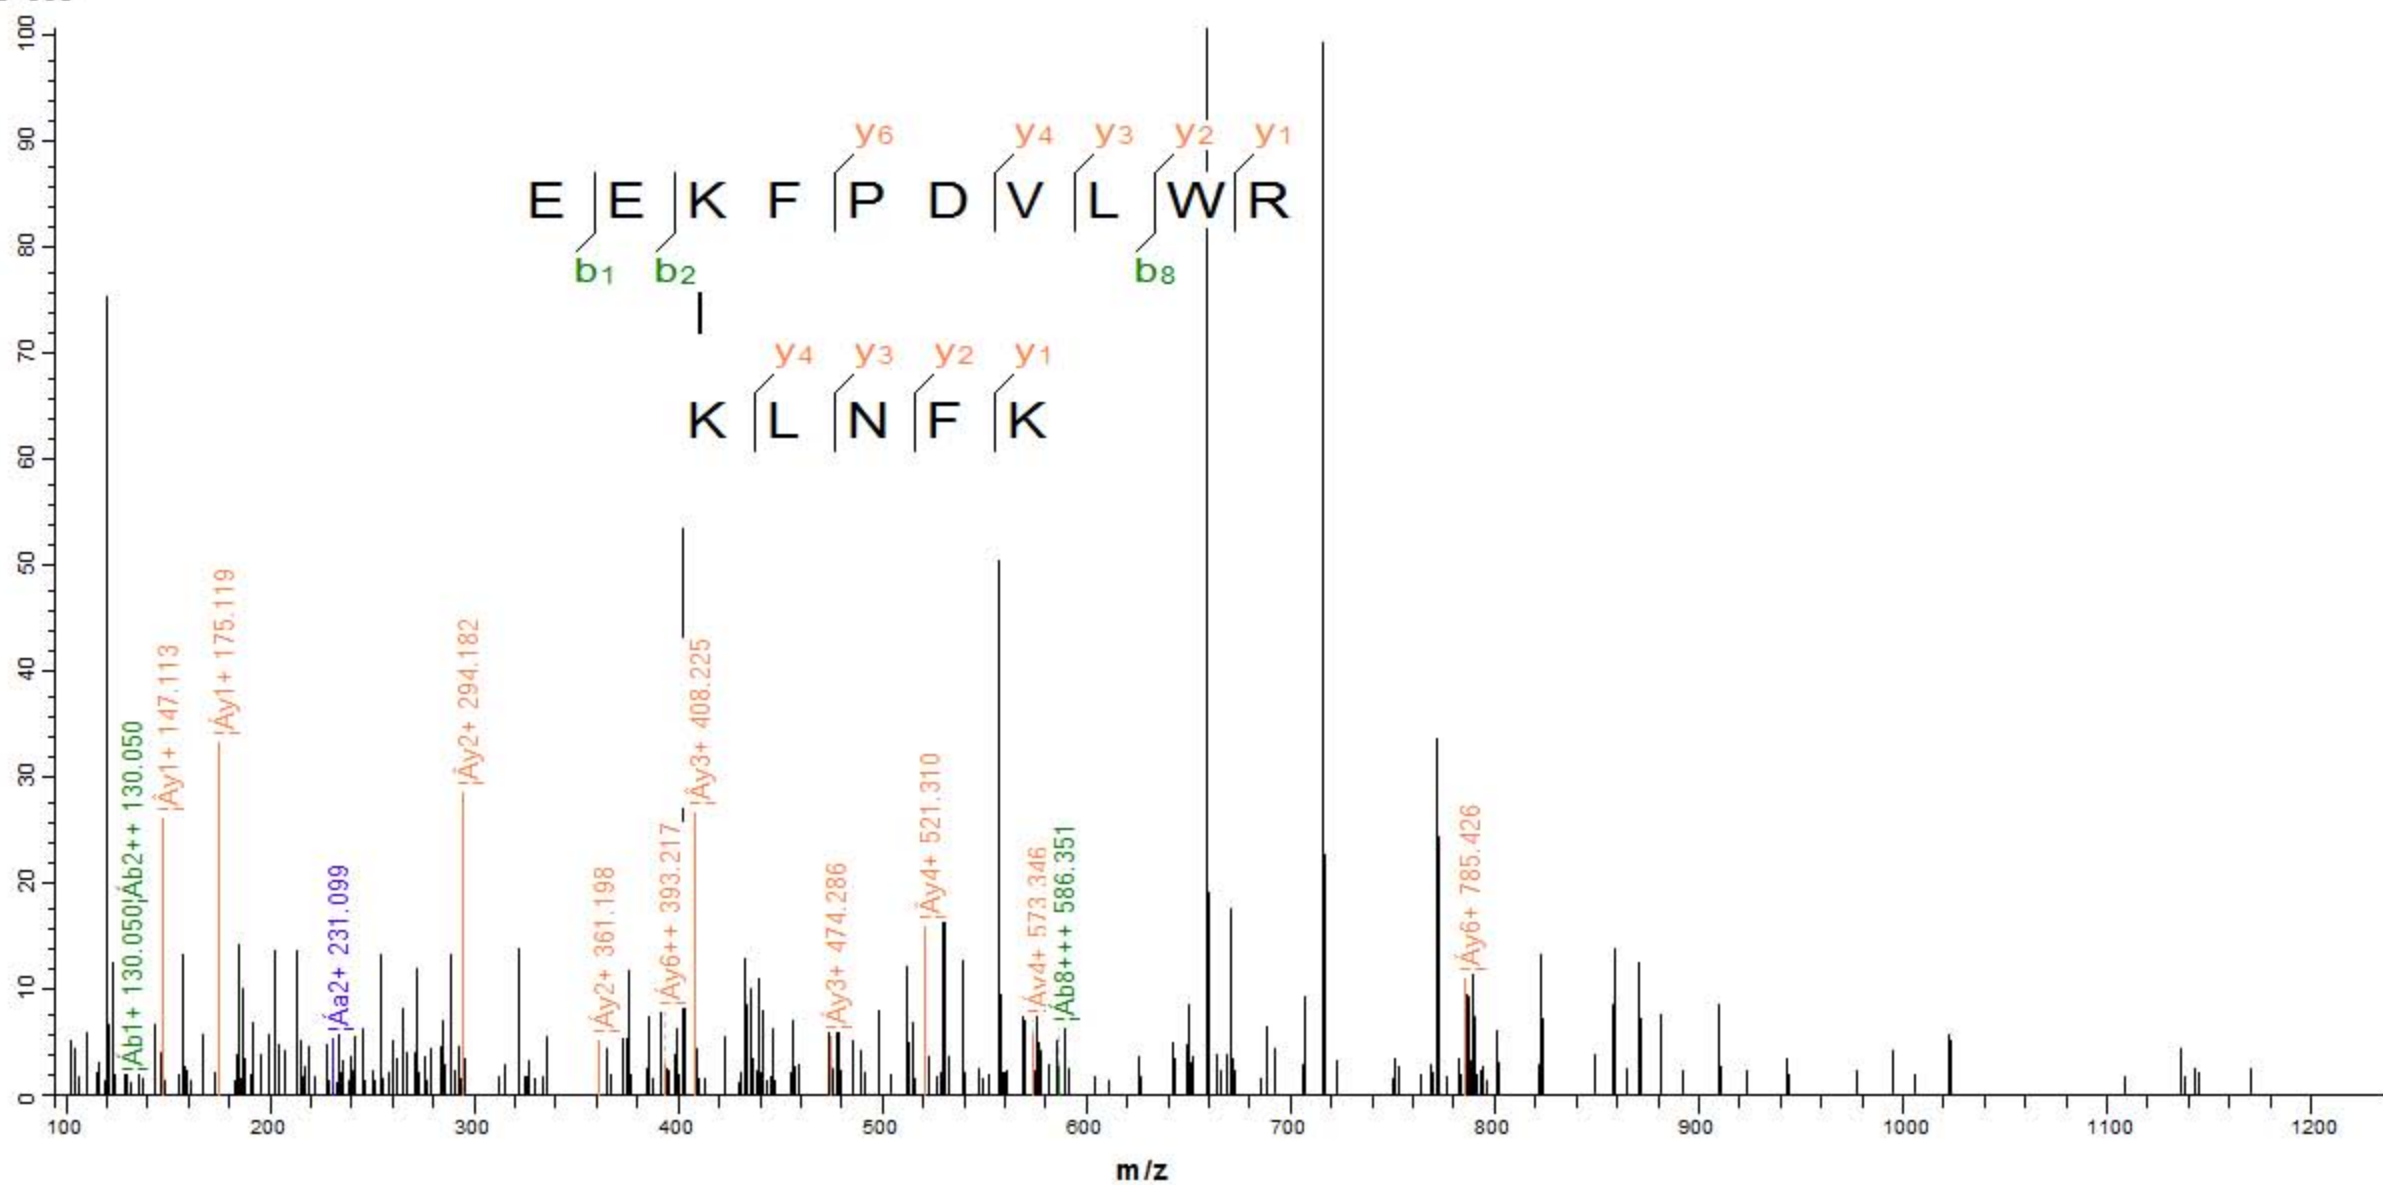

3.4e+006

Relative Intensity(%)

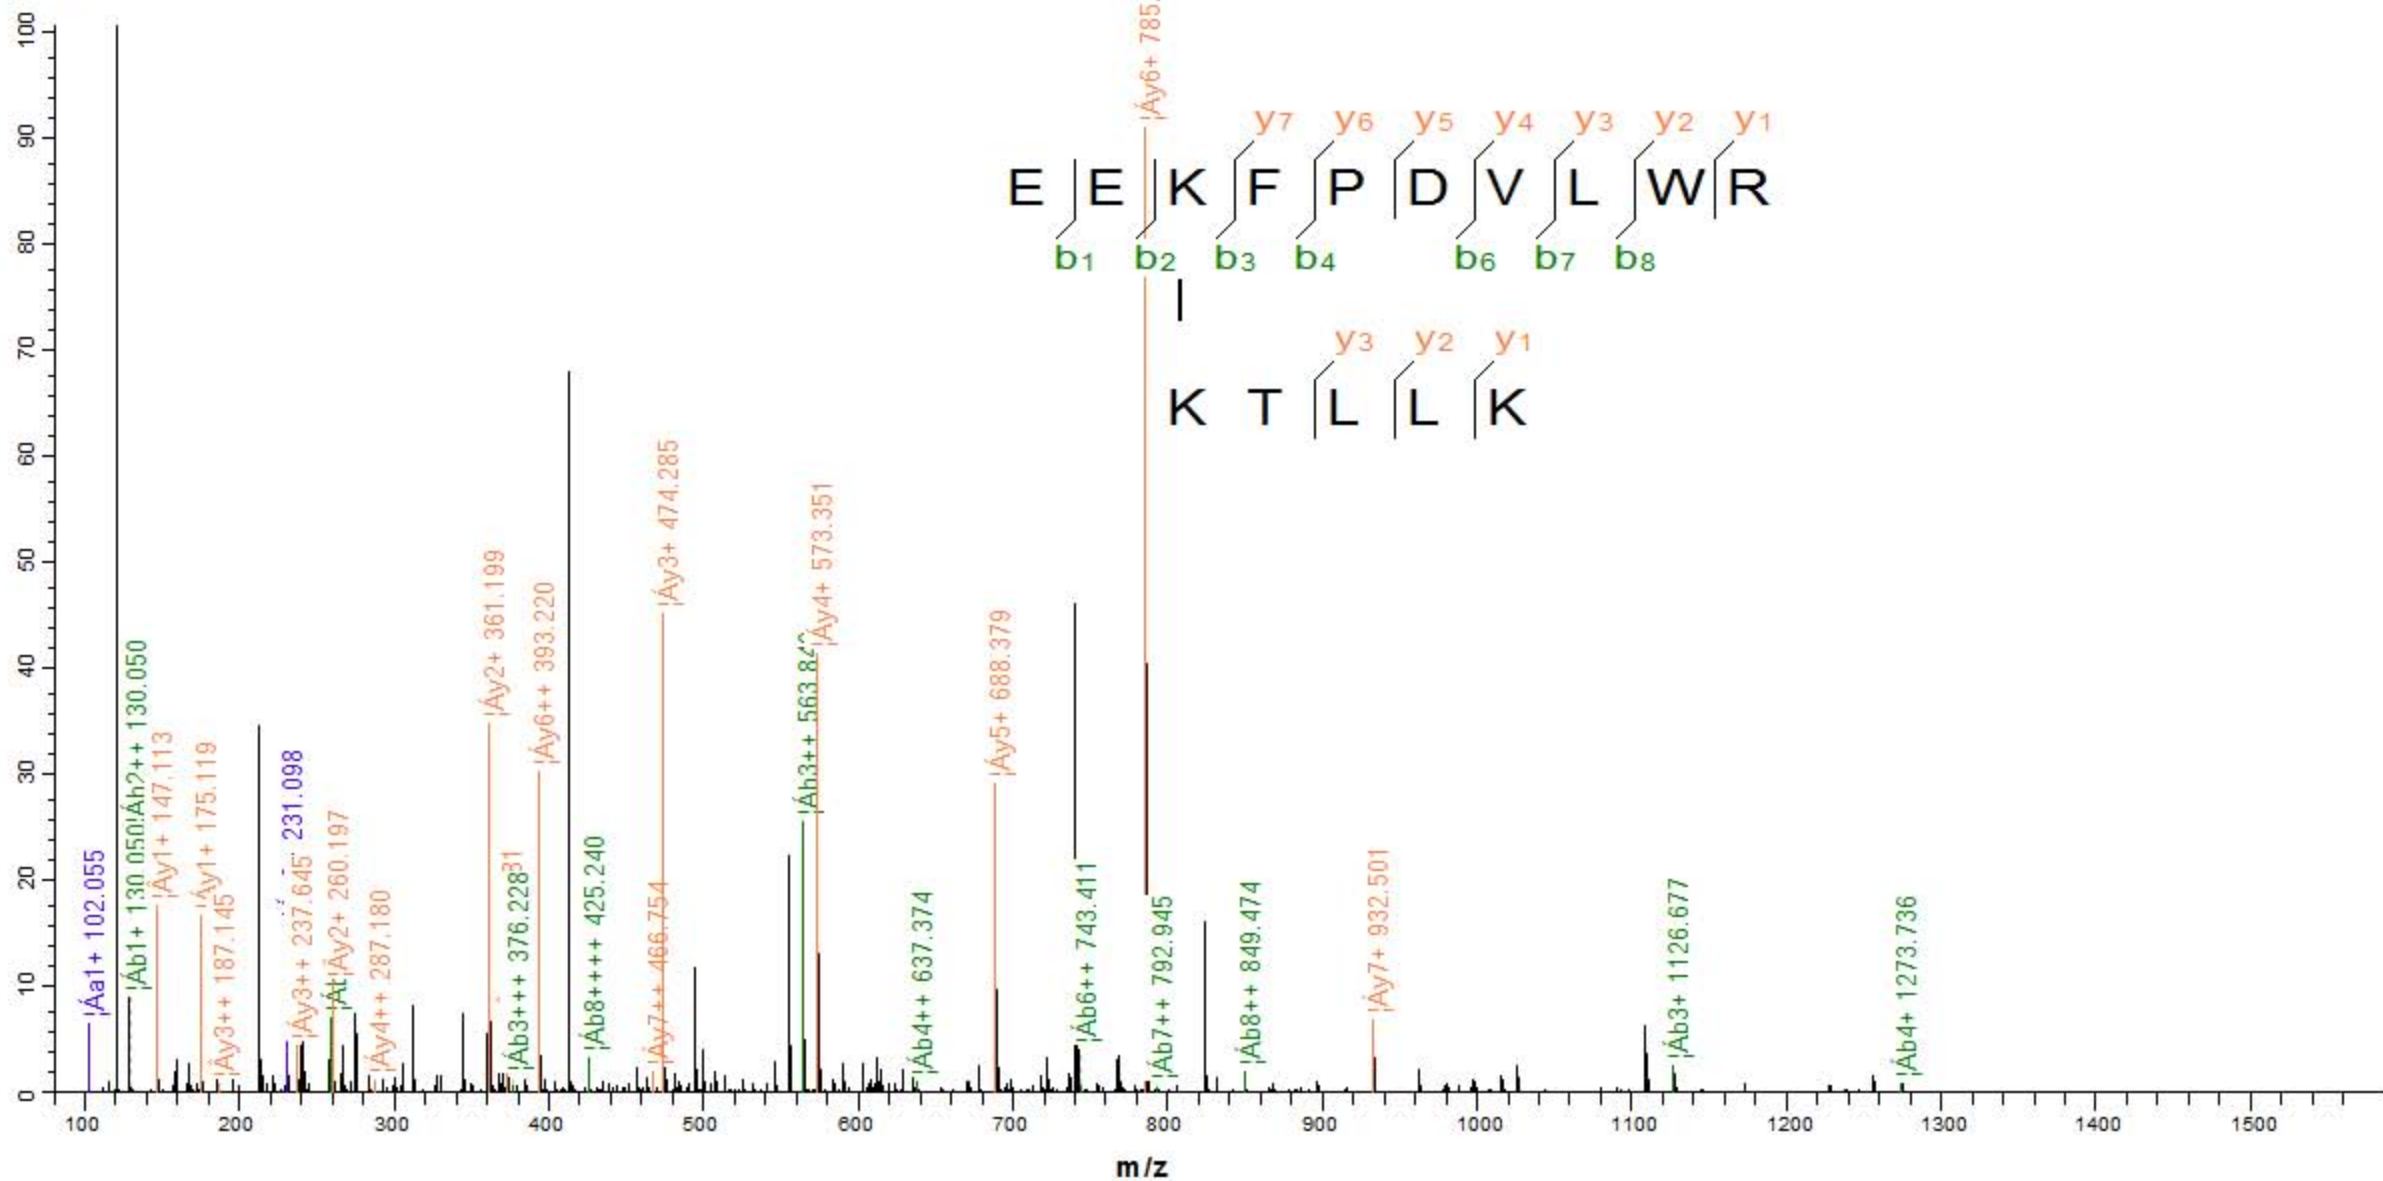



3.1e+004

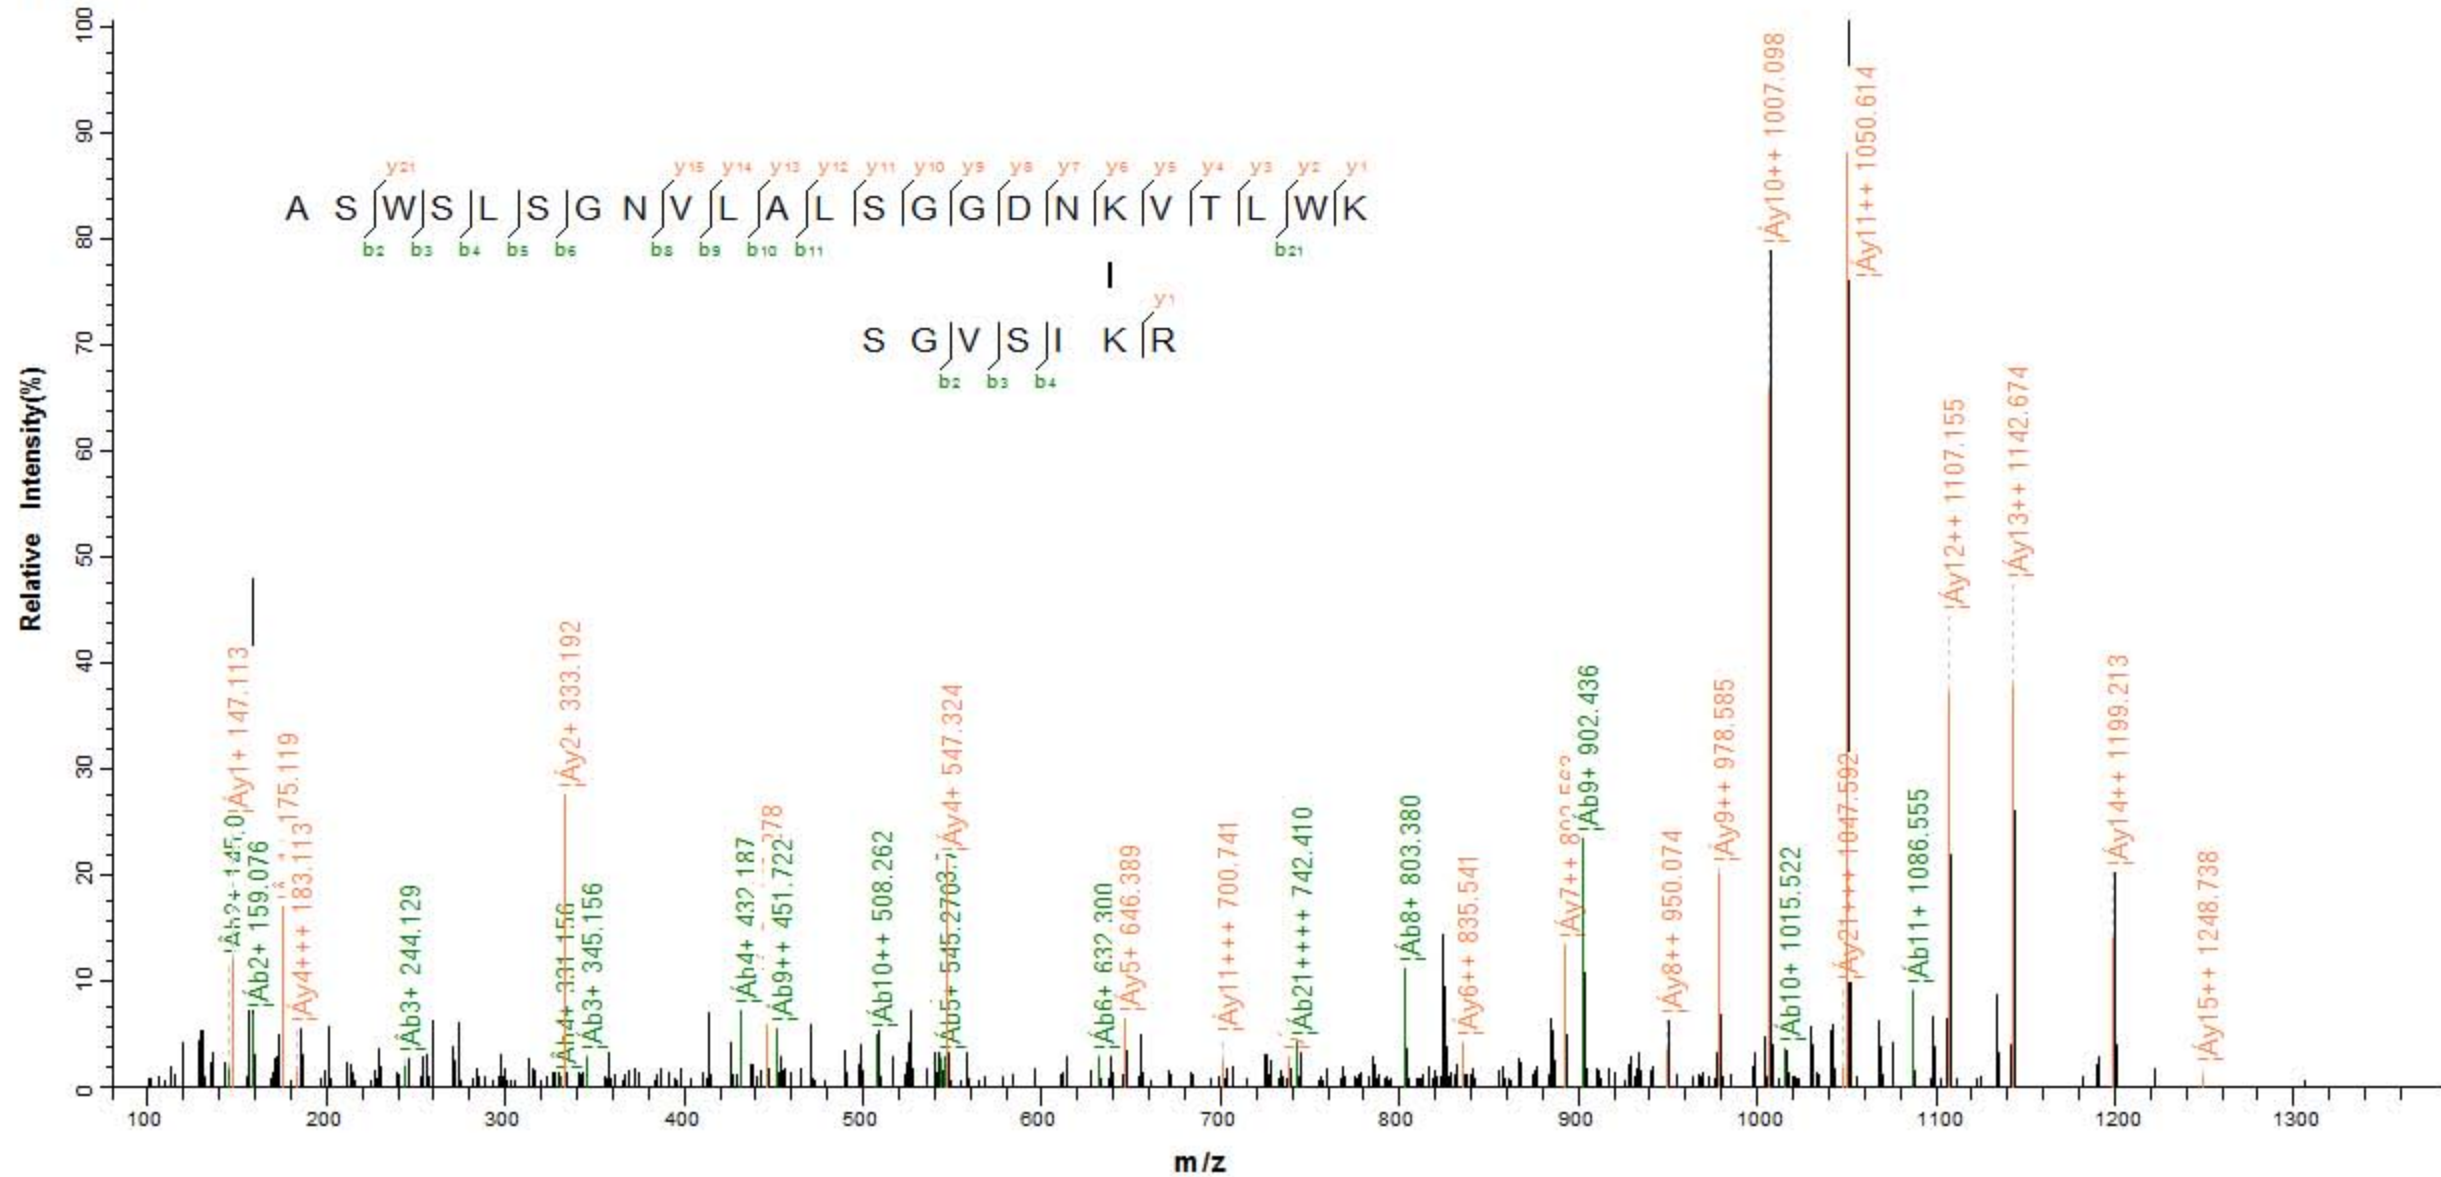

4.6e+004

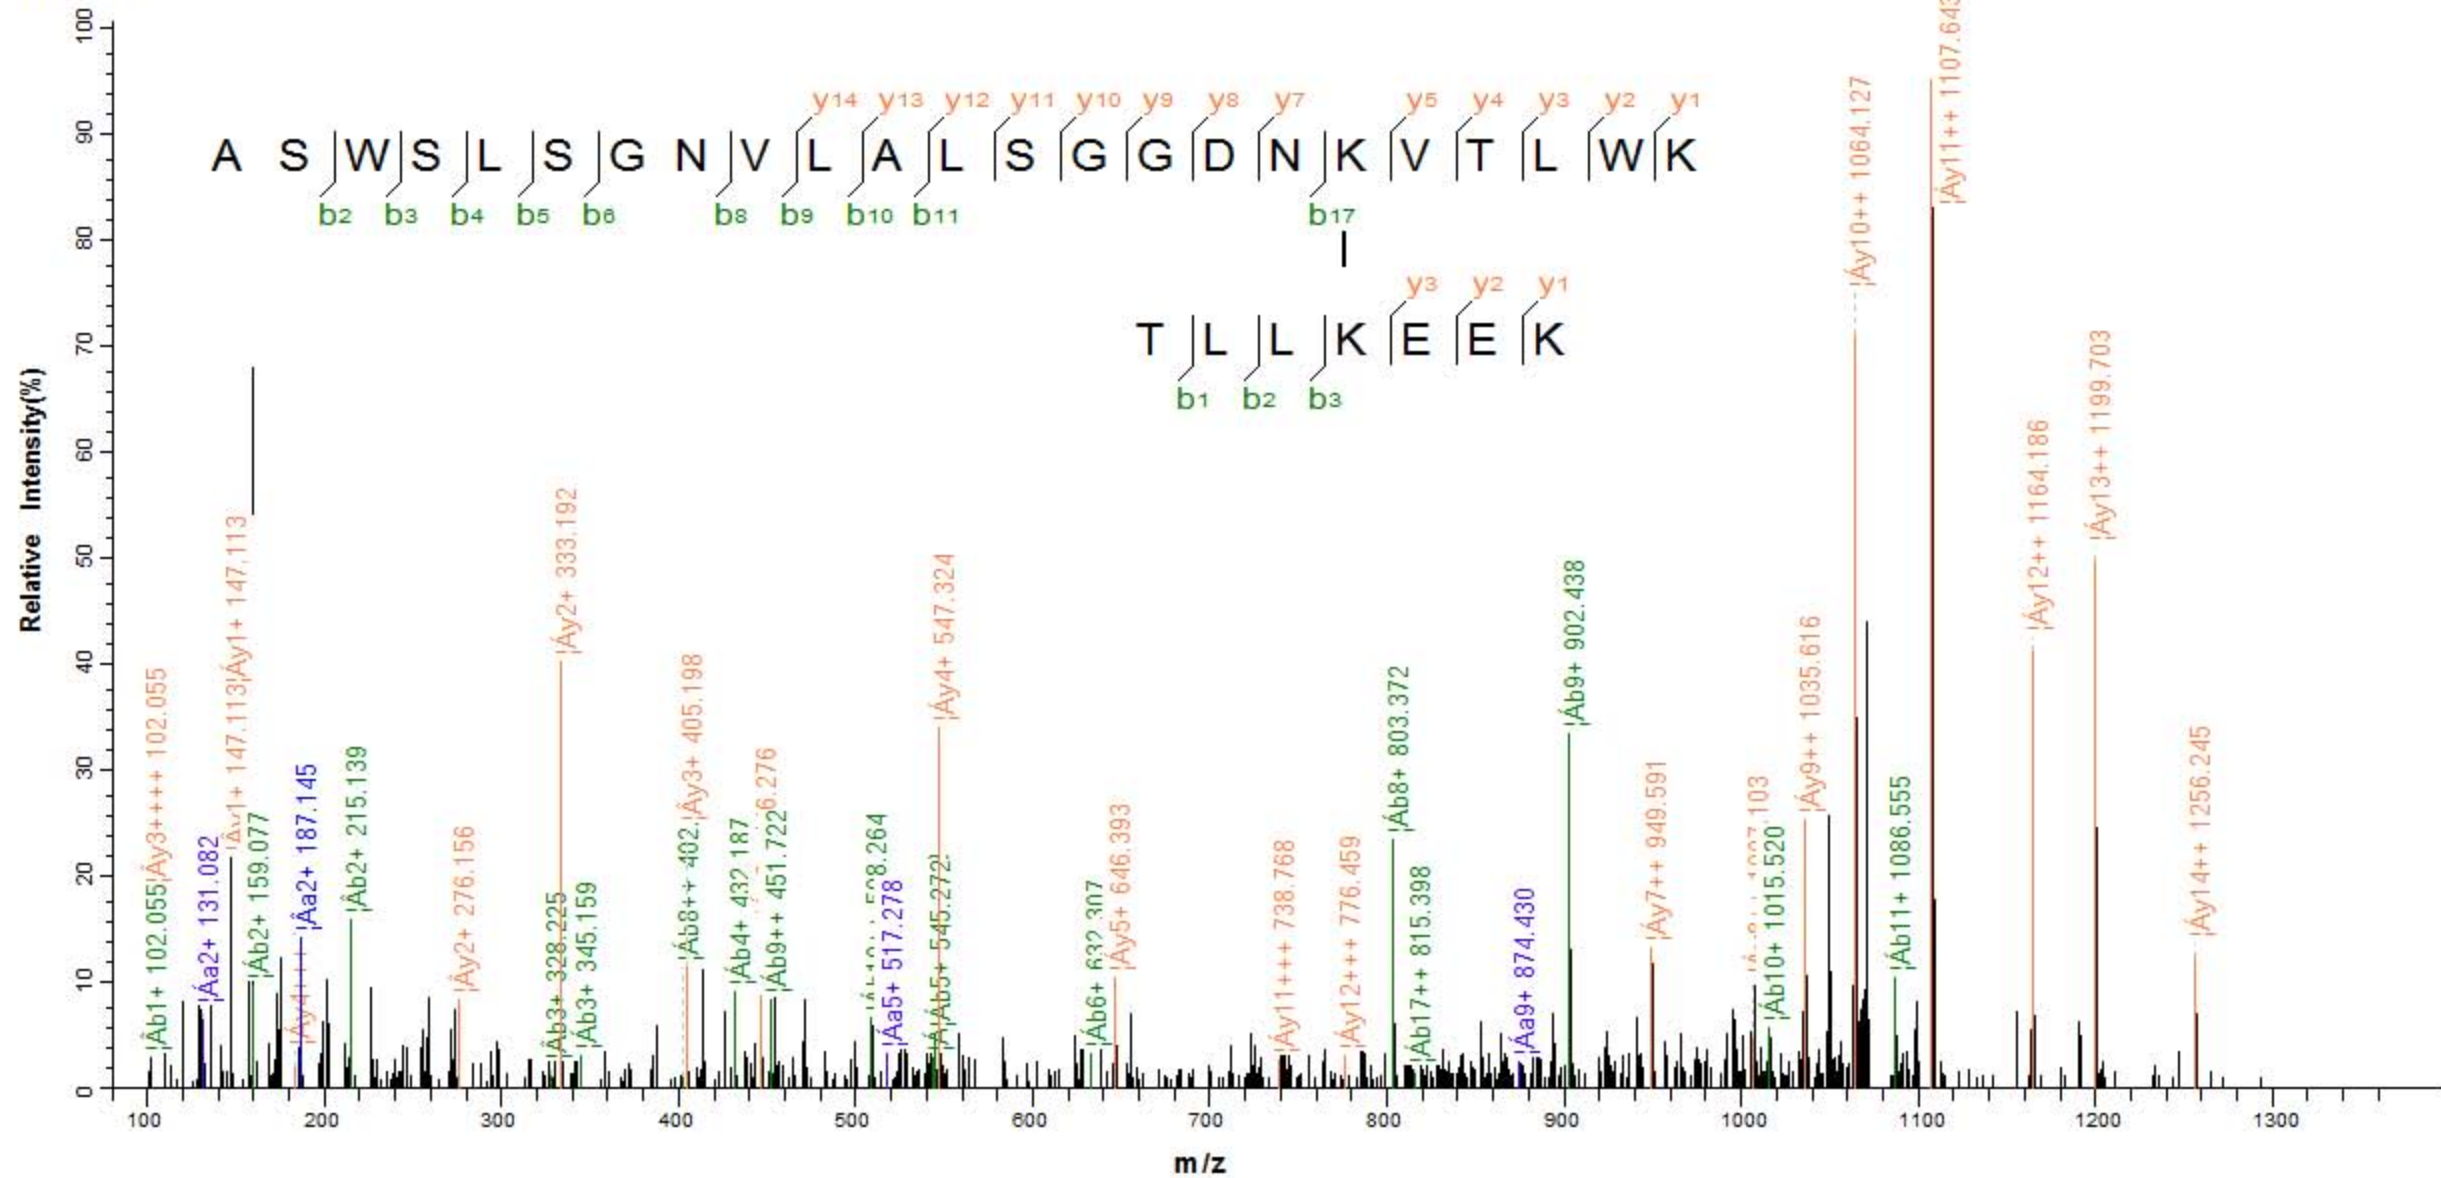

2.7e+004

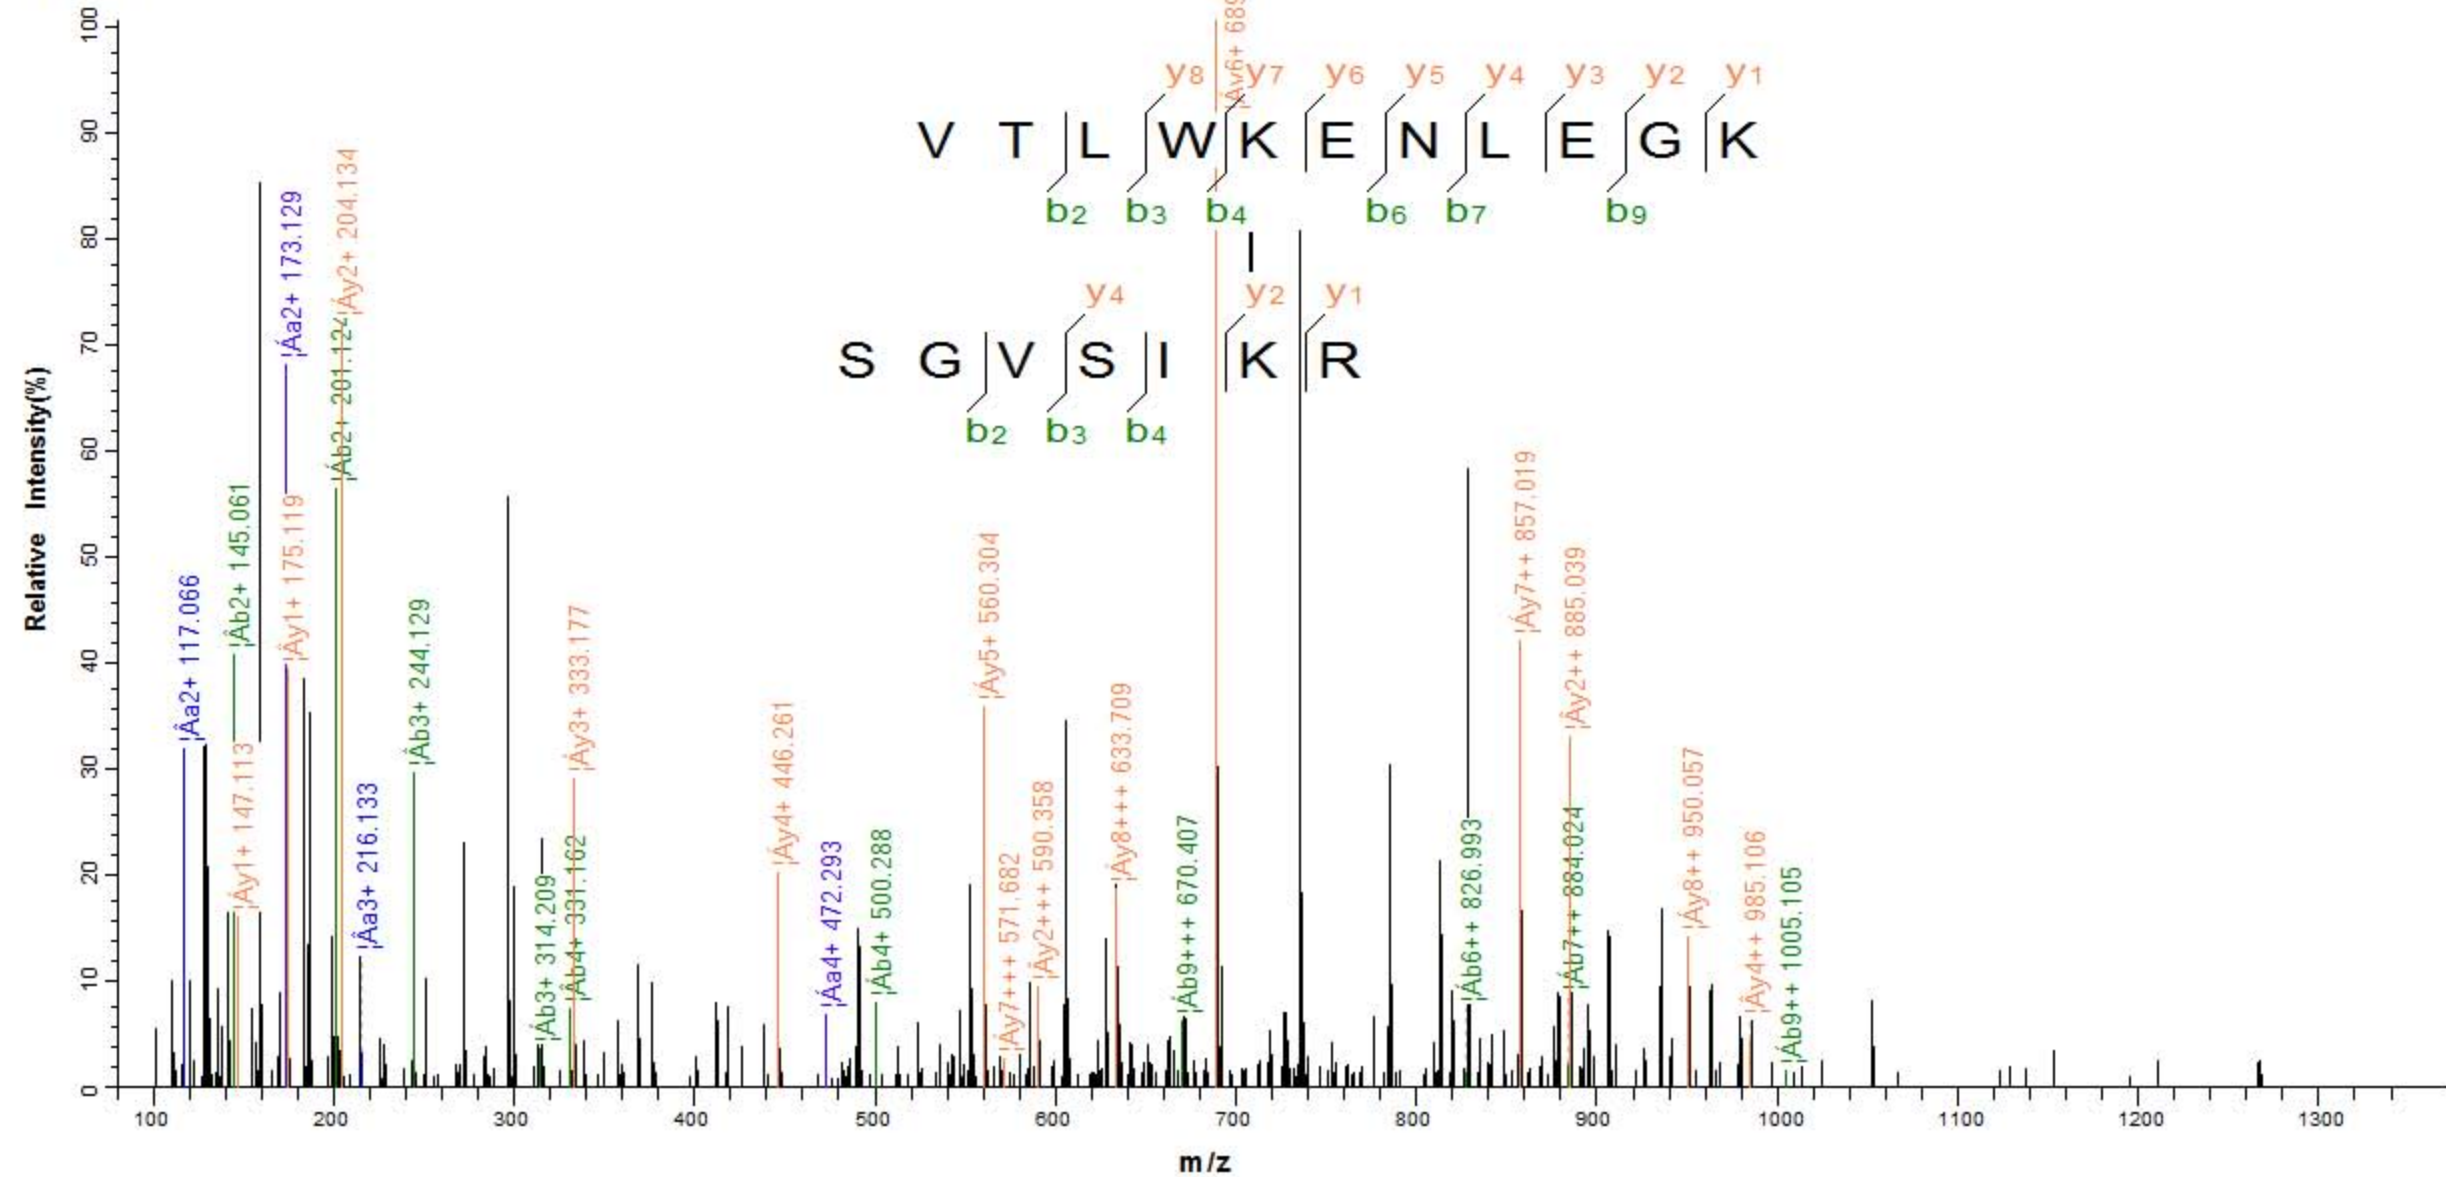

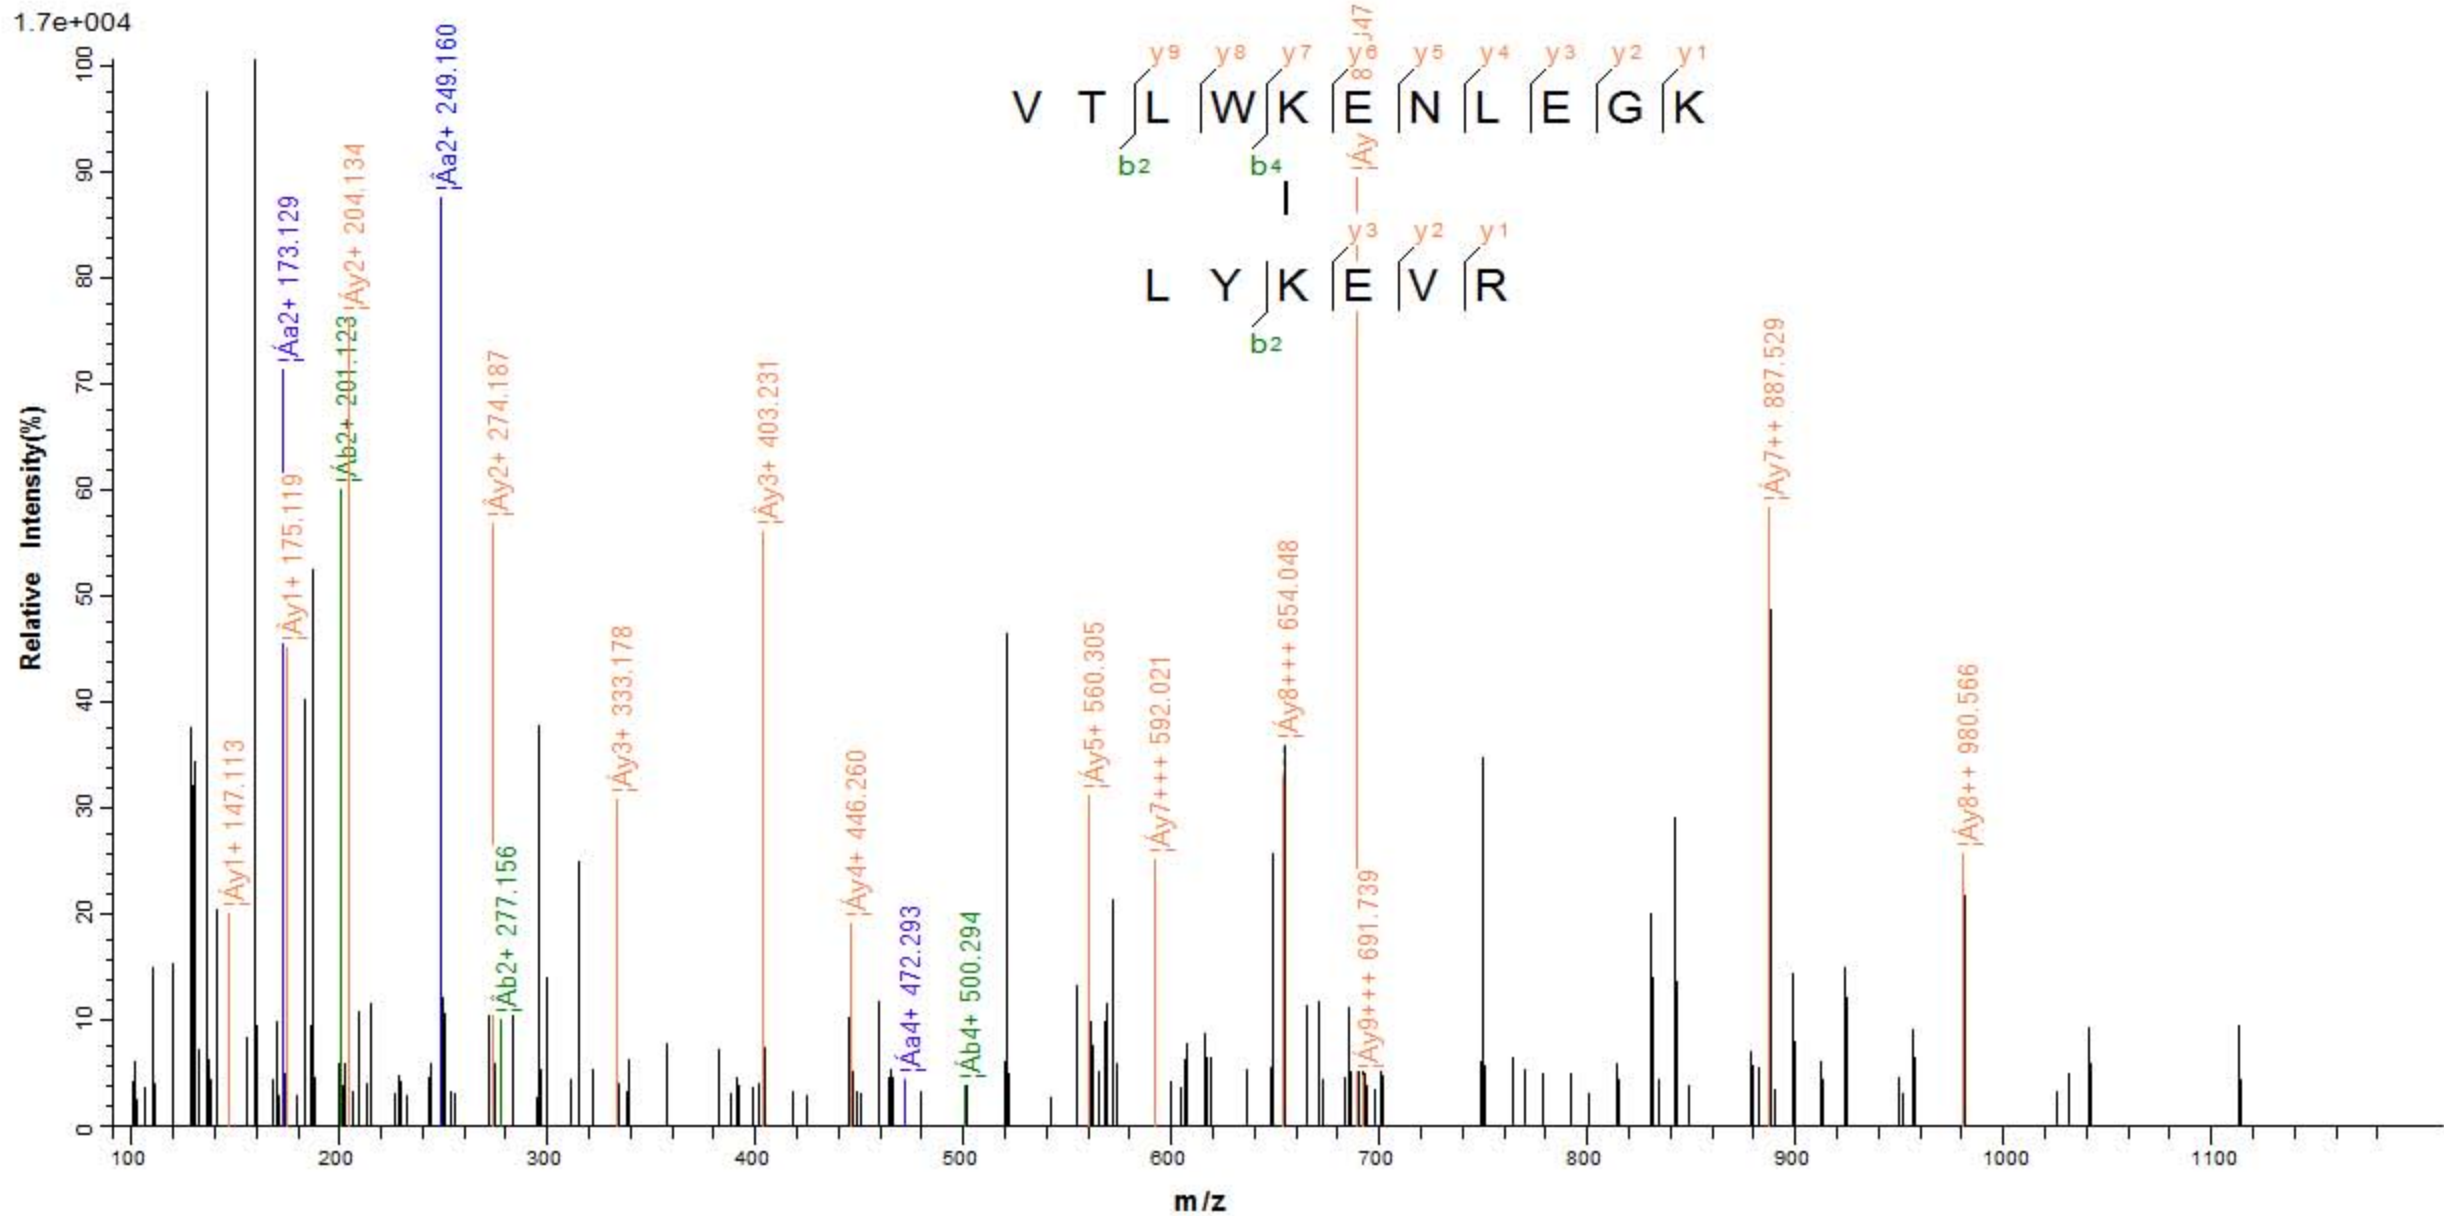

6.9e+004

Relative Intensity(%)

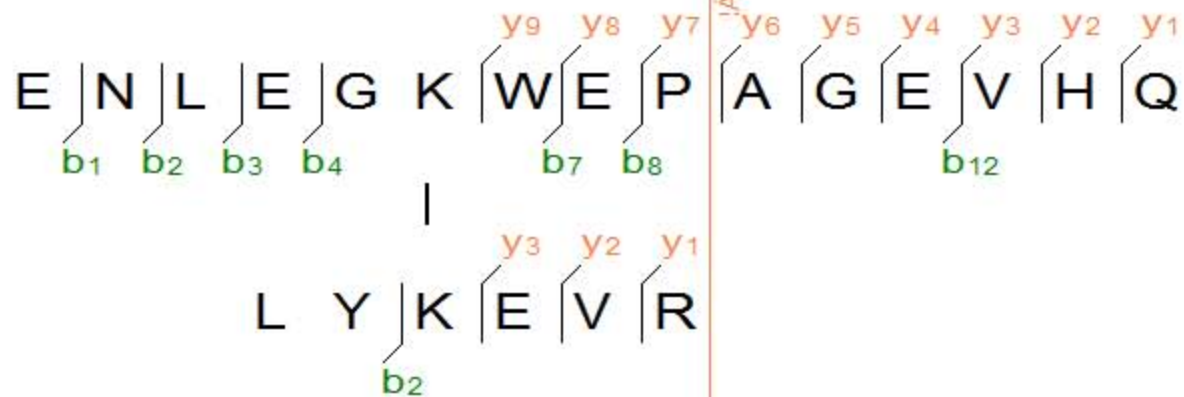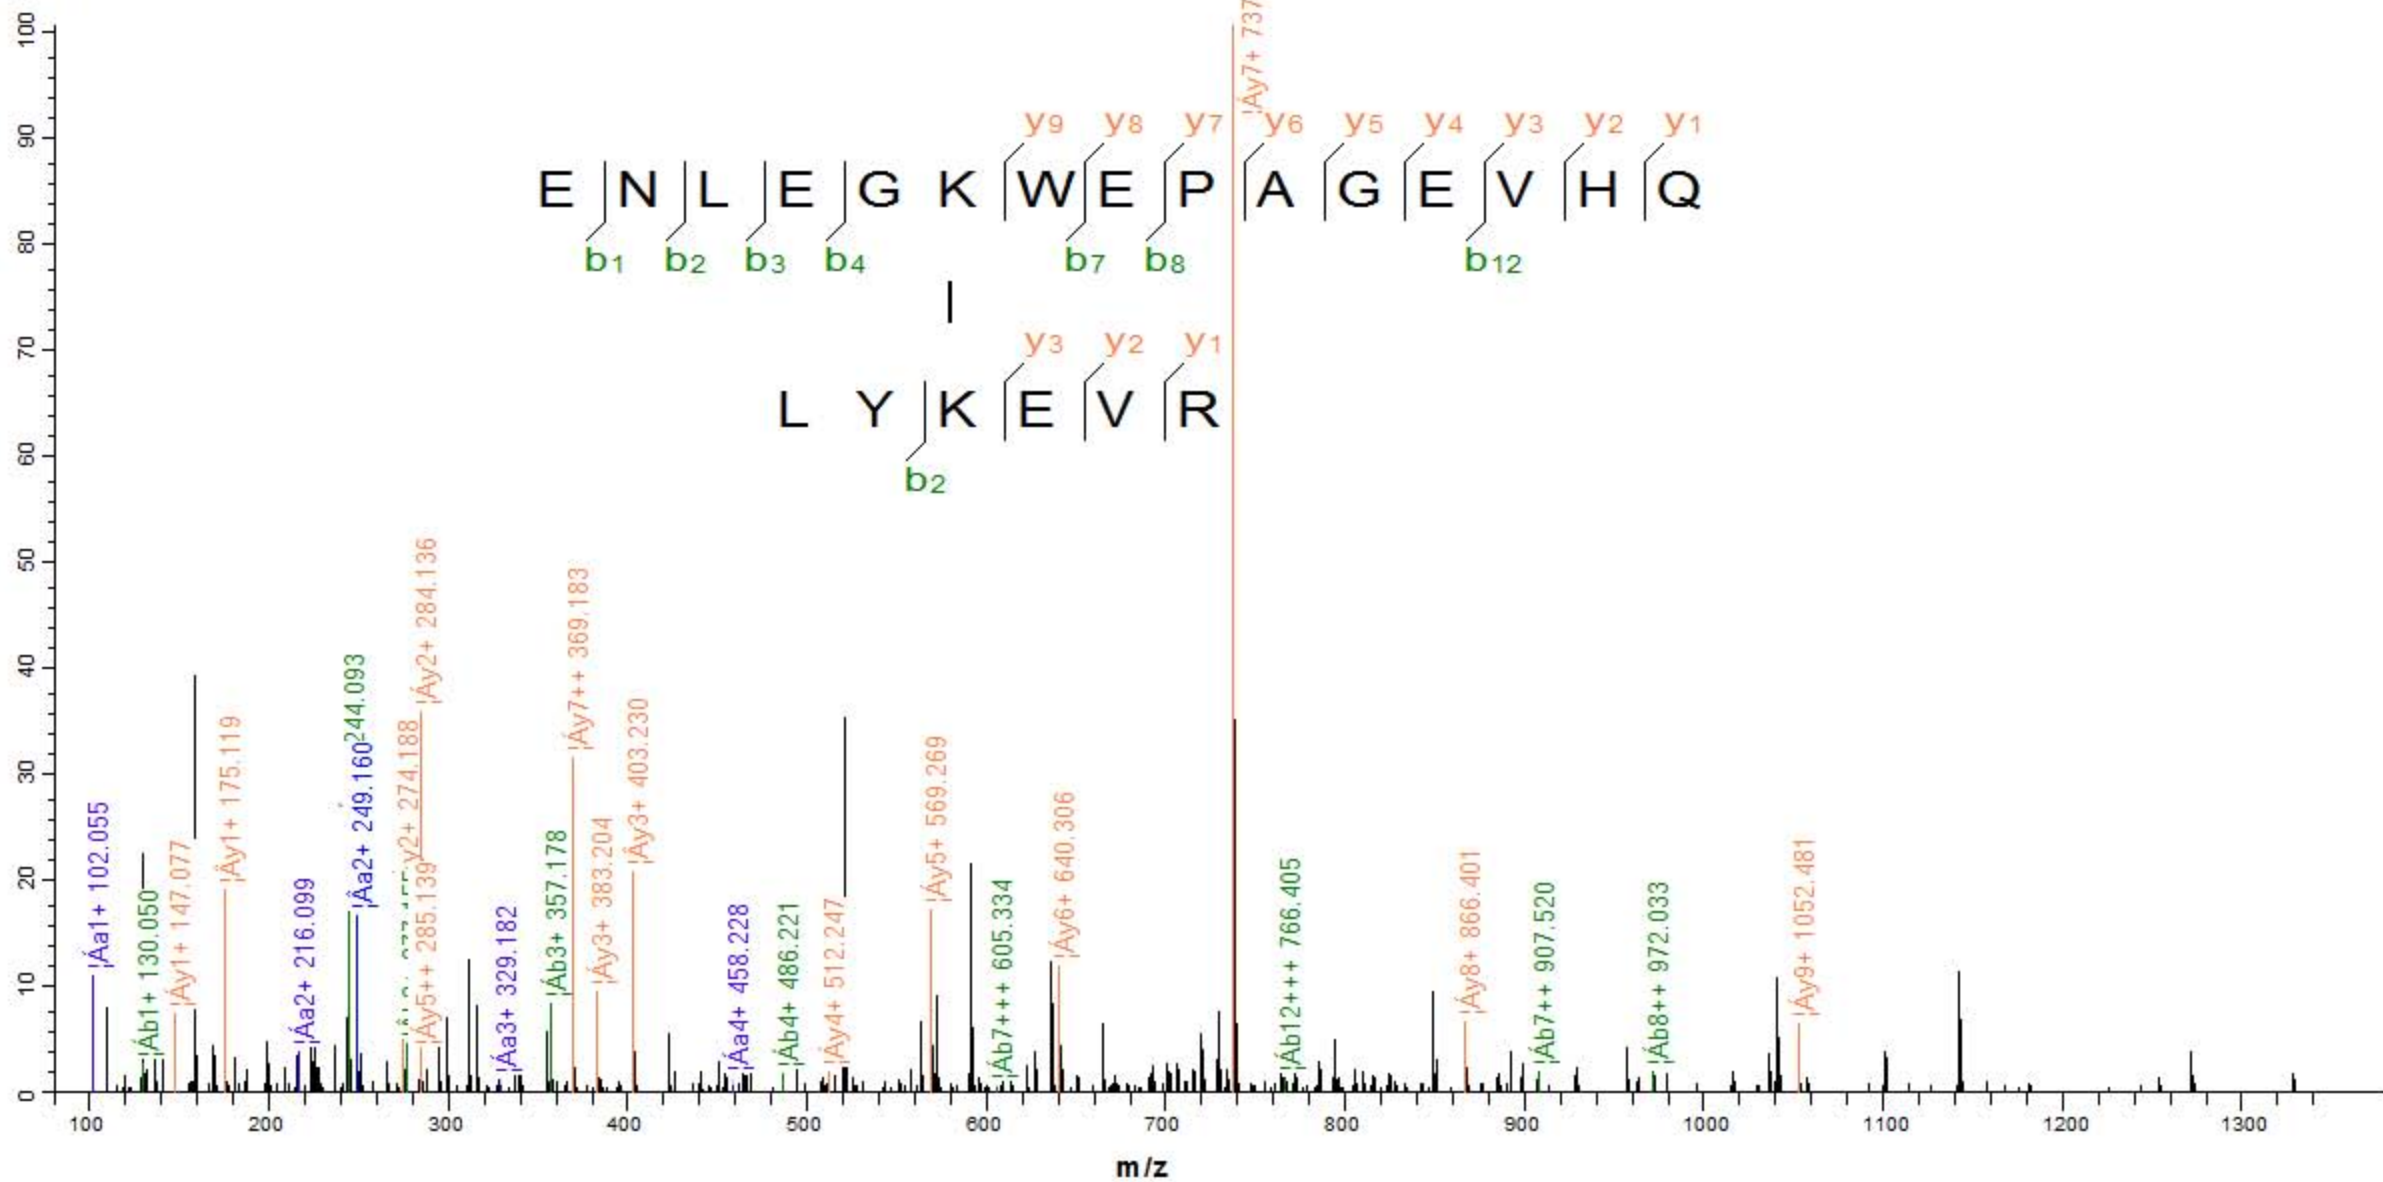

m/z

8.3e+003

Relative Intensity(%)

E | N | L | E | G | K | W | E | P | A | G | E | V | H | Q  
 b1 b2 b3 b4 b6 b7 y8 y7 y6 y5 y4 y3 y2 y1  
 K | T | L | L | K | E | E | K  
 y7 y6 y5 y4 y3 y2 y1

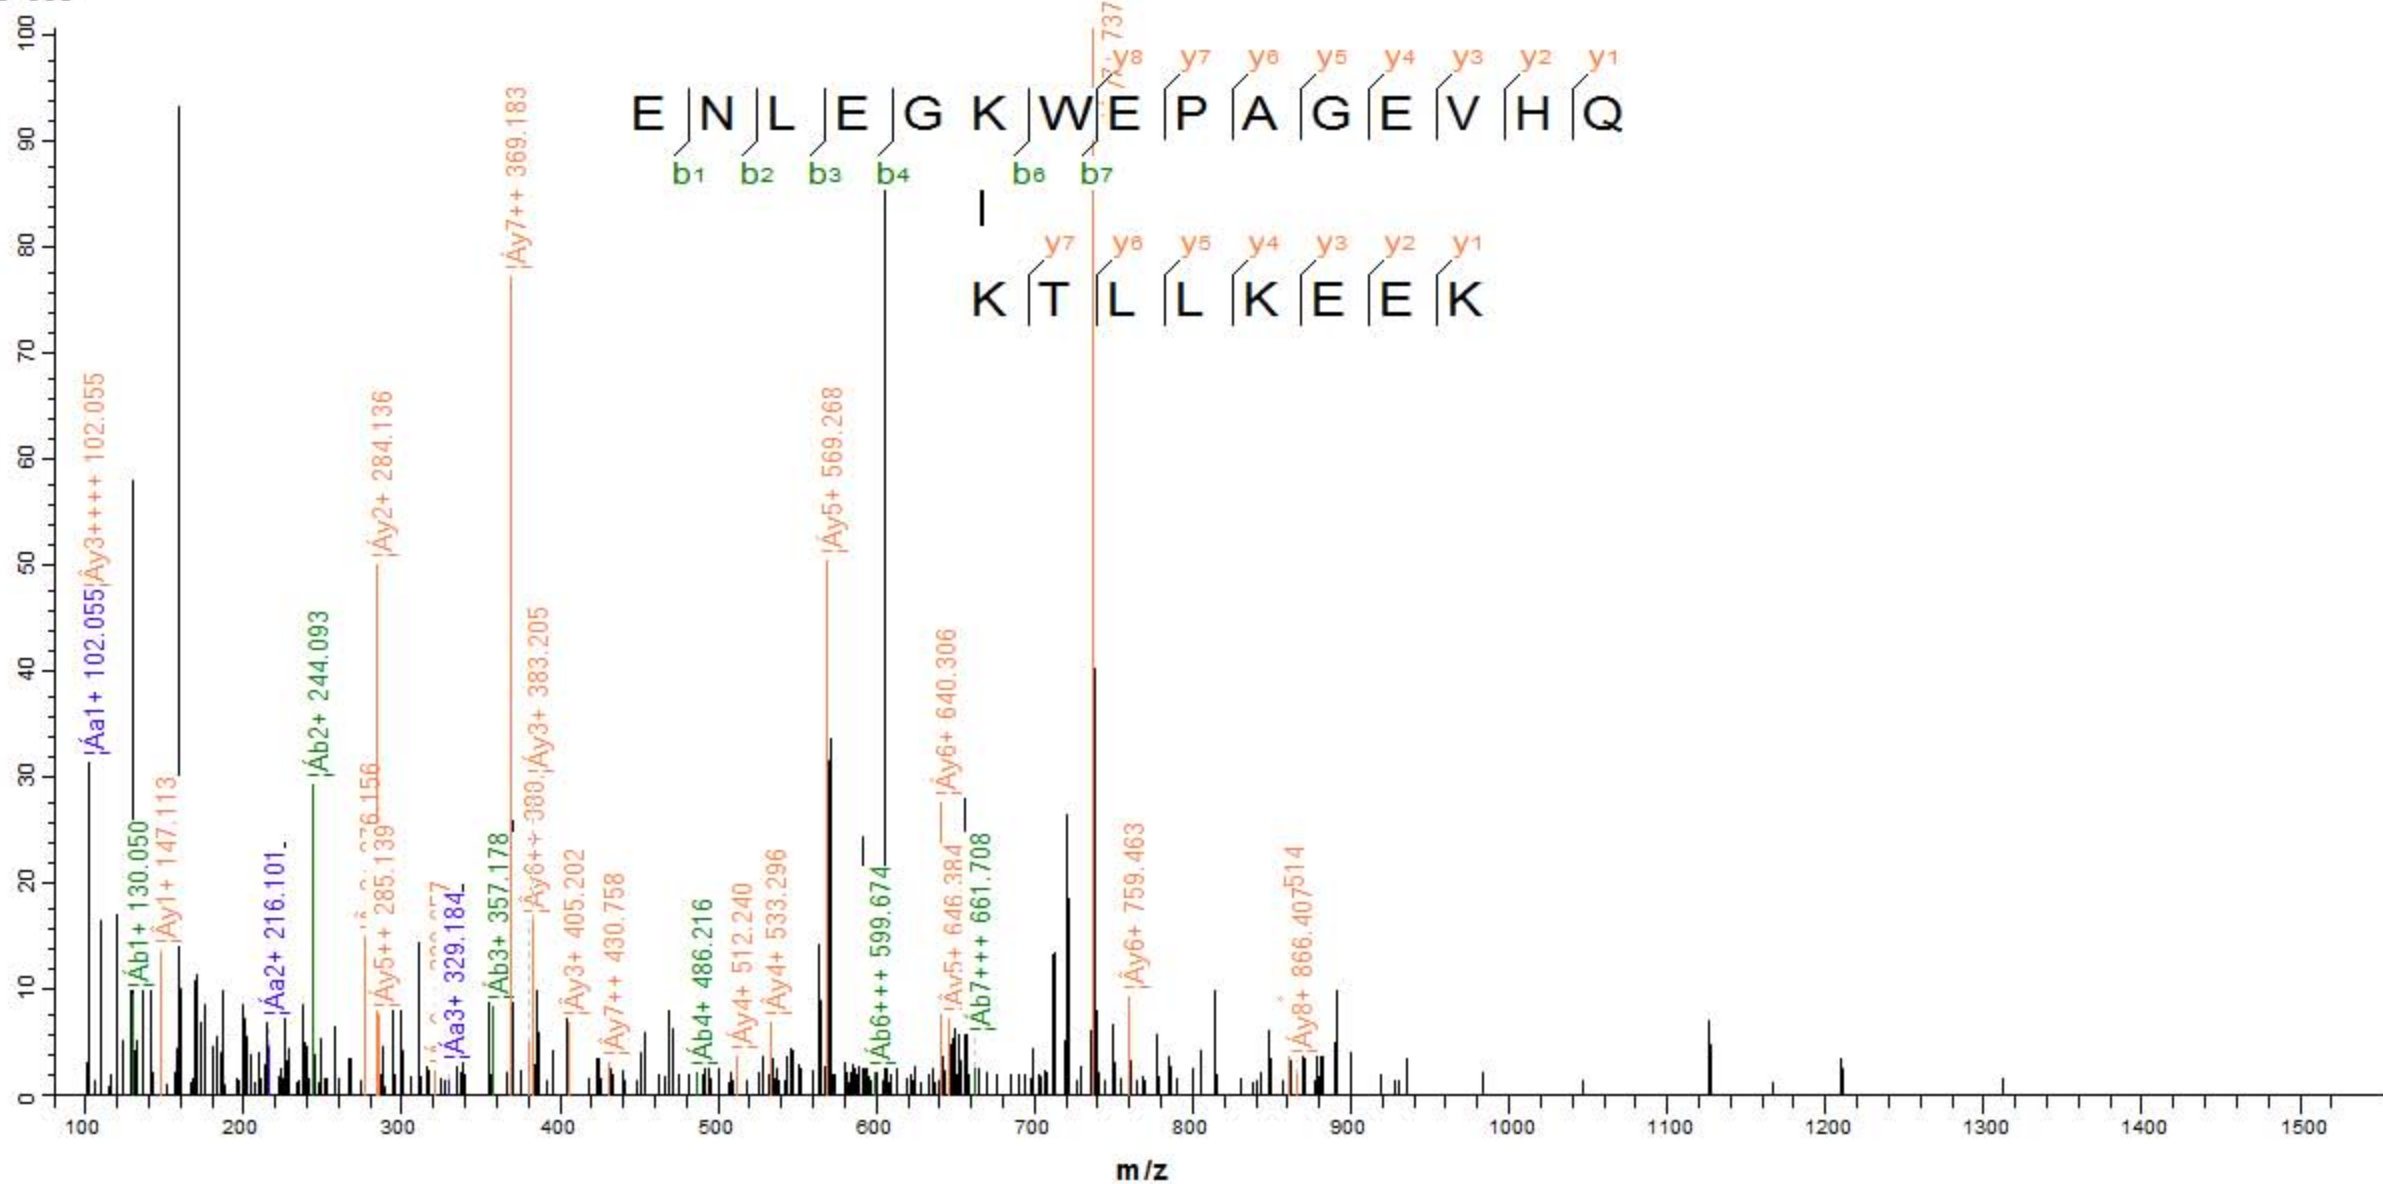

m/z

3.0e+004

Relative Intensity(%)

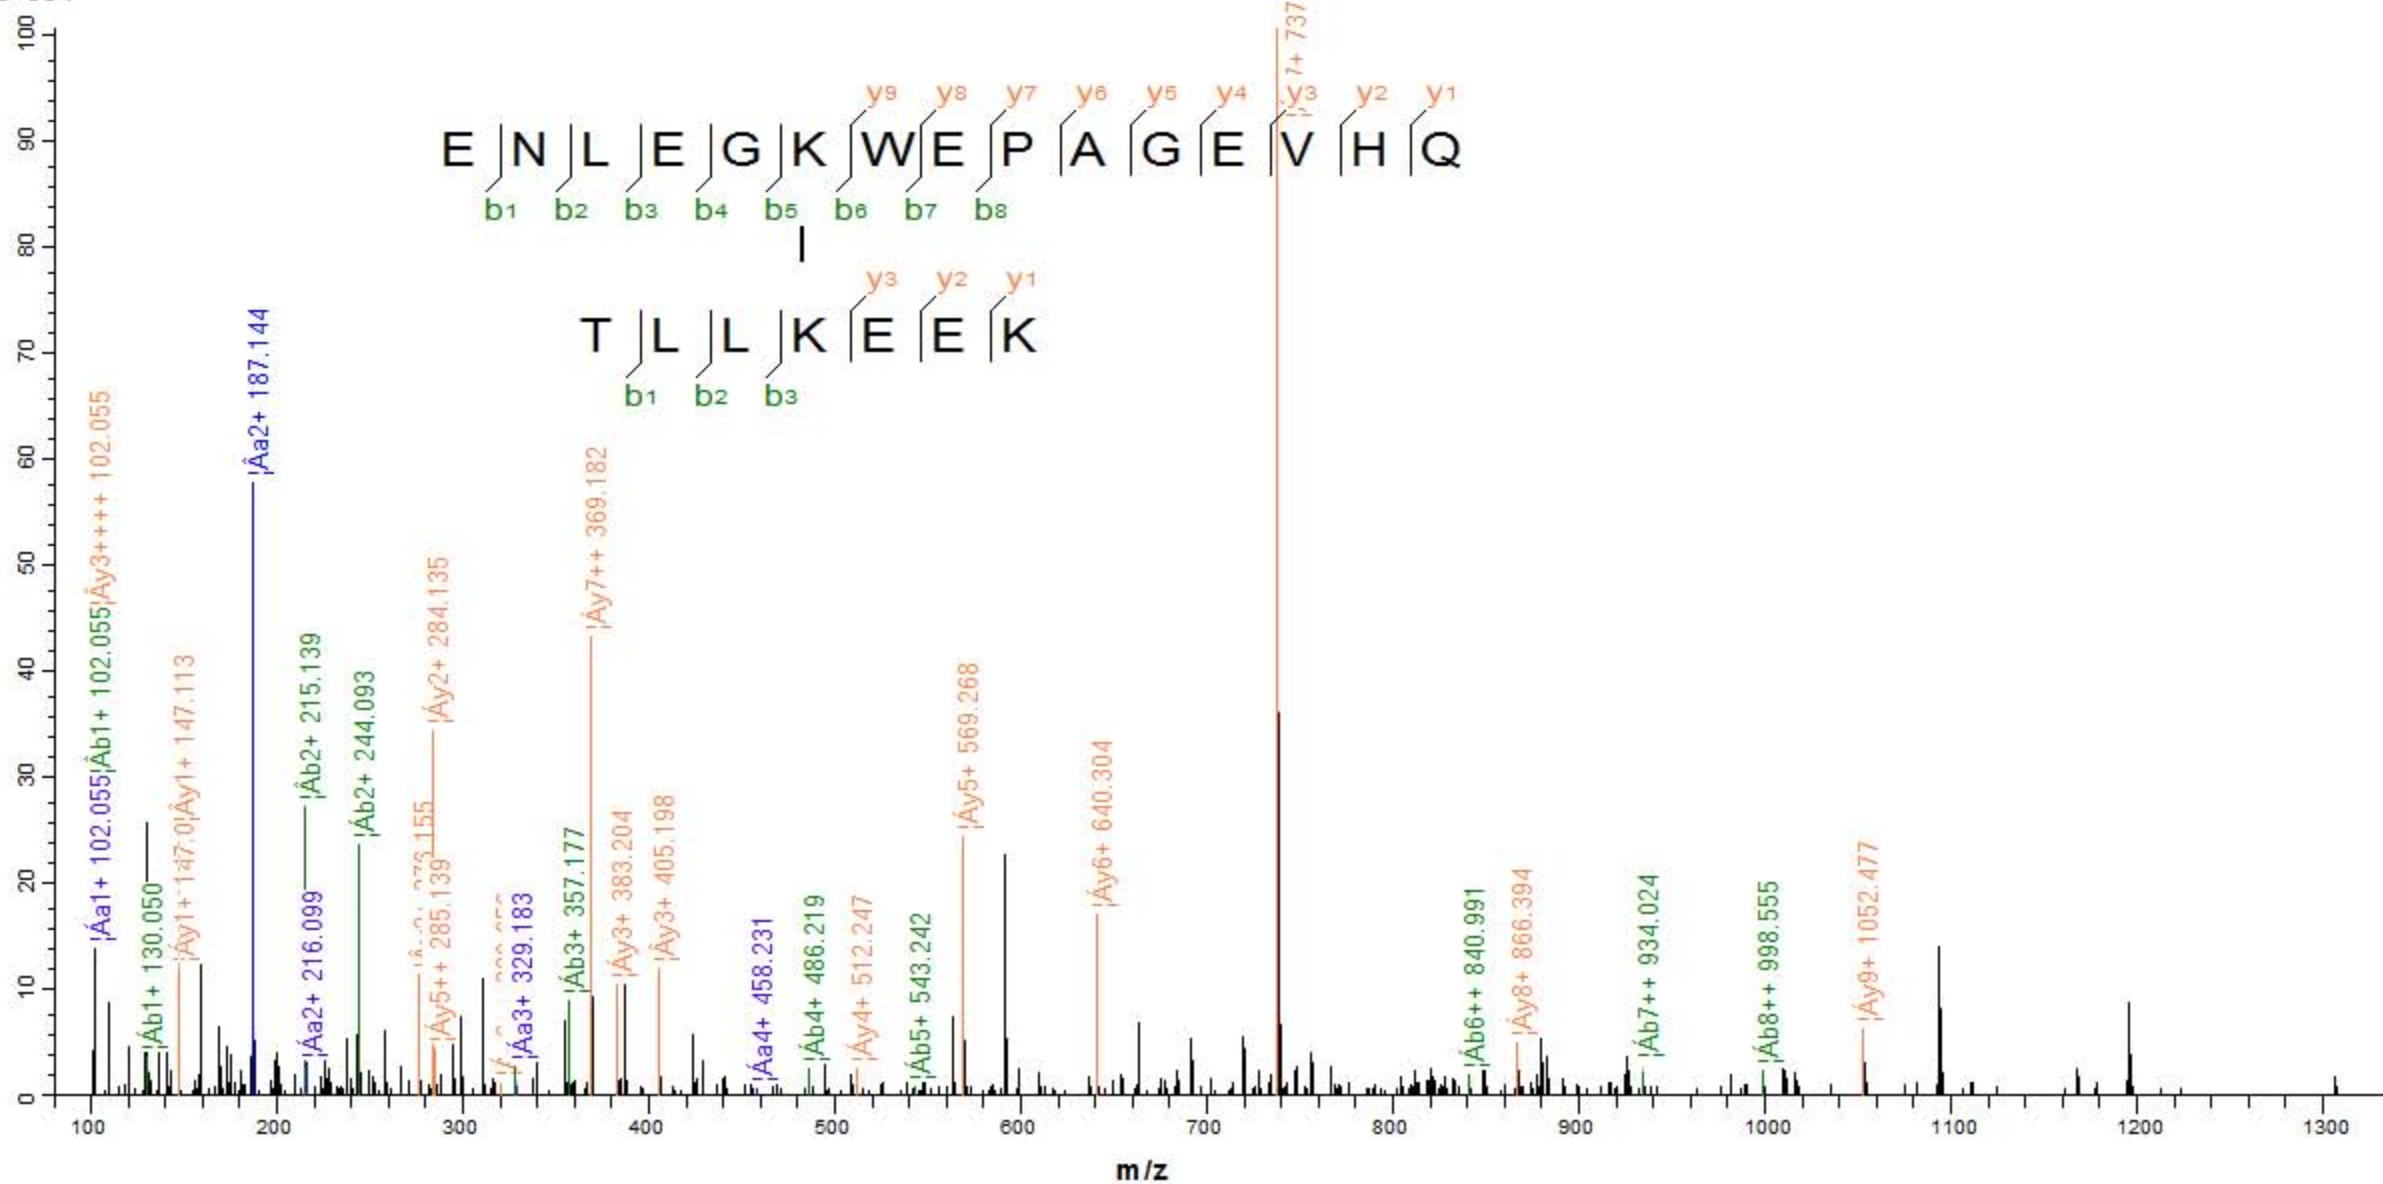

2.3e+003

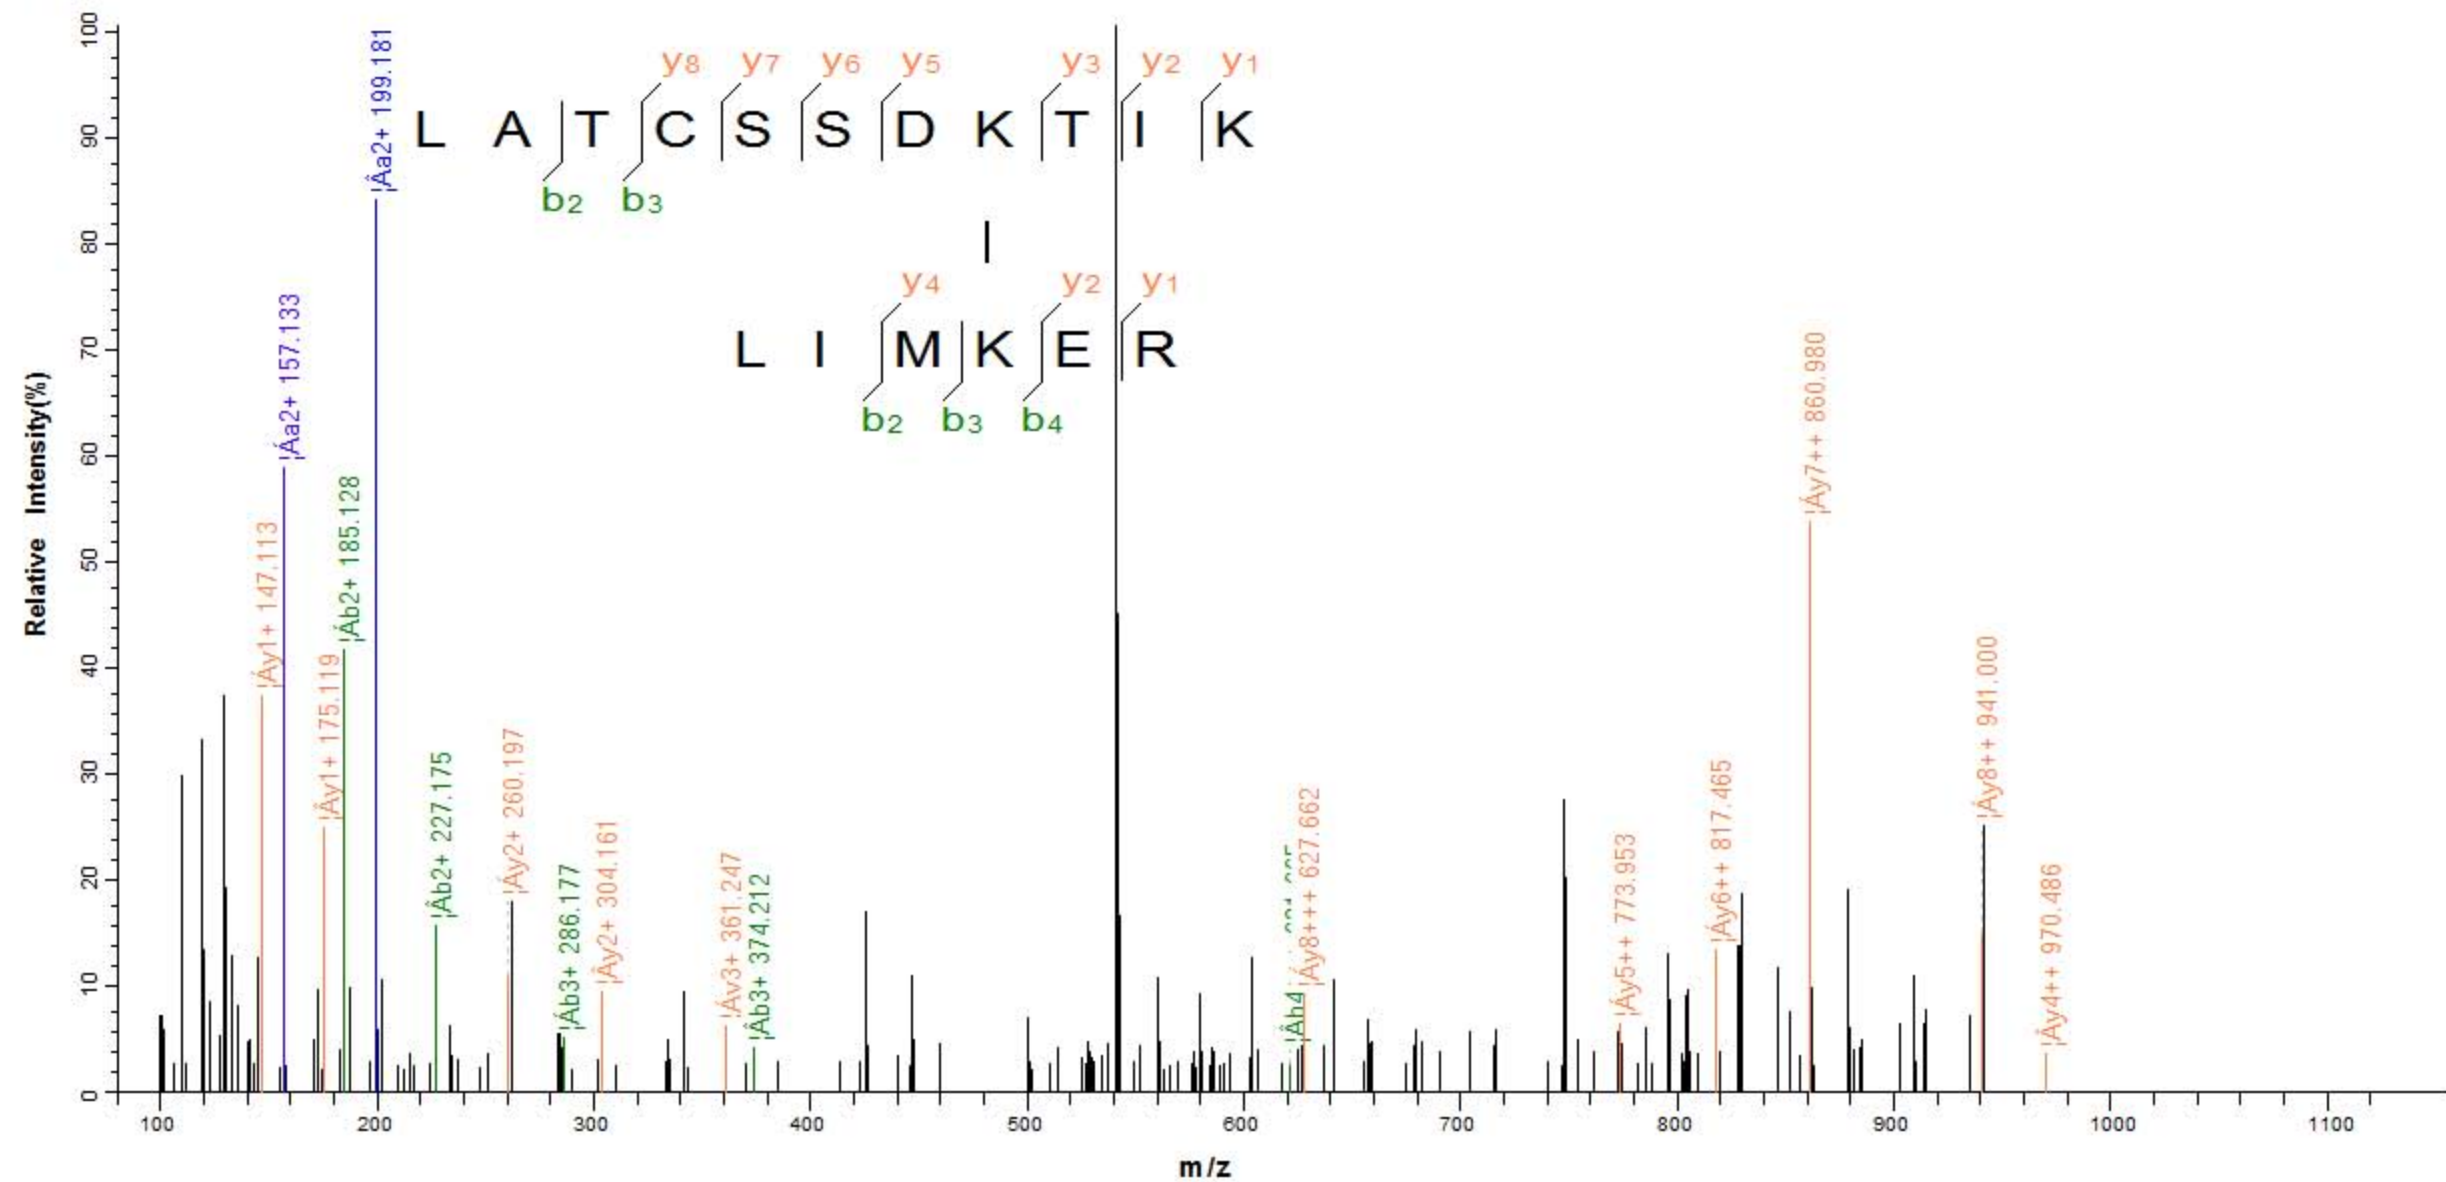



4.2e+004

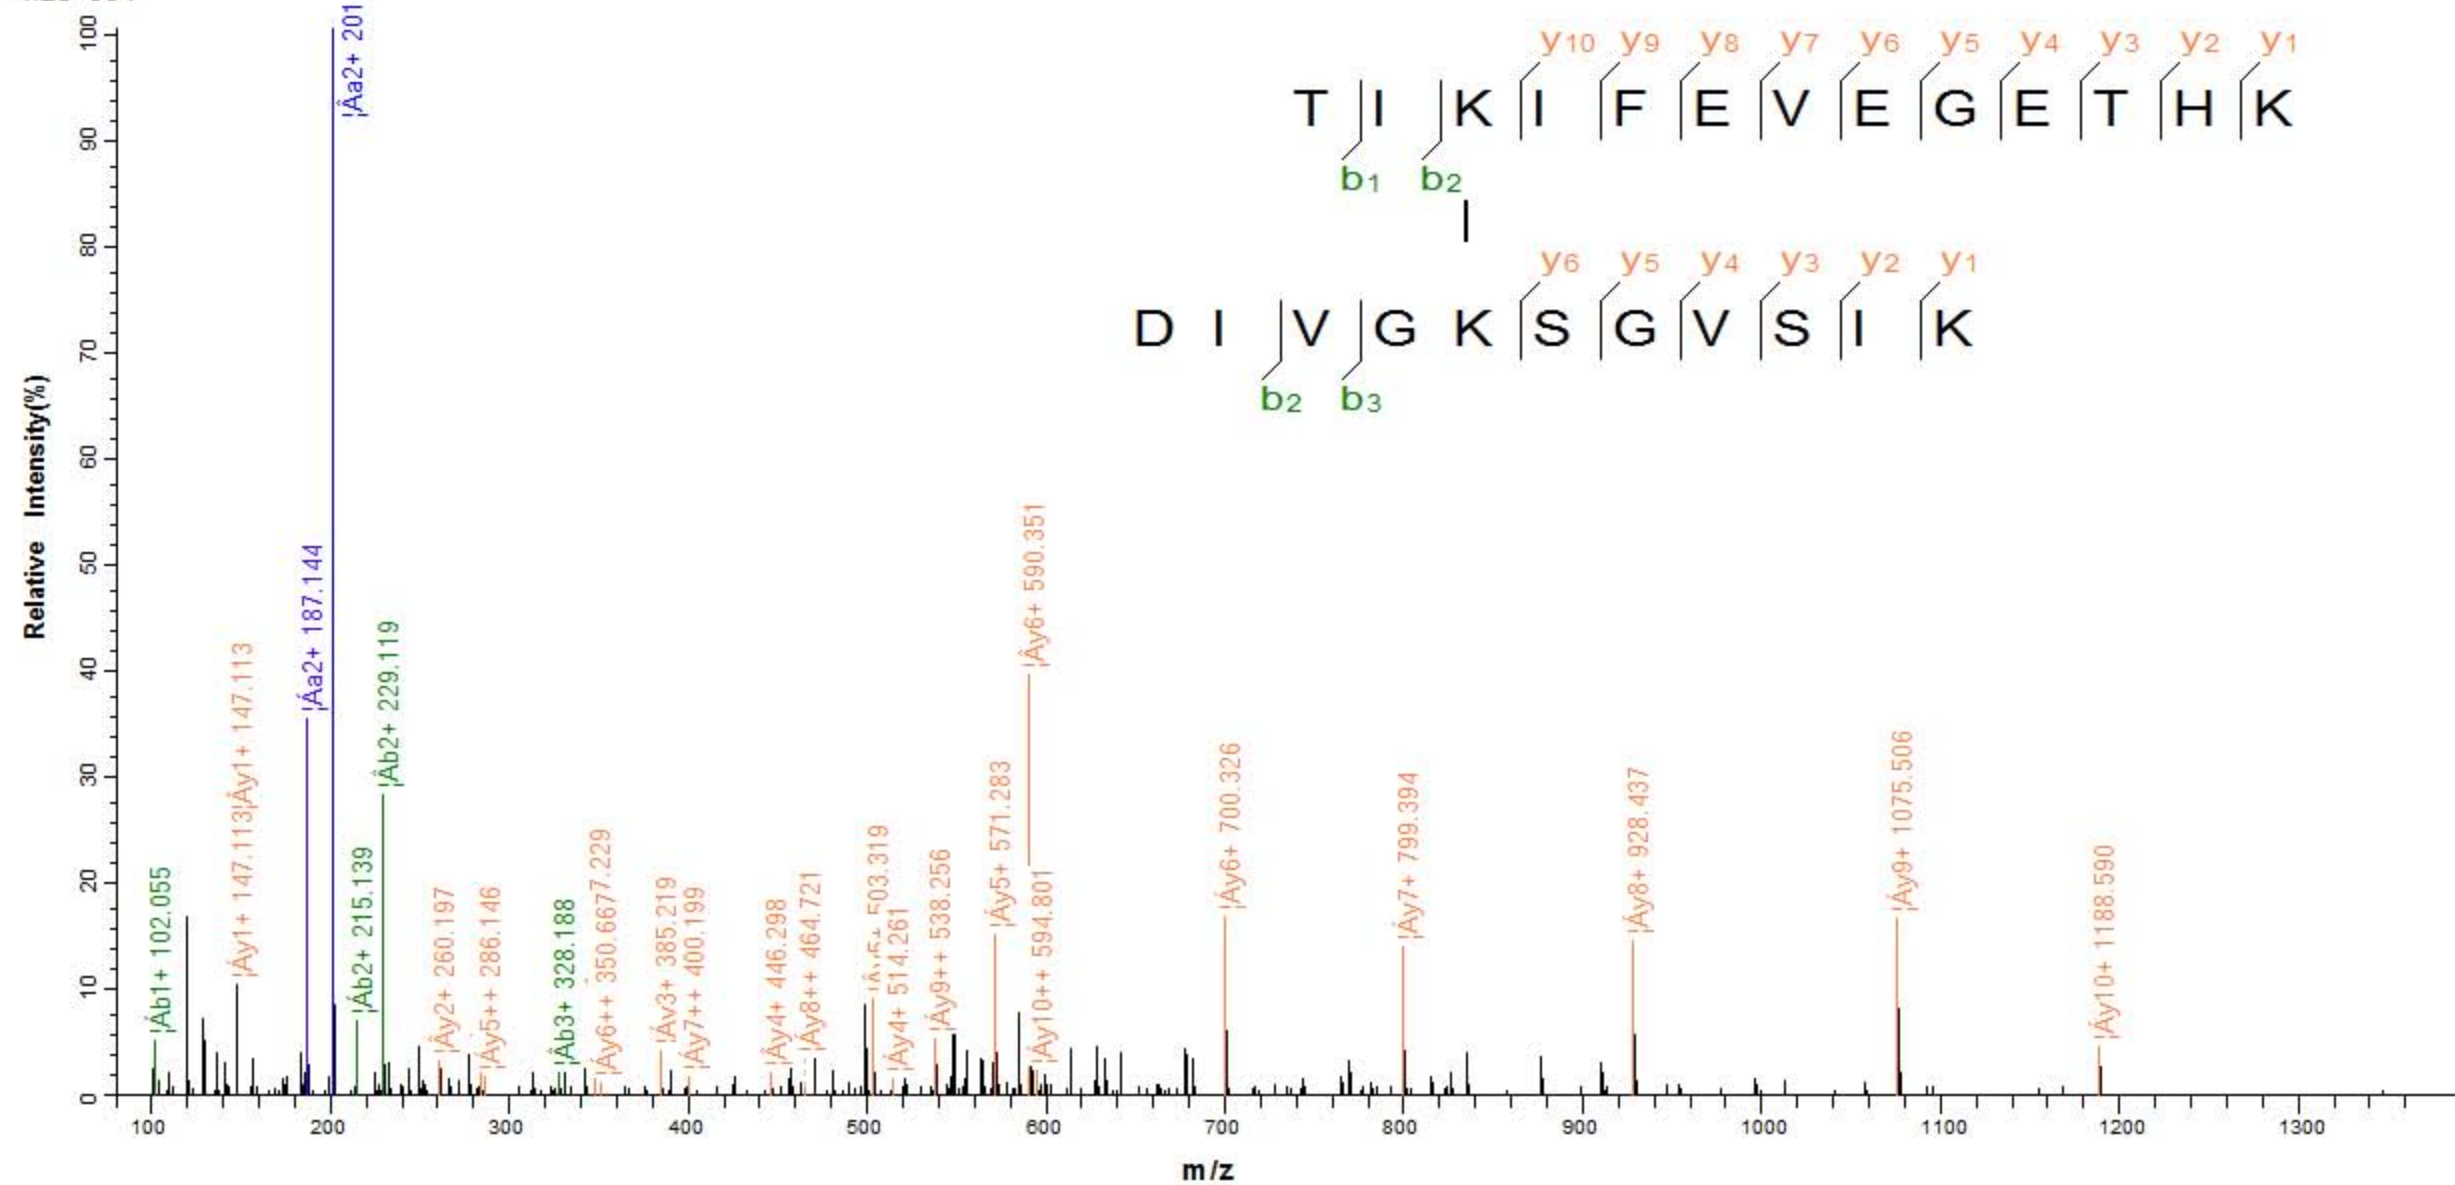

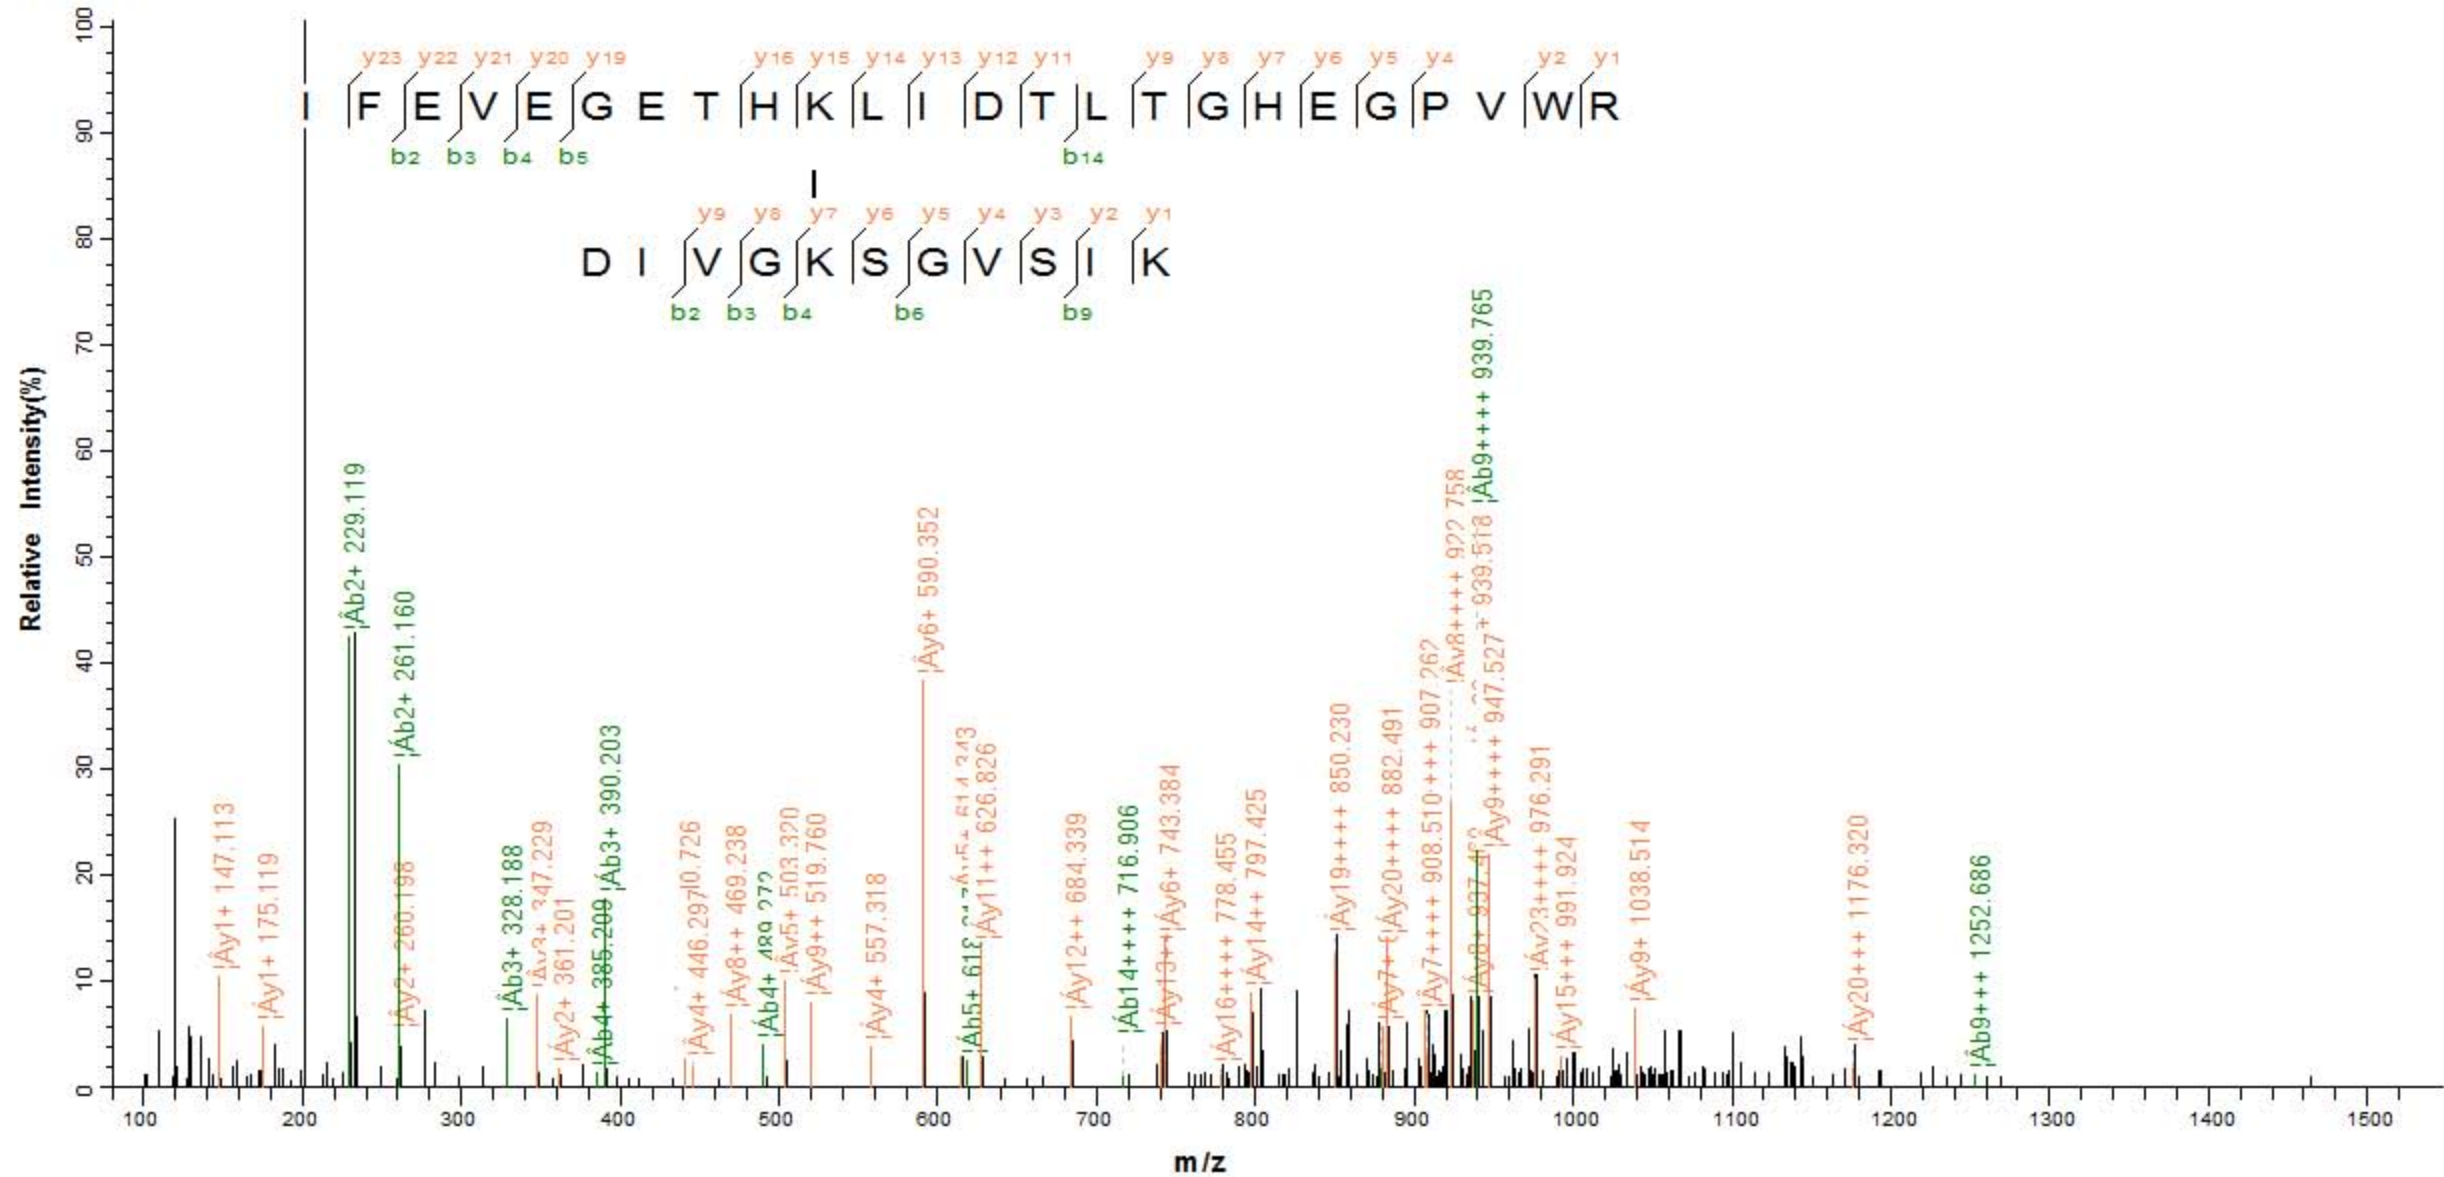

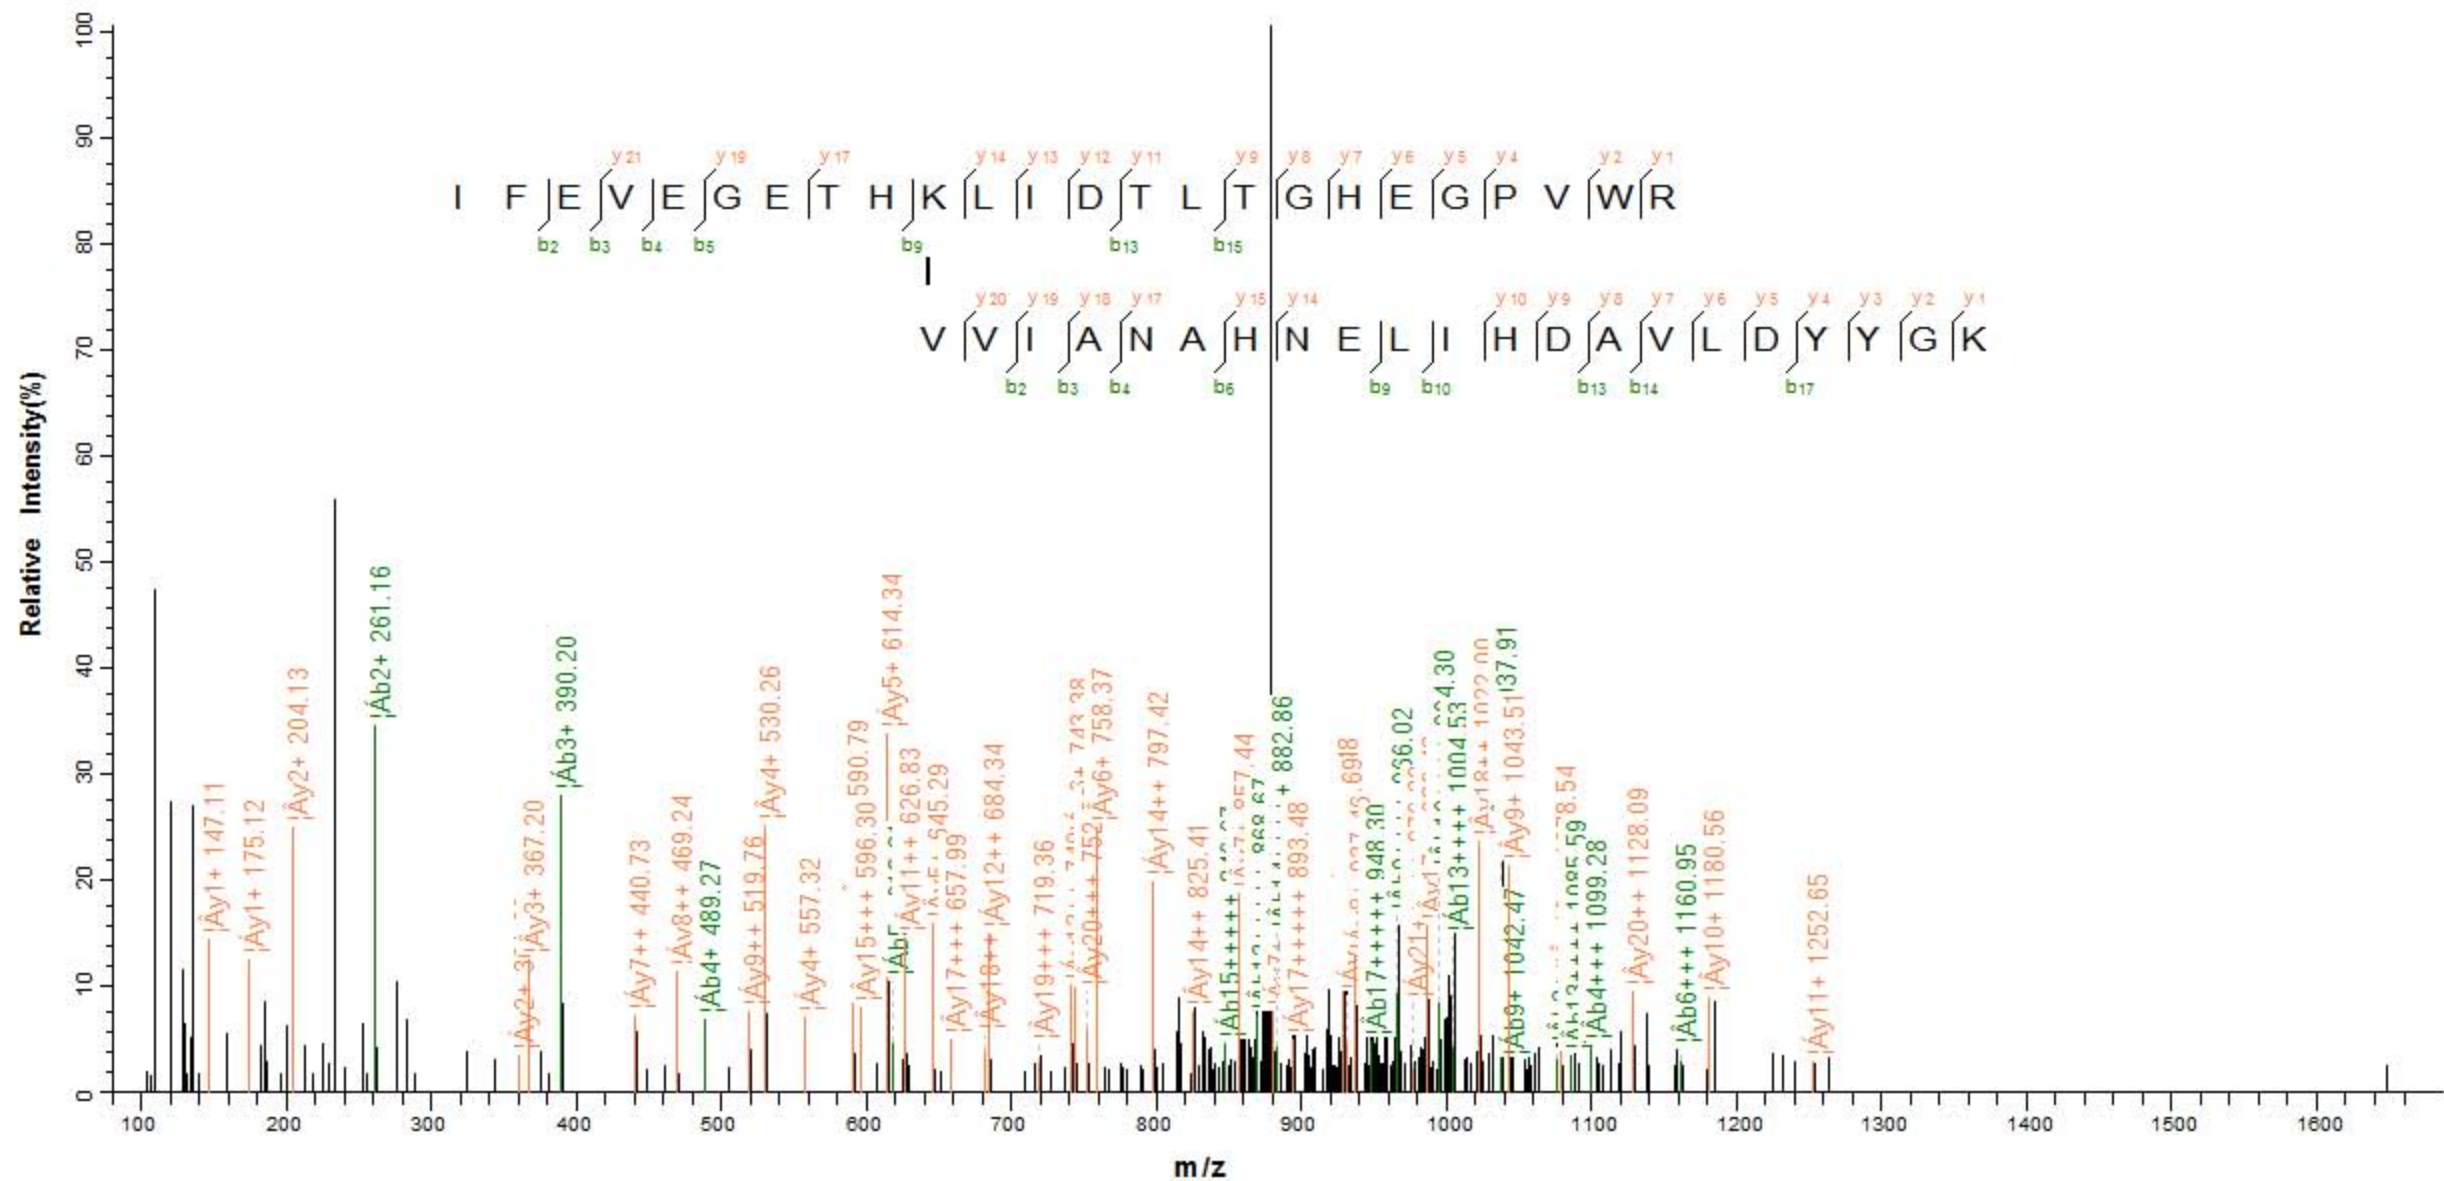

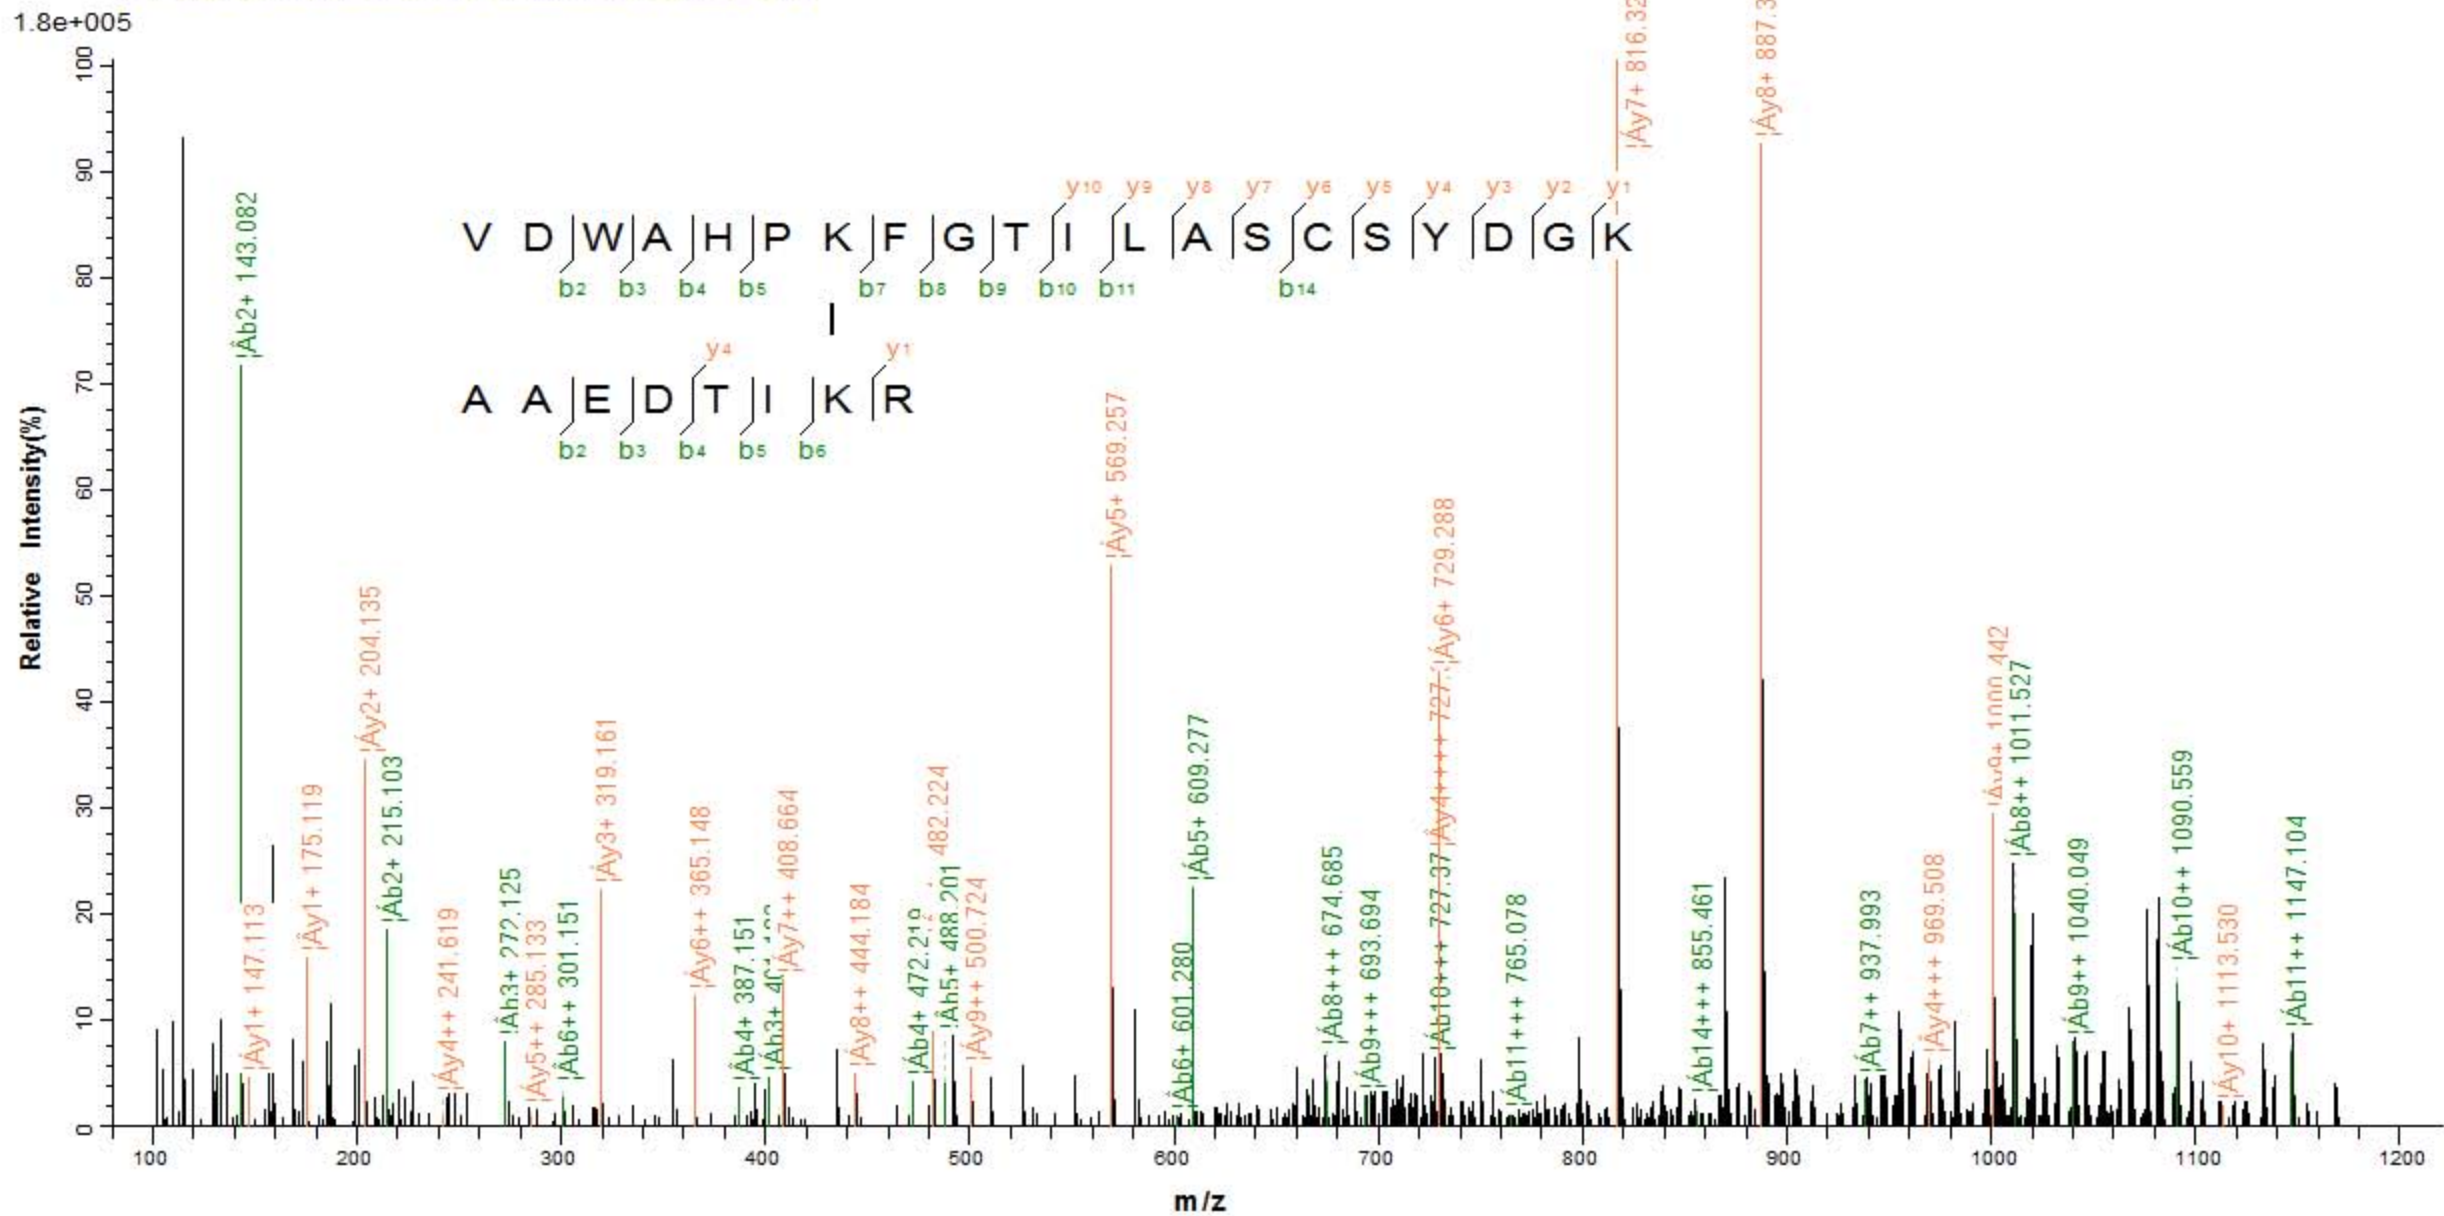

4.9e+003

Relative Intensity(%)

100  
90  
80  
70  
60  
50  
40  
30  
20  
10  
0

100 200 300 400 500 600 700 800 900 1000 1100 1200

m/z

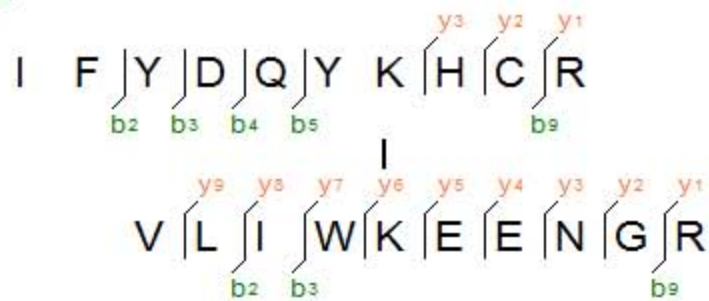

|Ab2++ 131.083

|Ay1+ 175.119 |Ay1+ 175.119

|Ab5+ 213.16 |Ay2+ 232.140

|Ab2+ 261.159

|Ab3+ 335.140

|Ay2+ 335.140

|Ay3+ 346.183

|Ab3+ 424.221

|Ay3+ |Ay4+ 475.225

|Ab4+ 539.245

|Ay5+ 604.267

|Ay6+++ 771.060

|Ay7+++ 833.084

|Av8+++ 870.781

|Ab9+++ 883.47 |Ab9+++ 883.477

|Ay9+++ 908.468

|Ay6++ 1156.078

|Ay7++ 1249.115

3.4e+003

Relative Intensity(%)

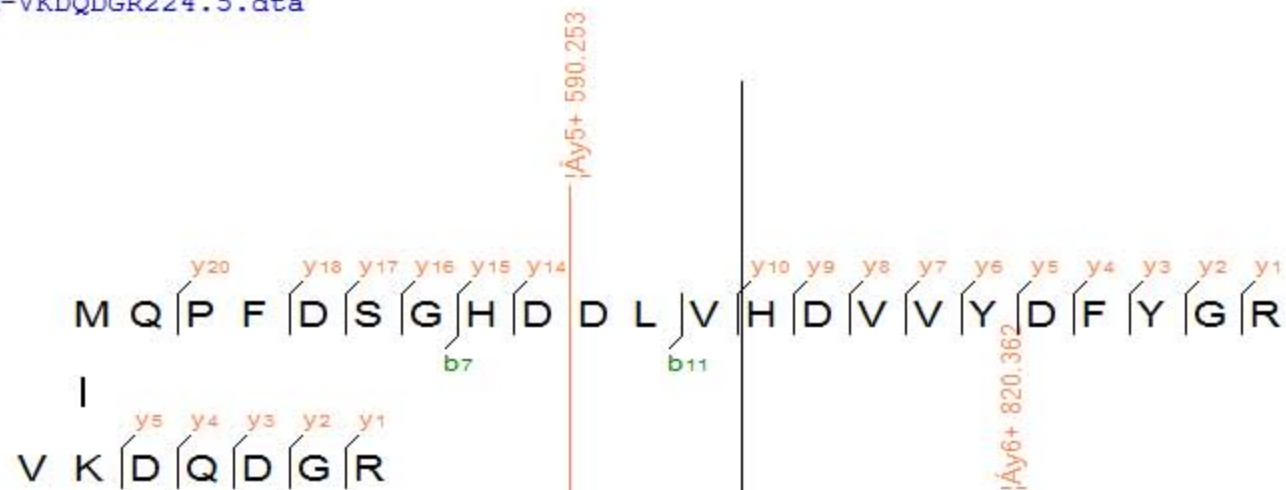

m/z

2.2e+004

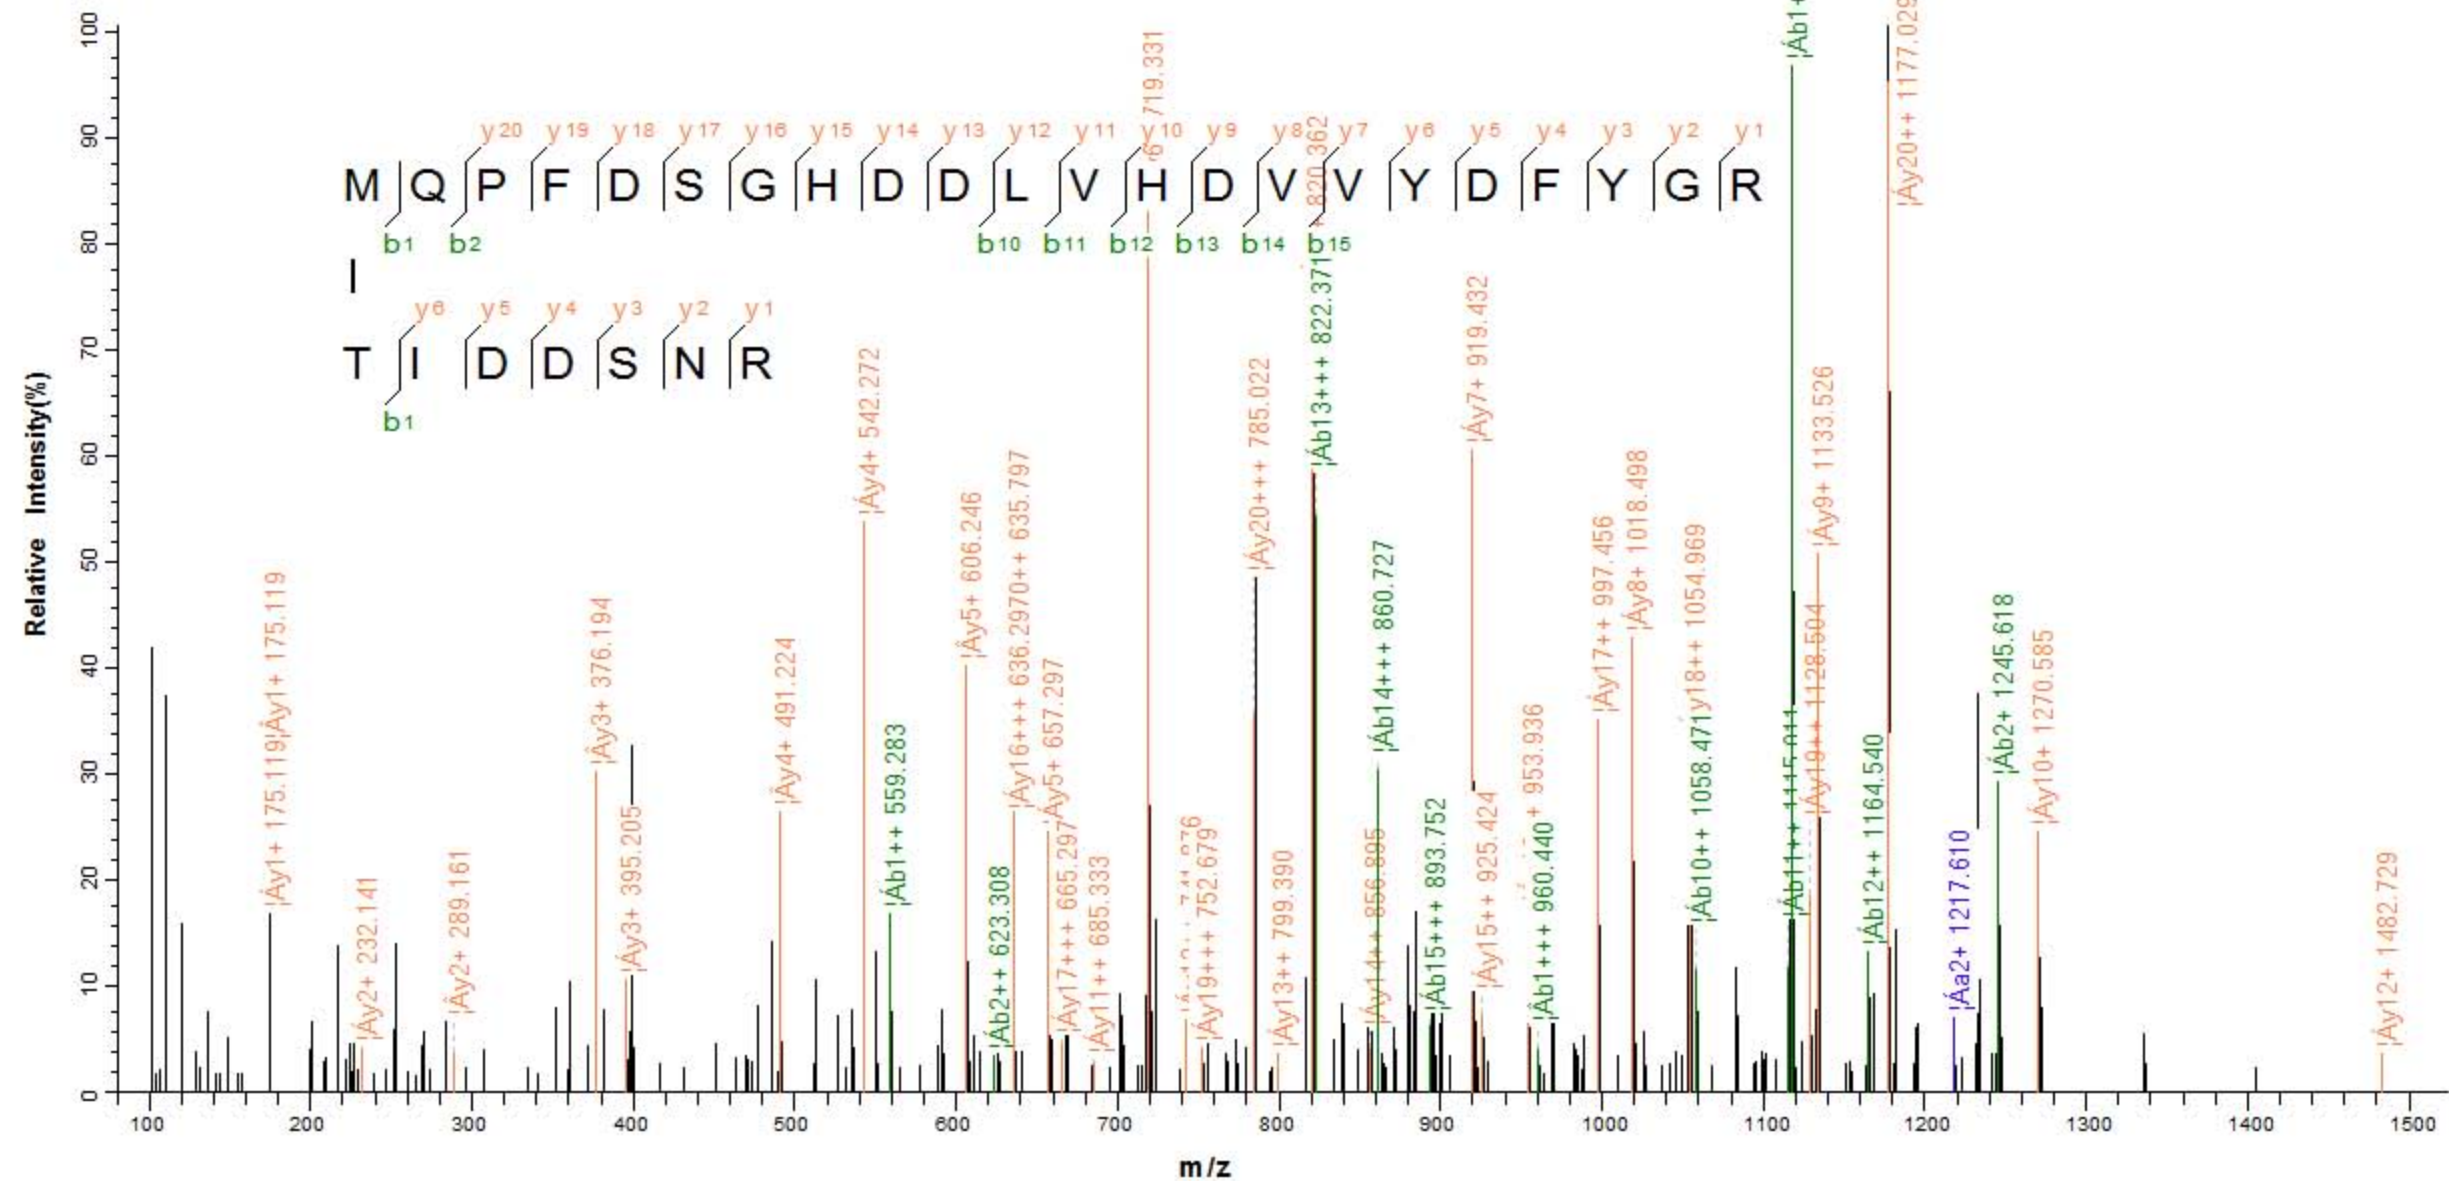

7.4e+003

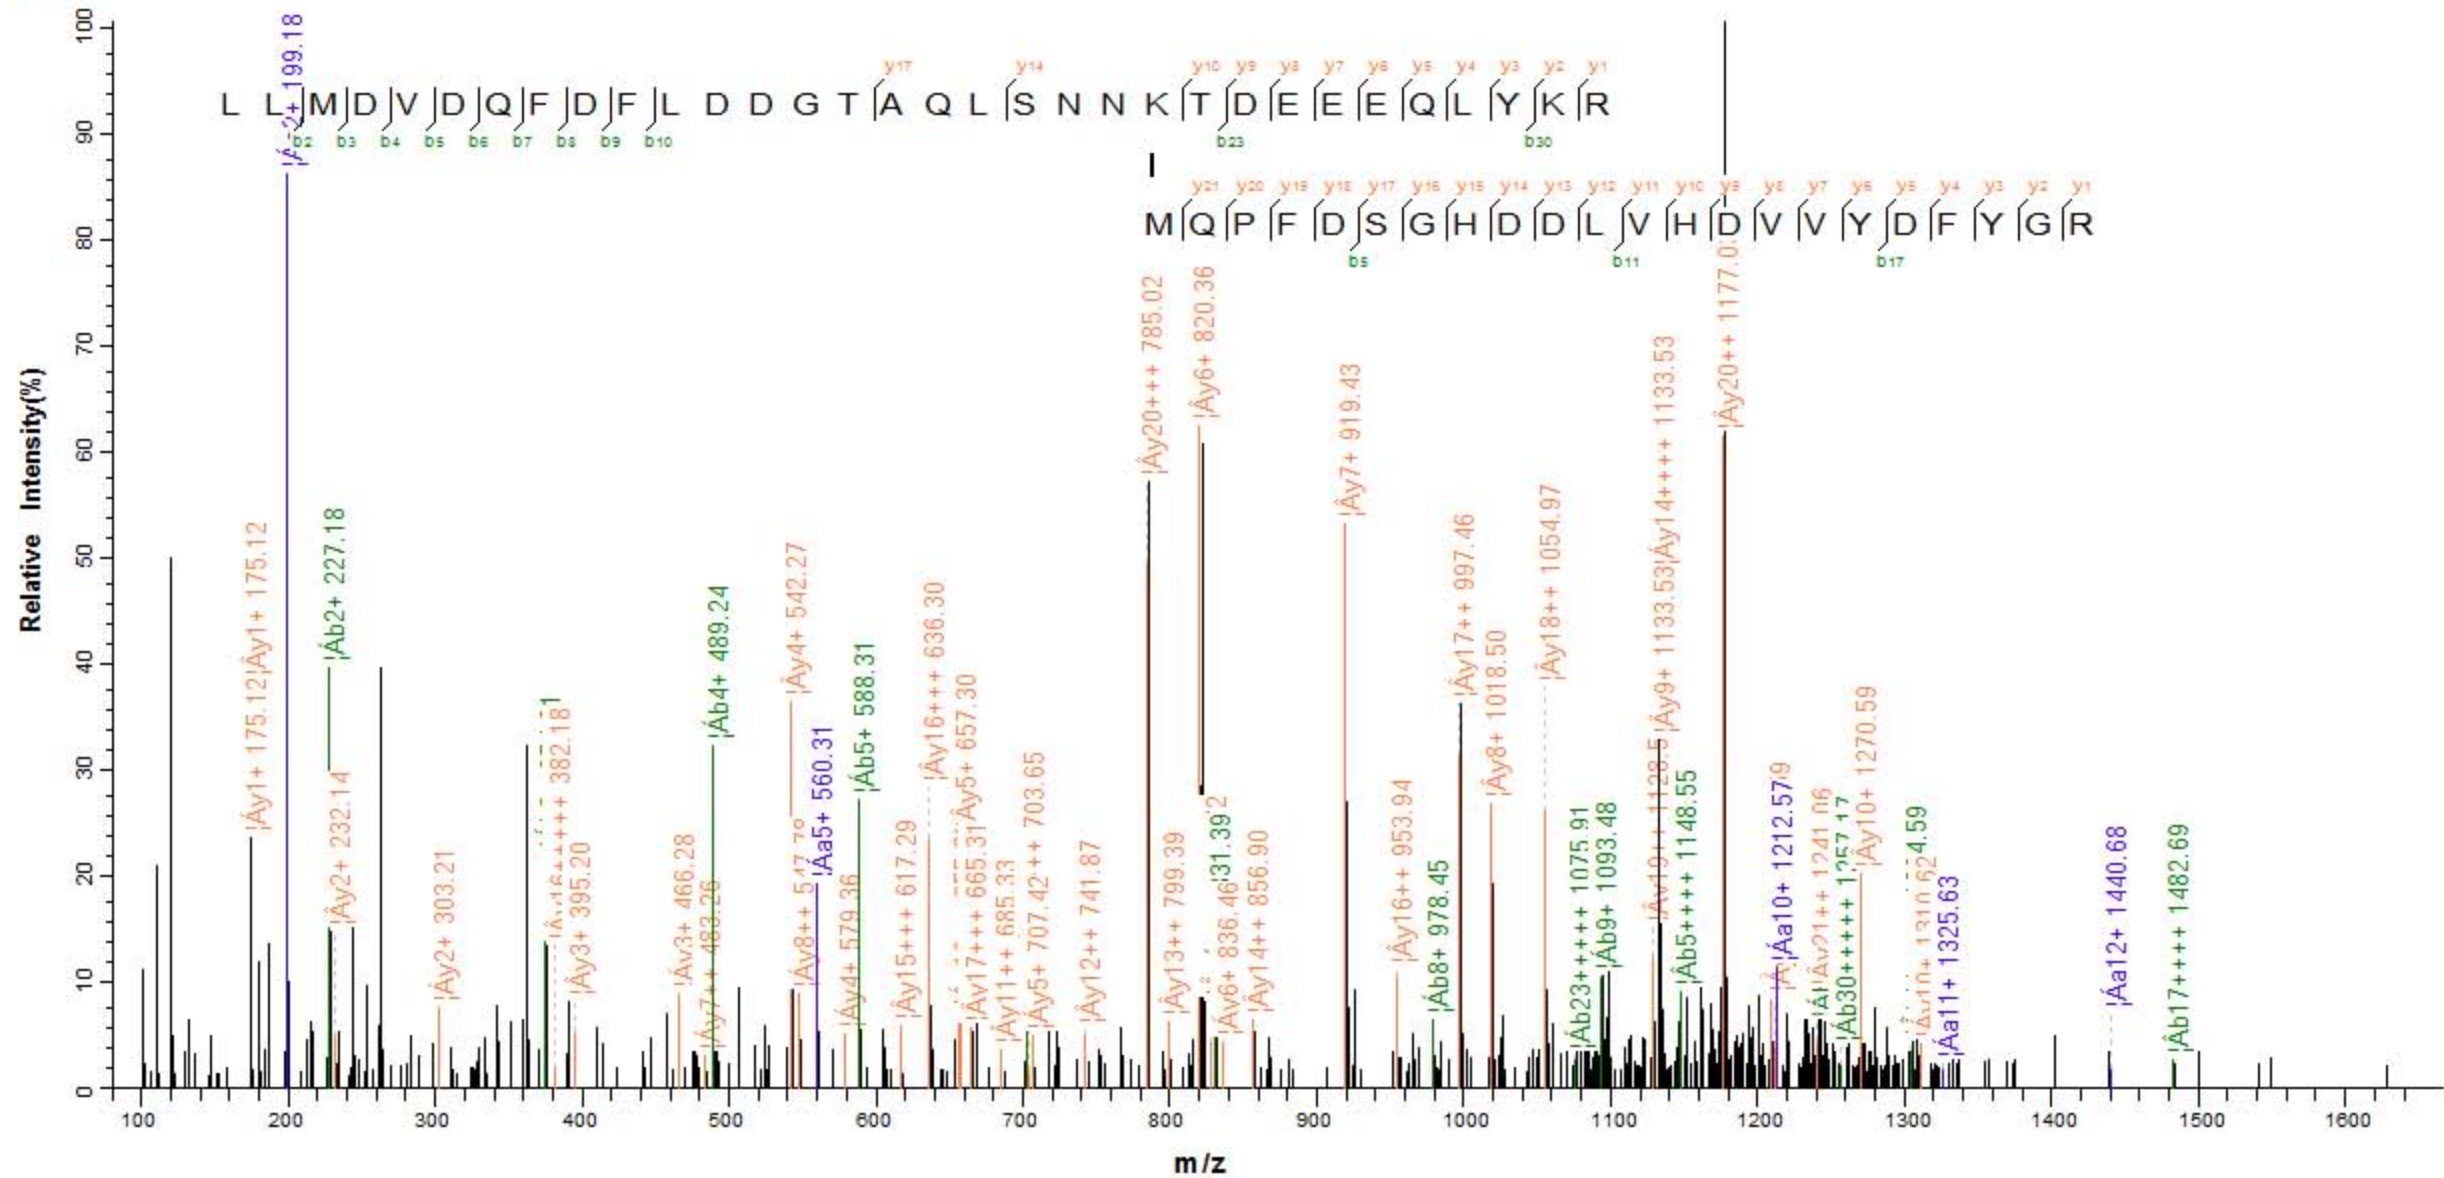



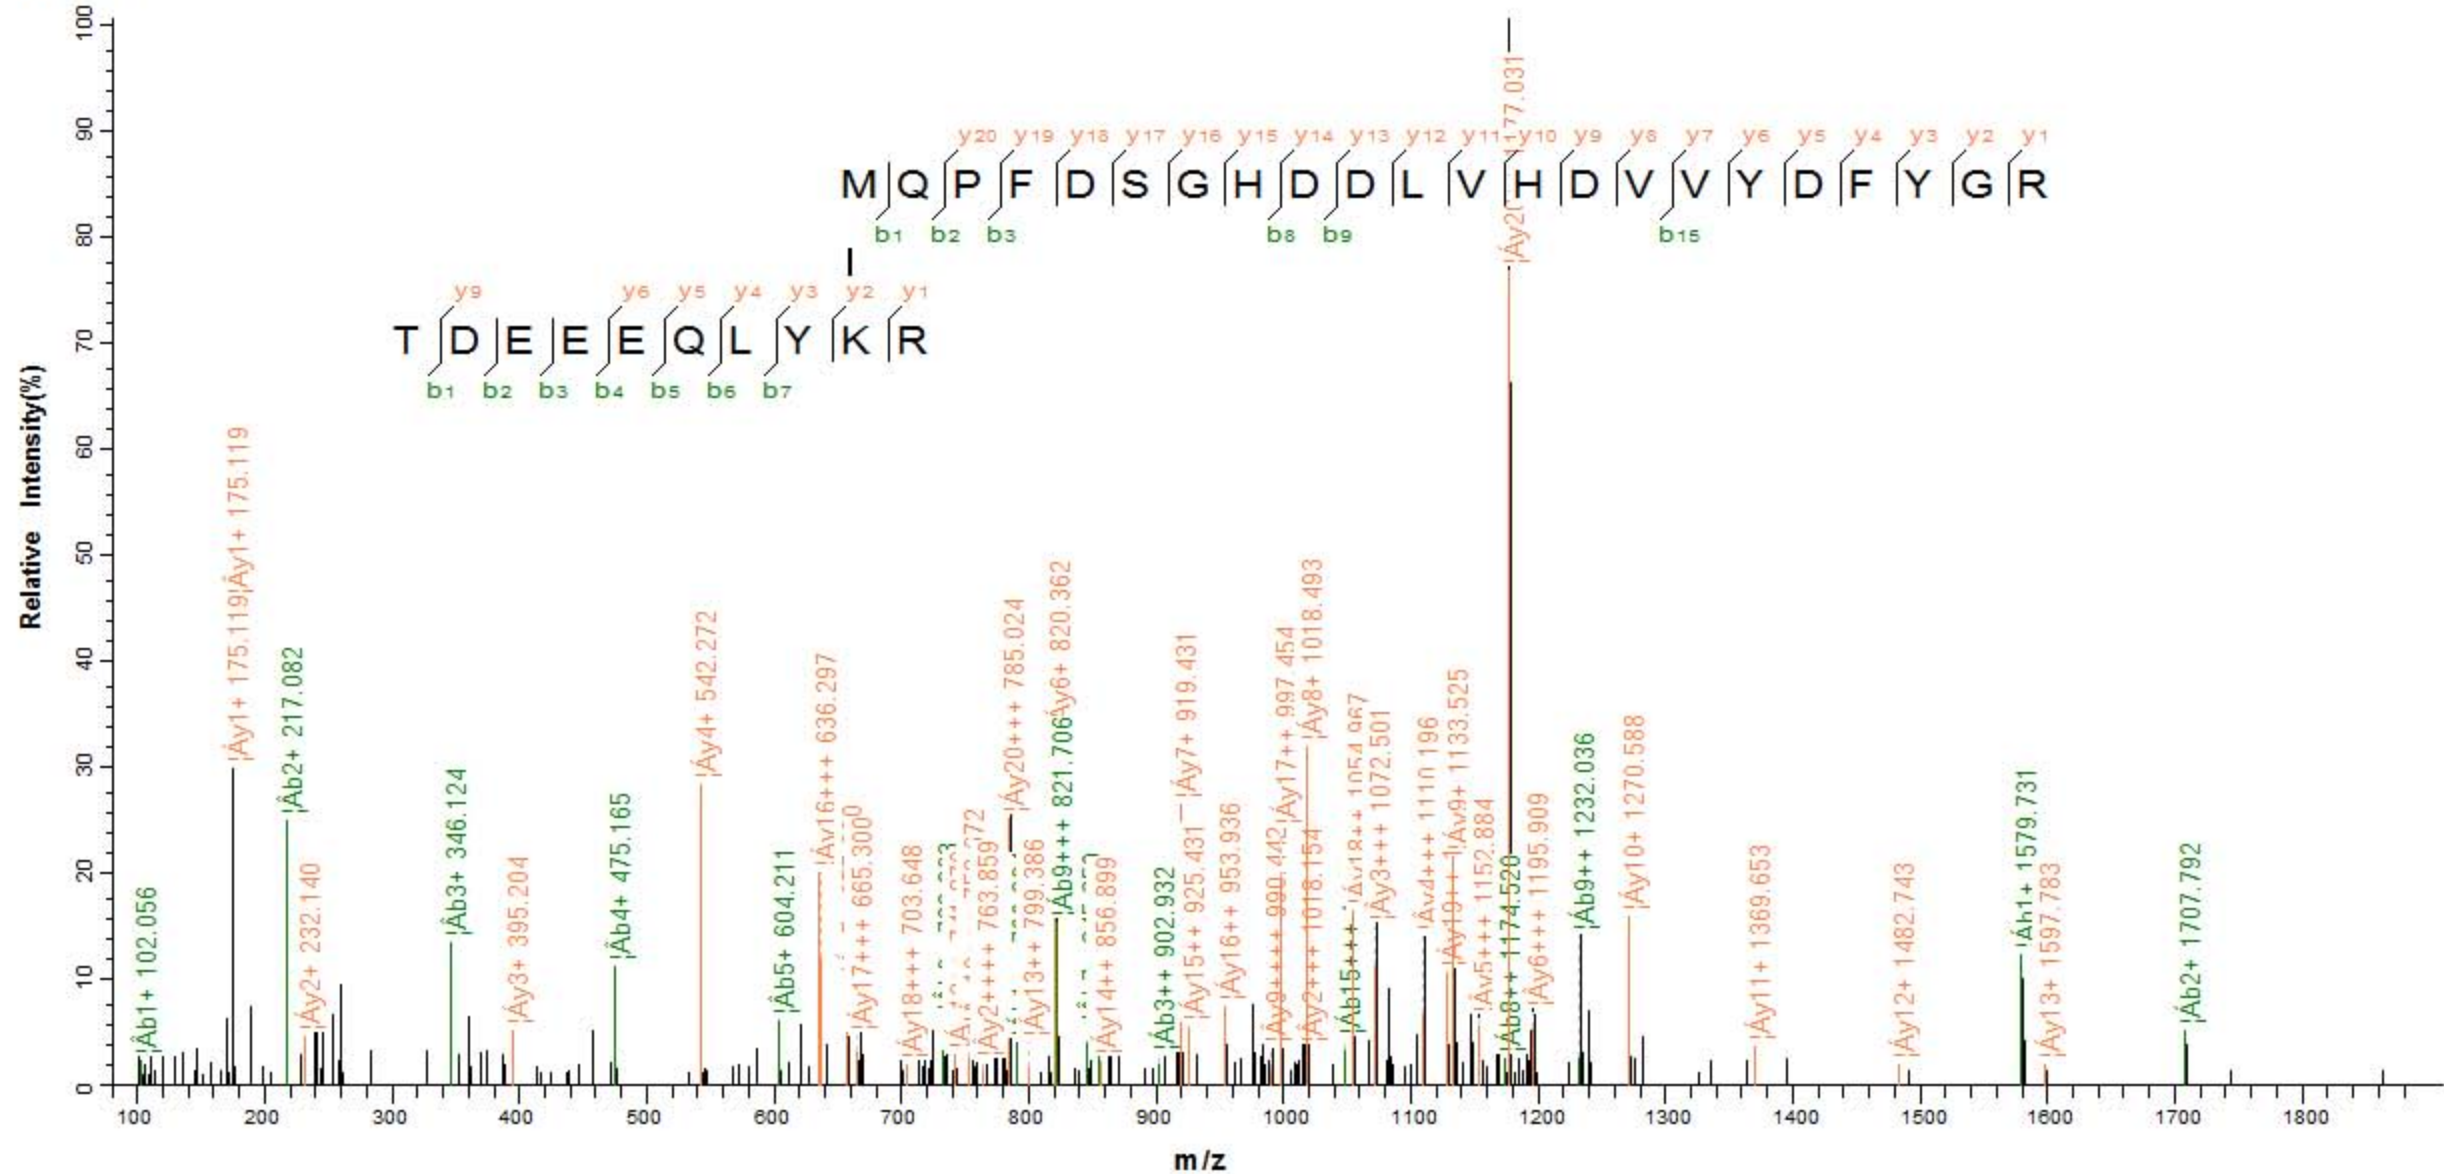

3.7e+003

Relative Intensity(%)

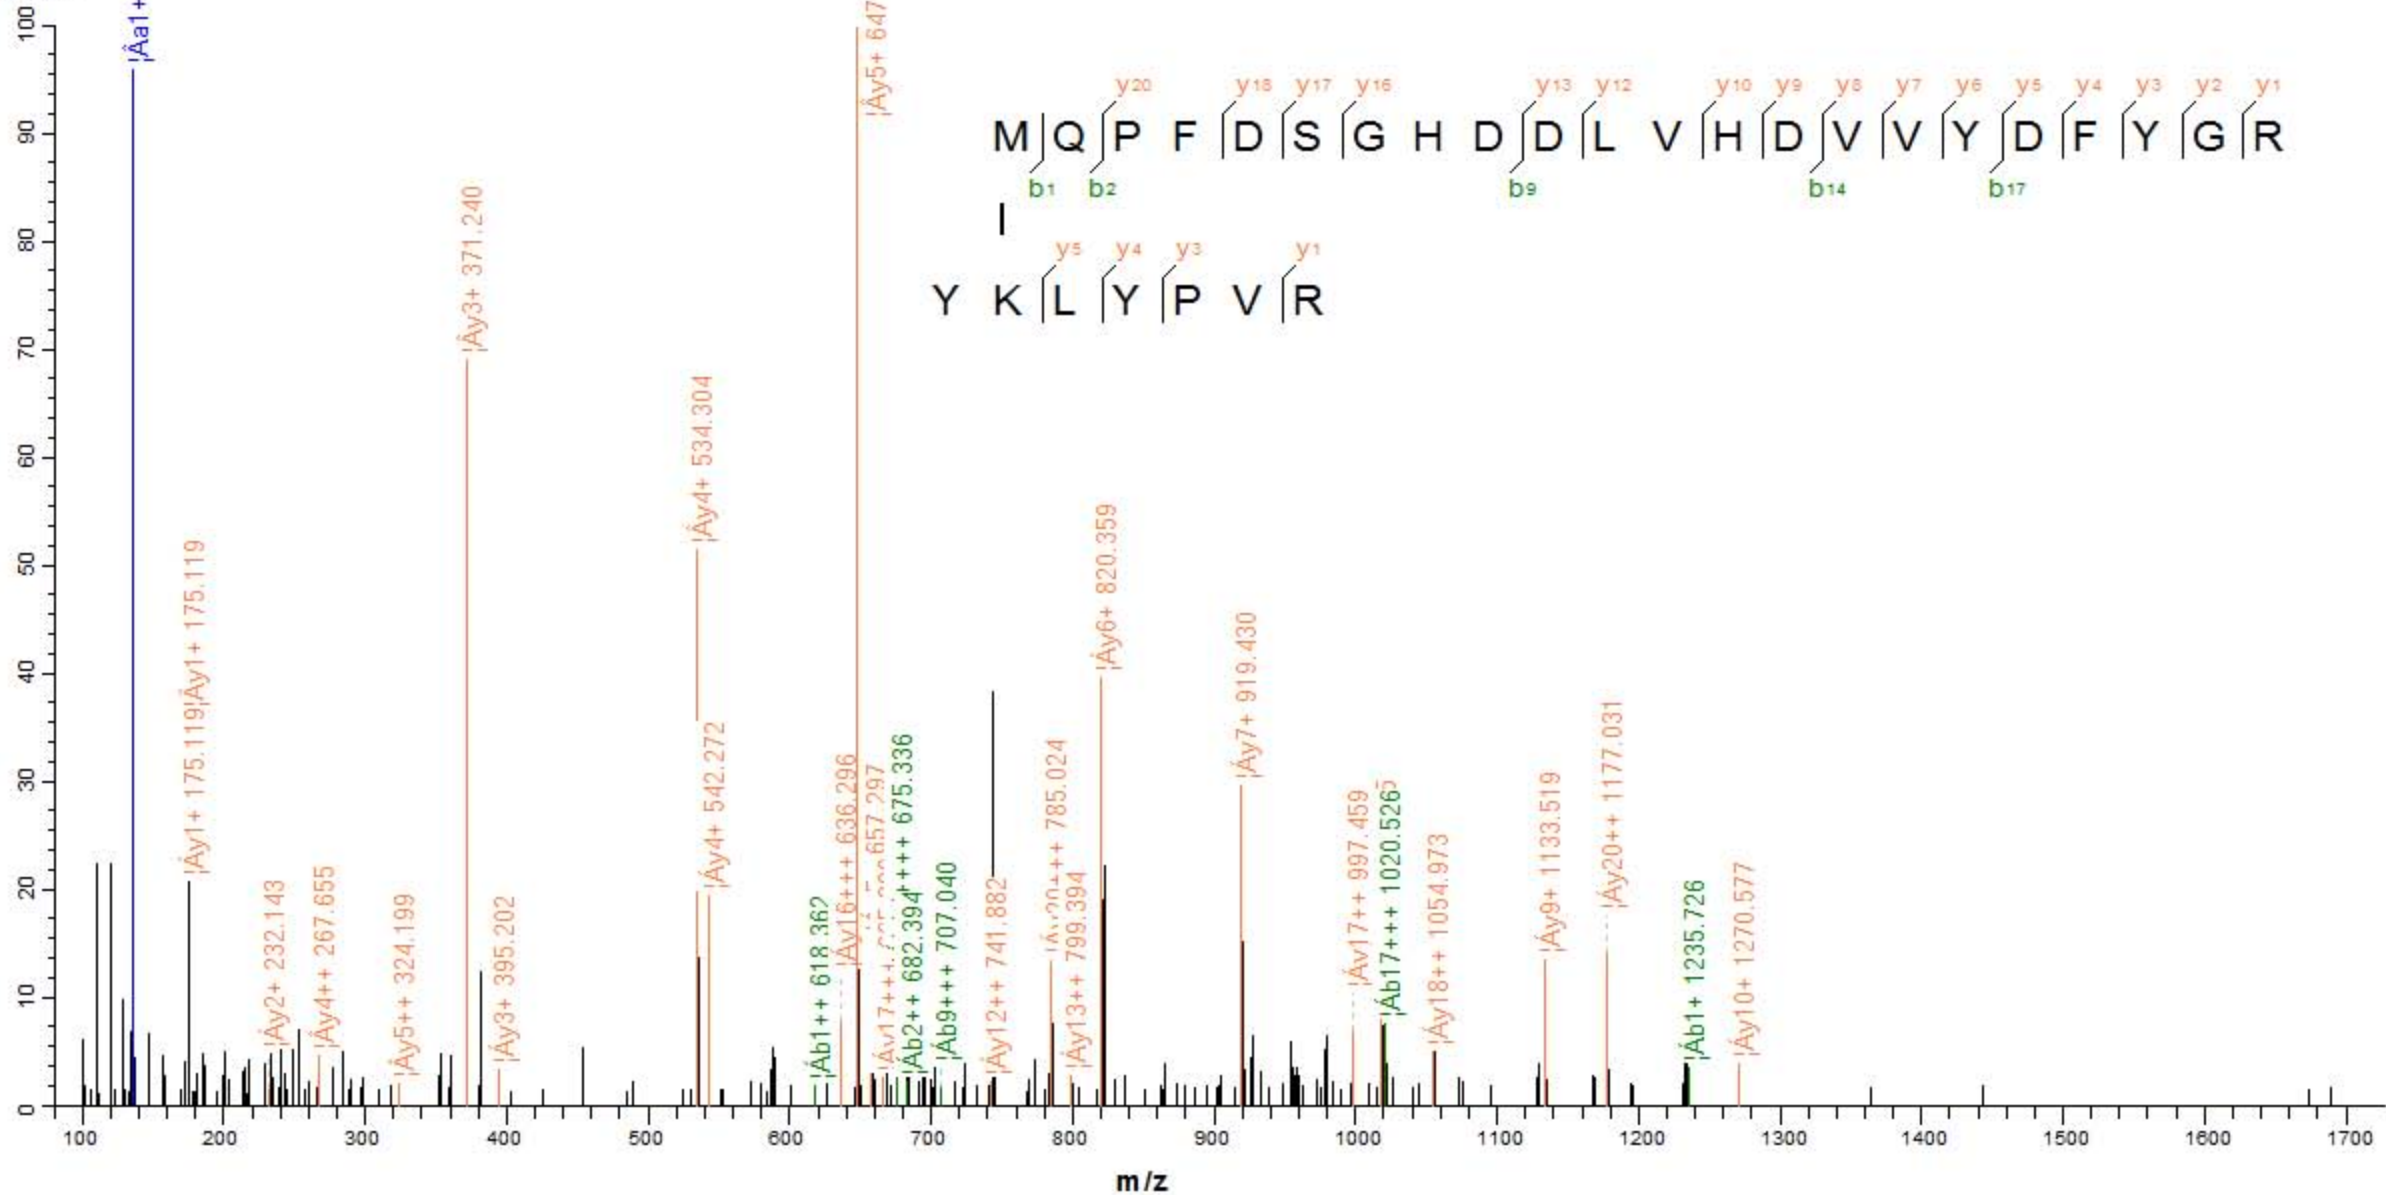

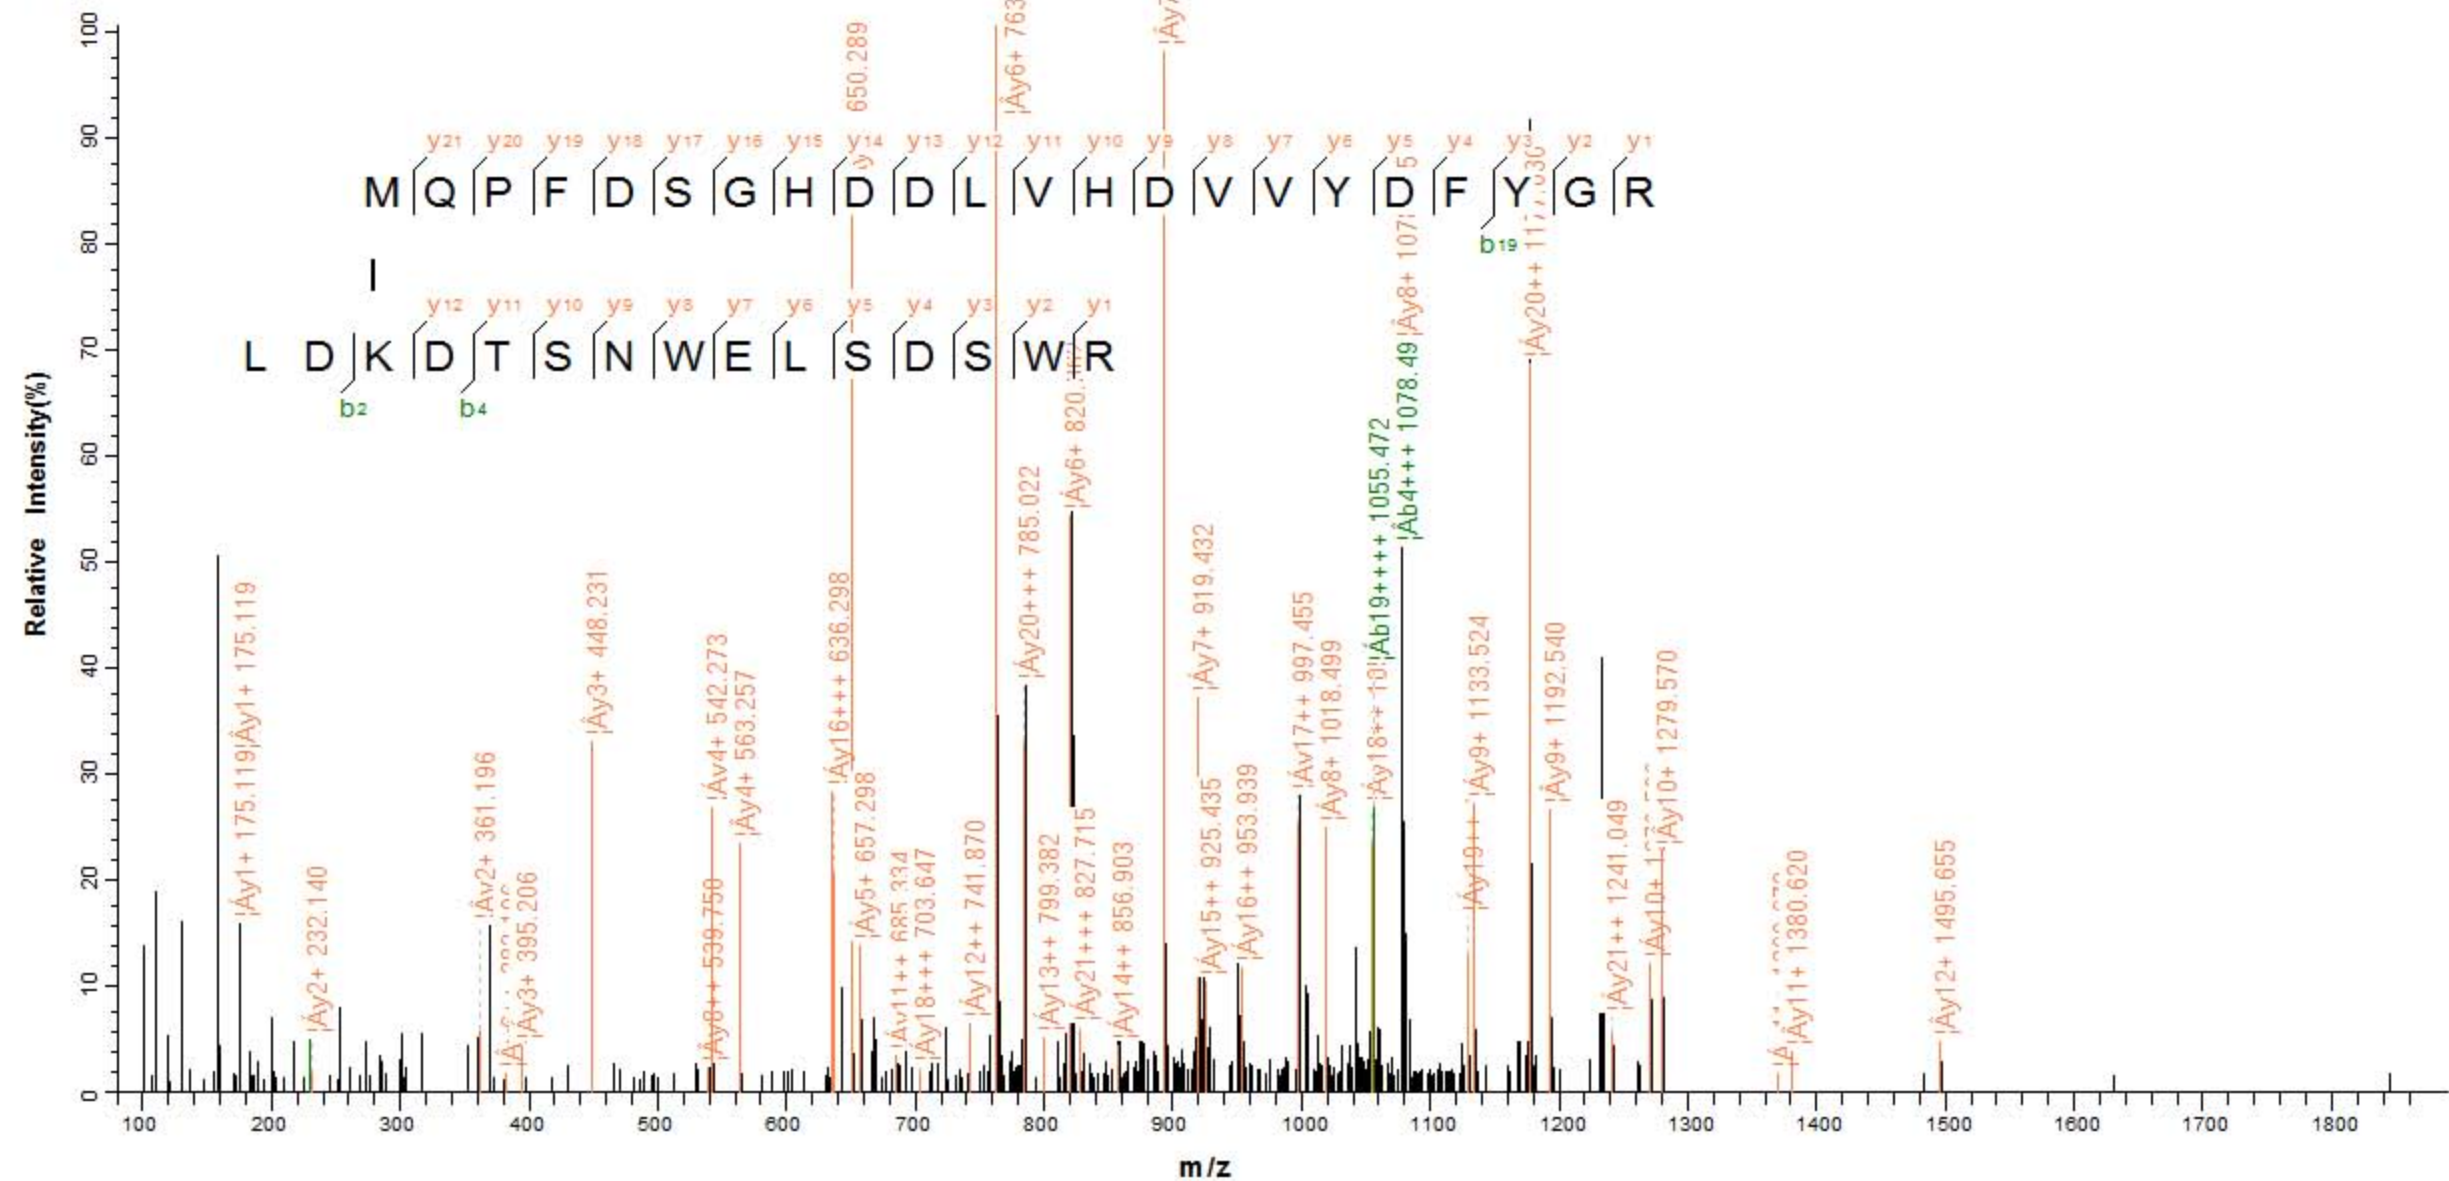

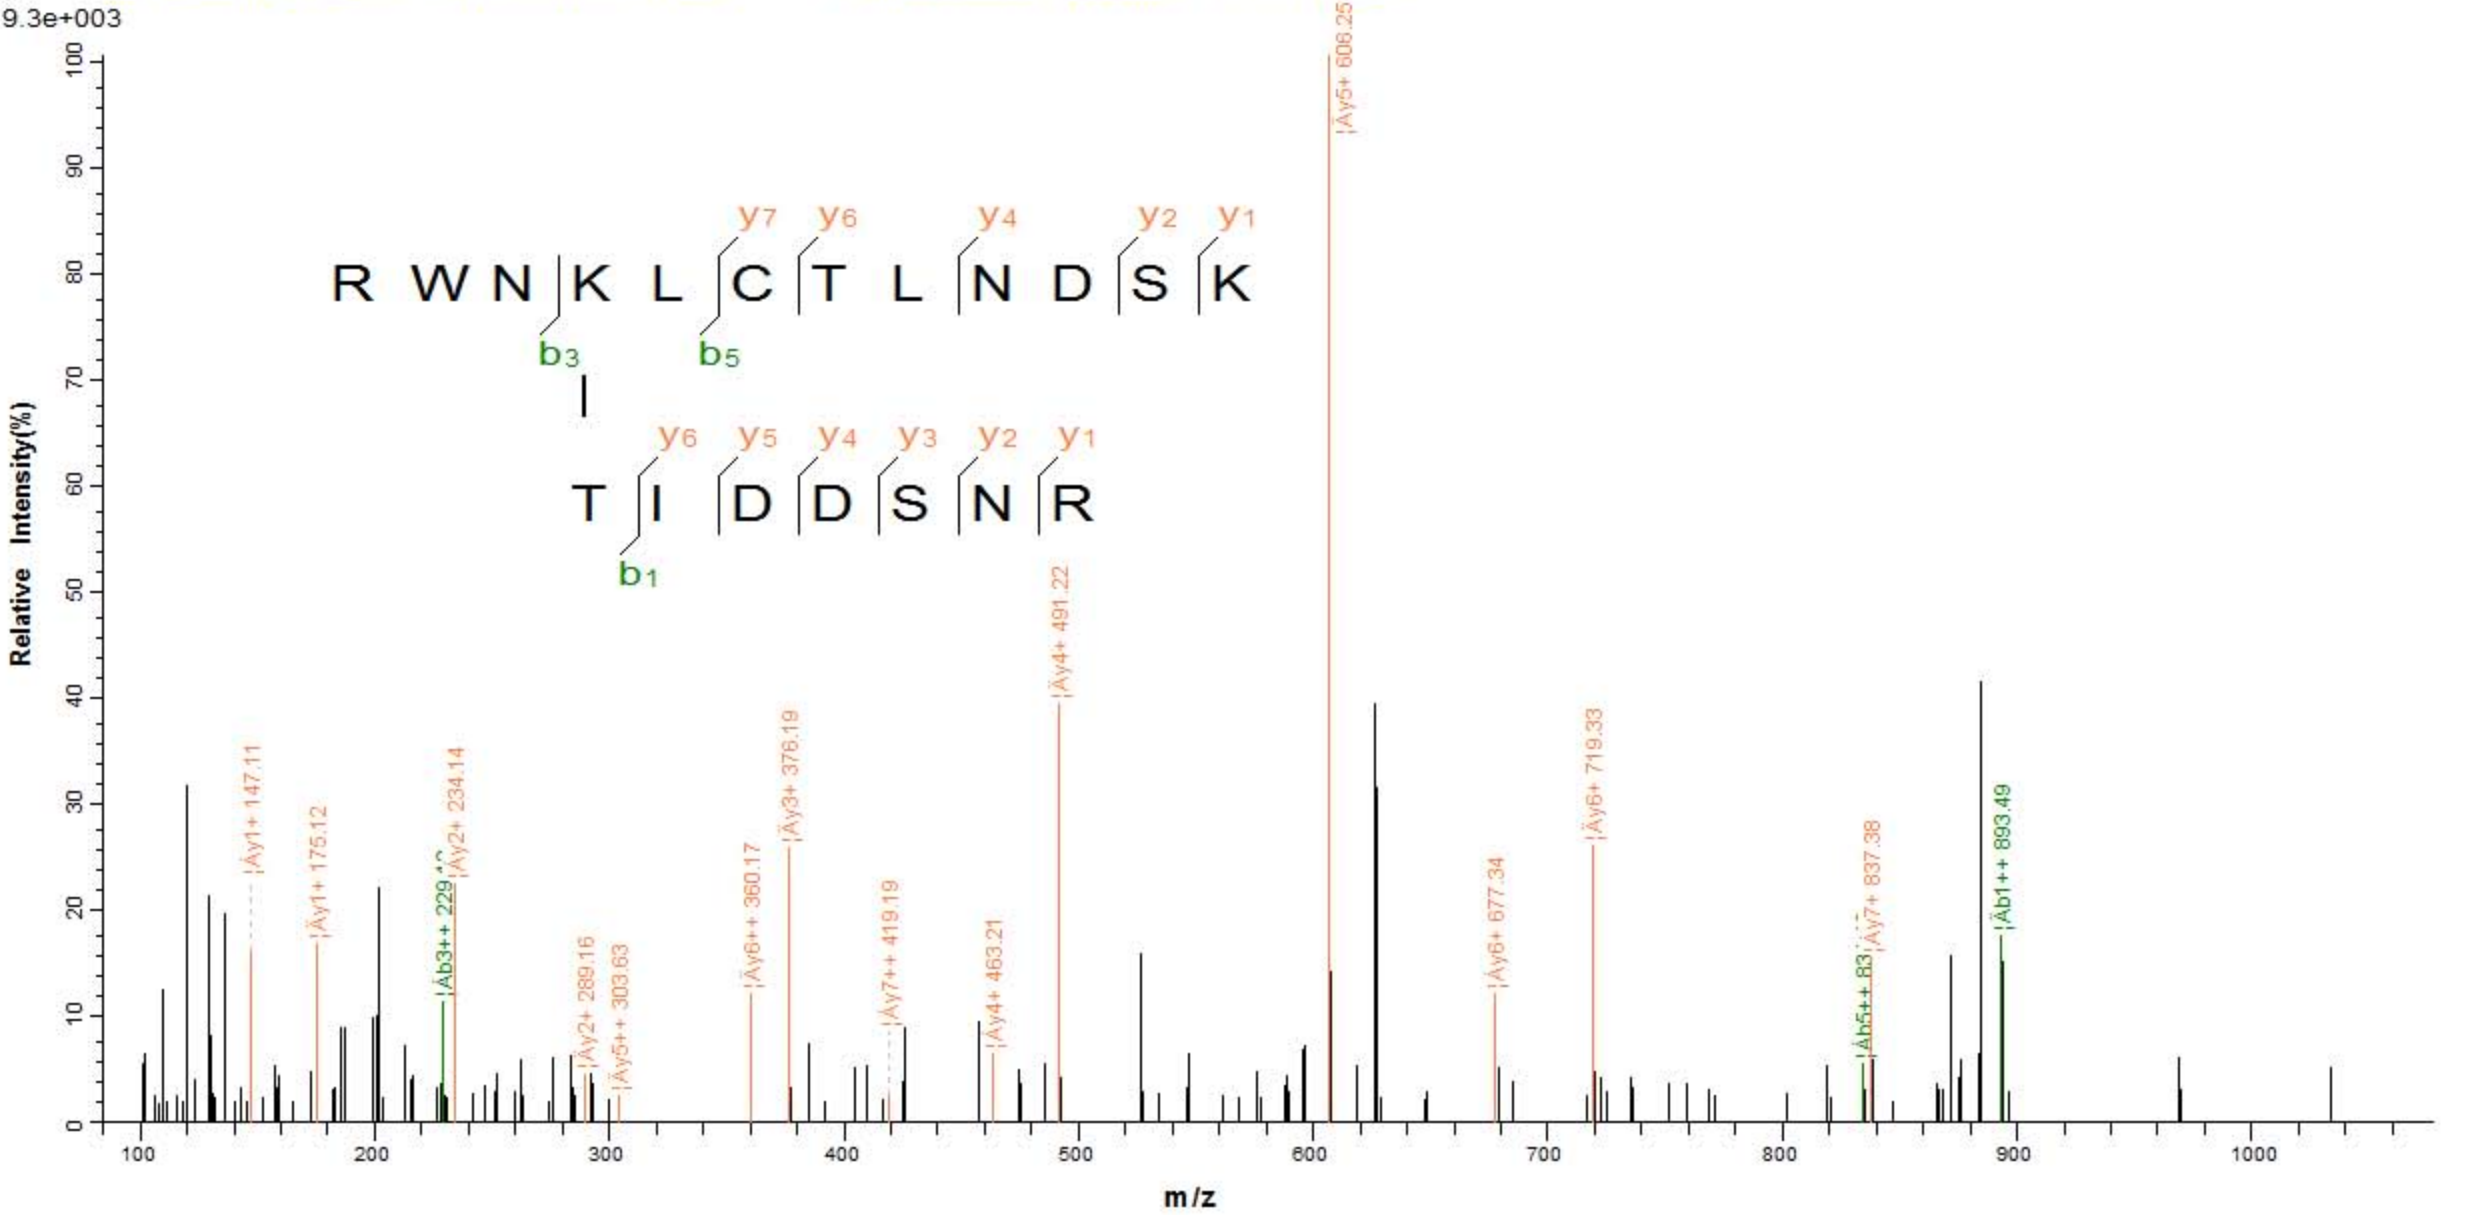

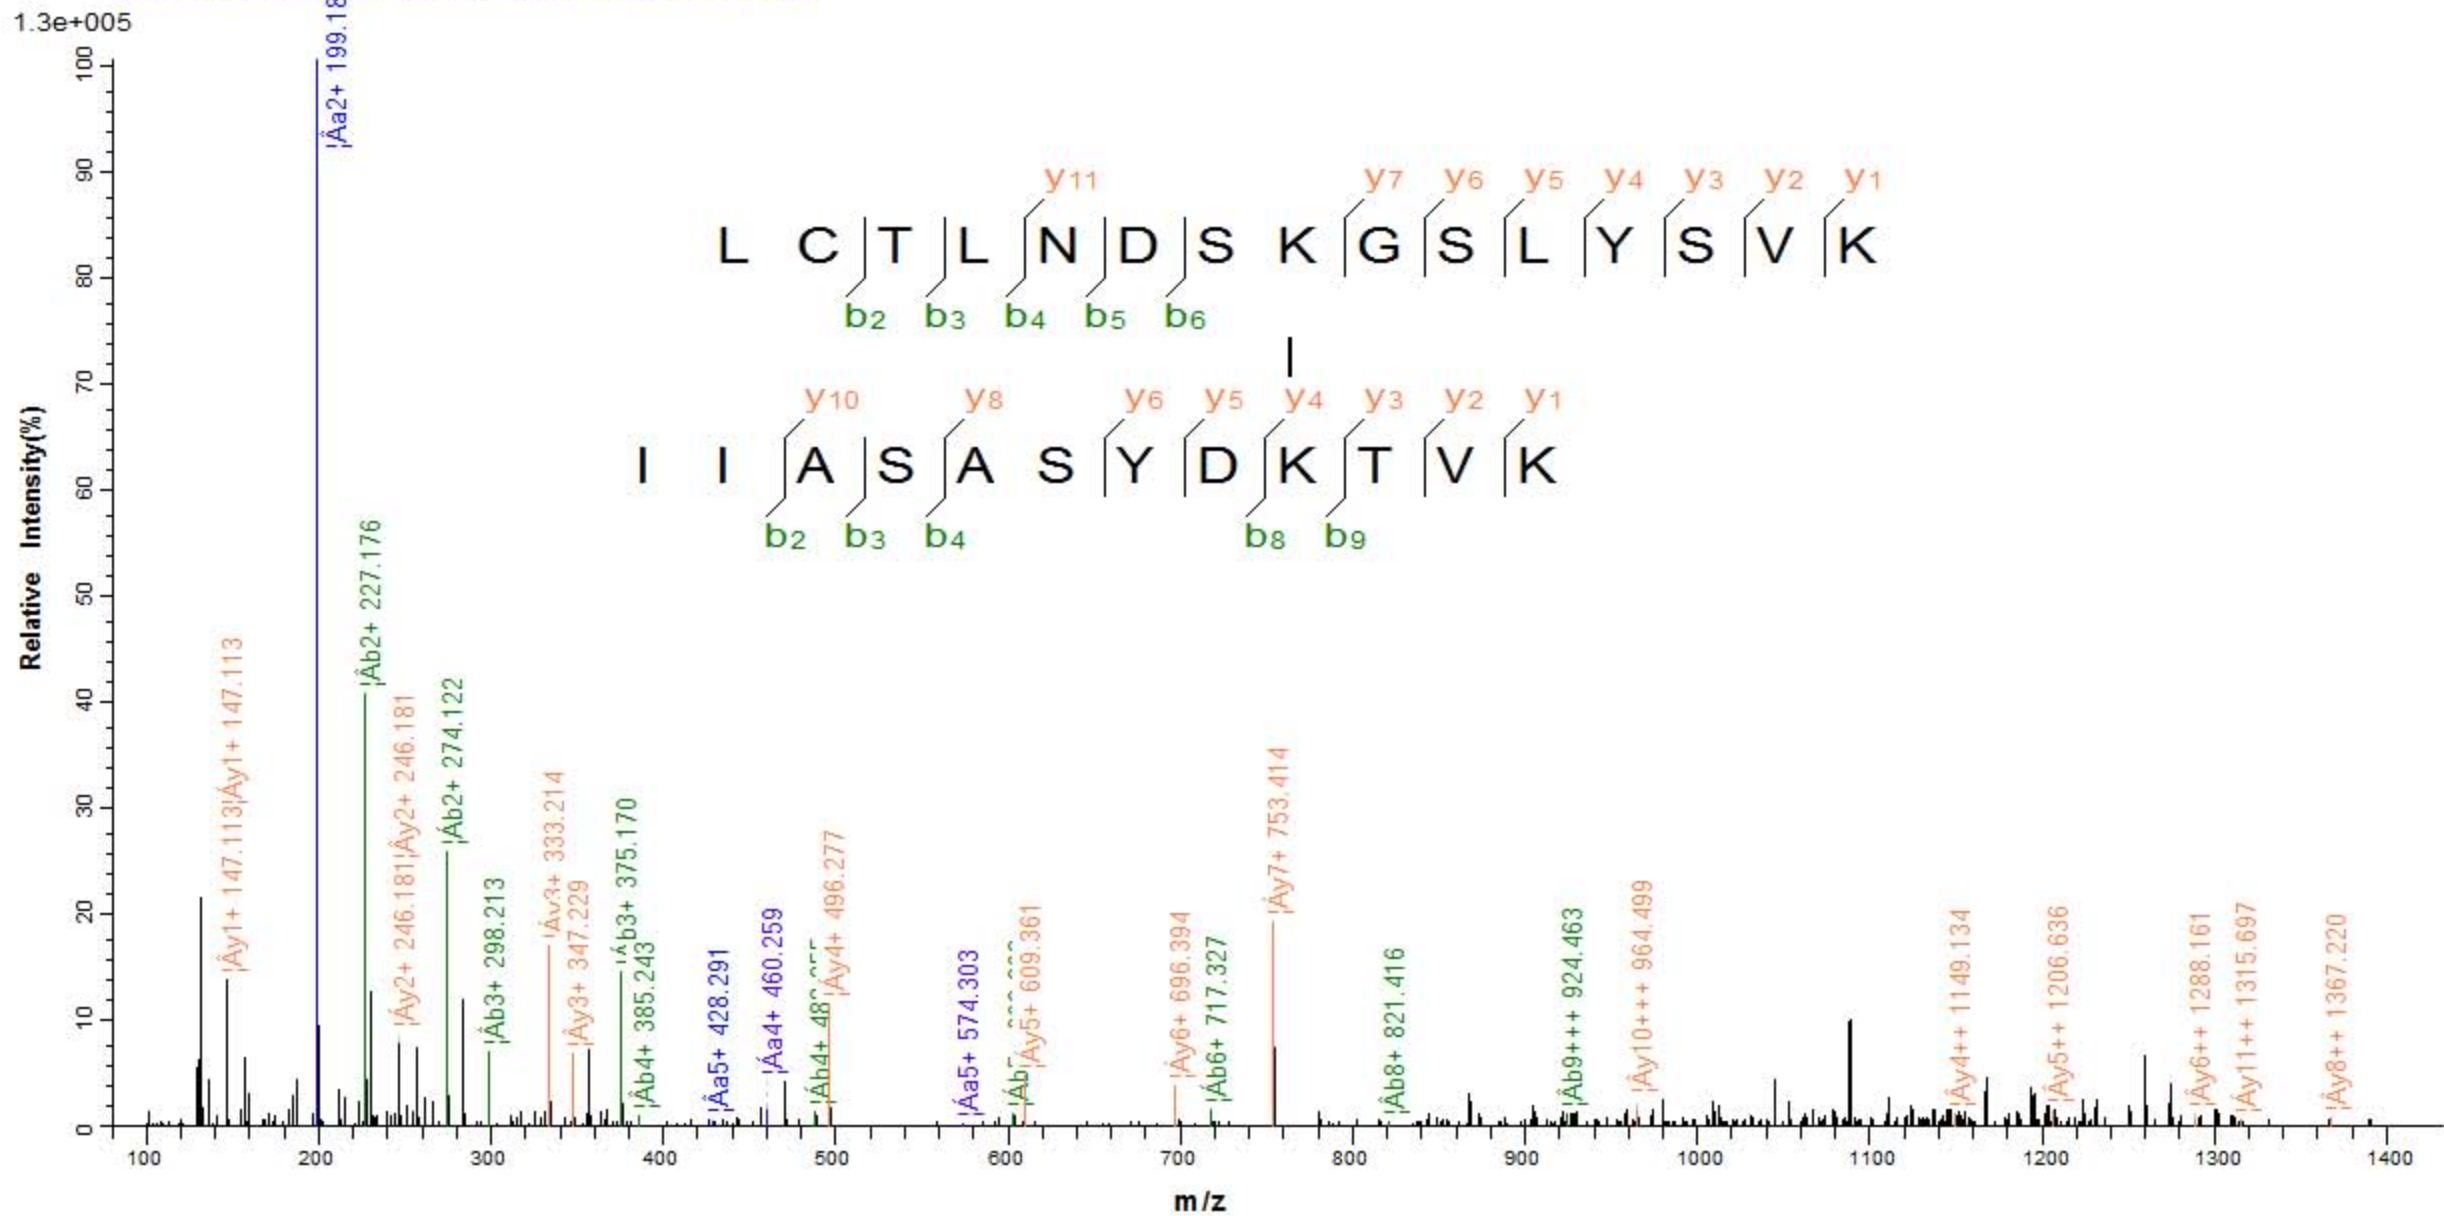

2.4e+004

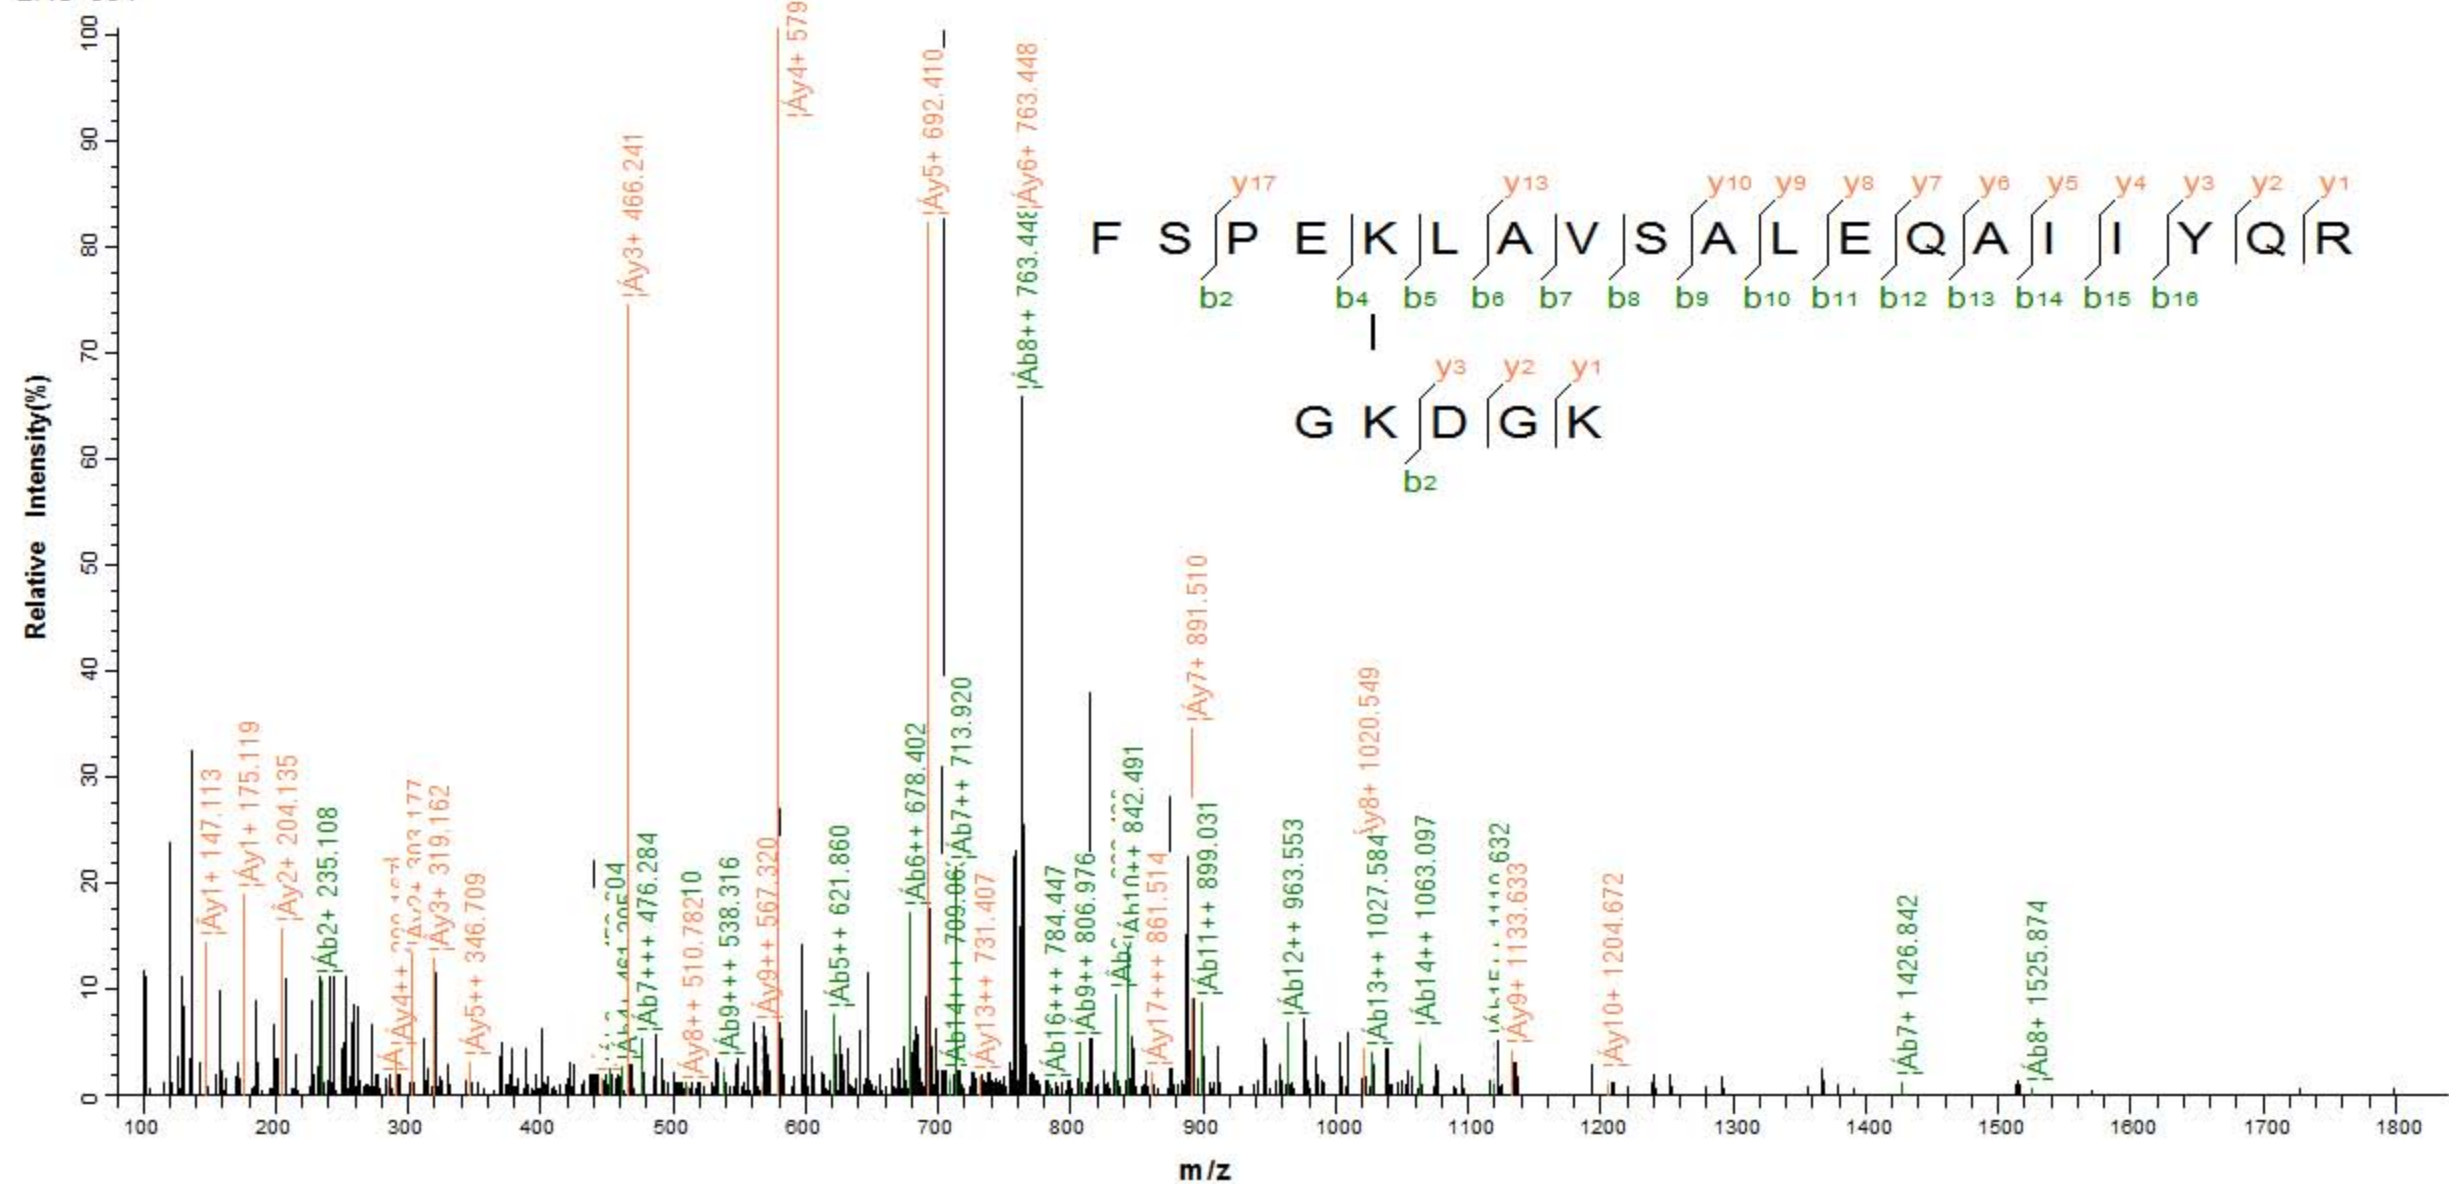

1.4e+004

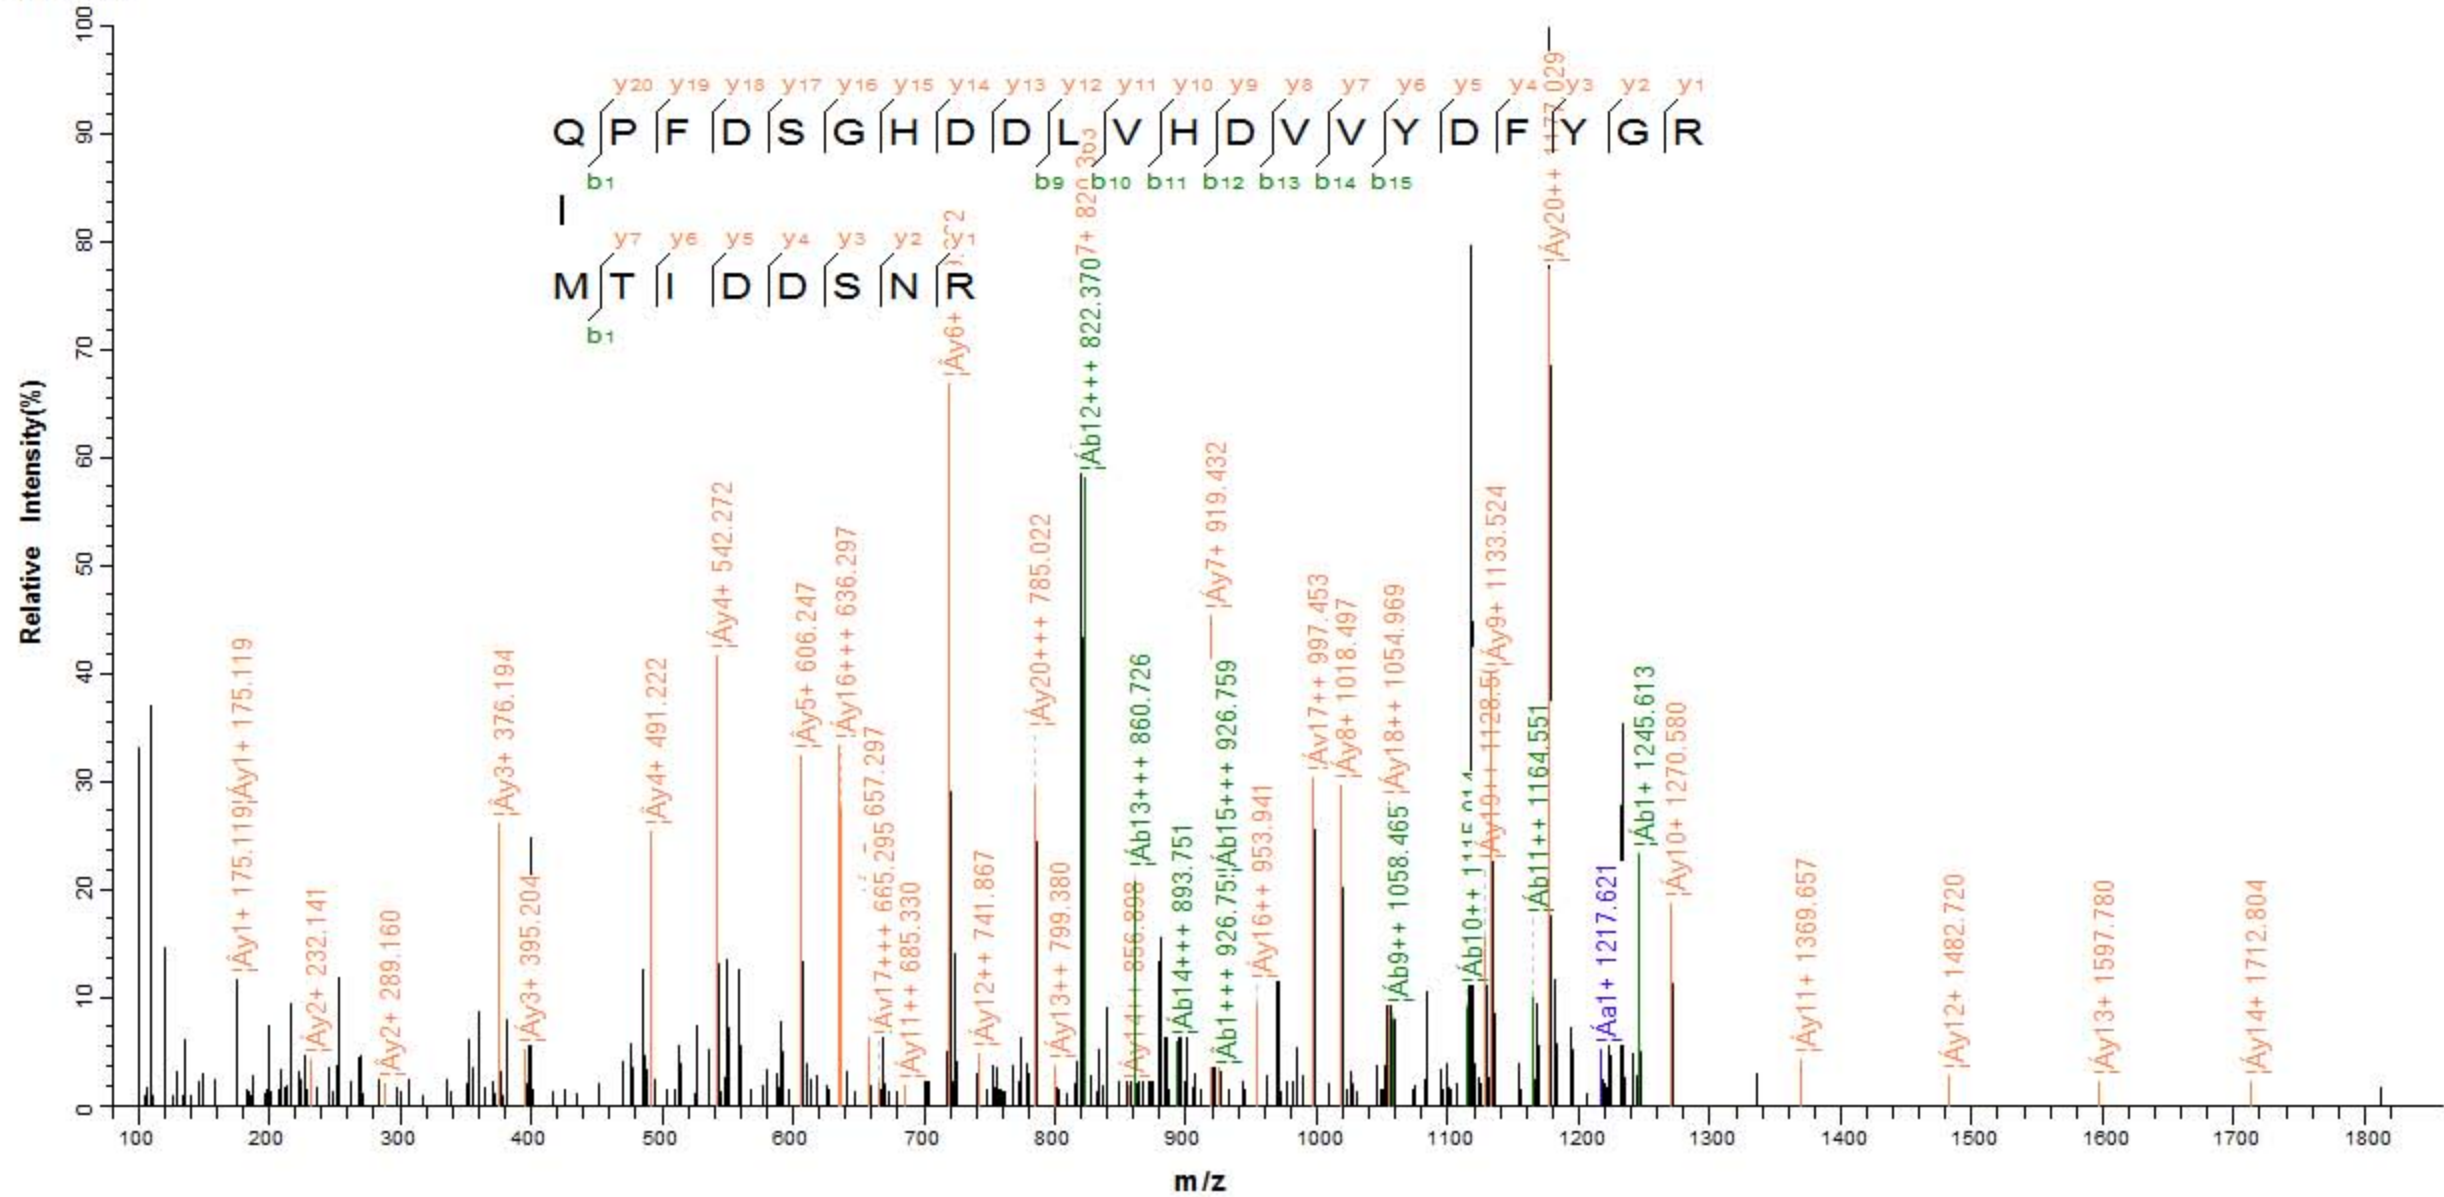

3.6e+004

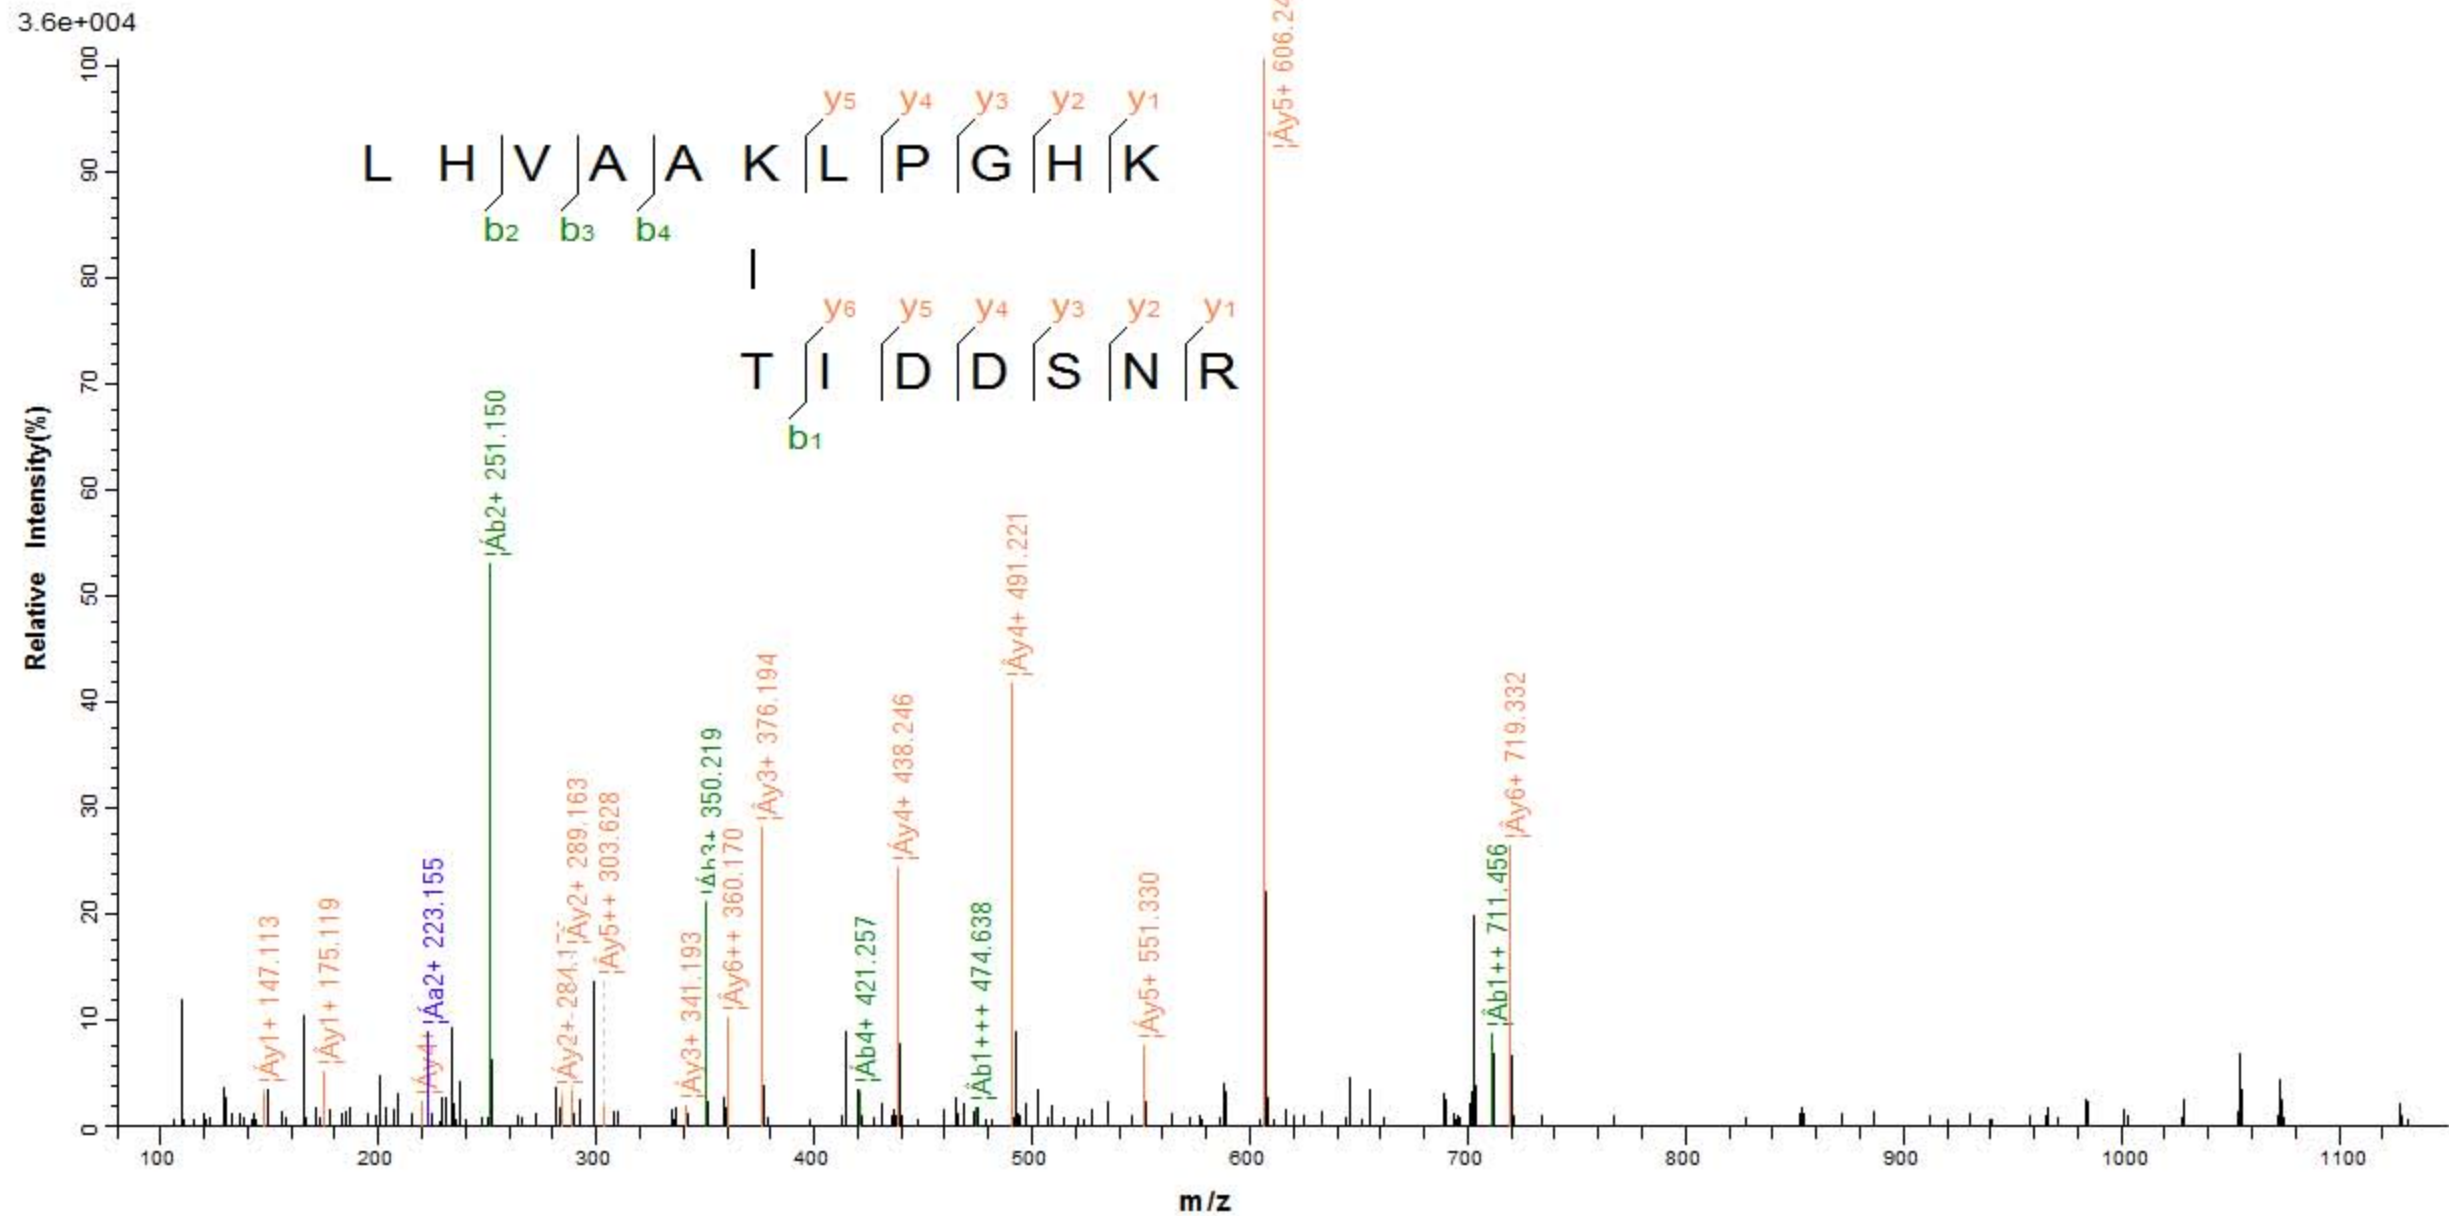



8.4e+003

Relative Intensity(%)

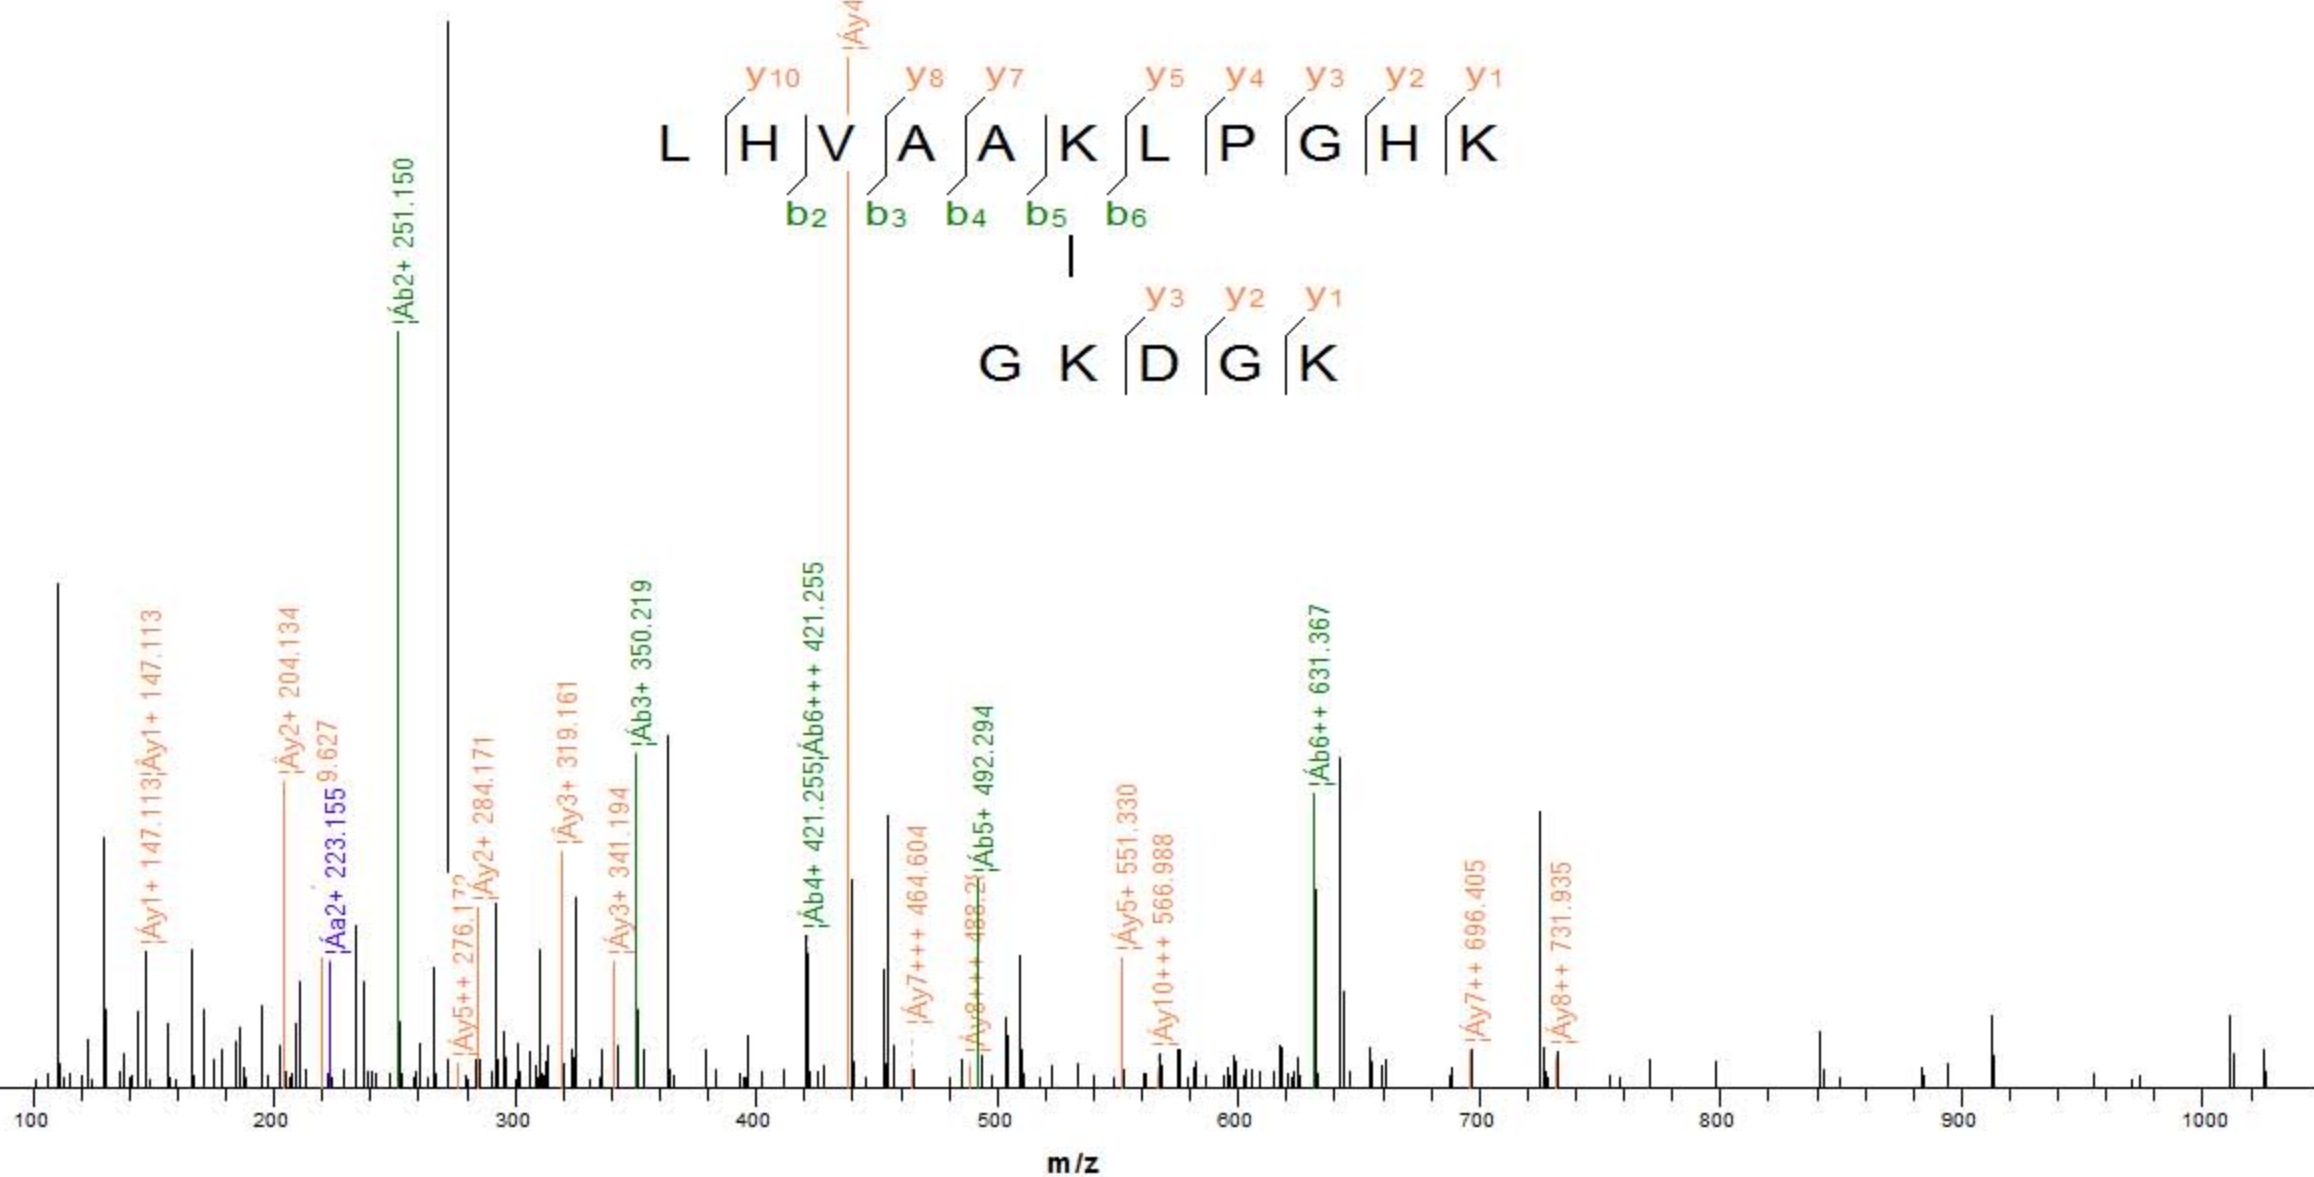

2.8e+004

Relative Intensity(%)

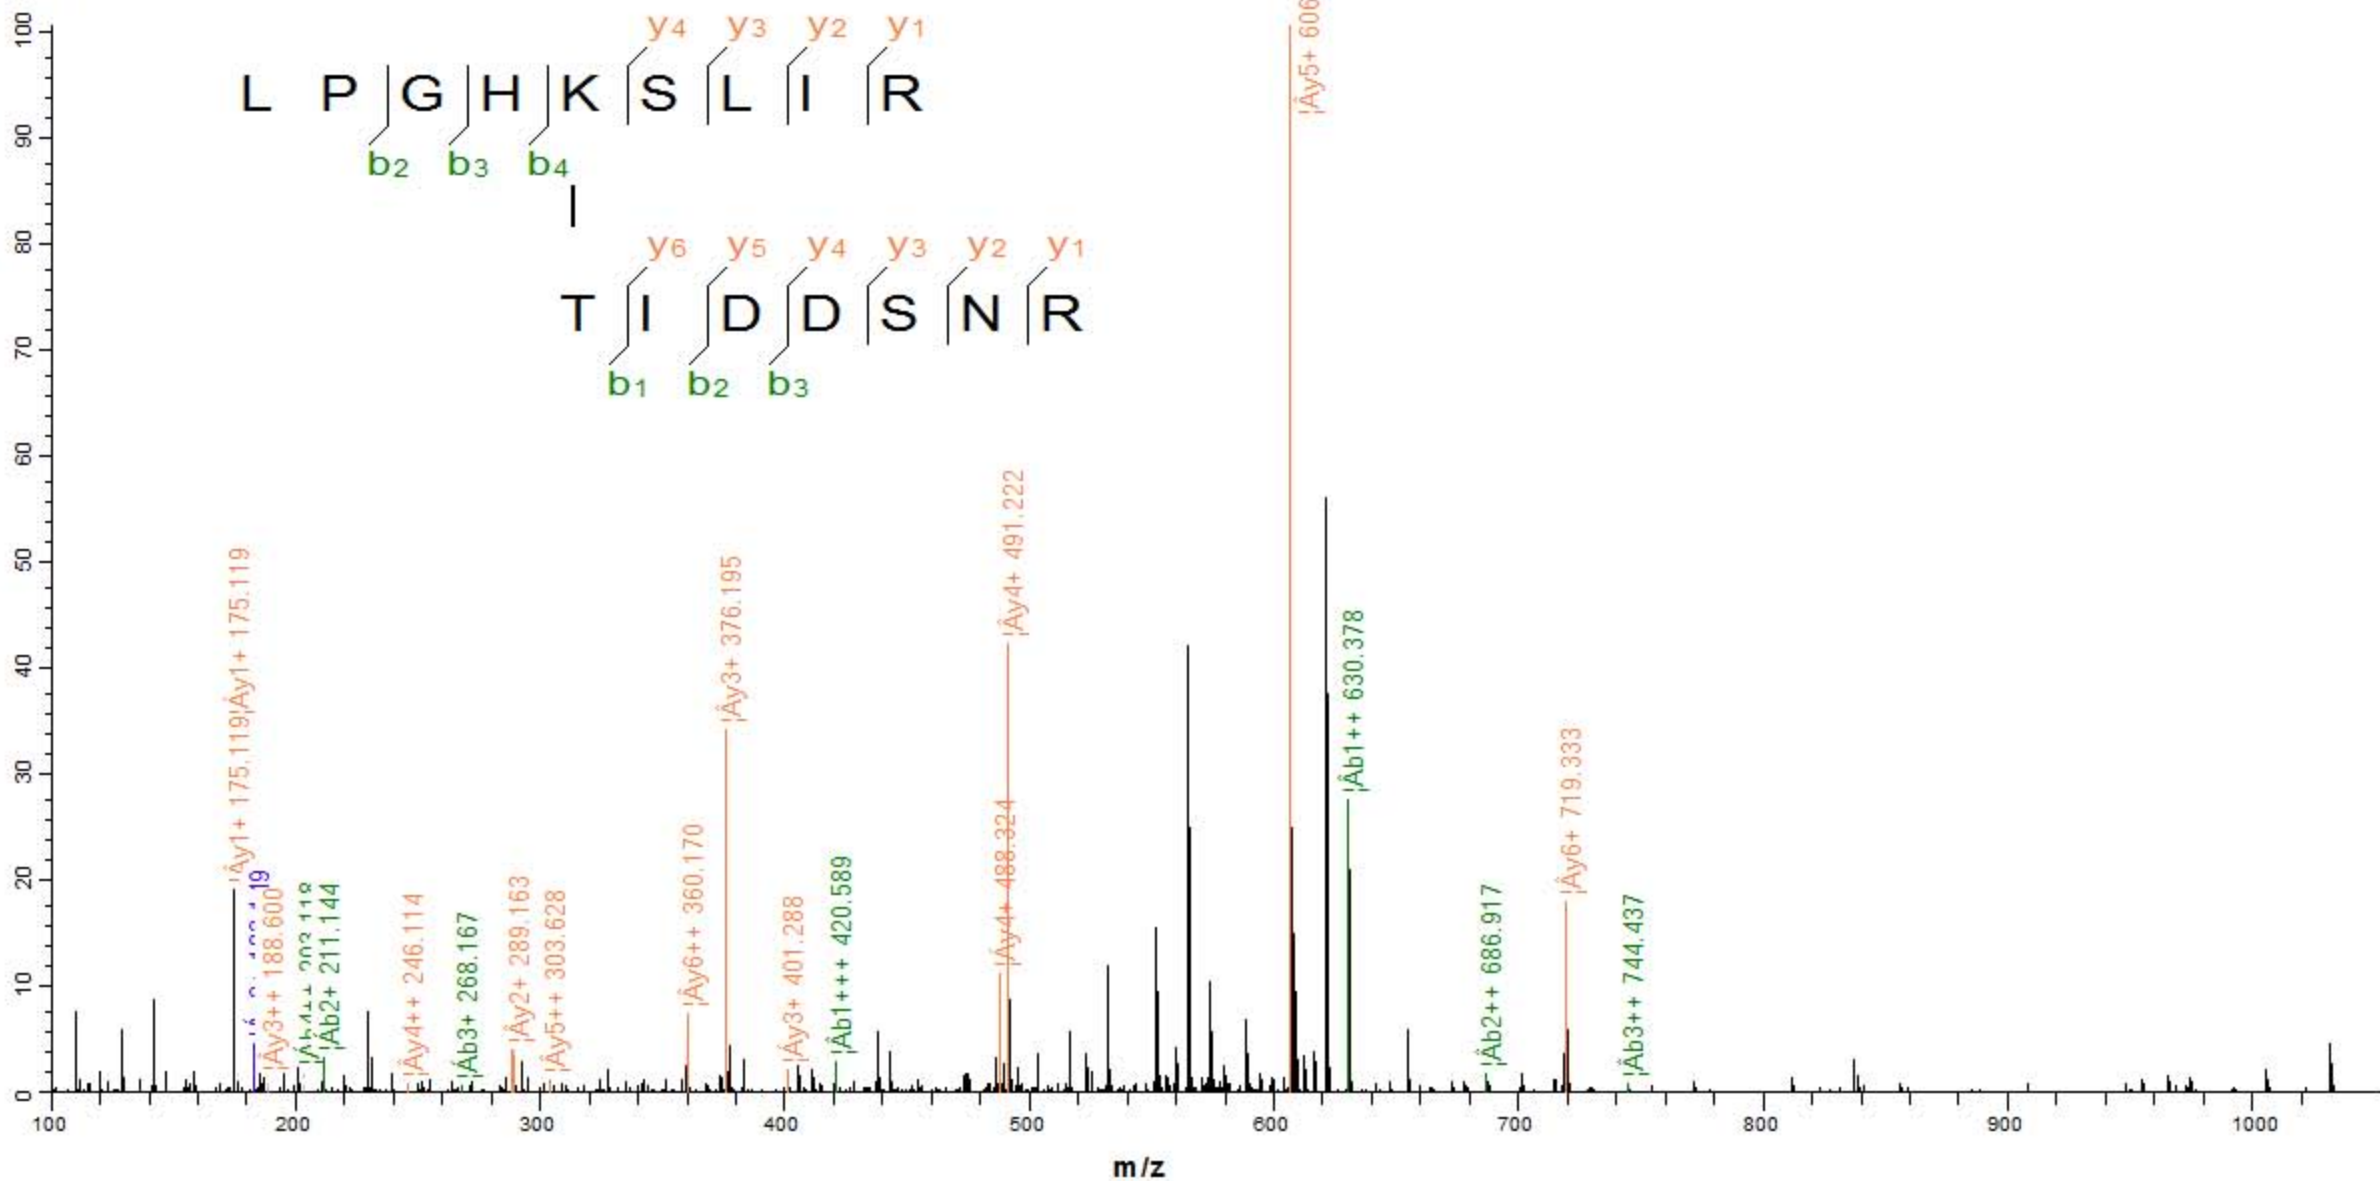

8.1e+003

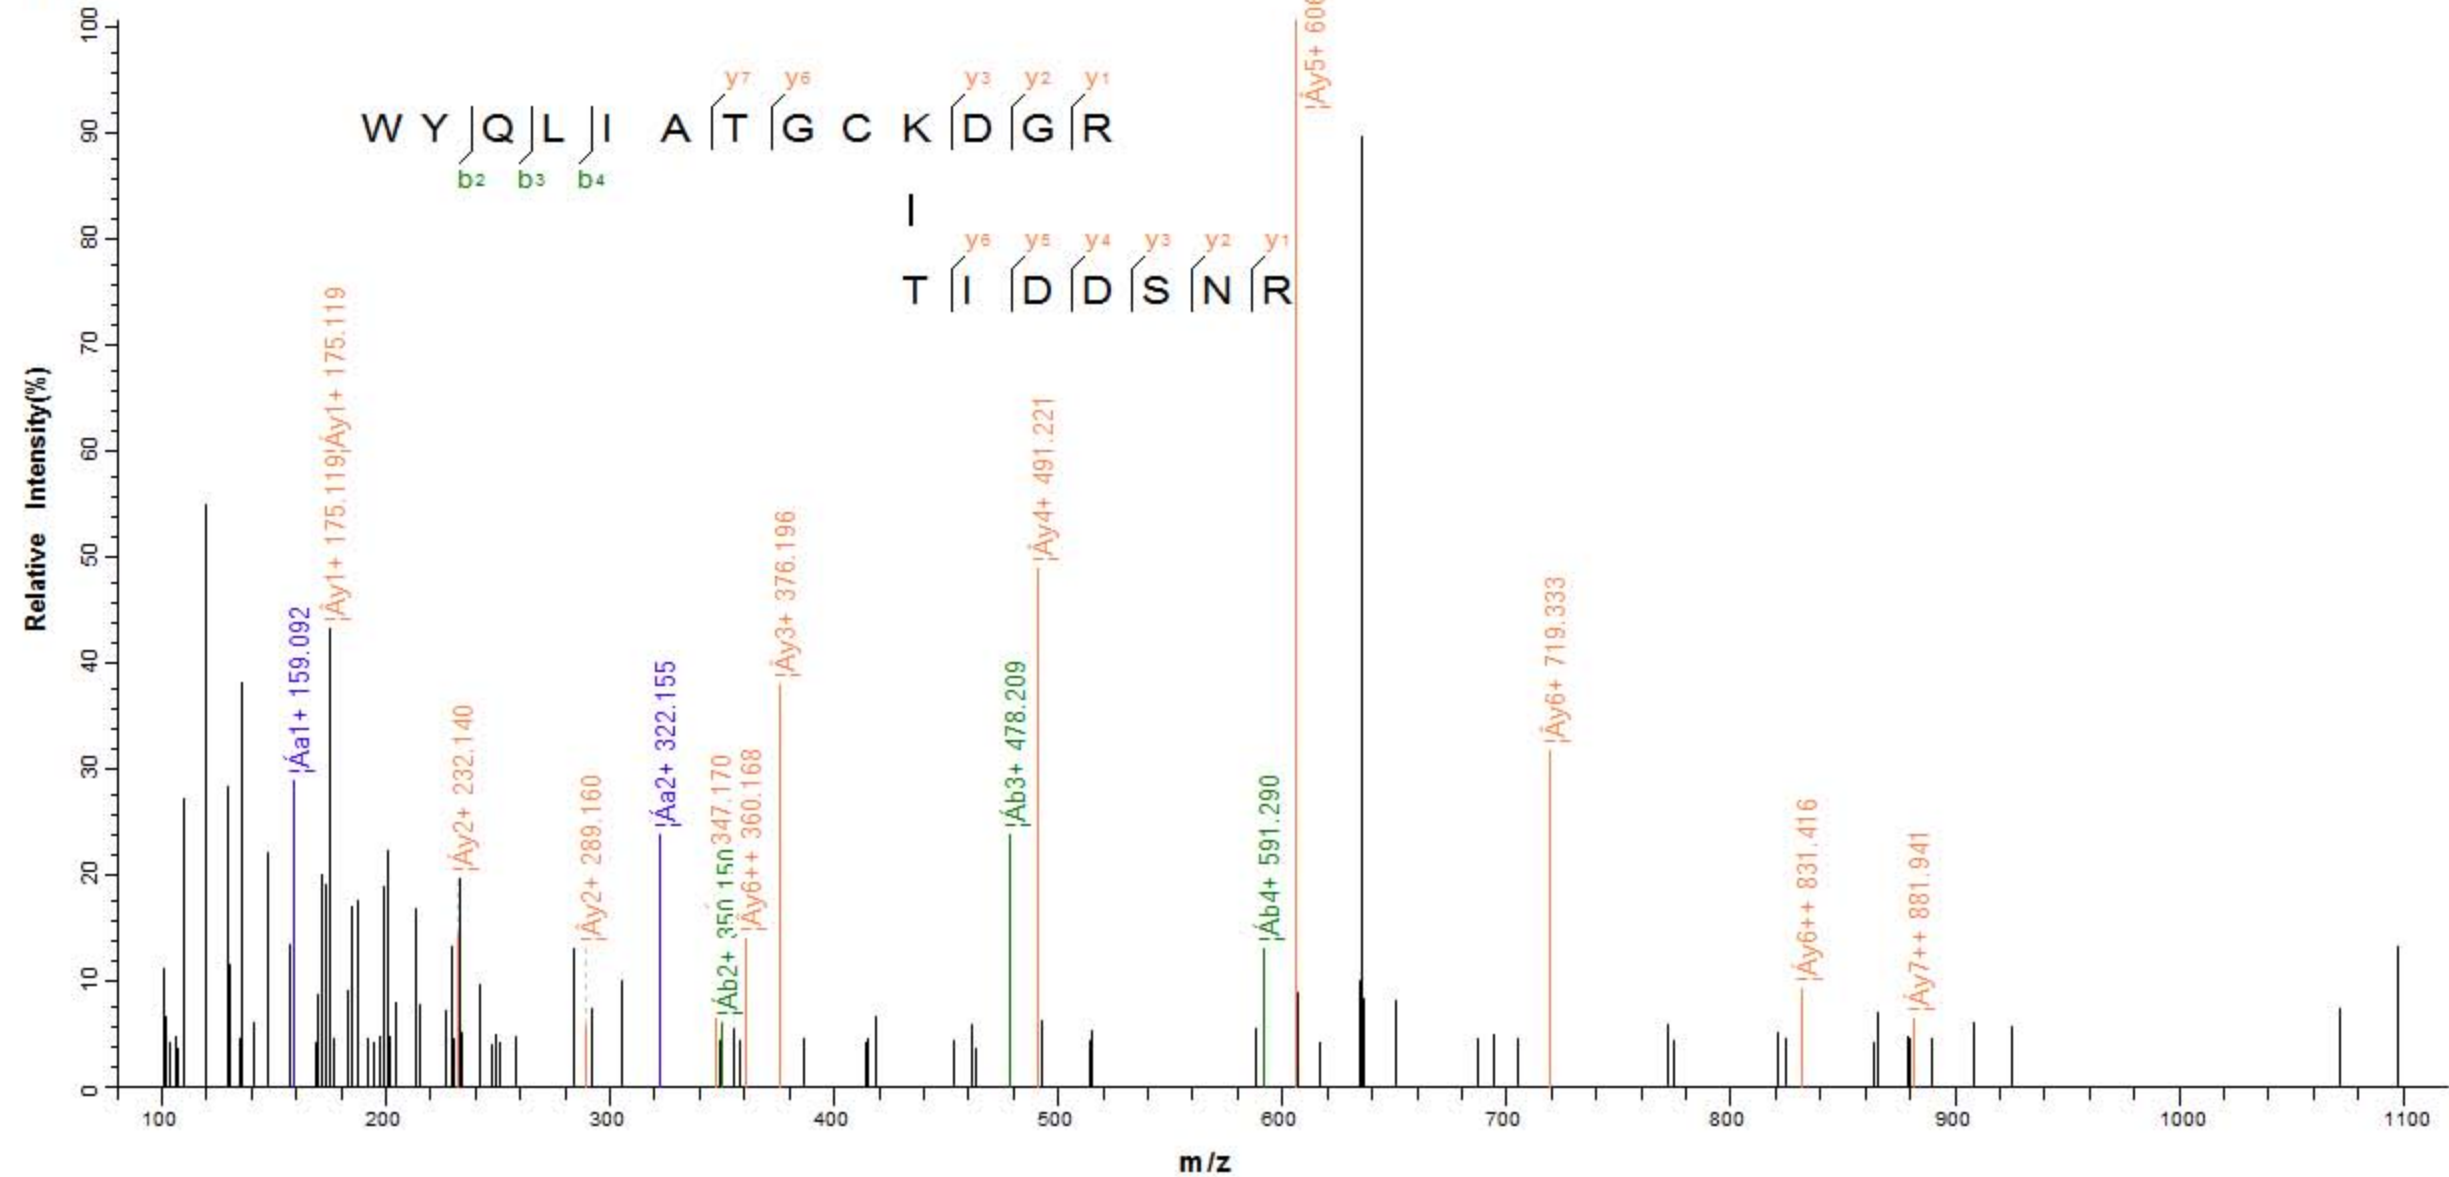

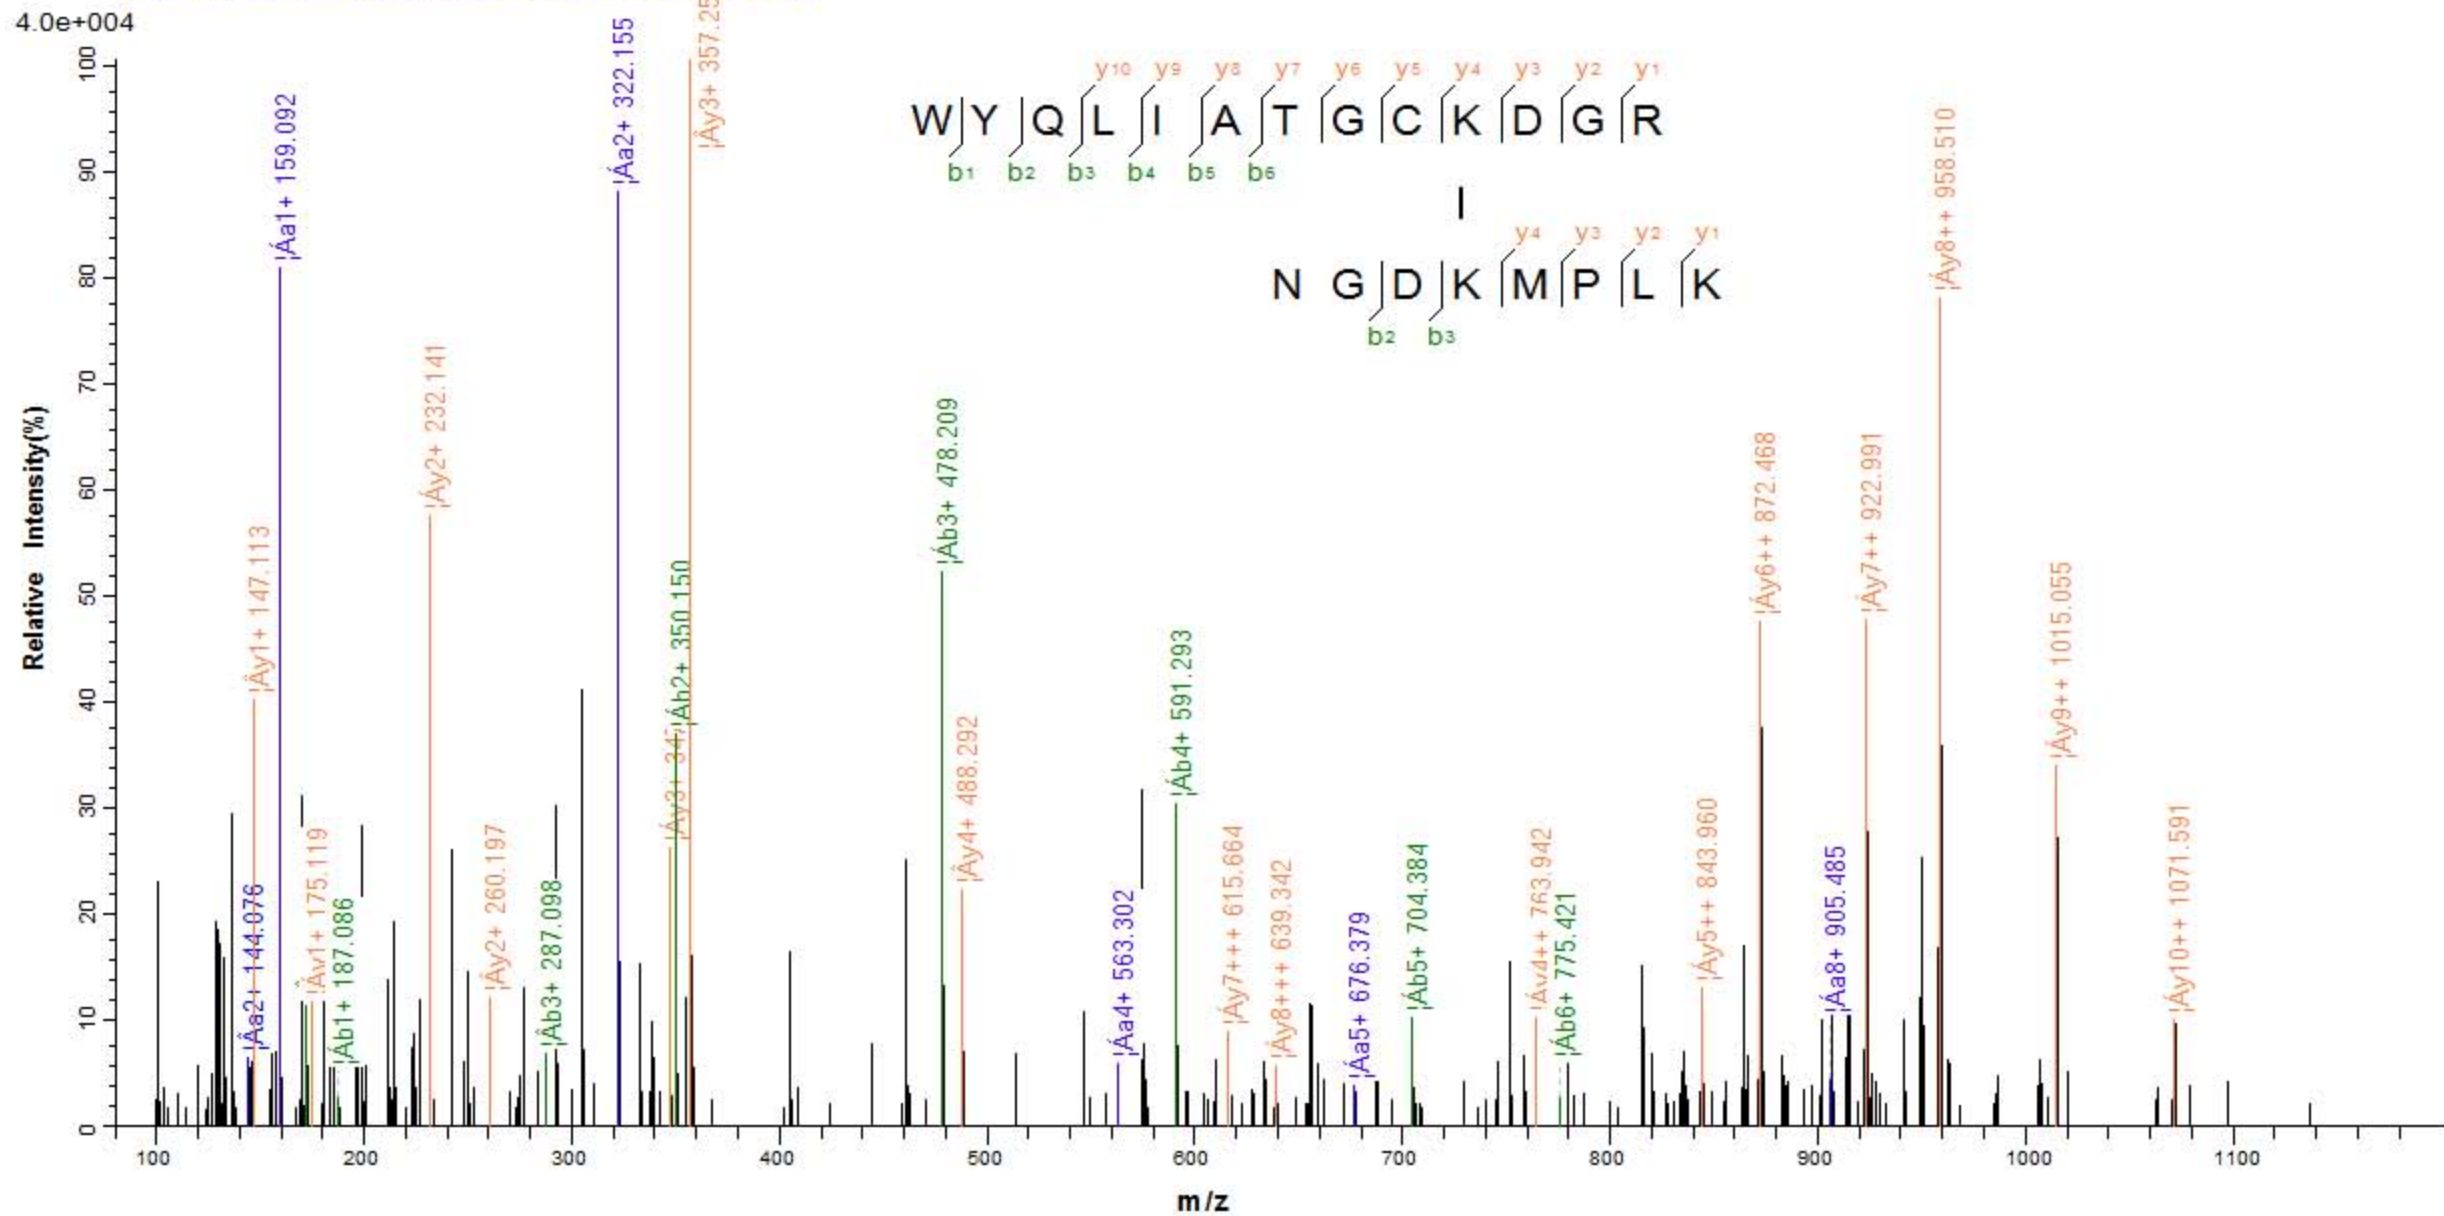

W | Y | Q | L | I | A | T | G | C | K | D | G | R

b<sub>1</sub> b<sub>2</sub> b<sub>3</sub> b<sub>4</sub> b<sub>5</sub> b<sub>6</sub> b<sub>10</sub> b<sub>11</sub>

L | P | G | H | K | S | L | I | R

y<sub>3</sub> y<sub>5</sub> y<sub>4</sub> y<sub>3</sub> y<sub>2</sub>

b<sub>2</sub> b<sub>3</sub>

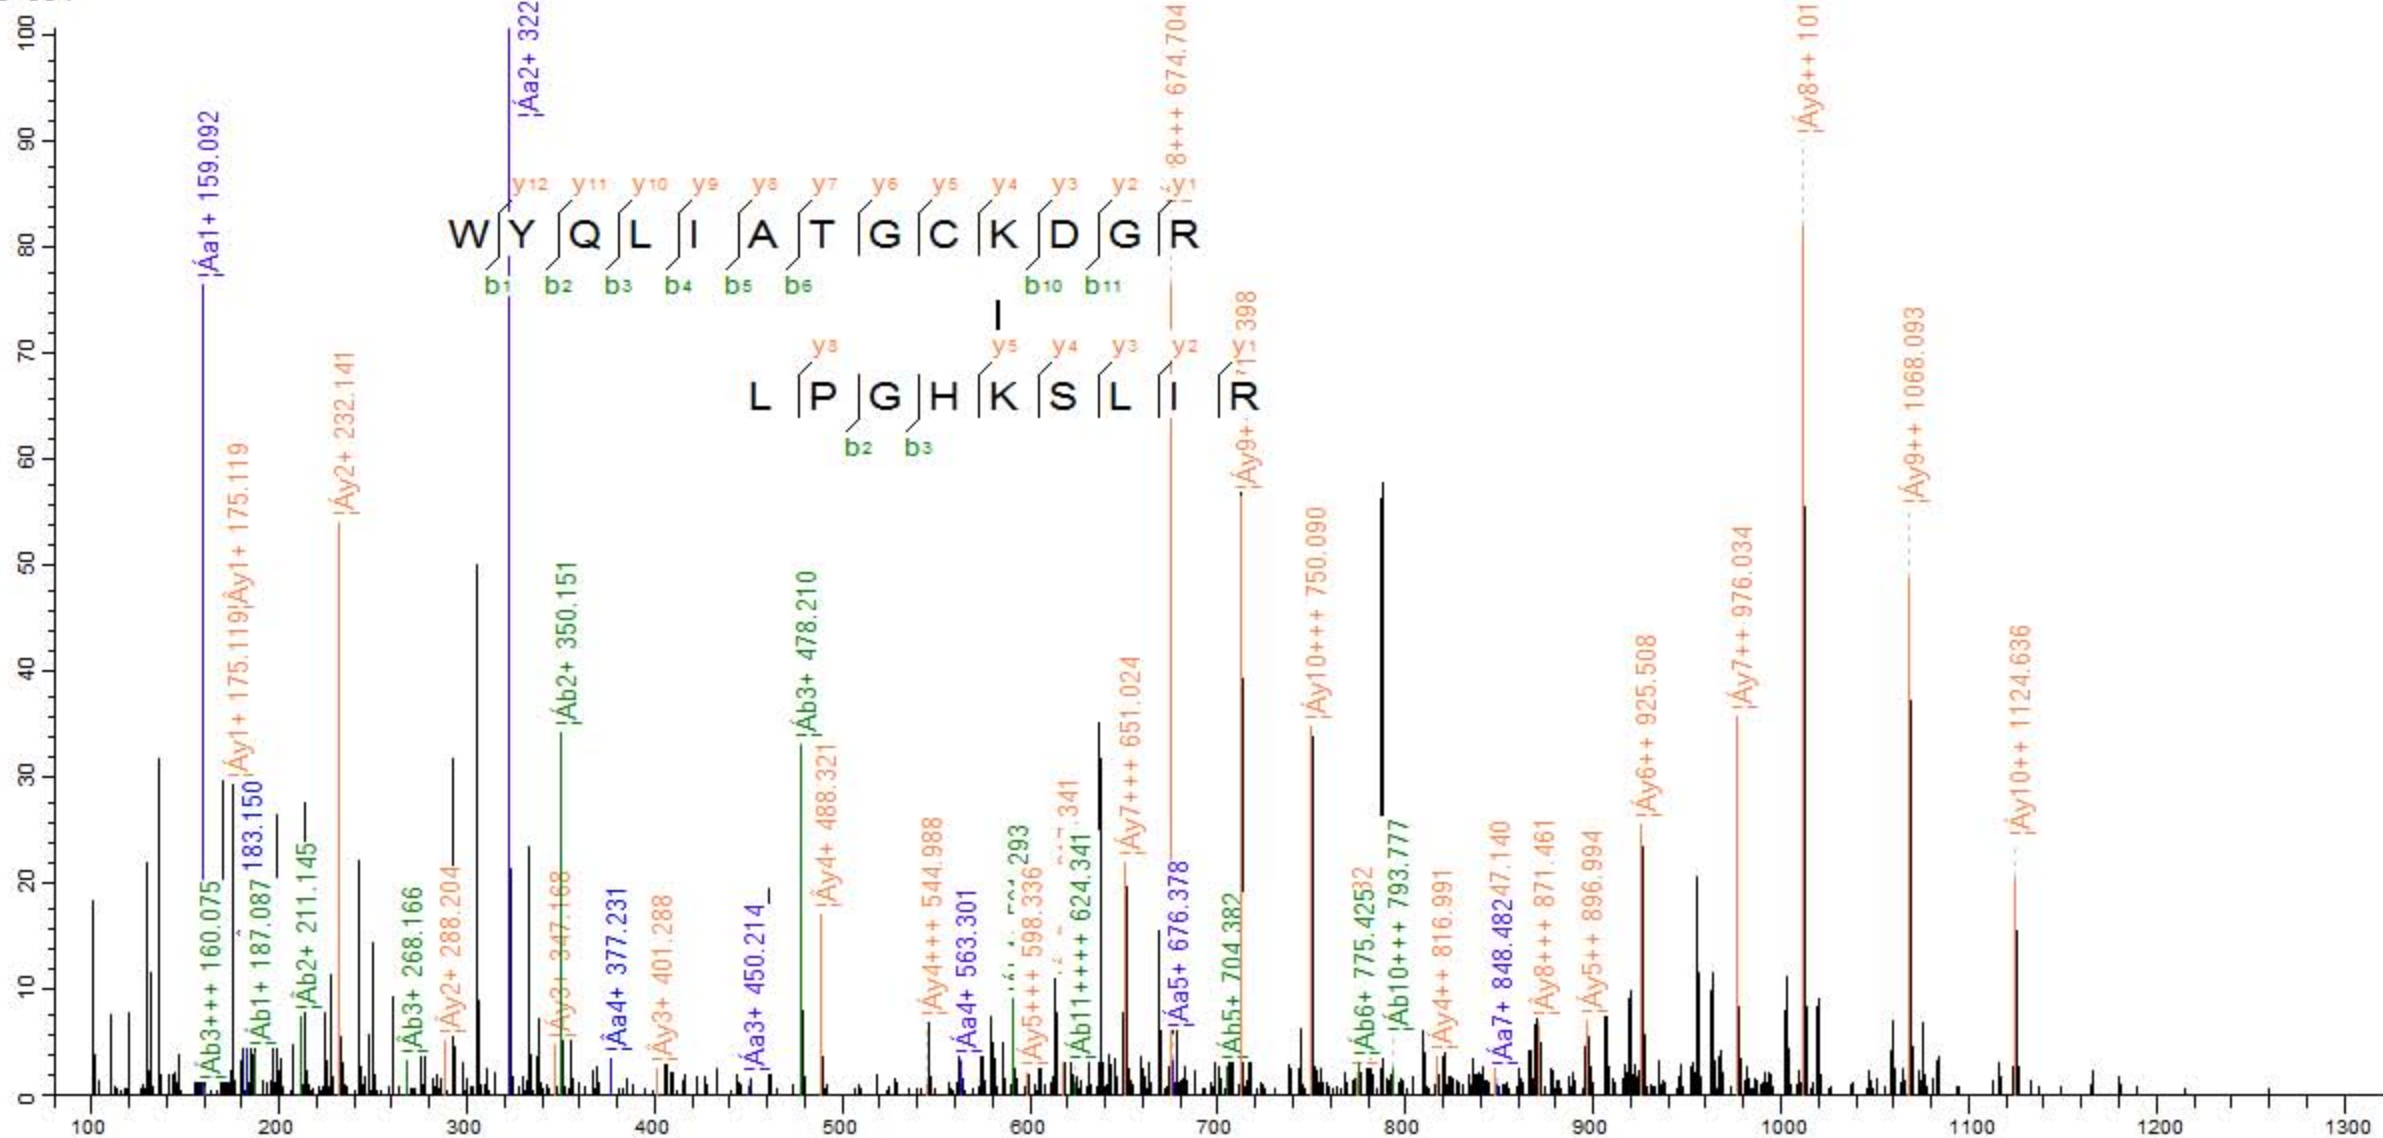

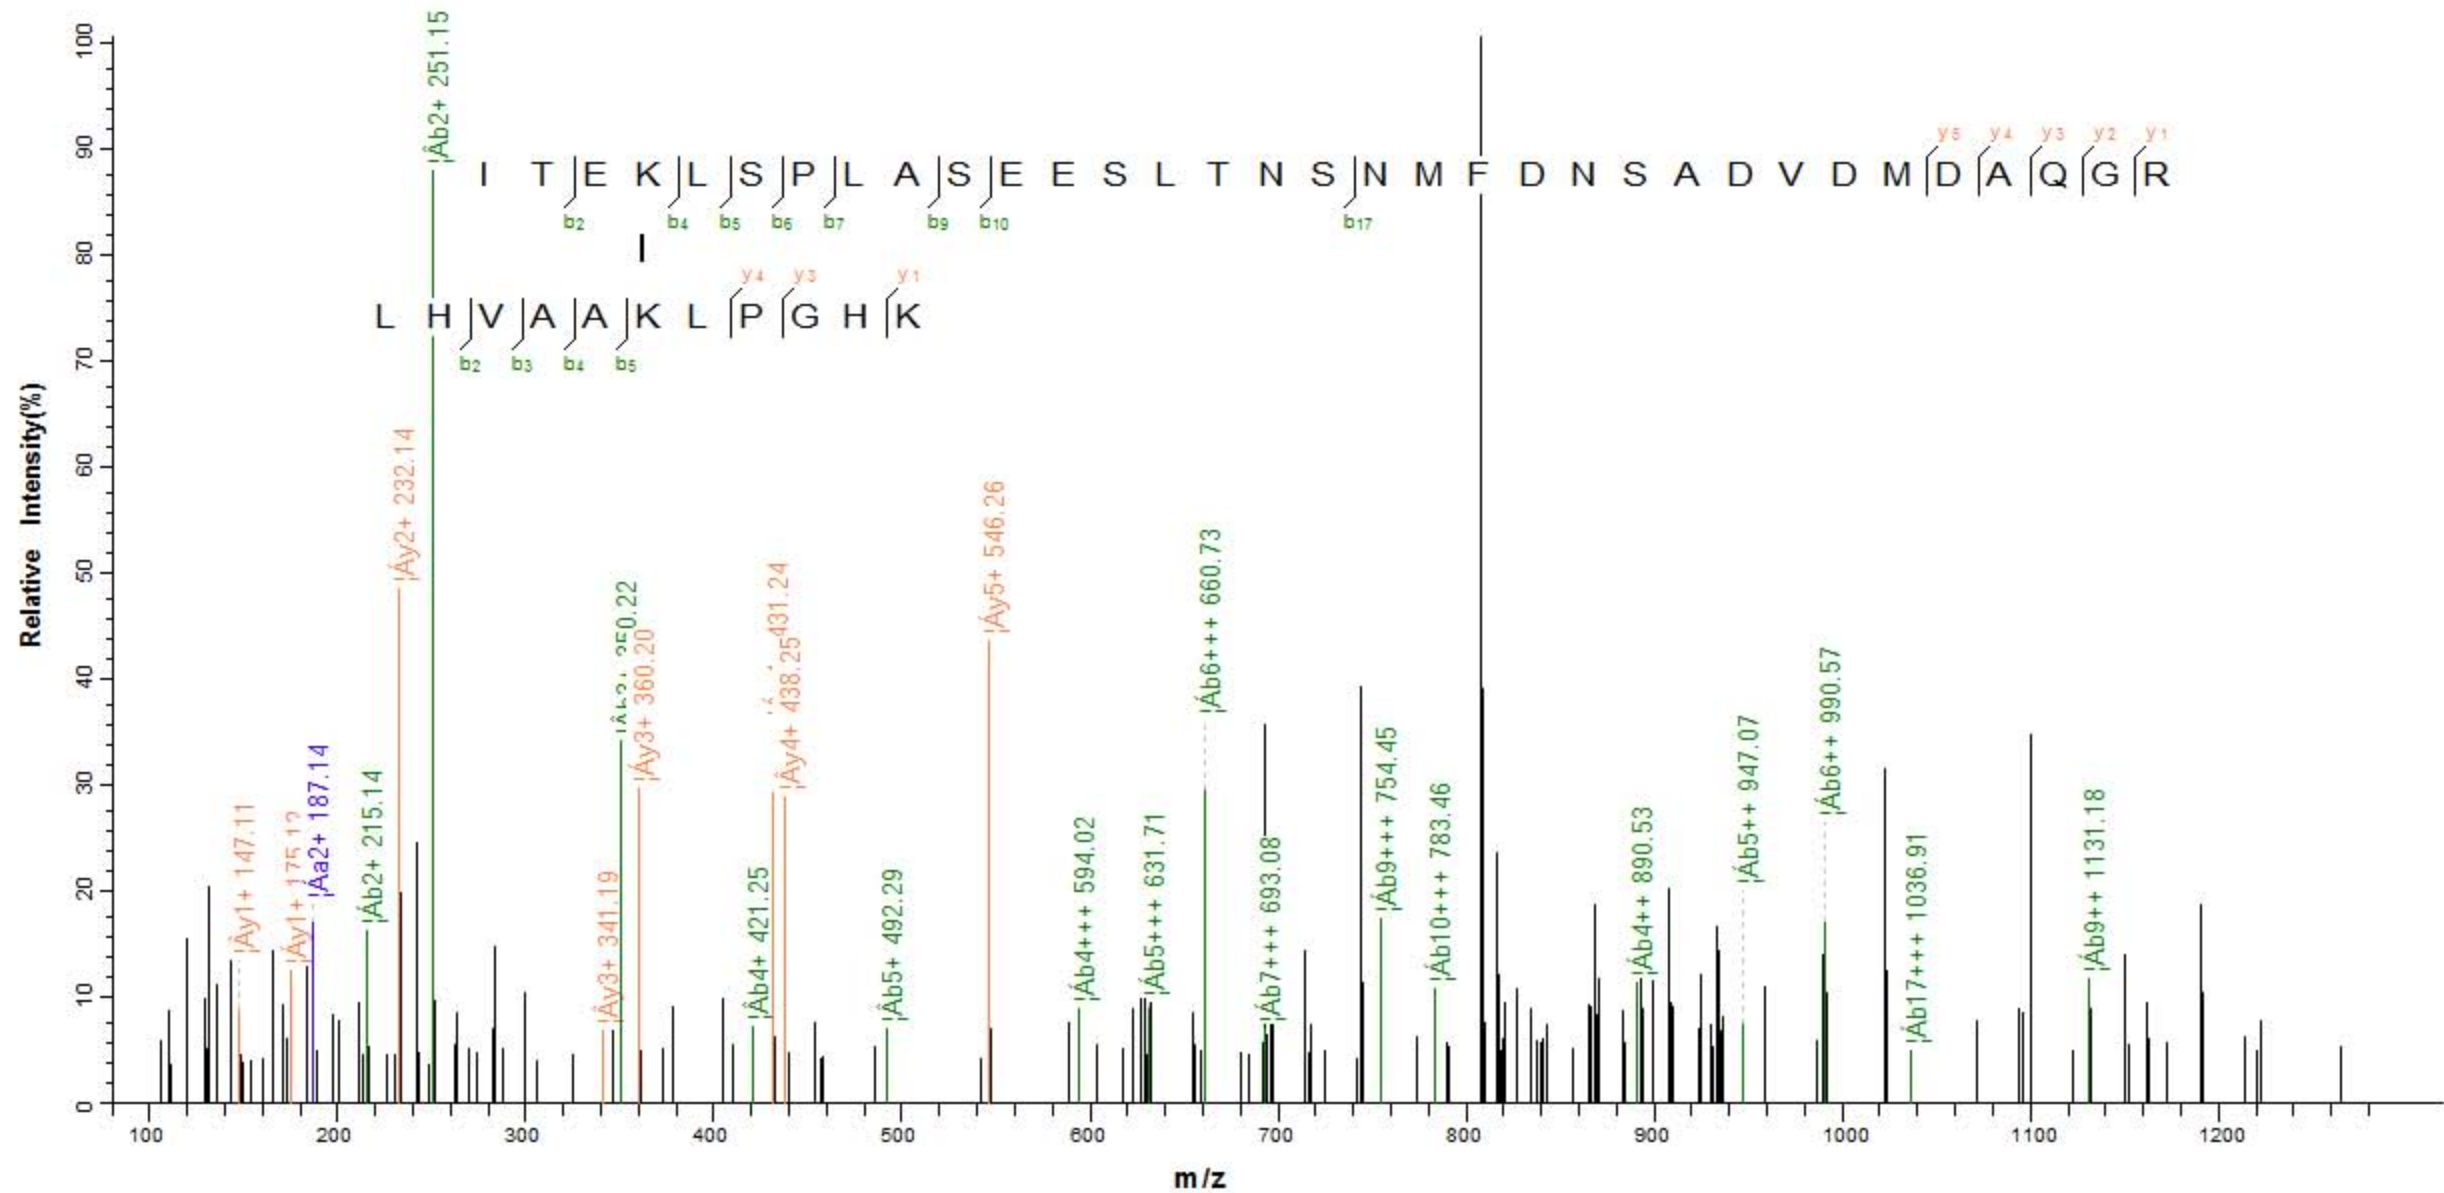

8.2e+003

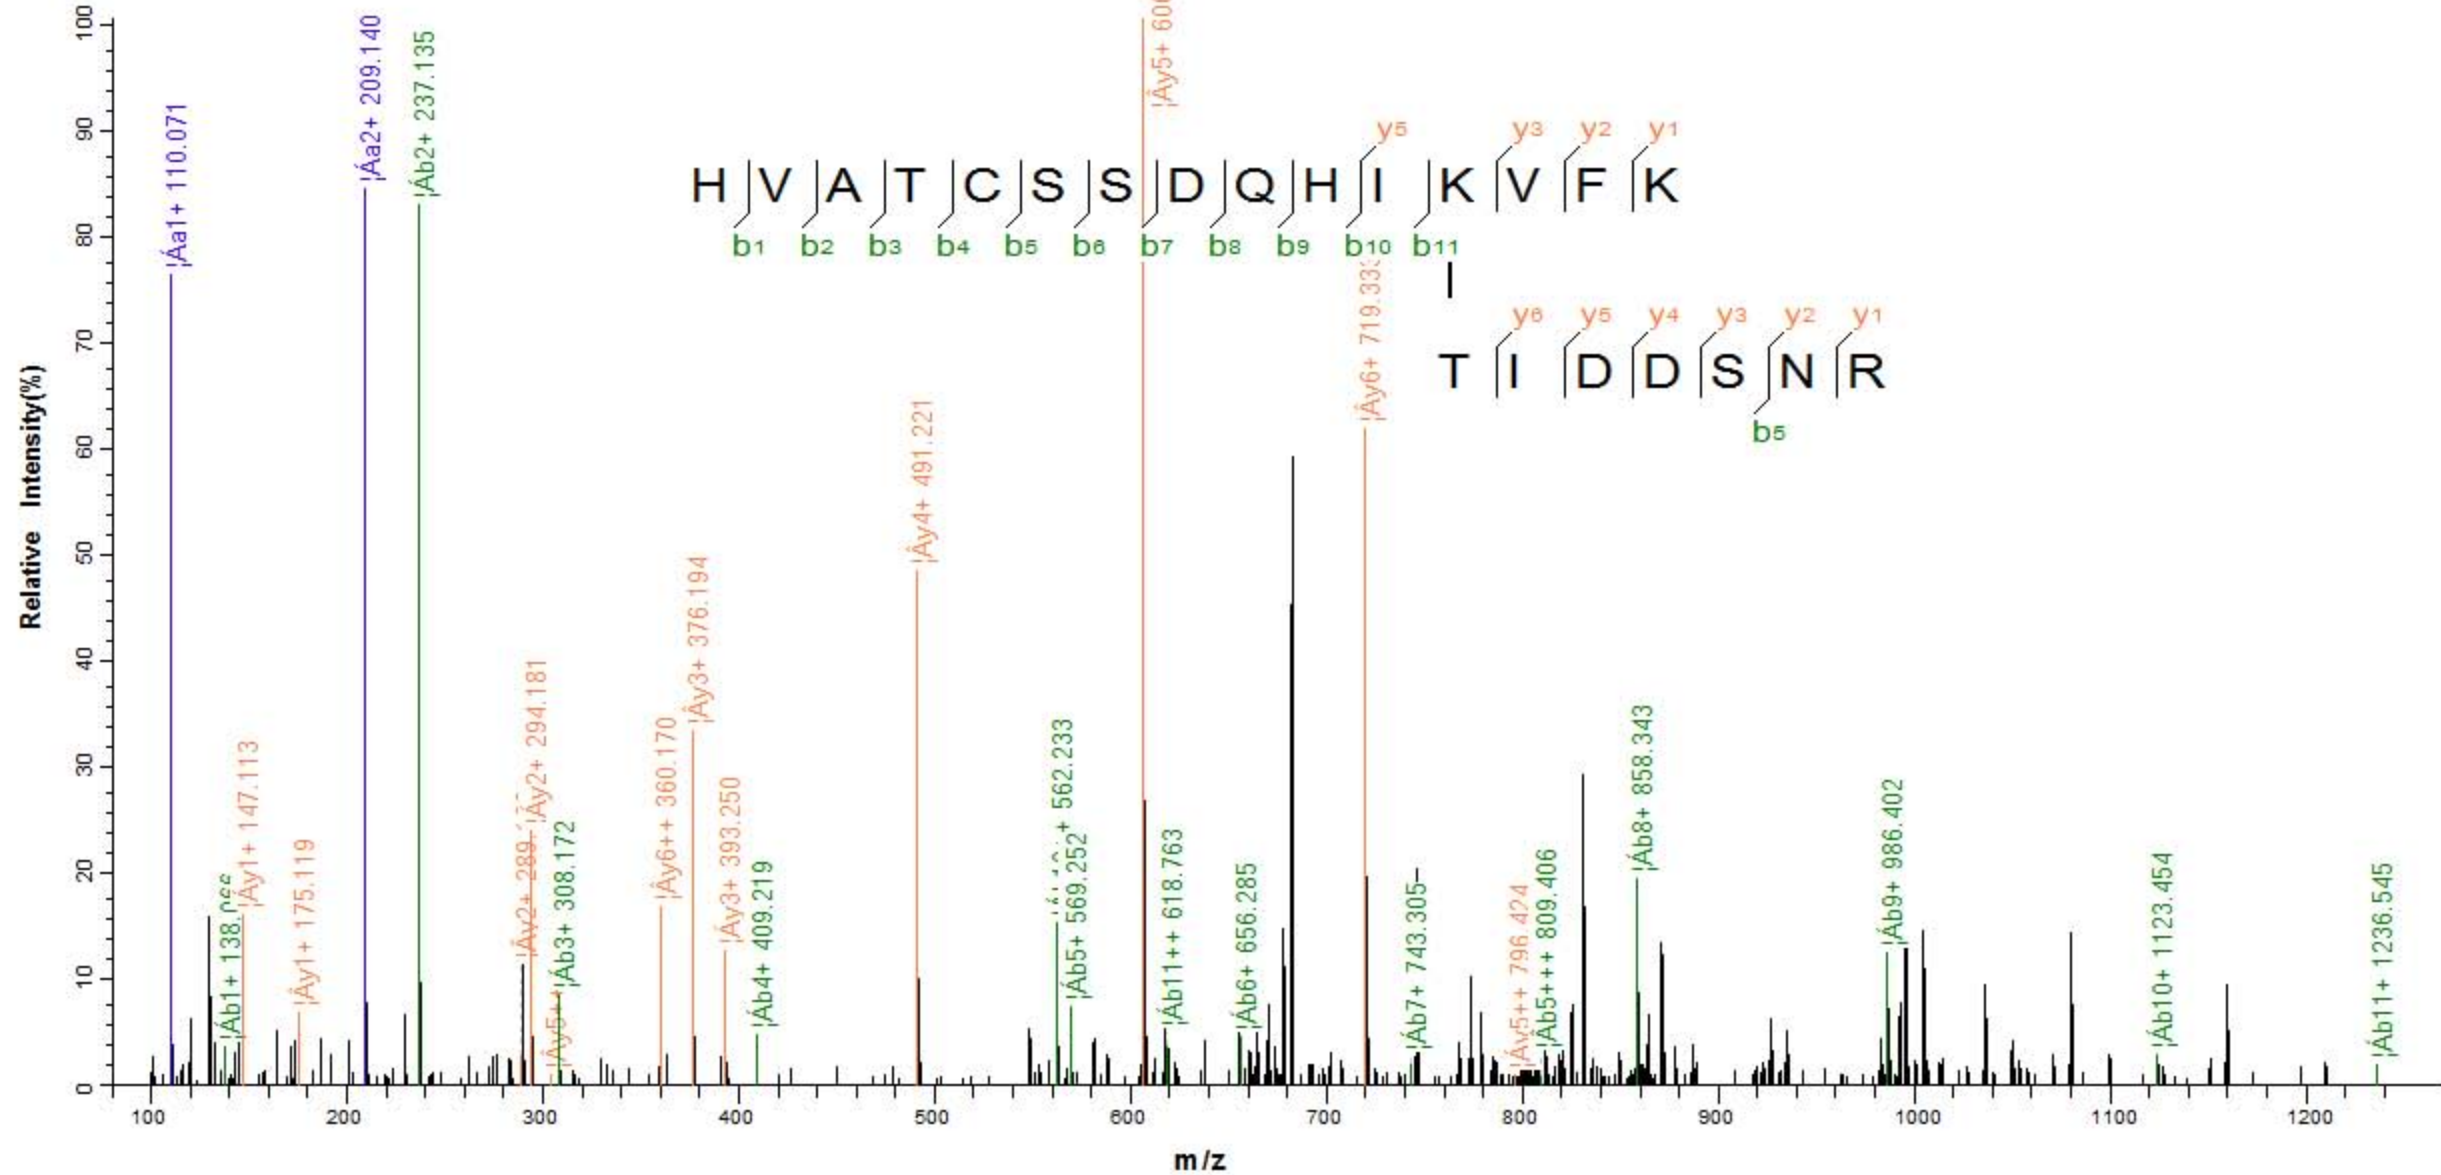

7.0e+004

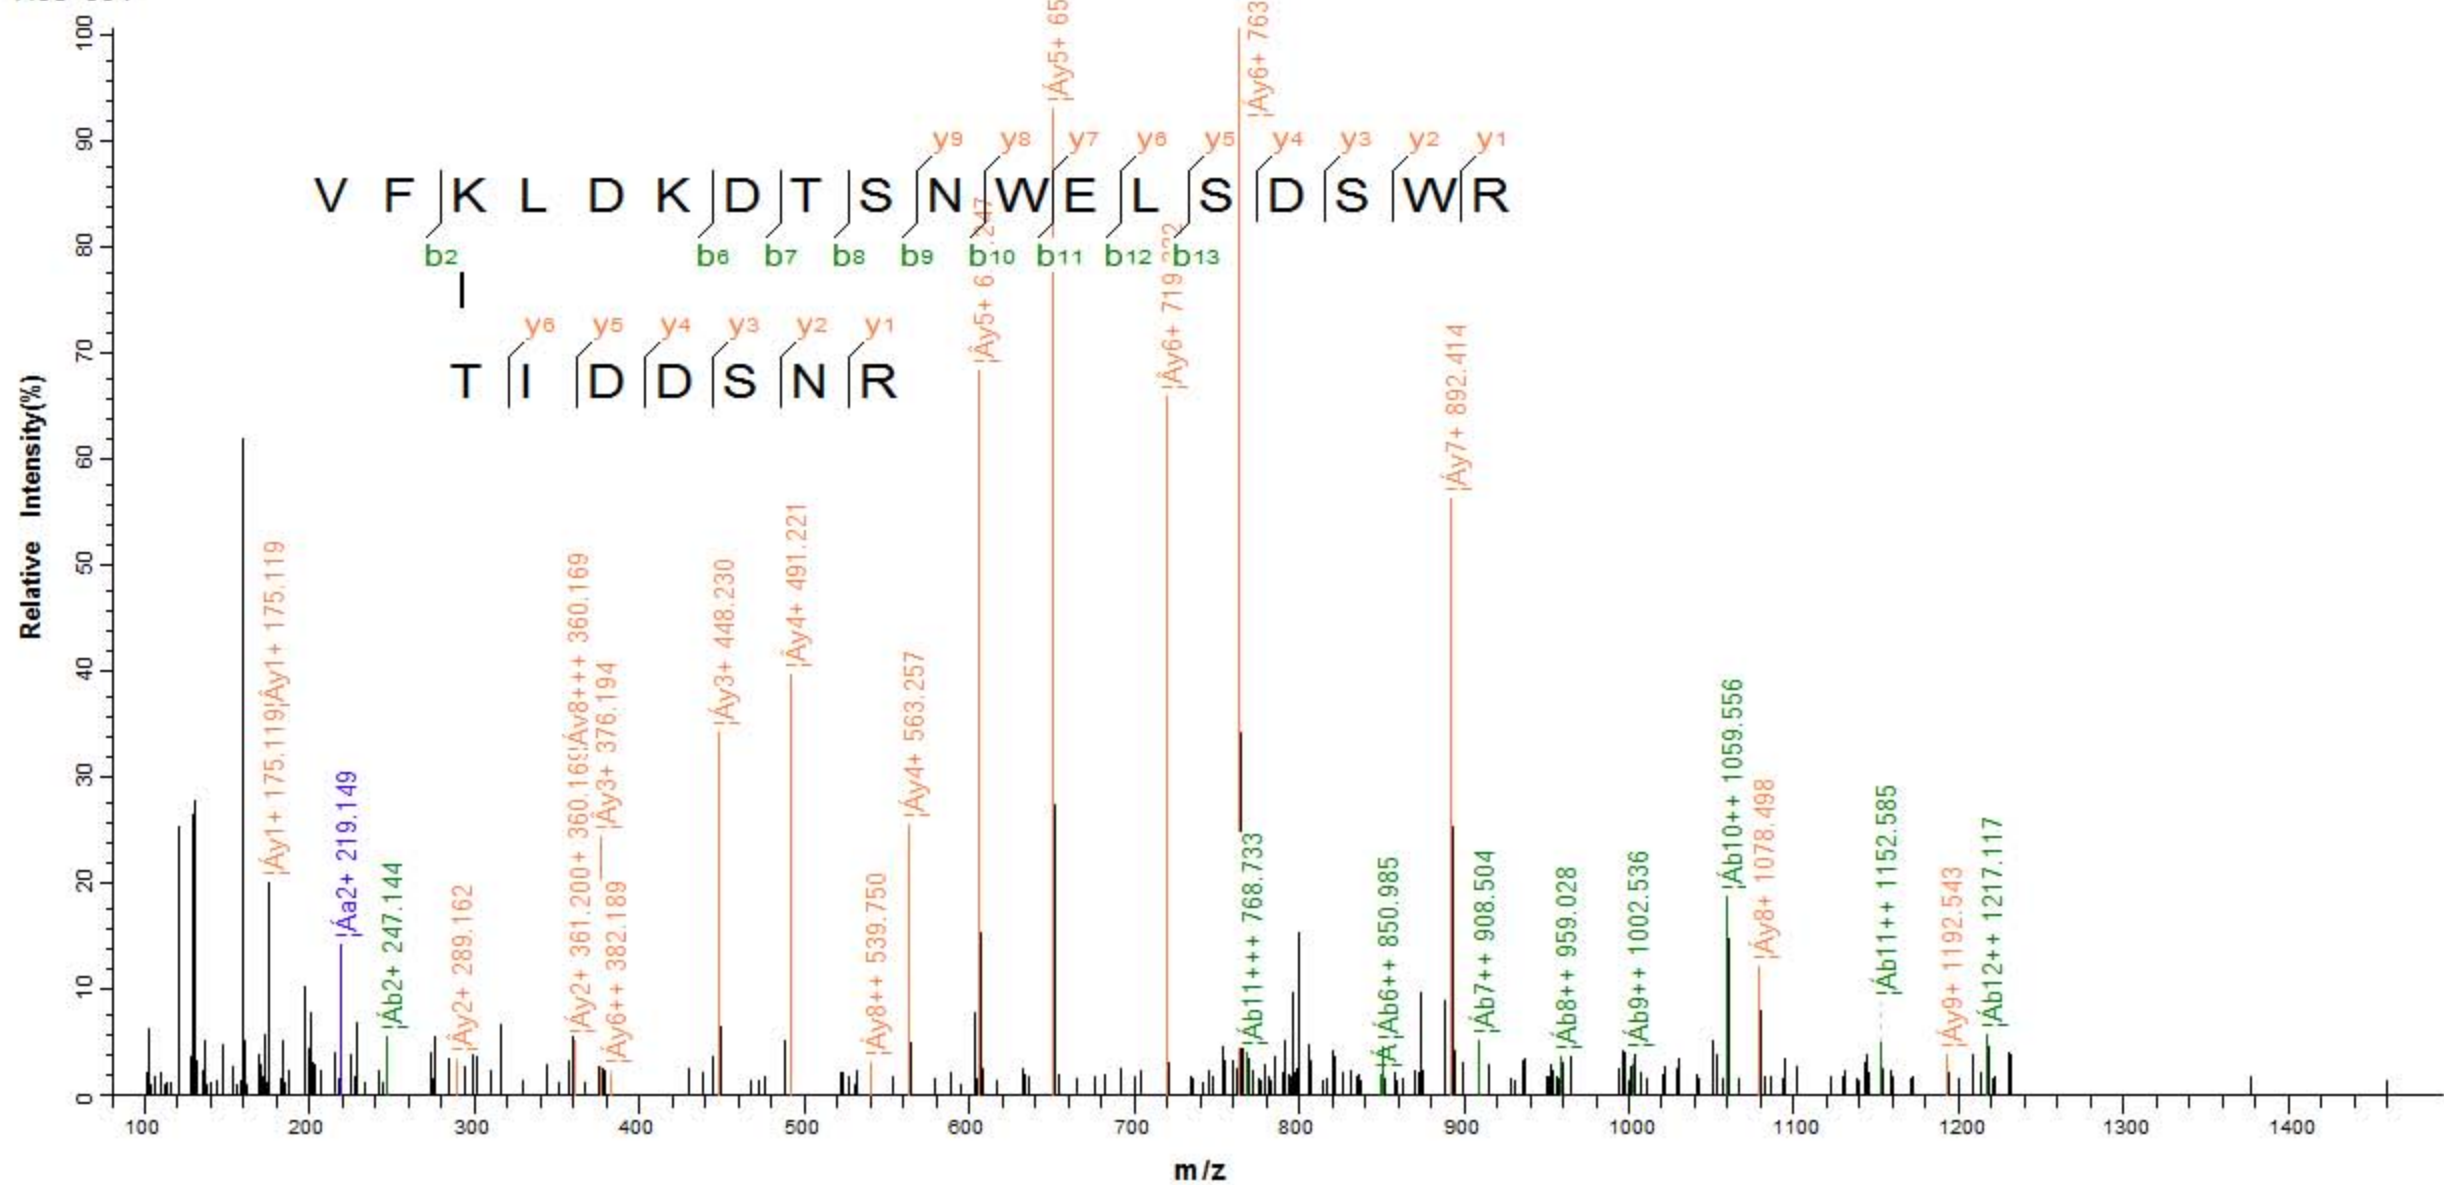



6.9e+004

Relative Intensity(%)

100  
90  
80  
70  
60  
50  
40  
30  
20  
10  
0

100 200 300 400 500 600 700 800 900 1000 1100 1200 1300 1400

m/z

L D K | D | T | S | N | W | E | L | S | D | S | W | R  
 b3 b4 b5 b6 b7 b8 b9  
 A G | K | Y | E | L | V | K  
 b2  
 y8 y7 y6 y5 y4 y3 y2 y1  
 y4 y3 y2 y1

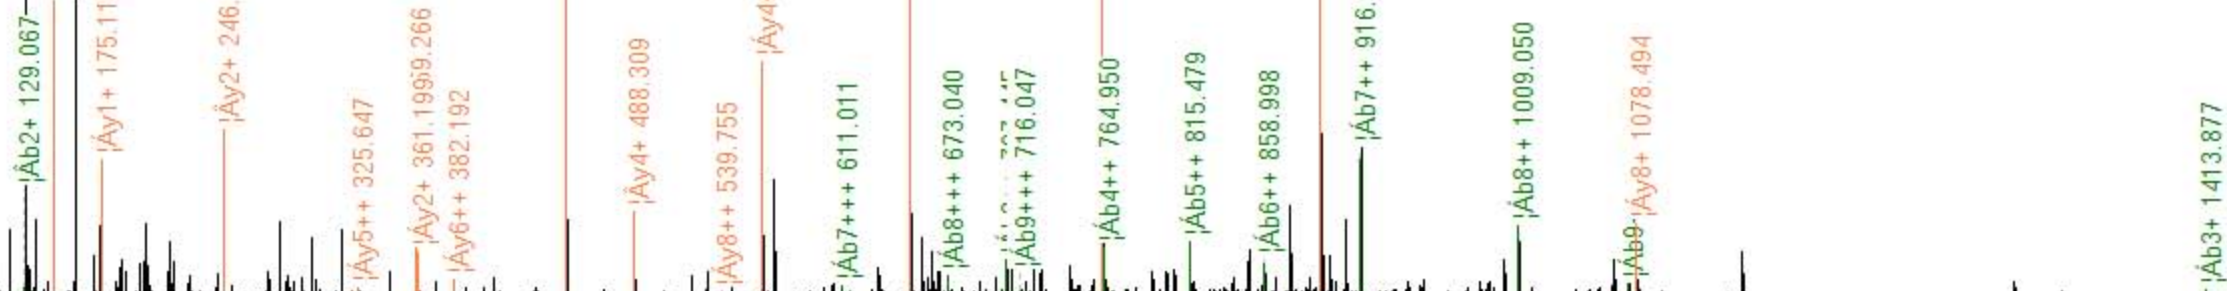

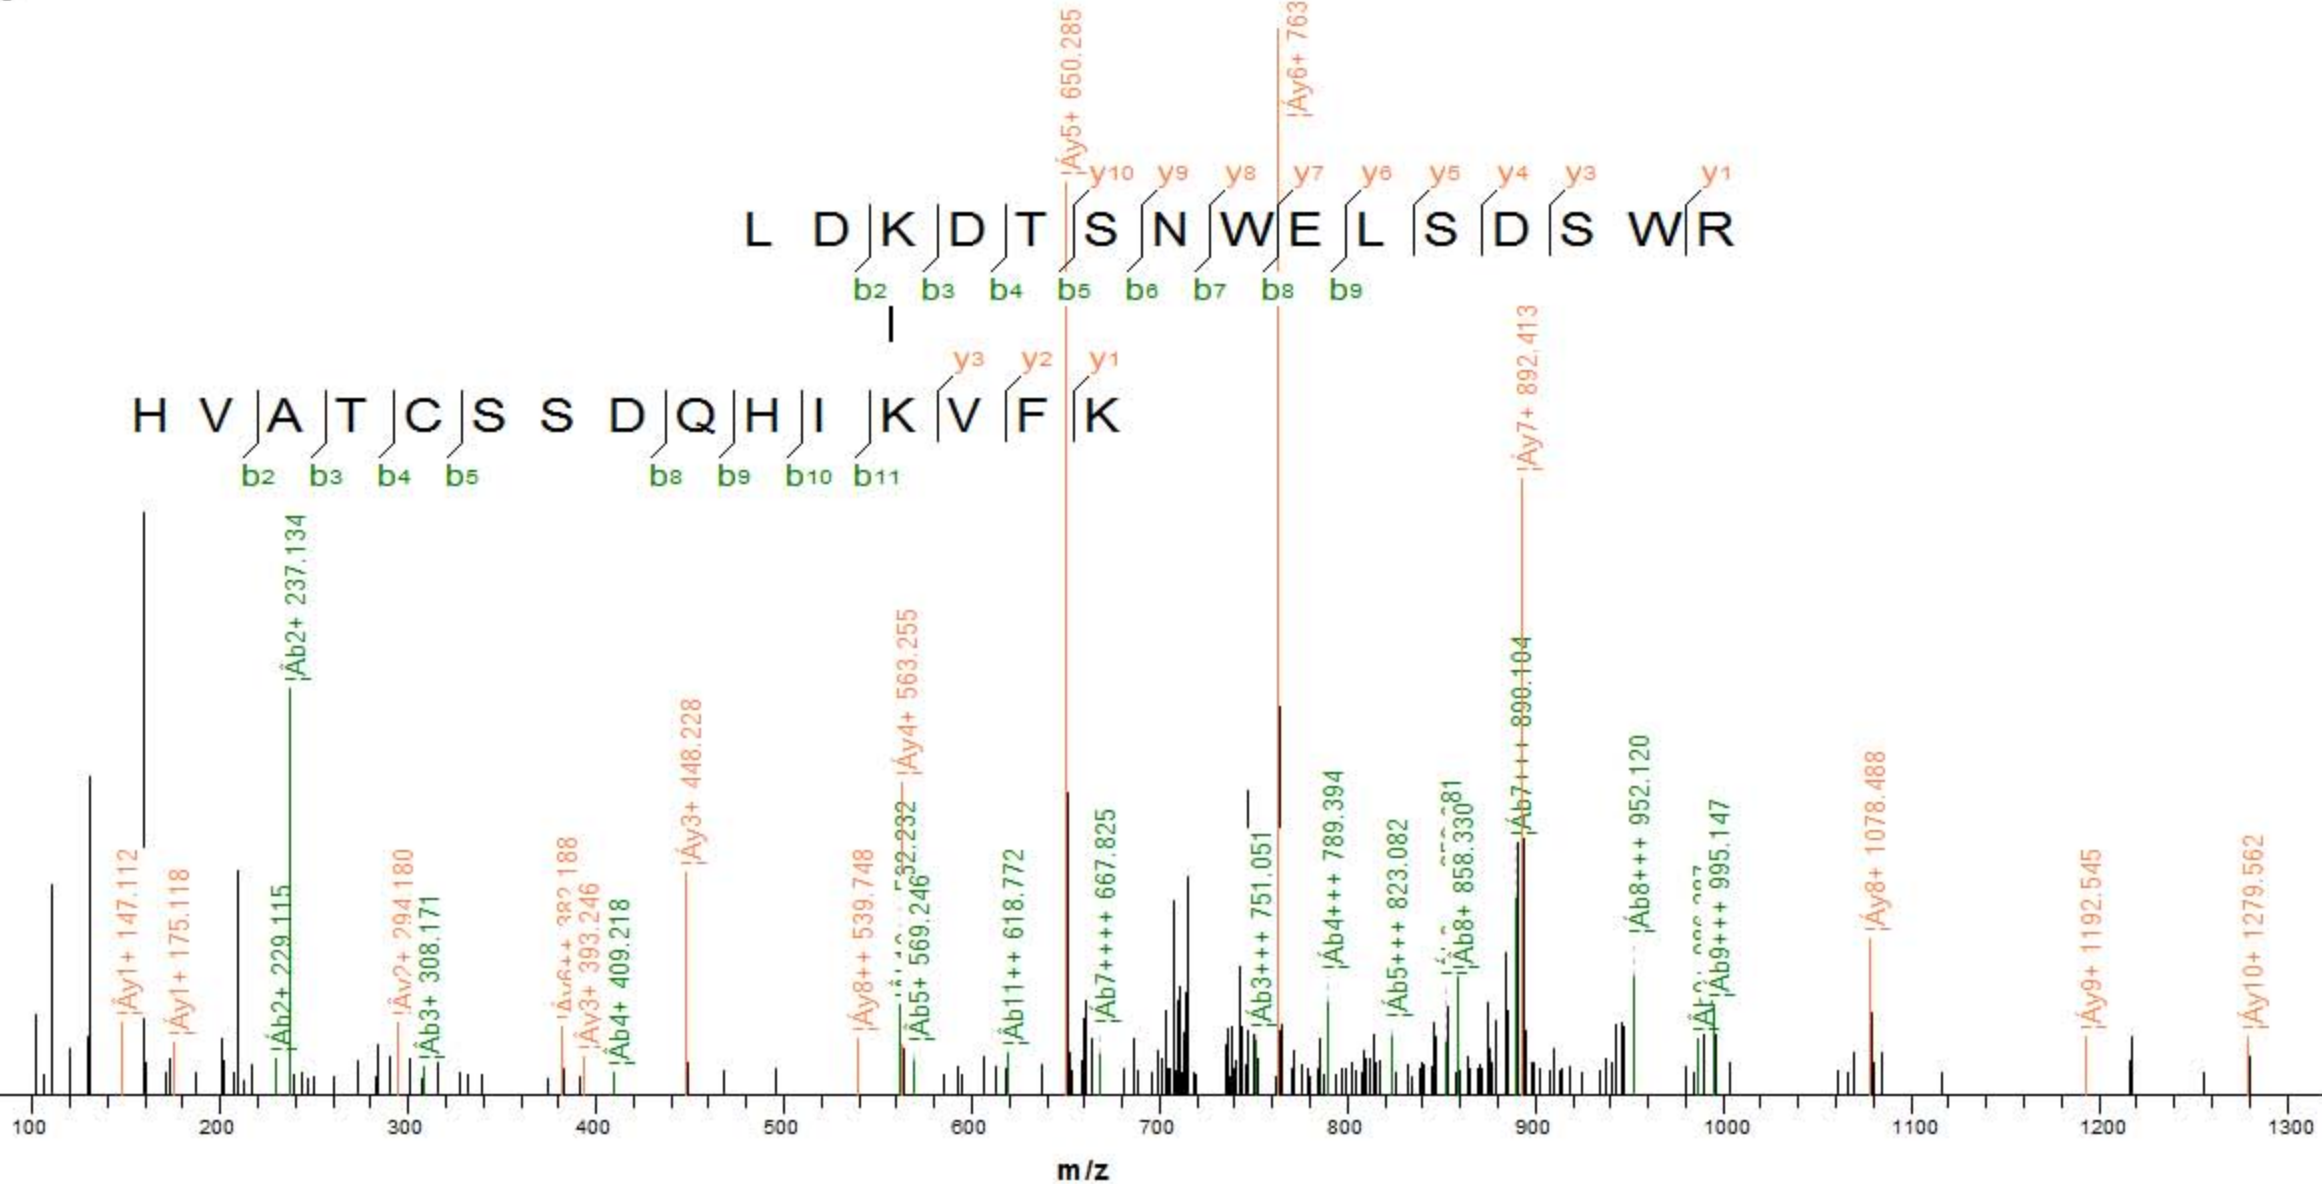

2.9e+004

Relative Intensity(%)

T | V | K | L | W | E | E | D | P | D | Q | E | E | C | S | G | R

W | N | K | L | C | T | L | N | D | S | K

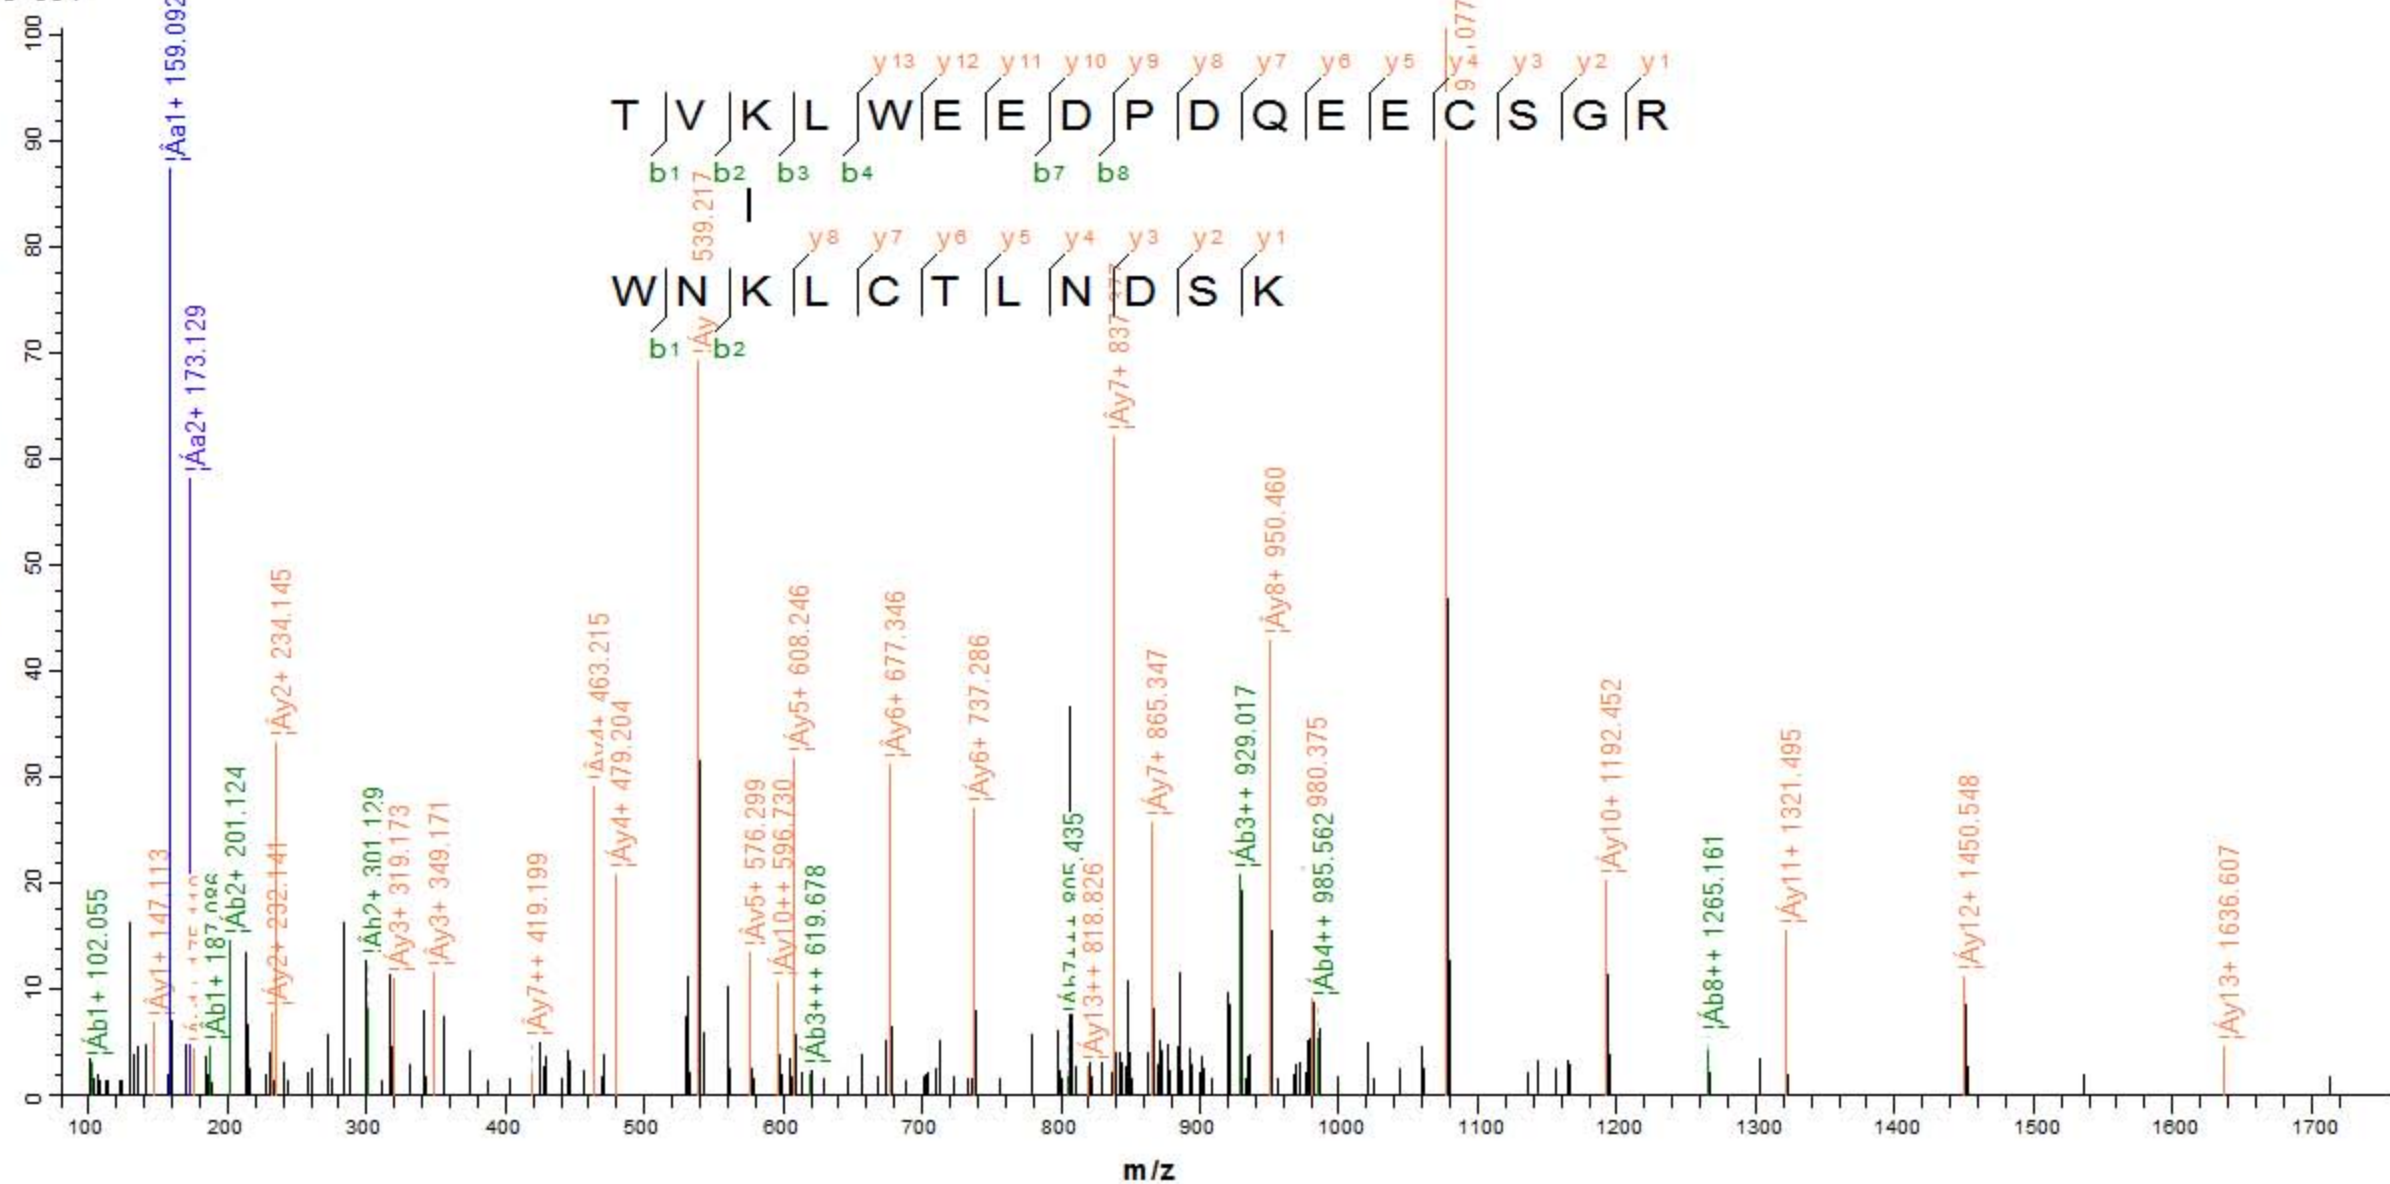

m/z
