# Supplementary material
Source: PubMed Central journal article supplement (PMC4223482)
Supplement: supp_M114.041673_mcp.M114.041673-5.pdf [file supp_M114.041673_mcp.M114.041673-5.pdf]

|                        |                                                                  |         |          |          |   |           |      |                             |
|------------------------|------------------------------------------------------------------|---------|----------|----------|---|-----------|------|-----------------------------|
| Sec13(31)-Nup145c(141) | LATCSSDKTIK(8)-LIMKER(4):0                                       | 5.0E-07 | 2165.144 | 2169.173 | 4 | 542.29316 | -0.1 | Oxidation_M&Carbamidomethyl |
| Sec13(34)-Nup145c(168) | TIKIFEVEGETHK(3)-DIVGKSGVSIK(5):0                                | 6.7E-09 | 2769.516 | 2774.553 | 5 | 554.91055 | -0.2 |                             |
| Sec13(44)-Nup145c(168) | IFEVEGETHKLIDTLTGHEGPVWR(10)-DIVGKSGVSIK(5):1                    | 9.3E-10 | 4014.184 | 4019.221 | 5 | 803.84413 | -0.8 |                             |
| Sec13(44)-Sec13(2)     | IFEVEGETHKLIDTLTGHEGPVWR(10)-VVIANAHNELIHDAVLDDYYGK(1):1         | 8.4E-16 | 5265.752 | 5271.795 | 6 | 878.63253 | -4.4 |                             |
| Sec13(65)-Nup145c(509) | VDWAHPKFGTILASCSYDYGK(7)-AAEDTIKR(7):0                           | 8.9E-09 | 3291.623 | 3296.660 | 5 | 659.33195 | -0.2 | Carbamidomethyl             |
| Sec13(83)-Nup145c(649) | IFYDQYKHCR(7)-VLIWKEENGR(5):1                                    | 2.7E-08 | 2821.475 | 2825.504 | 4 | 706.37604 | 0.6  | Carbamidomethyl             |
| Seh1(1)-Nup85(163)     | MQPFDSGHDDL VHDVVYDFYGR(1)-VKDQDGR(2):0                          | 1.8E-05 | 3581.616 | 3586.652 | 5 | 717.33042 | 1.2  | Oxidation_M                 |
| Seh1(1)-Nup85(2)       | MQPFDSGHDDL VHDVVYDFYGR(1)-TIDDSNR(1):1                          | 1.8E-14 | 3596.653 | 3600.682 | 4 | 900.17055 | -0.3 | Oxidation_M                 |
| Seh1(1)-Nup85(30)      | LLMDVDQDFLDDGTAQLSNNKTDEEEQLYKR(22)-MQPFDSGHDDL VHDVVYDFYGR(1):0 | 7.3E-20 | 6570.970 | 6577.013 | 6 | 1096.1689 | 0.7  | Oxidation_M                 |
| Seh1(1)-Nup85(39)      | MQPFDSGHDDL VHDVVYDFYGR(1)-TDEEEQLYKR(9):0                       | 4.3E-13 | 4058.827 | 4062.856 | 4 | 1015.714  | -1.2 |                             |
| Seh1(1)-Nup85(89)      | MQPFDSGHDDL VHDVVYDFYGR(1)-YKLYPVR(2):1                          | 1.9E-05 | 3714.819 | 3719.856 | 5 | 743.97115 | -0.7 | Oxidation_M                 |
| Seh1(1)-Seh1(40)       | MQPFDSGHDDL VHDVVYDFYGR(1)-LDKDTSNWELSDSWR(3):0                  | 1.6E-27 | 4616.050 | 4620.079 | 4 | 1155.0198 | -0.3 | Oxidation_M                 |
| Seh1(100)-Nup85(2)     | RWNKLCCTLNDSK(4)-TIDDSNR(1):1                                    | 7.2E-07 | 2503.287 | 2507.316 | 4 | 626.82893 | 0.6  | Carbamidomethyl             |
| Seh1(108)-Seh1(79)     | LCTLNDSKGSLSYVK(8)-IIASASYDKTVK(9):1                             | 1.4E-07 | 3128.706 | 3132.735 | 4 | 783.18367 | -1.0 | Carbamidomethyl             |
| Seh1(182)-Seh1(198)    | FSPEKLAVSALEQAIYQR(5)-GKDGK(2):0                                 | 1.6E-03 | 2803.512 | 2807.541 | 4 | 701.88526 | 1.1  |                             |
| Seh1(2)-Nup85(1)       | QPFDSGHDDL VHDVVYDFYGR(1)-MTIDDSNR(1):1                          | 1.2E-12 | 3596.653 | 3600.682 | 4 | 900.17055 | 0.6  | Oxidation_M                 |
| Seh1(207)-Nup85(2)     | LHVAAKLPGHK(6)-TIDDSNR(1):1                                      | 2.5E-10 | 2139.218 | 2143.247 | 4 | 535.81171 | -0.5 |                             |
| Seh1(207)-Seh1(198)    | LHVAAKLPGHK(6)-GKDGK(2):0                                        | 6.4E-05 | 1811.042 | 1815.071 | 4 | 453.7677  | 0.7  |                             |
| Seh1(212)-Nup85(2)     | LPGHKSLIR(5)-TIDDSNR(1):0                                        | 2.7E-08 | 1977.064 | 1981.093 | 4 | 495.27336 | 0.4  |                             |
| Seh1(236)-Nup85(2)     | WYQLIATGCKDGR(10)-TIDDSNR(1):1                                   | 2.6E-07 | 2536.276 | 2540.305 | 4 | 635.0762  | 0.1  | Carbamidomethyl             |
| Seh1(236)-Nup85(64)    | WYQLIATGCKDGR(10)-NGDKMPLK(4):0                                  | 1.8E-11 | 2606.298 | 2610.328 | 4 | 652.5819  | 0.1  | Carbamidomethyl             |
| Seh1(236)-Seh1(212)    | WYQLIATGCKDGR(10)-LPGHKSLIR(5):0                                 | 6.1E-08 | 2724.453 | 2728.482 | 4 | 682.12061 | -0.9 | Carbamidomethyl             |
| Seh1(248)-Seh1(207)    | ITEKLSPLASEESLTNSNMFDNSADVMDAQGR(4)-LHVAAKLPGHK(6):0             | 3.0E-06 | 4892.396 | 4898.440 | 6 | 816.40661 | -5.6 |                             |
| Seh1(34)-Nup85(2)      | HVATCSSDQHIKVF(12)-TIDDSNR(1):1                                  | 3.7E-17 | 2725.387 | 2729.416 | 4 | 682.35404 | -0.2 | Carbamidomethyl             |
| Seh1(40)-Nup85(2)      | VFKLDKDTSNWELSDSWR(6)-TIDDSNR(1):0                               | 8.3E-11 | 3182.516 | 3186.545 | 4 | 796.63618 | -0.5 |                             |
| Seh1(40)-Nup85(564)    | LDKDTSNWELSDSWR(3)-AGKYELVK(3):1                                 | 1.1E-07 | 2907.503 | 2911.532 | 4 | 727.88306 | -0.5 |                             |
| Seh1(40)-Seh1(34)      | LDKDTSNWELSDSWR(3)-HVATCSSDQHIKVF(12):0                          | 1.0E-11 | 3744.784 | 3749.821 | 5 | 749.96411 | 1.0  |                             |
| Seh1(82)-Seh1(100)     | TVKLWEEDPDQECSGR(3)-WNKLCCTLNDSK(3):0                            | 2.1E-17 | 3592.645 | 3596.674 | 4 | 899.16852 | 0.2  | Carbamidomethyl             |
