# Supplementary material
Source: PubMed Central journal article supplement (PMC4223482)
Supplement: supp_M114.041673_mcp.M114.041673-6.pdf [file supp_M114.041673_mcp.M114.041673-6.pdf]

| Cross-link                     | Peptide (:0 represents DSS-H12, while :1 represents DSS-D12)       | Probability score | Calc_M   | ved mass(monoiso) | m/z      | z | ppm |
|--------------------------------|--------------------------------------------------------------------|-------------------|----------|-------------------|----------|---|-----|
| Nup120(17)-Nup120(421)         | IDANLLQYYEKPEPNTVDLYVSNNSNNGLK(11)-YGTQIFER(7):0                   | 1.8E-05           | 4647.252 | 4651.267          | 1162.813 | 4 | -3  |
| Nup120(206)-Nup120(219)        | KVDGVVHYEPLLFNDNSYLKSLTR(19)-SDYDSVISCK(2):1                       | 6.1E-07           | 3861.888 | 3866.925          | 773.385  | 5 | 0   |
| Nup120(38)-Nup120(429)         | IDANLLQYYEKPEPNTVDLYVSNNSNNGLKEGDK(32)-AQQILSENK(7):0              | 3.2E-03           | 5093.485 | 5098.517          | 1019.702 | 5 | -1  |
| Nup120(400)-Nup120(440/441)    | SLVDLQSEHDLDIVTKTGDVER(16)-IIMAHNEDEEYLANLETILR(9/10):1            | 9.4E-16           | 4836.413 | 4841.435          | 968.284  | 5 | -3  |
| Nup120(400)-Nup120(523)        | SLVDLQSEHDLDIVTKTGDVER(16)-TLNGFASTLSNDVLR(12):1                   | 7.2E-04           | 4057.060 | 4062.089          | 812.416  | 5 | -2  |
| Nup120(735)-Nup120(403/405)    | SYIIENTSHKNIR(10)-TGDVER(3/5):0                                    | 2.2E-06           | 2231.129 | 2236.166          | 447.233  | 5 | 0   |
| Nup120(865)-Nup120(894/898)    | EIQIEELQDFKEK(11)-LGHECLSDTVR(4/8):0                               | 1.2E-10           | 2915.433 | 2919.460          | 729.864  | 4 | -1  |
| Nup133(103)-Nup133(130/131)    | TLQTDYSSGFSNDDELNGYIDMQIGYGLVNDHKK(33)-SDDNDEIAVAPR(5/6):0         | 3.2E-10           | 5119.326 | 5124.358          | 1024.871 | 5 | -1  |
| Nup133(1072)-Nup133(1032)      | VFDEELPKNNDPPLPSVDLLCDK(8)-LLSVDGNLLNFEVKK(12):0                   | 4.6E-04           | 4373.250 | 4378.282          | 875.656  | 5 | -1  |
| Nup133(1142)-Nup133(1068/1069) | LHSTIGSVAKEK(10)-VFDEELPK(4/5):0                                   | 5.9E-07           | 2226.190 | 2230.219          | 557.555  | 4 | 0   |
| Nup133(1144)-Nup133(1068)      | EKNYTINYETNTVEY(2)-RVFDEELPK(5):0                                  | 2.8E-05           | 2993.429 | 2997.453          | 749.362  | 4 | -2  |
| Nup133(168)-Nup133(131)        | CILTFPATMDESPLALNPNDQDETGGIIHKGSK(31)-SDDNDEIAVAPR(6):0            | 1.4E-03           | 4940.406 | 4945.432          | 989.084  | 5 | -2  |
| Nup133(171)-Nup133(127)        | GSKAIYYEDINSINNLNFK(3)-SDDNDEIAVAPR(2):0                           | 1.3E-22           | 3484.675 | 3488.700          | 872.174  | 4 | -1  |
| Nup133(171)-Nup133(195/197)    | GSKAIYYEDINSINNLNFK(3)-FSHELELPINSSGGEK(4/6):0                     | 6.9E-14           | 3926.933 | 3931.965          | 786.392  | 5 | -1  |
| Nup133(187)-Nup133(127)        | AIYYEDINSINNLNFKLSEK(16)-SDDNDEIAVAPR(2):0                         | 5.3E-08           | 3669.780 | 3673.791          | 918.443  | 4 | -5  |
| Nup133(253)-Nup84(340)         | LLNKPFLGIWSK(7)-HPSESEHPIR(6):0                                    | 5.4E-07           | 2712.486 | 2717.523          | 543.505  | 5 | 0   |
| Nup133(394)-Nup133(454)        | LNTFMESITDTKFKPK(12)-NDIDIIGSGYDSK(4):0                            | 1.3E-05           | 3292.617 | 3297.667          | 659.536  | 5 | 4   |
| Nup133(480)-Nup133(63)         | QMGVLFQFFVKENEETNSKPEVGFVK(10)-VFTENNR(4):0                        | 1.4E-02           | 3743.862 | 3748.898          | 749.780  | 5 | 0   |
| Nup133(484)-Nup133(442)        | ENEETNSKPEVGFVK(3)-KWEDIVSLR(1):0                                  | 4.9E-07           | 2832.429 | 2837.463          | 567.492  | 5 | -1  |
| Nup133(486)-Nup133(442)        | ENEETNSKPEVGFVK(1)-KWEDIVSLR(1):0                                  | 1.8E-04           | 2832.429 | 2837.463          | 567.492  | 5 | -1  |
| Nup133(506)-Nup133(562)        | SHVDQAVYFSKINANPIDFNLPPEISLDQESIEHDLK(11)-KEFFQNFLTQVAK(2):0       | 8.0E-09           | 5821.931 | 5827.969          | 971.327  | 6 | -1  |
| Nup133(912/913)-Nup133(1097)   | KGESLSECELHLNVAK(1)-SLLTPEYISETYGR(10):0                           | 9.7E-11           | 3422.703 | 3427.736          | 685.547  | 5 | -1  |
| Nup133(913)-Nup133(989)        | KGESLSECELHLNVAK(1)-EVFNILVEELK(8):0                               | 4.9E-02           | 3126.627 | 3131.654          | 626.329  | 5 | -3  |
| Nup133(936)-Nup133(392)        | LSSLLVEKDNLDINTLR(8)-LNTFMESITDTK(10):0                            | 6.8E-05           | 3322.733 | 3326.765          | 831.692  | 4 | 1   |
| Nup133(936)-Nup133(952)        | LSSLLVEKDNLDINTLR(8)-KIQYNLDTIDAOK(7):1                            | 4.6E-07           | 3473.862 | 3478.895          | 695.778  | 5 | -1  |
| Nup133(936)-Nup84(713)         | LSSLLVEKDNLDINTLR(8)-LKEYLDELVAR(3):0                              | 2.5E-05           | 3142.760 | 3147.796          | 629.559  | 5 | 0   |
| Nup133(946)-Nup133(1097)       | DNLDTINTLRKIQYNLDTIDAOK(10)-SLLTPEYISETYGR(10):0                   | 1.2E-02           | 4214.138 | 4219.191          | 843.842  | 5 | 4   |
| Nup133(946)-Nup133(935)        | KIQYNLDTIDAOK(1)-LSSLLVEK(7):0                                     | 4.9E-06           | 2419.321 | 2423.348          | 605.836  | 4 | -1  |
| Nup145c(141)-Seh1(284)         | LIMKERR(4)-SDSNTEEK(7):0                                           | 7.0E-08           | 1834.921 | 1838.946          | 459.736  | 4 | -2  |
| Nup145c(183)-Nup145c(226)      | KFLFDDVYLDKEIEK(1)-DALDYMEK(7):0                                   | 4.8E-07           | 2866.399 | 2870.425          | 717.606  | 4 | -1  |
| Nup145c(183)-Nup145c(231)      | KFLFDDVYLDKEIEK(1)-TSSDYNLWK(4):0                                  | 6.2E-09           | 2995.485 | 2999.512          | 749.877  | 4 | -1  |
| Nup145c(193)-Nup145c(220/223)  | FLFDDVYLDKEIEK(10)-DALDYMEK(1/4):1                                 | 1.2E-08           | 2738.304 | 2742.327          | 685.580  | 4 | -2  |
| Nup145c(219)-Nup145c(187)      | KSNPYPQISESSLLFKDALDYMEK(16)-KFLFDDVYLDKEIEK(5):1                  | 5.6E-06           | 4685.350 | 4692.396          | 670.342  | 7 | -1  |
| Nup145c(219)-Nup145c(231)      | KSNPYPQISESSLLFKDALDYMEK(16)-TSSDYNLWK(4):0                        | 1.8E-03           | 3896.882 | 3901.918          | 780.384  | 5 | 0   |
| Nup145c(250)-Nup145c(213)      | LSSILFDPVSYPKTDNDQVK(14)-SNPYPQISESSLLFK(9):0                      | 5.5E-10           | 4119.073 | 4123.102          | 1030.776 | 4 | 0   |
| Nup145c(309)-Nup145c(293)      | ASKLAIESKNGHLSVLISYLSNDPR(3)-NSSNEIEQIFLYLLNDVVR(7):0              | 3.8E-05           | 5128.720 | 5134.763          | 855.794  | 6 | 0   |
| Nup145c(39)-Nup145c(22)        | TLAQSKPSDKEVILK(6)-QEDGGQPLR(2):0                                  | 3.5E-14           | 2765.456 | 2770.489          | 554.097  | 5 | -1  |
| Nup145c(39)-Nup145c(60/61)     | TLAQSKPSDKEVILK(6)-DDSVVEEK(1/2):0                                 | 1.7E-12           | 2571.364 | 2575.391          | 643.847  | 4 | -1  |
| Nup145c(39)-Nup85(164)         | TLAQSKPSDKEVILK(6)-DQDGR(1):1                                      | 5.0E-07           | 2227.181 | 2231.205          | 557.800  | 4 | -2  |
| Nup145c(39)-Nup85(715/717)     | TLAQSKPSDKEVILK(6)-SSNLVETIIEADK(10/12):0                          | 4.0E-07           | 3119.660 | 3124.693          | 624.938  | 5 | -1  |
| Nup145c(39/43)-Nup85(587)      | TLAQSKPSDKEVILK(6)-LDDPVLNAIVSK(2):1                               | 1.9E-13           | 2920.648 | 2924.675          | 731.168  | 4 | -1  |
| Nup145c(39/43)-Seh1(138/141)   | TLAQSKPSDKEVILK(6/10)-LYDALEPSDLR(3/6):0                           | 6.9E-07           | 2928.581 | 2933.611          | 586.721  | 5 | -2  |
| Nup145c(59)-Nup145c(42)        | TDGTFGTLSGKDDSVVEEK(11)-TLAQSKPSDKEVILK(9):1                       | 1.7E-06           | 3635.878 | 3640.911          | 728.181  | 5 | -1  |
| Nup145c(593)-Nup145c(201)      | LLSSNPVQNNELKTLR(14)-VTIAR(4):0                                    | 3.7E-05           | 2634.482 | 2638.511          | 659.628  | 4 | 0   |
| Nup145c(62/63)-Nup85(2)        | TDGTFGTLSGKDDSVVEEK(12/13)-TIDDSNR(1):0                            | 1.1E-06           | 2799.305 | 2803.328          | 700.831  | 4 | -2  |
| Nup145c(642)-Nup145c(686)      | LVLDNVETQETIDSLISGMKIFYDQYK(20)-LLELPLGQPEK(3):0                   | 1.7E-14           | 4395.281 | 4400.313          | 880.062  | 5 | -1  |
| Nup145c(672)-Nup145c(700)      | ILEKNNSIGDSK(4)-GEFAQDLMK(2):0                                     | 3.3E-10           | 2433.221 | 2437.248          | 609.311  | 4 | -1  |
| Nup145c(681)-Nup145c(700/704)  | NNPSIGDSKAK(9)-GEFAQDLMK(2):0                                      | 7.8E-07           | 2165.042 | 2169.071          | 542.268  | 4 | 0   |
| Nup145c(683)-Nup145c(679)      | AKLLELPLGQPEK(2)-NNPSIGDSK(7):0                                    | 2.9E-03           | 2347.275 | 2351.304          | 587.826  | 4 | 0   |
| Nup145c(91)-Nup145c(44)        | LDVSKDWVEQLILAGSSLR(5)-TLAQSKPSDKEVILK(11):0                       | 5.0E-04           | 3766.088 | 3772.124          | 628.686  | 6 | -2  |
| Nup145c(91)-Nup145c(60)        | LDVSKDWVEQLILAGSSLR(5)-TDGTFGTLSGKDDSVVEEK(12):1                   | 1.3E-04           | 4108.085 | 4113.126          | 822.626  | 5 | 1   |
| Nup145c(91)-Nup145c(70)        | LDVSKDWVEQLILAGSSLR(5)-AYEPDLSADFEIEASPK(3):0                      | 2.0E-14           | 4163.059 | 4167.100          | 1041.778 | 4 | 3   |
| Nup84(143)-Nup145c(335)        | NVPTSKWLNSITSGGLK(6)-DLAELQLQK(1):1                                | 2.2E-06           | 2839.544 | 2843.573          | 710.893  | 4 | 0   |
| Nup84(143)-Nup84(164)          | NVPTSKWLNSITSGGLK(6)-ENTNVLDVK(1):0                                | 8.6E-06           | 2813.492 | 2817.521          | 704.380  | 4 | 0   |
| Nup84(143)-Nup84(173/175)      | NVPTSKWLNSITSGGLK(6)-DKEEDHIFFK(1/3):1                             | 1.1E-04           | 3089.582 | 3093.608          | 773.401  | 4 | -1  |
| Nup84(154)-Nup145c(335/338)    | WLNSITSGGLKSCDLDFPLR(11)-DLAELQLQK(1):1                            | 7.7E-05           | 3316.712 | 3320.732          | 830.181  | 4 | -3  |
| Nup84(544)-Nup84(565)          | VKALEQFMER(2)-NYELEK(5):0                                          | 1.5E-04           | 2026.019 | 2030.046          | 507.511  | 4 | -1  |
| Nup84(544)-Nup84(598)          | VKALEQFMER(2)-EYEEWQK(3):0                                         | 1.3E-06           | 2242.073 | 2246.106          | 561.528  | 4 | 2   |
| Nup84(592)-Nup84(626)          | IADNISKDENEDQFLEEITQYEHLIKIR(26)-DTFELIK(1):1                      | 2.1E-10           | 4306.164 | 4312.208          | 718.701  | 6 | 0   |
| Nup84(619)-Nup84(599)          | SVSLLSSESNIPTLIEKQGFQSK(17)-EYEEWQK(4):0                           | 1.6E-04           | 3468.766 | 3472.792          | 868.197  | 4 | -1  |
| Nup84(712)-Nup133(935)         | LKEYLDELVAR(2)-LSSLLVEK(7):0                                       | 7.5E-06           | 2088.219 | 2092.246          | 523.061  | 4 | -1  |
| Nup85(14)-Nup85(2)             | LLMDVDQDFLDDGTAQLSNNKTDEEEQLYK(6)-TIDDSNR(1):0                     | 1.6E-13           | 4607.124 | 4612.156          | 922.430  | 5 | -1  |
| Nup85(17)-Seh1(1)              | LLMDVDQDFLDDGTAQLSNNKTDEEEQLYK(9)-MQPFDSGHDDLVDVYDFYGR(1):1        | 3.2E-15           | 6258.790 | 6264.833          | 1044.139 | 6 | 0   |
| Nup85(2)-Seh1(1)               | TIDDSNRLLMDVDQDFLDDGTAQLSNNKTDEEEQLYK(1)-MQPFDSGHDDLVDVYDFYGR(1):0 | 4.8E-08           | 7028.162 | 7034.191          | 1172.363 | 6 | -2  |
| Nup85(30)-Nup85(164)           | LLMDVDQDFLDDGTAQLSNNKTDEEEQLYK(22)-VKDQDGR(3):1                    | 1.8E-04           | 4448.060 | 4453.096          | 890.619  | 5 | 0   |
| Nup85(536)-Nup145c(70)         | LPEIAKEIYTTLGNQMLS AHNIESIANFSR(6)-AYEPDLSADFEIEASPK(3):0          | 1.4E-06           | 5523.703 | 5528.780          | 1105.764 | 5 | 7.4 |
| Nup85(585)-Nup145c(42)         | SYSWLLFEASCMEGQKLLDDPVLNAIVSK(16)-TLAQSKPSDKEVILK(9):1             | 9.3E-04           | 4837.492 | 4843.536          | 807.256  | 6 | 0   |

|                         |                                                     |         |          |          |         |   |    |
|-------------------------|-----------------------------------------------------|---------|----------|----------|---------|---|----|
| Nup85(705)-Seh1(144)    | WDDADEKSSNLYETIHEADK(7)-LYDALEPSDLR(9):1            | 9.3E-03 | 3613.695 | 3617.720 | 904.429 | 4 | -1 |
| Nup85(85)-Nup85(63)     | LGPLSYQNMAFITAKDKYK(15)-NGDKMPLK(3):0               | 4.1E-10 | 3070.598 | 3075.629 | 615.125 | 5 | -2 |
| Nup85(87)-Nup85(59)     | LGPLSYQNMAFITAKDKYK(17)-DPVSGAILVPMTVNDQPIEK(19):0  | 5.2E-09 | 4291.227 | 4296.268 | 859.254 | 5 | 1  |
| Sec13(10)-Nup145c(164)  | VVIANAHNELIHDAVLDYYGK(9)-FSTGSMMLTKDIVGK(11):1      | 4.2E-06 | 3931.055 | 3937.095 | 656.182 | 6 | -1 |
| Sec13(186)-Sec13(239)   | IWKYNSDAQTYVLESTLEGHSDWVR(3)-TCHWTQDNEQGPWK(10):0   | 6.0E-10 | 4853.282 | 4858.313 | 971.662 | 5 | -1 |
| Sec13(2)-Nup120(990)    | VVIANAHNELIHDAVLDYYGK(1)-AAAEVLYQYILMQADLDVIR(15):0 | 1.2E-11 | 4785.495 | 4791.539 | 798.590 | 6 | 0  |
| Sec13(2)-Nup145c(164)   | VVIANAHNELIHDAVLDYYGK(1)-FSTGSMMLTKDIVGK(11):0      | 1.8E-04 | 4087.156 | 4093.208 | 682.203 | 6 | 2  |
| Sec13(2)-Nup145c(22)    | VVIANAHNELIHDAVLDYYGK(1)-QEDGGEQPLR(2):0            | 2.8E-08 | 3462.717 | 3467.750 | 693.549 | 5 | -1 |
| Sec13(2)-Nup145c(283)   | VVIANAHNELIHDAVLDYYGK(1)-LTSWIVSQIGPEIEEK(15):0     | 2.5E-06 | 4163.158 | 4168.219 | 833.649 | 5 | 6  |
| Sec13(2)-Nup145c(42)    | VVIANAHNELIHDAVLDYYGK(1)-TLAQSKPSDK(9):0            | 2.5E-04 | 3408.768 | 3413.807 | 682.762 | 5 | 1  |
| Sec13(2)-Nup145c(60/61) | VVIANAHNELIHDAVLDYYGK(1)-TDGTFGTLSGKDDSDIVEEK(12):1 | 5.4E-03 | 4333.139 | 4339.191 | 723.200 | 6 | 2  |
| Sec13(2)-Nup145c(72)    | VVIANAHNELIHDAVLDYYGK(1)-AYEPDLSADDFEGIEASPK(5):1   | 4.6E-13 | 4388.112 | 4393.149 | 878.630 | 5 | 0  |
| Sec13(2)-Sec13(37)      | VVIANAHNELIHDAVLDYYGK(1)-TIKIFEVEGETHK(6):0         | 1.5E-09 | 3865.005 | 3871.049 | 645.175 | 6 | 0  |
| Sec13(2)-Sec13(41)      | VVIANAHNELIHDAVLDYYGK(1)-IFEVEGETHK(7):0            | 1.3E-05 | 3522.778 | 3528.818 | 588.136 | 6 | -1 |
| Sec13(2)-Sec13(47)      | VVIANAHNELIHDAVLDYYGK(1)-LIDTLTGHEGVPVWR(3):0       | 8.5E-04 | 3928.027 | 3934.075 | 655.680 | 6 | 1  |
| Sec13(2)-Seh1(141)      | VVIANAHNELIHDAVLDYYGK(1)-LYDALEPSDLR(6):0           | 8.3E-12 | 3625.842 | 3630.874 | 726.174 | 5 | -1 |
| Sec13(2)-Seh1(279)      | VVIANAHNELIHDAVLDYYGK(1)-SDSNTEEK(2):0              | 3.8E-07 | 3243.568 | 3248.608 | 649.722 | 5 | 1  |
| Sec13(22)-Sec13(39/41)  | VVIANAHNELIHDAVLDYYGK(21)-IFEVEGETHK(5/7):0         | 4.4E-10 | 3678.879 | 3682.912 | 920.729 | 4 | 1  |
| Sec13(277)-Sec13(294)   | ASWSLSGNVLAALSGGDNKVTWLK(18)-WEPAGEVHQ(6):0         | 3.7E-05 | 3435.721 | 3439.747 | 859.936 | 4 | -1 |
| Sec13(282)-Nup145c(179) | VTLWKENLEGK(5)-RLPTELQR(5):0                        | 1.3E-05 | 2309.285 | 2314.317 | 462.862 | 5 | -2 |
| Sec13(282)-Nup145c(438) | VTLWKENLEGK(5)-LYKEVR(4):0                          | 1.9E-06 | 2104.168 | 2108.197 | 527.049 | 4 | 0  |
| Sec13(283)-Nup145c(437) | ASWSLSGNVLAALSGGDNKVTLWKENLEGK(24)-LYKEVR(3):0      | 8.9E-06 | 3861.042 | 3867.082 | 644.513 | 6 | -1 |
| Sec13(286)-Nup145c(437) | ENLEGKWEPAGEVHQ(4)-LYKEVR(3):0                      | 5.1E-03 | 2510.255 | 2514.284 | 628.571 | 4 | 0  |
| Sec13(288)-Sec13(250)   | ENLEGKWEPAGEVHQ(6)-TLLKEEK(5):0                     | 1.7E-04 | 2563.292 | 2567.318 | 641.829 | 4 | -1 |
| Seh1(1)-Nup85(32)       | MQPFDSGHDDLVDVYDFYGR(1)-TDEEEQLYK(2):0              | 9.4E-08 | 3762.642 | 3767.678 | 753.536 | 5 | 0  |
| Seh1(1)-Nup85(33)       | MQPFDSGHDDLVDVYDFYGR(1)-TDEEEQLYK(3):0              | 1.6E-13 | 3746.647 | 3751.695 | 750.341 | 5 | 3  |
| Seh1(1)-Nup85(4)        | MQPFDSGHDDLVDVYDFYGR(1)-TIDDSNR(3):0                | 2.5E-03 | 3412.505 | 3417.538 | 683.507 | 5 | -1 |
| Seh1(198)-Seh1(279)     | GKDGKLVAAK(2)-SDSNTEEK(2):0                         | 4.2E-08 | 2013.013 | 2018.049 | 403.610 | 5 | 0  |
| Seh1(2)-Nup85(34)       | QPFDGHDLDVHDVYDFYGR(1)-TDEEEQLYK(4):0               | 4.0E-05 | 3615.607 | 3619.603 | 904.893 | 4 | -9 |
| Seh1(2)-Nup85(4/5)      | QPFDGHDLDVHDVYDFYGR(1)-MTIDDSNR(1):0                | 6.8E-04 | 3412.505 | 3417.538 | 683.507 | 5 | -1 |
| Seh1(201)-Seh1(279)     | DGKLVAAK(3)-SDSNTEEK(2):0                           | 1.2E-06 | 1827.896 | 1831.925 | 457.981 | 4 | 0  |
| Seh1(201)-Seh1(283)     | GKDGKLVAAK(5)-SDSNTEEK(6):0                         | 2.9E-08 | 2013.013 | 2017.040 | 504.259 | 4 | -1 |
| Seh1(207)-Seh1(279/283) | LHVAAKLPGHK(6)-SDSNTEEK(2):1                        | 5.5E-05 | 2060.065 | 2064.092 | 516.022 | 4 | -1 |
| Seh1(37)-Seh1(89/92)    | VFKLDKDTSNWELSDSWR(3)-LWEEDPDQECSGR(10):0           | 1.6E-06 | 3955.759 | 3960.788 | 792.156 | 5 | -2 |
| Seh1(40)-Nup145c(44)    | LDKDTSNWELSDSWR(3)-TLAQSKPSDK(11):0                 | 4.0E-12 | 3488.779 | 3493.815 | 698.763 | 5 | 0  |
| Seh1(40)-Nup85(2)       | LDKDTSNWELSDSWR(3)-TIDDSNR(1):0                     | 1.4E-04 | 2652.205 | 2656.229 | 664.056 | 4 | -2 |
| Seh1(79)-Nup85(2)       | IISASYDKTVK(9)-TIDDSNR(1):0                         | 2.0E-07 | 2096.075 | 2100.102 | 525.025 | 4 | -1 |

Mod\_Sites

Carbamidomethyl

Oxidation\_M

Oxidation\_M  
Carbamidomethyl

Oxidation\_M

Carbamidomethyl

Carbamidomethyl

Carbamidomethyl

Carbamidomethyl

Oxidation\_M

Carbamidomethyl

Oxidation\_M

Oxidation\_M

Oxidation\_M

Oxidation\_M

Carbamidomethyl

Carbamidomethyl
